# Supplementary material for: Cross-talk between PRMT1-mediated methylation and ubiquitylation on RBM15 controls RNA splicing
Source: eLife journal article supplement (doi:10.7554/elife.07938), 2015-11-17
Supplement: supp [file elife-07938-supp-v1.zip]

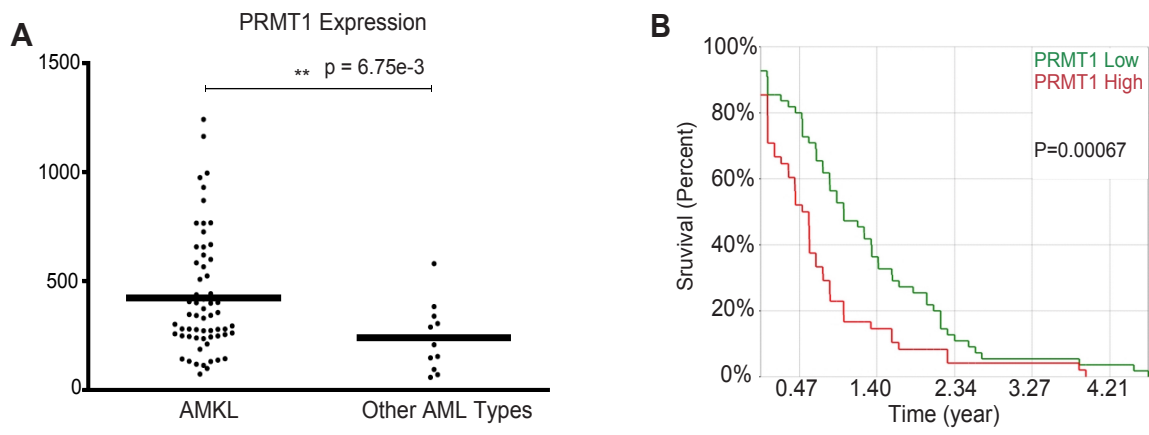

**Figure 1-figure supplement 1.** PRMT1 is overexpressed in AMKL leukemia and associated with short survival rate in AML.
