# Supplementary material for: Cross-talk between PRMT1-mediated methylation and ubiquitylation on RBM15 controls RNA splicing
Source: eLife journal article supplement (doi:10.7554/elife.07938), 2015-11-17
Supplement: supp [file elife-07938-supp-v1.zip]

Archive with 21 entries (21 files):
- elife_poa_e07938_Figure_5_figure_supplement_4.pdf
- elife_poa_e07938_Figure_1_figure_supplement_2.pdf
- elife_poa_e07938_Figure_6_figure_supplement_2.pdf
- elife_poa_e07938_Figure_3_figure_supplement_1.pdf
- elife_poa_e07938_Figure_5_source_data_3.xls
- elife_poa_e07938_Supplementary_File_1.xlsx
- elife_poa_e07938_Figure_1_figure_supplement_3.pdf
- elife_poa_e07938_Figure_3_figure_supplement_2.pdf
- elife_poa_e07938_Figure_5_figure_supplement_3.pdf
- elife_poa_e07938_Figure_5_source_data_1.xlsx
- elife_poa_e07938_Figure_1_figure_supplement_4.pdf
- elife_poa_e07938_Figure_7_source_data_1.xls
- elife_poa_e07938_Figure_5_figure_supplement_2.pdf
- elife_poa_e07938_Supplementary_File_2.xlsx
- elife_poa_e07938_Figure_6_figure_supplement_3.pdf
- elife_poa_e07938_Figure_1_figure_supplement_1.pdf
- elife_poa_e07938_Figure_4_figure_supplement_2.pdf
- elife_poa_e07938_Figure_4_figure_supplement_1.pdf
- elife_poa_e07938_Figure_5_figure_supplement_1.pdf
- elife_poa_e07938_Figure_6_figure_supplement_1.pdf
- elife_poa_e07938_Figure_5_source_data_2.xlsx
