# Supplementary material for: Cross-talk between PRMT1-mediated methylation and ubiquitylation on RBM15 controls RNA splicing
Source: eLife journal article supplement (doi:10.7554/elife.07938), 2015-11-17
Supplement: supp [file elife-07938-supp-v1.zip › elife_poa_e07938_Figure_5_source_data_1.xlsx]

## Sheet: result_updated_significant.csv
chromosome	start	end	width	strand	entrez.id	annotation	symbol	log2FoldChange	pvalue	fdr	XZ3_ACTTGA_L003	XZ4_GATCAG_L004	XZ5_TAGCTT_L004	XZ6_GGCTAC_L004		distance
chr1	1194395	1194750	356	-	118424	intron	UBE2J2	3.42729	8.49219e-05	0.00267568	1	105	3	126		-355
chr1	1296255	1296573	319	*	NA	intergenic	NA	2.54603	0.00627376	0.0476286	3	56	2	105		-318
chr1	1322075	1322580	506	-	81669	utr3	CCNL2	1.17717	0.00124698	0.0172039	89	1101	126	1534		-505
chr1	1322673	1322934	262	-	81669	cds	CCNL2	1.16733	0.00634102	0.0479463	34	394	46	583		-261
chr1	1414716	1415487	772	+	83858	intron	ATAD3B	3.36973	1.94929e-13	7.0064e-11	10	545	15	865		-771
chr1	1453329	1453919	591	+	55210	intron	ATAD3A	2.537	4.22847e-06	0.000255551	6	227	12	341		-590
chr1	2209148	2209437	290	+	6497	intron	SKI	3.18338	1.75966e-08	2.23575e-06	7	267	6	374		-289
chr1	2454159	2454432	274	-	55229	intron	PANK4	2.78276	0.00179449	0.0218985	1	74	4	113		-273
chr1	6167175	6167896	722	-	26038	intron	CHD5	2.37143	0.000197186	0.0049377	7	186	6	171		-721
chr1	6209748	6210008	261	-	26038	intron	CHD5	3.78834	3.67894e-08	4.20492e-06	4	194	2	255		-260
chr1	6210110	6210574	465	-	26038	intron	CHD5	3.73863	9.23736e-16	5.04674e-13	9	591	12	939		-464
chr1	6997232	6997563	332	+	23261	intron	CAMTA1	2.76691	0.00197717	0.0232036	2	83	3	100		-331
chr1	7552717	7553493	777	+	23261	intron	CAMTA1	2.68785	5.81182e-05	0.0020328	5	144	5	206		-776
chr1	7566621	7567280	660	+	23261	intron	CAMTA1	2.26221	0.00429438	0.037619	6	90	2	118		-659
chr1	8045006	8045291	286	+	11315	utr3	PARK7	2.39477	0.000713672	0.0120193	6	230	17	435		-285
chr1	8050212	8050658	447	*	NA	intergenic	NA	3.16847	0.000538382	0.00992867	2	86	2	108		-446
chr1	8921085	8921361	277	-	2023	utr3	ENO1	3.37393	1.0862e-21	1.97811e-18	62	3255	76	4498		-276
chr1	10171136	10171439	304	+	10277	intron	UBE4B	2.93651	0.000288842	0.00649876	1	103	6	191		-303
chr1	10479803	10480131	329	+	5226	utr3	PGD	2.95488	1.47572e-11	3.76751e-09	14	617	21	853		-328
chr1	12149925	12150189	265	+	943	intron	TNFRSF8	3.33435	6.65107e-06	0.000367788	5	164	1	159		-264
chr1	14107202	14107496	295	+	7799	cds	PRDM2	2.95547	1.828e-06	0.0001261	3	188	8	275		-294
chr1	16946829	16947180	352	-	84809	intron	CROCCP2	1.49268	0.000590658	0.0105665	31	403	33	575		-351
chr1	17253581	17253826	246	+	9696	intron	CROCC	2.77278	0.000297277	0.00661899	5	138	2	115		-245
chr1	17253948	17254192	245	+	9696	intron	CROCC	5.3122	0.000147064	0.00397975	1	122	0	87		-244
chr1	19545484	19545890	407	-	23065	utr3	KIAA0090	1.57029	0.00255407	0.026938	17	218	15	297		-406
chr1	22418262	22418540	279	+	998	utr3	CDC42	2.3624	9.44195e-06	0.000484823	13	404	26	694		-278
chr1	23409744	23410139	396	+	23028	utr3	KDM1A	1.97312	1.82158e-05	0.000839123	22	346	19	532		-395
chr1	25808855	25809180	326	+	55219	intron	TMEM57	2.87205	0.000339059	0.007253	5	100	1	139		-325
chr1	26227080	26227519	440	-	3925	intron.utr3	STMN1	1.53035	0.000465027	0.00894893	75	1006	98	1733		-439
chr1	26581672	26582348	677	+	64793	cds	CEP85	1.25744	0.00121301	0.0168954	56	701	72	956		-676
chr1	27887104	27887399	296	-	27245	intron	AHDC1	3.01552	0.00548111	0.0438405	3	52	0	81		-295
chr1	27915145	27915514	370	-	27245	intron	AHDC1	3.72954	7.38956e-08	7.55715e-06	5	173	1	262		-369
chr1	27915782	27916198	417	-	27245	intron	AHDC1	2.3316	0.000412747	0.00826613	4	133	8	195		-416
chr1	27921625	27922113	489	-	27245	intron	AHDC1	3.57919	8.98848e-11	1.93337e-08	9	321	3	460		-488
chr1	27922212	27922480	269	-	27245	intron	AHDC1	2.25974	0.0010356	0.0152422	9	114	2	174		-268
chr1	31739813	31740143	331	-	9410	intron	SNRNP40	2.33269	0.00513686	0.0422661	4	90	3	99		-330
chr1	32508245	32508708	464	+	10657	utr3	KHDRBS1	1.35824	0.000992731	0.0148108	44	475	42	727		-463
chr1	32798723	32799190	468	+	3065	utr3	HDAC1	1.44599	0.00163869	0.0205906	33	336	19	430		-467
chr1	35649807	35650090	284	-	6421	utr3	SFPQ	1.03204	0.00508528	0.0419225	112	888	94	1414		-283
chr1	35658457	35658726	270	-	6421	cds	SFPQ	1.45197	0.00065389	0.0113407	26	518	47	548		-269
chr1	36027055	36027310	256	+	23154	intron	NCDN	2.86631	0.00326962	0.0314605	2	67	2	91		-255
chr1	39458203	39458512	310	+	79647	intron	AKIRIN1	2.29619	0.000162214	0.00429796	7	169	8	230		-309
chr1	40538002	40538261	260	+	10487	utr3	CAP1	1.58408	0.00646138	0.0485438	12	161	11	212		-259
chr1	40736224	40736475	252	+	10269	intron	ZMPSTE24	3.8606	0.000554848	0.010134	0	69	2	87		-251
chr1	42657019	42657335	317	-	22887	cds	FOXJ3	2.41385	7.46155e-07	5.90804e-05	18	374	10	428		-316
chr1	43167694	43167963	270	+	4904	utr3	YBX1	1.41991	0.000188996	0.00480598	48	840	89	1143		-269
chr1	44691641	44692362	722	-	79033	intron	ERI3	1.75658	0.000711782	0.0120097	15	250	15	295		-721
chr1	45976733	45977023	291	-	5052	utr3	PRDX1	2.93074	5.74444e-11	1.26549e-08	19	569	13	752		-290
chr1	46713486	46714005	520	+	8438	utr5	RAD54L	1.90804	2.61849e-05	0.00109573	24	422	21	485		-519
chr1	46763432	46763839	408	-	10489	intron	LRRC41	3.73166	6.60993e-05	0.0022347	3	100	0	115		-407
chr1	47183604	47184354	751	-	9813	utr5	KIAA0494	1.68742	0.00030765	0.00676113	18	321	26	447		-750
chr1	47689122	47689507	386	-	6886	intron	TAL1	1.36254	0.00367748	0.0340304	25	293	25	404		-385
chr1	51820939	51821232	294	-	2060	utr3	EPS15	1.5076	0.00225893	0.0251763	17	235	22	370		-293
chr1	51947811	51948116	306	-	2060	intron	EPS15	2.34393	0.0046803	0.0398789	4	76	3	118		-305
chr1	53379862	53380148	287	-	55268	intron	ECHDC2	2.30563	0.00609688	0.0468136	2	88	5	97		-286
chr1	53516424	53516676	253	*	NA	intergenic	NA	2.48442	1.19892e-05	0.000590598	2	207	15	309		-252		scp2
chr1	55535739	55536120	382	-	23358	intron	USP24	2.80124	0.00455589	0.039203	2	60	2	92		-381
chr1	58712261	58712606	346	-	1600	intron	DAB1	2.35241	0.00455648	0.039203	3	80	4	114		-345
chr1	63909021	63909663	643	-	23421	intron	ITGB3BP	2.29086	7.54492e-06	0.000404127	15	291	10	370		-642
chr1	65299001	65299391	391	-	3716	utr3	JAK1	1.88872	0.000443018	0.00868143	11	263	24	446		-390
chr1	65467218	65467511	294	*	NA	intergenic	NA	3.63592	7.77241e-09	1.05108e-06	6	204	2	342		-293		LINC01359
chr1	67794668	67794947	280	+	3595	intron	IL12RB2	3.13153	0.00317258	0.0309298	2	59	1	84		-279
chr1	67876783	67877158	376	-	26135	utr3	SERBP1	1.12122	0.00231723	0.025586	114	1075	90	1317		-375
chr1	67877836	67878113	278	-	26135	utr3	SERBP1	2.26722	1.59449e-10	3.29975e-08	93	2058	76	2306		-277
chr1	70716302	70716592	291	+	9295	cds	SRSF11	1.00569	0.00335987	0.0319907	273	2233	220	3142		-290
chr1	70716874	70717103	230	+	9295	utr3	SRSF11	1.14371	0.00226216	0.0251832	79	856	95	1232		-229
chr1	70717208	70717633	426	+	9295	utr3	SRSF11	1.06207	0.00159645	0.0203596	377	3225	308	4541		-425
chr1	83640154	83640700	547	*	NA	intergenic	NA	2.32924	5.93453e-05	0.00206655	6	209	11	250		-546
chr1	89229747	89230172	426	+	5586	intron	PKN2	1.81552	0.00123026	0.0170593	13	202	10	233		-425
chr1	89401530	89401900	371	-	56267	utr3	CCBL2	2.89392	1.79294e-05	0.000827326	3	140	6	225		-370
chr1	90382816	90383237	422	+	55144	intron	LRRC8D	1.63918	0.00536665	0.0432578	7	172	15	195		-421
chr1	93791938	93792262	325	-	100131564	intron	LOC100131564	3.53186	0.00342478	0.032473	0	60	2	63		-324
chr1	100531066	100531385	320	+	64645	intron	HIAT1	2.62349	0.00190472	0.0226617	1	79	5	122		-319
chr1	100611439	100611742	304	+	54482	intron	CCDC76	1.73706	0.00518848	0.0424861	8	133	10	193		-303
chr1	101406742	101407047	306	+	148867	intron	SLC30A7	2.37088	0.00401189	0.035901	4	76	3	122		-305
chr1	108857865	108858402	538	*	NA	intergenic	NA	2.49631	0.000173321	0.00449204	7	158	4	175		-537
chr1	109241917	109242681	765	+	55119	cds	PRPF38B	1.16394	0.000765527	0.0125236	195	1829	184	2801		-764
chr1	109242942	109243293	352	+	55119	utr3	PRPF38B	1.35419	0.00160465	0.0203965	40	434	32	561		-351
chr1	110026917	110027331	415	+	127002	intron	ATXN7L2	2.04761	0.00169396	0.0210623	9	158	5	150		-414
chr1	110350610	110350911	302	*	NA	intergenic	NA	2.53832	5.85123e-08	6.14762e-06	15	415	16	560		-301
chr1	110458878	110459266	389	+	1435	intron	CSF1	2.34177	0.00163231	0.0205483	18	404	26	829		-388
chr1	110463715	110464104	390	+	1435	intron	CSF1	2.03032	0.000728253	0.0121525	10	166	11	306		-389
chr1	112003599	112003891	293	+	515	utr3	ATP5F1	3.33918	1.05363e-15	5.64354e-13	21	856	18	1295		-292
chr1	112164822	112165176	355	+	5906	intron	RAP1A	1.72133	0.00588173	0.0457622	9	151	9	167		-354
chr1	113212704	113212963	260	+	829	utr3	CAPZA1	2.2072	1.59168e-07	1.4993e-05	24	612	31	756		-259
chr1	115260030	115260296	267	-	7812	utr3	CSDE1	1.62615	0.000451835	0.00879742	24	375	23	401		-266
chr1	115260415	115260791	377	-	7812	utr3	CSDE1	1.529	0.000251795	0.00591935	29	502	47	685		-376
chr1	116559149	116559803	655	+	55356	intron	SLC22A15	3.14093	0.000673224	0.0115955	1	92	3	96		-654
chr1	116947042	116947308	267	-	84852	intron	ATP1A1OS	1.8226	0.000539001	0.00992867	15	268	13	259		-266
chr1	117910180	117910675	496	+	10905	utr5	MAN1A2	1.816	0.000428822	0.00849466	13	271	17	294		-495
chr1	117910834	117911113	280	+	10905	cds	MAN1A2	1.79093	0.00671463	0.0498385	9	117	6	165		-279
chr1	119691119	119691503	385	*	NA	intergenic	NA	2.12143	0.00653688	0.0489914	3	114	6	92		-384		LOC101929147
chr1	142673867	142674373	507	*	NA	intergenic	NA	3.24605	4.4116e-06	0.000262553	2	169	5	186		-506
chr1	143150380	143150642	263	*	NA	intergenic	NA	2.49425	0.00405379	0.0361368	2	81	4	101		-262		LOC102723769
chr1	143168963	143169463	501	*	NA	intergenic	NA	2.11715	0.00017031	0.00443834	10	191	10	281		-500		LOC102723769
chr1	143170012	143170251	240	*	NA	intergenic	NA	3.19404	0.00228473	0.0253501	2	63	1	86		-239
chr1	143173233	143173651	419	*	NA	intergenic	NA	3.22751	5.61076e-08	5.96378e-06	9	245	2	313		-418
chr1	143279046	143279322	277	*	NA	intergenic	NA	2.50218	0.00375282	0.0344591	4	80	2	104		-276
chr1	143440363	143440659	297	*	NA	intergenic	NA	3.00017	9.85984e-07	7.44036e-05	8	185	3	297		-296
chr1	150478950	150479221	272	+	80222	intron	TARS2	3.50072	0.00361345	0.0336316	2	49	0	75		-271
chr1	151030549	151030880	332	-	56882	intron	CDC42SE1	2.11299	0.00102627	0.0151539	10	155	4	170		-331
chr1	151298996	151299573	578	-	5298	intron	PI4KB	2.29158	0.0062198	0.0473804	5	79	2	107		-577
chr1	151732189	151732585	397	-	65005	utr3	MRPL9	1.93208	0.00468732	0.0398994	6	104	7	167		-396
chr1	153634530	153634998	469	-	3608	utr3	ILF2	1.34631	0.00229198	0.0253893	31	371	33	511		-468
chr1	154241569	154242021	453	+	9898	intron	UBAP2L	2.69478	2.73882e-06	0.000178559	7	231	8	293		-452
chr1	154951478	154951707	230	+	1163	utr3	CKS1B	4.346	0.0025246	0.0267407	1	54	0	55		-229
chr1	155823081	155823582	502	-	54856	cds	GON4L	1.65875	0.000410233	0.00824601	24	348	20	398		-501
chr1	155891167	155891417	251	-	22889	cds	KIAA0907	1.94254	0.00269682	0.0279685	3	138	12	172		-250
chr1	155945591	155945866	276	-	9181	intron	ARHGEF2	2.34663	0.000365733	0.00766747	6	147	6	182		-275
chr1	157964492	157964800	309	+	55243	intron	KIRREL	2.99373	0.00163669	0.0205749	2	84	2	86		-308
chr1	159888140	159888436	297	-	8407	utr3	TAGLN2	1.00325	0.00635725	0.0480258	94	1114	134	1344		-296
chr1	160178897	160179432	536	+	8682	intron	PEA15	2.31546	0.00114693	0.0163504	6	114	4	156		-535
chr1	160259650	160259949	300	-	1314	utr3	COPA	1.89651	0.000110397	0.00322054	11	280	23	407		-299
chr1	161128257	161128581	325	+	51506	utr3	UFC1	1.92918	0.000864111	0.0134808	9	164	11	251		-324
chr1	161183944	161184178	235	+	4720	utr3	NDUFS2	3.02844	0.000138631	0.00380633	5	226	10	449		-234
chr1	165631904	165632303	400	-	223	utr3	ALDH9A1	2.28332	0.000892487	0.0138131	8	122	3	169		-399
chr1	169890521	169890817	297	-	22920	utr3	KIFAP3	3.21596	0.000386811	0.00791142	1	72	3	132		-296
chr1	173457668	173457909	242	+	9588	utr3	PRDX6	2.17554	0.00294595	0.0294562	6	112	4	131		-241
chr1	174979096	174979343	248	+	27101	utr3	CACYBP	2.26225	0.000474199	0.0090887	5	145	8	192		-247
chr1	176137719	176137996	278	-	64326	intron	RFWD2	3.5157	0.00347212	0.03274	1	48	1	77		-277
chr1	182856561	182856831	271	+	1660	utr3	DHX9	3.66937	4.95481e-19	4.51168e-16	18	1220	20	1372		-270
chr1	183456326	183456663	338	+	9887	intron	SMG7	2.32582	0.00533851	0.0431328	4	90	3	98		-337
chr1	186090437	186090685	249	+	83872	intron	HMCN1	2.03669	0.00135309	0.0181833	8	156	7	174		-248
chr1	186090808	186091124	317	+	83872	intron	HMCN1	1.97645	0.000761999	0.0125168	10	189	9	212		-316
chr1	186095617	186096149	533	+	83872	intron	HMCN1	1.79547	3.25891e-05	0.00129259	33	531	25	544		-532
chr1	192955154	192955618	465	*	NA	intergenic	NA	1.92697	0.00667804	0.0496797	5	113	7	132		-464
chr1	192984709	192985202	494	-	51377	utr3	UCHL5	1.77076	0.000188238	0.00479225	23	305	17	437		-493
chr1	198235122	198235728	607	+	140609	intron	NEK7	2.16788	0.00468854	0.0398994	6	99	3	119		-606
chr1	203791435	203792002	568	+	9877	intron	ZC3H11A	2.09203	0.000174303	0.00450892	10	226	11	254		-567
chr1	207510188	207510528	341	+	1604	intron	CD55	2.74806	4.85421e-08	5.3254e-06	11	317	11	489		-340
chr1	207841984	207842411	428	+	1379	intron	CR1L	2.20251	3.29579e-06	0.000208397	21	417	13	418		-427
chr1	207867698	207868100	403	+	1379	cds	CR1L	1.26038	0.000297306	0.00661899	180	1881	151	2402		-402
chr1	220141944	220142211	268	+	26828	intron	RNU5F-1	1.89405	0.000539682	0.00992867	8	198	16	286		-267
chr1	220320914	220321280	367	+	55699	utr3	IARS2	1.97221	5.55248e-05	0.00195712	17	287	16	417		-366
chr1	220445077	220445471	395	-	25782	intron	RAB3GAP2	2.70869	7.1929e-06	0.000393765	7	210	6	247		-394
chr1	226259140	226259374	235	*	NA	overlap	NA	2.32302	0.000652854	0.0113407	7	108	4	195		-234		H3F3A
chr1	226548806	226549111	306	-	142	utr3	PARP1	2.57839	8.60712e-10	1.48811e-07	20	636	28	921		-305
chr1	226824536	226824796	261	-	3707	intron	ITPKB	4.62771	0.000625252	0.0110052	0	66	1	65		-260
chr1	227143592	227143890	299	+	56997	intron	ADCK3	4.00438	0.000206078	0.00511301	1	69	1	106		-298
chr1	227165534	227166224	691	+	56997	intron	ADCK3	4.34063	1.25415e-16	8.15707e-14	6	528	5	676		-690
chr1	227174625	227174996	372	+	56997	utr3	ADCK3	1.77849	0.000568705	0.0103156	16	231	14	328		-371
chr1	228426233	228426823	591	+	84033	intron	OBSCN	4.15779	3.13942e-09	4.58607e-07	1	238	4	236		-590
chr1	229577121	229577726	606	-	55746	utr3	NUP133	2.24403	1.02349e-05	0.000516794	14	289	12	377		-605
chr1	230411030	230411621	592	+	2590	intron	GALNT2	2.2731	0.000253648	0.00594844	11	170	7	309		-591
chr1	231146850	231147260	411	*	NA	intergenic	NA	2.38768	0.000420953	0.00837567	3	120	8	194		-410
chr1	235314031	235314670	640	-	23029	intron	RBM34	2.83885	0.00382093	0.0348735	2	70	2	84		-639
chr1	235656091	235656582	492	-	148789	intron	B3GALNT2	2.50364	9.29057e-05	0.00285479	7	152	5	218		-491
chr1	245017474	245017736	263	-	3192	utr3	HNRNPU	2.00203	6.07073e-06	0.000339824	49	765	45	1299		-262
chr1	247369463	247370102	640	*	NA	intergenic	NA	1.99007	0.00325832	0.0314292	8	119	5	161		-639
chr2	226580	227179	600	-	26751	intron	SH3YL1	3.23271	1.74906e-05	0.000809816	4	134	2	171		-599
chr2	277276	277571	296	+	52	utr3	ACP1	2.26923	0.000138643	0.00380633	12	181	4	237		-295
chr2	3203433	3203790	358	-	7260	intron	TSSC1	2.76521	0.00199322	0.0233485	2	82	3	101		-357
chr2	3340682	3340935	254	-	7260	intron	TSSC1	Inf	0.000963645	0.0145035	0	46	0	54		-253
chr2	9457626	9458008	383	+	8853	intron	ASAP2	3.34083	0.000963524	0.0145035	3	72	0	93		-382
chr2	9724962	9725423	462	-	10971	utr3	YWHAQ	1.48079	0.00296821	0.0296463	17	211	21	371		-461
chr2	10452000	10452402	403	+	3241	intron	HPCAL1	3.21558	3.8989e-11	9.02595e-09	10	475	11	575		-402
chr2	10452512	10452996	485	+	3241	intron	HPCAL1	3.44039	1.47506e-13	5.59642e-11	10	601	13	744		-484
chr2	10580610	10580935	326	-	4953	utr3	ODC1	1.93588	8.38243e-06	0.000439506	32	502	21	589		-325
chr2	10711799	10712300	502	-	79954	utr3	NOL10	2.07089	0.000777065	0.0126427	6	153	10	211		-501
chr2	10924055	10924329	275	+	245973	utr3	ATP6V1C2	1.60408	0.000474447	0.0090887	32	389	17	408		-274
chr2	11398750	11399114	365	-	9475	intron	ROCK2	3.48663	0.00426812	0.0374654	0	59	2	60		-364
chr2	15770947	15771225	279	+	1653	utr3	DDX1	2.9356	5.09917e-06	0.000293251	3	153	7	266		-278
chr2	26413810	26414141	332	-	3030	utr3	HADHA	2.42432	1.48939e-07	1.42258e-05	17	380	17	618		-331
chr2	26512830	26513307	478	+	3032	utr3	HADHB	2.28474	1.58551e-06	0.000112205	17	337	15	513		-477
chr2	32842793	32843628	836	+	57448	utr3	BIRC6	1.49015	0.00197849	0.0232059	19	273	24	382		-835
chr2	38972050	38972313	264	-	6432	utr3	SRSF7	1.65034	0.000669276	0.0115493	21	283	18	380		-263
chr2	44114946	44115265	320	-	10128	utr3	LRPPRC	2.40887	0.000140025	0.00383273	3	154	10	220		-319
chr2	44115512	44115789	278	-	10128	utr3	LRPPRC	4.21038	1.69527e-18	1.36205e-15	6	690	10	910		-277
chr2	45899316	45899582	267	+	5581	intron	PRKCE	4.3455	4.308e-07	3.6545e-05	3	174	0	150		-266
chr2	47387410	47387900	491	-	805	utr3	CALM2	1.16826	0.00197538	0.0232036	76	826	86	1148		-490
chr2	53109989	53110500	512	*	NA	intergenic	NA	4.19309	0.00185542	0.0222785	3	143	2	369		-511
chr2	61705205	61705541	337	-	7514	utr3	XPO1	1.52764	0.000197204	0.0049377	45	536	37	747		-336
chr2	63834068	63834319	252	+	4190	utr3	MDH1	3.07024	2.92932e-09	4.30217e-07	3	335	15	484		-251
chr2	65495884	65496237	354	+	10097	utr3	ACTR2	1.67546	2.2794e-05	0.000996264	57	666	36	949		-353
chr2	68612687	68612999	313	+	5341	intron	PLEK	3.95762	0.00029703	0.00661899	0	69	2	99		-312
chr2	70315984	70316263	280	+	5093	utr3	PCBP1	1.33264	0.00388734	0.0351984	18	334	42	486		-279
chr2	71576221	71577358	1138	+	27332	cds	ZNF638	1.14186	0.00106058	0.0154306	195	1967	165	2304		-1137
chr2	74266037	74266465	429	*	NA	intergenic	NA	1.86553	0.00557682	0.0443241	7	127	7	147		-428
chr2	75882240	75882797	558	+	9801	utr3	MRPL19	1.70268	0.00643516	0.0484505	9	132	9	186		-557
chr2	76208966	76209345	380	*	NA	intergenic	NA	1.86601	0.00179551	0.0218985	11	182	8	188		-379
chr2	76594389	76594848	460	*	NA	intergenic	NA	2.36485	0.00418626	0.0369391	5	86	2	109		-459
chr2	76672317	76672532	216	*	NA	intergenic	NA	3.2604	3.56035e-09	5.14593e-07	19	1557	39	1381		-215
chr2	86268225	86268582	358	-	25885	intron	POLR1A	3.07162	0.00431309	0.0377389	1	47	2	92		-357
chr2	86371091	86371385	295	-	10989	utr3	IMMT	2.65869	1.48767e-06	0.000106384	8	227	9	359		-294
chr2	96940517	96940860	344	-	23020	utr3	SNRNP200	1.55529	0.000212796	0.00526058	29	484	44	679		-343
chr2	97005377	97005648	272	+	23397	intron	NCAPH	3.39949	0.00613419	0.0469509	1	54	1	59		-271
chr2	97467191	97467924	734	+	26504	intron	CNNM4	2.78602	3.02991e-08	3.52205e-06	7	371	15	444		-733
chr2	99198935	99199486	552	+	3631	intron	INPP4A	2.56464	2.73827e-09	4.10996e-07	23	645	20	719		-551
chr2	100015830	100016183	354	+	9669	utr3	EIF5B	1.85341	0.000145885	0.00396102	18	283	17	404		-353
chr2	105906861	105907164	304	-	9392	intron	TGFBRAP1	3.70384	0.00188806	0.0225027	2	47	0	98		-303
chr2	105924061	105924722	662	-	9392	cds	TGFBRAP1	1.40742	0.00466004	0.0397961	16	236	24	340		-661
chr2	106712635	106712926	292	-	80146	intron	UXS1	2.97544	0.00178412	0.0218296	2	74	2	96		-291
chr2	109400086	109400536	451	+	5903	cds	RANBP2	1.54316	0.000836727	0.0132044	25	339	24	432		-450
chr2	112423816	112424384	569	*	NA	intergenic	NA	3.15139	1.14003e-05	0.000567255	2	156	5	177		-568
chr2	112998411	112998694	284	-	84524	intron	ZC3H8	2.65358	0.00150948	0.019561	4	82	2	124		-283
chr2	113252560	113252913	354	+	150465	intron	TTL	2.24066	0.00517013	0.0424122	1	91	7	112		-353
chr2	113534942	113535419	478	-	3552	intron	IL1A	1.78897	0.0020671	0.0238876	11	155	10	241		-477
chr2	114715064	114715324	261	+	10096	utr3	ACTR3	3.24731	5.51342e-13	1.81458e-10	21	871	23	1413		-260
chr2	114715524	114715779	256	+	10096	utr3	ACTR3	2.34383	7.08924e-06	0.000389651	10	260	13	374		-255
chr2	128262313	128262986	674	-	55677	cds	IWS1	1.51522	0.000166605	0.00436771	50	634	42	784		-673
chr2	133043826	133044318	493	*	NA	intergenic	NA	2.22846	2.49482e-10	4.97453e-08	84	1993	99	2645		-492
chr2	136598071	136598353	283	-	4175	utr3	MCM6	3.01109	2.53261e-08	2.99495e-06	11	328	9	556		-282
chr2	136664315	136664787	473	-	1615	utr3	DARS	2.4117	4.76669e-08	5.25047e-06	21	530	20	645		-472
chr2	144369561	144369851	291	+	55843	intron	ARHGAP15	4.33126	0.00283346	0.0287952	0	44	1	65		-290
chr2	150426204	150426614	411	-	27249	utr3	MMADHC	2.27205	9.97202e-05	0.00300669	7	186	10	259		-410
chr2	159507758	159508211	454	+	8502	intron	PKP4	2.93877	0.00294159	0.0294234	4	58	0	112		-453
chr2	160604324	160604579	256	+	64844	cds	2014-03-07	1.41989	0.00415715	0.0367868	25	248	15	332		-255
chr2	162135094	162135375	282	*	NA	intergenic	NA	2.1285	4.53183e-10	8.59695e-08	140	3021	144	3665		-281
chr2	162138617	162138906	290	*	NA	intergenic	NA	2.30504	1.01105e-09	1.68408e-07	36	1192	63	1438		-289
chr2	162267896	162268185	290	+	10213	utr3	PSMD14	3.2013	6.11187e-09	8.51826e-07	6	300	8	396		-289
chr2	170668217	170668533	317	+	6741	utr3	SSB	2.48178	2.2483e-09	3.45039e-07	20	670	33	934		-316
chr2	170772931	170773454	524	+	130507	intron	UBR3	1.9299	0.00174333	0.0215194	4	140	13	212		-523
chr2	171716822	171717177	356	+	2571	utr3	GAD1	1.9304	0.00369499	0.0341457	5	121	9	168		-355
chr2	174939757	174940217	461	-	29789	utr3	OLA1	1.56641	0.00197737	0.0232036	20	242	15	319		-460
chr2	175045924	175046333	410	-	29789	intron	OLA1	2.58904	0.00027482	0.00626126	3	132	6	159		-409
chr2	175936315	175936703	389	*	NA	intergenic	NA	3.2886	0.00131398	0.0178446	3	70	0	89		-388
chr2	178084711	178085003	293	+	220988	utr3	HNRNPA3	2.50834	1.54936e-08	1.97775e-06	20	573	19	614		-292
chr2	182237550	182237977	428	*	NA	intergenic	NA	2.07352	0.00043142	0.00853375	5	155	13	259		-427
chr2	187292597	187292867	271	*	NA	intergenic	NA	2.77284	0.000752304	0.0124118	1	104	5	115		-270
chr2	187373644	187373990	347	+	55854	utr3	ZC3H15	1.69751	1.19677e-06	8.85966e-05	146	2090	105	2271		-346
chr2	191827696	191828061	366	+	2744	utr3	GLS	1.88651	0.00125622	0.0172944	11	194	9	201		-365
chr2	198256749	198257046	298	-	23451	utr3	SF3B1	1.81952	3.24435e-06	0.000205629	45	703	49	1108		-297
chr2	198351358	198351729	372	-	3329	utr3	HSPD1	3.46745	2.97207e-22	6.76567e-19	65	3135	51	3775		-371
chr2	198840580	198841139	560	+	5334	intron	PLCL1	2.745	7.45263e-05	0.00242073	3	148	6	176		-559
chr2	217039665	217040110	446	+	7520	intron	XRCC5	2.5841	9.57392e-06	0.000489758	8	225	7	258		-445
chr2	217052519	217052838	320	+	7520	intron	XRCC5	3.06138	0.00105106	0.0153785	2	72	2	110		-319
chr2	217069920	217070285	366	+	7520	utr3	XRCC5	2.06484	1.88621e-06	0.000129788	21	485	30	671		-365
chr2	217757708	217758087	380	*	NA	intergenic	NA	2.89958	0.00290653	0.029196	16	736	43	1709		-379
chr2	218108245	218108525	281	*	NA	intergenic	NA	3.12441	0.000229535	0.00553906	14	450	15	951		-280
chr2	219118623	219119013	391	+	10109	utr3	ARPC2	1.44491	0.000796141	0.0128662	32	419	36	585		-390
chr2	219128887	219129313	427	-	14	utr3	AAMP	2.12018	0.000215742	0.00529507	11	189	8	259		-426
chr2	220369044	220369538	495	+	29926	intron	GMPPA	1.96532	0.00130018	0.0177497	8	142	9	220		-494
chr2	230631949	230632432	484	-	9320	utr3	TRIP12	1.38249	0.000765306	0.0125236	48	510	39	722		-483
chr2	232319534	232319890	357	-	4691	utr3	NCL	2.12895	5.87689e-10	1.07744e-07	117	2517	138	3533		-356
chr2	236493416	236493778	363	+	116987	intron	AGAP1	3.11305	0.00349576	0.0328609	2	59	1	82		-362
chr2	239982886	239983247	362	-	9759	intron	HDAC4	5.87864	1.26666e-08	1.65557e-06	1	141	0	178		-361
chr2	240900176	240900583	408	-	4705	utr3	NDUFA10	1.79858	0.00164033	0.0206019	10	169	12	247		-407
chr2	241437490	241437891	402	-	51281	intron	ANKMY1	2.38635	2.34377e-05	0.00101627	7	242	11	261		-401
chr2	241438474	241438739	266	-	51281	intron	ANKMY1	3.15242	4.29119e-07	3.65179e-05	2	188	8	296		-265
chr2	241440427	241440716	290	-	51281	intron	ANKMY1	2.19467	0.000142985	0.00389813	13	191	5	256		-289
chr2	241448263	241448611	349	-	51281	intron	ANKMY1	3.47775	9.85094e-13	3.05793e-10	8	468	11	682		-348
chr2	241466621	241467222	602	-	51281	intron	ANKMY1	3.64333	2.09123e-19	2.28504e-16	27	1227	15	1615		-601
chr2	242291438	242291771	334	+	4735	utr3	2014-09-02	1.45093	0.000326078	0.00704149	45	584	48	793		-333
chr2	242424631	242425204	574	+	9855	intron	FARP2	3.31377	0.000193186	0.00487282	3	104	1	109		-573
chr2	242559467	242560047	581	-	51078	intron	THAP4	2.34504	3.22071e-07	2.84725e-05	19	433	17	555		-580
chr3	8853832	8854203	372	*	NA	intergenic	NA	2.69844	0.000111792	0.003235	4	152	5	160		-371
chr3	9509167	9509472	306	+	55209	intron	SETD5	2.90044	1.21783e-07	1.19238e-05	5	303	11	336		-305
chr3	9810689	9811182	494	-	8536	intron	CAMK1	4.96525	3.37187e-08	3.88648e-06	0	142	2	195		-493
chr3	9860689	9861026	338	+	26140	intron	TTLL3	2.66847	1.00881e-08	1.35087e-06	15	422	15	615		-337
chr3	10342646	10342913	268	-	6396	utr3	SEC13	2.13285	0.00146867	0.0192513	8	141	9	270		-267
chr3	12635422	12635820	399	-	5894	intron	RAF1	2.69558	0.00125907	0.0173182	1	101	5	106		-398
chr3	14488495	14488885	391	+	6533	intron	SLC6A6	2.44867	0.000430251	0.00851678	7	131	3	164		-390
chr3	14511107	14511482	376	+	6533	intron	SLC6A6	2.27807	0.0015203	0.0196731	6	124	4	136		-375
chr3	23961040	23961313	274	+	6138	intron.utr3	RPL15	2.94905	9.62375e-13	3.02175e-10	24	869	22	1043		-273
chr3	25639526	25639834	309	-	7155	utr3	TOP2B	2.46842	4.20087e-08	4.70308e-06	17	461	20	650		-308
chr3	37029488	37029966	479	-	9852	utr3	EPM2AIP1	1.92229	4.25022e-05	0.00159922	26	361	13	436		-478
chr3	38041071	38041401	331	+	50853	intron	VILL	3.38467	8.98228e-07	6.87308e-05	4	161	3	237		-330
chr3	38405501	38406181	681	+	9942	intron	XYLB	2.25809	0.000482299	0.00918116	7	147	6	189		-680
chr3	39193644	39194245	602	-	64651	intron	CSRNP1	2.59574	0.0010277	0.0151656	4	103	3	125		-601
chr3	42686080	42686426	347	+	4820	intron	NKTR	3.63341	0.000148646	0.00400846	1	91	2	109		-346
chr3	47002336	47002640	305	-	151903	intron	CCDC12	4.67636	4.14737e-11	9.52048e-09	0	227	4	326		-304
chr3	49094324	49094810	487	-	54870	cds	QRICH1	1.3682	0.00449491	0.0387954	20	297	26	340		-486
chr3	49396727	49397099	373	-	387	utr3	RHOA	1.30054	0.000937948	0.0142344	53	676	64	881		-372
chr3	49397365	49397726	362	-	387	utr3	RHOA	2.01502	3.88569e-07	3.39069e-05	37	763	43	983		-361
chr3	49717225	49717799	575	+	327	intron	APEH	1.66434	0.00598997	0.0462627	7	145	13	198		-574
chr3	50155787	50156330	544	+	10181	utr3	RBM5	1.13677	0.00449076	0.0387841	49	588	66	779		-543
chr3	50274092	50274570	479	+	2771	intron	GNAI2	2.51061	0.000483855	0.00919174	7	133	2	142		-478
chr3	52002709	52003192	484	-	84836	utr3	ABHD14B	2.10478	8.71073e-07	6.72178e-05	21	505	32	733		-483
chr3	52741806	52742099	294	+	28972	utr3	SPCS1	1.94114	0.00628519	0.0476876	1	108	11	140		-293
chr3	57633188	57633715	528	-	201627	intron	FAM116A	2.3045	0.00214103	0.0243897	2	111	7	127		-527
chr3	58413447	58413770	324	-	5162	utr3	PDHB	1.96038	0.00109386	0.015702	6	160	12	219		-323
chr3	63819594	63819868	275	+	132200	intron	C3orf49	3.12309	0.000173485	0.00449204	3	101	2	135		-274
chr3	69153803	69154229	427	+	10550	utr3	ARL6IP5	1.97859	0.00117984	0.0166199	10	155	7	208		-426
chr3	77404197	77404454	258	+	6092	intron	ROBO2	2.05192	0.00625539	0.0475322	4	101	6	122		-257
chr3	81538920	81539175	256	-	2632	utr3	GBE1	2.83854	0.000114813	0.00329447	6	164	2	139		-255
chr3	81539303	81539567	265	-	2632	utr3	GBE1	2.43179	0.00289235	0.0291436	6	105	1	96		-264
chr3	98295917	98296332	416	*	NA	intergenic	NA	2.42999	0.00152166	0.0196731	5	90	3	146		-415
chr3	99542251	99542686	436	+	84319	intron	C3orf26	2.53508	4.40926e-06	0.000262553	7	250	11	312		-435
chr3	99745633	99746026	394	+	84319	intron	C3orf26	2.15703	0.000528655	0.00983069	8	160	7	201		-393
chr3	110272069	110272384	316	*	NA	intergenic	NA	1.85041	0.00476945	0.0403365	7	128	8	164		-315
chr3	113530416	113530828	413	+	523	utr3	ATP6V1A	2.54574	5.50643e-06	0.000312073	10	208	7	335		-412
chr3	121350277	121350760	484	-	3059	utr3	HCLS1	1.2486	0.00332089	0.0318304	34	457	46	567		-483
chr3	122481601	122482204	604	-	79663	intron	HSPBAP1	3.54979	0.003153	0.0308049	0	63	2	61		-603
chr3	126582840	126583178	339	+	84303	intron	CHCHD6	Inf	1.98638e-05	0.00089541	0	81	0	74		-338
chr3	127293621	127293898	278	-	131601	intron	TPRA1	3.17403	8.07706e-06	0.000425948	6	139	1	206		-277
chr3	127337066	127337652	587	+	4171	intron	MCM2	2.34863	0.00267196	0.027774	2	90	6	131		-586
chr3	127340707	127341192	486	+	4171	utr3	MCM2	2.46644	1.36299e-07	1.32031e-05	15	375	18	623		-485
chr3	127799823	127800100	278	-	8607	utr3	RUVBL1	2.07423	0.00260542	0.0273113	7	116	5	158		-277
chr3	127865161	127865642	482	*	NA	intergenic	NA	3.6554	0.00178444	0.0218296	0	57	2	79		-481
chr3	128049950	128050373	424	+	60678	intron	EEFSEC	3.41865	0.000646546	0.0112638	1	84	2	87		-423
chr3	128338839	128339342	504	-	6184	utr3	RPN1	1.86601	1.85136e-05	0.000849974	27	470	27	592		-503
chr3	128889018	128889319	302	-	7555	utr3	CNBP	1.31989	0.00265087	0.0276073	28	402	39	499		-301
chr3	129235502	129235714	213	+	55764	intron	IFT122	4.60441	0.000690827	0.0117872	0	52	1	80		-212
chr3	129235792	129236044	253	+	55764	intron	IFT122	2.99426	0.00643931	0.0484505	1	56	2	73		-252
chr3	133554050	133554347	298	-	51560	intron	RAB6B	4.01528	5.9294e-08	6.1822e-06	4	313	6	576		-297
chr3	138406546	138407061	516	-	5291	intron	PIK3CB	1.87709	0.00523405	0.0425703	6	128	8	148		-515
chr3	141644501	141645024	524	+	483	utr3	ATP1B3	1.60292	0.000153887	0.0041213	35	525	34	600		-523
chr3	142775199	142775707	509	+	23350	utr3	U2SURP	1.16653	0.00196233	0.0231057	70	798	94	1206		-508
chr3	152048810	152049189	380	+	4154	intron	MBNL1	1.63095	0.000704277	0.0119495	22	253	18	426		-379
chr3	156248433	156248825	393	+	7881	intron	KCNAB1	2.38173	0.000724124	0.0121058	5	121	5	161		-392
chr3	156260700	156260983	284	-	6747	utr3	SSR3	1.99553	0.000318664	0.00693411	12	195	10	282		-283
chr3	156865655	156866343	689	-	57018	utr3	CCNL1	1.31279	0.000209235	0.00518664	132	1441	129	2083		-688
chr3	158546789	158547140	352	+	64747	utr3	MFSD1	1.69665	0.00483839	0.0407066	10	158	10	191		-351
chr3	160219235	160219687	453	-	3840	utr3	KPNA4	1.56959	0.00230087	0.0254465	18	216	15	317		-452
chr3	169846596	169847276	681	-	80012	cds	PHC3	1.75087	8.24393e-06	0.000433076	60	807	35	910		-680
chr3	179305737	179306160	424	+	86	utr3	ACTL6A	1.56652	0.00633389	0.0479463	8	144	16	245		-423
chr3	179341926	179342218	293	+	4711	utr3	NDUFB5	2.10025	0.00014765	0.00398552	17	200	4	291		-292
chr3	183419598	183419923	326	+	55689	intron	YEATS2	2.63707	0.00111852	0.0160055	3	128	4	101		-325
chr3	184026535	184026805	271	+	5708	cds	PSMD2	2.38808	0.000110063	0.00322054	4	177	10	217		-270
chr3	185635085	185635454	370	-	6434	utr3	TRA2B	1.92716	7.29085e-07	5.78966e-05	52	842	41	1068		-369
chr3	186507340	186507601	262	+	1974	utr3	EIF4A2	1.19591	0.00482661	0.040639	41	398	40	614		-261
chr3	191573184	191573753	570	*	NA	intergenic	NA	1.86621	0.00541292	0.043528	9	121	5	155		-569
chr3	193412422	193412764	343	+	4976	utr3	OPA1	1.65006	0.00209841	0.0241255	15	186	13	294		-342
chr3	194831073	194831328	256	-	152002	intron	C3orf21	3.79194	4.30498e-05	0.00161202	1	90	2	136		-255
chr3	194831370	194831602	233	-	152002	intron	C3orf21	2.59745	0.00507928	0.0419225	1	67	4	97		-232
chr3	196612103	196612525	423	+	205564	cds	SENP5	1.48765	0.000468817	0.00899977	35	476	36	598		-422
chr3	196612764	196613058	295	+	205564	cds	SENP5	1.58805	0.00300608	0.0298607	16	190	13	285		-294
chr3	196613210	196613523	314	+	205564	cds	SENP5	1.78012	0.00268168	0.0278538	12	164	8	207		-313
chr3	197506549	197507045	497	+	84248	intron	FYTTD1	2.0485	0.00161533	0.0204571	10	139	4	174		-496
chr4	716659	716941	283	+	10336	intron	PCGF3	3.44623	0.00508588	0.0419225	0	52	2	65		-282
chr4	1218049	1218852	804	-	1487	intron	CTBP1	3.48884	1.85655e-20	2.53577e-17	40	1892	31	2414		-803
chr4	1220984	1221503	520	-	1487	intron	CTBP1	2.86273	2.2104e-08	2.67175e-06	12	342	8	445		-519
chr4	1310432	1310911	480	+	10296	intron	MAEA	3.68368	0.00142788	0.0188536	2	63	0	76		-479
chr4	1331124	1331683	560	+	10296	intron	MAEA	2.34274	7.67929e-07	6.04539e-05	16	395	16	479		-559
chr4	1902384	1902964	581	+	7468	cds	WHSC1	1.37994	0.000308909	0.00678333	58	821	76	1062		-580
chr4	2827091	2827348	258	+	6452	intron	SH3BP2	3.73925	1.76239e-12	5.29045e-10	6	424	7	510		-257
chr4	3230851	3231436	586	+	3064	intron	HTT	4.67266	2.1227e-14	9.06027e-12	4	374	2	451		-585
chr4	4577627	4577967	341	+	100507266	intron	LOC100507266	2.8757	0.00101718	0.0150521	3	101	2	94		-340
chr4	7029112	7029371	260	+	57533	intron	TBC1D14	2.80593	9.48065e-05	0.00290014	2	117	6	188		-259
chr4	7029406	7029712	307	+	57533	intron	TBC1D14	4.03025	1.39658e-09	2.23102e-07	1	205	5	329		-306
chr4	9549057	9549391	335	*	NA	intergenic	NA	3.9964	0.00180693	0.0219475	3	204	1	129		-334
chr4	10965280	10965843	564	*	NA	intergenic	NA	3.74418	0.000310246	0.00680723	0	74	3	147		-563
chr4	13140149	13140530	382	*	NA	intergenic	NA	2.52587	0.000806263	0.0129382	6	111	2	138		-381
chr4	17609079	17609531	453	+	51056	utr3	LAP3	1.84014	0.00402729	0.0359874	5	122	11	190		-452
chr4	19714109	19714699	591	*	NA	intergenic	NA	2.31697	0.00564503	0.0446842	4	93	3	93		-590
chr4	24529169	24529647	479	-	1665	utr3	DHX15	1.86407	2.20219e-06	0.000147444	43	743	46	1012		-478
chr4	24577884	24578284	401	-	1665	cds	DHX15	1.74498	4.5203e-06	0.000267275	65	1012	52	1087		-400
chr4	37863259	37863602	344	+	55276	utr3	PGM2	2.15212	9.90069e-05	0.00299842	12	252	9	245		-343
chr4	41977155	41977686	532	*	NA	intergenic	NA	3.83842	2.83099e-05	0.0011577	3	114	0	116		-531
chr4	48527698	48528129	432	-	285527	intron	FRYL	3.79331	2.83063e-07	2.51871e-05	4	158	1	219		-431
chr4	48557386	48557729	344	-	285527	intron	FRYL	2.24782	0.00118237	0.0166232	4	110	7	175		-343
chr4	48561859	48562401	543	-	285527	intron	FRYL	2.49372	0.00106352	0.0154451	3	115	5	126		-542
chr4	48862788	48863191	404	+	54940	utr3	OCIAD1	1.72465	0.000302565	0.0066741	19	295	21	423		-403
chr4	49217968	49218499	532	*	NA	intergenic	NA	1.96356	0.00137334	0.018345	6	159	11	198		-531
chr4	49313794	49314014	221	*	NA	intergenic	NA	2.03954	0.00233126	0.0256395	8	118	5	173		-220
chr4	49512201	49512439	239	*	NA	intergenic	NA	1.61555	0.000928831	0.0141858	19	284	20	361		-238
chr4	56770887	56771126	240	+	55763	utr3	EXOC1	3.57614	0.00271491	0.0281064	0	57	2	71		-239
chr4	57326355	57326841	487	+	10606	utr3	PAICS	2.03956	3.39401e-08	3.89556e-06	57	1215	70	1608		-486
chr4	57327184	57327455	272	+	10606	utr3	PAICS	2.26062	6.12664e-05	0.00210518	6	231	13	256		-271
chr4	65826893	65827398	506	-	401134	intron	LOC401134	1.8492	0.00298287	0.02976	7	126	10	209		-505
chr4	71685379	71686153	775	-	2926	utr3	GRSF1	1.35829	0.00586733	0.0457023	26	260	16	321		-774
chr4	79789432	79789835	404	+	55589	intron	BMP2K	1.31533	0.00116558	0.016477	48	540	49	771		-403
chr4	80169422	80170034	613	+	100505875	intron	LOC100505875	1.37787	0.00206809	0.0238876	32	435	29	407		-612
chr4	83275012	83275285	274	-	3184	utr3	HNRNPD	1.88742	2.98903e-06	0.00019167	41	624	35	905		-273
chr4	83739845	83740146	302	-	22872	utr3	SEC31A	1.45999	0.00487653	0.0408877	19	219	15	287		-301
chr4	84179190	84179629	440	*	NA	intergenic	NA	3.4697	0.00434423	0.0379505	2	62	0	56		-439
chr4	89187547	89188523	977	-	152926	intron	PPM1K	2.88237	4.00187e-10	7.75313e-08	11	478	18	682		-976
chr4	91229455	91230072	618	+	401145	cds	FAM190A	1.75935	0.000679732	0.0116635	12	219	18	334		-617
chr4	99363302	99363743	442	+	5910	utr3	RAP1GDS1	1.7423	0.00502217	0.0416992	12	150	6	174		-441
chr4	99980829	99981440	612	+	23173	intron	METAP1	2.07458	0.000246667	0.00583394	15	200	5	256		-611
chr4	100869282	100869594	313	-	3015	utr3	H2AFZ	2.19773	2.27282e-08	2.73292e-06	43	786	35	1162		-312
chr4	104067687	104068095	409	-	1062	intron	CENPE	3.59637	0.00244441	0.0263408	0	57	2	73		-408
chr4	108535190	108535458	269	-	9061	utr3	PAPSS1	2.55471	0.00137812	0.018355	4	111	3	108		-268
chr4	108955514	108955862	349	+	3033	utr3	HADH	2.11916	0.00289013	0.0291436	4	116	7	141		-348
chr4	109003508	109003812	305	-	51176	intron	LEF1	3.88565	0.000434777	0.00856912	2	72	0	88		-304
chr4	120980649	120981311	663	-	4085	utr3	MAD2L1	1.55525	0.000217749	0.00532997	39	489	33	657		-662
chr4	122589200	122589621	422	-	308	utr3	ANXA5	1.60324	0.00585954	0.0456937	5	158	18	220		-421
chr4	127365248	127365810	563	*	NA	intergenic	NA	1.69972	2.739e-05	0.00113269	44	668	38	762		-562
chr4	127502089	127502385	297	*	NA	intergenic	NA	1.83836	9.77702e-05	0.00297084	21	358	19	410		-296
chr4	139162969	139163409	441	-	23657	cds	SLC7A11	1.56546	0.00668587	0.0497118	9	181	15	199		-440
chr4	140855096	140855455	360	-	55534	intron	MAML3	3.79868	5.87468e-10	1.07744e-07	3	283	7	478		-359
chr4	142155097	142155411	315	+	27309	utr3	ZNF330	1.78502	0.00560178	0.0444837	8	117	8	184		-314
chr4	147207226	147207683	458	-	84068	intron	SLC10A7	3.32451	8.53351e-13	2.71058e-10	13	573	11	725		-457
chr4	147207860	147208199	340	-	84068	intron	SLC10A7	2.57242	1.50076e-07	1.42444e-05	12	361	14	475		-339
chr4	159630670	159630952	283	-	5481	utr3	PPID	2.59809	0.000993819	0.0148108	5	102	2	127		-282
chr4	174103827	174104198	372	+	51809	intron	GALNT7	2.56969	0.00123137	0.0170661	4	105	3	118		-371
chr4	174252915	174253323	409	-	3148	utr3	HMGB2	1.57641	5.53765e-05	0.00195442	80	1097	99	1824		-408
chr4	175412709	175413165	457	-	3248	utr3	HPGD	1.18045	0.0056166	0.0445625	46	408	34	577		-456
chr4	184633791	184634661	871	+	60684	utr3	C4orf41	1.37855	0.00616031	0.0470585	19	238	20	310		-870
chr4	185385233	185385530	298	-	3660	intron	IRF2	3.58175	0.00254404	0.026905	1	58	1	71		-297
chr4	187391110	187391568	459	-	285441	intron	LOC285441	2.31843	0.00326549	0.031454	4	109	4	103		-458
chr5	256490	256751	262	+	6389	utr3	SDHA	3.11665	9.96878e-05	0.00300669	4	115	3	220		-261
chr5	291488	291821	334	+	10016	intron	PDCD6	2.63099	5.66179e-05	0.00198796	2	181	9	181		-333
chr5	453491	454132	642	+	11336	cds	EXOC3	1.63568	0.00278359	0.0285005	13	211	14	239		-641
chr5	863938	864642	705	-	65980	utr3	BRD9	1.39195	0.0015644	0.0200726	29	404	35	501		-704
chr5	1471762	1472153	392	-	79888	intron	LPCAT1	2.35324	0.0026533	0.0276136	3	107	5	111		-391
chr5	10264814	10265097	284	+	22948	utr3	CCT5	2.83771	2.92665e-11	7.07497e-09	17	712	24	865		-283
chr5	10707596	10707876	281	-	1611	intron	DAP	3.67894	9.66506e-10	1.62976e-07	5	268	4	356		-280
chr5	14308477	14309103	627	+	7204	intron	TRIO	3.79739	1.93985e-12	5.75987e-10	7	394	5	508		-626
chr5	31526656	31526951	296	-	29102	cds	DROSHA	1.92765	0.00380847	0.0347947	7	137	7	148		-295
chr5	32601146	32601414	269	+	10923	utr3	SUB1	2.55034	2.29103e-08	2.73292e-06	17	461	17	617		-268
chr5	33467818	33468137	320	+	6897	utr3	TARS	2.12908	4.54465e-05	0.00167112	13	245	12	349		-319
chr5	37050599	37050912	314	+	25836	intron	NIPBL	3.42852	0.000565196	0.0102724	2	67	1	110		-313
chr5	41731616	41731859	244	-	5019	utr3	OXCT1	4.04203	4.48363e-06	0.000265682	3	114	0	155		-243
chr5	43704475	43704848	374	+	23530	utr3	NNT	2.51175	8.64983e-06	0.000450711	16	256	6	433		-373
chr5	43705294	43705557	264	+	23530	utr3	NNT	3.34315	1.46474e-06	0.000105019	2	142	5	247		-263
chr5	45589116	45589572	457	-	348980	intron	HCN1	2.6012	0.000998001	0.0148488	4	107	3	121		-456
chr5	60213085	60213537	453	-	1161	intron	ERCC8	2.32056	0.000281219	0.00635932	9	147	4	206		-452
chr5	68656022	68656321	300	-	6880	intron	TAF9	2.36664	0.00431725	0.0377631	3	93	4	100		-299
chr5	70952647	70953152	506	+	64087	utr3	MCCC2	2.10452	4.2548e-07	3.63214e-05	29	553	31	854		-505
chr5	70954011	70954414	404	+	64087	utr3	MCCC2	1.51501	0.00175854	0.0216485	19	292	23	354		-403
chr5	74017138	74017599	462	-	84340	utr3	GFM2	1.61604	0.00524976	0.0426555	13	171	10	209		-461
chr5	86582658	86583140	483	+	5921	intron	RASA1	2.7502	0.000360362	0.00760467	1	113	6	140		-482
chr5	86583330	86583604	275	+	5921	intron	RASA1	2.71619	0.000434295	0.0085658	4	103	3	147		-274
chr5	93018743	93019020	278	-	83989	intron	FAM172A	1.01606	0.0052846	0.0427985	126	1014	105	1532		-277
chr5	102323501	102324085	585	+	5066	intron	PAM	2.0008	0.000782367	0.0127063	13	187	5	199		-584
chr5	102538396	102538847	452	+	23262	utr3	PPIP5K2	1.37515	0.00335488	0.0319767	23	299	27	403		-451
chr5	103468963	103469478	516	*	NA	intergenic	NA	2.21066	0.000993167	0.0148108	8	121	4	182		-515
chr5	115249275	115249619	345	+	1176	utr3	AP3S1	1.57222	0.000911263	0.0140559	22	312	22	394		-344
chr5	120528265	120528778	514	*	NA	intergenic	NA	2.15751	6.77452e-06	0.000373858	16	344	17	452		-513
chr5	126171994	126172317	324	+	4001	utr3	LMNB1	1.95435	1.37747e-05	0.000662469	37	514	28	867		-323
chr5	133307742	133308403	662	-	7416	utr3	VDAC1	1.64134	2.23879e-06	0.0001488	139	2167	145	2600		-661
chr5	133493147	133493410	264	-	6500	utr3	SKP1	2.15102	1.32572e-06	9.63155e-05	24	466	20	589		-263
chr5	133892375	133892674	300	+	23338	intron	PHF15	3.59664	8.95417e-10	1.52876e-07	4	293	6	358		-299
chr5	133905599	133906366	768	+	23338	intron	PHF15	1.76789	0.00640203	0.0482839	10	140	6	152		-767
chr5	134164361	134164829	469	+	9879	utr3	DDX46	1.99208	3.33448e-06	0.00020988	29	509	26	675		-468
chr5	134260189	134260428	240	+	84105	intron	PCBD2	2.1482	3.94815e-06	0.000241279	10	357	27	534		-239
chr5	134670153	134670659	507	-	9555	utr3	H2AFY	2.09059	1.71876e-09	2.69836e-07	124	2376	104	2852		-506
chr5	134685873	134686194	322	-	9555	intron	H2AFY	1.99759	3.91457e-05	0.00149768	31	604	23	539		-321
chr5	137891104	137891267	164	-	3313	utr3	HSPA9	3.99249	7.38059e-06	0.000399239	2	106	1	154		-163
chr5	137891406	137891739	334	-	3313	utr3	HSPA9	2.82951	8.95879e-16	4.99444e-13	69	2576	86	3378		-333
chr5	138269787	138270092	306	+	1495	utr3	CTNNA1	1.87303	0.00292711	0.0293216	20	190	3	269		-305
chr5	138665096	138665649	554	+	9782	utr3	MATR3	1.67962	2.27121e-06	0.000150589	105	1579	105	2057		-553
chr5	138665798	138666062	265	+	9782	utr3	MATR3	1.4653	0.00182601	0.0220591	30	294	17	411		-264
chr5	139035030	139035297	268	+	51523	intron	CXXC5	2.42578	7.3659e-05	0.00239562	6	161	8	249		-267
chr5	139040902	139041222	321	+	51523	intron	CXXC5	2.82044	4.31474e-06	0.000259046	4	241	13	416		-320
chr5	139050100	139050512	413	+	51523	intron	CXXC5	2.57604	1.39919e-07	1.35058e-05	14	361	12	478		-412
chr5	139056114	139056481	368	+	51523	intron	CXXC5	2.03794	0.00466184	0.0397961	5	102	6	143		-367
chr5	139061939	139062193	255	+	51523	intron	CXXC5	2.4074	0.00180836	0.0219552	2	82	6	151		-254
chr5	139924098	139924647	550	*	404734	utr3*	ANKHD1-EIF4EBP3	2.10849	0.000245852	0.00582469	12	211	7	228		-549
chr5	139944666	139945019	354	+	113829	intron	SLC35A4	2.2513	0.00182591	0.0220591	4	112	6	145		-353
chr5	140053528	140053909	382	-	3035	utr3	HARS	1.88191	0.000110284	0.00322054	19	305	16	392		-381
chr5	140892563	140892868	306	*	56099	utr3*	PCDHGB7	2.76292	0.000796451	0.0128662	2	107	4	110		-305
chr5	140906492	140906782	291	-	1729	intron	DIAPH1	2.75019	3.34726e-05	0.00131375	4	159	6	204		-290
chr5	140922259	140922747	489	-	1729	intron	DIAPH1	1.57083	0.00497802	0.0414682	17	207	9	205		-488
chr5	140974712	140975090	379	-	1729	intron	DIAPH1	1.55105	0.00334246	0.0319523	16	226	15	262		-378
chr5	140997834	140998121	288	-	1729	intron	DIAPH1	2.01046	8.95013e-05	0.00278329	14	293	14	310		-287
chr5	145493485	145493866	382	-	51520	cds	LARS	1.36056	0.000608179	0.0107601	56	702	52	785		-381
chr5	145890038	145890507	470	+	10915	utr3	TCERG1	1.3577	0.000359272	0.00760467	75	841	64	1084		-469
chr5	145890631	145891026	396	+	10915	utr3	TCERG1	1.28672	0.00117044	0.0165189	62	634	49	831		-395
chr5	151200518	151200745	228	*	NA	intergenic	NA	1.95221	0.000733028	0.0122173	9	182	11	236		-227
chr5	151200952	151201322	371	*	NA	intergenic	NA	1.66808	0.000146017	0.00396102	26	436	31	540		-370
chr5	151255596	151255895	300	-	2741	intron	GLRA1	1.90575	6.44365e-05	0.00219205	21	304	16	451		-299
chr5	151260238	151260731	494	-	2741	intron	GLRA1	2.97252	3.41515e-16	2.16957e-13	55	2012	50	2425		-493
chr5	151515560	151515953	394	*	NA	intergenic	NA	1.80433	0.00010111	0.00303854	22	356	21	455		-393
chr5	151561701	151562224	524	*	NA	intergenic	NA	1.78429	0.00154835	0.0199286	12	183	11	246		-523
chr5	152045644	152046176	533	*	NA	intergenic	NA	3.17286	6.02104e-05	0.00207673	2	156	4	129		-532
chr5	153589715	153590047	333	+	55568	intron	GALNT10	3.14126	0.000122435	0.00345891	1	118	6	221		-332
chr5	154144510	154144959	450	+	23367	intron	LARP1	1.63227	0.000252435	0.00592929	25	378	29	530		-449
chr5	167999356	167999992	637	-	79646	intron	PANK3	1.80791	0.000524882	0.00978049	14	258	15	286		-636
chr5	169683105	169683377	273	-	3937	intron	LCP2	3.23612	5.04152e-11	1.12885e-08	9	480	11	529		-272
chr5	169683922	169684390	469	-	3937	intron	LCP2	1.47129	0.00200301	0.023423	23	351	23	326		-468
chr5	170411965	170412213	249	+	64901	intron	RANBP17	3.02938	0.000347393	0.00739651	2	85	3	138		-248
chr5	170837628	170837878	251	+	4869	utr3	NPM1	3.05233	6.97331e-20	8.28217e-17	182	6787	169	8965		-250
chr5	171503188	171503447	260	-	6793	intron	STK10	2.44476	0.00523615	0.0425703	3	79	3	97		-259
chr5	171516585	171516948	364	-	6793	intron	STK10	2.97203	2.29054e-08	2.73292e-06	11	351	6	362		-363
chr5	172517340	172517876	537	+	153222	cds	C5orf41	1.37929	0.00545465	0.0437349	25	276	16	295		-536
chr5	175308180	175308583	404	+	10814	utr3	CPLX2	4.01046	0.000202671	0.00505143	2	146	1	108		-403
chr5	177310889	177311165	277	+	728554	utr	LOC728554	1.6096	0.0018611	0.0222785	17	228	21	409		-276
chr5	177637611	177638152	542	-	85007	intron	AGXT2L2	1.14766	0.00141437	0.0187464	125	1294	124	1688		-541
chr5	177719848	177720622	775	-	91522	intron	COL23A1	1.56336	0.00168278	0.0209519	14	306	24	290		-774
chr5	177734948	177735207	260	-	91522	intron	COL23A1	2.29554	0.00589845	0.0458662	6	70	1	119		-259
chr5	177784839	177785115	277	-	91522	intron	COL23A1	3.03942	2.61622e-12	7.60291e-10	22	673	13	885		-276
chr5	177785228	177785721	494	-	91522	intron	COL23A1	3.40976	2.90067e-19	2.93473e-16	39	1692	28	2155		-493
chr5	177838696	177839211	516	-	91522	intron	COL23A1	1.50408	0.000806592	0.0129382	36	418	20	431		-515
chr5	177946807	177947147	341	-	91522	intron	COL23A1	3.4451	6.00186e-19	5.12353e-16	35	1562	23	1837		-340
chr5	179041460	179041799	340	-	3187	utr3	HNRNPH1	1.48687	1.19992e-05	0.000590598	216	2883	209	3535		-339
chr5	179196866	179197160	295	+	9794	intron	MAML1	3.52786	0.00334114	0.0319523	1	57	1	67		-294
chr5	179442483	179442772	290	-	55819	intron	RNF130	3.22896	1.44281e-06	0.000104268	5	180	3	225		-289
chr6	2834509	2834791	283	-	1992	intron	SERPINB1	2.93711	2.98607e-05	0.00120488	4	157	4	171		-282
chr6	4031834	4032150	317	+	8899	cds	PRPF4B	1.28803	0.000699276	0.0118837	78	754	65	1150		-316
chr6	4032671	4032966	296	+	8899	cds	PRPF4B	1.09068	0.0052045	0.0425281	77	688	58	864		-295
chr6	8079834	8080185	352	-	9521	intron.utr3	EEF1E1	1.50075	0.00575461	0.0451784	16	196	13	247		-351
chr6	13434464	13434800	337	*	NA	intergenic	NA	1.40885	0.00319213	0.0310429	25	297	21	361		-336
chr6	18225620	18225904	285	-	7913	utr3	DEK	1.47178	0.00515797	0.042359	22	247	24	455		-284
chr6	23394921	23395240	320	*	NA	intergenic	NA	1.71014	0.00211135	0.0241827	15	232	10	201		-319
chr6	26020724	26021123	400	+	8350	cds	HIST1H3A	1.83185	0.000752029	0.0124118	16	212	9	269		-399
chr6	26027188	26027485	298	-	8366	cds	HIST1H4B	2.24457	4.93599e-08	5.37888e-06	31	626	29	921		-297
chr6	26124586	26124883	298	+	8334	cds	HIST1H2AC	1.96577	1.78215e-06	0.000123248	33	566	34	860		-297
chr6	26156596	26157315	720	+	3008	cds	HIST1H1E	1.24045	0.000360948	0.00760467	158	2144	202	2415		-719
chr6	26197047	26197460	414	-	8351	cds	HIST1H3D	1.25167	0.00313092	0.030644	39	424	41	611		-413
chr6	26204899	26205186	288	+	8367	cds	HIST1H4E	2.80355	5.72603e-12	1.53351e-09	24	787	28	1190		-287
chr6	26285432	26285716	285	-	8365	cds	HIST1H4H	2.50789	1.05157e-08	1.39446e-06	21	600	20	648		-284
chr6	27115017	27115315	299	+	85235	cds	HIST1H2AH	1.3428	0.00217398	0.0246084	34	376	32	533		-298
chr6	27840988	27841258	271	-	8368	cds	HIST1H4L	2.65079	7.16332e-08	7.35641e-06	11	423	14	412		-270
chr6	29570668	29571085	418	*	NA	intergenic	NA	1.41023	0.0019479	0.023025	67	891	52	784		-417
chr6	29596073	29596389	317	*	NA	intergenic	NA	3.03802	2.14677e-06	0.000144431	14	444	5	383		-316
chr6	29599549	29599970	422	*	NA	intergenic	NA	2.632	0.00100132	0.0148866	11	296	5	226		-421
chr6	29913236	29913580	345	*	NA	intergenic	NA	1.94854	3.68223e-07	3.22396e-05	46	836	55	1289		-344
chr6	29978953	29979460	508	*	NA	intergenic	NA	2.91021	5.54877e-08	5.92093e-06	9	308	8	381		-507
chr6	30521615	30522142	528	*	NA	intergenic	NA	3.14354	0.00062694	0.0110136	2	79	2	113		-527
chr6	30653877	30654310	434	*	NA	intergenic	NA	2.1712	1.48388e-05	0.000703736	19	304	9	377		-433
chr6	30692144	30692546	403	*	NA	intergenic	NA	1.41474	7.36656e-05	0.00239562	94	1295	134	2019		-402
chr6	31654775	31655055	281	*	NA	intergenic	NA	1.76137	0.00541737	0.043551	5	122	12	192		-280
chr6	31693429	31694007	579	*	NA	intergenic	NA	1.56117	4.26928e-06	0.000257448	179	2657	224	3799		-578
chr6	31720688	31721096	409	*	NA	intergenic	NA	1.24461	0.00611765	0.0469031	37	352	23	413		-408
chr6	32148058	32148516	459	*	NA	intergenic	NA	2.40945	0.000138108	0.00380633	8	136	5	244		-458
chr6	32153712	32153977	266	*	NA	intergenic	NA	1.84405	0.000370847	0.00772725	14	247	15	315		-265
chr6	32156735	32157350	616	*	NA	intergenic	NA	2.81013	1.29424e-10	2.74067e-08	19	629	18	769		-615
chr6	33372061	33372451	391	*	NA	intergenic	NA	2.01119	0.00206713	0.0238876	9	122	5	186		-390
chr6	33392763	33393333	571	*	NA	intergenic	NA	2.98859	0.00166109	0.0207912	2	77	2	94		-570
chr6	35277648	35277964	317	+	50619	intron	DEF6	2.91002	6.81453e-06	0.000375307	4	184	6	220		-316
chr6	36569760	36570027	268	+	6428	utr3	SRSF3	2.68429	1.20395e-09	1.94174e-07	19	544	18	745		-267
chr6	36570275	36570536	262	+	6428	utr3	SRSF3	1.30554	0.00597513	0.0461864	27	280	22	376		-261
chr6	38643801	38644438	638	-	2739	utr3	GLO1	1.2971	0.00226316	0.0251832	32	398	47	664		-637
chr6	38644771	38645088	318	-	2739	utr3	GLO1	2.17345	1.44916e-05	0.00069087	13	269	15	420		-317
chr6	41499908	41500368	461	*	NA	intergenic	NA	2.72591	2.14689e-05	0.000948976	4	174	7	218		-460
chr6	42851807	42852147	341	+	285855	intron	RPL7L1	2.60529	0.000486838	0.00922897	3	130	5	129		-340
chr6	42924195	42924469	275	*	NA	intergenic	NA	1.39996	0.00523016	0.0425703	19	234	20	324		-274
chr6	42995482	42995746	265	+	88745	intron	RRP36	3.23547	0.00186806	0.0223326	1	64	2	89		-264
chr6	43469484	43469876	393	+	93643	intron	TJAP1	2.55501	0.00280814	0.0286445	3	81	3	110		-392
chr6	44221334	44221584	251	+	3326	utr3	HSP90AB1	3.9359	3.19915e-31	4.36956e-27	145	11432	179	15404		-250
chr6	52128885	52129382	498	-	4172	utr3	MCM3	2.37081	0.00203088	0.0236276	130	2581	152	5501		-497
chr6	53181161	53181581	421	-	60481	intron	ELOVL5	2.43581	3.30328e-06	0.000208397	10	288	12	353		-420
chr6	53202547	53202884	338	-	60481	intron	ELOVL5	1.94074	0.00440267	0.0382409	7	104	6	169		-337
chr6	68592542	68593189	648	*	NA	intergenic	NA	2.43735	1.28156e-13	5.00121e-11	283	7139	280	9348		-647
chr6	68594386	68594652	267	*	NA	intergenic	NA	1.38807	0.000296007	0.00661163	63	789	67	1052		-266
chr6	68594806	68594994	189	*	NA	intergenic	NA	2.30136	1.05635e-06	7.88517e-05	18	376	15	505		-188
chr6	68595095	68595377	283	*	NA	intergenic	NA	2.11216	6.14509e-09	8.52109e-07	67	1496	75	1808		-282
chr6	68595576	68595878	303	*	NA	intergenic	NA	1.93316	5.79016e-08	6.13062e-06	80	1656	103	2115		-302
chr6	68595997	68596197	201	*	NA	intergenic	NA	1.79526	2.80444e-05	0.00115028	31	517	29	602		-200
chr6	68596400	68596699	300	*	NA	intergenic	NA	2.0745	4.44435e-08	4.93521e-06	48	1035	56	1330		-299
chr6	73795883	73796224	342	+	56479	intron	KCNQ5	3.25513	0.0017427	0.0215194	1	82	2	69		-341
chr6	74227208	74227430	223	-	1915	utr3	EEF1A1	3.42882	1.88437e-22	5.14753e-19	66	3957	77	4281		-222
chr6	84669600	84670044	445	+	51167	utr3	CYB5R4	2.3149	0.00581731	0.0455083	1	84	6	103		-444
chr6	90353011	90353311	301	-	23195	utr3*	MDN1	1.51993	0.00282653	0.0287653	19	222	16	324		-300
chr6	106459786	106460357	572	*	NA	intergenic	NA	3.03212	0.000966907	0.0145206	6	93	0	179		-571
chr6	108192724	108193016	293	-	11231	utr3	SEC63	1.74401	0.0043245	0.0378014	8	169	11	170		-292
chr6	109200209	109200634	426	+	84071	intron	ARMC2	2.8884	4.66553e-05	0.00171004	2	132	6	189		-425
chr6	114261940	114262208	269	-	3066	utr3	HDAC2	2.44932	2.10767e-08	2.57032e-06	23	511	19	736		-268
chr6	122765884	122766162	279	-	57515	utr3	SERINC1	1.9029	0.00415183	0.0367636	3	167	18	260		-278
chr6	131180977	131181279	303	-	2037	intron	EPB41L2	2.45622	0.00500031	0.0415941	2	80	4	97		-302
chr6	131277140	131277620	481	-	2037	cds	EPB41L2	1.1298	0.00612116	0.0469169	41	487	57	675		-480
chr6	135285811	135286414	604	-	10767	utr3	HBS1L	1.35511	0.00327434	0.0314856	27	276	26	467		-603
chr6	139232704	139233015	312	-	85021	intron	REPS1	2.42519	0.00311006	0.0305776	3	101	4	99		-311
chr6	143129509	143129866	358	-	3097	intron	HIVEP2	3.38291	0.00079844	0.0128754	1	77	2	91		-357
chr6	146209769	146210087	319	-	257218	intron	SHPRH	2.26081	0.00460467	0.0395223	2	97	6	108		-318
chr6	147632853	147633352	500	+	134957	intron	STXBP5	1.60219	0.00107077	0.015501	26	430	24	373		-499
chr6	147669247	147669680	434	+	134957	intron	STXBP5	2.07332	3.19412e-05	0.00127378	19	348	11	323		-433
chr6	148428991	148429398	408	*	NA	intergenic	NA	2.85729	0.00349901	0.0328688	2	75	2	80		-407
chr6	149707102	149707790	689	+	23118	intron	TAB2	1.80206	0.00427765	0.0375165	9	158	8	158		-688
chr6	150131780	150132102	323	+	5110	utr3	PCMT1	1.50567	0.0060974	0.0468136	15	182	13	249		-322
chr6	151422661	151422941	281	+	25902	utr3	MTHFD1L	2.37011	0.000773248	0.0126037	6	116	4	165		-280
chr6	153301402	153301751	350	-	26271	intron	FBXO5	3.29293	4.66996e-05	0.00171004	2	130	3	131		-349
chr6	157234836	157235275	440	+	57492	intron	ARID1B	2.5441	2.53977e-06	0.000166744	11	262	8	337		-439
chr6	157971256	157971601	346	+	79683	intron	ZDHHC14	2.5036	0.000278684	0.00632294	4	113	6	198		-345
chr6	158051546	158052061	516	+	79683	intron	ZDHHC14	3.46435	3.90708e-12	1.10031e-09	34	1400	28	2350		-515
chr6	158291104	158291368	265	+	51429	intron	SNX9	3.17888	3.04713e-06	0.000194938	3	161	6	286		-264
chr6	158291540	158291866	327	+	51429	intron	SNX9	4.38566	6.03134e-06	0.000338748	3	155	1	308		-326
chr6	158474605	158475280	676	+	8871	intron	SYNJ2	3.18837	3.67419e-13	1.2546e-10	15	681	17	896		-675
chr6	159047840	159048225	386	+	57583	intron	TMEM181	3.93935	4.8039e-22	9.37343e-19	22	1224	15	1873		-385
chr6	159187466	159187989	524	-	7430	utr3	EZR	1.97668	4.10849e-05	0.0015539	18	347	17	392		-523
chr6	160199971	160200267	297	-	6950	cds	TCP1	1.7775	1.34124e-05	0.000648472	38	621	38	785		-296
chr6	161604848	161605505	658	-	56895	intron	AGPAT4	1.8164	0.00213564	0.0243588	7	170	13	209		-657
chr6	161615475	161615770	296	-	56895	intron	AGPAT4	4.32618	3.90587e-07	3.39069e-05	1	301	7	581		-295
chr6	170037593	170038011	419	-	253769	intron	WDR27	2.59975	6.76729e-05	0.00226825	7	152	4	210		-418
chr6	170167597	170167925	329	+	55780	intron	C6orf70	3.63623	5.18685e-08	5.60037e-06	9	343	5	615		-328
chr6	170626534	170626924	391	+	84498	cds	FAM120B	1.73814	0.000225828	0.00547864	22	356	20	395		-390
chr6	170627551	170627858	308	+	84498	cds	FAM120B	1.76103	0.000401719	0.00811233	18	254	16	373		-307
chr7	695849	696209	361	-	5575	intron	PRKAR1B	4.33227	0.00263726	0.0275706	1	45	0	65		-360
chr7	696280	696622	343	-	5575	intron	PRKAR1B	2.47002	0.0044798	0.0387139	4	78	2	102		-342
chr7	917138	917378	241	+	51608	intron	GET4	3.06801	0.00104627	0.0153479	1	78	3	103		-240
chr7	1926926	1927550	625	-	8379	intron	MAD1L1	2.3733	2.72076e-07	2.42886e-05	13	429	22	549		-624
chr7	1927782	1928069	288	-	8379	intron	MAD1L1	2.20879	0.00242004	0.0262397	4	111	6	138		-287
chr7	1928167	1928420	254	-	8379	intron	MAD1L1	2.92062	0.00245335	0.0263955	2	74	2	89		-253
chr7	2098844	2099265	422	-	8379	intron	MAD1L1	2.62244	0.000849081	0.0133385	3	92	4	143		-421
chr7	2121493	2122028	536	-	8379	intron	MAD1L1	4.31109	0.00292692	0.0293216	1	46	0	62		-535
chr7	2419917	2420301	385	+	8662	utr3	EIF3B	1.3436	0.00477434	0.0403529	23	287	25	371		-384
chr7	5350523	5350887	365	-	84629	intron	TNRC18	2.54917	0.00011603	0.00331895	4	174	7	168		-364
chr7	5566866	5567366	501	-	60	utr3	ACTB	1.97996	1.65103e-09	2.607e-07	733	13371	868	21097		-500
chr7	11179645	11179957	313	*	NA	intergenic	NA	3.87542	2.24099e-05	0.000982617	1	114	2	121		-312
chr7	12423934	12424234	301	-	221806	intron	VWDE	2.91532	1.46768e-05	0.000698477	2	138	7	233		-300
chr7	16745715	16746087	373	+	28969	utr3	BZW2	1.8796	2.15805e-05	0.000952364	21	380	29	626		-372
chr7	25162516	25163172	657	-	54205	utr3	CYCS	1.85323	8.82772e-07	6.79287e-05	58	1070	61	1239		-656
chr7	26231502	26231882	381	-	3181	utr3	HNRNPA2B1	2.31906	1.44627e-12	4.38975e-10	333	7890	336	10140		-380
chr7	26251857	26252139	283	+	11335	utr3	CBX3	2.02652	1.69904e-05	0.000792024	18	344	19	473		-282
chr7	32567441	32567848	408	+	23080	intron	AVL9	2.77634	0.00527307	0.0427558	1	59	3	90		-407
chr7	35157723	35157998	276	*	NA	intergenic	NA	3.2891	2.28724e-07	2.06206e-05	2	186	7	293		-275
chr7	35354774	35355330	557	+	401324	intron	LOC401324	2.98261	6.45944e-09	8.86696e-07	8	386	11	417		-556
chr7	35943901	35944360	460	+	989	utr3	2014-09-07	1.79902	0.00115706	0.0164311	14	191	10	262		-459
chr7	38765458	38765913	456	-	27072	utr3	VPS41	2.04608	0.00438571	0.0381665	6	101	5	146		-455
chr7	44498304	44498717	414	-	23386	intron	NUDCD3	2.76672	0.00564228	0.0446754	1	67	3	79		-413
chr7	44840971	44841213	243	+	5478	utr3	PPIA	1.2824	0.00264108	0.0275836	34	430	43	584		-242
chr7	44873855	44874117	263	-	94239	intron.utr3	H2AFV	1.81667	0.00250919	0.0266499	7	193	20	327		-262
chr7	50681536	50682006	471	-	2887	intron	GRB10	2.01315	0.00544418	0.043702	7	114	4	124		-470
chr7	56130772	56131063	292	+	908	utr3	CCT6A	2.50894	1.12157e-07	1.10801e-05	16	356	14	578		-291
chr7	56131283	56131632	350	+	908	utr3	CCT6A	1.77778	0.000451539	0.00879742	16	262	16	330		-349
chr7	56169300	56169551	252	-	51142	utr3	CHCHD2	1.55846	0.00164256	0.0206203	16	252	22	355		-251
chr7	64145483	64145885	403	+	51427	intron	ZNF107	2.17684	0.000860447	0.013439	10	128	3	193		-402
chr7	76188666	76188951	286	+	100133091	intron	LOC100133091	2.30393	0.000217529	0.00532937	9	159	5	216		-285
chr7	76189125	76189376	252	+	100133091	intron	LOC100133091	2.93706	2.21187e-06	0.00014773	5	194	6	262		-251
chr7	95750094	95750656	563	-	10165	utr3	SLC25A13	2.51145	0.00378006	0.0345851	0	80	6	104		-562
chr7	98544027	98544321	295	+	8295	intron	TRRAP	3.71571	7.13275e-07	5.69723e-05	3	156	2	199		-294
chr7	98593339	98593844	506	+	8295	intron	TRRAP	3.41776	3.95768e-08	4.48598e-06	7	219	2	304		-505
chr7	98740357	98740765	409	-	57154	intron	SMURF1	3.30254	0.000214291	0.00527843	3	113	1	96		-408
chr7	101859881	101860180	300	+	1523	intron	CUX1	3.23021	0.00035371	0.0075193	1	77	3	128		-299
chr7	102615084	102615504	421	-	222235	intron	FBXL13	2.57644	0.000575068	0.0103965	6	127	2	128		-420
chr7	102616833	102617402	570	-	222235	intron	FBXL13	3.71513	1.45072e-08	1.86862e-06	5	220	2	277		-569
chr7	102800489	102800699	211	*	NA	intergenic	NA	2.17354	0.00356875	0.0333063	2	116	11	205		-210
chr7	102801095	102801406	312	*	NA	intergenic	NA	3.42316	1.17076e-08	1.53758e-06	3	229	7	355		-311
chr7	105891248	105891567	320	-	10135	utr3	NAMPT	1.8716	0.00169479	0.021063	11	172	8	202		-319
chr7	107559744	107560223	480	+	1738	utr3	DLD	1.92074	7.69147e-06	0.000409567	24	448	32	709		-479
chr7	115607296	115607730	435	-	22797	intron	TFEC	3.82567	0.000708566	0.0119838	0	81	2	68		-434
chr7	123181678	123182180	503	-	4698	utr3	NDUFA5	1.53536	0.00261372	0.0273874	16	251	19	294		-502
chr7	137576698	137577056	359	-	64764	intron	CREB3L2	3.71803	0.00123779	0.0171203	1	67	1	74		-358
chr7	138765813	138766088	276	-	56829	intron	ZC3HAV1	2.47601	0.00113863	0.0162423	7	115	1	124		-275
chr7	149497977	149498476	500	+	23145	intron	SSPO	3.92312	6.70274e-09	9.15494e-07	2	239	4	246		-499
chr7	150646559	150647086	528	-	3757	intron.utr3	KCNH2	1.42738	0.00239302	0.0260577	25	286	23	416		-527
chr7	155463163	155463444	282	+	155435	intron	RBM33	1.45607	0.000582183	0.0104491	38	512	36	577		-281
chr7	156506615	156507122	508	-	64327	intron	LMBR1	1.96255	0.00177399	0.0217738	7	154	9	181		-507
chr7	158402036	158402250	215	*	NA	intergenic	NA	Inf	0.000412642	0.00826613	0	42	0	72		-214
chr7	158402296	158402608	313	*	NA	intergenic	NA	2.92473	5.70862e-07	4.66893e-05	9	251	4	279		-312
chr7	158573790	158574287	498	-	57488	intron	ESYT2	2.78921	1.76953e-08	2.23788e-06	16	407	7	446		-497
chr7	158574367	158574652	286	-	57488	intron	ESYT2	2.8351	7.57429e-05	0.00243219	4	153	4	151		-285
chr7	158574846	158575247	402	-	57488	intron	ESYT2	3.20055	1.40259e-08	1.82451e-06	9	315	4	324		-401
chr7	158686424	158686926	503	+	55112	intron	WDR60	3.49389	7.30544e-06	0.000397535	3	148	2	153		-502
chr8	6301918	6302381	464	+	79648	cds	MCPH1	1.32904	0.00330933	0.0317419	30	320	28	473		-463
chr8	6459050	6459308	259	+	79648	intron	MCPH1	2.81935	8.63339e-05	0.00270457	2	130	6	175		-258
chr8	12443345	12443678	334	*	NA	intergenic	NA	3.37506	9.76627e-10	1.63672e-07	8	337	5	388		-333
chr8	23075427	23075729	303	-	8797	intron	TNFRSF10A	4.25326	0.00376817	0.034542	1	39	0	66		-302
chr8	24180612	24181104	493	+	10863	intron	ADAM28	2.45691	0.00475306	0.0402229	3	65	3	116		-492
chr8	28320681	28320990	310	-	157574	intron	FBXO16	4.55824	0.000817102	0.0130272	1	47	0	83		-309
chr8	38775807	38776119	313	+	59339	intron	PLEKHA2	2.33222	0.00171893	0.0212953	5	111	4	133		-312
chr8	41602726	41603097	372	-	286	intron	ANK1	1.84931	0.00460856	0.0395223	9	112	6	184		-371
chr8	42262968	42263346	379	+	7419	utr3	VDAC3	2.35382	2.49883e-08	2.96785e-06	23	584	28	831		-378
chr8	42940339	42940871	533	+	2339	utr3	FNTA	1.33159	0.00436135	0.0380271	27	326	25	377		-532
chr8	48685775	48686055	281	-	5591	utr3	PRKDC	1.71384	0.000285864	0.00644834	16	318	26	427		-280
chr8	48686305	48686652	348	-	5591	utr3	PRKDC	2.45192	6.78518e-10	1.20358e-07	32	789	35	1209		-347
chr8	48843524	48843984	461	-	5591	intron	PRKDC	1.94612	0.00254785	0.0269244	8	142	7	169		-460
chr8	48973705	48974111	407	+	7336	utr3	UBE2V2	1.65382	0.0061515	0.0470098	14	143	6	199		-406
chr8	55190875	55191376	502	*	NA	intergenic	NA	3.47325	4.21397e-06	0.000255239	5	315	10	602		-501
chr8	56895398	56895945	548	+	4067	intron	LYN	2.35535	1.58219e-06	0.000112205	14	313	14	467		-547
chr8	62577076	62577350	275	-	444	intron.utr3	ASPH	3.39675	0.00619591	0.047238	1	53	1	60		-274
chr8	82734369	82734919	551	-	64089	intron	SNX16	2.06178	0.00273594	0.0282183	8	102	4	173		-550
chr8	91484548	91484835	288	*	NA	intergenic	NA	1.89674	0.000936113	0.0142195	10	190	11	231		-287
chr8	91486633	91486966	334	*	NA	intergenic	NA	2.29872	2.95127e-05	0.00119271	12	262	8	263		-333
chr8	97274777	97275280	504	+	9791	intron	PTDSS1	2.70653	0.001169	0.0165116	1	100	5	109		-503
chr8	98864202	98864635	434	+	55353	utr3	LAPTM4B	2.43316	2.28766e-09	3.47177e-07	18	797	42	942		-433
chr8	99114640	99115055	416	-	10247	utr3	HRSP12	2.75332	0.00219261	0.0247298	0	76	5	106		-415
chr8	101931135	101931491	357	-	7534	utr3	YWHAZ	1.10513	0.00467235	0.0398484	62	694	73	872		-356
chr8	101932513	101932884	372	-	7534	utr3	YWHAZ	1.6723	3.05686e-05	0.001228	36	598	51	912		-371
chr8	125524699	125525187	489	-	83940	intron	TATDN1	2.03473	0.00130505	0.0177984	10	135	5	200		-488
chr8	125700403	125700672	270	-	9788	intron	MTSS1	4.26524	0.000165632	0.00435183	40	1877	20	4569		-269
chr8	129948615	129949130	516	*	NA	intergenic	NA	2.24055	4.13274e-05	0.00155931	6	242	15	291		-515
chr8	130002425	130002695	271	*	NA	intergenic	NA	1.80177	0.0022282	0.0249765	15	159	5	220		-270
chr8	130017465	130017876	412	*	NA	intergenic	NA	1.71342	0.000793153	0.0128509	14	233	18	337		-411
chr8	130161915	130162413	499	*	NA	intergenic	NA	1.80362	0.000201139	0.00501781	15	330	22	361		-498
chr8	130224524	130224871	348	*	NA	intergenic	NA	1.65967	0.00452082	0.0389575	11	166	11	209		-347
chr8	130393476	130393726	251	*	NA	intergenic	NA	2.48802	7.83742e-05	0.00249819	26	463	17	867		-250
chr8	130463897	130464398	502	*	NA	intergenic	NA	2.22353	1.11146e-08	1.46676e-06	53	1272	77	2043		-501
chr8	131086353	131086644	292	-	50807	intron	ASAP1	3.10545	0.00387832	0.0351507	0	64	3	74		-291
chr8	137574702	137575067	366	*	NA	intergenic	NA	2.16143	0.00141204	0.0187247	7	111	5	183		-365
chr8	138296436	138296919	484	*	NA	intergenic	NA	2.57546	0.00249579	0.0265696	2	123	5	96		-483
chr8	140776059	140776601	543	-	83696	intron	TRAPPC9	2.02709	0.000792993	0.0128509	8	135	9	246		-542
chr8	140793741	140794076	336	-	83696	intron	TRAPPC9	4.09558	0.000102932	0.00306966	2	71	0	117		-335
chr8	140815085	140815443	359	-	83696	intron	TRAPPC9	3.162	5.06841e-12	1.38454e-09	16	671	20	1090		-358
chr8	140884090	140884589	500	-	83696	intron	TRAPPC9	3.74941	1.18292e-07	1.16237e-05	16	998	23	1890		-499
chr8	140884714	140884888	175	-	83696	intron	TRAPPC9	3.14002	0.00326152	0.03144	0	67	3	74		-174
chr8	141282043	141282312	270	-	83696	intron	TRAPPC9	3.97295	4.79958e-07	4.02178e-05	1	129	3	214		-269
chr8	141282378	141282584	207	-	83696	intron	TRAPPC9	3.20225	0.00486269	0.0408461	1	48	2	105		-206
chr8	141414775	141415033	259	-	83696	intron	TRAPPC9	4.33278	0.00260465	0.0273113	1	41	0	70		-258
chr8	141561742	141562056	315	-	27161	intron	EIF2C2	2.90558	1.85671e-08	2.33572e-06	11	293	8	487		-314
chr8	141895698	141896549	852	-	5747	intron	PTK2	1.30608	0.00312994	0.030644	38	343	26	520		-851
chr8	142262935	142263133	199	*	NA	intergenic	NA	4.53138	0.000972046	0.0145738	1	57	0	68		-198
chr8	142279563	142279888	326	*	NA	intergenic	NA	3.13714	1.44676e-08	1.86862e-06	10	265	4	408		-325
chr8	143364000	143364402	403	-	203062	intron	TSNARE1	2.05167	0.000679615	0.0116635	10	175	7	204		-402
chr8	143364758	143365079	322	-	203062	intron	TSNARE1	1.73675	0.00311537	0.0305913	13	180	8	195		-321
chr8	143366448	143366770	323	-	203062	intron	TSNARE1	3.27142	1.45652e-06	0.000104705	7	157	1	268		-322
chr8	143394454	143395054	601	-	203062	intron	TSNARE1	3.83425	5.06331e-16	3.07365e-13	22	958	10	1541		-600
chr8	144620798	144621442	645	-	23144	cds	ZC3H3	1.39701	0.0022016	0.0247817	21	327	34	458		-644
chr9	15465159	15465506	348	-	11168	utr3	PSIP1	1.80375	0.00617437	0.0471264	7	106	8	181		-347
chr9	19115832	19116262	431	-	123	utr3	PLIN2	2.71827	0.00105604	0.0153994	2	97	4	115		-430
chr9	32450250	32450771	522	+	48	utr3	ACO1	1.70603	0.0032166	0.031181	9	150	13	242		-521
chr9	33038883	33039356	474	+	3301	utr3*	DNAJA1	2.069	3.87966e-06	0.000237625	19	388	25	620		-473
chr9	33265281	33265604	324	+	51510	intron	CHMP5	4.25386	3.27916e-05	0.00129259	1	78	1	131		-323
chr9	35056537	35056772	236	-	7415	utr3	VCP	2.61605	5.88621e-08	6.16067e-06	9	368	18	530		-235
chr9	35697388	35697884	497	-	7094	utr3	TLN1	1.26483	0.00244063	0.0263312	27	481	60	649		-496
chr9	35730135	35730663	529	-	7094	intron	TLN1	3.49289	4.14542e-10	7.97467e-08	5	311	7	420		-528
chr9	36211768	36212028	261	+	1211	utr3	CLTA	2.95095	8.69377e-07	6.72178e-05	6	220	6	281		-260
chr9	72953184	72953788	605	+	23137	intron	SMC5	3.33955	0.000164048	0.00432571	1	92	3	127		-604
chr9	80934960	80935347	388	+	29968	intron	PSAT1	3.93021	1.39104e-13	5.35196e-11	9	410	3	586		-387
chr9	86034371	86034630	260	-	257019	intron	FRMD3	3.0308	4.55437e-06	0.000268708	3	172	6	225		-259
chr9	86137928	86138253	326	-	257019	intron	FRMD3	3.14543	0.00293307	0.0293705	2	57	1	88		-325
chr9	86583874	86584243	370	-	3190	utr3	HNRNPK	2.96239	2.38298e-15	1.22822e-12	38	1604	47	1963		-369
chr9	90026726	90027171	446	*	NA	intergenic	NA	2.61784	0.0046289	0.0396077	3	89	2	73		-445
chr9	91985165	91985569	405	-	10507	intron	SEMA4D	3.1475	0.000650246	0.0113067	1	96	3	92		-404
chr9	92099420	92099811	392	*	NA	intergenic	NA	4.14186	2.62451e-05	0.00109623	4	131	0	261		-391
chr9	94972681	94973133	453	-	3376	utr3	IARS	2.33141	2.27404e-09	3.47039e-07	36	846	42	1293		-452
chr9	96411909	96412601	693	+	5253	intron	PHF2	5.70738	7.08356e-13	2.27649e-10	1	232	1	336		-692
chr9	97521966	97522827	862	+	84909	cds	C9orf3	1.64703	0.000270462	0.00619641	18	358	33	508		-861
chr9	97845579	97845971	393	+	84909	intron	C9orf3	2.25023	0.00115788	0.0164311	4	108	7	178		-392
chr9	99699781	99700034	254	+	441457	intron	FAM22G	2.97291	0.000168796	0.00441244	1	101	5	155		-253
chr9	100777651	100778068	418	+	10541	utr3	ANP32B	1.45768	0.000231562	0.00557319	41	599	62	944		-417
chr9	111630971	111631367	397	-	8518	utr3	IKBKAP	1.97017	0.00508511	0.0419225	7	116	5	137		-396
chr9	130880869	130881260	392	-	80142	utr3*	PTGES2	2.54462	2.0163e-05	0.000905908	15	345	6	305		-391
chr9	132252570	132252935	366	+	100506190	intron	LOC100506190	2.99967	1.03692e-07	1.03001e-05	9	255	5	353		-365
chr9	133917635	133918337	703	+	10319	intron	LAMC3	2.85565	6.23667e-10	1.13578e-07	19	532	10	595		-702
chr9	134391008	134391174	167	+	10585	intron	POMT1	4.37128	0.00228256	0.0253466	1	63	0	46		-166
chr9	134391291	134391486	196	+	10585	intron	POMT1	4.13989	7.57356e-05	0.00243219	2	81	0	111		-195
chr9	134391605	134391786	182	+	10585	intron	POMT1	2.76617	0.00194313	0.0229785	4	90	1	92		-181
chr9	135252936	135253345	410	-	7270	intron	TTF1	2.20982	0.000713081	0.0120193	6	145	7	179		-409
chr9	135253542	135253898	357	-	7270	intron	TTF1	2.95018	0.000190116	0.00481763	5	111	1	140		-356
chr9	135469734	135470499	766	-	64794	utr3	DDX31	1.41452	0.00187183	0.0223402	24	327	31	469		-765
chr9	135865532	135865937	406	+	8328	intron	GFI1B	3.50885	9.63725e-10	1.62976e-07	6	286	5	393		-405
chr9	135894816	135895056	241	*	NA	intergenic	NA	1.48852	1.96074e-05	0.000886779	145	2050	147	2348		-240
chr9	136130029	136130240	212	*	NA	intergenic	NA	2.84227	2.58125e-05	0.00108983	22	530	17	1013		-211
chr9	136130375	136130660	286	-	28	utr3*	ABO	3.12449	3.75133e-09	5.33725e-07	42	1280	31	2215		-285
chr9	136657073	136657673	601	-	7410	intron	VAV2	3.56665	1.41298e-11	3.67604e-09	9	435	5	452		-600
chr9	136716842	136717434	593	-	7410	intron	VAV2	2.95995	2.34294e-05	0.00101627	5	154	3	181		-592
chr9	136736165	136736599	435	-	7410	intron	VAV2	4.92099	9.05682e-05	0.00280505	1	82	0	80		-434
chr9	136798625	136799147	523	-	7410	intron	VAV2	3.71868	5.4797e-10	1.01829e-07	4	295	5	341		-522
chr9	136802347	136802639	293	-	7410	intron	VAV2	4.40247	2.11338e-09	3.26166e-07	3	192	1	268		-292
chr9	137983296	137983707	412	+	10439	intron	OLFM1	3.3785	8.41111e-15	3.96149e-12	20	720	11	1034		-411
chr9	138915892	138916389	498	-	138151	intron	NACC2	3.33595	1.05103e-08	1.39446e-06	9	465	14	808		-497
chr9	139317703	139318150	448	+	23203	utr3	PMPCA	1.32382	0.00625425	0.0475322	26	245	19	369		-447
chr9	140562788	140563071	284	+	79813	intron	EHMT1	3.69967	7.29299e-06	0.000397535	3	108	1	177		-283
chr9	140563774	140564010	237	+	79813	intron	EHMT1	2.5812	5.18088e-08	5.60037e-06	19	418	10	519		-236
chr10	1056671	1056978	308	+	23560	intron	GTPBP4	2.54254	0.000110987	0.00322318	8	143	3	206		-307
chr10	1153501	1153961	461	+	22884	intron	WDR37	2.52559	0.000235663	0.00565144	7	143	3	167		-460
chr10	5749644	5749891	248	+	54906	intron	C10orf18	2.42447	0.00153695	0.0198229	6	83	2	154		-247
chr10	5807215	5807472	258	-	2665	utr3	GDI2	2.75655	0.000138573	0.00380633	5	121	3	173		-257
chr10	5807673	5808040	368	-	2665	utr3	GDI2	1.61108	0.000831665	0.0131626	16	303	25	371		-367
chr10	6301094	6301533	440	*	NA	intergenic	NA	4.54906	0.000929032	0.0141858	0	46	1	82		-439
chr10	6611729	6612308	580	-	5588	intron	PRKCQ	2.21221	0.00376503	0.0345248	2	101	7	123		-579
chr10	17279264	17279536	273	+	7431	utr3	VIM	1.65786	6.90558e-05	0.00230082	37	513	35	720		-272
chr10	17422718	17422978	261	-	338596	intron	ST8SIA6	3.09564	0.000118603	0.00337488	5	159	5	313		-260
chr10	17563502	17563793	292	*	NA	intergenic	NA	3.54459	0.00299695	0.0298222	1	47	1	81		-291
chr10	18940064	18940440	377	-	221078	utr5	NSUN6	1.64267	0.00590829	0.0458774	13	170	8	181		-376
chr10	27400660	27401006	347	-	10730	utr3	YME1L1	1.8151	2.47938e-05	0.00106159	33	487	25	615		-346
chr10	49928406	49928724	319	+	57705	intron	WDFY4	3.86163	0.000531525	0.0098706	1	73	1	83		-318
chr10	50017267	50017696	430	+	57705	intron	WDFY4	2.92046	3.43895e-05	0.00134011	5	158	3	166		-429
chr10	69556483	69556906	424	-	56521	utr3	DNAJC12	2.42702	0.00593126	0.0459773	1	79	5	94		-423
chr10	70101786	70102033	248	+	3189	utr3	HNRNPH3	1.36466	0.00397154	0.0357112	23	269	25	404		-247
chr10	71161371	71161601	231	+	3098	utr3	HK1	1.93098	0.00216981	0.0245945	6	132	10	200		-230
chr10	71962630	71962906	277	-	5464	utr3	PPA1	3.0708	8.34886e-10	1.45265e-07	8	354	12	563		-276
chr10	72464204	72464717	514	+	140766	intron	ADAMTS14	2.76588	3.52711e-06	0.000219476	9	182	4	303		-513
chr10	73055833	73056158	326	+	219699	intron	UNC5B	2.93847	0.00275845	0.0283336	3	56	1	114		-325
chr10	76990854	76991161	308	+	7417	utr3	VDAC2	3.14711	0.00303602	0.0300568	1	64	2	79		-307
chr10	82280289	82280666	378	+	81619	utr3	TSPAN14	2.30367	0.000150836	0.00405951	7	166	8	236		-377
chr10	85912090	85912847	758	+	27069	utr3	GHITM	2.88492	5.44095e-11	1.20838e-08	16	568	19	838		-757
chr10	87387809	87388153	345	-	2894	intron	GRID1	3.84396	0.000575665	0.0104004	1	60	1	97		-344
chr10	88992792	88993029	238	+	728118	intron	FAM22A	2.97328	0.0018195	0.0220121	2	77	2	92		-237
chr10	94110893	94111460	568	+	54708	utr3	2014-03-05	2.74356	0.00217464	0.0246084	3	71	2	112		-567
chr10	100983458	100983754	297	-	60495	intron	HPSE2	1.9795	0.00350969	0.0329239	7	117	6	161		-296
chr10	102760849	102761243	395	+	84445	intron	LZTS2	3.01852	0.00137281	0.018345	3	83	1	91		-394
chr10	103594620	103594941	322	-	30819	intron	KCNIP2	2.92041	0.00232329	0.0256322	3	59	1	108		-321
chr10	103922041	103922309	269	+	9221	utr3	NOLC1	2.62698	2.1519e-06	0.000144431	10	236	9	408		-268
chr10	103922850	103923506	657	+	9221	utr3	NOLC1	1.29096	0.00246218	0.0264248	37	403	39	610		-656
chr10	105380573	105380914	342	-	9644	intron	SH3PXD2A	4.91379	0.000102507	0.00306409	0	71	1	91		-341
chr10	112657960	112658397	438	+	27250	utr3	PDCD4	2.40675	3.62933e-06	0.000225324	14	496	32	838		-437
chr10	114190123	114190610	488	-	64429	utr3	ZDHHC6	1.98964	0.00443454	0.0383835	8	112	4	146		-487
chr10	114308094	114308326	233	+	143187	intron	VTI1A	3.3647	1.7287e-22	5.14753e-19	98	4904	93	5663		-232
chr10	119028569	119028872	304	+	6571	intron	SLC18A2	3.50896	6.96056e-16	4.04557e-13	16	733	14	1130		-303
chr10	120927309	120927951	643	-	10935	utr3	PRDX3	1.81866	8.10021e-06	0.000426346	33	571	42	870		-642
chr10	126086015	126086397	383	-	4942	utr3	OAT	3.3624	1.28637e-14	5.66771e-12	13	697	18	1037		-382
chr10	128815000	128815802	803	+	1793	intron	DOCK1	3.64733	1.60075e-13	5.99008e-11	10	464	7	697		-802
chr10	131977616	131977864	249	+	10539	utr3	GLRX3	2.28904	0.00387149	0.0351184	5	111	3	96		-248
chr10	132005469	132005913	445	*	NA	intergenic	NA	2.3232	0.000440752	0.00865565	5	138	7	187		-444
chr10	134081893	134082344	452	-	282974	intron	STK32C	3.037	0.00519737	0.042508	1	53	2	81		-451
chr10	134086935	134087329	395	-	282974	intron	STK32C	Inf	6.19745e-05	0.0021215	0	63	0	77		-394
chr10	134228776	134229178	403	+	170394	intron	PWWP2B	3.88052	4.76159e-11	1.07498e-08	5	273	4	453		-402
chr10	134516964	134517491	528	+	3632	intron	INPP5A	3.95397	1.13368e-05	0.000565121	1	121	2	127		-527
chr11	252512	252951	440	+	5719	utr3	PSMD13	1.63936	0.00166868	0.0208429	9	205	22	321		-439
chr11	3860991	3861286	296	-	391	intron	RHOG	2.43446	0.000290449	0.00652483	6	146	5	174		-295
chr11	4159591	4160020	430	+	6240	utr3	RRM1	2.28824	4.70824e-06	0.000275407	12	282	15	437		-429
chr11	5756618	5756920	303	*	NA	intergenic	NA	3.49953	0.00377889	0.0345851	1	50	1	73		-302
chr11	9207210	9207490	281	-	23258	intron	DENND5A	2.97556	0.00179929	0.0218985	1	68	3	103		-280
chr11	9466683	9466909	227	+	10527	utr3	IPO7	1.97975	0.00465085	0.0397519	9	109	3	148		-226
chr11	10818696	10818997	302	-	1982	utr3	EIF4G2	1.60598	3.06682e-05	0.00123019	66	857	48	1010		-301
chr11	10819155	10819398	244	-	1982	utr3	EIF4G2	1.27963	0.00549291	0.0438764	31	341	25	389		-243
chr11	11581205	11581824	620	-	374378	intron	GALNTL4	3.32968	3.5802e-11	8.48645e-09	8	473	10	493		-619
chr11	12189742	12190068	327	+	9645	intron	MICAL2	2.42134	0.00565916	0.0447701	4	63	2	114		-326
chr11	14479116	14479400	285	-	1315	utr3	COPB1	2.01741	0.00041092	0.00825375	11	177	9	264		-284
chr11	14526460	14526751	292	-	5682	utr3	PSMA1	2.14307	3.97327e-06	0.000242272	23	373	14	514		-291
chr11	17190268	17190769	502	-	5286	cds	PIK3C2A	1.84448	0.000361224	0.00760467	17	242	12	322		-501
chr11	18428871	18429317	447	+	3939	utr3	LDHA	3.86001	9.79002e-21	1.48574e-17	125	9243	110	8911		-446
chr11	32613428	32613799	372	+	10480	intron	EIF3M	3.42326	3.69699e-08	4.20794e-06	7	224	2	300		-371
chr11	33307986	33308428	443	+	10114	cds	HIPK3	1.46778	0.00662962	0.0494272	15	201	15	246		-442
chr11	33308592	33308989	398	+	10114	cds	HIPK3	1.76283	0.0026052	0.0273113	10	176	11	207		-397
chr11	34120920	34121299	380	+	4076	utr3	CAPRIN1	1.28636	0.00311081	0.0305776	37	397	33	527		-379
chr11	34492956	34493537	582	+	847	utr3	CAT	2.02278	0.00034413	0.00734422	14	364	31	638		-581
chr11	35016694	35017050	357	+	8050	utr3	PDHX	1.91094	0.00314993	0.0307859	8	124	7	183		-356
chr11	43515344	43515975	632	+	55761	utr3	TTC17	1.20098	0.00583006	0.0455513	28	377	45	533		-631
chr11	44100515	44100809	295	+	84680	intron	ACCS	2.73137	3.85571e-05	0.00147723	6	153	4	207		-294
chr11	47738587	47739048	462	-	23360	utr3	FNBP4	1.32687	0.000965689	0.0145103	55	562	45	801		-461
chr11	47767606	47767928	323	-	23360	cds	FNBP4	1.32962	0.00201841	0.0235226	44	401	27	569		-322
chr11	57180776	57181056	281	-	29015	intron	SLC43A3	1.88347	0.00385448	0.0350393	7	130	8	169		-280
chr11	57183595	57183849	255	-	29015	intron	SLC43A3	2.20107	0.000376875	0.00779341	7	173	8	197		-254
chr11	59861162	59861611	450	+	2206	intron	MS4A2	1.35062	0.00132839	0.0179331	40	511	40	584		-449
chr11	60871072	60871575	504	+	921	intron	CD5	2.58638	0.00251984	0.0267319	0	96	6	95		-503
chr11	61066988	61067567	580	-	1642	utr3	DDB1	3.10227	6.6636e-17	4.66742e-14	40	1580	46	2447		-579
chr11	61606218	61606689	472	+	9415	intron	FADS2	2.17447	0.00487158	0.0408587	2	116	7	98		-471
chr11	63777670	63778532	863	-	28992	intron	MACROD1	3.3259	4.94569e-18	3.65139e-15	32	1369	31	2073		-862
chr11	63866920	63867333	414	-	28992	intron	MACROD1	2.16581	9.17848e-06	0.000473967	13	344	18	403		-413
chr11	63880909	63881320	412	+	23769	intron	FLRT1	2.94544	1.74568e-11	4.41544e-09	15	604	20	859		-411
chr11	63881462	63881822	361	+	23769	intron	FLRT1	3.45258	1.56145e-15	8.2027e-13	20	743	11	1107		-360
chr11	63881959	63882210	252	+	23769	intron	FLRT1	3.88949	9.97717e-09	1.34259e-06	2	191	4	293		-251
chr11	64026836	64027375	540	+	5331	intron	PLCB3	1.85063	0.00625125	0.0475272	7	139	7	129		-539
chr11	64084181	64084417	237	-	51504	utr3	TRMT112	1.75847	0.0001977	0.00494557	21	325	20	425		-236
chr11	64953939	64954317	379	+	823	intron	CAPN1	3.05962	0.000294068	0.00658447	0	90	5	136		-378
chr11	64956999	64957760	762	+	823	intron	CAPN1	1.59412	0.000339604	0.00725897	24	414	32	495		-761
chr11	65071600	65071887	288	*	NA	intergenic	NA	4.56599	0.000780477	0.0126907	1	46	0	85		-287
chr11	65345828	65346215	388	+	254102	intron	EHBP1L1	1.97709	0.00650335	0.0488189	7	95	4	141		-387
chr11	65622328	65622610	283	-	1072	utr3	CFL1	1.44013	6.91617e-05	0.00230082	86	1168	111	1740		-282
chr11	68156448	68157149	702	+	4041	intron	LRP5	3.32787	3.7279e-11	8.70384e-09	17	640	14	1065		-701
chr11	68584250	68584650	401	-	1374	intron	CPT1A	3.71738	0.00119311	0.0167224	1	50	1	95		-400
chr11	68838116	68838609	494	+	219931	intron	TPCN2	2.698	0.000113526	0.00327397	3	150	6	162		-493
chr11	68844256	68844744	489	+	219931	intron	TPCN2	2.22735	0.000111362	0.00322939	7	198	11	257		-488
chr11	68849663	68849917	255	+	219931	intron	TPCN2	5.20473	1.03238e-05	0.000520325	1	84	0	117		-254
chr11	71151074	71151305	232	-	1717	intron	DHCR7	3.54785	0.00513307	0.0422477	2	72	0	51		-231
chr11	71151328	71151715	388	-	1717	intron	DHCR7	2.90677	3.18104e-06	0.000202556	7	225	4	214		-387
chr11	71365541	71365838	298	*	NA	intergenic	NA	3.68104	8.76557e-10	1.50597e-07	9	297	0	324		-297
chr11	71449451	71449863	413	*	NA	intergenic	NA	2.15645	0.000223548	0.00545018	5	208	13	220		-412
chr11	71451253	71451678	426	*	NA	intergenic	NA	1.82751	0.000919944	0.014118	16	205	8	255		-425
chr11	71713045	71713371	327	+	10068	utr3	IL18BP	1.90159	0.00204986	0.0237775	8	129	9	219		-326
chr11	72403875	72404256	382	-	116985	intron	ARAP1	2.67305	6.03911e-06	0.000338748	9	236	5	241		-381
chr11	72433056	72433328	273	-	116985	utr5	ARAP1	1.93005	1.08056e-05	0.000540614	26	450	25	602		-272
chr11	75061881	75062339	459	-	408	intron	ARRB1	2.75013	1.13543e-09	1.85727e-07	19	571	14	618		-458
chr11	77327244	77327719	476	-	1207	utr3	CLNS1A	1.51588	6.69803e-05	0.0022561	63	781	65	1216		-475
chr11	78180820	78181149	330	-	79731	intron	NARS2	2.79302	0.00010572	0.00312548	5	143	3	154		-329
chr11	85671730	85672055	326	-	8301	intron	PICALM	1.41814	0.00503266	0.0417469	24	204	13	338		-325
chr11	85779167	85779520	354	-	8301	intron	PICALM	1.74001	1.31243e-05	0.000639069	41	679	46	892		-353
chr11	89934681	89935140	460	-	26973	utr3	CHORDC1	1.4511	0.00441061	0.0382613	20	224	16	310		-459
chr11	89935322	89935639	318	-	26973	utr3	CHORDC1	1.61611	0.00468242	0.0398845	11	183	13	212		-317
chr11	93471290	93471668	379	-	79101	cds	TAF1D	1.54236	0.000191114	0.00483841	41	544	38	699		-378
chr11	111612054	111612310	257	-	5519	intron.utr3	PPP2R1B	2.99491	0.00623508	0.0474439	2	54	1	76		-256
chr11	111933253	111933817	565	+	1737	utr3	DLAT	1.85847	0.000214243	0.00527843	20	310	12	309		-564
chr11	118883121	118883471	351	+	338657	intron	CCDC84	3.40078	1.71348e-05	0.000796041	3	127	2	158		-350
chr11	122645460	122645805	346	+	84959	intron	UBASH3B	2.98471	1.86072e-05	0.000851634	5	160	3	180		-345
chr11	126307057	126307470	414	-	84623	intron	KIRREL3	2.69365	2.92564e-05	0.00118751	6	183	5	198		-413
chr11	126307574	126307860	287	-	84623	intron	KIRREL3	3.6865	8.66212e-06	0.000450711	2	114	2	166		-286
chr11	128673166	128673681	516	+	2313	intron	FLI1	2.22247	0.000447298	0.00874024	6	157	8	195		-515
chr11	134022410	134022914	505	-	23310	utr3	NCAPD3	1.42829	0.00564011	0.0446754	20	219	15	291		-504
chr12	3754442	3755267	826	-	84766	intron	EFCAB4B	2.4421	0.000485625	0.00921238	2	135	8	156		-825
chr12	4664532	4665116	585	+	10635	intron	RAD51AP1	2.26383	0.000147139	0.00397975	11	181	5	235		-584
chr12	6679340	6679587	248	-	1108	utr3	CHD4	1.90638	0.00027361	0.00625395	14	209	13	345		-247
chr12	6926853	6927277	425	+	920	intron	CD4	2.68131	0.000126752	0.00355858	4	139	5	172		-424
chr12	6979542	6979904	363	+	7167	utr3	TPI1	1.83446	8.49171e-06	0.000443534	33	603	38	763		-362
chr12	7077951	7078505	555	-	11331	intron	PHB2	2.17892	7.23577e-05	0.00237002	14	231	7	282		-554
chr12	7120436	7120902	467	-	10162	intron	LPCAT3	3.06275	2.56688e-05	0.00108544	3	141	4	174		-466
chr12	10851760	10852237	478	-	8531	utr3	CSDA	1.22748	0.00156231	0.0200647	58	736	74	931		-477
chr12	15095023	15095437	415	-	397	utr3	ARHGDIB	1.19944	0.00113232	0.0161607	97	1007	95	1383		-414
chr12	16055939	16056283	345	+	11171	utr3	STRAP	2.05703	7.83392e-05	0.00249819	14	254	12	331		-344
chr12	17860628	17861413	786	*	NA	intergenic	NA	1.79002	0.00573372	0.045062	7	146	9	149		-785
chr12	21788282	21788545	264	-	3945	utr3	LDHB	2.83109	1.10198e-14	5.10218e-12	42	1691	62	2316		-263
chr12	21794391	21794729	339	-	3945	intron	LDHB	2.63176	0.000837736	0.0132127	2	110	5	122		-338
chr12	22218190	22218565	376	+	55907	utr3	CMAS	1.83048	7.4812e-05	0.00242712	24	351	19	478		-375
chr12	32406730	32407354	625	+	636	intron	BICD1	2.6267	7.43024e-06	0.00040113	6	260	9	230		-624
chr12	48191531	48191804	274	-	51564	intron	HDAC7	4.22984	9.29156e-07	7.07012e-05	1	110	2	199		-273
chr12	48539423	48539846	424	+	5213	utr3	PFKM	2.23332	0.000402297	0.00811233	8	159	6	196		-423
chr12	49521571	49521829	259	-	10376	utr3	TUBA1B	2.11462	3.21047e-09	4.66492e-07	83	1687	82	2173		-258
chr12	49896530	49896843	314	+	65244	intron	SPATS2	4.21138	4.69478e-05	0.00171683	1	88	1	112		-313
chr12	49976443	49976687	245	*	NA	intergenic	NA	2.63277	0.000765619	0.0125236	6	100	1	136		-244
chr12	53868627	53868976	350	+	5094	intron	PCBP2	2.1058	0.00114906	0.0163621	4	158	10	163		-349
chr12	54678469	54678712	244	*	NA	antisense	NA	3.2092	1.60208e-20	2.30338e-17	106	4240	79	4961		-243
chr12	54806957	54807226	270	-	3678	intron	ITGA5	2.32225	0.00191179	0.0227161	7	177	5	139		-269
chr12	54810692	54811083	392	-	3678	intron	ITGA5	2.22005	0.000717768	0.0120734	14	340	11	274		-391
chr12	54936592	54936831	240	+	3071	utr3	NCKAP1L	2.26947	0.00256854	0.0270533	3	94	6	142		-239
chr12	56537668	56537966	299	+	23344	utr3	ESYT1	1.8366	0.000699347	0.0118837	19	201	6	285		-298
chr12	57031959	57032205	247	-	506	utr3	ATP5B	1.93591	1.81566e-07	1.6813e-05	60	1216	69	1437		-246
chr12	57628191	57628479	289	+	6472	utr3	SHMT2	1.45604	0.00459244	0.0394539	23	229	12	290		-288
chr12	57882104	57882526	423	+	4141	intron	MARS	2.09105	0.00337421	0.0320826	7	117	4	135		-422
chr12	58128628	58129042	415	-	116986	intron	AGAP2	2.58075	0.00532733	0.0430552	4	71	1	91		-414
chr12	62756976	62757450	475	+	9958	intron	USP15	1.82136	0.000454923	0.00881982	17	255	12	296		-474
chr12	64841914	64842371	458	+	11260	utr3	XPOT	1.32607	0.00230277	0.0254572	37	416	32	517		-457
chr12	67678424	67678646	223	+	55832	intron	CAND1	3.22513	5.28977e-06	0.000302303	3	160	4	192		-222
chr12	73467369	73467627	259	*	NA	intergenic	NA	Inf	4.44664e-05	0.0016482	0	50	0	98		-258
chr12	95907674	95908072	399	+	10988	utr3	METAP2	1.58728	0.00102818	0.0151656	32	326	22	565		-398
chr12	98995200	98995475	276	+	5250	utr3	SLC25A3	2.5881	2.01003e-07	1.83639e-05	17	588	31	991		-275
chr12	105064262	105064649	388	+	50515	intron	CHST11	3.49282	1.17108e-16	7.80252e-14	18	841	17	1309		-387
chr12	105101481	105101813	333	+	50515	intron	CHST11	5.39418	2.03918e-06	0.000137882	1	105	0	122		-332
chr12	107208496	107209074	579	+	55188	cds	RIC8B	1.95718	0.00423958	0.0372711	4	128	9	142		-578
chr12	108093637	108094212	576	+	11137	intron	PWP1	1.65294	0.00232563	0.0256373	18	194	9	267		-575
chr12	109040874	109041176	303	-	23603	utr3	CORO1C	1.42518	0.00431271	0.0377389	16	223	23	348		-302
chr12	110352700	110353030	331	+	84260	intron	TCHP	3.27995	0.000246063	0.00582469	2	87	2	124		-330
chr12	110872743	110872994	252	-	10094	utr3	ARPC3	1.9774	0.00202178	0.0235417	8	136	7	184		-251
chr12	112704898	112705119	222	-	283450	intron	C12orf51	3.49368	2.13743e-11	5.30803e-09	2	366	13	551		-221
chr12	112734017	112734528	512	-	283450	intron	C12orf51	3.62219	3.06703e-07	2.7202e-05	2	176	4	222		-511
chr12	112734842	112735139	298	-	283450	intron	C12orf51	2.74342	0.000872226	0.0135378	3	95	3	122		-297
chr12	113755564	113756369	806	-	80024	intron	SLC24A6	3.64912	2.91994e-20	3.79829e-17	23	1301	25	1980		-805
chr12	113772265	113772852	588	-	80024	intron	SLC24A6	1.46225	0.00174048	0.0215038	20	317	29	412		-587
chr12	113828118	113828671	554	*	196463	utr3*	PLBD2	1.86517	6.47618e-06	0.000359573	37	538	31	812		-553
chr12	118582585	118583011	427	+	5037	utr3	PEBP1	1.58755	0.00105047	0.0153781	19	247	21	411		-426
chr12	118776683	118777022	340	-	51347	intron	TAOK3	Inf	6.59277e-05	0.00223442	0	58	0	82		-339
chr12	120565107	120565756	650	-	10985	utr3	GCN1L1	1.23658	0.00401962	0.0359423	27	393	49	580		-649
chr12	120899478	120899721	244	+	283459	utr3	GATC	2.49541	0.000106866	0.00315254	3	162	9	202		-243
chr12	120941124	120941626	503	-	84274	utr3	COQ5	2.24571	0.00475179	0.0402229	4	81	4	126		-502
chr12	124104510	124105073	564	+	57696	utr3	DDX55	1.27202	0.00631601	0.0478598	21	302	33	403		-563
chr12	124842460	124842904	445	-	9612	intron	NCOR2	4.12293	6.86752e-14	2.8e-11	8	391	2	558		-444
chr12	124987951	124988273	323	-	9612	intron	NCOR2	3.42222	0.00552304	0.0440633	1	54	1	61		-322
chr12	125000106	125000364	259	-	9612	intron	NCOR2	2.4828	0.00418653	0.0369391	2	66	4	118		-258
chr12	131360497	131360789	293	+	5901	utr3	RAN	2.81951	5.98279e-15	2.86722e-12	59	1977	59	2520		-292
chr12	132608609	132609016	408	+	347918	intron	EP400NL	3.18272	1.86399e-08	2.33572e-06	5	278	8	359		-407
chr12	132640693	132641211	519	*	79050	utr3*	NOC4L	3.13004	4.41716e-05	0.00164392	4	125	2	159		-518
chr12	132641396	132641946	551	*	79050	utr3*	NOC4L	2.15067	0.00154203	0.0198791	8	123	4	166		-550
chr12	132642532	132642868	337	*	NA	intergenic	NA	3.19787	0.00226878	0.0252141	2	69	1	79		-336
chr12	133094859	133095463	605	+	57666	intron	FBRSL1	3.29751	5.22555e-14	2.1961e-11	16	689	15	965		-604
chr12	133331286	133331703	418	-	23141	cds	ANKLE2	1.458	0.00503402	0.0417469	17	227	17	276		-417
chr15	20586151	20586429	279	*	NA	intergenic	NA	2.42021	2.02369e-06	0.000137174	23	432	17	743		-278
chr15	23003316	23003564	249	+	23191	utr3	CYFIP1	3.33538	0.000154187	0.00412529	4	88	0	133		-248
chr15	31014980	31015235	256	+	100288637	intron	LOC100288637	3.49225	0.000372917	0.00775005	2	70	1	115		-255
chr15	31233788	31234716	929	+	22909	utr3	FAN1	1.12225	0.00633929	0.0479463	42	505	58	672		-928
chr15	34602476	34602850	375	-	9990	intron	SLC12A6	3.12727	1.50716e-06	0.000107496	4	167	5	262		-374
chr15	40328289	40328563	275	-	6727	utr3	SRP14	1.56509	0.00141702	0.0187633	19	261	20	365		-274
chr15	48634231	48634627	397	+	1854	utr3	DUT	2.00726	1.89304e-06	0.00012993	28	526	31	763		-396
chr15	49170971	49171264	294	+	23741	utr3	EID1	1.62843	0.000364386	0.007651	29	354	20	466		-293
chr15	55473571	55473982	412	-	51187	utr3	RSL24D1	1.83331	2.4876e-05	0.00106178	23	420	32	648		-411
chr15	56320671	56321129	459	*	NA	intergenic	NA	3.68981	0.00146628	0.0192384	1	71	1	66		-458
chr15	59323045	59323885	841	+	54778	cds	RNF111	1.28589	0.00102877	0.0151662	63	703	57	875		-840
chr15	59431574	59432051	478	-	4643	intron	MYO1E	2.69371	1.69262e-06	0.000118557	9	280	7	271		-477
chr15	60639551	60639821	271	-	302	utr3	ANXA2	2.03668	0.000751623	0.0124118	10	161	7	217		-270
chr15	62157740	62158000	261	-	54832	intron.utr3	VPS13C	3.06587	2.07256e-08	2.55028e-06	8	287	7	394		-260
chr15	63189599	63189885	287	*	NA	intergenic	NA	3.54908	1.31991e-07	1.28313e-05	5	221	2	216		-286
chr15	64011430	64011994	565	-	8925	intron	HERC1	2.84105	0.000169156	0.00441763	4	119	3	152		-564
chr15	67497750	67498152	403	-	79719	intron	AAGAB	2.63759	0.00173103	0.0214257	3	91	3	110		-402
chr15	69678164	69678587	424	+	54852	intron	PAQR5	2.44183	0.00025957	0.00604491	6	116	5	213		-423
chr15	70342926	70343230	305	-	7090	intron	TLE3	2.86125	0.00104765	0.0153533	3	71	2	129		-304
chr15	72491417	72491944	528	-	5315	utr3	PKM2	2.07562	1.12754e-09	1.85549e-07	154	3461	150	3357		-527
chr15	75128623	75129105	483	-	25989	utr3	ULK3	1.17668	0.00400941	0.035901	60	577	40	635		-482
chr15	76508678	76508934	257	-	2108	utr3	ETFA	1.83646	0.000995876	0.0148252	12	168	11	282		-256
chr15	78461317	78461584	268	+	3419	utr3	IDH3A	3.75695	5.48235e-08	5.873e-06	5	207	1	229		-267
chr15	78841151	78841516	366	+	5685	utr3	PSMA4	1.65941	0.00018997	0.00481763	25	382	29	544		-365
chr15	79189399	79189647	249	+	10933	utr3	MORF4L1	1.80226	0.000854095	0.013378	12	225	14	262		-248
chr15	79216569	79216920	352	-	1512	intron	CTSH	3.46386	0.000476571	0.00912297	0	65	3	116		-351
chr15	81226947	81227365	419	+	57214	intron	KIAA1199	1.86473	0.00576753	0.0452344	7	143	7	127		-418
chr15	81467872	81468158	287	*	NA	intergenic	NA	3.823	2.13407e-07	1.93676e-05	2	158	3	226		-286
chr15	81573781	81574746	966	+	3603	intron	IL16	2.217	1.9664e-06	0.000133955	13	415	23	483		-965
chr15	85213014	85213286	273	-	23478	utr3	SEC11A	2.65491	6.33078e-07	5.13169e-05	11	278	8	370		-272
chr15	85649368	85649648	281	+	5151	intron	PDE8A	4.40645	0.00200955	0.0234608	0	54	1	59		-280
chr15	89859603	89860201	599	+	55215	utr3	FANCI	1.19687	0.00220184	0.0247817	64	686	63	887		-598
chr15	89868202	89868555	354	-	5428	intron	POLG	2.96564	2.09615e-05	0.000935007	7	143	1	197		-353
chr15	89956873	89957432	560	*	NA	intergenic	NA	2.57247	8.89263e-05	0.00277623	6	157	5	196		-559
chr15	91043379	91043929	551	+	8826	utr3	IQGAP1	1.96893	6.11204e-06	0.000341437	22	471	30	630		-550
chr15	91160179	91160522	344	+	64784	intron	CRTC3	2.49712	0.00106169	0.0154349	3	126	5	113		-343
chr15	91292657	91293278	622	+	641	cds	BLM	1.5668	0.000158717	0.00422993	44	564	33	663		-621
chr15	94841453	94841957	505	+	55784	cds	MCTP2	1.4685	0.000654281	0.0113407	37	490	31	516		-504
chr15	100366683	100367014	332	*	NA	intergenic	NA	2.14376	0.00171356	0.0212576	7	149	5	132		-331
chr15	101120676	101121112	437	-	55180	cds	LINS	2.05363	8.00413e-05	0.00253359	17	259	9	324		-436
chr16	4394379	4394598	220	*	84662	utr3*	GLIS2	3.16381	8.2769e-16	4.71042e-13	26	1156	31	1614		-219
chr16	4394769	4394922	154	*	NA	intergenic	NA	2.9573	9.40123e-06	0.000483641	5	160	4	219		-153
chr16	4718473	4718979	507	+	23295	intron	MGRN1	3.40104	4.91136e-10	9.24154e-08	18	999	29	1721		-506
chr16	11265716	11266102	387	+	23274	intron	CLEC16A	2.96314	1.74383e-07	1.62028e-05	6	238	8	356		-386
chr16	11844529	11845346	818	-	29066	utr3	ZC3H7A	1.19458	0.00575708	0.0451784	41	404	34	524		-817
chr16	15729542	15730192	651	-	9665	cds	KIAA0430	1.30193	0.00383172	0.0349005	28	372	33	436		-650
chr16	21994435	21994786	352	+	7385	utr3	UQCRC2	2.72939	1.35137e-10	2.82719e-08	26	661	17	884		-351
chr16	23945006	23945359	354	+	5579	intron	PRKCB	3.4232	3.78579e-06	0.00023292	19	624	12	1213		-353
chr16	24060585	24060907	323	+	5579	intron	PRKCB	2.29902	0.000934136	0.0142081	5	141	10	265		-322
chr16	24088667	24088919	253	+	5579	intron	PRKCB	3.81162	0.00511444	0.0421198	3	169	5	460		-252
chr16	28512638	28513136	499	-	246778	intron	IL27	2.01576	0.00159948	0.0203697	7	158	8	166		-498
chr16	28998546	28999059	514	+	27040	intron	LAT	1.32887	0.00235616	0.0257865	30	408	38	513		-513
chr16	29230398	29230787	390	*	NA	intergenic	NA	2.57589	0.00029769	0.00662214	2	110	7	183		-389
chr16	29919336	29919681	346	-	253980	intron	KCTD13	3.55018	0.000262442	0.00608069	2	92	1	96		-345
chr16	30081483	30081739	257	+	226	utr3	ALDOA	1.3668	0.000279049	0.00632597	70	1096	86	1041		-256
chr16	46694200	46694485	286	-	55737	utr3	VPS35	3.25976	0.0015488	0.0199286	3	68	0	88		-285
chr16	46949347	46949879	533	+	84706	intron	GPT2	3.151	1.42959e-11	3.68416e-09	17	511	8	694		-532
chr16	56878419	56878663	245	+	9688	utr3	NUP93	2.83685	1.4275e-07	1.37307e-05	15	294	2	363		-244
chr16	57678206	57678920	715	+	9289	intron	GPR56	1.85288	0.00191129	0.0227161	11	158	8	214		-714
chr16	58741624	58742077	454	-	2806	utr3	GOT2	2.50501	1.39799e-05	0.000668807	10	228	6	260		-453
chr16	58926754	58927149	396	*	NA	intergenic	NA	3.82745	0.000923179	0.0141349	1	74	2	162		-395
chr16	67576270	67576631	362	+	79567	cds	FAM65A	3.16184	9.88519e-06	0.000502856	4	159	3	177		-361
chr16	70286283	70286595	313	-	16	utr3	AARS	1.50772	0.00214455	0.0244095	17	264	23	351		-312
chr16	70440688	70440999	312	-	6483	intron	ST3GAL2	2.01337	0.000581987	0.0104491	7	201	12	208		-311
chr16	70472270	70472536	267	-	6483	intron	ST3GAL2	1.85965	0.00184185	0.0221744	6	145	13	231		-266
chr16	70605639	70606115	477	+	23450	utr3	SF3B3	1.98061	2.48757e-07	2.2353e-05	40	857	59	1267		-476
chr16	75327663	75327921	259	-	10428	utr3	CFDP1	3.05786	9.03171e-06	0.000468158	5	167	3	191		-258
chr16	76504706	76505018	313	+	85445	intron	CNTNAP4	2.75419	0.000800022	0.0128781	2	80	4	142		-312
chr16	81504619	81504972	354	+	80790	intron	CMIP	3.13349	3.60372e-11	8.48645e-09	10	525	14	605		-353
chr16	81532359	81532773	415	+	80790	intron	CMIP	3.05887	1.86678e-09	2.91399e-07	8	376	11	478		-414
chr16	81584445	81584870	426	+	80790	intron	CMIP	3.98891	9.8173e-19	8.12664e-16	12	811	10	1080		-425
chr16	81610602	81610797	196	+	80790	intron	CMIP	4.39267	0.00212592	0.0242783	0	49	1	64		-195
chr16	81610941	81611151	211	+	80790	intron	CMIP	4.14507	7.26725e-05	0.00237748	2	80	0	113		-210
chr16	81611346	81611559	214	+	80790	intron	CMIP	3.01628	0.000114488	0.00328862	3	103	3	162		-213
chr16	81611658	81611878	221	+	80790	intron	CMIP	2.52418	0.00157154	0.0201359	4	77	3	145		-220
chr16	81702384	81702657	274	+	80790	intron	CMIP	3.56517	3.87152e-10	7.60851e-08	6	285	5	424		-273
chr16	81702702	81702892	191	+	80790	intron	CMIP	5.48105	1.00637e-06	7.55246e-05	0	97	1	145		-190
chr16	81702955	81703368	414	+	80790	intron	CMIP	3.27238	2.35567e-11	5.79729e-09	11	412	9	643		-413
chr16	81737023	81737286	264	+	80790	intron	CMIP	2.47981	0.000192358	0.00485641	5	121	6	216		-263
chr16	82181878	82182452	575	-	10200	utr3	MPHOSPH6	1.50036	0.0059042	0.0458774	17	217	12	221		-574
chr16	85216506	85216850	345	*	NA	intergenic	NA	3.77533	9.2474e-14	3.66103e-11	4	446	11	670		-344
chr16	85279812	85280079	268	*	NA	intergenic	NA	3.94586	7.9347e-05	0.00252331	2	112	2	229		-267
chr16	85394351	85394535	185	*	NA	intergenic	NA	3.58523	2.12999e-05	0.000944561	2	98	2	165		-184
chr16	85394673	85394964	292	*	NA	intergenic	NA	3.33235	0.000301418	0.0066741	14	524	16	1153		-291
chr16	85416374	85417043	670	*	NA	intergenic	NA	3.64658	4.18748e-08	4.70308e-06	24	1326	31	2464		-669
chr16	85473262	85473607	346	*	NA	intergenic	NA	2.83081	3.49495e-06	0.000218186	4	178	8	288		-345
chr16	85531886	85532176	291	*	NA	intergenic	NA	3.3926	1.58888e-07	1.4993e-05	5	311	10	553		-290
chr16	85605718	85606111	394	*	NA	intergenic	NA	3.94959	2.89329e-28	1.9759e-24	63	3932	46	5183		-393
chr16	85629197	85629421	225	*	NA	intergenic	NA	5.49171	8.22467e-07	6.40095e-05	1	116	0	126		-224
chr16	85629492	85629740	249	*	NA	intergenic	NA	3.47125	9.10366e-06	0.000470994	3	147	2	149		-248
chr16	87252704	87253192	489	*	NA	intergenic	NA	3.02918	0.00535755	0.0432228	2	60	1	72		-488
chr16	87327706	87328062	357	*	NA	intergenic	NA	Inf	0.00053974	0.00992867	0	41	0	69		-356
chr16	87734132	87734429	298	*	57338	utr3*	JPH3	3.53767	0.00298967	0.0298025	2	47	0	81		-297
chr16	88086201	88086864	664	+	54971	intron	BANP	3.38572	2.51578e-11	6.13602e-09	9	399	8	566		-663
chr16	88087341	88087630	290	+	54971	intron	BANP	2.89124	0.000292291	0.00655543	5	98	1	145		-289
chr16	88842910	88843211	302	-	9780	intron	PIEZO1	2.74768	0.0021012	0.0241373	4	75	1	108		-301
chr16	88948694	88948964	271	-	863	intron	CBFA2T3	3.18029	3.65229e-09	5.22354e-07	18	448	6	746		-270
chr16	88982361	88982898	538	-	863	intron	CBFA2T3	3.69707	1.04371e-24	4.07301e-21	59	2993	44	4267		-537
chr16	89208893	89209214	322	+	197322	intron	ACSF3	2.74989	0.000145734	0.00396102	4	109	4	186		-321
chr16	89359755	89360104	350	-	29123	intron	ANKRD11	3.7821	4.23863e-08	4.72599e-06	2	191	4	255		-349
chr16	89365853	89366076	224	-	29123	intron	ANKRD11	1.33917	0.00632748	0.0479201	19	233	24	360		-223
chr16	89366201	89366538	338	-	29123	intron	ANKRD11	1.37655	0.00148309	0.0193567	27	413	42	556		-337
chr16	89468878	89469215	338	-	29123	intron	ANKRD11	2.57008	0.00582283	0.0455113	2	71	3	89		-337
chr16	89645875	89646216	342	+	27132	intron	CPNE7	3.15903	6.33138e-16	3.75988e-13	33	1242	26	1607		-341
chr16	89646669	89646921	253	+	27132	intron	CPNE7	3.74551	1.42045e-12	4.35984e-10	11	438	2	501		-252
chr16	89647097	89647689	593	+	27132	intron	CPNE7	3.16561	3.36334e-19	3.2813e-16	70	3029	68	3635		-592
chr16	89654134	89654519	386	+	27132	intron	CPNE7	3.40889	1.22215e-22	4.17318e-19	91	4637	74	4715		-385
chr16	89662292	89662591	300	+	27132	intron	CPNE7	1.63701	0.00159796	0.0203693	17	280	15	247		-299
chr16	89974699	89974990	292	+	22980	intron	TCF25	1.68283	0.00337226	0.0320826	10	181	13	216		-291
chr17	662671	663429	759	-	51031	utr3	GLOD4	1.21521	0.00522091	0.0425603	37	370	35	539		-758
chr17	1247868	1248104	237	-	7531	utr3	YWHAE	1.56254	0.00373339	0.0343499	12	195	17	269		-236
chr17	1248228	1248446	219	-	7531	utr3	YWHAE	2.34548	0.000365198	0.00766215	7	147	5	182		-218
chr17	1553952	1554230	279	-	10594	utr3	PRPF8	2.70158	9.33322e-07	7.0821e-05	6	267	11	328		-278
chr17	1703185	1703671	487	-	114826	cds	SMYD4	1.78268	0.00594858	0.0460594	8	144	8	150		-486
chr17	1800431	1800845	415	+	6117	utr3	RPA1	2.32162	1.18623e-05	0.000588099	12	236	10	364		-414
chr17	2057015	2057442	428	-	23293	intron	SMG6	3.468	3.30551e-11	7.92076e-09	6	407	9	485		-427
chr17	2379251	2379844	594	-	79066	intron	METTL16	2.10305	0.00115109	0.0163688	5	152	9	170		-593
chr17	2505814	2506299	486	+	5048	intron	PAFAH1B1	1.87934	0.00519591	0.042508	3	119	11	159		-485
chr17	3841062	3841379	318	-	489	intron	ATP2A3	4.04422	0.000154516	0.00413006	2	87	0	90		-317
chr17	4618773	4619052	280	+	409	intron	ARRB2	4.92668	4.94234e-08	5.37888e-06	1	146	1	182		-279
chr17	4793155	4793430	276	+	50488	intron	MINK1	2.69174	0.00011508	0.00329867	3	127	6	189		-275
chr17	4862562	4862844	283	-	9552	utr3	SPAG7	1.87287	0.00207023	0.023892	7	146	11	212		-282
chr17	4885644	4885938	295	-	23125	intron	CAMTA2	3.03381	0.00536932	0.0432666	1	60	2	72		-294
chr17	5336104	5336413	310	+	84268	utr3	RPAIN	2.17756	8.9626e-07	6.87308e-05	22	429	22	656		-309
chr17	5405986	5406524	539	-	22861	intron	NLRP1	2.75721	0.000751789	0.0124118	4	77	2	147		-538
chr17	7095416	7095695	280	-	1742	intron	DLG4	2.13343	0.00183978	0.0221691	3	127	9	156		-279
chr17	7095891	7096156	266	-	1742	intron	DLG4	2.77461	0.000122443	0.00345891	4	128	4	168		-265
chr17	7110418	7110834	417	-	1742	intron	DLG4	3.19111	9.35922e-08	9.39947e-06	9	256	2	284		-416
chr17	7416848	7417221	374	+	5430	cds	POLR2A	1.53347	9.70301e-06	0.000495434	147	2054	155	2670		-373
chr17	7764914	7765383	470	+	124637	utr3	CYB5D1	1.76875	0.000723648	0.0121058	15	237	14	296		-469
chr17	7812782	7813328	547	+	1107	intron	CHD3	2.48052	2.09929e-09	3.25831e-07	26	810	28	794		-546
chr17	8377706	8378228	523	-	4628	utr3	MYH10	1.43243	0.0021257	0.0242783	26	273	23	451		-522
chr17	14107611	14108010	400	+	1352	intron	COX10	3.61882	0.00210856	0.0241708	1	61	1	71		-399
chr17	15332664	15332952	289	*	NA	intergenic	NA	2.52077	0.0034544	0.0326632	4	91	2	93		-288
chr17	15977269	15977723	455	-	9611	intron	NCOR1	2.46263	0.00495744	0.0413756	2	92	4	83		-454
chr17	17626393	17626773	381	+	10743	intron	RAI1	2.94227	4.74599e-06	0.000275843	3	166	7	252		-380
chr17	17675631	17676023	393	+	10743	intron	RAI1	2.66766	0.000629911	0.0110516	4	111	3	128		-392
chr17	20787050	20787328	279	-	339184	intron	CCDC144NL	3.06957	0.00447828	0.038713	2	69	1	65		-278
chr17	21139226	21139703	478	*	NA	intergenic	NA	2.87056	5.31902e-05	0.00189934	3	124	5	195		-477
chr17	25806019	25806319	301	+	8844	intron	KSR1	3.98861	7.89341e-06	0.000418061	1	99	2	161		-300
chr17	26392944	26393349	406	+	51701	intron	NLK	1.88683	0.00101201	0.0150074	7	174	14	247		-405
chr17	26919040	26920074	1035	-	10615	cds	SPAG5	1.2269	0.00101667	0.0150521	94	991	78	1175		-1034
chr17	27028469	27028972	504	+	6830	utr3	SUPT6H	1.51921	0.0064308	0.0484473	10	193	17	222		-503
chr17	28248973	28249249	277	-	85464	intron	SSH2	2.85757	0.00039025	0.00795557	2	88	4	150		-276
chr17	28575632	28576109	478	-	642	utr3	BLMH	2.08875	7.03773e-05	0.00233313	11	243	14	333		-477
chr17	29044430	29044803	374	+	440423	intron	SUZ12P	2.10009	0.00148559	0.0193801	6	210	11	174		-373
chr17	34050686	34051095	410	+	163	utr3	AP2B1	1.83409	0.000109335	0.00320536	22	310	17	446		-409
chr17	38243276	38243679	404	+	7067	intron	THRA	2.93542	7.78851e-05	0.00248841	2	108	5	185		-403
chr17	38544865	38545158	294	-	7153	utr3	TOP2A	1.69979	0.000265871	0.0061393	20	307	24	472		-293
chr17	38545423	38545839	417	-	7153	utr3	TOP2A	1.71486	2.67906e-05	0.00111391	37	599	41	785		-416
chr17	40023229	40023646	418	-	47	utr3	ACLY	2.03829	1.96916e-07	1.80747e-05	47	922	39	966		-417
chr17	40023822	40024113	292	-	47	utr3	ACLY	1.63604	0.000463647	0.00894453	27	344	18	409		-291
chr17	40373936	40374220	285	-	6777	intron	STAT5B	2.69811	1.50177e-07	1.42444e-05	11	298	10	444		-284
chr17	40462582	40462886	305	+	6776	utr3	STAT5A	1.97556	0.000314677	0.00686305	9	197	14	295		-304
chr17	41167618	41168128	511	-	10493	utr3	VAT1	1.57602	0.00226054	0.0251832	16	238	17	292		-510
chr17	42928363	42928676	314	-	9343	utr3	EFTUD2	2.58958	1.12355e-07	1.10801e-05	14	339	12	514		-313
chr17	44122888	44123283	396	*	NA	intergenic	NA	2.44971	0.00520027	0.0425189	1	75	5	102		-395
chr17	44248303	44248826	524	*	NA	intergenic	NA	1.27497	0.00178833	0.0218576	52	532	43	713		-523
chr17	45760111	45760376	266	+	3837	utr3	KPNB1	1.35736	0.00275916	0.0283336	19	356	39	444		-265
chr17	55197637	55197889	253	+	8165	utr3	AKAP1	2.11531	0.00643002	0.0484473	3	89	6	122		-252
chr17	55405530	55405847	318	+	124540	intron	MSI2	2.74288	0.00221449	0.0248535	2	69	3	114		-317
chr17	55726554	55726920	367	+	124540	intron	MSI2	2.15942	0.000270612	0.00619641	8	163	9	251		-366
chr17	55916891	55917228	338	-	51649	utr3	MRPS23	1.89797	0.00439047	0.0381949	10	121	4	162		-337
chr17	56082324	56082631	308	-	6426	utr3	SRSF1	2.87914	3.96303e-12	1.10467e-09	23	770	23	1065		-307
chr17	56405555	56405865	311	+	100506779	intron	LOC100506779	2.8507	0.00346401	0.0326861	2	55	2	104		-310
chr17	56407202	56407407	206	+	100506779	intron	LOC100506779	2.75845	0.00556082	0.0442356	4	68	0	78		-205
chr17	56407613	56407895	283	+	100506779	intron	LOC100506779	1.94601	1.67581e-05	0.000785217	22	428	23	504		-282
chr17	57771225	57771642	418	+	1213	utr3	CLTC	2.10995	3.92231e-07	3.39069e-05	28	547	32	867		-417
chr17	57771834	57772093	260	+	1213	utr3	CLTC	3.65052	5.7126e-18	4.10661e-15	21	948	12	1301		-259
chr17	59869927	59870341	415	-	83990	intron	BRIP1	2.38991	0.00119939	0.0167775	3	117	6	136		-414
chr17	61896833	61897339	507	-	117246	utr3	FTSJ3	1.40078	0.0059435	0.0460331	17	216	20	315		-506
chr17	62289976	62290419	444	-	55852	cds	TEX2	1.20151	0.00601093	0.0463622	37	410	35	480		-443
chr17	62290895	62291189	295	-	55852	cds	TEX2	1.27226	0.00526423	0.0426968	26	307	32	455		-294
chr17	62495783	62496390	608	-	1655	cds	DDX5	1.16149	0.00068907	0.0117646	246	2524	223	3133		-607
chr17	62932329	62932592	264	*	NA	intergenic	NA	2.27028	0.00399802	0.0358759	7	84	1	127		-263
chr17	62937202	62937496	295	*	NA	intergenic	NA	4.2102	9.49378e-07	7.18398e-05	1	137	2	161		-294
chr17	66042648	66042932	285	+	3838	utr3	KPNA2	1.74721	0.000368287	0.00768678	19	277	17	378		-284
chr17	72541310	72541577	268	-	10871	intron	CD300C	3.46262	0.00472982	0.0401053	0	54	2	64		-267
chr17	75465965	75466706	742	+	10801	intron	2014-09-09	2.59376	3.19789e-08	3.70156e-06	18	412	12	571		-741
chr17	76119427	76119763	337	-	11322	intron	TMC6	3.16437	1.72627e-10	3.52528e-08	12	455	8	507		-336
chr17	76220054	76220348	295	+	332	utr3	BIRC5	2.59846	1.93207e-06	0.000131946	10	229	8	367		-294
chr17	78254999	78255442	444	+	57674	intron	RNF213	3.29664	6.74796e-07	5.43758e-05	4	184	4	241		-443
chr17	78519264	78519581	318	+	57521	utr5	RPTOR	1.14028	0.005477	0.043824	50	506	49	675		-317
chr17	78716305	78716710	406	+	57521	intron	RPTOR	3.05633	4.72751e-08	5.22839e-06	8	248	6	388		-405
chr17	78785395	78785746	352	+	57521	intron	RPTOR	2.17246	0.000245584	0.00582346	8	176	9	239		-351
chr17	78814382	78814702	321	+	57521	intron	RPTOR	1.44415	0.00412784	0.0365986	18	254	20	302		-320
chr17	78903943	78904313	371	+	57521	intron	RPTOR	1.2614	0.00203635	0.0236588	48	522	47	712		-370
chr17	79223120	79223324	205	-	124565	intron	SLC38A10	2.42405	5.64157e-12	1.52585e-09	91	2157	81	2836		-204
chr17	79477042	79477299	258	-	71	utr3	ACTG1	2.3284	1.94942e-11	4.88554e-09	99	2243	109	3452		-257
chr17	79477433	79477691	259	-	71	utr3	ACTG1	2.438	3.76598e-13	1.27007e-10	160	4083	181	5962		-258
chr17	79498705	79499102	398	+	25794	intron	FSCN2	2.6488	9.15438e-05	0.00282043	5	122	5	223		-397
chr17	79499266	79499728	463	+	25794	intron	FSCN2	2.35018	0.000138636	0.00380633	4	175	13	299		-462
chr17	80036245	80036829	585	-	2194	utr3	FASN	1.09589	0.00335037	0.031956	227	2464	189	2254		-584
chr17	80104945	80105125	181	-	284001	intron	CCDC57	2.48648	0.00418224	0.0369251	3	82	3	99		-180
chr17	80105250	80105485	236	-	284001	intron	CCDC57	2.89455	7.32862e-06	0.000398004	8	167	2	238		-235
chr17	80105948	80106194	247	-	284001	intron	CCDC57	3.09174	8.16984e-07	6.37644e-05	6	172	4	296		-246
chr17	80106824	80107176	353	-	284001	intron	CCDC57	2.67758	3.17445e-05	0.0012709	7	144	4	242		-352
chr17	80217982	80218408	427	-	1453	intron	CSNK1D	3.95758	1.20986e-21	2.0656e-18	17	1165	17	1708		-426
chr17	80537924	80538195	272	+	3607	intron	FOXK2	3.46611	2.87852e-13	9.95349e-11	14	547	7	709		-271
chr17	80597606	80597896	291	-	56270	intron	WDR45L	3.07617	5.01497e-09	7.09814e-07	5	350	12	420		-290
chr17	80785602	80786260	659	+	6904	intron	TBCD	3.15247	3.70606e-12	1.05457e-09	16	583	12	764		-658
chr17	80786383	80786686	304	+	6904	intron	TBCD	3.11897	1.70537e-06	0.000119144	4	185	5	237		-303
chr17	80786891	80787170	280	+	6904	intron	TBCD	2.4963	0.000547149	0.0100379	5	126	4	147		-279
chr17	80797096	80797417	322	+	6904	intron	TBCD	4.3145	0.00285794	0.0289686	1	43	0	66		-321
chr17	80916716	80917336	621	-	146712	intron	B3GNTL1	3.92623	3.46839e-22	7.28816e-19	18	1522	21	1650		-620
chr17	80942172	80942453	282	-	146712	intron	B3GNTL1	2.11594	0.00289189	0.0291436	4	105	7	154		-281
chr18	180540	180946	407	+	9097	intron	USP14	1.93959	0.00205715	0.023852	7	142	9	190		-406
chr18	211543	211949	407	+	9097	utr3	USP14	1.44675	0.00545325	0.0437349	11	205	23	298		-406
chr18	672866	673401	536	-	55556	utr3	ENOSF1	1.2662	0.00619018	0.0472207	27	412	54	650		-535
chr18	730961	731331	371	-	7525	intron	YES1	2.85474	6.71778e-07	5.42928e-05	11	242	3	306		-370
chr18	2908087	2908635	549	+	84034	intron	EMILIN2	2.16763	0.00473353	0.0401073	6	103	3	114		-548
chr18	8963357	8963731	375	*	NA	intergenic	NA	2.56658	0.00124556	0.0171931	3	93	4	132		-374
chr18	9237956	9238555	600	+	23253	intron	ANKRD12	2.16261	0.00210943	0.0241708	7	118	4	148		-599
chr18	12478315	12478680	366	-	56907	intron	SPIRE1	3.40476	0.000681335	0.0116763	1	68	2	105		-365
chr18	13106272	13106789	518	+	55125	intron	CEP192	3.14928	9.76891e-12	2.56594e-09	11	507	15	747		-517
chr18	21061217	21061890	674	+	8780	utr3	RIOK3	1.32822	0.00440418	0.0382419	30	316	22	388		-673
chr18	23883145	23883412	268	+	6875	intron	TAF4B	3.72796	0.00119949	0.0167775	0	60	2	83		-267
chr18	37290304	37290624	321	-	647946	intron	LOC647946	2.81947	0.00403788	0.0360584	3	58	1	97		-320
chr18	44470552	44470982	431	-	9063	cds	PIAS2	1.55506	0.00277514	0.0284353	13	259	20	257		-430
chr18	46593642	46593849	208	-	54808	intron	DYM	2.75029	6.80331e-05	0.00227358	6	150	3	176		-207
chr18	46723002	46723589	588	-	54808	intron	DYM	2.06768	0.0056518	0.0447248	6	106	4	119		-587
chr18	48473526	48474135	610	+	4200	utr3	ME2	1.96505	3.81976e-06	0.000234482	22	533	36	689		-609
chr18	73917291	73917615	325	*	NA	intergenic	NA	3.35153	2.6193e-05	0.00109573	4	127	1	148		-324
chr18	74116331	74116834	504	-	9658	intron	ZNF516	3.92129	0.000357028	0.00757216	1	66	1	99		-503
chr18	74608356	74608798	443	+	7776	intron	ZNF236	3.15642	0.000556272	0.0101372	4	87	0	106		-442
chr18	76935515	76935848	334	+	374868	intron	ATP9B	4.66483	0.000458042	0.0088677	1	63	0	74		-333
chr19	513799	514241	443	+	91978	intron	C19orf20	1.60934	0.00566863	0.0448061	7	171	16	206		-442
chr19	912333	912758	426	-	91300	intron	C19orf22	2.02153	0.00522784	0.0425703	4	105	7	136		-425
chr19	1389031	1389332	302	+	374291	intron	NDUFS7	5.72886	8.17005e-08	8.2967e-06	0	125	1	160		-301
chr19	1419717	1419967	251	+	26528	intron	DAZAP1	2.20519	0.000134516	0.00373431	8	188	10	262		-250
chr19	2014733	2015079	347	-	55643	intron	BTBD2	3.02338	0.00582077	0.0455083	0	62	3	68		-346
chr19	2101023	2101302	280	-	8943	utr3	AP3D1	2.13264	0.0059174	0.0459221	5	107	4	103		-279
chr19	2200715	2201011	297	+	84444	intron	DOT1L	2.01576	0.0053801	0.0433151	7	116	4	122		-296
chr19	2335354	2335654	301	+	56928	intron	SPPL2B	1.97171	0.00383283	0.0349005	4	124	9	150		-300
chr19	2348830	2349108	279	+	56928	intron	SPPL2B	2.60351	0.00208956	0.0240624	2	72	4	128		-278
chr19	2349789	2350420	632	+	56928	intron	SPPL2B	2.55509	0.000178091	0.00458819	6	117	4	206		-631
chr19	2801960	2802277	318	+	7064	intron	THOP1	3.46671	2.1494e-08	2.60956e-06	5	234	4	304		-317
chr19	2802428	2802682	255	+	7064	intron	THOP1	3.18754	0.000101407	0.00304411	3	88	2	163		-254
chr19	3361642	3362015	374	+	4782	intron	NFIC	2.38512	0.00144954	0.0190624	0	101	9	154		-373
chr19	3444882	3445242	361	+	4782	intron	NFIC	3.53768	0.000295246	0.00660002	1	90	2	96		-360
chr19	4035738	4035979	242	+	51588	intron	PIAS4	2.7141	3.47686e-10	6.88243e-08	20	577	20	851		-241
chr19	4036414	4036931	518	+	51588	intron	PIAS4	2.25543	1.47026e-05	0.000698488	12	258	12	364		-517
chr19	4053415	4053807	393	-	51341	intron	ZBTB7A	3.66031	1.17805e-14	5.36346e-12	16	895	18	1455		-392
chr19	4830937	4831288	352	-	148022	intron	TICAM1	2.97191	5.61454e-05	0.00197391	4	125	3	173		-351
chr19	4999800	5000162	363	+	23030	intron	KDM4B	2.72079	0.000414761	0.00830039	6	114	1	135		-362
chr19	5000244	5000515	272	+	23030	intron	KDM4B	2.66756	0.00145134	0.0190699	3	98	3	106		-271
chr19	5576641	5576901	261	*	NA	intergenic	NA	1.83712	0.00515899	0.042359	7	124	8	166		-260
chr19	5673652	5674124	473	*	NA	intergenic	NA	5.07652	2.92169e-05	0.00118751	1	89	0	92		-472
chr19	5697235	5697591	357	-	9361	intron	LONP1	2.45496	0.000754046	0.0124161	5	132	4	131		-356
chr19	5975731	5976094	364	-	8498	intron	RANBP3	2.24302	0.000829746	0.0131474	6	146	6	158		-363
chr19	6278460	6278764	305	-	4298	intron	MLLT1	2.08563	0.00245697	0.0264141	7	126	5	148		-304
chr19	6362055	6362344	290	+	8192	intron	CLPP	1.90787	0.00349345	0.0328609	4	155	11	143		-289
chr19	6776101	6776397	297	+	7409	intron	VAV1	2.87281	5.33759e-08	5.74043e-06	13	340	5	367		-296
chr19	6776488	6776700	213	+	7409	intron	VAV1	2.37333	0.000781334	0.012697	7	141	3	135		-212
chr19	6777062	6777324	263	+	7409	intron	VAV1	2.71198	0.00111521	0.0159665	3	111	3	97		-262
chr19	6838138	6838652	515	+	7409	intron	VAV1	1.8401	0.0017971	0.0218985	13	200	7	180		-514
chr19	6855486	6855856	371	+	7409	intron	VAV1	3.61826	6.31181e-10	1.13944e-07	5	308	5	351		-370
chr19	7197521	7198025	505	-	3643	intron	INSR	3.49322	7.64578e-06	0.000407929	2	153	3	146		-504
chr19	7228938	7229318	381	-	3643	intron	INSR	3.83476	2.80514e-09	4.18732e-07	4	248	3	289		-380
chr19	7895745	7896516	772	+	115704	intron	EVI5L	2.47847	0.000199343	0.00498213	8	157	3	172		-771
chr19	7969625	7970059	435	+	5609	intron	MAP2K7	2.1384	8.93435e-05	0.00278329	7	242	15	277		-434
chr19	8553676	8553968	293	+	4670	utr3	HNRNPM	2.14319	2.0302e-08	2.50946e-06	46	1006	50	1283		-292
chr19	8591883	8592167	285	-	4542	intron	MYO1F	2.84165	0.00368844	0.0340972	4	79	0	74		-284
chr19	8594116	8594410	295	-	4542	intron	MYO1F	2.97059	0.000775715	0.0126283	4	115	1	92		-294
chr19	8594476	8594961	486	-	4542	intron	MYO1F	2.05012	0.00071355	0.0120193	9	193	8	181		-485
chr19	9523634	9524521	888	-	10781	cds	ZNF266	1.07522	0.00246069	0.0264225	148	1512	153	1910		-887
chr19	10244087	10244365	279	-	1786	utr3	DNMT1	2.06673	2.52044e-06	0.000165906	28	488	20	596		-278
chr19	10400948	10401470	523	+	7087	intron	ICAM5	1.46378	0.000258006	0.00602195	47	640	50	803		-522
chr19	10432665	10432938	274	-	125950	intron	RAVER1	2.31469	6.39223e-05	0.00217998	12	199	5	259		-273
chr19	10487989	10488284	296	-	7297	intron	TYK2	3.05147	0.00486157	0.0408461	1	55	2	80		-295
chr19	10558363	10558684	322	+	5141	intron	PDE4A	2.51522	0.00179629	0.0218985	3	107	4	106		-321
chr19	10573302	10573586	285	+	5141	intron	PDE4A	3.36965	0.000816388	0.0130264	2	64	1	106		-284
chr19	10800134	10800446	313	+	3609	utr3	ILF3	1.29127	0.000687471	0.0117593	78	763	64	1129		-312
chr19	11172468	11172837	370	+	6597	utr3	SMARCA4	1.2893	0.00344854	0.0326416	38	381	28	491		-369
chr19	12125037	12125460	424	*	NA	intergenic	NA	2.09252	0.000281951	0.00637059	11	200	8	236		-423
chr19	13033320	13033656	337	-	2193	utr3	FARSA	1.28048	0.00595219	0.0460612	26	324	28	381		-336
chr19	13109513	13109944	432	+	4784	intron	NFIX	2.15306	0.00225155	0.0251353	6	113	5	152		-431
chr19	13113985	13114353	369	+	4784	intron	NFIX	1.92593	0.000502785	0.00945043	12	228	11	239		-368
chr19	13114920	13115332	413	+	4784	intron	NFIX	3.02446	0.000107466	0.00316683	4	116	2	148		-412
chr19	13210826	13211237	412	-	4066	intron	LYL1	3.036	6.99843e-13	2.27591e-10	20	838	20	919		-411
chr19	14033128	14033601	474	+	54862	intron	CC2D1A	2.03226	0.00354908	0.0331794	6	129	6	133		-473
chr19	14280937	14281331	395	+	100507373	utr	LOC100507373	2.75891	0.000147145	0.00397975	4	155	4	131		-394
chr19	14554658	14555004	347	+	5585	intron	PKN1	3.19966	0.0023492	0.0257414	1	76	2	70		-346
chr19	14555286	14555594	309	+	5585	intron	PKN1	3.07002	0.00100629	0.0149466	2	77	2	105		-308
chr19	14562059	14562489	431	+	5585	intron	PKN1	2.31606	0.000137505	0.00379416	5	167	10	238		-430
chr19	14679857	14680090	234	-	4713	intron	NDUFB7	2.24592	0.00479196	0.0404768	3	80	5	127		-233
chr19	15356958	15357439	482	-	23476	intron	BRD4	2.06291	1.52116e-05	0.000718919	18	358	17	429		-481
chr19	16485610	16486067	458	-	58513	intron	EPS15L1	1.96966	0.00521216	0.0425499	6	123	6	128		-457
chr19	16611669	16612322	654	+	84167	cds	C19orf44	1.50022	0.00334479	0.0319523	19	234	16	301		-653
chr19	16642764	16643158	395	-	10523	intron	CHERP	2.3917	1.03524e-05	0.000520805	12	250	8	317		-394
chr19	17007986	17008323	338	-	27151	intron	CPAMD8	4.65037	0.000538204	0.00992867	0	59	1	76		-337
chr19	18405895	18406315	421	*	NA	intergenic	NA	2.61136	2.75444e-06	0.00017915	6	238	11	324		-420
chr19	18406469	18406742	274	*	NA	intergenic	NA	3.69704	9.18294e-05	0.00282489	1	91	2	119		-273
chr19	18417834	18418246	413	-	25804	utr3	LSM4	1.87196	1.53415e-05	0.000723569	29	445	26	650		-412
chr19	18765072	18765753	682	+	55295	intron	KLHL26	2.52558	7.21647e-06	0.000394265	8	221	9	310		-681
chr19	19107648	19108282	635	-	10147	intron	SUGP2	1.6169	0.00123933	0.017128	15	277	21	315		-634
chr19	19109349	19109897	549	-	10147	intron	SUGP2	1.88768	2.75358e-05	0.00113453	19	421	28	515		-548
chr19	19135476	19135813	338	-	10147	cds	SUGP2	1.24515	0.000487387	0.00923297	140	1535	116	1720		-337
chr19	19135987	19136386	400	-	10147	cds	SUGP2	1.16205	0.000914606	0.0140713	181	1869	153	2145		-399
chr19	19136614	19136997	384	-	10147	cds	SUGP2	1.29817	0.000361058	0.00760467	106	1349	103	1395		-383
chr19	19175086	19175608	523	+	284439	intron	SLC25A42	2.86119	2.43225e-06	0.000160876	5	179	7	298		-522
chr19	20015657	20016034	378	+	81931	intron	ZNF93	1.87943	0.00250551	0.0266341	8	155	9	181		-377
chr19	21767367	21767682	316	*	NA	intergenic	NA	2.92601	1.86362e-13	6.78781e-11	34	1062	23	1271		-315
chr19	21941225	21941551	327	-	163227	intron	ZNF100	2.07023	0.0020678	0.0238876	4	151	9	138		-326
chr19	29066574	29066923	350	*	NA	intergenic	NA	2.23294	0.00195371	0.0230638	9	111	1	144		-349
chr19	29698268	29698567	300	-	7386	utr3	UQCRFS1	1.95981	0.000116533	0.00332984	17	241	12	375		-299
chr19	33948983	33949717	735	-	5184	intron	PEPD	3.02271	1.62218e-09	2.57634e-07	25	682	16	1145		-734
chr19	34671617	34671984	368	+	26065	intron	LSM14A	2.25289	0.000170437	0.00443834	7	187	9	223		-367
chr19	34890950	34891250	301	+	2821	utr3	GPI	2.97956	5.19915e-15	2.53616e-12	37	1448	37	1688		-300
chr19	34960493	34960766	274	+	10054	utr3	UBA2	1.6348	0.000677522	0.0116548	17	322	24	360		-273
chr19	36528050	36528354	305	-	199745	intron	THAP8	4.48341	4.74205e-06	0.000275843	1	100	1	143		-304
chr19	36640795	36641172	378	+	826	utr3	CAPNS1	1.28878	0.00118153	0.0166199	48	648	63	814		-377
chr19	37156688	37156973	286	-	92283	intron	ZNF461	3.49216	0.00381567	0.0348371	2	54	0	68		-285
chr19	38602583	38602927	345	+	23094	intron	SIPA1L3	1.90263	0.00427806	0.0375165	7	110	7	176		-344
chr19	39327052	39327401	350	-	3191	utr3	HNRNPL	1.58349	7.65755e-05	0.0024523	52	690	40	791		-349
chr19	39834015	39834308	294	+	55095	intron	SAMD4B	2.71326	0.00043364	0.00856525	6	108	1	141		-293
chr19	39926939	39927483	545	*	NA	intergenic	NA	3.1121	0.000797564	0.0128689	1	83	3	103		-544
chr19	40330183	40330691	509	-	2091	intron	FBL	2.66458	3.75907e-05	0.00145038	7	170	4	206		-508
chr19	41191267	41192076	810	-	9253	intron	NUMBL	2.32655	1.72812e-07	1.61117e-05	21	494	20	615		-809
chr19	41305816	41306122	307	*	112398	utr3*	EGLN2	2.17748	0.00299286	0.0298103	2	105	8	139		-306
chr19	41332954	41333304	351	*	NA	intergenic	NA	2.20494	2.59792e-05	0.00109349	9	240	15	362		-350
chr19	41778260	41778752	493	+	11100	intron	HNRNPUL1	1.59208	0.005573	0.0443195	6	170	18	220		-492
chr19	41833990	41834574	585	*	90324	utr3*	CCDC97	2.55127	7.17982e-11	1.5566e-08	39	1050	32	1183		-584
chr19	41840729	41841024	296	-	7040	intron	TGFB1	2.30168	0.000507787	0.00951549	10	151	2	167		-295
chr19	41857790	41858238	449	-	7040	intron	TGFB1	1.79451	0.000156891	0.00418536	18	349	22	395		-448
chr19	41861047	41861451	405	-	80776	intron	B9D2	1.50282	0.000381466	0.0078586	47	515	25	581		-404
chr19	41865700	41866050	351	-	80776	intron	B9D2	2.68897	2.12712e-10	4.30419e-08	17	737	28	816		-350
chr19	42392422	42392727	306	+	9138	intron	ARHGEF1	2.83041	0.000507873	0.00951549	0	102	6	127		-305
chr19	42410290	42410563	274	+	9138	intron	ARHGEF1	2.40018	9.93726e-05	0.00300616	4	184	10	212		-273
chr19	42573909	42574177	269	*	NA	intergenic	NA	2.39965	0.00666959	0.0496304	3	79	3	91		-268
chr19	44250431	44250963	533	-	56006	intron	SMG9	2.92864	8.61708e-05	0.00270256	2	131	5	155		-532
chr19	45172778	45173140	363	*	5817	utr3*	PVR	1.92879	0.0018104	0.0219628	10	186	7	156		-362
chr19	45545040	45545351	312	+	11129	intron	CLASRP	2.20538	0.000759564	0.0124844	5	156	8	164		-311
chr19	45561991	45562309	319	+	11129	intron	CLASRP	2.50996	0.000915945	0.0140804	4	104	4	143		-318
chr19	46199318	46199640	323	+	54814	intron	QPCTL	2.1815	0.000314012	0.00686305	9	181	7	209		-322
chr19	46365827	46366148	322	-	8189	intron	SYMPK	1.44515	0.00594346	0.0460331	17	214	16	271		-321
chr19	46405269	46405727	459	-	339344	intron	MYPOP	2.36315	0.00442398	0.0383285	3	95	4	97		-458
chr19	47616535	47616934	400	-	23211	intron	ZC3H4	3.20813	0.00290393	0.029196	0	82	3	63		-399
chr19	47713034	47713356	323	+	10055	utr3	SAE1	1.45743	0.00152246	0.0196731	21	327	31	446		-322
chr19	47993362	47993670	309	+	100505681	intron	LOC100505681	3.71166	1.35579e-10	2.82719e-08	4	284	6	429		-308
chr19	50096988	50097568	581	+	57479	intron	PRR12	2.22627	0.000623249	0.010977	5	136	8	194		-580
chr19	51739961	51740365	405	+	945	intron	CD33	2.54791	9.28209e-11	1.98093e-08	42	1024	27	1141		-404
chr19	51998273	51998647	375	-	89858	intron	SIGLEC12	2.58952	0.00149265	0.0194166	14	362	6	271		-374
chr19	52207829	52208205	377	+	147650	intron	LINC00085	2.31074	0.00123385	0.0170832	6	135	4	129		-376
chr19	53394717	53395148	432	*	NA	intergenic	NA	1.83361	0.000913793	0.0140713	8	203	16	258		-431
chr19	53591165	53591625	461	-	90338	intron	ZNF160	1.50117	0.00290688	0.029196	22	282	15	276		-460
chr19	54062146	54062730	585	+	55422	intron	ZNF331	2.56475	1.63063e-07	1.53072e-05	13	342	13	494		-584
chr19	54063139	54063375	237	+	55422	intron	ZNF331	2.33201	0.00504762	0.0417962	6	92	1	97		-236
chr19	54467416	54467991	576	+	59283	intron	CACNG8	1.69224	0.000115776	0.00331516	25	478	32	506		-575
chr19	54479637	54479909	273	+	59283	intron	CACNG8	2.90693	0.000824232	0.0130904	2	90	3	112		-272
chr19	54966519	54966747	229	+	114823	cds	LENG8	1.48969	0.000193657	0.00487951	48	710	50	762		-228
chr19	54969775	54970041	267	+	114823	intron	LENG8	1.68313	3.23402e-06	0.000205451	79	1382	100	1715		-266
chr19	55520287	55520576	290	*	NA	intergenic	NA	2.14726	0.00233651	0.025664	9	128	2	133		-289
chr19	55522514	55522835	322	*	NA	intergenic	NA	3.37439	4.94813e-07	4.10845e-05	4	234	4	205		-321
chr19	55769405	55769709	305	-	22870	intron	PPP6R1	2.64486	8.95348e-05	0.00278329	4	158	6	177		-304
chr19	55851594	55852095	502	+	84787	intron	SUV420H2	2.64266	0.000762504	0.0125176	4	117	3	116		-501
chr19	56172715	56173022	308	+	11338	intron	U2AF2	2.44241	5.14181e-07	4.23069e-05	16	379	12	439		-307
chr19	56173350	56173655	306	+	11338	intron	U2AF2	1.44661	0.000707399	0.0119816	32	456	39	589		-305
chr19	56185733	56186021	289	+	11338	utr3	U2AF2	1.22128	0.0056422	0.0446754	33	404	36	459		-288
chr19	56660394	56660686	293	+	55311	intron	ZNF444	4.65556	9.21143e-07	7.02873e-05	1	116	1	157		-292
chr19	56670223	56670763	541	+	55311	intron	ZNF444	3.18878	7.30563e-09	9.92875e-07	6	289	8	403		-540
chr19	56671642	56671932	291	+	55311	utr3	ZNF444	2.00541	0.000240246	0.00572171	14	228	9	269		-290
chr19	56785021	56785396	376	*	NA	intergenic	NA	2.10752	0.00107513	0.0155147	7	142	7	184		-375
chr19	58763560	58764011	452	+	27300	intron	ZNF544	1.96087	5.54065e-06	0.000313362	38	637	22	606		-451
chr19	59061793	59062071	279	+	10155	utr3	TRIM28	1.23721	0.00165438	0.0207401	43	717	80	839		-278
chr20	400622	401192	571	+	10616	intron	RBCK1	1.81539	6.23878e-05	0.00213297	21	399	26	492		-570
chr20	1100424	1101169	746	+	9491	intron	PSMF1	2.70124	0.000110483	0.00322054	4	159	5	152		-745
chr20	3989901	3990334	434	-	11237	intron	RNF24	1.50383	0.005082	0.0419225	14	190	16	272		-433
chr20	8146532	8147424	893	+	23236	intron	PLCB1	2.23913	3.97428e-05	0.00151627	12	238	9	297		-892
chr20	8437970	8438455	486	+	23236	intron	PLCB1	3.63563	0.00194106	0.0229763	1	64	1	69		-485
chr20	16721594	16721846	253	+	6629	utr3	SNRPB2	1.95178	0.00546354	0.0437737	9	103	3	150		-252
chr20	18541342	18541756	415	+	10483	utr3	SEC23B	2.46541	0.0044885	0.0387768	4	67	2	115		-414
chr20	21369986	21370342	357	+	22803	utr3	XRN2	2.05395	0.000117825	0.00336325	12	199	12	348		-356
chr20	31437810	31438093	284	+	22919	utr3	MAPRE1	1.61216	0.00321977	0.0311976	10	175	17	275		-283
chr20	31960884	31961146	263	-	51654	intron	CDK5RAP1	3.20302	2.32355e-05	0.00101071	3	124	3	176		-262
chr20	32603632	32603985	354	+	22913	intron	RALY	2.53233	0.000224505	0.00545622	6	140	4	172		-353
chr20	32677271	32677564	294	-	8894	utr3	EIF2S2	2.39627	1.68359e-06	0.000118228	7	317	19	422		-293
chr20	32868164	32868464	301	-	191	utr3	AHCY	2.71881	4.32113e-07	3.6545e-05	10	265	8	379		-300
chr20	32868568	32868862	295	-	191	utr3	AHCY	1.78251	0.000241094	0.00573191	12	285	25	405		-294
chr20	34291587	34291889	303	-	9584	utr3	RBM39	1.64421	0.000239633	0.00571707	26	386	27	510		-302
chr20	35249352	35249756	405	-	84174	intron	SLA2	2.32283	0.00186692	0.0223286	4	115	5	126		-404
chr20	35485268	35485819	552	-	140710	intron	KIAA0889	3.07782	2.18513e-13	7.75209e-11	22	891	19	962		-551
chr20	36013388	36013699	312	+	6714	intron	SRC	3.51871	8.25388e-10	1.44533e-07	7	306	4	374		-311
chr20	36640007	36640565	559	-	9675	cds	TTI1	1.32551	0.00213355	0.0243451	39	460	33	507		-558
chr20	36640742	36641097	356	-	9675	cds	TTI1	1.26728	0.00669933	0.0497568	32	309	21	379		-355
chr20	39751892	39752518	627	+	7150	utr3	TOP1	1.2091	0.00520184	0.0425191	34	410	41	526		-626
chr20	48329381	48329875	495	-	9334	intron	B4GALT5	2.70547	1.40791e-06	0.000102015	9	251	7	312		-494
chr20	49288253	49288570	318	*	NA	intergenic	NA	4.40978	0.00106448	0.0154507	2	135	2	340		-317
chr20	55004366	55004875	510	+	57091	intron	CASS4	2.05668	0.0045084	0.0388873	8	159	5	126		-509
chr20	57067821	57068181	361	-	164284	intron	APCDD1L	4.25087	0.0041002	0.0364481	0	42	1	61		-360
chr20	57485781	57486199	419	+	2778	utr3	GNAS	1.55919	3.37004e-05	0.0013189	67	926	70	1261		-418
chr20	58634266	58634507	242	+	284756	intron	C20orf197	3.91272	0.00546689	0.0437816	1	49	1	119		-241
chr20	58634657	58634902	246	+	284756	intron	C20orf197	4.30103	0.00325333	0.0314132	0	42	1	65		-245
chr20	58889559	58889829	271	*	NA	intergenic	NA	3.50674	0.00371107	0.0342252	1	57	1	65		-270
chr20	59075516	59075836	321	*	NA	intergenic	NA	3.12078	1.94481e-08	2.41483e-06	7	270	7	392		-320
chr20	59075987	59076284	298	*	NA	intergenic	NA	2.46399	1.62248e-06	0.00011423	13	291	10	397		-297
chr20	59108784	59109285	502	*	NA	intergenic	NA	2.07461	6.65281e-05	0.00224364	12	260	14	331		-501
chr20	62258993	62259413	421	*	NA	intergenic	NA	2.27344	0.00255524	0.02694	5	116	4	116		-420
chr20	62309909	62310261	353	+	51750	intron	RTEL1	3.25827	4.93929e-10	9.24154e-08	8	332	8	502		-352
chr20	62354367	62354661	295	+	84619	intron	ZGPAT	3.36138	0.000912168	0.0140619	0	63	3	105		-294
chr20	62579886	62580092	207	-	54963	intron	UCKL1	3.97528	4.76558e-15	2.36693e-12	5	585	9	587		-206
chr21	9698853	9699096	244	*	NA	intergenic	NA	1.29655	0.00355652	0.0332262	27	369	37	480		-243
chr21	9700254	9700487	234	*	NA	intergenic	NA	1.51918	0.000524446	0.00978049	26	445	36	508		-233
chr21	9941190	9941469	280	-	100132288	intron	TEKT4P2	2.71865	6.34019e-10	1.13944e-07	20	513	17	818		-279
chr21	10919145	10919485	341	-	7179	intron	TPTE	1.91902	0.00521993	0.0425603	7	123	6	141		-340
chr21	10961245	10961774	530	-	7179	intron	TPTE	1.99738	0.000481617	0.00918116	12	171	8	265		-529
chr21	11038817	11039417	601	*	NA	antisense	NA	1.03442	0.00354425	0.0331683	171	1619	145	1857		-600
chr21	11101786	11102145	360	*	NA	intergenic	NA	2.10196	4.80848e-06	0.000278291	14	460	26	453		-359
chr21	15470273	15470663	391	*	NA	intergenic	NA	3.00845	0.00119018	0.01669	12	265	7	585		-390
chr21	15885737	15886216	480	-	64092	intron	SAMSN1	1.49836	0.000711138	0.0120097	34	394	25	507		-479
chr21	21506821	21507155	335	*	NA	intergenic	NA	2.51652	1.73717e-06	0.000120749	10	300	11	345		-334
chr21	21592852	21593296	445	*	NA	intergenic	NA	2.20303	0.00167925	0.0209453	5	134	6	136		-444
chr21	25327689	25328111	423	*	NA	intergenic	NA	3.20569	9.10694e-05	0.00281736	2	96	3	156		-422
chr21	33040880	33041188	309	+	6647	utr3	SOD1	3.26841	3.33109e-12	9.57847e-10	18	779	21	1276		-308
chr21	34948770	34949153	384	+	6651	utr3	SON	1.20302	0.00183619	0.0221355	74	699	61	989		-383
chr21	34949298	34949696	399	+	6651	utr3	SON	1.29505	0.000685936	0.0117404	76	744	63	1114		-398
chr21	36161449	36161743	295	-	861	utr3	RUNX1	2.63512	4.44788e-05	0.0016482	11	358	9	298		-294
chr21	36260636	36260860	225	-	861	utr5	RUNX1	1.55465	0.00151604	0.0196367	16	311	24	315		-224
chr21	36347907	36348295	389	-	861	intron	RUNX1	1.56912	0.00129458	0.017709	22	303	18	333		-388
chr21	38574615	38575337	723	+	7267	utr3	TTC3	1.34499	0.00256896	0.0270533	28	331	33	514		-722
chr21	39845618	39845898	281	-	2078	intron	ERG	2.27606	0.000958846	0.0144594	8	132	3	155		-280
chr21	40554292	40554756	465	-	8624	intron	PSMG1	1.65195	0.00656802	0.0491213	10	163	10	173		-464
chr21	40714343	40714624	282	-	3150	utr3	HMGN1	1.72888	5.15919e-06	0.000296079	65	852	53	1279		-281
chr21	42554547	42555268	722	+	25825	intron	BACE2	2.17105	5.5189e-07	4.52732e-05	26	581	23	597		-721
chr21	43339151	43339406	256	-	25966	intron	C2CD2	4.93246	7.98918e-05	0.00253359	1	63	0	105		-255
chr21	44260389	44260744	356	*	NA	intergenic	NA	3.65868	2.25702e-22	5.605e-19	38	1951	31	2784		-355
chr21	44260864	44261176	313	*	NA	intergenic	NA	3.74171	2.35986e-21	3.79202e-18	27	1473	21	2008		-312
chr21	45354653	45354957	305	+	56894	intron	AGPAT3	3.61676	1.72928e-10	3.52528e-08	6	328	5	399		-304
chr21	45567461	45567726	266	*	8209	utr3*	C21orf33	2.45459	0.00247466	0.0264995	4	84	3	125		-265
chr21	45731051	45731389	339	+	5211	intron	PFKL	3.39736	4.69739e-18	3.56441e-15	30	1311	24	1772		-338
chr21	46575941	46576353	413	+	104	intron	ADARB1	2.72877	1.00977e-05	0.000511759	7	163	5	273		-412
chr21	46927978	46928377	400	+	80781	intron	COL18A1	4.37595	3.55602e-16	2.20772e-13	7	469	3	660		-399
chr21	46949528	46950256	729	-	6573	intron	SLC19A1	3.69418	8.20983e-26	3.7378e-22	76	4148	64	5676		-728
chr21	47612544	47612802	259	-	4047	intron	LSS	2.4897	2.09956e-07	1.91179e-05	18	447	11	419		-258
chr21	47612947	47613183	237	-	4047	intron	LSS	3.15133	6.29073e-09	8.67898e-07	7	359	8	350		-236
chr21	47613401	47613704	304	-	4047	intron	LSS	2.90927	4.38893e-06	0.000262347	37	1169	17	976		-303
chr21	47791764	47792241	478	+	5116	intron	PCNT	2.90798	3.52215e-07	3.10369e-05	9	250	5	318		-477
chr21	47834363	47834802	440	+	5116	intron	PCNT	3.24888	2.9053e-09	4.28995e-07	10	354	4	357		-439
chr22	16158896	16159140	245	*	NA	intergenic	NA	2.59997	0.000132694	0.0036941	1	131	9	198		-244
chr22	20850469	20850809	341	*	NA	intergenic	NA	2.87974	0.000125917	0.00354239	3	122	4	156		-340
chr22	23523619	23524028	410	+	613	cds	BCR	1.0914	0.00305944	0.0301969	85	1177	130	1272		-409
chr22	23524130	23524405	276	+	613	cds	BCR	1.15838	0.00495965	0.0413814	35	528	63	649		-275
chr22	23548907	23549077	171	+	613	intron	BCR	3.70777	0.00127182	0.0174497	1	54	1	89		-170
chr22	23549129	23549368	240	+	613	intron	BCR	3.00201	1.01385e-07	1.01078e-05	7	239	7	373		-239
chr22	23623046	23623353	308	+	613	intron	BCR	2.28628	2.53591e-05	0.00107401	8	257	13	292		-307
chr22	24312452	24312841	390	+	100037417	intron	DDTL	1.69814	0.0012997	0.0177497	10	199	19	314		-389
chr22	25902961	25903255	295	*	NA	intergenic	NA	3.14335	0.000614795	0.0108561	3	81	1	111		-294
chr22	30730178	30730583	406	-	10291	utr3	SF3A1	1.50032	0.00566598	0.044801	15	178	14	269		-405
chr22	31491781	31492487	707	+	6525	intron	SMTN	2.32978	6.1456e-06	0.000342611	15	279	9	375		-706
chr22	32025249	32025583	335	-	23761	intron	PISD	4.03248	4.3594e-13	1.45226e-10	6	390	4	494		-334
chr22	32783613	32784056	444	-	51493	utr3	C22orf28	2.33828	0.000111589	0.00323253	6	172	9	239		-443
chr22	35445329	35445690	362	*	NA	intergenic	NA	3.37864	2.12303e-05	0.000943005	3	132	2	147		-361
chr22	35446101	35446437	337	*	NA	intergenic	NA	2.07476	0.00263866	0.0275747	8	130	4	141		-336
chr22	35739221	35739720	500	+	10043	intron	TOM1	3.08014	3.92117e-07	3.39069e-05	6	206	5	300		-499
chr22	35834367	35834643	277	*	NA	intergenic	NA	3.4218	4.43521e-05	0.0016482	2	102	3	193		-276
chr22	35834759	35835289	531	*	NA	intergenic	NA	2.90409	1.28709e-06	9.37582e-05	8	356	16	629		-530
chr22	37627520	37627780	261	-	5880	intron	RAC2	2.41315	0.00186491	0.0223144	1	110	7	117		-260
chr22	38521096	38521367	272	-	8398	intron	PLA2G6	2.15096	0.0044779	0.038713	10	153	9	314		-271
chr22	38767533	38768040	508	-	400927	intron	LOC400927	3.67006	0.000110191	0.00322054	2	97	1	108		-507
chr22	39978947	39979396	450	+	8911	intron	CACNA1I	2.77649	3.57358e-07	3.13889e-05	10	320	7	299		-449
chr22	40346019	40346327	309	+	9402	intron	GRAP2	2.68826	0.00297974	0.0297397	8	173	1	133		-308
chr22	40364425	40365013	589	+	9402	intron	GRAP2	2.20979	0.000448205	0.00874544	18	444	15	361		-588
chr22	41924653	41924964	312	+	50	utr3	ACO2	1.68291	0.0014979	0.0194517	10	212	19	292		-311
chr22	42059730	42060039	310	+	2547	utr3	XRCC6	3.57683	6.34296e-14	2.62531e-11	9	561	11	728		-309
chr22	44541980	44542310	331	+	29780	intron	PARVB	3.83883	4.2565e-10	8.1311e-08	3	264	5	355		-330
chr22	45128591	45128949	359	+	55615	intron	PRR5	2.50792	5.37052e-05	0.00190993	8	170	5	231		-358
chr22	46239581	46239846	266	+	25814	utr3	ATXN10	3.08501	1.19527e-09	1.94174e-07	7	350	12	527		-265
chr22	46621465	46622013	549	+	5465	intron	PPARA	2.6087	2.94179e-05	0.0011923	6	204	11	365		-548
chr22	47038836	47039212	377	+	23151	intron	GRAMD4	2.56139	0.000172552	0.00447635	5	122	5	201		-376
chr22	47399407	47399901	495	+	25771	intron	TBC1D22A	3.0423	5.93976e-07	4.82906e-05	9	202	2	292		-494
chr22	47400467	47400748	282	+	25771	intron	TBC1D22A	2.54938	0.0028927	0.0291436	2	72	4	120		-281
chr22	47401264	47401583	320	+	25771	intron	TBC1D22A	3.57917	2.38336e-05	0.00103179	1	111	3	147		-319
chr22	47405178	47405581	404	+	25771	intron	TBC1D22A	3.92095	6.5317e-08	6.78427e-06	2	169	3	242		-403
chr22	47554600	47554814	215	+	25771	intron	TBC1D22A	4.56642	0.00116177	0.0164602	1	42	0	90		-214
chr22	47554935	47555197	263	+	25771	intron	TBC1D22A	3.75935	4.33976e-06	0.000259977	2	122	2	172		-262
chr22	47555309	47555576	268	+	25771	intron	TBC1D22A	3.856	2.52445e-05	0.00107081	1	91	2	146		-267
chr22	48043165	48043704	540	*	NA	intergenic	NA	3.08126	3.9576e-10	7.72213e-08	12	402	9	563		-539
chr22	48051711	48052069	359	*	NA	intergenic	NA	2.23331	0.00195161	0.0230589	8	106	2	150		-358
chr22	48160684	48161158	475	*	NA	intergenic	NA	3.49612	7.99497e-12	2.12038e-09	8	452	8	517		-474
chr22	50776914	50777302	389	*	NA	intergenic	NA	4.26909	0.00383164	0.0349005	0	48	1	55		-388
chr22	51140382	51140698	317	+	85358	intron	SHANK3	2.88485	0.00093394	0.0142081	2	80	3	121		-316
chr22	51154590	51154880	291	+	85358	intron	SHANK3	3.50464	0.00370332	0.0341653	1	52	1	71		-290
chr22	51155063	51155359	297	+	85358	intron	SHANK3	2.51205	0.000271709	0.00621631	4	138	6	169		-296
chrX	3740913	3741397	485	-	389906	intron	LOC389906	3.38694	7.63405e-17	5.21348e-14	25	1112	19	1370		-484
chrX	7994965	7995481	517	*	NA	intergenic	NA	3.46495	0.00441442	0.03827	1	45	1	76		-516
chrX	12840949	12841286	338	+	5634	utr3	PRPS2	2.70794	1.36013e-05	0.000655283	6	204	6	215		-337
chrX	16862840	16863133	294	-	5931	utr3	RBBP7	2.15676	2.20593e-05	0.000968802	14	282	13	369		-293
chrX	19377672	19377969	298	+	5160	utr3	PDHA1	1.72101	0.000678326	0.0116613	11	251	22	337		-297
chrX	22012666	22012927	262	+	6611	utr3	SMS	3.05633	2.30506e-10	4.62995e-08	8	430	15	607		-261
chrX	23721819	23722082	264	-	23597	utr3	ACOT9	4.09488	0.00065759	0.0113836	2	104	0	76		-263
chrX	24094866	24095263	398	+	1968	utr3	EIF2S3	1.28615	0.00235832	0.0257919	48	446	31	598		-397
chrX	24096478	24096842	365	+	1968	utr3	EIF2S3	2.00628	7.8969e-06	0.000418061	24	443	21	530		-364
chrX	25013986	25014358	373	+	5422	utr3	POLA1	3.93494	0.000328767	0.00708813	1	69	1	97		-372
chrX	40465038	40465643	606	+	10159	utr3	ATP6AP2	1.96105	1.55737e-05	0.000732232	25	438	19	480		-605
chrX	48325557	48326012	456	-	92745	intron	SLC38A5	2.3742	0.000122167	0.00345826	9	195	5	192		-455
chrX	48435868	48436329	462	+	5935	utr3	RBM3	1.42649	0.00067051	0.0115633	32	480	46	655		-461
chrX	48436443	48436642	200	+	5935	utr3	RBM3	1.98507	0.00343629	0.0325483	6	121	7	157		-199
chrX	48645327	48646095	769	+	2623	intron	GATA1	2.77644	1.73501e-13	6.40477e-11	43	1226	41	1915		-768
chrX	48651754	48652064	311	+	2623	intron	GATA1	1.89464	0.000737825	0.0122748	14	232	18	422		-310
chrX	48830968	48831425	458	-	56850	intron	GRIPAP1	2.94094	0.00215381	0.0244944	2	68	2	99		-457
chrX	53113181	53113560	380	+	64061	intron	TSPYL2	3.52805	0.000302957	0.0066741	2	87	1	99		-379
chrX	53406549	53407039	491	-	8243	utr3	SMC1A	1.55017	0.00367411	0.0340107	13	200	17	276		-490
chrX	53501017	53501353	337	*	NA	intergenic	NA	3.31027	1.09941e-09	1.82016e-07	8	335	6	414		-336
chrX	55027152	55027745	594	+	27301	intron	APEX2	2.56209	1.86407e-05	0.000851634	11	195	3	253		-593
chrX	56789173	56789439	267	+	550643	intron	LOC550643	3.03534	0.00125289	0.017268	2	78	2	99		-266
chrX	56792747	56792993	247	+	550643	intron	LOC550643	3.08865	0.006444	0.0484532	3	46	0	96		-246
chrX	56809246	56809519	274	+	550643	intron	LOC550643	3.4932	1.25563e-06	9.2453e-05	4	162	2	203		-273
chrX	56813553	56813844	292	+	550643	intron	LOC550643	2.34355	0.000921527	0.014121	6	105	4	173		-291
chrX	56824206	56824467	262	+	550643	intron	LOC550643	2.86787	0.000350509	0.00745704	5	101	1	137		-261
chrX	57247608	57248098	491	*	NA	intergenic	NA	2.56243	1.97038e-05	0.000889666	5	187	9	261		-490
chrX	57248316	57248828	513	*	NA	intergenic	NA	2.26982	0.000683251	0.0117018	4	141	8	170		-512
chrX	64741380	64741903	524	-	81887	intron	LAS1L	1.74233	0.000930327	0.0141976	13	245	16	275		-523
chrX	64814819	64815280	462	*	NA	intergenic	NA	2.22936	0.00133966	0.0180629	4	106	7	176		-461
chrX	64825094	64825681	588	*	NA	intergenic	NA	1.82125	0.00361995	0.0336771	8	131	9	196		-587
chrX	64961433	64961717	285	+	4478	utr3	MSN	2.26232	7.90153e-10	1.39256e-07	50	1280	70	1846		-284
chrX	65239141	65239442	302	*	407008	utr3*	MIR223	1.46948	0.00610497	0.0468453	15	222	16	237		-301
chrX	73345258	73345966	709	-	100302692	intron	FTX	2.40354	0.000225734	0.00547864	7	151	5	192		-708
chrX	77381428	77381756	329	+	5230	utr3	PGK1	2.91194	1.25916e-14	5.63877e-12	37	1405	43	1850		-328
chrX	78615962	78616345	384	-	9452	utr3	ITM2A	2.57284	0.00250658	0.0266341	4	85	2	108		-383
chrX	79552163	79552479	317	*	NA	intergenic	NA	2.81606	0.00424417	0.0372911	2	63	2	90		-316
chrX	80369653	80369976	324	-	79366	utr3	HMGN5	2.8954	0.0008465	0.0133202	3	76	2	128		-323
chrX	96299364	96299888	525	+	1730	intron	DIAPH2	4.35497	0.00240984	0.0261644	1	53	0	57		-524
chrX	102930514	102931019	506	-	9643	utr3	MORF4L2	1.18957	0.00160804	0.0204215	88	884	74	1110		-505
chrX	106360300	106360822	523	-	55285	intron	RBM41	2.01135	0.00055498	0.010134	10	172	9	244		-522
chrX	109380405	109380881	477	+	84187	intron	TMEM164	2.21516	0.00148846	0.0193897	7	126	4	149		-476
chrX	112954416	112954831	416	*	NA	intergenic	NA	2.09422	0.000162941	0.00430886	11	197	10	291		-415
chrX	112971000	112971567	568	*	NA	intergenic	NA	1.73836	0.000167698	0.00438795	22	350	23	462		-567
chrX	113079913	113080176	264	*	NA	intergenic	NA	2.34074	0.00477342	0.0403529	6	89	1	102		-263
chrX	113256292	113256569	278	*	NA	intergenic	NA	1.9579	0.00405459	0.0361368	8	124	5	148		-277
chrX	118377230	118377567	338	+	10857	utr3	PGRMC1	2.18207	0.00129641	0.0177248	7	147	5	143		-337
chrX	118604929	118605248	320	+	292	utr3	SLC25A5	2.5115	2.0987e-08	2.57032e-06	19	468	18	679		-319
chrX	123014784	123015202	419	+	331	intron	XIAP	2.99495	0.000438009	0.00862038	3	88	2	129		-418
chrX	129217675	129218079	405	-	2000	intron	ELF4	2.36049	5.96508e-05	0.00206787	11	197	5	247		-404
chrX	132061900	132062162	263	-	90161	intron	HS6ST2	Inf	0.000213311	0.00526378	0	54	0	68		-262
chrX	133634124	133634655	532	+	3251	utr3	HPRT1	1.75383	3.17941e-05	0.0012709	40	499	25	691		-531
chrX	135992192	135992729	538	*	NA	intergenic	NA	2.60621	2.60812e-07	2.33593e-05	9	329	14	427		-537
chrX	137750905	137751296	392	-	2258	intron	FGF13	3.55161	0.0028823	0.0291225	2	61	0	65		-391
chrX	138057738	138058041	304	-	2258	intron	FGF13	2.34377	0.00484636	0.0407348	5	98	2	91		-303
chrX	138110579	138110918	340	-	2258	intron	FGF13	2.76377	0.00198292	0.0232378	1	67	4	119		-339
chrX	139002902	139003308	407	*	NA	intergenic	NA	3.36865	0.00653853	0.0489914	2	37	0	78		-406
chrX	152481611	152481990	380	-	4100	utr3	MAGEA1	2.96295	1.45703e-08	1.86862e-06	9	336	9	421		-379
chrX	154005418	154005843	426	+	1736	utr3	DKC1	1.35278	0.00108405	0.015614	42	524	44	661		-425
chrX	154007007	154007564	558	-	4354	utr3	MPP1	1.18384	0.00445643	0.0385608	41	524	51	597		-557
chrX	154465540	154466064	525	+	7411	intron	VBP1	2.42757	0.00566634	0.044801	4	79	2	95		-524
chrX	154467446	154467712	267	+	7411	utr3	VBP1	2.32446	0.00532178	0.0430439	4	85	3	104		-266
chrY	13343374	13343643	270	*	NA	intergenic	NA	3.38073	0.000453667	0.00881425	7	235	6	517		-269
chrY	15030045	15030441	397	+	8653	utr3	DDX3Y	1.13936	0.00187197	0.0223402	117	1165	95	1344		-396
chrY	21071520	21072169	650	*	NA	intergenic	NA	1.52714	0.000917559	0.0140973	21	335	29	444		-649
chrY	21076599	21076839	241	*	NA	intergenic	NA	2.00048	0.0057163	0.0449876	6	95	5	145		-240
chrY	21107158	21107582	425	-	83869	intron	TTTY14	1.6444	0.00108804	0.0156513	12	271	23	316		-424
chrY	21138775	21139252	478	-	83869	intron	TTTY14	1.98785	0.0003597	0.00760467	8	213	14	256		-477
chrY	21176311	21176648	338	-	83869	intron	TTTY14	3.54824	4.12475e-19	3.88537e-16	30	1318	18	1721		-337
chrY	21207275	21207588	314	-	83869	intron	TTTY14	3.69109	2.47993e-19	2.60555e-16	24	1083	14	1590		-313
chrY	21209013	21209293	281	-	83869	intron	TTTY14	2.53861	4.47574e-07	3.76197e-05	14	333	10	420		-280
chrY	21864742	21865323	582	*	NA	intergenic	NA	1.37446	0.00535663	0.0432228	16	259	26	328		-581
chrY	22754230	22754508	279	+	9086	utr3	EIF1AY	2.24085	0.00120855	0.0168438	6	106	5	179		-278
chr13	20346394	20346684	291	-	55269	cds	PSPC1	1.96748	0.00049366	0.00933239	15	184	6	263		-290
chr13	27661170	27661609	440	-	219333	intron	USP12	4.04292	0.000166253	0.00436266	0	70	2	109		-439
chr13	31035205	31035476	272	-	3146	utr3	HMGB1	1.90962	7.84806e-07	6.1605e-05	48	897	50	1085		-271
chr13	31710861	31711297	437	-	10808	utr3	HSPH1	1.98954	1.74329e-06	0.000120866	35	583	28	771		-436
chr13	33110001	33110447	447	-	10443	cds	N4BP2L2	1.25905	0.00198046	0.023219	56	540	41	717		-446
chr13	33110638	33111150	513	-	10443	cds	N4BP2L2	1.13973	0.00367269	0.0340091	61	624	66	896		-512
chr13	46700121	46700606	486	-	3936	utr3	LCP1	1.32717	0.00233864	0.0256668	34	339	33	583		-485
chr13	46701328	46701685	358	-	3936	utr3	LCP1	1.86571	0.000499375	0.0094125	22	255	13	446		-357
chr13	52500040	52500291	252	*	NA	intergenic	NA	3.67975	1.08059e-06	8.04316e-05	2	146	3	201		-251
chr13	52548702	52549257	556	-	540	cds	ATP7B	1.51439	0.00103874	0.0152802	21	341	29	429		-555
chr13	98674069	98674365	297	+	3843	utr3	IPO5	3.25565	2.64188e-09	3.9872e-07	7	321	7	400		-296
chr13	98674398	98674695	298	+	3843	utr3	IPO5	1.99166	0.0003405	0.00727243	9	203	13	270		-297
chr13	99857997	99858214	218	+	337867	intron	UBAC2	3.26853	7.4688e-14	3.00037e-11	9	790	23	857		-217
chr13	108157376	108157991	616	-	728215	intron	FAM155A	3.10636	0.000820485	0.0130613	2	90	2	94		-615
chr13	108332996	108333291	296	-	728215	intron	FAM155A	3.74525	4.82243e-07	4.02858e-05	4	143	1	224		-295
chr13	113539269	113539578	310	+	23250	utr3	ATP11A	2.48234	0.00109168	0.015679	4	95	4	149		-309
chr13	113886549	113886773	225	+	8451	intron	CUL4A	2.45377	0.000763012	0.0125184	3	120	6	145		-224
chr13	113918566	113918954	389	+	8451	utr3	CUL4A	1.75368	0.000795116	0.0128662	18	218	11	314		-388
chr13	114796230	114797053	824	-	22821	intron	RASA3	2.67259	8.252e-08	8.34889e-06	18	454	17	769		-823
chr13	114882290	114882536	247	-	22821	intron	RASA3	4.0302	0.000180492	0.00463393	0	67	2	111		-246
chr13	114882597	114882823	227	-	22821	intron	RASA3	4.46972	5.40032e-06	0.000307976	1	102	1	138		-226
chr13	114882932	114883257	326	-	22821	intron	RASA3	4.33873	5.2259e-09	7.35855e-07	2	171	2	271		-325
chr14	21679078	21679338	261	-	3183	utr3	HNRNPC	1.37011	0.000574864	0.0103965	50	588	54	875		-260
chr14	21819705	21819971	267	-	11198	utr3	SUPT16H	2.1965	0.000397472	0.00806069	3	159	12	212		-266
chr14	21820593	21820884	292	-	11198	utr3	SUPT16H	1.59872	0.00104916	0.0153673	17	248	22	397		-291
chr14	23548782	23549086	305	-	22985	cds	ACIN1	1.47085	0.0039696	0.0357076	16	251	20	284		-304
chr14	23549546	23549965	420	-	22985	cds	ACIN1	1.64237	0.000194484	0.0048875	26	444	31	511		-419
chr14	26224471	26224973	503	*	NA	intergenic	NA	2.15681	0.00219143	0.0247267	6	112	5	154		-502
chr14	34911850	34912352	503	-	171546	intron	SPTSSA	2.45085	0.00135651	0.0182181	4	96	4	142		-502
chr14	41535115	41535697	583	*	NA	intergenic	NA	2.3457	0.00482557	0.040639	2	83	5	109		-582
chr14	53194275	53194680	406	+	5706	utr3	PSMC6	2.2475	0.00037374	0.00775793	3	157	11	201		-405
chr14	64749342	64749781	440	-	2100	cds	ESR2	1.8948	0.00464106	0.0396931	7	128	7	152		-439
chr14	69345314	69345604	291	-	87	intron	ACTN1	3.39819	0.00633653	0.0479463	0	51	2	62		-290
chr14	69846914	69847228	315	-	2079	utr3	ERH	1.30818	0.00193763	0.0229633	35	412	44	656		-314
chr14	73586468	73586867	400	+	58517	utr3	RBM25	1.23456	0.00461384	0.0395346	38	381	33	525		-399
chr14	75368928	75369484	557	+	1743	utr3	DLST	1.33343	0.00473182	0.0401053	26	259	23	416		-556
chr14	76620749	76621367	619	+	55668	cds	C14orf118	1.25947	0.00196834	0.0231664	56	576	42	687		-618
chr14	81769168	81769523	356	-	85439	intron	STON2	3.17848	1.15054e-05	0.00057144	5	125	2	224		-355
chr14	90871485	90871816	332	+	801	utr3	CALM1	1.94331	0.000301116	0.0066741	8	241	17	274		-331
chr14	91125354	91125667	314	-	145567	intron	TTC7B	2.66935	0.00136981	0.0183157	4	84	2	124		-313
chr14	91266507	91266827	321	-	145567	intron	TTC7B	1.84669	0.00249963	0.0266001	5	147	15	246		-320
chr14	91587146	91587654	509	+	80017	intron	C14orf159	2.34593	0.0016051	0.0203965	3	111	6	135		-508
chr14	91688152	91688431	280	+	80017	intron	C14orf159	2.6226	0.00440739	0.0382454	3	79	2	86		-279
chr14	92987399	92987685	287	+	79890	intron	RIN3	2.08346	0.00505782	0.0418307	8	107	2	121		-286
chr14	93144195	93144766	572	+	79890	intron	RIN3	4.53131	2.6241e-08	3.08977e-06	0	171	3	200		-571
chr14	94545754	94546058	305	-	57062	cds	DDX24	1.52313	0.00606301	0.046639	10	169	17	253		-304
chr14	95603455	95603870	416	-	23405	intron	DICER1	3.16809	0.000118527	0.00337488	4	100	1	145		-415
chr14	95931602	95932059	458	-	161176	intron	C14orf49	3.1826	0.000503198	0.00945043	2	99	2	94		-457
chr14	97395106	97395498	393	*	NA	intergenic	NA	2.81861	1.70489e-05	0.000793398	4	161	6	221		-392
chr14	97468758	97469115	358	*	NA	intergenic	NA	3.96929	9.94021e-06	0.000504715	1	125	2	125		-357
chr14	97518371	97518647	277	*	NA	intergenic	NA	3.17253	0.000121548	0.00344433	3	118	2	123		-276
chr14	100591258	100591627	370	+	51466	intron	EVL	2.45018	0.000799572	0.0128781	2	124	7	139		-369
chr14	100800192	100800439	248	-	7453	utr3	WARS	1.73378	0.00370087	0.0341653	10	150	10	211		-247
chr14	100800508	100800753	246	-	7453	utr3	WARS	1.82496	0.000499965	0.0094125	11	206	17	336		-245
chr14	100800959	100801228	270	-	7453	utr3	WARS	2.54643	4.12825e-08	4.65997e-06	12	438	24	710		-269
chr14	100817132	100817611	480	-	7453	intron	WARS	1.73596	0.00321265	0.0311647	10	185	11	188		-479
chr14	102383222	102383552	331	+	5527	intron	PPP2R5C	3.1609	0.00280653	0.0286445	1	62	2	83		-330
chr14	102516848	102517115	268	+	1778	utr3	DYNC1H1	3.30451	2.12669e-12	6.24675e-10	15	530	8	701		-267
chr14	102547474	102547906	433	-	3320	utr3	HSP90AA1	3.57615	1.44326e-26	7.8851e-23	161	10945	218	13387		-432
chr14	103929419	103929735	317	+	4140	intron	MARK3	1.94083	0.00599633	0.0462978	6	104	6	146		-316
chr14	105176688	105177026	339	+	64423	intron	INF2	2.10375	0.0021371	0.0243653	7	117	5	163		-338
