# Supplementary material for: Cross-talk between PRMT1-mediated methylation and ubiquitylation on RBM15 controls RNA splicing
Source: eLife journal article supplement (doi:10.7554/elife.07938), 2015-11-17
Supplement: supp [file elife-07938-supp-v1.zip › elife_poa_e07938_Figure_5_source_data_2.xlsx]

## Sheet: results FDR-0.01
Gene expression changes in RBM15 knockdown cells.
Sample34: MEG-01 cells. Sample 35 and 36 are two independent RBM15 knockdown MEG-01 cells.
No	id	baseMean	Sample34	Sample35-36	foldChange	log2FoldChange	pval	padj/FDR
50214	SPNS3	190.658	545.092	13.4414	0.024659	-5.34174	3.97555e-23	3.42481e-19
9181	OSCAR	231.077	643.317	24.9569	0.038794	-4.68802	2.64865e-21	1.52115e-17
16531	P2RX7	397.265	1097.74	47.0277	0.0428405	-4.54488	6.59991e-25	1.13712e-20
50013	RP11-340F14.5	50.9341	140.321	6.24072	0.0444747	-4.49087	1.81829e-08	1.01058e-05
25541	INHBE	1465.42	4005.62	195.318	0.0487609	-4.35813	2.59212e-30	1.33982e-25
26234	SGCG	89.5938	242.863	12.9592	0.0533601	-4.2281	2.75301e-11	2.96454e-08
4828	CTSG	1097.68	2955.37	168.839	0.0571294	-4.12962	8.19864e-27	2.11886e-22
25479	HOXB9	622.665	1656.87	105.565	0.0637136	-3.97225	8.50957e-23	6.28347e-19
55426	C12orf39	1050.64	2764.32	193.805	0.0701093	-3.83425	1.25048e-23	1.61587e-19
28133	ASS1	457.627	1189.49	91.6968	0.0770893	-3.69733	7.04057e-19	2.79933e-15
56214	ACAP1	436.214	1130.12	89.26	0.0789826	-3.66232	2.3811e-18	8.79102e-15
51299	CNTN4	580.198	1493.88	123.359	0.0825762	-3.59813	3.81405e-19	1.64284e-15
47513	TRIB3	3049.27	7839.62	654.098	0.0834349	-3.58321	2.80239e-23	2.897e-19
43421	SLC22A15	1476.02	3774.63	326.711	0.0865543	-3.53025	1.76163e-21	1.13819e-17
55311	RP11-495P10.9	41.6158	104.701	10.0732	0.0962091	-3.37768	3.5262e-05	0.00681866
54129	AKNA	496.097	1243.46	122.417	0.0984486	-3.34449	2.21185e-16	6.35145e-13
51620	HSH2D	2108.11	5268.51	527.912	0.100202	-3.31902	1.95309e-15	5.04756e-12
8678	MS4A3	3734.14	9323.78	939.327	0.100745	-3.31122	1.49192e-20	7.71143e-17
2113	CDC42EP1	50.7337	126.289	12.9562	0.102592	-3.28501	1.18713e-05	0.00276519
21308	SYTL1	208.219	518.108	53.2745	0.102825	-3.28174	5.75154e-12	7.43214e-09
47924	RP4-598G3.1	299.789	745.859	76.7545	0.102907	-3.28058	1.04343e-13	2.07435e-10
33086	PTGFR	107.717	265.53	28.8104	0.108501	-3.20421	1.90913e-08	1.04965e-05
19080	TIMP3	4818.36	11837.7	1308.7	0.110553	-3.17718	2.43443e-19	1.14392e-15
34261	PAPPA2	1277.33	3121.6	355.203	0.113789	-3.13557	2.53999e-17	8.43232e-14
49086	S100P	1382.96	3372.02	388.429	0.115192	-3.11789	2.61022e-17	8.43232e-14
41428	LILRA2	69.2548	168.385	19.6897	0.116933	-3.09625	2.78025e-06	0.000802825
9454	RP11-16L9.2	84.6818	205.084	24.4806	0.119369	-3.0665	6.0409e-07	0.000219422
23184	RP5-955M13.3	87.1329	210.481	25.4587	0.120955	-3.04746	5.3785e-07	0.000201452
47650	GDF15	335.041	807.384	98.869	0.122456	-3.02967	1.686e-12	2.66361e-09
8512	MAP1B	1235.88	2962.93	372.353	0.125671	-2.99228	6.18819e-16	1.68345e-12
32777	TSC22D3	314.441	752.335	95.4932	0.126929	-2.97791	6.52243e-12	8.22272e-09
20639	ADM2	161.081	385.343	48.9507	0.127032	-2.97674	3.37711e-09	2.2379e-06
15509	ESRP1	91.6017	219.116	27.8444	0.127076	-2.97624	6.07052e-07	0.000219422
26406	VEGFA	7396.97	17622.1	2284.39	0.129632	-2.94751	3.43885e-17	1.04557e-13
16921	ALDH1L2	744.406	1772.36	230.429	0.130012	-2.94328	2.04563e-14	4.40562e-11
5361	RP11-125B21.2	80.326	191.052	24.9629	0.13066	-2.93611	2.46411e-06	0.000715533
15281	GPR97	169.72	402.613	53.273	0.132318	-2.91792	3.98257e-09	2.57314e-06
45651	LINC00261	102.032	241.784	32.1561	0.132995	-2.91055	4.09882e-07	0.000164232
11060	LAIR1	394.02	930.435	125.812	0.135219	-2.88664	4.09182e-12	5.87494e-09
48934	RP11-13A1.1	1116.88	2634.79	357.925	0.135845	-2.87996	9.45903e-15	2.22236e-11
52746	RAB3D	78.4917	184.576	25.4497	0.137882	-2.8585	5.09429e-06	0.00134436
46014	KCNG1	207.668	485.726	68.6389	0.141312	-2.82304	2.00224e-09	1.39854e-06
28192	ATP2A3	2925.75	6839.02	969.112	0.141703	-2.81905	2.06421e-15	5.08071e-12
16618	FOXD2-AS1	395.397	917.482	134.354	0.146438	-2.77164	2.46585e-11	2.77075e-08
30378	RP11-555H23.1	253.65	588.268	86.3409	0.146771	-2.76836	7.66303e-10	6.49323e-07
5675	BASP1	828.111	1920.24	282.049	0.146882	-2.76727	3.24302e-13	5.98661e-10
36623	COLGALT2	1910.72	4429.82	651.169	0.146997	-2.76614	1.60236e-14	3.60098e-11
45340	AC004791.2	293.152	678.937	100.26	0.147672	-2.75953	2.74724e-10	2.51357e-07
27721	RP4-798C17.6	129.402	298.991	44.6074	0.149193	-2.74475	2.48178e-07	0.000108511
44685	PAG1	599.867	1385.94	206.832	0.149236	-2.74433	2.6435e-12	3.90392e-09
53480	NEBL	196.551	453.344	68.1551	0.150339	-2.73371	9.20081e-09	5.46634e-06
28887	CAPG	347.273	800.908	120.456	0.150399	-2.73313	1.11649e-10	1.10979e-07
24521	C6orf223	110.462	253.657	38.864	0.153215	-2.70637	1.20304e-06	0.000403173
2329	CYFIP2	978.121	2245.13	344.616	0.153495	-2.70374	4.99604e-13	8.90466e-10
26828	TMEM154	746.295	1712.99	262.945	0.153501	-2.70368	1.70057e-12	2.66361e-09
13883	KIAA1244	571.118	1299.59	206.884	0.159192	-2.65116	1.68414e-11	1.97841e-08
19540	FUT1	220.035	499.758	80.1739	0.160425	-2.64003	1.14906e-08	6.67333e-06
27484	VLDLR	323.624	732.906	118.982	0.162343	-2.62288	8.9736e-10	7.36234e-07
44877	PTPRH	759.395	1712.99	282.596	0.164972	-2.59971	9.90222e-12	1.21863e-08
8191	PHGDH	7171.31	16130.4	2691.75	0.166874	-2.58317	1.11112e-13	2.12709e-10
9194	NUPR1	350.646	787.955	131.991	0.167511	-2.57767	9.8763e-10	7.85363e-07
17580	FAM84B	1260.86	2831.24	475.669	0.168007	-2.5734	2.33839e-12	3.55491e-09
49552	PCK2	1041.62	2336.88	393.984	0.168594	-2.56838	4.86647e-12	6.47744e-09
10574	UNC5B	562.099	1258.57	213.864	0.169926	-2.55702	1.41604e-05	0.00319617
27178	TDO2	2225.27	4982.47	846.671	0.16993	-2.55699	7.86622e-13	1.3553e-09
31596	RLTPR	92.4041	206.164	35.5243	0.172311	-2.53691	1.59234e-05	0.00351729
17516	RAB39B	102.153	227.751	39.3538	0.172793	-2.53289	8.52419e-06	0.00203981
21937	DLG3	127.604	283.88	49.4661	0.17425	-2.52077	2.07859e-06	0.000628293
53843	SLC1A4	888.038	1973.13	345.494	0.1751	-2.51375	2.3316e-11	2.67812e-08
27194	RP11-42O15.3	147.771	328.135	57.5892	0.175505	-2.51042	8.39089e-07	0.00029504
30657	STC2	2861.01	6352.22	1115.4	0.175593	-2.50969	1.31127e-12	2.18636e-09
31488	BCHE	725.49	1608.29	284.089	0.17664	-2.50111	6.54748e-11	6.90666e-08
29698	ANKFN1	584.298	1294.19	229.352	0.177216	-2.49642	1.90294e-10	1.78835e-07
44480	RAB44	316.937	698.366	126.222	0.180739	-2.46802	8.43713e-09	5.12625e-06
679	DDIT4	2170.46	4780.62	865.382	0.181019	-2.46579	4.88741e-12	6.47744e-09
45751	MEG3	242.041	532.14	96.9911	0.182266	-2.45588	5.34882e-08	2.6082e-05
47726	RPS10P7	116.985	256.895	47.0292	0.183068	-2.44955	6.85023e-06	0.00171612
13819	NLRC3	399.694	877.545	160.768	0.183202	-2.44849	2.84397e-09	1.9342e-06
20864	LAT2	665.145	1457.18	269.129	0.184692	-2.43681	2.77189e-10	2.51357e-07
38168	TSLP	157.29	343.246	64.3122	0.187364	-2.41608	1.36507e-06	0.000446569
32312	TDRD9	367.364	799.829	151.132	0.188956	-2.40388	8.5292e-09	5.12625e-06
56224	NFIB	682.8	1484.16	282.118	0.190086	-2.39528	4.84863e-10	4.24773e-07
49647	PHLDB2	423.652	917.482	176.737	0.192633	-2.37608	5.76342e-09	3.58915e-06
50023	NUCB2	3789.91	8201.21	1584.26	0.193174	-2.37203	1.37623e-11	1.65429e-08
22075	BEX2	704.285	1518.7	297.076	0.195611	-2.35394	8.27287e-10	6.8969e-07
50737	RP1-80N2.3	116.429	250.419	49.4345	0.197407	-2.34075	1.70024e-05	0.00372382
40342	MS4A4E	759.527	1629.88	324.35	0.199003	-2.32914	9.33554e-10	7.53962e-07
105	ITGAL	667.804	1432.35	285.53	0.199344	-2.32667	1.5703e-09	1.17631e-06
18830	HIST1H3G	1587.56	3403.32	679.68	0.199711	-2.32402	1.25331e-10	1.22228e-07
43284	NDUFA4L2	106.274	226.672	46.0753	0.203268	-2.29854	3.97308e-05	0.0074406
24077	NLRP12	388.117	824.655	169.848	0.205963	-2.27954	3.45999e-08	1.77069e-05
21232	NIPSNAP1	649.143	1377.3	285.063	0.206972	-2.27249	4.0502e-09	2.58453e-06
37602	PNMA2	123.916	262.292	54.7288	0.208656	-2.2608	2.25169e-05	0.00467412
24253	ICAM3	842.572	1783.15	372.281	0.208777	-2.25997	1.99887e-09	1.39854e-06
47406	TLR8	117.659	248.26	52.3581	0.2109	-2.24537	3.36611e-05	0.00659044
9637	SEL1L	8266.42	17439.7	3679.77	0.210999	-2.24469	9.03569e-11	9.34073e-08
46545	HMHA1	481.579	1015.71	214.515	0.211197	-2.24334	2.09499e-08	1.11635e-05
37196	FAM129A	3111.11	6561.62	1385.86	0.211207	-2.24327	1.89412e-10	1.78835e-07
14040	PLAU	205.355	432.836	91.6141	0.21166	-2.24018	4.86975e-06	0.00130419
31733	RPS6KA2	817.083	1721.63	364.81	0.211898	-2.23856	3.06205e-09	2.05547e-06
24179	AP001057.1	169.276	356.199	75.814	0.212842	-2.23215	5.09779e-06	0.00134436
25960	ST8SIA6	1970.88	4140.54	886.052	0.213994	-2.22436	1.23538e-08	7.09494e-06
24667	SESN2	795.665	1670.9	358.05	0.214286	-2.22239	4.30972e-09	2.71659e-06
15313	LINC00341	186.92	391.819	84.4705	0.215586	-2.21367	3.51832e-06	0.000993743
9317	FCHO1	604.052	1266.13	273.016	0.215631	-2.21337	1.29708e-08	7.36742e-06
29540	NT5M	286.688	599.062	130.501	0.217842	-2.19865	4.34343e-07	0.000170078
28859	CHD5	1687.83	3516.66	773.414	0.219929	-2.18489	1.25726e-09	9.69929e-07
12505	RP6-159A1.3	151.808	316.262	69.5808	0.22001	-2.18436	1.42456e-05	0.00320142
43083	TUBE1	1316.15	2737.34	605.554	0.22122	-2.17645	2.38963e-09	1.64687e-06
4984	RP1-249H1.4	369.688	768.526	170.269	0.221553	-2.17428	5.57179e-05	0.00989672
28639	MRC2	730.345	1516.54	337.245	0.222377	-2.16892	8.68694e-08	4.15751e-05
19855	WARS	17044.7	35356.5	7888.85	0.223123	-2.16409	3.22495e-10	2.87399e-07
32436	JDP2	421.654	874.307	195.328	0.223409	-2.16224	1.12269e-07	5.22787e-05
9455	RP11-16L9.3	240.032	496.52	111.788	0.225142	-2.15109	1.81616e-06	0.000572399
45853	CTH	2291.51	4724.49	1075.01	0.227541	-2.1358	1.83553e-09	1.31771e-06
40793	FMNL1	398.566	821.416	187.14	0.227826	-2.13399	2.06906e-07	9.54871e-05
34810	CHAC1	774.946	1595.34	364.749	0.228634	-2.12889	1.96616e-08	1.05861e-05
13550	CST7	339.628	698.366	160.259	0.229477	-2.12358	4.7544e-07	0.000182034
32706	HERPUD1	1715.33	3525.29	810.355	0.229869	-2.12112	3.58957e-09	2.34858e-06
27833	ASNS	3626.36	7430.53	1724.28	0.232053	-2.10747	1.82311e-09	1.31771e-06
18525	RP11-214C8.5	375.814	768.526	179.457	0.233508	-2.09845	4.16536e-07	0.000165615
14563	GAB2	5418.93	11078.9	2588.95	0.233684	-2.09737	1.64859e-09	1.21732e-06
22842	NTNG1	179.592	366.993	85.8917	0.234042	-2.09516	1.34921e-05	0.00305869
17282	JHDM1D	770.462	1569.43	370.976	0.236375	-2.08085	4.09259e-08	2.05377e-05
21156	SOBP	153.238	311.944	73.885	0.236854	-2.07793	3.42082e-05	0.0066472
34033	MYEF2	360.809	733.986	174.22	0.237362	-2.07484	6.58792e-07	0.000234839
2393	BCL2	1061.92	2157.7	514.032	0.238231	-2.06957	2.12047e-08	1.1184e-05
52013	LAMA3	292.627	593.665	142.108	0.239374	-2.06266	1.86992e-06	0.000585772
18649	SLC7A11-AS1	193.349	391.819	94.1141	0.240198	-2.0577	1.33039e-05	0.0030293
20871	CHRM3-AS2	561.155	1136.6	273.433	0.240571	-2.05546	5.2299e-06	0.0013722
49175	ATP2B4	2031.37	4098.45	997.834	0.243466	-2.0382	1.10381e-08	6.48337e-06
30591	GTPBP2	4146.94	8363.12	2038.86	0.243791	-2.03628	1.08988e-06	0.000373073
46770	ACP6	428.979	864.592	211.172	0.244244	-2.0336	5.51625e-07	0.000205125
37462	ERN1	887.629	1788.55	437.169	0.244426	-2.03253	5.72585e-08	2.76596e-05
44352	TM6SF1	2227.58	4482.71	1100.01	0.24539	-2.02685	2.01808e-06	0.000617221
6739	C17orf51	1716.48	3452.97	848.235	0.245654	-2.0253	1.72137e-08	9.67109e-06
11570	KIF21B	4765.23	9581.75	2356.98	0.245986	-2.02335	4.60907e-07	0.000177786
2107	TNNT1	274.042	550.489	135.819	0.246724	-2.01903	4.05815e-06	0.0011217
46914	VAT1	4166.04	8363.12	2067.5	0.247216	-2.01616	7.90093e-09	4.8617e-06
34069	CORO1A	1953.77	3902	979.656	0.251065	-1.99387	3.27069e-07	0.000136335
29948	LARP6	225.445	446.868	114.734	0.256751	-1.96156	1.68913e-05	0.00371522
13596	CEBPG	4787.17	9480.29	2440.6	0.25744	-1.95769	1.92921e-08	1.04965e-05
50004	DENND3	2962.13	5855.7	1515.35	0.258782	-1.95019	3.07791e-08	1.59091e-05
33405	DNASE2	561.452	1108.53	287.911	0.259722	-1.94496	6.93098e-07	0.000245376
678	DDIT3	727.631	1432.35	375.271	0.261996	-1.93238	3.95883e-07	0.000161121
14215	TCEA1	4682.84	9215.84	2416.34	0.262194	-1.93129	3.00973e-08	1.57138e-05
5780	PLD1	385.059	757.732	198.722	0.262259	-1.93094	2.85492e-06	0.000819805
24353	PSAT1	3187.85	6272.34	1645.6	0.262359	-1.93039	3.94302e-08	1.99811e-05
34668	DOCK2	4571.12	8991.33	2361.01	0.262588	-1.92913	4.53927e-08	2.23453e-05
2573	ZNF419	961.136	1890.01	496.697	0.262801	-1.92796	2.1866e-07	9.91413e-05
45232	TAZ	208.708	410.169	107.978	0.263252	-1.92548	3.30832e-05	0.00650191
32508	ATF5	928.061	1823.09	480.546	0.263589	-1.92364	2.49135e-07	0.000108511
24319	TCEA1P2	3280.07	6439.65	1700.29	0.264035	-1.9212	4.49751e-08	2.23453e-05
51417	IQGAP3	773.767	1518.7	401.299	0.264238	-1.92009	3.99499e-07	0.000161323
934	FAM64A	303.182	593.665	157.941	0.266044	-1.91026	8.66883e-06	0.00206486
39322	FLYWCH1	777.436	1515.46	408.422	0.269502	-1.89163	5.85578e-07	0.000214662
1362	HIST3H2BB	279.287	544.013	146.924	0.270075	-1.88857	1.4832e-05	0.00331876
31736	RPS6KA5	493.261	959.579	260.102	0.271058	-1.88333	2.24104e-06	0.000666077
28670	MYO1G	4877.29	9486.77	2572.56	0.271173	-1.88271	4.24559e-07	0.000167516
1484	EPB41L5	679.042	1320.1	358.515	0.271583	-1.88054	9.47829e-07	0.000326609
41772	CD4	623.107	1211.08	329.122	0.27176	-1.8796	1.20902e-06	0.000403173
40859	2015-09-06	2423.29	4695.35	1287.26	0.274155	-1.86693	2.9694e-07	0.000125805
44142	ATP13A4	477.621	923.959	254.453	0.275394	-1.86043	3.24322e-06	0.000924283
7317	WDFY4	367.214	709.16	196.242	0.276724	-1.85348	8.21411e-06	0.00199329
10604	HIST1H4I	1609.45	3105.41	861.469	0.277409	-1.84991	2.82084e-07	0.000121179
29187	CDK19	1480.04	2854.99	792.56	0.277605	-1.84889	5.87825e-06	0.00149672
45053	LTBP4	336.912	649.793	180.472	0.277737	-1.84821	1.15989e-05	0.00273756
32631	GFPT1	6111.59	11780.5	3277.14	0.278184	-1.84589	1.04751e-07	4.92216e-05
39900	IDH2	2174.65	4185.88	1169.04	0.279282	-1.84021	2.29182e-07	0.000103008
28333	GPT2	2337.63	4497.82	1257.53	0.279586	-1.83863	2.17725e-07	9.91413e-05
19370	CEP70	2338.07	4492.42	1260.89	0.28067	-1.83305	2.49821e-07	0.000108511
46635	TVP23C	233.165	447.947	125.774	0.28078	-1.83249	5.08782e-05	0.00916305
41614	BBC3	480.046	921.8	259.169	0.281155	-1.83056	4.5973e-06	0.00123763
37844	SLC27A2	2016.5	3867.46	1091.02	0.282102	-1.82571	1.2671e-06	0.000419831
27299	PRDM8	323.642	620.65	175.138	0.282185	-1.82529	1.70838e-05	0.00372586
38145	CCPG1	1666.89	3189.6	905.535	0.283902	-1.81653	4.40466e-07	0.000171179
2303	SPTBN2	749.482	1433.43	407.508	0.284289	-1.81457	1.77803e-06	0.0005673
56234	SLC7A11	2452.1	4678.08	1339.1	0.286251	-1.80465	3.47104e-07	0.000143529
39797	H1F0	3811.65	7257.82	2088.56	0.287766	-1.79703	2.83677e-07	0.000121179
38181	CRNDE	729.184	1388.1	399.727	0.287968	-1.79602	2.41571e-06	0.000705442
34865	STK39	456.245	867.83	250.452	0.288596	-1.79288	8.33322e-06	0.00200338
14558	CSF2RA	421.121	798.749	232.307	0.290838	-1.78171	1.18765e-05	0.00276519
36221	AFAP1	595.168	1125.8	329.849	0.29299	-1.77108	5.2645e-06	0.0013743
50864	FOXK1	1401.99	2649.9	778.029	0.293606	-1.76805	1.09861e-06	0.000373584
6349	TRAK2	3049.46	5739.12	1704.62	0.297018	-1.75138	6.45368e-07	0.000231651
6808	ANTXR2	4085.1	7655.04	2300.13	0.300472	-1.7347	2.09638e-06	0.000629987
14408	TXNIP	12398.4	23220.9	6987.2	0.300901	-1.73264	4.98102e-07	0.000189308
8669	THAP9-AS1	890.833	1666.58	502.959	0.301791	-1.72838	3.84913e-06	0.00106964
30049	LONRF2	1414.74	2645.59	799.322	0.302134	-1.72674	1.91421e-06	0.000596035
18835	HIST1H3I	2287.76	4276.55	1293.37	0.302434	-1.72531	1.17666e-06	0.00039751
18037	DTD1	686.926	1283.4	388.691	0.302862	-1.72327	6.87273e-06	0.00171612
4460	NCOA7	2248.53	4199.91	1272.84	0.303064	-1.72231	1.89412e-05	0.00409638
54801	SEC63	2175.9	4062.83	1232.43	0.303343	-1.72098	1.30789e-06	0.000430587
16825	ACAA2	449.443	838.687	254.821	0.303833	-1.71865	2.00856e-05	0.00430782
39401	HIST1H2AL	985.116	1838.2	558.573	0.303869	-1.71848	3.67819e-06	0.00103325
52651	LINC00662	1075.82	2006.59	610.438	0.304217	-1.71683	3.25452e-06	0.000924283
37820	GABBR1	479.306	893.736	272.092	0.304443	-1.71576	1.7534e-05	0.00380797
34569	TSEN15	2134.37	3977.56	1212.78	0.304907	-1.71356	1.4774e-06	0.000474309
10367	RBCK1	1597.22	2974.8	908.43	0.305375	-1.71135	2.05424e-06	0.000624586
51397	FAM107B	878.462	1635.28	500.054	0.305791	-1.70938	5.04072e-06	0.00134301
30155	SEC24D	2392.68	4451.41	1363.31	0.306265	-1.70715	1.45973e-06	0.000471567
24978	CD34	411.422	763.129	235.568	0.308687	-1.69578	3.65711e-05	0.00694958
18834	HIST1H3H	8449.69	15672.8	4838.16	0.308699	-1.69573	9.4392e-07	0.000326609
35501	EPHX2	449.95	834.369	257.74	0.308904	-1.69477	2.60076e-05	0.00527169
37811	MTL5	455.051	843.004	261.075	0.309696	-1.69108	2.63457e-05	0.00531935
49860	PPM1M	401.752	743.7	230.777	0.31031	-1.68822	3.78779e-05	0.00714537
35926	DEPTOR	373.93	691.89	214.95	0.310671	-1.68654	4.69012e-05	0.00859656
36318	EDEM1	2441.31	4503.22	1410.36	0.313189	-1.67489	2.26138e-06	0.000666393
37626	NCF4	2616.92	4823.8	1513.48	0.313753	-1.6723	2.24225e-06	0.000666077
50829	CNTRL	1488.27	2736.26	864.27	0.315859	-1.66265	4.30795e-06	0.00118441
4376	SLC38A2	15135.7	27801.9	8802.67	0.316622	-1.65917	1.44181e-06	0.000468706
33430	GFI1	1601.39	2934.86	934.653	0.318466	-1.65079	5.78397e-06	0.00148737
19779	IRF2BP2	1695.76	3107.57	989.861	0.318533	-1.65049	4.40993e-06	0.00120026
41448	NFE2L1	5930.34	10867.3	3461.86	0.318557	-1.65038	2.01524e-06	0.000617221
20670	PGPEP1	715.159	1310.38	417.548	0.318647	-1.64997	1.53413e-05	0.00341793
32514	ATF3	757.522	1383.78	444.394	0.321145	-1.6387	1.57809e-05	0.00350078
15433	MARCKS	880.373	1607.21	516.954	0.321646	-1.63645	1.24593e-05	0.00287498
48488	HEBP2	1255.1	2288.31	738.494	0.322725	-1.63162	7.95165e-06	0.00195717
52308	BHLHE40	3198.48	5820.08	1887.68	0.32434	-1.62442	3.83461e-06	0.00106964
30990	TNFAIP3	2091.79	3796.22	1239.58	0.32653	-1.61471	5.85183e-06	0.00149672
13593	CEBPB	709.406	1286.63	420.792	0.327048	-1.61242	2.43572e-05	0.00503591
46638	ILF3-AS1	792.961	1435.59	471.646	0.328538	-1.60587	2.16085e-05	0.00454478
4495	SYBU	601.159	1083.71	359.884	0.332085	-1.59037	4.29023e-05	0.00794814
39253	SMAP2	7438.74	13409.3	4453.48	0.332119	-1.59023	4.41203e-06	0.00120026
48259	COG5	1395.88	2512.82	837.404	0.333252	-1.58531	1.26468e-05	0.00290528
11056	HSPG2	720.743	1297.43	432.4	0.333275	-1.58521	3.23383e-05	0.00637979
12325	HSPA13	5280.04	9498.64	3170.74	0.33381	-1.5829	5.41107e-06	0.00140546
27742	FNDC3B	3742.92	6732.16	2248.3	0.333963	-1.58224	6.2784e-06	0.00158302
40538	C9orf91	602.52	1083.71	361.926	0.33397	-1.58221	4.653e-05	0.00855887
35463	PLCH1	3370.89	6052.14	2030.27	0.335462	-1.57578	7.22397e-06	0.00179516
18826	HIST1H3B	7311.78	13124.3	4405.51	0.335676	-1.57486	5.4823e-06	0.00141685
11894	NUP210	3334.61	5981.98	2010.92	0.336163	-1.57277	7.54141e-06	0.00186507
48449	CREB3L2	1154.06	2063.8	699.189	0.338788	-1.56155	2.12479e-05	0.0045196
47375	GSE1	2667.21	4768.75	1616.44	0.338965	-1.56079	1.00384e-05	0.00238011
33151	EIF1	4162.78	7439.16	2524.59	0.339365	-1.55909	8.13765e-06	0.00198405
49173	ATP2B3	714.961	1276.92	433.983	0.339867	-1.55696	4.50581e-05	0.00831773
6272	UBALD2	1047.42	1870.58	635.837	0.339913	-1.55676	2.54999e-05	0.00520963
22783	PXK	1265.83	2258.09	769.702	0.340865	-1.55273	2.12225e-05	0.0045196
50081	ITPR1	4030.46	7179.03	2456.17	0.342132	-1.54738	1.1865e-05	0.00276519
22615	PYGB	2641.48	4703.99	1610.22	0.34231	-1.54662	3.62707e-05	0.00691793
38986	ATXN2L	1052.47	1872.74	642.336	0.342992	-1.54375	2.94248e-05	0.00589499
35907	RNF44	911.98	1622.32	556.808	0.343216	-1.54281	3.62612e-05	0.00691793
7653	EPGN	717.027	1274.76	438.16	0.34372	-1.5407	5.4136e-05	0.00968228
27358	ABCA3	1228.54	2183.61	751.013	0.343932	-1.5398	2.57116e-05	0.00523221
31516	USP11	1427.89	2537.65	873.017	0.344026	-1.53941	2.18954e-05	0.00457249
2681	RP11-844P9.2	3347.27	5945.29	2048.26	0.344519	-1.53734	1.201e-05	0.00278373
52012	LAMA2	1052.17	1859.79	648.359	0.348619	-1.52028	3.91202e-05	0.00735289
28783	ZFAND1	1330.36	2347.68	821.7	0.350006	-1.51455	3.19172e-05	0.00632084
8585	COMT	2160	3808.09	1335.95	0.350818	-1.5112	2.19389e-05	0.00457249
14857	PKD1	1332.89	2348.75	824.962	0.351234	-1.5095	3.39267e-05	0.00661736
37097	SNORD116-21	1603	2817.21	995.896	0.353504	-1.5002	3.17612e-05	0.00632084
17881	MCTP1	1307.89	2295.86	813.895	0.354505	-1.49612	4.0653e-05	0.00756953
11686	SLC7A1	3196.09	5607.44	1990.41	0.35496	-1.49427	2.15276e-05	0.00454478
32837	EEF1E1	1311.65	2293.71	820.623	0.357772	-1.48289	4.74404e-05	0.00866466
29053	BCAT1	7842.71	13692.1	4918.02	0.359188	-1.47719	2.00548e-05	0.00430782
7057	AARS	9061.34	15781.8	5701.13	0.361247	-1.46894	2.16301e-05	0.00454478
19804	SHMT2	6555.16	11395.1	4135.18	0.36289	-1.4624	2.51903e-05	0.00516682
33317	HIST1H2BL	2271.34	3944.09	1434.96	0.363826	-1.45868	4.07121e-05	0.00756953
3067	POC1B	1589.8	2757.84	1005.78	0.364697	-1.45523	5.52096e-05	0.00984025
14428	CLIC4	4739.65	8213.09	3002.93	0.365628	-1.45155	3.18287e-05	0.00632084
51627	CBS	8514.51	14752	5395.74	0.365763	-1.45102	2.76322e-05	0.0055574
19563	PLXND1	2376.51	4102.76	1513.38	0.368868	-1.43882	5.01061e-05	0.00905554
10684	GARS	7388.69	12730.3	4717.87	0.3706	-1.43206	3.61991e-05	0.00691793
3319	RAD21	12056.9	20724.3	7723.15	0.372661	-1.42406	3.69266e-05	0.00699143
39407	HIST1H2AE	3794.69	6519.52	2432.28	0.373076	-1.42246	4.93467e-05	0.00894958
15127	GPR128	961.344	327.055	1278.49	3.90909	1.96683	5.95481e-06	0.00150879
56065	HBG1	18624.1	6183.83	24844.2	4.01761	2.00634	5.18065e-07	0.000195458
56064	HBG2	69400.2	22236.5	92982.1	4.1815	2.06402	2.38865e-07	0.000106435
10721	TUBB2A	645.23	204.005	865.842	4.24422	2.0855	4.59083e-06	0.00123763
15937	ALAS2	595.991	177.02	805.477	4.5502	2.18593	2.2691e-06	0.000666393
35945	HBA1	560.824	161.909	760.282	4.69574	2.23135	1.79204e-06	0.000568265
36328	CCL2	542.203	143.559	741.525	5.1653	2.36885	5.65157e-07	0.000208656
22625	BAMBI	173.438	44.255	238.029	5.37858	2.42723	4.81365e-05	0.00876084
35576	SLC16A9	739.746	186.735	1016.25	5.44223	2.4442	9.84323e-08	4.66768e-05
50255	IL7R	143.927	33.4611	199.161	5.952	2.57337	5.3476e-05	0.00959745
3020	SLA	155.206	34.5405	215.539	6.24019	2.64159	2.46511e-05	0.00507636
49934	2015-09-10	209.114	46.4138	290.464	6.25814	2.64573	1.28742e-05	0.00294443
47404	TLR4	173.477	36.6993	241.866	6.59049	2.72038	8.32772e-06	0.00200338
30141	GNG11	127.37	25.9054	178.102	6.87511	2.78138	3.53544e-05	0.00681866
34834	TUBB1	261.44	51.8108	366.254	7.06907	2.82152	3.7983e-07	0.000155815
46998	S1PR1	895.82	172.703	1257.38	7.2806	2.86406	5.91479e-10	5.09539e-07
14382	HBE1	55817.4	10517.6	78467.3	7.46059	2.89929	4.76443e-12	6.47744e-09
45409	TNFRSF1B	180.148	33.4611	253.491	7.5757	2.92138	1.93826e-06	0.00059991
13580	AMIGO2	595.845	106.86	840.338	7.86394	2.97525	1.0204e-09	7.99124e-07
26465	EGLN3	960.612	170.544	1355.65	7.94896	2.99077	1.10028e-10	1.10979e-07
51760	MRAP2	178.065	30.2229	251.986	8.33757	3.05963	8.86409e-07	0.000309572
24979	CD36	566.031	73.3986	812.347	11.0676	3.46827	3.1417e-07	0.000132023
18063	HEMGN	1193.9	140.321	1720.69	12.2626	3.61619	2.57899e-14	5.33212e-11
38251	SLC7A8	244.246	28.0642	352.336	12.5547	3.65015	1.36161e-09	1.03499e-06
35952	HBA2	361.456	39.9375	522.215	13.0758	3.70883	2.66453e-11	2.9303e-08
20763	CD86	65.7744	4.31756	96.5028	22.3512	4.48228	8.04302e-06	0.00197027

## Sheet: gene ontology
Category	Term	Count	%	PValue	Genes	List Total	Pop Hits	Pop Total	Fold Enrichment	Bonferroni	Benjamini	FDR
GOTERM_BP_FAT	GO:0001101~response to acid	6	0.260417	2.38e-05	CCL2, BCHE, BCL2, AARS, ASNS, TIMP3	203	24	13528	16.6601	0.0424704	0.0424704	0.0405185
GOTERM_BP_FAT	GO:0051789~response to protein stimulus	10	0.434028	3.13e-05	HERPUD1, P2RX7, BCL2, MAP1B, AARS, ERN1, CREB3L2, CD4, EDEM1, DDIT3	203	107	13528	6.22807	0.055443	0.0281168	0.0532505
GOTERM_BP_FAT	GO:0008652~cellular amino acid biosynthetic process	7	0.303819	0.000106	BCAT1, CTH, ASS1, PHGDH, ASNS, PSAT1, CBS	203	51	13528	9.14672	0.175412	0.0622676	0.179946
GOTERM_BP_FAT	GO:0048872~homeostasis of number of cells	9	0.390625	0.000124	DNASE2, CORO1A, P2RX7, ALAS2, BCL2, CEBPG, VEGFA, TCEA1P2, TCEA1, IL7R	203	100	13528	5.99764	0.20164	0.0547433	0.210072
GOTERM_BP_FAT	GO:0006563~L-serine metabolic process	4	0.173611	0.000174	SHMT2, PHGDH, PSAT1, CBS	203	8	13528	33.3202	0.271344	0.0613481	0.295168
GOTERM_BP_FAT	GO:0009612~response to mechanical stimulus	7	0.303819	0.000179	TXNIP, P2RX7, CCL2, MAP1B, PKD1, GFI1, TIMP3	203	56	13528	8.33005	0.278821	0.0530207	0.304772
GOTERM_BP_FAT	GO:0009070~serine family amino acid biosynthetic process	4	0.173611	0.000495	CTH, PHGDH, PSAT1, CBS	203	11	13528	24.2329	0.594418	0.120955	0.839173
GOTERM_BP_FAT	GO:0009069~serine family amino acid metabolic process	5	0.217014	0.000558	CTH, SHMT2, PHGDH, PSAT1, CBS	203	26	13528	12.8155	0.637812	0.119221	0.943901
GOTERM_BP_FAT	GO:0042110~T cell activation	9	0.390625	0.0006	ITGAL, P2RX7, CD86, DOCK2, NLRC3, BCL2, CD4, IL7R, HSH2D	203	126	13528	4.76003	0.664888	0.114388	1.01575
GOTERM_BP_FAT	GO:0046649~lymphocyte activation	11	0.477431	0.000817	ITGAL, P2RX7, LAT2, CD86, DOCK2, NLRC3, BCL2, CEBPG, CD4, IL7R, HSH2D	203	199	13528	3.68364	0.774318	0.138313	1.3805
GOTERM_BP_FAT	GO:0042035~regulation of cytokine biosynthetic process	7	0.303819	0.00082	CD86, CEBPB, CEBPG, NLRP12, CD4, TLR4, TLR8	203	74	13528	6.30382	0.775515	0.126995	1.3854
GOTERM_BP_FAT	GO:0015671~oxygen transport	4	0.173611	0.00084	HBG1, HBA2, HBG2, HBA1, HBE1	203	13	13528	20.5047	0.78354	0.119732	1.41892
GOTERM_BP_FAT	GO:0001666~response to hypoxia	9	0.390625	0.0009	ALAS2, CCL2, BCL2, VEGFA, EGLN3, ITPR1, PLAU, VLDLR, DDIT4	203	134	13528	4.47585	0.805934	0.118491	1.5194
GOTERM_BP_FAT	GO:0045321~leukocyte activation	12	0.520833	0.00103545	ITGAL, P2RX7, LAT2, CD86, DOCK2, NLRC3, BCL2, CEBPG, CD4, TLR4, IL7R, HSH2D	203	242	13528	3.30448	0.848404	0.126068	1.74627
GOTERM_BP_FAT	GO:0070482~response to oxygen levels	9	0.390625	0.00125143	ALAS2, CCL2, BCL2, VEGFA, EGLN3, ITPR1, PLAU, VLDLR, DDIT4	203	141	13528	4.25364	0.897745	0.141028	2.10687
GOTERM_BP_FAT	GO:0051593~response to folic acid	3	0.130208	0.00130516	BCHE, BCL2, TIMP3	203	4	13528	49.9803	0.907287	0.138121	2.19639
GOTERM_BP_FAT	GO:0009309~amine biosynthetic process	7	0.303819	0.00131812	BCAT1, CTH, ASS1, PHGDH, ASNS, PSAT1, CBS	203	81	13528	5.75905	0.909452	0.13176	2.21797
GOTERM_BP_FAT	GO:0034976~response to endoplasmic reticulum stress	5	0.217014	0.00157572	HERPUD1, AARS, ERN1, FAM129A, DDIT3	203	34	13528	9.80006	0.943394	0.147461	2.64598
GOTERM_BP_FAT	GO:0006334~nucleosome assembly	7	0.303819	0.00159118	H1F0, HIST1H2BL, HIST1H2AE, HIST1H3B, HIST3H2BB, HIST1H4I, HIST1H2AL, HIST1H3G, HIST1H3H, HIST1H3I	203	84	13528	5.55337	0.944968	0.141547	2.67161
GOTERM_BP_FAT	GO:0031497~chromatin assembly	7	0.303819	0.00190528	H1F0, HIST1H2BL, HIST1H2AE, HIST1H3B, HIST3H2BB, HIST1H4I, HIST1H2AL, HIST1H3G, HIST1H3H, HIST1H3I	203	87	13528	5.36187	0.968971	0.159401	3.19098
GOTERM_BP_FAT	GO:0043200~response to amino acid stimulus	4	0.173611	0.00191126	CCL2, AARS, ASNS, TIMP3	203	17	13528	15.6801	0.969307	0.152862	3.20085
GOTERM_BP_FAT	GO:0009636~response to toxin	6	0.260417	0.00213385	NUPR1, BCL2, MAP1B, EPHX2, SLC7A8, SLC7A11	203	61	13528	6.55479	0.979553	0.162064	3.5673
GOTERM_BP_FAT	GO:0015669~gas transport	4	0.173611	0.00226845	HBG1, HBA2, HBG2, HBA1, HBE1	203	18	13528	14.809	0.984006	0.164568	3.78825
GOTERM_BP_FAT	GO:0065004~protein-DNA complex assembly	7	0.303819	0.00239451	H1F0, HIST1H2BL, HIST1H2AE, HIST1H3B, HIST3H2BB, HIST1H4I, HIST1H2AL, HIST1H3G, HIST1H3H, HIST1H3I	203	91	13528	5.12618	0.987293	0.166316	3.99475
GOTERM_BP_FAT	GO:0014075~response to amine stimulus	5	0.217014	0.00263704	CCL2, AARS, ASNS, TIMP3, DDIT3	203	39	13528	8.54364	0.991839	0.17497	4.39088
GOTERM_BP_FAT	GO:0034728~nucleosome organization	7	0.303819	0.00267193	H1F0, HIST1H2BL, HIST1H2AE, HIST1H3B, HIST3H2BB, HIST1H4I, HIST1H2AL, HIST1H3G, HIST1H3H, HIST1H3I	203	93	13528	5.01594	0.992343	0.170878	4.44773
GOTERM_BP_FAT	GO:0006333~chromatin assembly or disassembly	8	0.347222	0.00294736	H1F0, HIST1H2BL, HIST1H2AE, HIST1H3B, HIST3H2BB, HIST1H4I, HIST1H2AL, CHD5, HIST1H3G, HIST1H3H, HIST1H3I	203	127	13528	4.19782	0.995369	0.180513	4.89549
GOTERM_BP_FAT	GO:0046651~lymphocyte proliferation	5	0.217014	0.00346598	P2RX7, CD86, DOCK2, BCL2, IL7R	203	42	13528	7.93338	0.998205	0.202126	5.73321
GOTERM_BP_FAT	GO:0044271~nitrogen compound biosynthetic process	13	0.564236	0.00354478	BCAT1, ASS1, ASNS, ATP13A4, CTH, ATP2B3, ALAS2, ATP2B4, ATP2A3, PHGDH, NFE2L1, PSAT1, CBS	203	325	13528	2.66562	0.998445	0.199872	5.85989
GOTERM_BP_FAT	GO:0034620~cellular response to unfolded protein	4	0.173611	0.00357764	HERPUD1, AARS, ERN1, DDIT3	203	21	13528	12.6934	0.998536	0.195514	5.91265
GOTERM_BP_FAT	GO:0030968~endoplasmic reticulum unfolded protein response	4	0.173611	0.00357764	HERPUD1, AARS, ERN1, DDIT3	203	21	13528	12.6934	0.998536	0.195514	5.91265
GOTERM_BP_FAT	GO:0030218~erythrocyte differentiation	5	0.217014	0.00377749	DNASE2, ALAS2, CEBPG, VEGFA, TCEA1P2, TCEA1	203	43	13528	7.74888	0.998984	0.199339	6.23304
GOTERM_BP_FAT	GO:0001775~cell activation	12	0.520833	0.00390775	ITGAL, P2RX7, LAT2, CD86, DOCK2, NLRC3, BCL2, CEBPG, CD4, TLR4, IL7R, HSH2D	203	287	13528	2.78636	0.999199	0.199734	6.4413
GOTERM_BP_FAT	GO:0032943~mononuclear cell proliferation	5	0.217014	0.00410744	P2RX7, CD86, DOCK2, BCL2, IL7R	203	44	13528	7.57277	0.999444	0.203177	6.75975
GOTERM_BP_FAT	GO:0070661~leukocyte proliferation	5	0.217014	0.00410744	P2RX7, CD86, DOCK2, BCL2, IL7R	203	44	13528	7.57277	0.999444	0.203177	6.75975
GOTERM_BP_FAT	GO:0006986~response to unfolded protein	6	0.260417	0.00414285	HERPUD1, AARS, ERN1, CREB3L2, EDEM1, DDIT3	203	71	13528	5.63158	0.999479	0.199363	6.81611
GOTERM_BP_FAT	GO:0050804~regulation of synaptic transmission	8	0.347222	0.00430449	LAMA2, S100P, CCL2, BCHE, MAP1B, CNTN4, PXK, BHLHE40	203	136	13528	3.92002	0.999612	0.201037	7.07297
GOTERM_BP_FAT	GO:0007584~response to nutrient	8	0.347222	0.00504042	CCL2, STC2, BCHE, BCL2, MAP1B, TIMP3, DDIT3, VLDLR	203	140	13528	3.80802	0.999899	0.225553	8.23405
GOTERM_BP_FAT	GO:0042108~positive regulation of cytokine biosynthetic process	5	0.217014	0.00562152	CD86, CEBPG, CD4, TLR4, TLR8	203	48	13528	6.94171	0.999965	0.242287	9.14119
GOTERM_BP_FAT	GO:0010033~response to organic substance	21	0.911458	0.00563846	TXNIP, PLD1, HERPUD1, CCL2, MAP1B, AARS, GNG11, ASNS, TLR4, COMT, EDEM1, TIMP3, DDIT3, CORO1A, P2RX7, BCHE, BCL2, CREB3L2, ERN1, CD4, VLDLR	203	721	13528	1.94098	0.999966	0.237357	9.1675
GOTERM_BP_FAT	GO:0009991~response to extracellular stimulus	10	0.434028	0.00583497	P2RX7, CCL2, STC2, BCHE, BCL2, MAP1B, ASNS, TIMP3, DDIT3, VLDLR	203	220	13528	3.02911	0.999976	0.239094	9.47226
GOTERM_BP_FAT	GO:0034101~erythrocyte homeostasis	5	0.217014	0.00605098	DNASE2, ALAS2, CEBPG, VEGFA, TCEA1P2, TCEA1	203	49	13528	6.80004	0.999984	0.241421	9.80617
GOTERM_BP_FAT	GO:0051969~regulation of transmission of nerve impulse	8	0.347222	0.00655107	LAMA2, S100P, CCL2, BCHE, MAP1B, CNTN4, PXK, BHLHE40	203	147	13528	3.62669	0.999994	0.253172	10.5747
GOTERM_BP_FAT	GO:0006955~immune response	20	0.868056	0.00746669	ITGAL, LAIR1, CCL2, CEBPB, NCF4, CEBPG, TLR4, IL7R, TLR8, CORO1A, TNFRSF1B, CD86, LAT2, LILRA2, CST7, BCL2, VEGFA, CD4, PAG1, CTSG	203	690	13528	1.93161	0.999999	0.277436	11.966
GOTERM_BP_FAT	GO:0031644~regulation of neurological system process	8	0.347222	0.00809447	LAMA2, S100P, CCL2, BCHE, MAP1B, CNTN4, PXK, BHLHE40	203	153	13528	3.48447	1	0.291203	12.9081
GOTERM_BP_FAT	GO:0006323~DNA packaging	7	0.303819	0.00817817	H1F0, HIST1H2BL, HIST1H2AE, HIST1H3B, HIST3H2BB, HIST1H4I, HIST1H2AL, HIST1H3G, HIST1H3H, HIST1H3I	203	117	13528	3.98703	1	0.288128	13.033
GOTERM_BP_FAT	GO:0046394~carboxylic acid biosynthetic process	8	0.347222	0.00866369	BCAT1, CTH, PLD1, ASS1, PHGDH, ASNS, PSAT1, CBS	203	155	13528	3.4395	1	0.296803	13.7541
GOTERM_BP_FAT	GO:0016053~organic acid biosynthetic process	8	0.347222	0.00866369	BCAT1, CTH, PLD1, ASS1, PHGDH, ASNS, PSAT1, CBS	203	155	13528	3.4395	1	0.296803	13.7541
GOTERM_BP_FAT	GO:0051494~negative regulation of cytoskeleton organization	5	0.217014	0.00908974	CORO1A, S1PR1, CAPG, MAP1B, SPTBN2	203	55	13528	6.05822	1	0.303356	14.3822
GOTERM_BP_FAT	GO:0030097~hemopoiesis	10	0.434028	0.00909152	DNASE2, DOCK2, ALAS2, BCL2, CEBPG, TAZ, VEGFA, TCEA1P2, CD4, TCEA1, IL7R	203	236	13528	2.82375	1	0.298026	14.3848
GOTERM_BP_FAT	GO:0031667~response to nutrient levels	9	0.390625	0.00953378	CCL2, STC2, BCHE, BCL2, MAP1B, ASNS, TIMP3, DDIT3, VLDLR	203	197	13528	3.04449	1	0.304708	15.0323
GOTERM_BP_FAT	GO:0007242~intracellular signaling cascade	30	1.30208	0.0119213	CCL2, RAB3D, IQGAP3, GNG11, TLR4, TLR8, HMHA1, RAB44, CDC42EP1, NLRC3, S1PR1, PLCH1, PKD1, HIST1H4I, PAG1, GTPBP2, PLD1, RAB39B, MCTP1, RPS6KA5, P2RX7, LAT2, CD36, NUPR1, BBC3, EPGN, RPS6KA2, ACAP1, NLRP12, PHLDB2	203	1256	13528	1.59173	1	0.359622	18.4488
GOTERM_BP_FAT	GO:0055065~metal ion homeostasis	9	0.390625	0.0119506	HERPUD1, P2RX7, CCL2, S1PR1, BCL2, EPHX2, SLC7A8, MTL5, ITPR1	203	205	13528	2.92568	1	0.354586	18.4899
GOTERM_BP_FAT	GO:0009611~response to wounding	16	0.694444	0.0133246	ITGAL, CCL2, CEBPB, MAP1B, EPHX2, TLR4, PXK, TIMP3, TLR8, P2RX7, TNFRSF1B, CD36, NUPR1, BCL2, NFE2L1, PLAU	203	530	13528	2.01179	1	0.380576	20.3961
GOTERM_BP_FAT	GO:0030334~regulation of cell migration	8	0.347222	0.0135075	LAMA2, CORO1A, PLD1, LAMA3, S1PR1, CLIC4, BCL2, VEGFA	203	169	13528	3.15457	1	0.378888	20.6466
GOTERM_BP_FAT	GO:0010243~response to organic nitrogen	5	0.217014	0.0144828	CCL2, AARS, ASNS, TIMP3, DDIT3	203	63	13528	5.28892	1	0.394224	21.9702
GOTERM_BP_FAT	GO:0006984~ER-nuclear signaling pathway	4	0.173611	0.0151135	HERPUD1, AARS, ERN1, DDIT3	203	35	13528	7.61605	1	0.401634	22.8151
