# Supplementary material for: Cross-talk between PRMT1-mediated methylation and ubiquitylation on RBM15 controls RNA splicing
Source: eLife journal article supplement (doi:10.7554/elife.07938), 2015-11-17
Supplement: supp [file elife-07938-supp-v1.zip › elife_poa_e07938_Figure_5_source_data_3.xls]

## Sheet: miso-RIP-DEXseq
genes overlap in MISO, RIP and DEX-seq analysis
events	Ensembl ID	Gene name	character
1:17066768-17299474	ENSG00000058453	CROCC	protein_coding
1:22379120-22419437	ENSG00000070831	CDC42	protein_coding
1:47681962-47697892	ENSG00000162367	TAL1	protein_coding
1:51819935-51985000	ENSG00000085832	EPS15	protein_coding
1:116519119-116612675	ENSG00000163393	SLC22A15	protein_coding
1:154192655-154243986	ENSG00000143569	UBAP2L	protein_coding
1:155719508-155829191	ENSG00000116580	GON4L	protein_coding
1:169890467-170054349	ENSG00000075945	KIFAP3	protein_coding
1:185703683-186160085	ENSG00000143341	HMCN1	protein_coding
1:203764782-203823252	ENSG00000058673	ZC3H11A	protein_coding
1:228395831-228566577	ENSG00000154358	OBSCN	protein_coding
2:217730-266398	ENSG00000035115	SH3YL1	protein_coding
2:264140-278283	ENSG00000143727	ACP1	protein_coding
2:150426148-150444330	ENSG00000168288	MMADHC	protein_coding
2:239969864-240323348	ENSG00000068024	HDAC4	protein_coding
3:42642106-42690227	ENSG00000114857	NKTR	protein_coding
3:49067140-49131796	ENSG00000198218	QRICH1	protein_coding
3:50126341-50156454	ENSG00000003756	RBM5	protein_coding
3:58413357-58419584	ENSG00000168291	PDHB	protein_coding
3:129158968-129239198	ENSG00000163913	IFT122	protein_coding
3:142683339-142779567	ENSG00000163714	U2SURP	protein_coding
3:156864297-156878549	ENSG00000163660	CCNL1	protein_coding
3:186500994-186507689	ENSG00000156976	EIF4A2	protein_coding
4:2794750-2842825	ENSG00000087266	SH3BP2	protein_coding
4:48807229-48863834	ENSG00000109180	OCIAD1	protein_coding
4:56719782-56771200	ENSG00000090989	EXOC1	protein_coding
4:83739814-83822319	ENSG00000138674	SEC31A	protein_coding
4:100869243-100871545	ENSG00000164032	H2AFZ	protein_coding
4:108968701-109090112	ENSG00000138795	LEF1	protein_coding
4:147175127-147443123	ENSG00000120519	SLC10A7	protein_coding
5:271736-353971	ENSG00000249915	PDCD6	protein_coding
5:850406-892939	ENSG00000028310	BRD9	protein_coding
5:10250033-10266524	ENSG00000150753	CCT5	protein_coding
5:10679342-10761384	ENSG00000112977	DAP	protein_coding
5:14143811-14532235	ENSG00000038382	TRIO	protein_coding
5:31400604-31532303	ENSG00000113360	DROSHA	protein_coding
5:32531739-32604185	ENSG00000113387	SUB1	protein_coding
5:36876861-37066515	ENSG00000164190	NIPBL	protein_coding
5:41730167-41870621	ENSG00000083720	OXCT1	protein_coding
5:43602794-43707507	ENSG00000112992	NNT	protein_coding
5:60169658-60240900	ENSG00000049167	ERCC8	protein_coding
5:68646811-68665840	ENSG00000085231	TAF9	protein_coding
5:70883115-70954531	ENSG00000131844	MCCC2	protein_coding
5:137946656-138270723	ENSG00000044115	CTNNA1	protein_coding
6:4021501-4065217	ENSG00000112739	PRPF4B	protein_coding
6:8073593-8102811	ENSG00000124802	EEF1E1	protein_coding
6:18224099-18265054	ENSG00000124795	DEK	protein_coding
6:26124373-26139344	ENSG00000180573	HIST1H2AC	protein_coding
6:26197068-26199521	ENSG00000197409	HIST1H3D	protein_coding
6:26281283-26285762	ENSG00000158406	HIST1H4H	protein_coding
6:42847356-42857663	ENSG00000146223	RPL7L1	protein_coding
6:52128807-52149679	ENSG00000112118	MCM3	protein_coding
6:53132196-53213947	ENSG00000012660	ELOVL5	protein_coding
6:74225473-74233520	ENSG00000156508	EEF1A1	protein_coding
6:90352218-90529442	ENSG00000112159	MDN1	protein_coding
6:108188960-108279393	ENSG00000025796	SEC63	protein_coding
6:114254192-114332472	ENSG00000196591	HDAC2	protein_coding
6:131160487-131384462	ENSG00000079819	EPB41L2	protein_coding
6:135281516-135424194	ENSG00000112339	HBS1L	protein_coding
6:139224630-139309398	ENSG00000135597	REPS1	protein_coding
6:143072604-143266338	ENSG00000010818	HIVEP2	protein_coding
6:146185381-146285559	ENSG00000146414	SHPRH	protein_coding
6:153291664-153304714	ENSG00000112029	FBXO5	protein_coding
6:157802165-158099178	ENSG00000175048	ZDHHC14	protein_coding
6:160199530-160210781	ENSG00000120438	TCP1	protein_coding
6:161551011-161695093	ENSG00000026652	AGPAT4	protein_coding
7:1855429-2272878	ENSG00000002822	MAD1L1	protein_coding
7:12370511-12443567	ENSG00000146530	VWDE	protein_coding
7:32535038-33078516	ENSG00000105778	AVL9	protein_coding
7:98625061-98741723	ENSG00000198742	SMURF1	protein_coding
7:137559725-137686813	ENSG00000182158	CREB3L2	protein_coding
7:155437145-155574179	ENSG00000184863	RBM33	protein_coding
X:48644962-48652716	ENSG00000102145	GATA1	protein_coding
X:77320685-77384793	ENSG00000102144	PGK1	protein_coding
X:95939662-96859996	ENSG00000147202	DIAPH2	protein_coding
X:122993574-123047829	ENSG00000101966	XIAP	protein_coding
X:137713735-138304939	ENSG00000129682	FGF13	protein_coding
X:153991031-154005964	ENSG00000130826	DKC1	protein_coding
9:139305110-139318213	ENSG00000165688	PMPCA	protein_coding
10:70090931-70102948	ENSG00000096746	HNRNPH3	protein_coding
10:71029740-71161638	ENSG00000156515	HK1	protein_coding
11:12115543-12285334	ENSG00000133816	MICAL2	protein_coding
11:14515329-14665181	ENSG00000129084	PSMA1	protein_coding
11:32605344-32627808	ENSG00000149100	EIF3M	protein_coding
11:43380482-43516483	ENSG00000052841	TTC17	protein_coding
11:111597632-111637151	ENSG00000137713	PPP2R1B	protein_coding
11:118868852-118886501	ENSG00000186166	CCDC84	protein_coding
11:126293254-126873355	ENSG00000149571	KIRREL3	protein_coding
12:7085348-7125814	ENSG00000111684	LPCAT3	protein_coding
12:48176505-48226915	ENSG00000061273	HDAC7	protein_coding
12:131356424-131362223	ENSG00000132341	RAN	protein_coding
12:133066137-133161774	ENSG00000112787	FBRSL1	protein_coding
13:98605912-98676551	ENSG00000065150	IPO5	protein_coding
14:73525144-73588122	ENSG00000119707	RBM25	protein_coding
14:100437786-100610573	ENSG00000196405	EVL	protein_coding
14:102547075-102606036	ENSG00000080824	HSP90AA1	protein_coding
15:22892005-23006016	ENSG00000068793	CYFIP1	protein_coding
15:34525460-34630261	ENSG00000140199	SLC12A6	protein_coding
15:60639333-60695082	ENSG00000182718	ANXA2	protein_coding
15:70340129-70390515	ENSG00000140332	TLE3	protein_coding
15:76507696-76603813	ENSG00000140374	ETFA	protein_coding
15:78423840-78464291	ENSG00000166411	IDH3A	protein_coding
15:81451916-81605104	ENSG00000172349	IL16	protein_coding
16:11038345-11276046	ENSG00000038532	CLEC16A	protein_coding
16:11844442-11891123	ENSG00000122299	ZC3H7A	protein_coding
16:67552321-67580691	ENSG00000039523	FAM65A	protein_coding
17:1553923-1588176	ENSG00000174231	PRPF8	protein_coding
17:1682779-1733928	ENSG00000186532	SMYD4	protein_coding
17:1732996-1803376	ENSG00000132383	RPA1	protein_coding
17:1963133-2207065	ENSG00000070366	SMG6	protein_coding
17:2308856-2415185	ENSG00000127804	METTL16	protein_coding
17:2496504-2588909	ENSG00000007168	PAFAH1B1	protein_coding
17:3827169-3867736	ENSG00000074370	ATP2A3	protein_coding
17:4613784-4624794	ENSG00000141480	ARRB2	protein_coding
17:4736683-4801356	ENSG00000141503	MINK1	protein_coding
17:4871287-4890960	ENSG00000108509	CAMTA2	protein_coding
17:5322961-5336196	ENSG00000129197	RPAIN	protein_coding
17:5402747-5522744	ENSG00000091592	NLRP1	protein_coding
17:7387685-7417933	ENSG00000181222	POLR2A	protein_coding
17:7788124-7816078	ENSG00000170004	CHD3	protein_coding
17:8377523-8534079	ENSG00000133026	MYH10	protein_coding
17:15932471-16121499	ENSG00000141027	NCOR1	protein_coding
17:17584787-17714767	ENSG00000108557	RAI1	protein_coding
17:25783670-25953461	ENSG00000141068	KSR1	protein_coding
17:26368763-26523407	ENSG00000087095	NLK	protein_coding
17:26989109-27029697	ENSG00000109111	SUPT6H	protein_coding
17:27952956-28257294	ENSG00000141298	SSH2	protein_coding
17:28575218-28619074	ENSG00000108578	BLMH	protein_coding
17:29036317-29117926	ENSG00000264538	SUZ12P	pseudogene
17:33905065-34053436	ENSG00000006125	AP2B1	protein_coding
17:38214543-38250120	ENSG00000126351	THRA	protein_coding
17:40439565-40463961	ENSG00000126561	STAT5A	protein_coding
17:76106539-76128488	ENSG00000141524	TMC6	protein_coding
17:78234665-78372586	ENSG00000173821	RNF213	protein_coding
17:78518619-78940171	ENSG00000141564	RPTOR	protein_coding
17:79218800-79269347	ENSG00000157637	SLC38A10	protein_coding
17:80059336-80170706	ENSG00000176155	CCDC57	protein_coding
17:80196899-80231607	ENSG00000141551	CSNK1D	protein_coding
20:34291531-34330234	ENSG00000131051	RBM39	protein_coding
19:1407568-1435719	ENSG00000071626	DAZAP1	protein_coding
19:2328614-2355099	ENSG00000005206	SPPL2B	processed_transcript
19:5916150-5978153	ENSG00000031823	RANBP3	protein_coding
19:7895119-7929862	ENSG00000142459	EVI5L	protein_coding
19:7968728-7979363	ENSG00000076984	MAP2K7	protein_coding
19:16466050-16582896	ENSG00000127527	EPS15L1	protein_coding
19:40325098-40337054	ENSG00000105202	FBL	protein_coding
19:46318668-46366548	ENSG00000125755	SYMPK	protein_coding
19:53569859-53606689	ENSG00000170949	ZNF160	protein_coding
19:58739960-58788815	ENSG00000198131	ZNF544	protein_coding
22:38507502-38601697	ENSG00000184381	PLA2G6	protein_coding
22:45064593-45133561	ENSG00000186654	PRR5	protein_coding
22:47158518-47571336	ENSG00000054611	TBC1D22A	protein_coding
21:36160098-37376965	ENSG00000159216	RUNX1	protein_coding
21:46825052-46933634	ENSG00000182871	COL18A1	protein_coding
21:47608055-47648738	ENSG00000160285	LSS	protein_coding
21:47744036-47865682	ENSG00000160299	PCNT	protein_coding

## Sheet: MISO
Type	event_name		sample1_posterior_mean	sample1_ci_low	sample1_ci_high	sample2_posterior_mean	sample2_ci_low	sample2_ci_high	diff	bayes_factor	isoforms	sample1_counts	sample1_assigned_counts	sample2_counts	sample2_assigned_counts	chrom
A3SS	17:74513049:74513172:-@17:74505321|74505640:74504669:-	ENSG00000171302	0.74	0.57	0.89	0.29	0.2	0.41	0.45	8.04892e+06	('17:74513049:74513172:-@17:74505321|74505640:74504669:-.A.coreAndExt_17:74513049:74513172:-@17:74505321|74505640:74504669:-.A.up', '17:74513049:74513172:-@17:74505321|74505640:74504669:-.B.core_17:74513049:74513172:-@17:74505321|74505640:74504669:-.B.up')	(0,0):164,(1,0):104,(1,1):200	0:250,1:54	(0,0):155,(1,0):37,(1,1):181	0:90,1:128	17
A3SS	18:72829821:72830020:-@18:72821415|72829471:72819777:-	ENSG00000197971	0.26	0.17	0.38	0.8	0.53	0.99	-0.54	1631.06	('18:72829821:72830020:-@18:72821415|72829471:72819777:-.A.coreAndExt_18:72829821:72830020:-@18:72821415|72829471:72819777:-.A.up', '18:72829821:72830020:-@18:72821415|72829471:72819777:-.B.core_18:72829821:72830020:-@18:72821415|72829471:72819777:-.B.up')	(0,0):3,(1,0):48,(1,1):37	0:60,1:25	(0,0):5,(1,0):76,(1,1):15	0:89,1:2	18
A3SS	19:55997286:55997719:-@19:55994027|55994426:55993963:-	ENSG00000220988,ENSG00000221381,ENSG00000167747,ENSG00000221241	0.24	0.18	0.31	0.5	0.39	0.63	-0.26	1455.26	('19:55997286:55997719:-@19:55994027|55994426:55993963:-.A.coreAndExt_19:55997286:55997719:-@19:55994027|55994426:55993963:-.A.up', '19:55997286:55997719:-@19:55994027|55994426:55993963:-.B.core_19:55997286:55997719:-@19:55994027|55994426:55993963:-.B.up')	(0,0):1048,(1,0):89,(1,1):160	0:121,1:128	(0,0):840,(1,0):135,(1,1):116	0:205,1:46	19
A3SS	17:22657361:22658035:+@17:22658897|22660253:22660425:+	ENSG00000109046	0.72	0.65	0.78	0.48	0.39	0.58	0.24	716.64	('17:22657361:22658035:+@17:22658897|22660253:22660425:+.A.up_17:22657361:22658035:+@17:22658897|22660253:22660425:+.A.coreAndExt', '17:22657361:22658035:+@17:22658897|22660253:22660425:+.B.up_17:22657361:22658035:+@17:22658897|22660253:22660425:+.B.core')	(0,0):414,(0,1):31,(1,0):409,(1,1):59	0:451,1:48	(0,0):240,(0,1):29,(1,0):153,(1,1):43	0:168,1:57	17
A3SS	17:73634453:73634695:-@17:73634275|73634320:73634200:-	ENSG00000141524	0.73	0.44	0.98	0.16	0.03	0.45	0.57	203.74	('17:73634453:73634695:-@17:73634275|73634320:73634200:-.A.coreAndExt_17:73634453:73634695:-@17:73634275|73634320:73634200:-.A.up', '17:73634453:73634695:-@17:73634275|73634320:73634200:-.B.core_17:73634453:73634695:-@17:73634275|73634320:73634200:-.B.up')	(0,0):292,(1,0):15,(1,1):43	0:52,1:6	(0,0):80,(1,1):20	0:0,1:20	17
A3SS	15:57146255:57146574:+@15:57155445|57155448:57155706:+	ENSG00000157450	0.89	0.69	0.99	0.42	0.16	0.72	0.47	53.48	('15:57146255:57146574:+@15:57155445|57155448:57155706:+.A.up_15:57146255:57146574:+@15:57155445|57155448:57155706:+.A.coreAndExt', '15:57146255:57146574:+@15:57155445|57155448:57155706:+.B.up_15:57146255:57146574:+@15:57155445|57155448:57155706:+.B.core')	(0,0):196,(1,0):11,(1,1):30	0:37,1:4	(0,0):166,(0,1):6,(1,0):4,(1,1):26	0:15,1:21	15
A3SS	17:7778508:7779188:+@17:7780281|7780409:7780525:+	ENSG00000170037	0.11	0.03	0.23	0.47	0.23	0.73	-0.36	31.84	('17:7778508:7779188:+@17:7780281|7780409:7780525:+.A.up_17:7778508:7779188:+@17:7780281|7780409:7780525:+.A.coreAndExt', '17:7778508:7779188:+@17:7780281|7780409:7780525:+.B.up_17:7778508:7779188:+@17:7780281|7780409:7780525:+.B.core')	(0,0):163,(0,1):14,(1,0):2,(1,1):25	0:5,1:36	(0,0):94,(0,1):3,(1,0):5,(1,1):20	0:16,1:12	17
A3SS	1:35269819:35269925:-@1:35268901|35268944:35268735:-	ENSG00000163867	0.08	0.01	0.27	0.53	0.27	0.83	-0.45	30.77	('1:35269819:35269925:-@1:35268901|35268944:35268735:-.A.coreAndExt_1:35269819:35269925:-@1:35268901|35268944:35268735:-.A.up', '1:35269819:35269925:-@1:35268901|35268944:35268735:-.B.core_1:35269819:35269925:-@1:35268901|35268944:35268735:-.B.up')	(0,0):148,(0,1):9,(1,0):1,(1,1):16	0:2,1:24	(0,0):126,(0,1):2,(1,0):6,(1,1):13	0:18,1:3	1
A3SS	3:58267014:58267184:+@3:58271057|58271076:58271173:+	ENSG00000163684,ENSG00000255154	0.72	0.35	1	0.09	0.01	0.28	0.63	28.57	('3:58267014:58267184:+@3:58271057|58271076:58271173:+.A.up_3:58267014:58267184:+@3:58271057|58271076:58271173:+.A.coreAndExt', '3:58267014:58267184:+@3:58271057|58271076:58271173:+.B.up_3:58267014:58267184:+@3:58271057|58271076:58271173:+.B.core')	(0,0):102,(1,0):3,(1,1):5	1904-01-01 00:08:00	(0,0):113,(0,1):8,(1,1):12	0:1,1:19	3
A3SS	7:99781424:99781527:+@7:99785276|99785290:99785446:+	ENSG00000121716	0.87	0.6	0.99	0.41	0.11	0.7	0.46	20.83	('7:99781424:99781527:+@7:99785276|99785290:99785446:+.A.up_7:99781424:99781527:+@7:99785276|99785290:99785446:+.A.coreAndExt', '7:99781424:99781527:+@7:99785276|99785290:99785446:+.B.up_7:99781424:99781527:+@7:99785276|99785290:99785446:+.B.core')	(0,0):624,(1,0):8,(1,1):14	0:20,1:2	(0,0):349,(0,1):4,(1,0):3,(1,1):6	0:7,1:6	7
A3SS	4:48244358:48244543:-@4:48243042|48243045:48242841:-	ENSG00000075539	0.52	0.3	0.71	0.88	0.69	0.98	-0.36	19.73	('4:48244358:48244543:-@4:48243042|48243045:48242841:-.A.coreAndExt_4:48244358:48244543:-@4:48243042|48243045:48242841:-.A.up', '4:48244358:48244543:-@4:48243042|48243045:48242841:-.B.core_4:48244358:48244543:-@4:48243042|48243045:48242841:-.B.up')	(0,0):116,(0,1):9,(1,0):11,(1,1):35	0:33,1:22	(0,0):112,(0,1):1,(1,0):15,(1,1):33	0:47,1:2	4
A3SS	13:35903162:35904866:+@13:35905170|35905173:35905358:+	ENSG00000133101	0.5	0.35	0.64	0.76	0.64	0.86	-0.26	19.18	('13:35903162:35904866:+@13:35905170|35905173:35905358:+.A.up_13:35903162:35904866:+@13:35905170|35905173:35905358:+.A.coreAndExt', '13:35903162:35904866:+@13:35905170|35905173:35905358:+.B.up_13:35903162:35904866:+@13:35905170|35905173:35905358:+.B.core')	(0,0):69,(0,1):22,(1,0):23,(1,1):80	0:61,1:64	(0,0):78,(0,1):13,(1,0):43,(1,1):124	0:129,1:51	13
A3SS	2:68400408:68400696:-@2:68399958|68400102:68399858:-	ENSG00000119865	0.88	0.75	0.97	0.54	0.36	0.74	0.34	17.25	('2:68400408:68400696:-@2:68399958|68400102:68399858:-.A.coreAndExt_2:68400408:68400696:-@2:68399958|68400102:68399858:-.A.up', '2:68400408:68400696:-@2:68399958|68400102:68399858:-.B.core_2:68400408:68400696:-@2:68399958|68400102:68399858:-.B.up')	(0,0):118,(0,1):2,(1,0):60,(1,1):11	0:70,1:3	(0,0):60,(0,1):5,(1,0):21,(1,1):11	0:29,1:8	2
A3SS	12:103969998:103970125:-@12:103967966|103968615:103967816:-	ENSG00000136010	0.08	0.05	0.13	0.58	0.2	0.96	-0.5	14.68	('12:103969998:103970125:-@12:103967966|103968615:103967816:-.A.coreAndExt_12:103969998:103970125:-@12:103967966|103968615:103967816:-.A.up', '12:103969998:103970125:-@12:103967966|103968615:103967816:-.B.core_12:103969998:103970125:-@12:103967966|103968615:103967816:-.B.up')	(0,0):82,(0,1):15,(1,0):31,(1,1):8	0:32,1:22	(0,0):17,(1,0):4	1904-01-01 00:04:00	12
A3SS	9:80053498:80053609:+@9:80056641|80056644:80056779:+	ENSG00000148019	0.2	0.02	0.58	0.82	0.45	0.99	-0.62	14.23	('9:80053498:80053609:+@9:80056641|80056644:80056779:+.A.up_9:80053498:80053609:+@9:80056641|80056644:80056779:+.A.coreAndExt', '9:80053498:80053609:+@9:80056641|80056644:80056779:+.B.up_9:80053498:80053609:+@9:80056641|80056644:80056779:+.B.core')	(0,0):131,(0,1):4	0:0,1:4	(0,0):82,(1,0):4,(1,1):2	1904-01-01 00:06:00	9
A3SS	17:4733724:4733840:+@17:4734299|4734594:4734812:+	ENSG00000141503	0.01	0	0.05	0.38	0.11	0.73	-0.37	13.55	('17:4733724:4733840:+@17:4734299|4734594:4734812:+.A.up_17:4733724:4733840:+@17:4734299|4734594:4734812:+.A.coreAndExt', '17:4733724:4733840:+@17:4734299|4734594:4734812:+.B.up_17:4733724:4733840:+@17:4734299|4734594:4734812:+.B.core')	(0,0):26,(0,1):11,(1,1):7	0:0,1:18	(0,0):25,(0,1):1,(1,0):5,(1,1):3	0:7,1:2	17
A3SS	1:78104611:78104664:+@1:78111274|78111277:78111393:+	ENSG00000180488	0.24	0.04	0.56	0.85	0.46	0.99	-0.61	13.38	('1:78104611:78104664:+@1:78111274|78111277:78111393:+.A.up_1:78104611:78104664:+@1:78111274|78111277:78111393:+.A.coreAndExt', '1:78104611:78104664:+@1:78111274|78111277:78111393:+.B.up_1:78104611:78104664:+@1:78111274|78111277:78111393:+.B.core')	(0,0):127,(0,1):5,(1,0):1	0:1,1:5	(0,0):70,(1,0):7,(1,1):1	0:7,1:1	1
A3SS	22:45120983:45121105:+@22:45124852|45124907:45125024:+	ENSG00000100416	0.31	0.1	0.56	0.83	0.56	0.98	-0.52	12.58	('22:45120983:45121105:+@22:45124852|45124907:45125024:+.A.up_22:45120983:45121105:+@22:45124852|45124907:45125024:+.A.coreAndExt', '22:45120983:45121105:+@22:45124852|45124907:45125024:+.B.up_22:45120983:45121105:+@22:45124852|45124907:45125024:+.B.core')	(0,0):142,(0,1):4,(1,0):4,(1,1):2	0:4,1:6	(0,0):136,(0,1):1,(1,0):14,(1,1):2	0:15,1:2	22
A3SS	1:172182237:172182369:-@1:172179349|172179376:172179203:-	ENSG00000135870	0.32	0.15	0.55	0.72	0.52	0.91	-0.4	12.08	('1:172182237:172182369:-@1:172179349|172179376:172179203:-.A.coreAndExt_1:172182237:172182369:-@1:172179349|172179376:172179203:-.A.up', '1:172182237:172182369:-@1:172179349|172179376:172179203:-.B.core_1:172182237:172182369:-@1:172179349|172179376:172179203:-.B.up')	(0,0):188,(0,1):9,(1,0):6,(1,1):14	0:8,1:21	(0,0):162,(0,1):4,(1,0):15,(1,1):8	0:20,1:7	1
A3SS	15:58555554:58555658:-@15:58547653|58547813:58547552:-	ENSG00000128915	0.38	0.24	0.59	0.81	0.59	0.97	-0.43	10.65	('15:58555554:58555658:-@15:58547653|58547813:58547552:-.A.coreAndExt_15:58555554:58555658:-@15:58547653|58547813:58547552:-.A.up', '15:58555554:58555658:-@15:58547653|58547813:58547552:-.B.core_15:58555554:58555658:-@15:58547653|58547813:58547552:-.B.up')	(0,0):379,(0,1):9,(1,0):34,(1,1):2	0:35,1:10	(0,0):254,(0,1):1,(1,0):39	0:39,1:1	15
A3SS	9:138862207:138862556:+@9:138863384|138863501:138863863:+	ENSG00000054148	0.44	0.3	0.59	0.14	0.04	0.29	0.3	10.42	('9:138862207:138862556:+@9:138863384|138863501:138863863:+.A.up_9:138862207:138862556:+@9:138863384|138863501:138863863:+.A.coreAndExt', '9:138862207:138862556:+@9:138863384|138863501:138863863:+.B.up_9:138862207:138862556:+@9:138863384|138863501:138863863:+.B.core')	(0,0):216,(0,1):5,(1,0):24,(1,1):135	0:91,1:73	(0,0):135,(0,1):1,(1,0):3,(1,1):92	0:10,1:86	9
A3SS	3:139793386:139793488:-@3:139774464|139774516:139774391:-	ENSG00000114107	0.13	0.08	0.2	0.42	0.22	0.67	-0.29	9.98	('3:139793386:139793488:-@3:139774464|139774516:139774391:-.A.coreAndExt_3:139793386:139793488:-@3:139774464|139774516:139774391:-.A.up', '3:139793386:139793488:-@3:139774464|139774516:139774391:-.B.core_3:139793386:139793488:-@3:139774464|139774516:139774391:-.B.up')	(0,0):859,(0,1):36,(1,0):16,(1,1):9	0:19,1:42	(0,0):297,(0,1):6,(1,0):11	0:11,1:6	3
A3SS	15:79376309:79376474:+@15:79378700|79378776:79379871:+	ENSG00000172349	0.43	0.28	0.6	0.15	0.07	0.26	0.28	9.83	('15:79376309:79376474:+@15:79378700|79378776:79379871:+.A.up_15:79376309:79376474:+@15:79378700|79378776:79379871:+.A.coreAndExt', '15:79376309:79376474:+@15:79378700|79378776:79379871:+.B.up_15:79376309:79376474:+@15:79378700|79378776:79379871:+.B.core')	(0,0):143,(0,1):9,(1,0):15,(1,1):221	0:115,1:130	(0,0):161,(0,1):24,(1,0):6,(1,1):201	0:22,1:209	15
A3SS	17:73634453:73634695:-@17:73634272|73634320:73634200:-	ENSG00000141524	0.68	0.38	0.9	0.17	0.03	0.52	0.51	9.38	('17:73634453:73634695:-@17:73634272|73634320:73634200:-.A.coreAndExt_17:73634453:73634695:-@17:73634272|73634320:73634200:-.A.up', '17:73634453:73634695:-@17:73634272|73634320:73634200:-.B.core_17:73634453:73634695:-@17:73634272|73634320:73634200:-.B.up')	(0,0):292,(1,0):15,(1,1):43	0:41,1:17	(0,0):80,(1,1):20	0:3,1:17	17
A3SS	20:58078283:58078493:+@20:58079047|58079438:58080622:+	ENSG00000176659	0.86	0.66	1	0.35	0.1	0.64	0.51	9.26	('20:58078283:58078493:+@20:58079047|58079438:58080622:+.A.up_20:58078283:58078493:+@20:58079047|58079438:58080622:+.A.coreAndExt', '20:58078283:58078493:+@20:58079047|58079438:58080622:+.B.up_20:58078283:58078493:+@20:58079047|58079438:58080622:+.B.core')	(0,0):20,(1,0):20,(1,1):35	0:50,1:5	(0,0):11,(1,0):3,(1,1):24	0:18,1:9	20
A3SS	16:625282:625775:-@16:624957|625064:624890:-	ENSG00000130731	0.46	0.27	0.66	0.83	0.62	0.97	-0.37	9.15	('16:625282:625775:-@16:624957|625064:624890:-.A.coreAndExt_16:625282:625775:-@16:624957|625064:624890:-.A.up', '16:625282:625775:-@16:624957|625064:624890:-.B.core_16:625282:625775:-@16:624957|625064:624890:-.B.up')	(0,0):252,(0,1):8,(1,0):17,(1,1):35	0:24,1:36	(0,0):210,(0,1):1,(1,0):22,(1,1):25	0:44,1:4	16
A3SS	17:16270761:16270916:+@17:16271488|16271491:16271586:+	ENSG00000239203,ENSG00000187688	0.84	0.66	0.95	0.44	0.14	0.73	0.4	8.73	('17:16270761:16270916:+@17:16271488|16271491:16271586:+.A.up_17:16270761:16270916:+@17:16271488|16271491:16271586:+.A.coreAndExt', '17:16270761:16270916:+@17:16271488|16271491:16271586:+.B.up_17:16270761:16270916:+@17:16271488|16271491:16271586:+.B.core')	(0,0):95,(0,1):2,(1,0):15,(1,1):10	0:24,1:3	(0,0):96,(0,1):5,(1,0):4,(1,1):24	0:13,1:20	17
A3SS	11:46345778:46345873:+@11:46346128|46346131:46346205:+	ENSG00000149091	0.69	0.4	0.96	0.13	0.01	0.47	0.56	8.58	('11:46345778:46345873:+@11:46346128|46346131:46346205:+.A.up_11:46345778:46345873:+@11:46346128|46346131:46346205:+.A.coreAndExt', '11:46345778:46345873:+@11:46346128|46346131:46346205:+.B.up_11:46345778:46345873:+@11:46346128|46346131:46346205:+.B.core')	(0,0):116,(1,0):3	1904-01-01 00:03:00	(0,0):75,(0,1):4	0:0,1:4	11
A3SS	19:5902404:5902607:-@19:5901883|5901886:5901728:-	ENSG00000031823	0.14	0.03	0.41	0.71	0.3	0.98	-0.57	8.56	('19:5902404:5902607:-@19:5901883|5901886:5901728:-.A.coreAndExt_19:5902404:5902607:-@19:5901883|5901886:5901728:-.A.up', '19:5902404:5902607:-@19:5901883|5901886:5901728:-.B.core_19:5902404:5902607:-@19:5901883|5901886:5901728:-.B.up')	(0,0):53,(0,1):4,(1,1):8	0:1,1:11	(0,0):33,(1,0):1,(1,1):3	0:3,1:1	19
A3SS	9:32978081:32978127:-@9:32977729|32977844:32977542:-	ENSG00000137074	0.33	0.19	0.49	0.7	0.48	0.89	-0.37	8.34	('9:32978081:32978127:-@9:32977729|32977844:32977542:-.A.coreAndExt_9:32978081:32978127:-@9:32977729|32977844:32977542:-.A.up', '9:32978081:32978127:-@9:32977729|32977844:32977542:-.B.core_9:32978081:32978127:-@9:32977729|32977844:32977542:-.B.up')	(0,0):83,(0,1):3,(1,0):23,(1,1):27	0:32,1:21	(0,0):107,(0,1):2,(1,0):38,(1,1):12	0:47,1:5	9
A3SS	17:23686493:23686641:-@17:23683334|23683535:23683299:-	ENSG00000109083	0.12	0.04	0.43	0.63	0.28	0.96	-0.51	8.26	('17:23686493:23686641:-@17:23683334|23683535:23683299:-.A.coreAndExt_17:23686493:23686641:-@17:23683334|23683535:23683299:-.A.up', '17:23686493:23686641:-@17:23683334|23683535:23683299:-.B.core_17:23686493:23686641:-@17:23683334|23683535:23683299:-.B.up')	(0,0):75,(1,0):8,(1,1):11	0:10,1:9	(0,0):58,(1,0):17,(1,1):2	1904-01-01 00:19:00	17
A3SS	16:2919615:2920012:+@16:2920412|2920415:2920882:+	ENSG00000059122	0.96	0.87	1	0.64	0.36	0.88	0.32	8.18	('16:2919615:2920012:+@16:2920412|2920415:2920882:+.A.up_16:2919615:2920012:+@16:2920412|2920415:2920882:+.A.coreAndExt', '16:2919615:2920012:+@16:2920412|2920415:2920882:+.B.up_16:2919615:2920012:+@16:2920412|2920415:2920882:+.B.core')	(0,0):101,(1,0):25,(1,1):228	0:251,1:2	(0,0):30,(0,1):2,(1,0):5,(1,1):60	0:49,1:18	16
A3SS	7:44115412:44115465:+@7:44115781|44116139:44116248:+	ENSG00000106624	0.08	0.01	0.48	0.63	0.21	0.95	-0.55	7.94	('7:44115412:44115465:+@7:44115781|44116139:44116248:+.A.up_7:44115412:44115465:+@7:44115781|44116139:44116248:+.A.coreAndExt', '7:44115412:44115465:+@7:44115781|44116139:44116248:+.B.up_7:44115412:44115465:+@7:44115781|44116139:44116248:+.B.core')	(0,0):26,(0,1):3,(1,0):3	0:3,1:3	(0,0):20,(1,0):6	1904-01-01 00:06:00	7
A3SS	17:50395666:50395791:-@17:50393672|50393686:50393479:-	ENSG00000166260	0.63	0.29	0.9	0.16	0.04	0.42	0.47	7.68	('17:50395666:50395791:-@17:50393672|50393686:50393479:-.A.coreAndExt_17:50395666:50395791:-@17:50393672|50393686:50393479:-.A.up', '17:50395666:50395791:-@17:50393672|50393686:50393479:-.B.core_17:50395666:50395791:-@17:50393672|50393686:50393479:-.B.up')	(0,0):1257,(0,1):2,(1,0):4,(1,1):9	0:12,1:3	(0,0):937,(0,1):8,(1,0):1,(1,1):8	0:1,1:16	17
A3SS	20:43482386:43482483:+@20:43482562|43482582:43482747:+	ENSG00000124155	0.06	0.01	0.15	0.29	0.14	0.47	-0.23	7.67	('20:43482386:43482483:+@20:43482562|43482582:43482747:+.A.up_20:43482386:43482483:+@20:43482562|43482582:43482747:+.A.coreAndExt', '20:43482386:43482483:+@20:43482562|43482582:43482747:+.B.up_20:43482386:43482483:+@20:43482562|43482582:43482747:+.B.core')	(0,0):159,(0,1):29,(1,0):2,(1,1):30	0:3,1:58	(0,0):119,(0,1):16,(1,0):9,(1,1):19	0:17,1:27	20
A3SS	X:154880440:154880646:+@X:154884189|154884267:154884367:+	ENSG00000124334	0.31	0.16	0.53	0.76	0.43	0.96	-0.45	7.66	('X:154880440:154880646:+@X:154884189|154884267:154884367:+.A.up_X:154880440:154880646:+@X:154884189|154884267:154884367:+.A.coreAndExt', 'X:154880440:154880646:+@X:154884189|154884267:154884367:+.B.up_X:154880440:154880646:+@X:154884189|154884267:154884367:+.B.core')	(0,0):326,(0,1):9,(1,0):7,(1,1):2	0:8,1:10	(0,0):110,(0,1):1,(1,0):7,(1,1):1	0:8,1:1	X
A3SS	12:103206626:103206948:+@12:103229164|103229198:103229320:+	ENSG00000255150,ENSG00000198431	0.17	0.09	0.26	0.39	0.26	0.54	-0.22	7.65	('12:103206626:103206948:+@12:103229164|103229198:103229320:+.A.up_12:103206626:103206948:+@12:103229164|103229198:103229320:+.A.coreAndExt', '12:103206626:103206948:+@12:103229164|103229198:103229320:+.B.up_12:103206626:103206948:+@12:103229164|103229198:103229320:+.B.core')	(0,0):527,(0,1):49,(1,0):12,(1,1):19	0:17,1:63	(0,0):459,(0,1):23,(1,0):19,(1,1):12	0:23,1:31	12
A3SS	19:3524690:3524798:+@19:3525339|3525368:3525584:+	ENSG00000064961	0.19	0.03	0.47	0.71	0.38	0.97	-0.52	7.36	('19:3524690:3524798:+@19:3525339|3525368:3525584:+.A.up_19:3524690:3524798:+@19:3525339|3525368:3525584:+.A.coreAndExt', '19:3524690:3524798:+@19:3525339|3525368:3525584:+.B.up_19:3524690:3524798:+@19:3525339|3525368:3525584:+.B.core')	(0,0):126,(0,1):2,(1,0):2,(1,1):42	0:17,1:29	(0,0):66,(1,0):7,(1,1):26	0:23,1:10	19
A3SS	10:127421617:127421835:+@10:127424266|127424331:127424489:+	ENSG00000107938	0.48	0.23	0.82	0.91	0.7	1	-0.43	7.3	('10:127421617:127421835:+@10:127424266|127424331:127424489:+.A.up_10:127421617:127421835:+@10:127424266|127424331:127424489:+.A.coreAndExt', '10:127421617:127421835:+@10:127424266|127424331:127424489:+.B.up_10:127421617:127421835:+@10:127424266|127424331:127424489:+.B.core')	(0,0):97,(0,1):1,(1,0):5,(1,1):14	0:12,1:8	(0,0):70,(1,0):16,(1,1):8	0:22,1:2	10
A3SS	12:55004345:55004544:-@12:55004233|55004236:55004088:-	ENSG00000135473	0.87	0.66	1	0.43	0.16	0.72	0.44	7	('12:55004345:55004544:-@12:55004233|55004236:55004088:-.A.coreAndExt_12:55004345:55004544:-@12:55004233|55004236:55004088:-.A.up', '12:55004345:55004544:-@12:55004233|55004236:55004088:-.B.core_12:55004345:55004544:-@12:55004233|55004236:55004088:-.B.up')	(0,0):52,(1,0):9,(1,1):21	0:27,1:3	(0,0):27,(0,1):4,(1,0):3,(1,1):12	0:7,1:12	12
A3SS	3:50352991:50353385:-@3:50350446|50350458:50350340:-	ENSG00000068028	0.22	0.02	0.54	0.74	0.29	0.98	-0.52	6.63	('3:50352991:50353385:-@3:50350446|50350458:50350340:-.A.coreAndExt_3:50352991:50353385:-@3:50350446|50350458:50350340:-.A.up', '3:50352991:50353385:-@3:50350446|50350458:50350340:-.B.core_3:50352991:50353385:-@3:50350446|50350458:50350340:-.B.up')	(0,0):241,(0,1):2,(1,1):13	0:1,1:14	(0,0):96,(1,0):2,(1,1):2	1904-01-01 00:04:00	3
A3SS	9:134975504:134975697:-@9:134974893|134974929:134974834:-	ENSG00000160271	0.17	0.07	0.32	0.49	0.27	0.73	-0.32	6.44	('9:134975504:134975697:-@9:134974893|134974929:134974834:-.A.coreAndExt_9:134975504:134975697:-@9:134974893|134974929:134974834:-.A.up', '9:134975504:134975697:-@9:134974893|134974929:134974834:-.B.core_9:134975504:134975697:-@9:134974893|134974929:134974834:-.B.up')	(0,0):110,(0,1):15,(1,0):6,(1,1):34	0:8,1:47	(0,0):58,(0,1):4,(1,0):10,(1,1):14	0:18,1:10	9
A3SS	12:122668515:122669337:+@12:122669932|122669948:122670224:+	ENSG00000111364	0.69	0.56	0.81	0.91	0.79	0.98	-0.22	6.35	('12:122668515:122669337:+@12:122669932|122669948:122670224:+.A.up_12:122668515:122669337:+@12:122669932|122669948:122670224:+.A.coreAndExt', '12:122668515:122669337:+@12:122669932|122669948:122670224:+.B.up_12:122668515:122669337:+@12:122669932|122669948:122670224:+.B.core')	(0,0):114,(0,1):13,(1,0):32,(1,1):96	0:85,1:56	(0,0):133,(0,1):2,(1,0):29,(1,1):121	0:132,1:20	12
A3SS	5:179180448:179180747:+@5:179182564|179182632:179182659:+	ENSG00000161011	0.65	0.53	0.77	0.43	0.33	0.55	0.22	6.2	('5:179180448:179180747:+@5:179182564|179182632:179182659:+.A.up_5:179180448:179180747:+@5:179182564|179182632:179182659:+.A.coreAndExt', '5:179180448:179180747:+@5:179182564|179182632:179182659:+.B.up_5:179180448:179180747:+@5:179182564|179182632:179182659:+.B.core')	(0,0):760,(1,0):137,(1,1):310	0:328,1:119	(0,0):737,(1,0):78,(1,1):274	0:240,1:112	5
A3SS	11:85036611:85036781:+@11:85038941|85039004:85039033:+	ENSG00000171202	0.78	0.43	0.99	0.29	0.06	0.62	0.49	6.17	('11:85036611:85036781:+@11:85038941|85039004:85039033:+.A.up_11:85036611:85036781:+@11:85038941|85039004:85039033:+.A.coreAndExt', '11:85036611:85036781:+@11:85038941|85039004:85039033:+.B.up_11:85036611:85036781:+@11:85038941|85039004:85039033:+.B.core')	(0,0):401,(1,0):7,(1,1):2	1904-01-01 00:09:00	(0,0):407,(1,0):3,(1,1):7	0:8,1:2	11
A3SS	1:149245412:149246719:-@1:149241806|149242068:149241265:-	ENSG00000143409	0.69	0.47	0.87	0.29	0.06	0.56	0.4	6.04	('1:149245412:149246719:-@1:149241806|149242068:149241265:-.A.coreAndExt_1:149245412:149246719:-@1:149241806|149242068:149241265:-.A.up', '1:149245412:149246719:-@1:149241806|149242068:149241265:-.B.core_1:149245412:149246719:-@1:149241806|149242068:149241265:-.B.up')	(0,0):70,(0,1):3,(1,0):18,(1,1):71	0:74,1:18	(0,0):63,(0,1):5,(1,0):3,(1,1):25	0:15,1:18	1
A3SS	2:219229117:219229439:-@2:219225038|219225267:219224668:-	ENSG00000115568	0.28	0.1	0.57	0.78	0.51	0.97	-0.5	5.99	('2:219229117:219229439:-@2:219225038|219225267:219224668:-.A.coreAndExt_2:219229117:219229439:-@2:219225038|219225267:219224668:-.A.up', '2:219229117:219229439:-@2:219225038|219225267:219224668:-.B.core_2:219229117:219229439:-@2:219225038|219225267:219224668:-.B.up')	(0,0):169,(1,0):6,(1,1):37	0:7,1:36	(0,0):135,(1,0):12,(1,1):25	0:36,1:1	2
A3SS	1:153996859:153997056:-@1:153994382|153994449:153994306:-	ENSG00000116580	0.13	0.01	0.36	0.6	0.25	0.91	-0.47	5.76	('1:153996859:153997056:-@1:153994382|153994449:153994306:-.A.coreAndExt_1:153996859:153997056:-@1:153994382|153994449:153994306:-.A.up', '1:153996859:153997056:-@1:153994382|153994449:153994306:-.B.core_1:153996859:153997056:-@1:153994382|153994449:153994306:-.B.up')	(0,0):124,(1,0):1,(1,1):17	0:1,1:17	(0,0):81,(1,0):3,(1,1):4	0:4,1:3	1
A3SS	7:91713040:91713171:-@7:91712744|91712926:91712677:-	ENSG00000001631	0.78	0.46	1	0.28	0.07	0.6	0.5	5.75	('7:91713040:91713171:-@7:91712744|91712926:91712677:-.A.coreAndExt_7:91713040:91713171:-@7:91712744|91712926:91712677:-.A.up', '7:91713040:91713171:-@7:91712744|91712926:91712677:-.B.core_7:91713040:91713171:-@7:91712744|91712926:91712677:-.B.up')	(0,0):36,(1,0):15,(1,1):2	1904-01-01 00:17:00	(0,0):25,(1,0):5,(1,1):4	0:5,1:4	7
A3SS	12:51975499:51975690:+@12:51976481|51976505:51976602:+	ENSG00000123349	0.64	0.32	0.88	0.23	0.06	0.51	0.41	5.74	('12:51975499:51975690:+@12:51976481|51976505:51976602:+.A.up_12:51975499:51975690:+@12:51976481|51976505:51976602:+.A.coreAndExt', '12:51975499:51975690:+@12:51976481|51976505:51976602:+.B.up_12:51975499:51975690:+@12:51976481|51976505:51976602:+.B.core')	(0,0):1656,(0,1):1,(1,0):4,(1,1):1	0:5,1:1	(0,0):1349,(0,1):1,(1,1):10	0:2,1:9	12
A3SS	8:124283629:124284164:-@8:124282875|124283403:124282593:-	ENSG00000204949	0.83	0.63	0.99	0.52	0.38	0.67	0.31	5.63	('8:124283629:124284164:-@8:124282875|124283403:124282593:-.A.coreAndExt_8:124283629:124284164:-@8:124282875|124283403:124282593:-.A.up', '8:124283629:124284164:-@8:124282875|124283403:124282593:-.B.core_8:124283629:124284164:-@8:124282875|124283403:124282593:-.B.up')	(0,0):174,(1,0):73,(1,1):79	0:133,1:19	(0,0):144,(1,0):57,(1,1):103	0:108,1:52	8
A3SS	6:31607052:31611241:-@6:31606934|31606937:31606809:-	ENSG00000198563,ENSG00000254870	0.36	0.18	0.53	0.75	0.46	0.92	-0.39	5.49	('6:31607052:31611241:-@6:31606934|31606937:31606809:-.A.coreAndExt_6:31607052:31611241:-@6:31606934|31606937:31606809:-.A.up', '6:31607052:31611241:-@6:31606934|31606937:31606809:-.B.core_6:31607052:31611241:-@6:31606934|31606937:31606809:-.B.up')	(0,0):2053,(0,1):13,(1,0):7,(1,1):2826	0:899,1:1947	(0,0):931,(0,1):2,(1,0):6,(1,1):1119	0:1037,1:90	6
A3SS	1:8776:14754:-@1:8232|8242:8131:-	ENSG00000227232	0.23	0.01	0.65	0.74	0.45	0.95	-0.51	5.43	('1:8776:14754:-@1:8232|8242:8131:-.A.coreAndExt_1:8776:14754:-@1:8232|8242:8131:-.A.up', '1:8776:14754:-@1:8232|8242:8131:-.B.core_1:8776:14754:-@1:8232|8242:8131:-.B.up')	(0,0):256,(0,1):1,(1,1):1490	0:299,1:1192	(0,0):226,(1,0):5,(1,1):1142	0:1109,1:38	1
A3SS	4:74224112:74224864:-@4:74219843|74219846:74219698:-	ENSG00000132466	0.89	0.78	0.96	0.67	0.52	0.81	0.22	5.28	('4:74224112:74224864:-@4:74219843|74219846:74219698:-.A.coreAndExt_4:74224112:74224864:-@4:74219843|74219846:74219698:-.A.up', '4:74224112:74224864:-@4:74219843|74219846:74219698:-.B.core_4:74224112:74224864:-@4:74219843|74219846:74219698:-.B.up')	(0,0):445,(0,1):3,(1,0):34,(1,1):374	0:384,1:27	(0,0):379,(0,1):11,(1,0):26,(1,1):347	0:275,1:109	4
A3SS	16:87452528:87452698:+@16:87453254|87453482:87453659:+	ENSG00000167515	0.64	0.37	0.9	0.28	0.17	0.43	0.36	5.16	('16:87452528:87452698:+@16:87453254|87453482:87453659:+.A.up_16:87452528:87452698:+@16:87453254|87453482:87453659:+.A.coreAndExt', '16:87452528:87452698:+@16:87453254|87453482:87453659:+.B.up_16:87452528:87452698:+@16:87453254|87453482:87453659:+.B.core')	(0,0):202,(1,0):40,(1,1):25	0:46,1:19	(0,0):346,(1,0):29,(1,1):41	0:37,1:33	16
A3SS	17:76780713:76780787:-@17:76779730|76779745:76779588:-	ENSG00000141577	0.82	0.48	0.98	0.28	0.01	0.69	0.54	5.12	('17:76780713:76780787:-@17:76779730|76779745:76779588:-.A.coreAndExt_17:76780713:76780787:-@17:76779730|76779745:76779588:-.A.up', '17:76780713:76780787:-@17:76779730|76779745:76779588:-.B.core_17:76780713:76780787:-@17:76779730|76779745:76779588:-.B.up')	(0,0):63,(1,0):5,(1,1):4	1904-01-01 00:09:00	(0,0):42,(0,1):3,(1,1):4	0:1,1:6	17
A3SS	3:51994263:51994327:+@3:51994390|51994417:51994521:+	ENSG00000243989,ENSG00000114786	0.17	0.03	0.45	0.62	0.29	0.95	-0.45	5.12	('3:51994263:51994327:+@3:51994390|51994417:51994521:+.A.up_3:51994263:51994327:+@3:51994390|51994417:51994521:+.A.coreAndExt', '3:51994263:51994327:+@3:51994390|51994417:51994521:+.B.up_3:51994263:51994327:+@3:51994390|51994417:51994521:+.B.core')	(0,0):100,(0,1):6,(1,0):1	0:1,1:6	(0,0):51,(0,1):1,(1,0):5	0:5,1:1	3
A3SS	5:180592265:180592495:+@5:180593019|180593242:180593369:+	ENSG00000146063	0.51	0.32	0.75	0.21	0.13	0.34	0.3	5.03	('5:180592265:180592495:+@5:180593019|180593242:180593369:+.A.up_5:180592265:180592495:+@5:180593019|180593242:180593369:+.A.coreAndExt', '5:180592265:180592495:+@5:180593019|180593242:180593369:+.B.up_5:180592265:180592495:+@5:180593019|180593242:180593369:+.B.core')	(0,0):221,(0,1):1,(1,0):46,(1,1):34	0:57,1:24	(0,0):169,(1,0):20,(1,1):41	0:24,1:37	5
A3SS	1:43628017:43628147:-@1:43626686|43626747:43626568:-	ENSG00000159479	0.67	0.48	0.84	0.3	0.13	0.53	0.37	5.01	('1:43628017:43628147:-@1:43626686|43626747:43626568:-.A.coreAndExt_1:43628017:43628147:-@1:43626686|43626747:43626568:-.A.up', '1:43628017:43628147:-@1:43626686|43626747:43626568:-.B.core_1:43628017:43628147:-@1:43626686|43626747:43626568:-.B.up')	(0,0):210,(0,1):6,(1,0):28,(1,1):5	0:30,1:9	(0,0):147,(0,1):6,(1,0):7,(1,1):8	0:10,1:11	1
A3SS	11:6457778:6458229:-@11:6457064|6457260:6456946:-	ENSG00000132254	0.13	0.06	0.23	0.35	0.22	0.51	-0.22	4.99	('11:6457778:6458229:-@11:6457064|6457260:6456946:-.A.coreAndExt_11:6457778:6458229:-@11:6457064|6457260:6456946:-.A.up', '11:6457778:6458229:-@11:6457064|6457260:6456946:-.B.core_11:6457778:6458229:-@11:6457064|6457260:6456946:-.B.up')	(0,0):175,(0,1):25,(1,0):8,(1,1):21	0:14,1:40	(0,0):158,(0,1):14,(1,0):18,(1,1):11	0:22,1:21	11
A3SS	19:21826547:21826767:-@19:21825669|21825804:21825580:-	NA	0.71	0.43	0.92	0.28	0.06	0.59	0.43	4.99	('19:21826547:21826767:-@19:21825669|21825804:21825580:-.A.coreAndExt_19:21826547:21826767:-@19:21825669|21825804:21825580:-.A.up', '19:21826547:21826767:-@19:21825669|21825804:21825580:-.B.core_19:21826547:21826767:-@19:21825669|21825804:21825580:-.B.up')	(0,0):83,(1,0):7,(1,1):4	1904-01-01 00:11:00	(0,0):48,(0,1):1,(1,0):3,(1,1):6	0:5,1:5	19
A3SS	17:40493782:40494003:-@17:40467893|40467896:40467668:-	ENSG00000172992	0.14	0.04	0.33	0.57	0.22	0.86	-0.43	4.97	('17:40493782:40494003:-@17:40467893|40467896:40467668:-.A.coreAndExt_17:40493782:40494003:-@17:40467893|40467896:40467668:-.A.up', '17:40493782:40494003:-@17:40467893|40467896:40467668:-.B.core_17:40493782:40494003:-@17:40467893|40467896:40467668:-.B.up')	(0,0):498,(0,1):12,(1,0):1,(1,1):25	0:11,1:27	(0,0):322,(0,1):2,(1,0):2,(1,1):21	0:12,1:13	17
A3SS	4:110838905:110838947:-@4:110838371|110838373:110838227:-	ENSG00000138794	0.9	0.67	0.99	0.45	0.03	0.83	0.45	4.73	('4:110838905:110838947:-@4:110838371|110838373:110838227:-.A.coreAndExt_4:110838905:110838947:-@4:110838371|110838373:110838227:-.A.up', '4:110838905:110838947:-@4:110838371|110838373:110838227:-.B.core_4:110838905:110838947:-@4:110838371|110838373:110838227:-.B.up')	(0,0):66,(1,0):12,(1,1):8	1904-01-01 00:20:00	(0,0):33,(1,1):5	0:1,1:4	4
A3SS	6:36285542:36285670:+@6:36285956|36285971:36286283:+	ENSG00000096070	0.49	0.23	0.73	0.12	0	0.38	0.37	4.61	('6:36285542:36285670:+@6:36285956|36285971:36286283:+.A.up_6:36285542:36285670:+@6:36285956|36285971:36286283:+.A.coreAndExt', '6:36285542:36285670:+@6:36285956|36285971:36286283:+.B.up_6:36285542:36285670:+@6:36285956|36285971:36286283:+.B.core')	(0,0):19,(0,1):4,(1,0):5,(1,1):17	0:11,1:15	(0,0):16,(0,1):9,(1,1):14	0:0,1:23	6
A3SS	4:128825014:128825091:+@4:128826047|128828283:128828472:+	ENSG00000164066	0.12	0.06	0.27	0.58	0.23	0.93	-0.46	4.49	('4:128825014:128825091:+@4:128826047|128828283:128828472:+.A.up_4:128825014:128825091:+@4:128826047|128828283:128828472:+.A.coreAndExt', '4:128825014:128825091:+@4:128826047|128828283:128828472:+.B.up_4:128825014:128825091:+@4:128826047|128828283:128828472:+.B.core')	(0,0):18,(0,1):2,(1,0):62,(1,1):7	0:63,1:8	(0,0):18,(1,0):43,(1,1):1	0:43,1:1	4
A3SS	X:154884189:154884367:+@X:154885741|154885765:154885878:+	ENSG00000124334	0.65	0.48	0.82	0.31	0.12	0.67	0.34	4.45	('X:154884189:154884367:+@X:154885741|154885765:154885878:+.A.up_X:154884189:154884367:+@X:154885741|154885765:154885878:+.A.coreAndExt', 'X:154884189:154884367:+@X:154885741|154885765:154885878:+.B.up_X:154884189:154884367:+@X:154885741|154885765:154885878:+.B.core')	(0,0):216,(0,1):7,(1,0):20,(1,1):6	0:22,1:11	(0,0):56,(0,1):6,(1,0):3,(1,1):3	0:4,1:8	X
A3SS	12:131656585:131656900:+@12:131656994|131656997:131657199:+	ENSG00000112787	0.91	0.7	0.99	0.44	0.16	0.75	0.47	4.35	('12:131656585:131656900:+@12:131656994|131656997:131657199:+.A.up_12:131656585:131656900:+@12:131656994|131656997:131657199:+.A.coreAndExt', '12:131656585:131656900:+@12:131656994|131656997:131657199:+.B.up_12:131656585:131656900:+@12:131656994|131656997:131657199:+.B.core')	(0,0):25,(1,0):8,(1,1):16	1904-01-01 00:24:00	(0,0):19,(0,1):3,(1,0):2,(1,1):7	0:3,1:9	12
A3SS	17:70280630:70280773:-@17:70279851|70280011:70279694:-	ENSG00000109065	0.83	0.59	0.99	0.43	0.26	0.68	0.4	4.22	('17:70280630:70280773:-@17:70279851|70280011:70279694:-.A.coreAndExt_17:70280630:70280773:-@17:70279851|70280011:70279694:-.A.up', '17:70280630:70280773:-@17:70279851|70280011:70279694:-.B.core_17:70280630:70280773:-@17:70279851|70280011:70279694:-.B.up')	(0,0):329,(1,0):57,(1,1):27	0:79,1:5	(0,0):234,(1,0):29,(1,1):32	0:43,1:18	17
A3SS	15:62895826:62896017:-@15:62895200|62895609:62894884:-	ENSG00000140451	0.45	0.33	0.6	0.76	0.57	0.93	-0.31	4.16	('15:62895826:62896017:-@15:62895200|62895609:62894884:-.A.coreAndExt_15:62895826:62896017:-@15:62895200|62895609:62894884:-.A.up', '15:62895826:62896017:-@15:62895200|62895609:62894884:-.B.core_15:62895826:62896017:-@15:62895200|62895609:62894884:-.B.up')	(0,0):55,(0,1):3,(1,0):91,(1,1):81	0:122,1:53	(0,0):21,(0,1):1,(1,0):84,(1,1):41	0:112,1:14	15
A3SS	19:58286702:58286785:-@19:58286594|58286618:58286478:-	ENSG00000170949	0.65	0.28	0.92	0.18	0.01	0.45	0.47	4	('19:58286702:58286785:-@19:58286594|58286618:58286478:-.A.coreAndExt_19:58286702:58286785:-@19:58286594|58286618:58286478:-.A.up', '19:58286702:58286785:-@19:58286594|58286618:58286478:-.B.core_19:58286702:58286785:-@19:58286594|58286618:58286478:-.B.up')	(0,0):43,(1,0):2,(1,1):2	0:3,1:1	(0,0):40,(0,1):4	0:0,1:4	19
A3SS	11:36255215:36255249:-@11:36254366|36254381:36254263:-	ENSG00000110442	0.19	0.01	0.59	0.66	0.2	0.97	-0.47	3.97	('11:36255215:36255249:-@11:36254366|36254381:36254263:-.A.coreAndExt_11:36255215:36255249:-@11:36254366|36254381:36254263:-.A.up', '11:36255215:36255249:-@11:36254366|36254381:36254263:-.B.core_11:36255215:36255249:-@11:36254366|36254381:36254263:-.B.up')	(0,0):33,(0,1):2	0:0,1:2	(0,0):61,(1,0):1	1904-01-01 00:01:00	11
A3SS	10:99203546:99204546:+@10:99205386|99205407:99205530:+	ENSG00000171307	0.15	0.01	0.48	0.61	0.27	0.94	-0.46	3.93	('10:99203546:99204546:+@10:99205386|99205407:99205530:+.A.up_10:99203546:99204546:+@10:99205386|99205407:99205530:+.A.coreAndExt', '10:99203546:99204546:+@10:99205386|99205407:99205530:+.B.up_10:99203546:99204546:+@10:99205386|99205407:99205530:+.B.core')	(0,0):71,(0,1):4,(1,1):25	0:5,1:24	(0,0):67,(1,0):2,(1,1):19	0:12,1:9	10
A3SS	10:105148163:105148275:+@10:105149394|105149481:105149577:+	ENSG00000148843	0.64	0.25	0.94	0.17	0.01	0.8	0.47	3.84	('10:105148163:105148275:+@10:105149394|105149481:105149577:+.A.up_10:105148163:105148275:+@10:105149394|105149481:105149577:+.A.coreAndExt', '10:105148163:105148275:+@10:105149394|105149481:105149577:+.B.up_10:105148163:105148275:+@10:105149394|105149481:105149577:+.B.core')	(0,0):105,(1,0):3,(1,1):2	1904-01-01 00:05:00	(0,0):113,(0,1):1,(1,1):2	0:0,1:3	10
A3SS	6:71290391:71290545:+@6:71290767|71291355:71293122:+	ENSG00000082269	0.48	0.39	0.57	0.26	0.15	0.4	0.22	3.54	('6:71290391:71290545:+@6:71290767|71291355:71293122:+.A.up_6:71290391:71290545:+@6:71290767|71291355:71293122:+.A.coreAndExt', '6:71290391:71290545:+@6:71290767|71291355:71293122:+.B.up_6:71290391:71290545:+@6:71290767|71291355:71293122:+.B.core')	(0,0):91,(0,1):15,(1,0):98,(1,1):447	0:310,1:250	(0,0):28,(0,1):3,(1,0):14,(1,1):144	0:48,1:113	6
A3SS	13:50399544:50399615:+@13:50401598|50401612:50401719:+	ENSG00000136104	0.19	0.08	0.38	0.54	0.25	0.79	-0.35	3.47	('13:50399544:50399615:+@13:50401598|50401612:50401719:+.A.up_13:50399544:50399615:+@13:50401598|50401612:50401719:+.A.coreAndExt', '13:50399544:50399615:+@13:50401598|50401612:50401719:+.B.up_13:50399544:50399615:+@13:50401598|50401612:50401719:+.B.core')	(0,0):236,(0,1):16,(1,0):4	0:4,1:16	(0,0):154,(0,1):3,(1,0):4	0:4,1:3	13
A3SS	11:119701045:119701287:+@11:119703041|119703385:119703559:+	ENSG00000181264	0.86	0.62	0.98	0.39	0.18	0.72	0.47	3.46	('11:119701045:119701287:+@11:119703041|119703385:119703559:+.A.up_11:119701045:119701287:+@11:119703041|119703385:119703559:+.A.coreAndExt', '11:119701045:119701287:+@11:119703041|119703385:119703559:+.B.up_11:119701045:119701287:+@11:119703041|119703385:119703559:+.B.core')	(0,0):104,(1,0):31,(1,1):5	1904-01-01 00:36:00	(0,0):104,(0,1):3,(1,0):10,(1,1):4	0:11,1:6	11
A3SS	3:52598126:52598311:-@3:52596491|52596566:52596409:-	ENSG00000163939	0.63	0.46	0.81	0.86	0.68	0.98	-0.23	3.3	('3:52598126:52598311:-@3:52596491|52596566:52596409:-.A.coreAndExt_3:52598126:52598311:-@3:52596491|52596566:52596409:-.A.up', '3:52598126:52598311:-@3:52596491|52596566:52596409:-.B.core_3:52598126:52598311:-@3:52596491|52596566:52596409:-.B.up')	(0,0):183,(0,1):6,(1,0):36,(1,1):23	0:49,1:16	(0,0):89,(0,1):1,(1,0):35,(1,1):9	0:42,1:3	3
A3SS	1:11962825:11963128:+@1:11964454|11964614:11964758:+	ENSG00000116688	0.3	0.19	0.45	0.53	0.38	0.68	-0.23	3.28	('1:11962825:11963128:+@1:11964454|11964614:11964758:+.A.up_1:11962825:11963128:+@1:11964454|11964614:11964758:+.A.coreAndExt', '1:11962825:11963128:+@1:11964454|11964614:11964758:+.B.up_1:11962825:11963128:+@1:11964454|11964614:11964758:+.B.core')	(0,0):178,(0,1):13,(1,0):19,(1,1):22	0:25,1:29	(0,0):228,(0,1):12,(1,0):41,(1,1):22	0:52,1:23	1
A3SS	5:157092454:157092630:+@5:157094166|157094257:157094331:+	ENSG00000113272	0.41	0.22	0.67	0.76	0.49	0.96	-0.35	3.28	('5:157092454:157092630:+@5:157094166|157094257:157094331:+.A.up_5:157092454:157092630:+@5:157094166|157094257:157094331:+.A.coreAndExt', '5:157092454:157092630:+@5:157094166|157094257:157094331:+.B.up_5:157092454:157092630:+@5:157094166|157094257:157094331:+.B.core')	(0,0):253,(0,1):3,(1,0):19,(1,1):25	0:26,1:21	(0,0):348,(1,0):33,(1,1):25	0:47,1:11	5
A3SS	15:22878829:22878945:+@15:22879607|22879636:22879767:+	ENSG00000207263,ENSG00000224078	0.36	0.21	0.54	0.09	0.01	0.27	0.27	3.26	('15:22878829:22878945:+@15:22879607|22879636:22879767:+.A.up_15:22878829:22878945:+@15:22879607|22879636:22879767:+.A.coreAndExt', '15:22878829:22878945:+@15:22879607|22879636:22879767:+.B.up_15:22878829:22878945:+@15:22879607|22879636:22879767:+.B.core')	(0,0):181,(0,1):15,(1,0):12,(1,1):6	0:15,1:18	(0,0):86,(0,1):8,(1,1):3	0:1,1:10	15
A3SS	20:1386845:1386919:-@20:1384364|1384515:1384359:-	ENSG00000088833,ENSG00000258950	0.26	0.01	0.84	0.62	0.2	0.92	-0.36	3.25	('20:1386845:1386919:-@20:1384364|1384515:1384359:-.A.coreAndExt_20:1386845:1386919:-@20:1384364|1384515:1384359:-.A.up', '20:1386845:1386919:-@20:1384364|1384515:1384359:-.B.core_20:1386845:1386919:-@20:1384364|1384515:1384359:-.B.up')	(0,0):179,(1,0):1	1904-01-01 00:01:00	(0,0):141,(1,0):1	1904-01-01 00:01:00	20
A3SS	17:45139326:45140313:-@17:45138257|45138670:45138227:-	ENSG00000121073	0.88	0.73	0.97	0.58	0.4	0.81	0.3	3.24	('17:45139326:45140313:-@17:45138257|45138670:45138227:-.A.coreAndExt_17:45139326:45140313:-@17:45138257|45138670:45138227:-.A.up', '17:45139326:45140313:-@17:45138257|45138670:45138227:-.B.core_17:45139326:45140313:-@17:45138257|45138670:45138227:-.B.up')	(0,0):429,(1,0):68,(1,1):110	0:156,1:22	(0,0):400,(1,0):35,(1,1):103	0:98,1:40	17
A3SS	17:77579778:77579848:+@17:77580184|77580258:77580350:+	ENSG00000169683	0.26	0	0.89	0.67	0.04	0.94	-0.41	3.24	('17:77579778:77579848:+@17:77580184|77580258:77580350:+.A.up_17:77579778:77579848:+@17:77580184|77580258:77580350:+.A.coreAndExt', '17:77579778:77579848:+@17:77580184|77580258:77580350:+.B.up_17:77579778:77579848:+@17:77580184|77580258:77580350:+.B.core')	(0,0):33,(0,1):1	0:0,1:1	(0,0):22,(1,0):1	1904-01-01 00:01:00	17
A3SS	17:77260971:77261169:-@17:77259584|77260561:77259469:-	ENSG00000214087	0.5	0.33	0.74	0.84	0.56	1	-0.34	3.22	('17:77260971:77261169:-@17:77259584|77260561:77259469:-.A.coreAndExt_17:77260971:77261169:-@17:77259584|77260561:77259469:-.A.up', '17:77260971:77261169:-@17:77259584|77260561:77259469:-.B.core_17:77260971:77261169:-@17:77259584|77260561:77259469:-.B.up')	(0,0):233,(0,1):3,(1,0):113,(1,1):6	0:115,1:7	(0,0):232,(1,0):134,(1,1):7	0.0979167	17
A3SS	17:50395666:50395791:-@17:50393672|50395275:50393479:-	ENSG00000166260	0.92	0.81	0.99	0.71	0.57	0.84	0.21	3.17	('17:50395666:50395791:-@17:50393672|50395275:50393479:-.A.coreAndExt_17:50395666:50395791:-@17:50393672|50395275:50393479:-.A.up', '17:50395666:50395791:-@17:50393672|50395275:50393479:-.B.core_17:50395666:50395791:-@17:50393672|50395275:50393479:-.B.up')	(0,0):203,(0,1):2,(1,0):1058,(1,1):9	0:1067,1:2	(0,0):135,(0,1):8,(1,0):803,(1,1):8	0:805,1:14	17
A3SS	2:71070387:71070454:-@2:71069655|71069671:71069553:-	ENSG00000144043,ENSG00000258881	0.24	0.03	0.68	0.68	0.3	0.99	-0.44	3.17	('2:71070387:71070454:-@2:71069655|71069671:71069553:-.A.coreAndExt_2:71070387:71070454:-@2:71069655|71069671:71069553:-.A.up', '2:71070387:71070454:-@2:71069655|71069671:71069553:-.B.core_2:71070387:71070454:-@2:71069655|71069671:71069553:-.B.up')	(0,0):79,(0,1):2	0:0,1:2	(0,0):70,(1,0):1	1904-01-01 00:01:00	2
A3SS	5:138841979:138842101:-@5:138841111|138841473:138840928:-	ENSG00000184584	0.79	0.65	0.95	0.47	0.27	0.81	0.32	3.16	('5:138841979:138842101:-@5:138841111|138841473:138840928:-.A.coreAndExt_5:138841979:138842101:-@5:138841111|138841473:138840928:-.A.up', '5:138841979:138842101:-@5:138841111|138841473:138840928:-.B.core_5:138841979:138842101:-@5:138841111|138841473:138840928:-.B.up')	(0,0):505,(0,1):1,(1,0):450,(1,1):84	0:521,1:14	(0,0):79,(0,1):1,(1,0):45,(1,1):15	0:50,1:11	5
A3SS	5:140001075:140001549:+@5:140002260|140002355:140002440:+	ENSG00000113119	0.55	0.26	0.93	0.15	0.01	0.66	0.4	3.14	('5:140001075:140001549:+@5:140002260|140002355:140002440:+.A.up_5:140001075:140001549:+@5:140002260|140002355:140002440:+.A.coreAndExt', '5:140001075:140001549:+@5:140002260|140002355:140002440:+.B.up_5:140001075:140001549:+@5:140002260|140002355:140002440:+.B.core')	(0,0):257,(1,0):5,(1,1):24	0:15,1:14	(0,0):163,(1,1):21	0:0,1:21	5
A3SS	6:157994545:157994647:+@6:158013744|158013789:158014549:+	ENSG00000175048	0.23	0.04	0.54	0.62	0.36	0.84	-0.39	3.14	('6:157994545:157994647:+@6:158013744|158013789:158014549:+.A.up_6:157994545:157994647:+@6:158013744|158013789:158014549:+.A.coreAndExt', '6:157994545:157994647:+@6:158013744|158013789:158014549:+.B.up_6:157994545:157994647:+@6:158013744|158013789:158014549:+.B.core')	(0,0):269,(0,1):1,(1,0):2,(1,1):115	0:8,1:110	(0,0):195,(0,1):2,(1,0):9,(1,1):97	0:48,1:60	6
A3SS	11:63748333:63748765:-@11:63748258|63748261:63748148:-	ENSG00000149743	0.18	0.03	0.45	0.55	0.23	0.87	-0.37	3.06	('11:63748333:63748765:-@11:63748258|63748261:63748148:-.A.coreAndExt_11:63748333:63748765:-@11:63748258|63748261:63748148:-.A.up', '11:63748333:63748765:-@11:63748258|63748261:63748148:-.B.core_11:63748333:63748765:-@11:63748258|63748261:63748148:-.B.up')	(0,0):111,(0,1):7,(1,0):1,(1,1):29	0:3,1:34	(0,0):56,(0,1):2,(1,0):2,(1,1):13	0:4,1:13	11
A3SS	2:96666385:96667106:-@2:96660946|96661007:96660776:-	ENSG00000114982	0.45	0.35	0.55	0.65	0.52	0.77	-0.2	3.05	('2:96666385:96667106:-@2:96660946|96661007:96660776:-.A.coreAndExt_2:96666385:96667106:-@2:96660946|96661007:96660776:-.A.up', '2:96666385:96667106:-@2:96660946|96661007:96660776:-.B.core_2:96666385:96667106:-@2:96660946|96661007:96660776:-.B.up')	(0,0):583,(0,1):47,(1,0):51,(1,1):133	0:100,1:131	(0,0):299,(0,1):15,(1,0):37,(1,1):89	0:91,1:50	2
A3SS	9:19092522:19093115:-@9:19086705|19086767:19086672:-	ENSG00000147874	0.91	0.76	1	0.6	0.35	0.83	0.31	3.03	('9:19092522:19093115:-@9:19086705|19086767:19086672:-.A.coreAndExt_9:19092522:19093115:-@9:19086705|19086767:19086672:-.A.up', '9:19092522:19093115:-@9:19086705|19086767:19086672:-.B.core_9:19092522:19093115:-@9:19086705|19086767:19086672:-.B.up')	(0,0):403,(1,0):46,(1,1):188	0:222,1:12	(0,0):214,(1,0):20,(1,1):154	0:75,1:99	9
A3SS	1:247118953:247119747:-@1:247118681|247118839:247118650:-	ENSG00000171163	0.18	0.01	0.41	0.52	0.24	0.83	-0.34	3	('1:247118953:247119747:-@1:247118681|247118839:247118650:-.A.coreAndExt_1:247118953:247119747:-@1:247118681|247118839:247118650:-.A.up', '1:247118953:247119747:-@1:247118681|247118839:247118650:-.B.core_1:247118953:247119747:-@1:247118681|247118839:247118650:-.B.up')	(0,0):101,(0,1):2,(1,0):2,(1,1):47	0:9,1:42	(0,0):59,(0,1):1,(1,0):6,(1,1):28	0:15,1:20	1
A3SS	19:63449479:63449605:+@19:63449889|63449924:63449972:+	ENSG00000198131	0.88	0.71	0.98	0.59	0.4	0.81	0.29	3	('19:63449479:63449605:+@19:63449889|63449924:63449972:+.A.up_19:63449479:63449605:+@19:63449889|63449924:63449972:+.A.coreAndExt', '19:63449479:63449605:+@19:63449889|63449924:63449972:+.B.up_19:63449479:63449605:+@19:63449889|63449924:63449972:+.B.core')	(0,0):250,(0,1):1,(1,0):31,(1,1):4	0:35,1:1	(0,0):168,(0,1):7,(1,0):23,(1,1):3	0:25,1:8	19
A3SS	20:4930052:4930154:-@20:4899561|4899565:4899439:-	ENSG00000089057	0.76	0.46	0.92	0.34	0.09	0.68	0.42	3	('20:4930052:4930154:-@20:4899561|4899565:4899439:-.A.coreAndExt_20:4930052:4930154:-@20:4899561|4899565:4899439:-.A.up', '20:4930052:4930154:-@20:4899561|4899565:4899439:-.B.core_20:4930052:4930154:-@20:4899561|4899565:4899439:-.B.up')	(0,0):120,(0,1):2,(1,0):9,(1,1):1	0:10,1:2	(0,0):178,(0,1):2,(1,0):1	0:1,1:2	20
A3SS	19:21826547:21826767:-@19:21825652|21825804:21825580:-	NA	0.76	0.36	0.97	0.36	0.1	0.81	0.4	2.99	('19:21826547:21826767:-@19:21825652|21825804:21825580:-.A.coreAndExt_19:21826547:21826767:-@19:21825652|21825804:21825580:-.A.up', '19:21826547:21826767:-@19:21825652|21825804:21825580:-.B.core_19:21826547:21826767:-@19:21825652|21825804:21825580:-.B.up')	(0,0):83,(1,0):7,(1,1):4	0:9,1:2	(0,0):49,(1,0):3,(1,1):6	0:5,1:4	19
A3SS	X:153393375:153393398:-@X:153390122|153390170:153389999:-	ENSG00000071889	0.15	0.04	0.35	0.62	0.2	0.97	-0.47	2.99	('X:153393375:153393398:-@X:153390122|153390170:153389999:-.A.coreAndExt_X:153393375:153393398:-@X:153390122|153390170:153389999:-.A.up', 'X:153393375:153393398:-@X:153390122|153390170:153389999:-.B.core_X:153393375:153393398:-@X:153390122|153390170:153389999:-.B.up')	(0,0):118,(0,1):4,(1,0):3,(1,1):4	0:4,1:7	(0,0):75,(1,0):3,(1,1):3	1904-01-01 00:06:00	X
A3SS	X:78509258:78509748:-@X:78505622|78505704:78505576:-	ENSG00000078596	0.55	0.27	0.93	0.18	0.06	0.41	0.37	2.97	('X:78509258:78509748:-@X:78505622|78505704:78505576:-.A.coreAndExt_X:78509258:78509748:-@X:78505622|78505704:78505576:-.A.up', 'X:78509258:78509748:-@X:78505622|78505704:78505576:-.B.core_X:78509258:78509748:-@X:78505622|78505704:78505576:-.B.up')	(0,0):101,(1,0):7,(1,1):40	0:23,1:24	(0,0):106,(1,0):3,(1,1):55	0:13,1:45	X
A3SS	3:58394535:58394621:-@3:58392751|58394451:58392644:-	ENSG00000168291	0.63	0.23	0.97	0.2	0.03	0.56	0.43	2.94	('3:58394535:58394621:-@3:58392751|58394451:58392644:-.A.coreAndExt_3:58394535:58394621:-@3:58392751|58394451:58392644:-.A.up', '3:58394535:58394621:-@3:58392751|58394451:58392644:-.B.core_3:58394535:58394621:-@3:58392751|58394451:58392644:-.B.up')	(0,0):432,(1,0):27	1904-01-01 00:27:00	(0,0):546,(1,0):40,(1,1):3	0:40,1:3	3
A3SS	3:187987250:187987747:+@3:187987891|187987962:187988067:+	ENSG00000156976,ENSG00000200320,ENSG00000221420	0.5	0.37	0.64	0.3	0.21	0.41	0.2	2.93	('3:187987250:187987747:+@3:187987891|187987962:187988067:+.A.up_3:187987250:187987747:+@3:187987891|187987962:187988067:+.A.coreAndExt', '3:187987250:187987747:+@3:187987891|187987962:187988067:+.B.up_3:187987250:187987747:+@3:187987891|187987962:187988067:+.B.core')	(0,0):11087,(0,1):11,(1,0):38,(1,1):168	0:119,1:98	(0,0):8057,(0,1):17,(1,0):31,(1,1):278	0:81,1:245	3
A3SS	5:176852012:176852042:-@5:176851532|176851583:176851414:-	ENSG00000196923	0.11	0.02	0.24	0.62	0.16	0.97	-0.51	2.92	('5:176852012:176852042:-@5:176851532|176851583:176851414:-.A.coreAndExt_5:176852012:176852042:-@5:176851532|176851583:176851414:-.A.up', '5:176852012:176852042:-@5:176851532|176851583:176851414:-.B.core_5:176852012:176852042:-@5:176851532|176851583:176851414:-.B.up')	(0,0):120,(0,1):6,(1,0):2,(1,1):5	0:2,1:11	(0,0):41,(1,0):2,(1,1):1	0:2,1:1	5
A3SS	2:74634722:74635449:+@2:74635789|74635791:74636088:+	ENSG00000115325	0.94	0.85	0.99	0.71	0.46	0.89	0.23	2.91	('2:74634722:74635449:+@2:74635789|74635791:74636088:+.A.up_2:74634722:74635449:+@2:74635789|74635791:74636088:+.A.coreAndExt', '2:74634722:74635449:+@2:74635789|74635791:74636088:+.B.up_2:74634722:74635449:+@2:74635789|74635791:74636088:+.B.core')	(0,0):124,(0,1):1,(1,0):33,(1,1):81	0:107,1:8	(0,0):52,(0,1):4,(1,0):12,(1,1):27	0:28,1:15	2
A3SS	7:98471074:98471275:-@7:98468671|98468680:98468596:-	ENSG00000198742	0.21	0	0.57	0.64	0.28	0.94	-0.43	2.9	('7:98471074:98471275:-@7:98468671|98468680:98468596:-.A.coreAndExt_7:98471074:98471275:-@7:98468671|98468680:98468596:-.A.up', '7:98471074:98471275:-@7:98468671|98468680:98468596:-.B.core_7:98471074:98471275:-@7:98468671|98468680:98468596:-.B.up')	(0,0):52,(0,1):3,(1,1):6	0:3,1:6	(0,0):34,(1,0):3,(1,1):6	0:7,1:2	7
A3SS	2:48531651:48531719:+@2:48535199|48535238:48535384:+	ENSG00000162869	0.16	0.02	0.43	0.66	0.17	0.98	-0.5	2.87	('2:48531651:48531719:+@2:48535199|48535238:48535384:+.A.up_2:48531651:48531719:+@2:48535199|48535238:48535384:+.A.coreAndExt', '2:48531651:48531719:+@2:48535199|48535238:48535384:+.B.up_2:48531651:48531719:+@2:48535199|48535238:48535384:+.B.core')	(0,0):60,(0,1):5	0:0,1:5	(0,0):34,(1,0):1	1904-01-01 00:01:00	2
A3SS	11:124477743:124477915:-@11:124477423|124477457:124477238:-	ENSG00000150433	0.71	0.37	0.95	0.29	0.07	0.7	0.42	2.8	('11:124477743:124477915:-@11:124477423|124477457:124477238:-.A.coreAndExt_11:124477743:124477915:-@11:124477423|124477457:124477238:-.A.up', '11:124477743:124477915:-@11:124477423|124477457:124477238:-.B.core_11:124477743:124477915:-@11:124477423|124477457:124477238:-.B.up')	(0,0):82,(0,1):1,(1,0):4,(1,1):3	0:7,1:1	(0,0):79,(0,1):2,(1,0):1,(1,1):7	0:5,1:5	11
A3SS	11:47356436:47356703:-@11:47353856|47353859:47353760:-	ENSG00000066336	0.38	0.26	0.51	0.13	0.03	0.33	0.25	2.79	('11:47356436:47356703:-@11:47353856|47353859:47353760:-.A.coreAndExt_11:47356436:47356703:-@11:47353856|47353859:47353760:-.A.up', '11:47356436:47356703:-@11:47353856|47353859:47353760:-.B.core_11:47356436:47356703:-@11:47353856|47353859:47353760:-.B.up')	(0,0):164,(0,1):38,(1,0):24,(1,1):86	0:56,1:92	(0,0):65,(0,1):11,(1,0):1,(1,1):22	0:3,1:31	11
A3SS	2:96899340:96899542:-@2:96897387|96897390:96897242:-	ENSG00000168758	0.32	0.11	0.64	0.79	0.39	0.97	-0.47	2.79	('2:96899340:96899542:-@2:96897387|96897390:96897242:-.A.coreAndExt_2:96899340:96899542:-@2:96897387|96897390:96897242:-.A.up', '2:96899340:96899542:-@2:96897387|96897390:96897242:-.B.core_2:96899340:96899542:-@2:96897387|96897390:96897242:-.B.up')	(0,0):110,(0,1):3,(1,0):1,(1,1):4	0:1,1:7	(0,0):100,(1,0):4,(1,1):4	0:7,1:1	2
A3SS	15:48665881:48665977:-@15:48662645|48662648:48662578:-	ENSG00000092439	0.26	0.03	0.66	0.66	0.36	0.91	-0.4	2.77	('15:48665881:48665977:-@15:48662645|48662648:48662578:-.A.coreAndExt_15:48665881:48665977:-@15:48662645|48662648:48662578:-.A.up', '15:48665881:48665977:-@15:48662645|48662648:48662578:-.B.core_15:48665881:48665977:-@15:48662645|48662648:48662578:-.B.up')	(0,0):129,(0,1):4,(1,0):1	0:1,1:4	(0,0):119,(0,1):1,(1,0):3	0:3,1:1	15
A3SS	16:4604680:4604928:-@16:4600557|4600658:4600495:-	ENSG00000153443	0.07	0	0.24	0.48	0.16	0.94	-0.41	2.77	('16:4604680:4604928:-@16:4600557|4600658:4600495:-.A.coreAndExt_16:4604680:4604928:-@16:4600557|4600658:4600495:-.A.up', '16:4604680:4604928:-@16:4600557|4600658:4600495:-.B.core_16:4604680:4604928:-@16:4600557|4600658:4600495:-.B.up')	(0,0):388,(0,1):5,(1,1):6	0:1,1:10	(0,0):225,(1,0):3,(1,1):8	1904-01-01 00:11:00	16
A3SS	11:124477840:124478415:-@11:124477423|124477457:124477238:-	ENSG00000150433	0.79	0.4	0.98	0.34	0.08	0.71	0.45	2.76	('11:124477840:124478415:-@11:124477423|124477457:124477238:-.A.coreAndExt_11:124477840:124478415:-@11:124477423|124477457:124477238:-.A.up', '11:124477840:124478415:-@11:124477423|124477457:124477238:-.B.core_11:124477840:124478415:-@11:124477423|124477457:124477238:-.B.up')	(0,0):82,(1,0):4,(1,1):8	1904-01-01 00:12:00	(0,0):84,(0,1):3,(1,0):1,(1,1):4	0:4,1:4	11
A3SS	14:74207218:74207340:-@14:74206582|74206598:74206403:-	ENSG00000119682	0.07	0.01	0.19	0.28	0.12	0.46	-0.21	2.73	('14:74207218:74207340:-@14:74206582|74206598:74206403:-.A.coreAndExt_14:74207218:74207340:-@14:74206582|74206598:74206403:-.A.up', '14:74207218:74207340:-@14:74206582|74206598:74206403:-.B.core_14:74207218:74207340:-@14:74206582|74206598:74206403:-.B.up')	(0,0):91,(0,1):21,(1,0):1,(1,1):25	0:1,1:46	(0,0):84,(0,1):14,(1,0):6,(1,1):11	0:8,1:23	14
A3SS	3:49856978:49857087:-@3:49856365|49856454:49856238:-	ENSG00000183763	0.2	0.03	0.55	0.66	0.32	0.92	-0.46	2.71	('3:49856978:49857087:-@3:49856365|49856454:49856238:-.A.coreAndExt_3:49856978:49857087:-@3:49856365|49856454:49856238:-.A.up', '3:49856978:49857087:-@3:49856365|49856454:49856238:-.B.core_3:49856978:49857087:-@3:49856365|49856454:49856238:-.B.up')	(0,0):98,(0,1):2,(1,0):1,(1,1):4	0:1,1:6	(0,0):49,(0,1):1,(1,0):6	0:6,1:1	3
A3SS	X:48784926:48785138:-@X:48783814|48783860:48783576:-	ENSG00000068323	0.29	0.14	0.46	0.65	0.36	0.89	-0.36	2.71	('X:48784926:48785138:-@X:48783814|48783860:48783576:-.A.coreAndExt_X:48784926:48785138:-@X:48783814|48783860:48783576:-.A.up', 'X:48784926:48785138:-@X:48783814|48783860:48783576:-.B.core_X:48784926:48785138:-@X:48783814|48783860:48783576:-.B.up')	(0,0):117,(0,1):12,(1,0):8,(1,1):35	0:26,1:29	(0,0):58,(0,1):3,(1,0):12,(1,1):22	0:24,1:13	X
A3SS	17:70283356:70283985:-@17:70281673|70281789:70281600:-	ENSG00000109065	0.57	0.22	0.89	0.15	0.01	0.5	0.42	2.7	('17:70283356:70283985:-@17:70281673|70281789:70281600:-.A.coreAndExt_17:70283356:70283985:-@17:70281673|70281789:70281600:-.A.up', '17:70283356:70283985:-@17:70281673|70281789:70281600:-.B.core_17:70283356:70283985:-@17:70281673|70281789:70281600:-.B.up')	(0,0):164,(1,0):5,(1,1):33	0:31,1:7	(0,0):137,(1,1):22	0:8,1:14	17
A3SS	19:17200065:17200118:+@19:17200240|17200612:17201024:+	ENSG00000099330	0.09	0.03	0.19	0.36	0.14	0.68	-0.27	2.68	('19:17200065:17200118:+@19:17200240|17200612:17201024:+.A.up_19:17200065:17200118:+@19:17200240|17200612:17201024:+.A.coreAndExt', '19:17200065:17200118:+@19:17200240|17200612:17201024:+.B.up_19:17200065:17200118:+@19:17200240|17200612:17201024:+.B.core')	(0,0):8,(0,1):3,(1,0):4,(1,1):19	0:5,1:21	(0,0):5,(0,1):1,(1,0):8,(1,1):10	0:10,1:9	19
A3SS	19:63550929:63551022:+@19:63556499|63556557:63556652:+	NA	0.66	0.25	0.93	0.22	0.02	0.62	0.44	2.68	('19:63550929:63551022:+@19:63556499|63556557:63556652:+.A.up_19:63550929:63551022:+@19:63556499|63556557:63556652:+.A.coreAndExt', '19:63550929:63551022:+@19:63556499|63556557:63556652:+.B.up_19:63550929:63551022:+@19:63556499|63556557:63556652:+.B.core')	(0,0):126,(1,0):2	1904-01-01 00:02:00	(0,0):81,(0,1):2	0:0,1:2	19
A3SS	8:22110698:22110878:+@8:22114576|22115266:22115386:+	ENSG00000168487	0.28	0.15	0.52	0.67	0.35	0.92	-0.39	2.68	('8:22110698:22110878:+@8:22114576|22115266:22115386:+.A.up_8:22110698:22110878:+@8:22114576|22115266:22115386:+.A.coreAndExt', '8:22110698:22110878:+@8:22114576|22115266:22115386:+.B.up_8:22110698:22110878:+@8:22114576|22115266:22115386:+.B.core')	(0,0):88,(1,0):56,(1,1):16	0:61,1:11	(0,0):64,(1,0):48,(1,1):5	1904-01-01 00:53:00	8
A3SS	9:99429501:99429715:-@9:99427880|99428100:99427784:-	ENSG00000136925	0.87	0.61	0.99	0.52	0.26	0.85	0.35	2.64	('9:99429501:99429715:-@9:99427880|99428100:99427784:-.A.coreAndExt_9:99429501:99429715:-@9:99427880|99428100:99427784:-.A.up', '9:99429501:99429715:-@9:99427880|99428100:99427784:-.B.core_9:99429501:99429715:-@9:99427880|99428100:99427784:-.B.up')	(0,0):118,(1,0):39,(1,1):10	1904-01-01 00:49:00	(0,0):65,(1,0):26,(1,1):19	0:35,1:10	9
A3SS	5:55006832:55006916:-@5:55004280|55004407:55004148:-	ENSG00000177058	0.49	0.16	0.87	0.17	0.03	0.63	0.32	2.62	('5:55006832:55006916:-@5:55004280|55004407:55004148:-.A.coreAndExt_5:55006832:55006916:-@5:55004280|55004407:55004148:-.A.up', '5:55006832:55006916:-@5:55004280|55004407:55004148:-.B.core_5:55006832:55006916:-@5:55004280|55004407:55004148:-.B.up')	(0,0):62,(1,0):4,(1,1):4	1904-01-01 00:08:00	(0,0):45,(1,0):1,(1,1):5	0:2,1:4	5
A3SS	19:19110235:19110309:-@19:19105019|19105166:19104939:-	ENSG00000064545	0.7	0.27	0.99	0.27	0	0.72	0.43	2.59	('19:19110235:19110309:-@19:19105019|19105166:19104939:-.A.coreAndExt_19:19110235:19110309:-@19:19105019|19105166:19104939:-.A.up', '19:19110235:19110309:-@19:19105019|19105166:19104939:-.B.core_19:19110235:19110309:-@19:19105019|19105166:19104939:-.B.up')	(0,0):381,(1,0):5	1904-01-01 00:05:00	(0,0):357,(0,1):1	0:0,1:1	19
A3SS	X:76835969:76836082:-@X:76831073|76831076:76830967:-	ENSG00000085224	0.84	0.68	0.95	0.52	0.24	0.77	0.32	2.59	('X:76835969:76836082:-@X:76831073|76831076:76830967:-.A.coreAndExt_X:76835969:76836082:-@X:76831073|76831076:76830967:-.A.up', 'X:76835969:76836082:-@X:76831073|76831076:76830967:-.B.core_X:76835969:76836082:-@X:76831073|76831076:76830967:-.B.up')	(0,0):147,(0,1):1,(1,0):12,(1,1):4	0:15,1:2	(0,0):125,(0,1):4,(1,0):4,(1,1):4	0:7,1:5	X
A3SS	6:44301413:44301882:+@6:44302975|44302978:44303057:+	ENSG00000112759	0.23	0.04	0.53	0.63	0.27	0.92	-0.4	2.58	('6:44301413:44301882:+@6:44302975|44302978:44303057:+.A.up_6:44301413:44301882:+@6:44302975|44302978:44303057:+.A.coreAndExt', '6:44301413:44301882:+@6:44302975|44302978:44303057:+.B.up_6:44301413:44301882:+@6:44302975|44302978:44303057:+.B.core')	(0,0):129,(0,1):4,(1,1):15	0:3,1:16	(0,0):135,(0,1):1,(1,0):2,(1,1):9	0:6,1:6	6
A3SS	12:56157206:56157730:-@12:56156701|56157013:56156640:-	ENSG00000123329	0.26	0.05	0.67	0.7	0.3	0.97	-0.44	2.57	('12:56157206:56157730:-@12:56156701|56157013:56156640:-.A.coreAndExt_12:56157206:56157730:-@12:56156701|56157013:56156640:-.A.up', '12:56157206:56157730:-@12:56156701|56157013:56156640:-.B.core_12:56157206:56157730:-@12:56156701|56157013:56156640:-.B.up')	(0,0):63,(1,0):3,(1,1):16	0:6,1:13	(0,0):26,(1,0):5,(1,1):6	0:8,1:3	12
A3SS	12:850692:850775:+@12:857639|857642:857788:+	ENSG00000060237	0.63	0.34	0.89	0.31	0.12	0.58	0.32	2.57	('12:850692:850775:+@12:857639|857642:857788:+.A.up_12:850692:850775:+@12:857639|857642:857788:+.A.coreAndExt', '12:850692:850775:+@12:857639|857642:857788:+.B.up_12:850692:850775:+@12:857639|857642:857788:+.B.core')	(0,0):190,(0,1):3,(1,0):7,(1,1):15	0:14,1:11	(0,0):146,(0,1):7,(1,0):3,(1,1):6	0:5,1:11	12
A3SS	3:134854879:134855092:-@3:134854148|134854163:134853997:-	ENSG00000163781	0.64	0.5	0.78	0.85	0.74	0.93	-0.21	2.57	('3:134854879:134855092:-@3:134854148|134854163:134853997:-.A.coreAndExt_3:134854879:134855092:-@3:134854148|134854163:134853997:-.A.up', '3:134854879:134855092:-@3:134854148|134854163:134853997:-.B.core_3:134854879:134855092:-@3:134854148|134854163:134853997:-.B.up')	(0,0):233,(0,1):12,(1,0):29,(1,1):35	0:49,1:27	(0,0):203,(0,1):6,(1,0):48,(1,1):42	0:81,1:15	3
A3SS	7:91713040:91713171:-@7:91712744|91712845:91712677:-	ENSG00000001631	0.72	0.32	0.99	0.28	0.05	0.78	0.44	2.57	('7:91713040:91713171:-@7:91712744|91712845:91712677:-.A.coreAndExt_7:91713040:91713171:-@7:91712744|91712845:91712677:-.A.up', '7:91713040:91713171:-@7:91712744|91712845:91712677:-.B.core_7:91713040:91713171:-@7:91712744|91712845:91712677:-.B.up')	(0,0):44,(1,0):7,(1,1):2	0:8,1:1	(0,0):29,(1,0):1,(1,1):4	0:3,1:2	7
A3SS	7:76018673:76018775:+@7:76082743|76082747:76082916:+	ENSG00000205485,ENSG00000243566	0.27	0.04	0.61	0.69	0.26	0.98	-0.42	2.56	('7:76018673:76018775:+@7:76082743|76082747:76082916:+.A.up_7:76018673:76018775:+@7:76082743|76082747:76082916:+.A.coreAndExt', '7:76018673:76018775:+@7:76082743|76082747:76082916:+.B.up_7:76018673:76018775:+@7:76082743|76082747:76082916:+.B.core')	(0,0):2945,(0,1):3,(1,1):2	0:1,1:4	(0,0):2392,(1,0):1	1904-01-01 00:01:00	7
A3SS	1:168106020:168106122:-@1:168104804|168104893:168104693:-	ENSG00000000457	0.38	0.18	0.62	0.13	0.03	0.34	0.25	2.53	('1:168106020:168106122:-@1:168104804|168104893:168104693:-.A.coreAndExt_1:168106020:168106122:-@1:168104804|168104893:168104693:-.A.up', '1:168106020:168106122:-@1:168104804|168104893:168104693:-.B.core_1:168106020:168106122:-@1:168104804|168104893:168104693:-.B.up')	(0,0):66,(0,1):4,(1,0):7,(1,1):1	0:8,1:4	(0,0):44,(0,1):5,(1,0):1	0:1,1:5	1
A3SS	19:57814001:57814127:-@19:57811900|57811940:57811783:-	ENSG00000167766	0.73	0.35	0.98	0.36	0.02	0.87	0.37	2.52	('19:57814001:57814127:-@19:57811900|57811940:57811783:-.A.coreAndExt_19:57814001:57814127:-@19:57811900|57811940:57811783:-.A.up', '19:57814001:57814127:-@19:57811900|57811940:57811783:-.B.core_19:57814001:57814127:-@19:57811900|57811940:57811783:-.B.up')	(0,0):492,(1,0):4,(1,1):5	0:8,1:1	(0,0):246,(1,1):5	0:1,1:4	19
A3SS	2:130631294:130633384:-@2:130630669|130630856:130630628:-	ENSG00000136699	0.24	0.06	0.61	0.63	0.28	0.92	-0.39	2.49	('2:130631294:130633384:-@2:130630669|130630856:130630628:-.A.coreAndExt_2:130631294:130633384:-@2:130630669|130630856:130630628:-.A.up', '2:130631294:130633384:-@2:130630669|130630856:130630628:-.B.core_2:130631294:130633384:-@2:130630669|130630856:130630628:-.B.up')	(0,0):117,(1,0):3,(1,1):149	0:50,1:102	(0,0):142,(1,0):8,(1,1):115	0:114,1:9	2
A3SS	19:59294851:59294883:-@19:59292263|59292384:59291961:-	ENSG00000170909	0.22	0.11	0.35	0.61	0.22	0.94	-0.39	2.48	('19:59294851:59294883:-@19:59292263|59292384:59291961:-.A.coreAndExt_19:59294851:59294883:-@19:59292263|59292384:59291961:-.A.up', '19:59294851:59294883:-@19:59292263|59292384:59291961:-.B.core_19:59294851:59294883:-@19:59292263|59292384:59291961:-.B.up')	(0,0):269,(0,1):2,(1,0):15,(1,1):54	0:29,1:42	(0,0):18,(1,0):1,(1,1):1	1904-01-01 00:02:00	19
A3SS	X:100193462:100193760:-@X:100183855|100183957:100183687:-	ENSG00000188917	0.62	0.36	0.89	0.24	0.03	0.54	0.38	2.46	('X:100193462:100193760:-@X:100183855|100183957:100183687:-.A.coreAndExt_X:100193462:100193760:-@X:100183855|100183957:100183687:-.A.up', 'X:100193462:100193760:-@X:100183855|100183957:100183687:-.B.core_X:100193462:100193760:-@X:100183855|100183957:100183687:-.B.up')	(0,0):160,(1,0):12,(1,1):31	0:33,1:10	(0,0):104,(1,0):2,(1,1):20	0:6,1:16	X
A3SS	17:7171208:7171273:-@17:7170953|7171052:7170754:-	ENSG00000215041,ENSG00000261915	0.84	0.59	0.99	0.53	0.27	0.76	0.31	2.44	('17:7171208:7171273:-@17:7170953|7171052:7170754:-.A.coreAndExt_17:7171208:7171273:-@17:7170953|7171052:7170754:-.A.up', '17:7171208:7171273:-@17:7170953|7171052:7170754:-.B.core_17:7171208:7171273:-@17:7170953|7171052:7170754:-.B.up')	(0,0):26,(1,0):20,(1,1):9	0:27,1:2	(0,0):26,(0,1):1,(1,0):15,(1,1):17	0:21,1:12	17
A3SS	4:89255133:89255234:-@4:89253723|89253729:89253479:-	ENSG00000118777	0.42	0.06	0.89	0.87	0.58	1	-0.45	2.44	('4:89255133:89255234:-@4:89253723|89253729:89253479:-.A.coreAndExt_4:89255133:89255234:-@4:89253723|89253729:89253479:-.A.up', '4:89255133:89255234:-@4:89253723|89253729:89253479:-.B.core_4:89255133:89255234:-@4:89253723|89253729:89253479:-.B.up')	(0,0):20,(0,1):1,(1,0):1,(1,1):14	0:10,1:6	(0,0):44,(1,0):9,(1,1):17	0:24,1:2	4
A3SS	17:15521614:15521760:-@17:15521316|15521319:15521215:-	ENSG00000221926	0.82	0.42	1	0.34	0.02	0.85	0.48	2.43	('17:15521614:15521760:-@17:15521316|15521319:15521215:-.A.coreAndExt_17:15521614:15521760:-@17:15521316|15521319:15521215:-.A.up', '17:15521614:15521760:-@17:15521316|15521319:15521215:-.B.core_17:15521614:15521760:-@17:15521316|15521319:15521215:-.B.up')	(0,0):21,(1,0):4,(1,1):1	1904-01-01 00:05:00	(0,0):26,(0,1):1	0:0,1:1	17
A3SS	1:17203774:17203903:-@1:17203490|17203493:17203414:-	ENSG00000159363	0.8	0.53	0.96	0.35	0.06	0.73	0.45	2.42	('1:17203774:17203903:-@1:17203490|17203493:17203414:-.A.coreAndExt_1:17203774:17203903:-@1:17203490|17203493:17203414:-.A.up', '1:17203774:17203903:-@1:17203490|17203493:17203414:-.B.core_1:17203774:17203903:-@1:17203490|17203493:17203414:-.B.up')	(0,0):50,(0,1):1,(1,0):9,(1,1):3	0:11,1:2	(0,0):31,(0,1):3,(1,0):1,(1,1):2	0:2,1:4	1
A3SS	19:14676712:14676982:+@19:14677903|14678498:14679074:+	ENSG00000160961	0.29	0.19	0.42	0.61	0.34	0.9	-0.32	2.42	('19:14676712:14676982:+@19:14677903|14678498:14679074:+.A.up_19:14676712:14676982:+@19:14677903|14678498:14679074:+.A.coreAndExt', '19:14676712:14676982:+@19:14677903|14678498:14679074:+.B.up_19:14676712:14676982:+@19:14677903|14678498:14679074:+.B.core')	(0,0):68,(0,1):13,(1,0):23,(1,1):35	0:30,1:41	(0,0):28,(0,1):1,(1,0):14,(1,1):16	0:23,1:8	19
A3SS	5:176897480:176897714:-@5:176896093|176896352:176895965:-	ENSG00000146067	0.61	0.43	0.83	0.89	0.64	1	-0.28	2.41	('5:176897480:176897714:-@5:176896093|176896352:176895965:-.A.coreAndExt_5:176897480:176897714:-@5:176896093|176896352:176895965:-.A.up', '5:176897480:176897714:-@5:176896093|176896352:176895965:-.B.core_5:176897480:176897714:-@5:176896093|176896352:176895965:-.B.up')	(0,0):72,(0,1):3,(1,0):54,(1,1):19	0:67,1:9	(0,0):56,(1,0):37,(1,1):8	0:43,1:2	5
A3SS	10:99203546:99204546:+@10:99205407|99205461:99205530:+	ENSG00000171307	0.71	0.35	0.95	0.29	0.06	0.73	0.42	2.4	('10:99203546:99204546:+@10:99205407|99205461:99205530:+.A.up_10:99203546:99204546:+@10:99205407|99205461:99205530:+.A.coreAndExt', '10:99203546:99204546:+@10:99205407|99205461:99205530:+.B.up_10:99203546:99204546:+@10:99205407|99205461:99205530:+.B.core')	(0,0):70,(0,1):1,(1,0):5,(1,1):24	0:28,1:2	(0,0):68,(0,1):1,(1,1):19	0:10,1:10	10
A3SS	4:8499103:8499217:+@4:8502296|8502325:8502515:+	ENSG00000155275	0.52	0.23	0.77	0.84	0.6	0.98	-0.32	2.4	('4:8499103:8499217:+@4:8502296|8502325:8502515:+.A.up_4:8499103:8499217:+@4:8502296|8502325:8502515:+.A.coreAndExt', '4:8499103:8499217:+@4:8502296|8502325:8502515:+.B.up_4:8499103:8499217:+@4:8502296|8502325:8502515:+.B.core')	(0,0):162,(0,1):3,(1,0):6,(1,1):10	0:9,1:10	(0,0):122,(0,1):1,(1,0):15,(1,1):9	0:23,1:2	4
A3SS	12:895771:896247:-@12:893956|893959:893858:-	ENSG00000002016	0.86	0.55	0.99	0.44	0.11	0.86	0.42	2.39	('12:895771:896247:-@12:893956|893959:893858:-.A.coreAndExt_12:895771:896247:-@12:893956|893959:893858:-.A.up', '12:895771:896247:-@12:893956|893959:893858:-.B.core_12:895771:896247:-@12:893956|893959:893858:-.B.up')	(0,0):97,(1,0):5,(1,1):22	0:25,1:2	(0,0):55,(0,1):1,(1,0):1,(1,1):13	0:2,1:13	12
A3SS	8:28960794:28960889:+@8:28962390|28962396:28962484:+	ENSG00000147421	0.84	0.54	0.97	0.52	0.27	0.76	0.32	2.37	('8:28960794:28960889:+@8:28962390|28962396:28962484:+.A.up_8:28960794:28960889:+@8:28962390|28962396:28962484:+.A.coreAndExt', '8:28960794:28960889:+@8:28962390|28962396:28962484:+.B.up_8:28960794:28960889:+@8:28962390|28962396:28962484:+.B.core')	(0,0):174,(1,0):6	1904-01-01 00:06:00	(0,0):156,(0,1):4,(1,0):5	0:5,1:4	8
A3SS	19:9589767:9589870:-@19:9589434|9589444:9589297:-	ENSG00000171469	0.3	0.07	0.57	0.74	0.34	0.97	-0.44	2.36	('19:9589767:9589870:-@19:9589434|9589444:9589297:-.A.coreAndExt_19:9589767:9589870:-@19:9589434|9589444:9589297:-.A.up', '19:9589767:9589870:-@19:9589434|9589444:9589297:-.B.core_19:9589767:9589870:-@19:9589434|9589444:9589297:-.B.up')	(0,0):130,(0,1):5,(1,0):2,(1,1):4	0:3,1:8	(0,0):89,(1,0):2,(1,1):3	1904-01-01 00:05:00	19
A3SS	4:89907727:89907769:-@4:89899075|89899338:89898928:-	ENSG00000138640	0.2	0.03	0.47	0.62	0.19	0.95	-0.42	2.36	('4:89907727:89907769:-@4:89899075|89899338:89898928:-.A.coreAndExt_4:89907727:89907769:-@4:89899075|89899338:89898928:-.A.up', '4:89907727:89907769:-@4:89899075|89899338:89898928:-.B.core_4:89907727:89907769:-@4:89899075|89899338:89898928:-.B.up')	(0,0):96,(0,1):2,(1,0):4,(1,1):1	0:4,1:3	(0,0):158,(1,0):8,(1,1):1	0:8,1:1	4
A3SS	3:58392644:58394451:-@3:58391709|58392560:58391424:-	ENSG00000168291	0.81	0.68	0.92	0.6	0.47	0.74	0.21	2.35	('3:58392644:58394451:-@3:58391709|58392560:58391424:-.A.coreAndExt_3:58392644:58394451:-@3:58391709|58392560:58391424:-.A.up', '3:58392644:58394451:-@3:58391709|58392560:58391424:-.B.core_3:58392644:58394451:-@3:58391709|58392560:58391424:-.B.up')	(0,0):755,(0,1):3,(1,0):114,(1,1):244	0:339,1:22	(0,0):964,(0,1):3,(1,0):101,(1,1):328	0:263,1:169	3
A3SS	1:206128650:206128814:-@1:206127891|206128086:206126506:-	ENSG00000174059	0.19	0.12	0.29	0.48	0.22	0.82	-0.29	2.31	('1:206128650:206128814:-@1:206127891|206128086:206126506:-.A.coreAndExt_1:206128650:206128814:-@1:206127891|206128086:206126506:-.A.up', '1:206128650:206128814:-@1:206127891|206128086:206126506:-.B.core_1:206128650:206128814:-@1:206127891|206128086:206126506:-.B.up')	(0,0):58,(0,1):20,(1,0):15,(1,1):338	0:112,1:261	(0,0):13,(0,1):3,(1,0):8,(1,1):88	0:36,1:63	1
A3SS	1:45572650:45572770:-@1:45571756|45571820:45571672:-	ENSG00000132781	0.88	0.64	0.99	0.52	0.28	0.82	0.36	2.31	('1:45572650:45572770:-@1:45571756|45571820:45571672:-.A.coreAndExt_1:45572650:45572770:-@1:45571756|45571820:45571672:-.A.up', '1:45572650:45572770:-@1:45571756|45571820:45571672:-.B.core_1:45572650:45572770:-@1:45571756|45571820:45571672:-.B.up')	(0,0):121,(1,0):19,(1,1):4	1904-01-01 00:23:00	(0,0):50,(0,1):3,(1,0):9	0:9,1:3	1
A3SS	14:73831604:73831654:-@14:73829704|73829735:73829610:-	ENSG00000258559,ENSG00000119688	0.67	0.26	0.99	0.27	0.06	0.6	0.4	2.31	('14:73831604:73831654:-@14:73829704|73829735:73829610:-.A.coreAndExt_14:73831604:73831654:-@14:73829704|73829735:73829610:-.A.up', '14:73831604:73831654:-@14:73829704|73829735:73829610:-.B.core_14:73831604:73831654:-@14:73829704|73829735:73829610:-.B.up')	(0,0):123,(1,0):2	1904-01-01 00:02:00	(0,0):100,(0,1):1	0:0,1:1	14
A3SS	12:48698566:48698639:-@12:48696765|48696769:48696681:-	ENSG00000161800	0.65	0.12	0.97	0.24	0.03	0.66	0.41	2.3	('12:48698566:48698639:-@12:48696765|48696769:48696681:-.A.coreAndExt_12:48698566:48698639:-@12:48696765|48696769:48696681:-.A.up', '12:48698566:48698639:-@12:48696765|48696769:48696681:-.B.core_12:48698566:48698639:-@12:48696765|48696769:48696681:-.B.up')	(0,0):234,(1,0):2	1904-01-01 00:02:00	(0,0):137,(0,1):2	0:0,1:2	12
A3SS	1:8776:14754:-@1:8229|8242:8131:-	ENSG00000227232	0.21	0.04	0.64	0.59	0.32	0.84	-0.38	2.27	('1:8776:14754:-@1:8229|8242:8131:-.A.coreAndExt_1:8776:14754:-@1:8229|8242:8131:-.A.up', '1:8776:14754:-@1:8229|8242:8131:-.B.core_1:8776:14754:-@1:8229|8242:8131:-.B.up')	(0,0):256,(0,1):1,(1,1):1490	0:71,1:1420	(0,0):224,(0,1):2,(1,0):5,(1,1):1142	0:601,1:548	1
A3SS	16:219279:219478:-@16:217336|218402:217242:-	ENSG00000007392	0.5	0.34	0.69	0.27	0.18	0.38	0.23	2.27	('16:219279:219478:-@16:217336|218402:217242:-.A.coreAndExt_16:219279:219478:-@16:217336|218402:217242:-.A.up', '16:219279:219478:-@16:217336|218402:217242:-.B.core_16:219279:219478:-@16:217336|218402:217242:-.B.up')	(0,0):141,(0,1):4,(1,0):242,(1,1):12	0:246,1:12	(0,0):126,(0,1):7,(1,0):162,(1,1):16	0:167,1:18	16
A3SS	12:6925888:6926163:+@12:6931336|6931407:6931601:+	ENSG00000111679	0.17	0.06	0.34	0.54	0.21	0.91	-0.37	2.26	('12:6925888:6926163:+@12:6931336|6931407:6931601:+.A.up_12:6925888:6926163:+@12:6931336|6931407:6931601:+.A.coreAndExt', '12:6925888:6926163:+@12:6931336|6931407:6931601:+.B.up_12:6925888:6926163:+@12:6931336|6931407:6931601:+.B.core')	(0,0):441,(1,0):3,(1,1):65	0:18,1:50	(0,0):115,(1,0):4,(1,1):20	0:18,1:6	12
A3SS	22:20176283:20176383:-@22:20172670|20172699:20172513:-	ENSG00000183506	0.72	0.35	0.98	0.32	0.01	0.82	0.4	2.26	('22:20176283:20176383:-@22:20172670|20172699:20172513:-.A.coreAndExt_22:20176283:20176383:-@22:20172670|20172699:20172513:-.A.up', '22:20176283:20176383:-@22:20172670|20172699:20172513:-.B.core_22:20176283:20176383:-@22:20172670|20172699:20172513:-.B.up')	(0,0):120,(1,0):3,(1,1):3	0:5,1:1	(0,0):96,(0,1):2	0:0,1:2	22
A3SS	X:153597495:153597798:-@X:153594892|153594895:153594676:-	ENSG00000160219	0.79	0.66	0.89	0.55	0.3	0.76	0.24	2.26	('X:153597495:153597798:-@X:153594892|153594895:153594676:-.A.coreAndExt_X:153597495:153597798:-@X:153594892|153594895:153594676:-.A.up', 'X:153597495:153597798:-@X:153594892|153594895:153594676:-.B.core_X:153597495:153597798:-@X:153594892|153594895:153594676:-.B.up')	(0,0):164,(0,1):9,(1,0):39,(1,1):87	0:103,1:32	(0,0):72,(0,1):6,(1,0):7,(1,1):38	0:32,1:19	X
A3SS	11:119701045:119701287:+@11:119703041|119703360:119703559:+	ENSG00000181264	0.43	0.27	0.58	0.2	0.08	0.38	0.23	2.24	('11:119701045:119701287:+@11:119703041|119703360:119703559:+.A.up_11:119701045:119701287:+@11:119703041|119703360:119703559:+.A.coreAndExt', '11:119701045:119701287:+@11:119703041|119703360:119703559:+.B.up_11:119701045:119701287:+@11:119703041|119703360:119703559:+.B.core')	(0,0):95,(0,1):9,(1,0):29,(1,1):7	0:32,1:13	(0,0):99,(0,1):8,(1,0):8,(1,1):6	0:8,1:14	11
A3SS	2:44442023:44442212:-@2:44440239|44440393:44440140:-	ENSG00000138078	0.8	0.44	0.97	0.42	0.15	0.76	0.38	2.21	('2:44442023:44442212:-@2:44440239|44440393:44440140:-.A.coreAndExt_2:44442023:44442212:-@2:44440239|44440393:44440140:-.A.up', '2:44442023:44442212:-@2:44440239|44440393:44440140:-.B.core_2:44442023:44442212:-@2:44440239|44440393:44440140:-.B.up')	(0,0):105,(1,0):11,(1,1):3	1904-01-01 00:14:00	(0,0):95,(0,1):2,(1,0):5,(1,1):1	0:5,1:3	2
A3SS	22:40010851:40011103:-@22:40007032|40007162:40006883:-	ENSG00000100401	0.6	0.33	0.88	0.26	0.09	0.55	0.34	2.21	('22:40010851:40011103:-@22:40007032|40007162:40006883:-.A.coreAndExt_22:40010851:40011103:-@22:40007032|40007162:40006883:-.A.up', '22:40010851:40011103:-@22:40007032|40007162:40006883:-.B.core_22:40010851:40011103:-@22:40007032|40007162:40006883:-.B.up')	(0,0):315,(0,1):2,(1,0):19,(1,1):23	0:35,1:9	(0,0):188,(0,1):1,(1,0):5,(1,1):21	0:7,1:20	22
A3SS	3:50112419:50112488:+@3:50112969|50115520:50115603:+	ENSG00000003756,ENSG00000004534	0.74	0.27	0.99	0.42	0.13	0.82	0.32	2.21	('3:50112419:50112488:+@3:50112969|50115520:50115603:+.A.up_3:50112419:50112488:+@3:50112969|50115520:50115603:+.A.coreAndExt', '3:50112419:50112488:+@3:50112969|50115520:50115603:+.B.up_3:50112419:50112488:+@3:50112969|50115520:50115603:+.B.core')	(0,0):381,(1,0):639	0.44375	(0,0):207,(0,1):1,(1,0):328	0:328,1:1	3
A3SS	1:1148487:1148600:-@1:1144186|1144248:1144012:-	ENSG00000078808	0.4	0.21	0.63	0.16	0.07	0.27	0.24	2.18	('1:1148487:1148600:-@1:1144186|1144248:1144012:-.A.coreAndExt_1:1148487:1148600:-@1:1144186|1144248:1144012:-.A.up', '1:1148487:1148600:-@1:1144186|1144248:1144012:-.B.core_1:1148487:1148600:-@1:1144186|1144248:1144012:-.B.up')	(0,0):795,(1,0):17,(1,1):54	0:30,1:41	(0,0):692,(1,0):6,(1,1):62	0:11,1:57	1
A3SS	1:6277511:6278151:-@1:6265443|6265535:6265371:-	ENSG00000097021	0.53	0.09	0.91	0.3	0.01	0.9	0.23	2.18	('1:6277511:6278151:-@1:6265443|6265535:6265371:-.A.coreAndExt_1:6277511:6278151:-@1:6265443|6265535:6265371:-.A.up', '1:6277511:6278151:-@1:6265443|6265535:6265371:-.B.core_1:6277511:6278151:-@1:6265443|6265535:6265371:-.B.up')	(0,0):96,(1,0):1,(1,1):2	0:2,1:1	(0,0):96,(1,1):5	0:1,1:4	1
A3SS	12:53653528:53653981:-@12:53647943|53647997:53647894:-	ENSG00000135426	0.21	0.02	0.61	0.65	0.15	0.97	-0.44	2.18	('12:53653528:53653981:-@12:53647943|53647997:53647894:-.A.coreAndExt_12:53653528:53653981:-@12:53647943|53647997:53647894:-.A.up', '12:53653528:53653981:-@12:53647943|53647997:53647894:-.B.core_12:53653528:53653981:-@12:53647943|53647997:53647894:-.B.up')	(0,0):1096,(1,1):20	0:3,1:17	(0,0):548,(1,1):5	0:3,1:2	12
A3SS	14:105796240:105796550:-@14:105246097|105246132:105245741:-	ENSG00000264024,ENSG00000211895,ENSG00000253692,ENSG00000211896,ENSG00000211897,ENSG00000211898,ENSG00000264473,ENSG00000211905,ENSG00000211904,ENSG00000211900,ENSG00000263751,ENSG00000265612,ENSG00000242472,ENSG00000266408,ENSG00000265714,ENSG00000265517,ENSG00000242887,ENSG00000264781,ENSG00000227335,ENSG00000237111,ENSG00000240041,ENSG00000237547,ENSG00000236597,ENSG00000211899,ENSG00000266706…	0.36	0	0.95	0.66	0.24	1	-0.3	2.18	('14:105796240:105796550:-@14:105246097|105246132:105245741:-.A.coreAndExt_14:105796240:105796550:-@14:105246097|105246132:105245741:-.A.up', '14:105796240:105796550:-@14:105246097|105246132:105245741:-.B.core_14:105796240:105796550:-@14:105246097|105246132:105245741:-.B.up')	(0,0):7385,(1,1):1	0:0,1:1	(0,0):7662,(1,1):5	0:4,1:1	14
A3SS	3:115149433:115149727:+@3:115150223|115150331:115150500:+	ENSG00000184307	0.32	0.13	0.53	0.66	0.37	0.91	-0.34	2.18	('3:115149433:115149727:+@3:115150223|115150331:115150500:+.A.up_3:115149433:115149727:+@3:115150223|115150331:115150500:+.A.coreAndExt', '3:115149433:115149727:+@3:115150223|115150331:115150500:+.B.up_3:115149433:115149727:+@3:115150223|115150331:115150500:+.B.core')	(0,0):27,(0,1):4,(1,0):7,(1,1):18	0:15,1:14	(0,0):22,(0,1):2,(1,0):8,(1,1):4	0:10,1:4	3
A3SS	11:65892584:65893579:-@11:65891916|65891933:65891819:-	ENSG00000174669	0.62	0.31	0.9	0.26	0.05	0.58	0.36	2.16	('11:65892584:65893579:-@11:65891916|65891933:65891819:-.A.coreAndExt_11:65892584:65893579:-@11:65891916|65891933:65891819:-.A.up', '11:65892584:65893579:-@11:65891916|65891933:65891819:-.B.core_11:65892584:65893579:-@11:65891916|65891933:65891819:-.B.up')	(0,0):134,(0,1):2,(1,0):5,(1,1):94	0:50,1:51	(0,0):108,(0,1):4,(1,0):1,(1,1):77	0:28,1:54	11
A3SS	12:7154170:7154444:+@12:7154897|7155243:7155478:+	ENSG00000205885	0.86	0.6	0.99	0.43	0.15	0.85	0.43	2.16	('12:7154170:7154444:+@12:7154897|7155243:7155478:+.A.up_12:7154170:7154444:+@12:7154897|7155243:7155478:+.A.coreAndExt', '12:7154170:7154444:+@12:7154897|7155243:7155478:+.B.up_12:7154170:7154444:+@12:7154897|7155243:7155478:+.B.core')	(0,0):15,(1,0):15,(1,1):3	1904-01-01 00:18:00	(0,0):17,(0,1):1,(1,0):3,(1,1):2	0:4,1:2	12
A3SS	2:3583851:3584463:+@2:3584869|3584913:3585194:+	ENSG00000234171	0.81	0.47	0.99	0.5	0.29	0.76	0.31	2.16	('2:3583851:3584463:+@2:3584869|3584913:3585194:+.A.up_2:3583851:3584463:+@2:3584869|3584913:3585194:+.A.coreAndExt', '2:3583851:3584463:+@2:3584869|3584913:3585194:+.B.up_2:3583851:3584463:+@2:3584869|3584913:3585194:+.B.core')	(0,0):22,(1,0):9,(1,1):73	0:73,1:9	(0,0):20,(0,1):4,(1,0):6,(1,1):39	0:30,1:19	2
A3SS	12:122028481:122028591:+@12:122028860|122028942:122029069:+	ENSG00000256028,ENSG00000111325	0.84	0.57	0.99	0.45	0.12	0.82	0.39	2.14	('12:122028481:122028591:+@12:122028860|122028942:122029069:+.A.up_12:122028481:122028591:+@12:122028860|122028942:122029069:+.A.coreAndExt', '12:122028481:122028591:+@12:122028860|122028942:122029069:+.B.up_12:122028481:122028591:+@12:122028860|122028942:122029069:+.B.core')	(0,0):104,(1,0):15,(1,1):6	0:18,1:3	(0,0):49,(0,1):1,(1,0):4,(1,1):5	0:4,1:6	12
A3SS	7:65877649:65877815:+@7:65886094|65886097:65886263:+	ENSG00000154710,ENSG00000243335	0.56	0.35	0.77	0.29	0.14	0.48	0.27	2.12	('7:65877649:65877815:+@7:65886094|65886097:65886263:+.A.up_7:65877649:65877815:+@7:65886094|65886097:65886263:+.A.coreAndExt', '7:65877649:65877815:+@7:65886094|65886097:65886263:+.B.up_7:65877649:65877815:+@7:65886094|65886097:65886263:+.B.core')	(0,0):112,(0,1):8,(1,0):11,(1,1):21	0:25,1:15	(0,0):122,(0,1):16,(1,0):6,(1,1):18	0:12,1:28	7
A3SS	20:35360580:35360696:+@20:35362988|35363025:35363230:+	ENSG00000101363	0.53	0.23	0.87	0.2	0.01	0.56	0.33	2.1	('20:35360580:35360696:+@20:35362988|35363025:35363230:+.A.up_20:35360580:35360696:+@20:35362988|35363025:35363230:+.A.coreAndExt', '20:35360580:35360696:+@20:35362988|35363025:35363230:+.B.up_20:35360580:35360696:+@20:35362988|35363025:35363230:+.B.core')	(0,0):52,(0,1):3,(1,0):6,(1,1):8	0:13,1:4	(0,0):51,(0,1):2,(1,1):7	0:1,1:8	20
A3SS	14:63079250:63079875:-@14:63076160|63076163:63076000:-	ENSG00000154001	0.81	0.61	0.94	0.48	0.18	0.74	0.33	2.09	('14:63079250:63079875:-@14:63076160|63076163:63076000:-.A.coreAndExt_14:63079250:63079875:-@14:63076160|63076163:63076000:-.A.up', '14:63079250:63079875:-@14:63076160|63076163:63076000:-.B.core_14:63079250:63079875:-@14:63076160|63076163:63076000:-.B.up')	(0,0):52,(0,1):2,(1,0):14,(1,1):47	0:49,1:14	(0,0):34,(0,1):3,(1,0):3,(1,1):42	0:22,1:26	14
A3SS	9:13112086:13112169:-@9:13111931|13111953:13111738:-	ENSG00000107186	0.38	0.13	0.66	0.1	0.02	0.24	0.28	2.09	('9:13112086:13112169:-@9:13111931|13111953:13111738:-.A.coreAndExt_9:13112086:13112169:-@9:13111931|13111953:13111738:-.A.up', '9:13112086:13112169:-@9:13111931|13111953:13111738:-.B.core_9:13112086:13112169:-@9:13111931|13111953:13111738:-.B.up')	(0,0):30,(0,1):4,(1,0):3,(1,1):2	0:3,1:6	(0,0):42,(0,1):13,(1,0):1,(1,1):3	0:1,1:16	9
A3SS	22:48986873:48987076:+@22:48989044|48989092:48989272:+	ENSG00000073169	0.54	0.31	0.78	0.24	0.07	0.49	0.3	2.07	('22:48986873:48987076:+@22:48989044|48989092:48989272:+.A.up_22:48986873:48987076:+@22:48989044|48989092:48989272:+.A.coreAndExt', '22:48986873:48987076:+@22:48989044|48989092:48989272:+.B.up_22:48986873:48987076:+@22:48989044|48989092:48989272:+.B.core')	(0,0):146,(0,1):5,(1,0):10,(1,1):12	0:17,1:10	(0,0):129,(0,1):5,(1,0):4,(1,1):32	0:7,1:34	22
A3SS	7:6594773:6596631:+@7:6597859|6597909:6598023:+	ENSG00000146576,ENSG00000136247	0.3	0.08	0.62	0.69	0.32	0.97	-0.39	2.06	('7:6594773:6596631:+@7:6597859|6597909:6598023:+.A.up_7:6594773:6596631:+@7:6597859|6597909:6598023:+.A.coreAndExt', '7:6594773:6596631:+@7:6597859|6597909:6598023:+.B.up_7:6594773:6596631:+@7:6597859|6597909:6598023:+.B.core')	(0,0):91,(1,0):1,(1,1):160	0:58,1:103	(0,0):64,(1,0):4,(1,1):101	0:22,1:83	7
A3SS	1:26972879:26972976:+@1:26973407|26974058:26974298:+	ENSG00000117713	0.79	0.51	0.98	0.47	0.28	0.74	0.32	2.01	('1:26972879:26972976:+@1:26973407|26974058:26974298:+.A.up_1:26972879:26972976:+@1:26973407|26974058:26974298:+.A.coreAndExt', '1:26972879:26972976:+@1:26973407|26974058:26974298:+.B.up_1:26972879:26972976:+@1:26973407|26974058:26974298:+.B.core')	(0,0):65,(1,0):126,(1,1):14	0:136,1:4	(0,0):32,(0,1):1,(1,0):63,(1,1):14	0:71,1:7	1
A3SS	1:71305047:71305822:-@1:71304019|71304023:71303949:-	ENSG00000132485	0.72	0.53	0.88	0.92	0.84	0.98	-0.2	2.01	('1:71305047:71305822:-@1:71304019|71304023:71303949:-.A.coreAndExt_1:71305047:71305822:-@1:71304019|71304023:71303949:-.A.up', '1:71305047:71305822:-@1:71304019|71304023:71303949:-.B.core_1:71305047:71305822:-@1:71304019|71304023:71303949:-.B.up')	(0,0):1965,(0,1):8,(1,0):27,(1,1):754	0:564,1:225	(0,0):1495,(0,1):3,(1,0):47,(1,1):534	0:548,1:36	1
A3SS	7:74878468:74878978:+@7:74880003|74882099:74882237:+	ENSG00000223705	0.56	0.44	0.71	0.83	0.58	0.98	-0.27	2.01	('7:74878468:74878978:+@7:74880003|74882099:74882237:+.A.up_7:74878468:74878978:+@7:74880003|74882099:74882237:+.A.coreAndExt', '7:74878468:74878978:+@7:74880003|74882099:74882237:+.B.up_7:74878468:74878978:+@7:74880003|74882099:74882237:+.B.core')	(0,0):136,(1,0):287,(1,1):77	0:335,1:29	(0,0):62,(1,0):142,(1,1):23	0:153,1:12	7
A5SS	11:3738432:3738345|3738294:-@11:3731122:3731214:-	ENSG00000110713	0.08	0.03	0.16	0.49	0.31	0.7	-0.41	4.61639e+06	('11:3738432:3738345|3738294:-@11:3731122:3731214:-.A.dn_11:3738432:3738345|3738294:-@11:3731122:3731214:-.A.coreAndExt', '11:3738432:3738345|3738294:-@11:3731122:3731214:-.B.dn_11:3738432:3738345|3738294:-@11:3731122:3731214:-.B.core')	(0,0):516,(0,1):31,(1,0):6	0:6,1:31	(0,0):391,(0,1):7,(1,0):17	0:17,1:7	11
A5SS	2:70382239:70382158|70382044:-@2:70381144:70381616:-	ENSG00000035141	0.19	0.07	0.4	0.8	0.48	0.99	-0.61	22920.3	('2:70382239:70382158|70382044:-@2:70381144:70381616:-.A.dn_2:70382239:70382158|70382044:-@2:70381144:70381616:-.A.coreAndExt', '2:70382239:70382158|70382044:-@2:70381144:70381616:-.B.dn_2:70382239:70382158|70382044:-@2:70381144:70381616:-.B.core')	(0,0):201,(0,1):3,(1,0):3,(1,1):25	0:5,1:26	(0,0):162,(1,0):10,(1,1):14	0:18,1:6	2
A5SS	17:3779488:3779371|3779259:-@17:3778283:3778823:-	ENSG00000074370	0.07	0.03	0.14	0.72	0.29	0.99	-0.65	189.32	('17:3779488:3779371|3779259:-@17:3778283:3778823:-.A.dn_17:3779488:3779371|3779259:-@17:3778283:3778823:-.A.coreAndExt', '17:3779488:3779371|3779259:-@17:3778283:3778823:-.B.dn_17:3779488:3779371|3779259:-@17:3778283:3778823:-.B.core')	(0,0):170,(0,1):35,(1,0):4,(1,1):35	0:5,1:69	(0,0):27,(1,0):3,(1,1):7	1904-01-01 00:10:00	17
A5SS	6:79968825:79968753|79968712:-@6:79967364:79968162:-	ENSG00000118418	0.48	0.37	0.58	0.79	0.68	0.87	-0.31	188.85	('6:79968825:79968753|79968712:-@6:79967364:79968162:-.A.dn_6:79968825:79968753|79968712:-@6:79967364:79968162:-.A.coreAndExt', '6:79968825:79968753|79968712:-@6:79967364:79968162:-.B.dn_6:79968825:79968753|79968712:-@6:79967364:79968162:-.B.core')	(0,0):201,(0,1):32,(1,0):40,(1,1):211	0:135,1:148	(0,0):203,(0,1):13,(1,0):73,(1,1):308	0:293,1:101	6
A5SS	12:68480256:68480384|68480379:+@12:68481656:68481768:+	ENSG00000258052,ENSG00000127328	0.87	0.74	0.95	0.36	0.08	0.67	0.51	177.53	('12:68480256:68480384|68480379:+@12:68481656:68481768:+.A.coreAndExt_12:68480256:68480384|68480379:+@12:68481656:68481768:+.A.dn', '12:68480256:68480384|68480379:+@12:68481656:68481768:+.B.core_12:68480256:68480384|68480379:+@12:68481656:68481768:+.B.dn')	(0,0):150,(0,1):2,(1,0):25,(1,1):10	0:34,1:3	(0,0):47,(0,1):4,(1,0):2,(1,1):4	0:3,1:7	12
A5SS	1:153212608:153212457|153212393:-@1:153209132:153209299:-	ENSG00000160691	0.49	0.23	0.8	0.07	0.01	0.2	0.42	166.31	('1:153212608:153212457|153212393:-@1:153209132:153209299:-.A.dn_1:153212608:153212457|153212393:-@1:153209132:153209299:-.A.coreAndExt', '1:153212608:153212457|153212393:-@1:153209132:153209299:-.B.dn_1:153212608:153212457|153212393:-@1:153209132:153209299:-.B.core')	(0,0):633,(1,0):9,(1,1):32	0:16,1:25	(0,0):658,(1,0):1,(1,1):51	0:5,1:47	1
A5SS	5:42842967:42842755|42840515:-@5:42835449:42837190:-	ENSG00000250722	0.1	0.06	0.16	0.67	0.38	0.91	-0.57	82.54	('5:42842967:42842755|42840515:-@5:42835449:42837190:-.A.dn_5:42842967:42842755|42840515:-@5:42835449:42837190:-.A.coreAndExt', '5:42842967:42842755|42840515:-@5:42835449:42837190:-.B.dn_5:42842967:42842755|42840515:-@5:42835449:42837190:-.B.core')	(0,0):117,(0,1):1,(1,0):16,(1,1):119	0:25,1:111	(0,0):22,(1,0):15,(1,1):13	0:22,1:6	5
A5SS	19:49588470:49588344|49588210:-@19:49578316:49584104:-	ENSG00000062370	0.22	0.08	0.41	0.7	0.45	0.96	-0.48	58.05	('19:49588470:49588344|49588210:-@19:49578316:49584104:-.A.dn_19:49588470:49588344|49588210:-@19:49578316:49584104:-.A.coreAndExt', '19:49588470:49588344|49588210:-@19:49578316:49584104:-.B.dn_19:49588470:49588344|49588210:-@19:49578316:49584104:-.B.core')	(0,0):55,(0,1):11,(1,0):6,(1,1):421	0:149,1:289	(0,0):51,(0,1):2,(1,0):9,(1,1):189	0:136,1:64	19
A5SS	20:43999464:43999744|43999631:+@20:44001027:44001169:+	ENSG00000100982	0.13	0.06	0.24	0.57	0.32	0.85	-0.44	52.68	('20:43999464:43999744|43999631:+@20:44001027:44001169:+.A.coreAndExt_20:43999464:43999744|43999631:+@20:44001027:44001169:+.A.dn', '20:43999464:43999744|43999631:+@20:44001027:44001169:+.B.core_20:43999464:43999744|43999631:+@20:44001027:44001169:+.B.dn')	(0,0):75,(0,1):14,(1,0):6,(1,1):14	0:10,1:24	(0,0):51,(0,1):2,(1,0):15,(1,1):9	0:19,1:7	20
A5SS	4:75397599:75397751|75397625:+@4:75399161:75400533:+	ENSG00000182585	0.73	0.52	0.91	0.2	0.04	0.44	0.53	47.96	('4:75397599:75397751|75397625:+@4:75399161:75400533:+.A.coreAndExt_4:75397599:75397751|75397625:+@4:75399161:75400533:+.A.dn', '4:75397599:75397751|75397625:+@4:75399161:75400533:+.B.core_4:75397599:75397751|75397625:+@4:75399161:75400533:+.B.dn')	(0,0):579,(1,0):43,(1,1):512	0:421,1:134	(0,0):246,(0,1):1,(1,0):4,(1,1):183	0:31,1:157	4
A5SS	22:49311771:49311541|49311296:-@22:49308865:49311213:-	ENSG00000130489,ENSG00000025708	0.5	0.33	0.74	0.17	0.09	0.27	0.33	19.75	('22:49311771:49311541|49311296:-@22:49308865:49311213:-.A.dn_22:49311771:49311541|49311296:-@22:49308865:49311213:-.A.coreAndExt', '22:49311771:49311541|49311296:-@22:49308865:49311213:-.B.dn_22:49311771:49311541|49311296:-@22:49308865:49311213:-.B.core')	(0,0):72,(1,0):21,(1,1):409	0:228,1:202	(0,0):103,(1,0):10,(1,1):591	0:76,1:525	22
A5SS	5:180191342:180191547|180191412:+@5:180193918:180195796:+	ENSG00000245060	0.05	0	0.14	0.6	0.2	0.92	-0.55	18.14	('5:180191342:180191547|180191412:+@5:180193918:180195796:+.A.coreAndExt_5:180191342:180191547|180191412:+@5:180193918:180195796:+.A.dn', '5:180191342:180191547|180191412:+@5:180193918:180195796:+.B.core_5:180191342:180191547|180191412:+@5:180193918:180195796:+.B.dn')	(0,0):33,(0,1):5,(1,1):273	0:17,1:261	(0,0):23,(1,0):5,(1,1):117	0:115,1:7	5
A5SS	10:27862670:27862929|27862788:+@10:27866811:27869264:+	ENSG00000099246	0.93	0.85	0.99	0.73	0.62	0.83	0.2	17.09	('10:27862670:27862929|27862788:+@10:27866811:27869264:+.A.coreAndExt_10:27862670:27862929|27862788:+@10:27866811:27869264:+.A.dn', '10:27862670:27862929|27862788:+@10:27866811:27869264:+.B.core_10:27862670:27862929|27862788:+@10:27866811:27869264:+.B.dn')	(0,0):648,(0,1):1,(1,0):159,(1,1):2105	0:2154,1:111	(0,0):687,(0,1):3,(1,0):128,(1,1):2402	0:1984,1:549	10
A5SS	20:33335709:33335598|33335393:-@20:33331159:33331335:-	ENSG00000242372,ENSG00000261582	0.24	0.16	0.34	0.51	0.36	0.68	-0.27	13.89	('20:33335709:33335598|33335393:-@20:33331159:33331335:-.A.dn_20:33335709:33335598|33335393:-@20:33331159:33331335:-.A.coreAndExt', '20:33335709:33335598|33335393:-@20:33331159:33331335:-.B.dn_20:33335709:33335598|33335393:-@20:33331159:33331335:-.B.core')	(0,0):2536,(1,0):50,(1,1):67	0:72,1:45	(0,0):1920,(0,1):1,(1,0):81,(1,1):47	0:108,1:21	20
A5SS	2:30224615:30224911|30224624:+@2:30232998:30233162:+	ENSG00000119801	0.12	0.06	0.24	0.6	0.24	0.96	-0.48	13.01	('2:30224615:30224911|30224624:+@2:30232998:30233162:+.A.coreAndExt_2:30224615:30224911|30224624:+@2:30232998:30233162:+.A.dn', '2:30224615:30224911|30224624:+@2:30232998:30233162:+.B.core_2:30224615:30224911|30224624:+@2:30232998:30233162:+.B.dn')	(0,0):281,(1,0):21,(1,1):10	0:23,1:8	(0,0):158,(1,0):23,(1,1):2	0:23,1:2	2
A5SS	4:41817068:41816899|41816828:-@4:41807627:41814509:-	ENSG00000188848	0.26	0.13	0.4	0.6	0.43	0.8	-0.34	12.67	('4:41817068:41816899|41816828:-@4:41807627:41814509:-.A.dn_4:41817068:41816899|41816828:-@4:41807627:41814509:-.A.coreAndExt', '4:41817068:41816899|41816828:-@4:41807627:41814509:-.B.dn_4:41817068:41816899|41816828:-@4:41807627:41814509:-.B.core')	(0,0):405,(0,1):13,(1,0):9,(1,1):1776	0:519,1:1279	(0,0):320,(0,1):9,(1,0):23,(1,1):1340	0:709,1:663	4
A5SS	6:28347611:28348092|28347691:+@6:28348426:28348543:+	ENSG00000197062	0.56	0.26	0.87	0.14	0.05	0.34	0.42	11.14	('6:28347611:28348092|28347691:+@6:28348426:28348543:+.A.coreAndExt_6:28347611:28348092|28347691:+@6:28348426:28348543:+.A.dn', '6:28347611:28348092|28347691:+@6:28348426:28348543:+.B.core_6:28347611:28348092|28347691:+@6:28348426:28348543:+.B.dn')	(0,0):128,(0,1):1,(1,0):45,(1,1):2	0:46,1:2	(0,0):64,(0,1):5,(1,0):13	0:13,1:5	6
A5SS	11:47273623:47273706|47273694:+@11:47274024:47274182:+	ENSG00000110514	0.3	0.16	0.49	0.7	0.51	0.86	-0.4	10.51	('11:47273623:47273706|47273694:+@11:47274024:47274182:+.A.coreAndExt_11:47273623:47273706|47273694:+@11:47274024:47274182:+.A.dn', '11:47273623:47273706|47273694:+@11:47274024:47274182:+.B.core_11:47273623:47273706|47273694:+@11:47274024:47274182:+.B.dn')	(0,0):286,(0,1):17,(1,0):9,(1,1):17	0:13,1:30	(0,0):202,(0,1):5,(1,0):15,(1,1):6	0:19,1:7	11
A5SS	17:17865896:17865784|17865780:-@17:17864967:17865277:-	ENSG00000171953	0.22	0.03	0.5	0.79	0.35	1	-0.57	10.27	('17:17865896:17865784|17865780:-@17:17864967:17865277:-.A.dn_17:17865896:17865784|17865780:-@17:17864967:17865277:-.A.coreAndExt', '17:17865896:17865784|17865780:-@17:17864967:17865277:-.B.dn_17:17865896:17865784|17865780:-@17:17864967:17865277:-.B.core')	(0,0):48,(0,1):5,(1,0):1,(1,1):2	0:2,1:6	(0,0):30,(1,0):2,(1,1):1	1904-01-01 00:03:00	17
A5SS	12:118707252:118707147|118706376:-@12:118704343:118706238:-	ENSG00000122966	0.15	0.06	0.26	0.57	0.3	0.84	-0.42	9.98	('12:118707252:118707147|118706376:-@12:118704343:118706238:-.A.dn_12:118707252:118707147|118706376:-@12:118704343:118706238:-.A.coreAndExt', '12:118707252:118707147|118706376:-@12:118704343:118706238:-.B.dn_12:118707252:118707147|118706376:-@12:118704343:118706238:-.B.core')	(0,0):65,(0,1):21,(1,0):7,(1,1):40	0:15,1:53	(0,0):38,(0,1):1,(1,0):7,(1,1):22	0:23,1:7	12
A5SS	19:40729861:40729991|40729986:+@19:40730066:40730272:+	ENSG00000105677	0.66	0.4	0.9	0.25	0.06	0.6	0.41	9.71	('19:40729861:40729991|40729986:+@19:40730066:40730272:+.A.coreAndExt_19:40729861:40729991|40729986:+@19:40730066:40730272:+.A.dn', '19:40729861:40729991|40729986:+@19:40730066:40730272:+.B.core_19:40729861:40729991|40729986:+@19:40730066:40730272:+.B.dn')	(0,0):555,(1,0):12,(1,1):349	0:204,1:157	(0,0):398,(1,0):2,(1,1):266	0:89,1:179	19
A5SS	13:32236627:32236732|32236726:+@13:32242259:32242698:+	ENSG00000083642	0.31	0.15	0.51	0.75	0.49	0.96	-0.44	8.93	('13:32236627:32236732|32236726:+@13:32242259:32242698:+.A.coreAndExt_13:32236627:32236732|32236726:+@13:32242259:32242698:+.A.dn', '13:32236627:32236732|32236726:+@13:32242259:32242698:+.B.core_13:32236627:32236732|32236726:+@13:32242259:32242698:+.B.dn')	(0,0):113,(0,1):15,(1,0):7,(1,1):72	0:30,1:64	(0,0):108,(0,1):2,(1,0):10,(1,1):63	0:62,1:13	13
A5SS	11:46344370:46345110|46344652:+@11:46345417:46345525:+	ENSG00000149091	0.28	0.08	0.74	0.79	0.45	1	-0.51	8.6	('11:46344370:46345110|46344652:+@11:46345417:46345525:+.A.coreAndExt_11:46344370:46345110|46344652:+@11:46345417:46345525:+.A.dn', '11:46344370:46345110|46344652:+@11:46345417:46345525:+.B.core_11:46344370:46345110|46344652:+@11:46345417:46345525:+.B.dn')	(0,0):113,(1,0):6,(1,1):8	0:6,1:8	(0,0):79,(1,0):7,(1,1):1	1904-01-01 00:08:00	11
A5SS	11:93869418:93869932|93869642:+@11:93870885:93872774:+	ENSG00000168876	0.94	0.83	0.99	0.72	0.57	0.85	0.22	8.36	('11:93869418:93869932|93869642:+@11:93870885:93872774:+.A.coreAndExt_11:93869418:93869932|93869642:+@11:93870885:93872774:+.A.dn', '11:93869418:93869932|93869642:+@11:93870885:93872774:+.B.core_11:93869418:93869932|93869642:+@11:93870885:93872774:+.B.dn')	(0,0):258,(1,0):94,(1,1):501	0:590,1:5	(0,0):137,(0,1):2,(1,0):60,(1,1):406	0:395,1:73	11
A5SS	2:74537969:74538495|74538173:+@2:74540278:74540380:+	ENSG00000239779,ENSG00000115274	0.29	0.16	0.46	0.66	0.42	0.9	-0.37	7.45	('2:74537969:74538495|74538173:+@2:74540278:74540380:+.A.coreAndExt_2:74537969:74538495|74538173:+@2:74540278:74540380:+.A.dn', '2:74537969:74538495|74538173:+@2:74540278:74540380:+.B.core_2:74537969:74538495|74538173:+@2:74540278:74540380:+.B.dn')	(0,0):223,(1,0):33,(1,1):24	0:40,1:17	(0,0):175,(1,0):44,(1,1):13	0:55,1:2	2
A5SS	3:173952634:173952956|173952920:+@3:173954993:173955144:+	ENSG00000114346	0.82	0.51	0.98	0.29	0.07	0.63	0.53	7.2	('3:173952634:173952956|173952920:+@3:173954993:173955144:+.A.coreAndExt_3:173952634:173952956|173952920:+@3:173954993:173955144:+.A.dn', '3:173952634:173952956|173952920:+@3:173954993:173955144:+.B.core_3:173952634:173952956|173952920:+@3:173954993:173955144:+.B.dn')	(0,0):111,(1,0):7,(1,1):11	0:16,1:2	(0,0):100,(0,1):3,(1,0):2,(1,1):18	0:4,1:19	3
A5SS	4:122996166:122996094|122996049:-@4:122995309:122995425:-	ENSG00000138686	0.05	0	0.18	0.57	0.16	0.98	-0.52	7.15	('4:122996166:122996094|122996049:-@4:122995309:122995425:-.A.dn_4:122996166:122996094|122996049:-@4:122995309:122995425:-.A.coreAndExt', '4:122996166:122996094|122996049:-@4:122995309:122995425:-.B.dn_4:122996166:122996094|122996049:-@4:122995309:122995425:-.B.core')	(0,0):50,(0,1):8,(1,1):5	0:0,1:13	(0,0):29,(1,0):2	1904-01-01 00:02:00	4
A5SS	10:102740616:102740801|102740757:+@10:102742937:102744150:+	ENSG00000107815	0.63	0.35	0.92	0.22	0.09	0.38	0.41	6.4	('10:102740616:102740801|102740757:+@10:102742937:102744150:+.A.coreAndExt_10:102740616:102740801|102740757:+@10:102742937:102744150:+.A.dn', '10:102740616:102740801|102740757:+@10:102742937:102744150:+.B.core_10:102740616:102740801|102740757:+@10:102742937:102744150:+.B.dn')	(0,0):49,(0,1):2,(1,0):12,(1,1):228	0:157,1:85	(0,0):52,(0,1):13,(1,0):6,(1,1):314	0:97,1:236	10
A5SS	10:126467716:126467602|126467598:-@10:126453234:126453341:-	ENSG00000203791,ENSG00000258539	0.64	0.43	0.86	0.28	0.11	0.49	0.36	6.33	('10:126467716:126467602|126467598:-@10:126453234:126453341:-.A.dn_10:126467716:126467602|126467598:-@10:126453234:126453341:-.A.coreAndExt', '10:126467716:126467602|126467598:-@10:126453234:126453341:-.B.dn_10:126467716:126467602|126467598:-@10:126453234:126453341:-.B.core')	(0,0):550,(0,1):5,(1,0):10,(1,1):3	0:12,1:6	(0,0):349,(0,1):15,(1,0):6,(1,1):2	0:8,1:15	10
A5SS	X:74437427:74437575|74437525:+@X:74439965:74441457:+	ENSG00000094841	0.12	0.03	0.31	0.45	0.23	0.72	-0.33	6.27	('X:74437427:74437575|74437525:+@X:74439965:74441457:+.A.coreAndExt_X:74437427:74437575|74437525:+@X:74439965:74441457:+.A.dn', 'X:74437427:74437575|74437525:+@X:74439965:74441457:+.B.core_X:74437427:74437575|74437525:+@X:74439965:74441457:+.B.dn')	(0,0):58,(0,1):11,(1,0):2,(1,1):251	0:14,1:250	(0,0):65,(0,1):6,(1,0):7,(1,1):189	0:55,1:147	X
A5SS	14:22862426:22862631|22862532:+@14:22863187:22864680:+	ENSG00000100836,ENSG00000258643	0.27	0.15	0.41	0.63	0.38	0.92	-0.36	6.07	('14:22862426:22862631|22862532:+@14:22863187:22864680:+.A.coreAndExt_14:22862426:22862631|22862532:+@14:22863187:22864680:+.A.dn', '14:22862426:22862631|22862532:+@14:22863187:22864680:+.B.core_14:22862426:22862631|22862532:+@14:22863187:22864680:+.B.dn')	(0,0):1167,(1,0):10,(1,1):541	0:121,1:430	(0,0):1073,(1,0):21,(1,1):436	0:248,1:209	14
A5SS	12:55916731:55916637|55916374:-@12:55915130:55915859:-	ENSG00000185633	0.09	0.01	0.25	0.49	0.21	0.82	-0.4	5.89	('12:55916731:55916637|55916374:-@12:55915130:55915859:-.A.dn_12:55916731:55916637|55916374:-@12:55915130:55915859:-.A.coreAndExt', '12:55916731:55916637|55916374:-@12:55915130:55915859:-.B.dn_12:55916731:55916637|55916374:-@12:55915130:55915859:-.B.core')	(0,0):64,(1,0):1,(1,1):55	0:5,1:51	(0,0):12,(1,0):4,(1,1):16	0:15,1:5	12
A5SS	19:63774608:63774341|63774173:-@19:63773523:63773706:-	ENSG00000099326	0.38	0.23	0.53	0.74	0.48	0.94	-0.36	5.85	('19:63774608:63774341|63774173:-@19:63773523:63773706:-.A.dn_19:63774608:63774341|63774173:-@19:63773523:63773706:-.A.coreAndExt', '19:63774608:63774341|63774173:-@19:63773523:63773706:-.B.dn_19:63774608:63774341|63774173:-@19:63773523:63773706:-.B.core')	(0,0):94,(0,1):7,(1,0):25,(1,1):37	0:42,1:27	(0,0):48,(0,1):1,(1,0):17,(1,1):9	0:20,1:7	19
A5SS	9:35082764:35082540|35081237:-@9:35080463:35080669:-	ENSG00000165282	0.44	0.29	0.68	0.84	0.6	0.99	-0.4	5.76	('9:35082764:35082540|35081237:-@9:35080463:35080669:-.A.dn_9:35082764:35082540|35081237:-@9:35080463:35080669:-.A.coreAndExt', '9:35082764:35082540|35081237:-@9:35080463:35080669:-.B.dn_9:35082764:35082540|35081237:-@9:35080463:35080669:-.B.core')	(0,0):57,(0,1):1,(1,0):120,(1,1):24	0:131,1:14	(0,0):39,(1,0):107,(1,1):7	0:113,1:1	9
A5SS	17:35463414:35463252|35463241:-@17:35463077:35463159:-	ENSG00000008838	0.29	0.08	0.63	0.83	0.55	0.99	-0.54	5.74	('17:35463414:35463252|35463241:-@17:35463077:35463159:-.A.dn_17:35463414:35463252|35463241:-@17:35463077:35463159:-.A.coreAndExt', '17:35463414:35463252|35463241:-@17:35463077:35463159:-.B.dn_17:35463414:35463252|35463241:-@17:35463077:35463159:-.B.core')	(0,0):109,(0,1):2,(1,0):1,(1,1):8	0:5,1:6	(0,0):125,(1,0):8,(1,1):7	1904-01-01 00:15:00	17
A5SS	1:181041903:181042289|181041990:+@1:181047914:181047971:+	ENSG00000135838	0.13	0.02	0.45	0.67	0.07	0.98	-0.54	5.57	('1:181041903:181042289|181041990:+@1:181047914:181047971:+.A.coreAndExt_1:181041903:181042289|181041990:+@1:181047914:181047971:+.A.dn', '1:181041903:181042289|181041990:+@1:181047914:181047971:+.B.core_1:181041903:181042289|181041990:+@1:181047914:181047971:+.B.dn')	(0,0):67,(0,1):2,(1,0):4	0:4,1:2	(0,0):75,(1,0):5	1904-01-01 00:05:00	1
A5SS	22:17776116:17776006|17775797:-@22:17774707:17774797:-	ENSG00000242259,ENSG00000100084	0.47	0.26	0.73	0.14	0.06	0.24	0.33	5.57	('22:17776116:17776006|17775797:-@22:17774707:17774797:-.A.dn_22:17776116:17776006|17775797:-@22:17774707:17774797:-.A.coreAndExt', '22:17776116:17776006|17775797:-@22:17774707:17774797:-.B.dn_22:17776116:17776006|17775797:-@22:17774707:17774797:-.B.core')	(0,0):74,(0,1):4,(1,0):26	0:26,1:4	(0,0):58,(0,1):14,(1,0):17	0:17,1:14	22
A5SS	7:72736033:72736266|72736167:+@7:72738902:72738997:+	ENSG00000071462	0.26	0.07	0.55	0.78	0.4	1	-0.52	5.45	('7:72736033:72736266|72736167:+@7:72738902:72738997:+.A.coreAndExt_7:72736033:72736266|72736167:+@7:72738902:72738997:+.A.dn', '7:72736033:72736266|72736167:+@7:72738902:72738997:+.B.core_7:72736033:72736266|72736167:+@7:72738902:72738997:+.B.dn')	(0,0):407,(0,1):2,(1,0):3,(1,1):5	0:8,1:2	(0,0):262,(1,0):7,(1,1):1	1904-01-01 00:08:00	7
A5SS	1:223221756:223221908|223221839:+@1:223223084:223224156:+	ENSG00000185842	0.15	0.05	0.33	0.66	0.31	0.93	-0.51	5.44	('1:223221756:223221908|223221839:+@1:223223084:223224156:+.A.coreAndExt_1:223221756:223221908|223221839:+@1:223223084:223224156:+.A.dn', '1:223221756:223221908|223221839:+@1:223223084:223224156:+.B.core_1:223221756:223221908|223221839:+@1:223223084:223224156:+.B.dn')	(0,0):317,(0,1):8,(1,0):2,(1,1):99	0:10,1:99	(0,0):179,(0,1):1,(1,0):5,(1,1):52	0:54,1:4	1
A5SS	X:134538784:134539018|134538886:+@X:134541379:134541753:+	ENSG00000165359	0.43	0.31	0.56	0.75	0.55	0.9	-0.32	5.38	('X:134538784:134539018|134538886:+@X:134541379:134541753:+.A.coreAndExt_X:134538784:134539018|134538886:+@X:134541379:134541753:+.A.dn', 'X:134538784:134539018|134538886:+@X:134541379:134541753:+.B.core_X:134538784:134539018|134538886:+@X:134541379:134541753:+.B.dn')	(0,0):113,(0,1):10,(1,0):36,(1,1):67	0:68,1:45	(0,0):67,(0,1):3,(1,0):43,(1,1):41	0:68,1:19	X
A5SS	19:5865951:5866157|5866076:+@19:5866232:5868243:+	ENSG00000105519	0.84	0.62	0.98	0.39	0.15	0.73	0.45	5.26	('19:5865951:5866157|5866076:+@19:5866232:5868243:+.A.coreAndExt_19:5865951:5866157|5866076:+@19:5866232:5868243:+.A.dn', '19:5865951:5866157|5866076:+@19:5866232:5868243:+.B.core_19:5865951:5866157|5866076:+@19:5866232:5868243:+.B.dn')	(0,0):43,(1,0):14,(1,1):253	0:259,1:8	(0,0):32,(1,0):3,(1,1):241	0:63,1:181	19
A5SS	20:31443709:31443609|31443602:-@20:31438786:31439000:-	ENSG00000101391	0.46	0.26	0.65	0.15	0.03	0.34	0.31	5.26	('20:31443709:31443609|31443602:-@20:31438786:31439000:-.A.dn_20:31443709:31443609|31443602:-@20:31438786:31439000:-.A.coreAndExt', '20:31443709:31443609|31443602:-@20:31438786:31439000:-.B.dn_20:31443709:31443609|31443602:-@20:31438786:31439000:-.B.core')	(0,0):127,(0,1):11,(1,0):11,(1,1):30	0:21,1:31	(0,0):162,(0,1):16,(1,0):2,(1,1):22	0:6,1:34	20
A5SS	14:19882931:19883125|19883086:+@14:19883393:19883463:+	ENSG00000129484	0.07	0.02	0.18	0.35	0.15	0.58	-0.28	5.24	('14:19882931:19883125|19883086:+@14:19883393:19883463:+.A.coreAndExt_14:19882931:19883125|19883086:+@14:19883393:19883463:+.A.dn', '14:19882931:19883125|19883086:+@14:19883393:19883463:+.B.core_14:19882931:19883125|19883086:+@14:19883393:19883463:+.B.dn')	(0,0):35,(0,1):20,(1,0):2,(1,1):8	0:3,1:27	(0,0):26,(0,1):6,(1,0):6,(1,1):6	0:7,1:11	14
A5SS	7:72736033:72736189|72736167:+@7:72738902:72738997:+	ENSG00000071462	0.25	0.03	0.68	0.76	0.25	0.99	-0.51	5.21	('7:72736033:72736189|72736167:+@7:72738902:72738997:+.A.coreAndExt_7:72736033:72736189|72736167:+@7:72738902:72738997:+.A.dn', '7:72736033:72736189|72736167:+@7:72738902:72738997:+.B.core_7:72736033:72736189|72736167:+@7:72738902:72738997:+.B.dn')	(0,0):409,(0,1):2,(1,0):1,(1,1):5	0:3,1:5	(0,0):266,(1,0):3,(1,1):1	1904-01-01 00:04:00	7
A5SS	12:55916731:55916643|55916374:-@12:55915130:55915859:-	ENSG00000185633	0.05	0.01	0.16	0.52	0.16	0.92	-0.47	5.07	('12:55916731:55916643|55916374:-@12:55915130:55915859:-.A.dn_12:55916731:55916643|55916374:-@12:55915130:55915859:-.A.coreAndExt', '12:55916731:55916643|55916374:-@12:55915130:55915859:-.B.dn_12:55916731:55916643|55916374:-@12:55915130:55915859:-.B.core')	(0,0):62,(0,1):2,(1,0):1,(1,1):55	0:5,1:53	(0,0):12,(1,0):4,(1,1):16	0:7,1:13	12
A5SS	10:69768266:69768454|69768405:+@10:69768903:69770016:+	ENSG00000096746	0.59	0.41	0.77	0.3	0.14	0.46	0.29	4.87	('10:69768266:69768454|69768405:+@10:69768903:69770016:+.A.coreAndExt_10:69768266:69768454|69768405:+@10:69768903:69770016:+.A.dn', '10:69768266:69768454|69768405:+@10:69768903:69770016:+.B.core_10:69768266:69768454|69768405:+@10:69768903:69770016:+.B.dn')	(0,0):444,(0,1):11,(1,0):18,(1,1):68	0:60,1:37	(0,0):361,(0,1):14,(1,0):7,(1,1):48	0:17,1:52	10
A5SS	12:122031629:122031799|122031766:+@12:122032071:122032390:+	ENSG00000182196,ENSG00000256028	0.73	0.57	0.89	0.47	0.36	0.61	0.26	4.83	('12:122031629:122031799|122031766:+@12:122032071:122032390:+.A.coreAndExt_12:122031629:122031799|122031766:+@12:122032071:122032390:+.A.dn', '12:122031629:122031799|122031766:+@12:122032071:122032390:+.B.core_12:122031629:122031799|122031766:+@12:122032071:122032390:+.B.dn')	(0,0):996,(0,1):1,(1,0):85,(1,1):576	0:463,1:199	(0,0):727,(0,1):3,(1,0):50,(1,1):495	0:244,1:304	12
A5SS	9:139590440:139590353|139589982:-@9:139589025:139589116:-	ENSG00000148399	0.67	0.3	0.99	0.24	0.08	0.57	0.43	4.8	('9:139590440:139590353|139589982:-@9:139589025:139589116:-.A.dn_9:139590440:139590353|139589982:-@9:139589025:139589116:-.A.coreAndExt', '9:139590440:139590353|139589982:-@9:139589025:139589116:-.B.dn_9:139590440:139590353|139589982:-@9:139589025:139589116:-.B.core')	(0,0):139,(1,0):30	1904-01-01 00:30:00	(0,0):118,(0,1):4,(1,0):25	0:25,1:4	9
A5SS	14:49858979:49859274|49859187:+@14:49862077:49862702:+	ENSG00000125375,ENSG00000258447	0.37	0.18	0.58	0.81	0.47	0.99	-0.44	4.67	('14:49858979:49859274|49859187:+@14:49862077:49862702:+.A.coreAndExt_14:49858979:49859274|49859187:+@14:49862077:49862702:+.A.dn', '14:49858979:49859274|49859187:+@14:49862077:49862702:+.B.core_14:49858979:49859274|49859187:+@14:49862077:49862702:+.B.dn')	(0,0):231,(0,1):1,(1,0):8,(1,1):131	0:33,1:107	(0,0):166,(1,0):13,(1,1):72	0:63,1:22	14
A5SS	19:15432069:15432032|15432014:-@19:15430340:15430466:-	ENSG00000105122	0.87	0.58	0.98	0.45	0.18	0.82	0.42	4.5	('19:15432069:15432032|15432014:-@19:15430340:15430466:-.A.dn_19:15432069:15432032|15432014:-@19:15430340:15430466:-.A.coreAndExt', '19:15432069:15432032|15432014:-@19:15430340:15430466:-.B.dn_19:15432069:15432032|15432014:-@19:15430340:15430466:-.B.core')	(0,0):161,(1,0):13,(1,1):6	1904-01-01 00:19:00	(0,0):110,(0,1):2,(1,0):3,(1,1):1	0:3,1:3	19
A5SS	2:150135931:150135848|150135841:-@2:150134164:150134928:-	ENSG00000168288	0.1	0	0.28	0.45	0.16	0.83	-0.35	4.5	('2:150135931:150135848|150135841:-@2:150134164:150134928:-.A.dn_2:150135931:150135848|150135841:-@2:150134164:150134928:-.A.coreAndExt', '2:150135931:150135848|150135841:-@2:150134164:150134928:-.B.dn_2:150135931:150135848|150135841:-@2:150134164:150134928:-.B.core')	(0,0):639,(1,1):1126	0:199,1:927	(0,0):553,(1,0):4,(1,1):941	0:256,1:689	2
A5SS	17:73638957:73639413|73639081:+@17:73640035:73640184:+	ENSG00000167895	0.86	0.54	0.99	0.44	0.12	0.74	0.42	4.38	('17:73638957:73639413|73639081:+@17:73640035:73640184:+.A.coreAndExt_17:73638957:73639413|73639081:+@17:73640035:73640184:+.A.dn', '17:73638957:73639413|73639081:+@17:73640035:73640184:+.B.core_17:73638957:73639413|73639081:+@17:73640035:73640184:+.B.dn')	(0,0):26,(1,0):23	1904-01-01 00:23:00	(0,0):14,(1,0):4,(1,1):2	0:5,1:1	17
A5SS	2:30224615:30224911|30224675:+@2:30232998:30233162:+	ENSG00000119801	0.37	0.17	0.66	0.79	0.41	0.98	-0.42	4.36	('2:30224615:30224911|30224675:+@2:30232998:30233162:+.A.coreAndExt_2:30224615:30224911|30224675:+@2:30232998:30233162:+.A.dn', '2:30224615:30224911|30224675:+@2:30232998:30233162:+.B.core_2:30224615:30224911|30224675:+@2:30232998:30233162:+.B.dn')	(0,0):281,(1,0):21,(1,1):10	0:25,1:6	(0,0):158,(1,0):23,(1,1):2	0:24,1:1	2
A5SS	21:33761299:33761187|33761183:-@21:33759195:33759586:-	ENSG00000142188	0.12	0.02	0.31	0.41	0.22	0.6	-0.29	4.2	('21:33761299:33761187|33761183:-@21:33759195:33759586:-.A.dn_21:33761299:33761187|33761183:-@21:33759195:33759586:-.A.coreAndExt', '21:33761299:33761187|33761183:-@21:33759195:33759586:-.B.dn_21:33761299:33761187|33761183:-@21:33759195:33759586:-.B.core')	(0,0):159,(0,1):17,(1,0):2,(1,1):2	0:2,1:19	(0,0):130,(0,1):12,(1,0):8,(1,1):2	0:8,1:14	21
A5SS	2:48591983:48592120|48592111:+@2:48595358:48596035:+	ENSG00000162869	0.16	0.02	0.41	0.72	0.22	0.99	-0.56	4.12	('2:48591983:48592120|48592111:+@2:48595358:48596035:+.A.coreAndExt_2:48591983:48592120|48592111:+@2:48595358:48596035:+.A.dn', '2:48591983:48592120|48592111:+@2:48595358:48596035:+.B.core_2:48591983:48592120|48592111:+@2:48595358:48596035:+.B.dn')	(0,0):41,(0,1):9,(1,0):1,(1,1):41	0:4,1:47	(0,0):34,(1,0):1,(1,1):25	0:19,1:7	2
A5SS	14:103562769:103563031|103563029:+@14:103567198:103567353:+	ENSG00000156414	0.06	0	0.23	0.53	0.09	0.92	-0.47	4.11	('14:103562769:103563031|103563029:+@14:103567198:103567353:+.A.coreAndExt_14:103562769:103563031|103563029:+@14:103567198:103567353:+.A.dn', '14:103562769:103563031|103563029:+@14:103567198:103567353:+.B.core_14:103562769:103563031|103563029:+@14:103567198:103567353:+.B.dn')	(0,0):114,(0,1):14,(1,1):25	0:0,1:39	(0,0):45,(1,1):3	1904-01-01 00:03:00	14
A5SS	4:48548580:48548798|48548794:+@4:48557499:48559756:+	ENSG00000109180	0.65	0.19	0.99	0.22	0.05	0.61	0.43	4.08	('4:48548580:48548798|48548794:+@4:48557499:48559756:+.A.coreAndExt_4:48548580:48548798|48548794:+@4:48557499:48559756:+.A.dn', '4:48548580:48548798|48548794:+@4:48557499:48559756:+.B.core_4:48548580:48548798|48548794:+@4:48557499:48559756:+.B.dn')	(0,0):2024,(1,1):1065	0:187,1:878	(0,0):1432,(0,1):1,(1,1):791	0:46,1:746	4
A5SS	15:68137051:68136867|68136852:-@15:68131767:68135767:-	ENSG00000140332	0.35	0.07	0.72	0.85	0.55	0.98	-0.5	3.94	('15:68137051:68136867|68136852:-@15:68131767:68135767:-.A.dn_15:68137051:68136867|68136852:-@15:68131767:68135767:-.A.coreAndExt', '15:68137051:68136867|68136852:-@15:68131767:68135767:-.B.dn_15:68137051:68136867|68136852:-@15:68131767:68135767:-.B.core')	(0,0):171,(0,1):1,(1,0):1,(1,1):152	0:61,1:93	(0,0):124,(1,0):6,(1,1):140	0:124,1:22	15
A5SS	20:43906466:43906309|43906303:-@20:43905573:43905767:-	ENSG00000101473	0.18	0.07	0.34	0.47	0.26	0.7	-0.29	3.86	('20:43906466:43906309|43906303:-@20:43905573:43905767:-.A.dn_20:43906466:43906309|43906303:-@20:43905573:43905767:-.A.coreAndExt', '20:43906466:43906309|43906303:-@20:43905573:43905767:-.B.dn_20:43906466:43906309|43906303:-@20:43905573:43905767:-.B.core')	(0,0):100,(0,1):23,(1,0):4,(1,1):21	0:8,1:40	(0,0):46,(0,1):6,(1,0):5,(1,1):8	0:8,1:11	20
A5SS	10:91162659:91162528|91162375:-@10:90977500:90978135:-	ENSG00000266769,ENSG00000107798	0.24	0.02	0.72	0.68	0.23	0.96	-0.44	3.74	('10:91162659:91162528|91162375:-@10:90977500:90978135:-.A.dn_10:91162659:91162528|91162375:-@10:90977500:90978135:-.A.coreAndExt', '10:91162659:91162528|91162375:-@10:90977500:90978135:-.B.dn_10:91162659:91162528|91162375:-@10:90977500:90978135:-.B.core')	(0,0):592,(1,1):13	0:3,1:10	(0,0):1308,(1,0):3,(1,1):13	0:8,1:8	10
A5SS	4:185961694:185961535|185961468:-@4:185946595:185946879:-	ENSG00000249138,ENSG00000151726	0.96	0.87	1	0.51	0.09	0.89	0.45	3.74	('4:185961694:185961535|185961468:-@4:185946595:185946879:-.A.dn_4:185961694:185961535|185961468:-@4:185946595:185946879:-.A.coreAndExt', '4:185961694:185961535|185961468:-@4:185946595:185946879:-.B.dn_4:185961694:185961535|185961468:-@4:185946595:185946879:-.B.core')	(0,0):192,(1,0):37,(1,1):13	1904-01-01 00:50:00	(0,0):141,(1,0):2,(1,1):7	0:6,1:3	4
A5SS	10:69775674:69775594|69775465:-@10:69770870:69771051:-	ENSG00000204130	0.6	0.26	0.91	0.15	0.01	0.6	0.45	3.52	('10:69775674:69775594|69775465:-@10:69770870:69771051:-.A.dn_10:69775674:69775594|69775465:-@10:69770870:69771051:-.A.coreAndExt', '10:69775674:69775594|69775465:-@10:69770870:69771051:-.B.dn_10:69775674:69775594|69775465:-@10:69770870:69771051:-.B.core')	(0,0):1251,(1,0):5,(1,1):4	0:7,1:2	(0,0):848,(1,1):6	0:1,1:5	10
A5SS	6:160138309:160138391|160138369:+@6:160139074:160140008:+	ENSG00000112110	0.1	0	0.29	0.42	0.2	0.69	-0.32	3.47	('6:160138309:160138391|160138369:+@6:160139074:160140008:+.A.coreAndExt_6:160138309:160138391|160138369:+@6:160139074:160140008:+.A.dn', '6:160138309:160138391|160138369:+@6:160139074:160140008:+.B.core_6:160138309:160138391|160138369:+@6:160139074:160140008:+.B.dn')	(0,0):930,(0,1):1,(1,0):1,(1,1):597	0:60,1:539	(0,0):726,(1,0):7,(1,1):537	0:255,1:289	6
A5SS	4:57594234:57594118|57594114:-@4:57592001:57593475:-	ENSG00000250610,ENSG00000163453	0.14	0.04	0.31	0.52	0.22	0.82	-0.38	3.42	('4:57594234:57594118|57594114:-@4:57592001:57593475:-.A.dn_4:57594234:57594118|57594114:-@4:57592001:57593475:-.A.coreAndExt', '4:57594234:57594118|57594114:-@4:57592001:57593475:-.B.dn_4:57594234:57594118|57594114:-@4:57592001:57593475:-.B.core')	(0,0):186,(0,1):17,(1,0):2,(1,1):112	0:14,1:117	(0,0):91,(0,1):3,(1,0):3,(1,1):35	0:20,1:21	4
A5SS	5:138118282:138118751|138118299:+@5:138145511:138145617:+	ENSG00000265361,ENSG00000044115	0.02	0	0.16	0.56	0.08	0.97	-0.54	3.42	('5:138118282:138118751|138118299:+@5:138145511:138145617:+.A.coreAndExt_5:138118282:138118751|138118299:+@5:138145511:138145617:+.A.dn', '5:138118282:138118751|138118299:+@5:138145511:138145617:+.B.core_5:138118282:138118751|138118299:+@5:138145511:138145617:+.B.dn')	(0,0):668,(1,0):11,(1,1):6	0:11,1:6	(0,0):593,(1,0):7,(1,1):1	0:7,1:1	5
A5SS	4:77175296:77175224|77175220:-@4:77173859:77174993:-	ENSG00000169248	0.63	0.19	0.94	0.14	0.01	0.4	0.49	3.41	('4:77175296:77175224|77175220:-@4:77173859:77174993:-.A.dn_4:77175296:77175224|77175220:-@4:77173859:77174993:-.A.coreAndExt', '4:77175296:77175224|77175220:-@4:77173859:77174993:-.B.dn_4:77175296:77175224|77175220:-@4:77173859:77174993:-.B.core')	(0,0):3,(1,1):23	0:17,1:6	(0,0):23,(0,1):5,(1,1):95	0:10,1:90	4
A5SS	6:28347611:28348095|28347691:+@6:28348426:28348543:+	ENSG00000197062	0.52	0.25	0.84	0.15	0.05	0.36	0.37	3.4	('6:28347611:28348095|28347691:+@6:28348426:28348543:+.A.coreAndExt_6:28347611:28348095|28347691:+@6:28348426:28348543:+.A.dn', '6:28347611:28348095|28347691:+@6:28348426:28348543:+.B.core_6:28347611:28348095|28347691:+@6:28348426:28348543:+.B.dn')	(0,0):125,(0,1):1,(1,0):48,(1,1):2	0:50,1:1	(0,0):63,(0,1):5,(1,0):14	0:14,1:5	6
A5SS	4:84125053:84125001|84124338:-@4:84119060:84119183:-	ENSG00000189308	0.31	0.13	0.6	0.73	0.28	0.98	-0.42	3.32	('4:84125053:84125001|84124338:-@4:84119060:84119183:-.A.dn_4:84125053:84125001|84124338:-@4:84119060:84119183:-.A.coreAndExt', '4:84125053:84125001|84124338:-@4:84119060:84119183:-.B.dn_4:84125053:84125001|84124338:-@4:84119060:84119183:-.B.core')	(0,0):131,(0,1):3,(1,0):111,(1,1):2	0:113,1:3	(0,0):102,(1,0):105	0.0729167	4
A5SS	9:33458143:33458028|33458008:-@9:33457689:33457866:-	ENSG00000165271	0.38	0.11	0.65	0.05	0	0.17	0.33	3.29	('9:33458143:33458028|33458008:-@9:33457689:33457866:-.A.dn_9:33458143:33458028|33458008:-@9:33457689:33457866:-.A.coreAndExt', '9:33458143:33458028|33458008:-@9:33457689:33457866:-.B.dn_9:33458143:33458028|33458008:-@9:33457689:33457866:-.B.core')	(0,0):37,(0,1):5,(1,0):3,(1,1):2	0:3,1:7	(0,0):79,(0,1):15,(1,1):9	0:0,1:24	9
A5SS	8:23355181:23355051|23355027:-@8:23353207:23353373:-	ENSG00000197217	0.32	0.2	0.44	0.55	0.39	0.72	-0.23	3.28	('8:23355181:23355051|23355027:-@8:23353207:23353373:-.A.dn_8:23355181:23355051|23355027:-@8:23353207:23353373:-.A.coreAndExt', '8:23355181:23355051|23355027:-@8:23353207:23353373:-.B.dn_8:23355181:23355051|23355027:-@8:23353207:23353373:-.B.core')	(0,0):219,(0,1):27,(1,0):17,(1,1):19	0:20,1:43	(0,0):179,(0,1):13,(1,0):23,(1,1):17	0:33,1:20	8
A5SS	11:93869418:93869891|93869642:+@11:93870885:93872774:+	ENSG00000168876	0.94	0.84	1	0.74	0.59	0.87	0.2	3.23	('11:93869418:93869891|93869642:+@11:93870885:93872774:+.A.coreAndExt_11:93869418:93869891|93869642:+@11:93870885:93872774:+.A.dn', '11:93869418:93869891|93869642:+@11:93870885:93872774:+.B.core_11:93869418:93869891|93869642:+@11:93870885:93872774:+.B.dn')	(0,0):268,(1,0):84,(1,1):501	0:561,1:24	(0,0):142,(0,1):2,(1,0):55,(1,1):406	0:394,1:69	11
A5SS	X:47212103:47211753|47211667:-@X:47200615:47200757:-	ENSG00000147124	0.71	0.24	0.99	0.2	0.01	0.79	0.51	3.19	('X:47212103:47211753|47211667:-@X:47200615:47200757:-.A.dn_X:47212103:47211753|47211667:-@X:47200615:47200757:-.A.coreAndExt', 'X:47212103:47211753|47211667:-@X:47200615:47200757:-.B.dn_X:47212103:47211753|47211667:-@X:47200615:47200757:-.B.core')	(0,0):84,(1,0):2,(1,1):8	0:9,1:1	(0,0):44,(1,1):10	0:4,1:6	X
A5SS	11:64293386:64293271|64293267:-@11:64293070:64293177:-	ENSG00000168066	0.37	0.23	0.52	0.13	0.04	0.27	0.24	3.16	('11:64293386:64293271|64293267:-@11:64293070:64293177:-.A.dn_11:64293386:64293271|64293267:-@11:64293070:64293177:-.A.coreAndExt', '11:64293386:64293271|64293267:-@11:64293070:64293177:-.B.dn_11:64293386:64293271|64293267:-@11:64293070:64293177:-.B.core')	(0,0):207,(0,1):24,(1,0):15,(1,1):6	0:16,1:29	(0,0):144,(0,1):22,(1,0):3,(1,1):7	0:3,1:29	11
A5SS	16:11004432:11004663|11004615:+@16:11021551:11021683:+	ENSG00000038532	0.21	0.07	0.42	0.7	0.27	0.98	-0.49	3.15	('16:11004432:11004663|11004615:+@16:11021551:11021683:+.A.coreAndExt_16:11004432:11004663|11004615:+@16:11021551:11021683:+.A.dn', '16:11004432:11004663|11004615:+@16:11021551:11021683:+.B.core_16:11004432:11004663|11004615:+@16:11021551:11021683:+.B.dn')	(0,0):250,(0,1):9,(1,0):4,(1,1):9	0:4,1:18	(0,0):171,(1,0):4,(1,1):5	0:6,1:3	16
A5SS	3:133533181:133533271|133533267:+@3:133533726:133534160:+	ENSG00000014257	0.43	0.1	0.83	0.05	0	0.18	0.38	3.09	('3:133533181:133533271|133533267:+@3:133533726:133534160:+.A.coreAndExt_3:133533181:133533271|133533267:+@3:133533726:133534160:+.A.dn', '3:133533181:133533271|133533267:+@3:133533726:133534160:+.B.core_3:133533181:133533271|133533267:+@3:133533726:133534160:+.B.dn')	(0,0):22,(0,1):1,(1,1):2	0:1,1:2	(0,0):73,(0,1):18,(1,1):8	0:0,1:26	3
A5SS	2:85451720:85452196|85451843:+@2:85457978:85458108:+	ENSG00000115459	0.71	0.31	0.96	0.31	0.07	0.71	0.4	3.01	('2:85451720:85452196|85451843:+@2:85457978:85458108:+.A.coreAndExt_2:85451720:85452196|85451843:+@2:85457978:85458108:+.A.dn', '2:85451720:85452196|85451843:+@2:85457978:85458108:+.B.core_2:85451720:85452196|85451843:+@2:85457978:85458108:+.B.dn')	(0,0):52,(1,0):11,(1,1):1	1904-01-01 00:12:00	(0,0):34,(1,0):4,(1,1):3	0:5,1:2	2
A5SS	12:108780381:108780328|108780043:-@12:108779714:108779847:-	ENSG00000139433	0.6	0.09	0.94	0.08	0	0.41	0.52	2.99	('12:108780381:108780328|108780043:-@12:108779714:108779847:-.A.dn_12:108780381:108780328|108780043:-@12:108779714:108779847:-.A.coreAndExt', '12:108780381:108780328|108780043:-@12:108779714:108779847:-.B.dn_12:108780381:108780328|108780043:-@12:108779714:108779847:-.B.core')	(0,0):36,(1,0):4,(1,1):1	0:4,1:1	(0,0):34,(1,1):3	0:0,1:3	12
A5SS	14:101769879:101769778|101768625:-@14:101764927:101765747:-	ENSG00000080823	0.29	0.13	0.59	0.69	0.38	0.95	-0.4	2.99	('14:101769879:101769778|101768625:-@14:101764927:101765747:-.A.dn_14:101769879:101769778|101768625:-@14:101764927:101765747:-.A.coreAndExt', '14:101769879:101769778|101768625:-@14:101764927:101765747:-.B.dn_14:101769879:101769778|101768625:-@14:101764927:101765747:-.B.core')	(0,0):17,(1,0):10,(1,1):22	0:14,1:18	(0,0):25,(1,0):23,(1,1):15	0:37,1:1	14
A5SS	11:47263068:47263321|47263192:+@11:47263578:47263717:+	ENSG00000110514	0.34	0.25	0.44	0.55	0.4	0.71	-0.21	2.96	('11:47263068:47263321|47263192:+@11:47263578:47263717:+.A.coreAndExt_11:47263068:47263321|47263192:+@11:47263578:47263717:+.A.dn', '11:47263068:47263321|47263192:+@11:47263578:47263717:+.B.core_11:47263068:47263321|47263192:+@11:47263578:47263717:+.B.dn')	(0,0):203,(0,1):26,(1,0):60,(1,1):28	0:66,1:48	(0,0):107,(0,1):9,(1,0):50,(1,1):13	0:61,1:11	11
A5SS	2:85436189:85436530|85436350:+@2:85437601:85438376:+	ENSG00000115459	0.87	0.54	1	0.53	0.17	0.86	0.34	2.94	('2:85436189:85436530|85436350:+@2:85437601:85438376:+.A.coreAndExt_2:85436189:85436530|85436350:+@2:85437601:85438376:+.A.dn', '2:85436189:85436530|85436350:+@2:85437601:85438376:+.B.core_2:85436189:85436530|85436350:+@2:85437601:85438376:+.B.dn')	(0,0):58,(1,0):10,(1,1):23	1904-01-01 00:33:00	(0,0):43,(1,0):4,(1,1):19	0:20,1:3	2
A5SS	1:202032044:202032352|202032105:+@1:202037326:202038767:+	ENSG00000257315,ENSG00000058673	0.54	0.44	0.65	0.78	0.61	0.97	-0.24	2.9	('1:202032044:202032352|202032105:+@1:202037326:202038767:+.A.coreAndExt_1:202032044:202032352|202032105:+@1:202037326:202038767:+.A.dn', '1:202032044:202032352|202032105:+@1:202037326:202038767:+.B.core_1:202032044:202032352|202032105:+@1:202037326:202038767:+.B.dn')	(0,0):2152,(0,1):1,(1,0):99,(1,1):859	0:574,1:385	(0,0):1151,(1,0):83,(1,1):514	0:520,1:77	1
A5SS	2:10848410:10848353|10848292:-@2:10847326:10847466:-	ENSG00000143870	0.23	0.13	0.36	0.47	0.31	0.67	-0.24	2.9	('2:10848410:10848353|10848292:-@2:10847326:10847466:-.A.dn_2:10848410:10848353|10848292:-@2:10847326:10847466:-.A.coreAndExt', '2:10848410:10848353|10848292:-@2:10847326:10847466:-.B.dn_2:10848410:10848353|10848292:-@2:10847326:10847466:-.B.core')	(0,0):1440,(1,0):21,(1,1):64	0:34,1:51	(0,0):1008,(1,0):32,(1,1):46	0:53,1:25	2
A5SS	6:35459332:35459646|35459489:+@6:35486742:35486972:+	ENSG00000112033	0.1	0.02	0.26	0.57	0.16	0.97	-0.47	2.87	('6:35459332:35459646|35459489:+@6:35486742:35486972:+.A.coreAndExt_6:35459332:35459646|35459489:+@6:35486742:35486972:+.A.dn', '6:35459332:35459646|35459489:+@6:35486742:35486972:+.B.core_6:35459332:35459646|35459489:+@6:35486742:35486972:+.B.dn')	(0,0):194,(1,0):2,(1,1):24	0:3,1:23	(0,0):146,(1,0):4,(1,1):6	1904-01-01 00:10:00	6
A5SS	11:93869418:93869870|93869642:+@11:93870885:93872774:+	ENSG00000168876	0.94	0.82	1	0.73	0.58	0.9	0.21	2.85	('11:93869418:93869870|93869642:+@11:93870885:93872774:+.A.coreAndExt_11:93869418:93869870|93869642:+@11:93870885:93872774:+.A.dn', '11:93869418:93869870|93869642:+@11:93870885:93872774:+.B.core_11:93869418:93869870|93869642:+@11:93870885:93872774:+.B.dn')	(0,0):277,(1,0):75,(1,1):501	0:563,1:13	(0,0):147,(0,1):2,(1,0):50,(1,1):406	0:414,1:44	11
A5SS	12:27708562:27708646|27708637:+@12:27711366:27711520:+	ENSG00000110841	0.51	0.29	0.78	0.14	0	0.53	0.37	2.78	('12:27708562:27708646|27708637:+@12:27711366:27711520:+.A.coreAndExt_12:27708562:27708646|27708637:+@12:27711366:27711520:+.A.dn', '12:27708562:27708646|27708637:+@12:27711366:27711520:+.B.core_12:27708562:27708646|27708637:+@12:27711366:27711520:+.B.dn')	(0,0):113,(0,1):6,(1,0):8,(1,1):10	0:12,1:12	(0,0):129,(0,1):4,(1,1):5	0:1,1:8	12
A5SS	20:34288218:34288373|34288302:+@20:34291157:34292458:+	ENSG00000131043	0.05	0	0.21	0.29	0.13	0.49	-0.24	2.73	('20:34288218:34288373|34288302:+@20:34291157:34292458:+.A.coreAndExt_20:34288218:34288373|34288302:+@20:34291157:34292458:+.A.dn', '20:34288218:34288373|34288302:+@20:34291157:34292458:+.B.core_20:34288218:34288373|34288302:+@20:34291157:34292458:+.B.dn')	(0,0):84,(0,1):3,(1,1):220	0:20,1:203	(0,0):121,(0,1):4,(1,0):7,(1,1):304	0:49,1:266	20
A5SS	3:53129077:53128940|53128936:-@3:53120886:53120964:-	ENSG00000163933	0.37	0.2	0.55	0.13	0.05	0.27	0.24	2.72	('3:53129077:53128940|53128936:-@3:53120886:53120964:-.A.dn_3:53129077:53128940|53128936:-@3:53120886:53120964:-.A.coreAndExt', '3:53129077:53128940|53128936:-@3:53120886:53120964:-.B.dn_3:53129077:53128940|53128936:-@3:53120886:53120964:-.B.core')	(0,0):345,(0,1):14,(1,0):9,(1,1):9	0:13,1:19	(0,0):204,(0,1):24,(1,0):3,(1,1):3	0:3,1:27	3
A5SS	5:175542372:175542294|175542229:-@5:175540425:175540495:-	ENSG00000248596	0.13	0.04	0.27	0.4	0.21	0.67	-0.27	2.71	('5:175542372:175542294|175542229:-@5:175540425:175540495:-.A.dn_5:175542372:175542294|175542229:-@5:175540425:175540495:-.A.coreAndExt', '5:175542372:175542294|175542229:-@5:175540425:175540495:-.B.dn_5:175542372:175542294|175542229:-@5:175540425:175540495:-.B.core')	(0,0):1522,(0,1):9,(1,0):5	0:5,1:9	(0,0):575,(0,1):4,(1,0):13	0:13,1:4	5
A5SS	X:53241317:53241216|53241138:-@X:53240838:53240975:-	ENSG00000126012	0.45	0.34	0.57	0.67	0.51	0.82	-0.22	2.68	('X:53241317:53241216|53241138:-@X:53240838:53240975:-.A.dn_X:53241317:53241216|53241138:-@X:53240838:53240975:-.A.coreAndExt', 'X:53241317:53241216|53241138:-@X:53240838:53240975:-.B.dn_X:53241317:53241216|53241138:-@X:53240838:53240975:-.B.core')	(0,0):170,(0,1):18,(1,0):53,(1,1):30	0:65,1:36	(0,0):113,(0,1):8,(1,0):51,(1,1):13	0:61,1:11	X
A5SS	17:7404765:7404913|7404858:+@17:7405040:7405649:+	ENSG00000161955,ENSG00000239697,ENSG00000248871	0.21	0.05	0.57	0.55	0.31	0.85	-0.34	2.67	('17:7404765:7404913|7404858:+@17:7405040:7405649:+.A.coreAndExt_17:7404765:7404913|7404858:+@17:7405040:7405649:+.A.dn', '17:7404765:7404913|7404858:+@17:7405040:7405649:+.B.core_17:7404765:7404913|7404858:+@17:7405040:7405649:+.B.dn')	(0,0):53,(0,1):1,(1,0):2,(1,1):90	0:26,1:67	(0,0):53,(1,0):6,(1,1):71	0:34,1:43	17
A5SS	17:74589575:74590554|74589740:+@17:74590697:74590800:+	ENSG00000167280	0.2	0.1	0.32	0.57	0.26	0.93	-0.37	2.57	('17:74589575:74590554|74589740:+@17:74590697:74590800:+.A.coreAndExt_17:74589575:74590554|74589740:+@17:74590697:74590800:+.A.dn', '17:74589575:74590554|74589740:+@17:74590697:74590800:+.B.core_17:74589575:74590554|74589740:+@17:74590697:74590800:+.B.dn')	(0,0):48,(0,1):7,(1,0):54,(1,1):5	0:56,1:10	(0,0):40,(1,0):45,(1,1):4	0:47,1:2	17
A5SS	7:72057966:72057788|72057780:-@7:72057367:72057577:-	ENSG00000106133	0.82	0.55	0.97	0.33	0.03	0.79	0.49	2.55	('7:72057966:72057788|72057780:-@7:72057367:72057577:-.A.dn_7:72057966:72057788|72057780:-@7:72057367:72057577:-.A.coreAndExt', '7:72057966:72057788|72057780:-@7:72057367:72057577:-.B.dn_7:72057966:72057788|72057780:-@7:72057367:72057577:-.B.core')	(0,0):71,(1,0):4,(1,1):8	0:7,1:5	(0,0):35,(0,1):1,(1,1):6	0:0,1:7	7
A5SS	19:2302432:2302655|2302592:+@19:2303944:2306251:+	ENSG00000005206	0.21	0.05	0.5	0.69	0.27	0.99	-0.48	2.53	('19:2302432:2302655|2302592:+@19:2303944:2306251:+.A.coreAndExt_19:2302432:2302655|2302592:+@19:2303944:2306251:+.A.dn', '19:2302432:2302655|2302592:+@19:2303944:2306251:+.B.core_19:2302432:2302655|2302592:+@19:2303944:2306251:+.B.dn')	(0,0):19,(0,1):8,(1,0):2,(1,1):72	0:20,1:62	(0,0):20,(1,0):2,(1,1):27	0:19,1:10	19
A5SS	3:15601853:15601759|15601755:-@3:15599388:15599500:-	ENSG00000131373	0.1	0.01	0.29	0.52	0.11	0.89	-0.42	2.46	('3:15601853:15601759|15601755:-@3:15599388:15599500:-.A.dn_3:15601853:15601759|15601755:-@3:15599388:15599500:-.A.coreAndExt', '3:15601853:15601759|15601755:-@3:15599388:15599500:-.B.dn_3:15601853:15601759|15601755:-@3:15599388:15599500:-.B.core')	(0,0):145,(0,1):13,(1,1):2	0:0,1:15	(0,0):80,(1,1):2	0:1,1:1	3
A5SS	16:780526:782368|782348:+@16:782440:782595:+	ENSG00000127586	0.16	0.05	0.32	0.47	0.25	0.75	-0.31	2.44	('16:780526:782368|782348:+@16:782440:782595:+.A.coreAndExt_16:780526:782368|782348:+@16:782440:782595:+.A.dn', '16:780526:782368|782348:+@16:782440:782595:+.B.core_16:780526:782368|782348:+@16:782440:782595:+.B.dn')	(0,0):162,(0,1):17,(1,0):3,(1,1):280	0:45,1:255	(0,0):82,(0,1):5,(1,0):6,(1,1):190	0:136,1:65	16
A5SS	20:2587483:2587284|2587273:-@20:2587036:2587168:-	ENSG00000101365	0.39	0.18	0.67	0.76	0.45	0.93	-0.37	2.44	('20:2587483:2587284|2587273:-@20:2587036:2587168:-.A.dn_20:2587483:2587284|2587273:-@20:2587036:2587168:-.A.coreAndExt', '20:2587483:2587284|2587273:-@20:2587036:2587168:-.B.dn_20:2587483:2587284|2587273:-@20:2587036:2587168:-.B.core')	(0,0):517,(0,1):6,(1,0):7,(1,1):83	0:49,1:47	(0,0):495,(0,1):2,(1,0):13,(1,1):74	0:64,1:25	20
A5SS	9:139627888:139628042|139627937:+@9:139628254:139628487:+	ENSG00000197070	0.76	0.39	0.96	0.27	0.04	0.77	0.49	2.42	('9:139627888:139628042|139627937:+@9:139628254:139628487:+.A.coreAndExt_9:139627888:139628042|139627937:+@9:139628254:139628487:+.A.dn', '9:139627888:139628042|139627937:+@9:139628254:139628487:+.B.core_9:139627888:139628042|139627937:+@9:139628254:139628487:+.B.dn')	(0,0):68,(1,0):11,(1,1):8	0:18,1:1	(0,0):68,(1,0):2,(1,1):11	0:4,1:9	9
A5SS	13:19324330:19323829|19323495:-@13:19307617:19307829:-	ENSG00000132950	0.33	0.19	0.48	0.13	0.05	0.24	0.2	2.39	('13:19324330:19323829|19323495:-@13:19307617:19307829:-.A.dn_13:19324330:19323829|19323495:-@13:19307617:19307829:-.A.coreAndExt', '13:19324330:19323829|19323495:-@13:19307617:19307829:-.B.dn_13:19324330:19323829|19323495:-@13:19307617:19307829:-.B.core')	(0,0):365,(0,1):1,(1,0):22,(1,1):74	0:43,1:54	(0,0):268,(0,1):1,(1,0):7,(1,1):67	0:20,1:55	13
A5SS	3:9412263:9412229|9412190:-@3:9406573:9408510:-	ENSG00000206573	0.13	0.02	0.46	0.42	0.2	0.7	-0.29	2.37	('3:9412263:9412229|9412190:-@3:9406573:9408510:-.A.dn_3:9412263:9412229|9412190:-@3:9406573:9408510:-.A.coreAndExt', '3:9412263:9412229|9412190:-@3:9406573:9408510:-.B.dn_3:9412263:9412229|9412190:-@3:9406573:9408510:-.B.core')	(0,0):539,(1,0):1,(1,1):891	0:85,1:807	(0,0):386,(1,0):5,(1,1):553	0:189,1:369	3
A5SS	2:215935047:215934937|215934933:-@2:215932877:215934594:-	ENSG00000115414	0.6	0.07	0.98	0.39	0.02	0.85	0.21	2.36	('2:215935047:215934937|215934933:-@2:215932877:215934594:-.A.dn_2:215935047:215934937|215934933:-@2:215932877:215934594:-.A.coreAndExt', '2:215935047:215934937|215934933:-@2:215932877:215934594:-.B.dn_2:215935047:215934937|215934933:-@2:215932877:215934594:-.B.core')	(0,0):9,(1,1):11	0:10,1:1	(0,0):8,(1,1):24	0:2,1:22	2
A5SS	22:17020325:17020626|17020587:+@22:17022939:17023035:+	ENSG00000184979	0.17	0.05	0.38	0.49	0.17	0.8	-0.32	2.34	('22:17020325:17020626|17020587:+@22:17022939:17023035:+.A.coreAndExt_22:17020325:17020626|17020587:+@22:17022939:17023035:+.A.dn', '22:17020325:17020626|17020587:+@22:17022939:17023035:+.B.core_22:17020325:17020626|17020587:+@22:17022939:17023035:+.B.dn')	(0,0):24,(0,1):8,(1,0):2,(1,1):21	0:2,1:29	(0,0):54,(0,1):3,(1,0):4,(1,1):10	0:9,1:8	22
A5SS	15:98089735:98089446|98089086:-@15:98088901:98088926:-	ENSG00000183060	0.61	0.23	0.95	0.21	0.06	0.48	0.4	2.31	('15:98089735:98089446|98089086:-@15:98088901:98088926:-.A.dn_15:98089735:98089446|98089086:-@15:98088901:98088926:-.A.coreAndExt', '15:98089735:98089446|98089086:-@15:98088901:98088926:-.B.dn_15:98089735:98089446|98089086:-@15:98088901:98088926:-.B.core')	(0,0):15,(1,0):7,(1,1):3	0:8,1:2	(0,0):11,(1,0):8,(1,1):8	0:9,1:7	15
A5SS	6:108309147:108309046|108309042:-@6:108304461:108304559:-	ENSG00000025796	0.22	0.11	0.38	0.6	0.21	0.94	-0.38	2.31	('6:108309147:108309046|108309042:-@6:108304461:108304559:-.A.dn_6:108309147:108309046|108309042:-@6:108304461:108304559:-.A.coreAndExt', '6:108309147:108309046|108309042:-@6:108304461:108304559:-.B.dn_6:108309147:108309046|108309042:-@6:108304461:108304559:-.B.core')	(0,0):470,(0,1):21,(1,0):6,(1,1):1	0:6,1:22	(0,0):196,(0,1):1,(1,0):2	0:2,1:1	6
A5SS	17:25642652:25642455|25642453:-@17:25640517:25640626:-	ENSG00000108578	0.35	0.22	0.49	0.15	0.06	0.27	0.2	2.3	('17:25642652:25642455|25642453:-@17:25640517:25640626:-.A.dn_17:25642652:25642455|25642453:-@17:25640517:25640626:-.A.coreAndExt', '17:25642652:25642455|25642453:-@17:25640517:25640626:-.B.dn_17:25642652:25642455|25642453:-@17:25640517:25640626:-.B.core')	(0,0):154,(0,1):28,(1,0):15,(1,1):54	0:40,1:57	(0,0):162,(0,1):36,(1,0):6,(1,1):41	0:13,1:70	17
A5SS	7:100049036:100049269|100049265:+@7:100050426:100050590:+	ENSG00000106330	0.74	0.22	0.99	0.3	0.03	0.76	0.44	2.3	('7:100049036:100049269|100049265:+@7:100050426:100050590:+.A.coreAndExt_7:100049036:100049269|100049265:+@7:100050426:100050590:+.A.dn', '7:100049036:100049269|100049265:+@7:100050426:100050590:+.B.core_7:100049036:100049269|100049265:+@7:100050426:100050590:+.B.dn')	(0,0):31,(1,0):2,(1,1):14	0:13,1:3	(0,0):28,(0,1):2,(1,1):14	0:0,1:16	7
A5SS	14:92720811:92720657|92720653:-@14:92718294:92720460:-	ENSG00000165943	0.45	0.31	0.62	0.23	0.11	0.36	0.22	2.29	('14:92720811:92720657|92720653:-@14:92718294:92720460:-.A.dn_14:92720811:92720657|92720653:-@14:92718294:92720460:-.A.coreAndExt', '14:92720811:92720657|92720653:-@14:92718294:92720460:-.B.dn_14:92720811:92720657|92720653:-@14:92718294:92720460:-.B.core')	(0,0):49,(0,1):19,(1,0):16,(1,1):974	0:502,1:507	(0,0):43,(0,1):24,(1,0):6,(1,1):642	0:200,1:472	14
A5SS	14:64613899:64613815|64613799:-@14:64611593:64613134:-	ENSG00000125952	0.4	0.23	0.63	0.14	0	0.33	0.26	2.28	('14:64613899:64613815|64613799:-@14:64611593:64613134:-.A.dn_14:64613899:64613815|64613799:-@14:64611593:64613134:-.A.coreAndExt', '14:64613899:64613815|64613799:-@14:64611593:64613134:-.B.dn_14:64613899:64613815|64613799:-@14:64611593:64613134:-.B.core')	(0,0):327,(0,1):5,(1,0):10,(1,1):1430	0:763,1:682	(0,0):179,(0,1):1,(1,0):1,(1,1):1105	0:27,1:1080	14
A5SS	3:144222882:144222917|144222914:+@3:144223005:144223087:+	ENSG00000163714	0.75	0.24	0.97	0.37	0.06	0.76	0.38	2.28	('3:144222882:144222917|144222914:+@3:144223005:144223087:+.A.coreAndExt_3:144222882:144222917|144222914:+@3:144223005:144223087:+.A.dn', '3:144222882:144222917|144222914:+@3:144223005:144223087:+.B.core_3:144222882:144222917|144222914:+@3:144223005:144223087:+.B.dn')	(0,0):288,(1,0):4	1904-01-01 00:04:00	(0,0):261,(0,1):2,(1,0):1	0:1,1:2	3
A5SS	X:100241454:100241710|100241575:+@X:100242703:100242941:+	ENSG00000102384	0.59	0.28	0.89	0.26	0.12	0.45	0.33	2.23	('X:100241454:100241710|100241575:+@X:100242703:100242941:+.A.coreAndExt_X:100241454:100241710|100241575:+@X:100242703:100242941:+.A.dn', 'X:100241454:100241710|100241575:+@X:100242703:100242941:+.B.core_X:100241454:100241710|100241575:+@X:100242703:100242941:+.B.dn')	(0,0):52,(0,1):1,(1,0):14,(1,1):17	0:28,1:4	(0,0):55,(0,1):1,(1,0):8,(1,1):28	0:14,1:23	X
A5SS	1:153554584:153554747|153554706:+@1:153555271:153555343:+	ENSG00000160752	0.57	0.29	0.9	0.24	0.08	0.52	0.33	2.21	('1:153554584:153554747|153554706:+@1:153555271:153555343:+.A.coreAndExt_1:153554584:153554747|153554706:+@1:153555271:153555343:+.A.dn', '1:153554584:153554747|153554706:+@1:153555271:153555343:+.B.core_1:153554584:153554747|153554706:+@1:153555271:153555343:+.B.dn')	(0,0):628,(1,0):8,(1,1):15	0:19,1:4	(0,0):697,(1,0):5,(1,1):24	0:8,1:21	1
A5SS	11:124477915:124477840|124477743:-@11:124477238:124477457:-	ENSG00000150433	0.26	0.04	0.71	0.67	0.33	0.97	-0.41	2.21	('11:124477915:124477840|124477743:-@11:124477238:124477457:-.A.dn_11:124477915:124477840|124477743:-@11:124477238:124477457:-.A.coreAndExt', '11:124477915:124477840|124477743:-@11:124477238:124477457:-.B.dn_11:124477915:124477840|124477743:-@11:124477238:124477457:-.B.core')	(0,0):83,(1,0):1,(1,1):6	0:1,1:6	(0,0):80,(0,1):1,(1,0):6,(1,1):2	0:7,1:2	11
A5SS	4:651645:651795|651730:+@4:653835:654571:+	ENSG00000133256	0.39	0.09	0.9	0.84	0.5	0.99	-0.45	2.18	('4:651645:651795|651730:+@4:653835:654571:+.A.coreAndExt_4:651645:651795|651730:+@4:653835:654571:+.A.dn', '4:651645:651795|651730:+@4:653835:654571:+.B.core_4:651645:651795|651730:+@4:653835:654571:+.B.dn')	(0,0):11,(1,0):1,(1,1):28	0:12,1:17	(0,0):13,(1,0):5,(1,1):9	0:13,1:1	4
A5SS	5:88235511:88235776|88235733:+@5:88236782:88236843:+	ENSG00000248309	0.81	0.52	0.98	0.45	0.08	0.81	0.36	2.18	('5:88235511:88235776|88235733:+@5:88236782:88236843:+.A.coreAndExt_5:88235511:88235776|88235733:+@5:88236782:88236843:+.A.dn', '5:88235511:88235776|88235733:+@5:88236782:88236843:+.B.core_5:88235511:88235776|88235733:+@5:88236782:88236843:+.B.dn')	(0,0):103,(1,0):6,(1,1):2	1904-01-01 00:08:00	(0,0):56,(0,1):1,(1,0):1,(1,1):2	0:3,1:1	5
A5SS	8:42026382:42026295|42026251:-@8:42025053:42025977:-	ENSG00000083168	0.53	0.34	0.73	0.8	0.62	0.95	-0.27	2.18	('8:42026382:42026295|42026251:-@8:42025053:42025977:-.A.dn_8:42026382:42026295|42026251:-@8:42025053:42025977:-.A.coreAndExt', '8:42026382:42026295|42026251:-@8:42025053:42025977:-.B.dn_8:42026382:42026295|42026251:-@8:42025053:42025977:-.B.core')	(0,0):142,(0,1):3,(1,0):17,(1,1):410	0:164,1:266	(0,0):103,(0,1):1,(1,0):22,(1,1):277	0:245,1:55	8
A5SS	3:69144640:69144444|69144356:-@3:69143777:69143832:-	ENSG00000163378	0.47	0.27	0.74	0.79	0.5	0.97	-0.32	2.17	('3:69144640:69144444|69144356:-@3:69143777:69143832:-.A.dn_3:69144640:69144444|69144356:-@3:69143777:69143832:-.A.coreAndExt', '3:69144640:69144444|69144356:-@3:69143777:69143832:-.B.dn_3:69144640:69144444|69144356:-@3:69143777:69143832:-.B.core')	(0,0):82,(0,1):2,(1,0):17,(1,1):20	0:26,1:13	(0,0):35,(1,0):16,(1,1):9	1904-01-01 00:25:00	3
A5SS	19:10307652:10307347|10306742:-@19:10306204:10306458:-	ENSG00000076662	0.45	0.38	0.54	0.72	0.5	0.91	-0.27	2.16	('19:10307652:10307347|10306742:-@19:10306204:10306458:-.A.dn_19:10307652:10307347|10306742:-@19:10306204:10306458:-.A.coreAndExt', '19:10307652:10307347|10306742:-@19:10306204:10306458:-.B.dn_19:10307652:10307347|10306742:-@19:10306204:10306458:-.B.core')	(0,0):322,(0,1):5,(1,0):249,(1,1):186	0:320,1:120	(0,0):48,(0,1):1,(1,0):49,(1,1):17	0:59,1:8	19
A5SS	11:32395776:32395699|32395546:-@11:32394612:32394662:-	ENSG00000184937	0.23	0.01	0.75	0.58	0.13	0.98	-0.35	2.15	('11:32395776:32395699|32395546:-@11:32394612:32394662:-.A.dn_11:32395776:32395699|32395546:-@11:32394612:32394662:-.A.coreAndExt', '11:32395776:32395699|32395546:-@11:32394612:32394662:-.B.dn_11:32395776:32395699|32395546:-@11:32394612:32394662:-.B.core')	(0,0):46,(0,1):1,(1,0):1	0:1,1:1	(0,0):29,(1,0):2	1904-01-01 00:02:00	11
A5SS	22:41863248:41863031|41863027:-@22:41858156:41859436:-	ENSG00000100294	0.12	0.01	0.36	0.43	0.2	0.66	-0.31	2.15	('22:41863248:41863031|41863027:-@22:41858156:41859436:-.A.dn_22:41863248:41863031|41863027:-@22:41858156:41859436:-.A.coreAndExt', '22:41863248:41863031|41863027:-@22:41858156:41859436:-.B.dn_22:41863248:41863031|41863027:-@22:41858156:41859436:-.B.core')	(0,0):171,(0,1):9,(1,1):108	0:13,1:104	(0,0):123,(0,1):9,(1,0):7,(1,1):151	0:101,1:66	22
A5SS	3:58874630:58874474|58874464:-@3:58845311:58845475:-	ENSG00000163689	0.26	0.01	0.7	0.7	0.26	0.97	-0.44	2.14	('3:58874630:58874474|58874464:-@3:58845311:58845475:-.A.dn_3:58874630:58874474|58874464:-@3:58845311:58845475:-.A.coreAndExt', '3:58874630:58874474|58874464:-@3:58845311:58845475:-.B.dn_3:58874630:58874474|58874464:-@3:58845311:58845475:-.B.core')	(0,0):94,(0,1):2,(1,1):1	0:1,1:2	(0,0):191,(1,0):1,(1,1):1	0:1,1:1	3
A5SS	4:184603682:184603812|184603781:+@4:184604235:184607209:+	ENSG00000168564	0.51	0.37	0.66	0.74	0.57	0.87	-0.23	2.14	('4:184603682:184603812|184603781:+@4:184604235:184607209:+.A.coreAndExt_4:184603682:184603812|184603781:+@4:184604235:184607209:+.A.dn', '4:184603682:184603812|184603781:+@4:184604235:184607209:+.B.core_4:184603682:184603812|184603781:+@4:184604235:184607209:+.B.dn')	(0,0):154,(0,1):15,(1,0):23,(1,1):1169	0:614,1:593	(0,0):118,(0,1):6,(1,0):28,(1,1):917	0:753,1:198	4
A5SS	11:118387141:118387231|118387203:+@11:118387859:118388174:+	ENSG00000186166	0.83	0.51	0.99	0.47	0.12	0.92	0.36	2.13	('11:118387141:118387231|118387203:+@11:118387859:118388174:+.A.coreAndExt_11:118387141:118387231|118387203:+@11:118387859:118388174:+.A.dn', '11:118387141:118387231|118387203:+@11:118387859:118388174:+.B.core_11:118387141:118387231|118387203:+@11:118387859:118388174:+.B.dn')	(0,0):44,(1,0):6,(1,1):9	0:14,1:1	(0,0):26,(1,1):2	0:0,1:2	11
A5SS	19:45023267:45023136|45023097:-@19:45022894:45022995:-	ENSG00000105202	0.66	0.32	0.97	0.23	0.02	0.73	0.43	2.12	('19:45023267:45023136|45023097:-@19:45022894:45022995:-.A.dn_19:45023267:45023136|45023097:-@19:45022894:45022995:-.A.coreAndExt', '19:45023267:45023136|45023097:-@19:45022894:45022995:-.B.dn_19:45023267:45023136|45023097:-@19:45022894:45022995:-.B.core')	(0,0):597,(1,0):8,(1,1):17	0:19,1:6	(0,0):250,(1,0):1,(1,1):9	0:3,1:7	19
A5SS	1:95482355:95482842|95482795:+@1:95484686:95484801:+	ENSG00000122481	0.92	0.73	0.99	0.65	0.45	0.86	0.27	2.11	('1:95482355:95482842|95482795:+@1:95484686:95484801:+.A.coreAndExt_1:95482355:95482842|95482795:+@1:95484686:95484801:+.A.dn', '1:95482355:95482842|95482795:+@1:95484686:95484801:+.B.core_1:95482355:95482842|95482795:+@1:95484686:95484801:+.B.dn')	(0,0):198,(1,0):23,(1,1):82	0:80,1:25	(0,0):161,(0,1):3,(1,0):18,(1,1):67	0:55,1:33	1
A5SS	1:51747031:51746949|51746945:-@1:51745796:51745917:-	ENSG00000085832	0.64	0.21	0.91	0.34	0.06	0.86	0.3	2.1	('1:51747031:51746949|51746945:-@1:51745796:51745917:-.A.dn_1:51747031:51746949|51746945:-@1:51745796:51745917:-.A.coreAndExt', '1:51747031:51746949|51746945:-@1:51745796:51745917:-.B.dn_1:51747031:51746949|51746945:-@1:51745796:51745917:-.B.core')	(0,0):101,(1,0):1,(1,1):1	0:1,1:1	(0,0):72,(0,1):1	0:0,1:1	1
A5SS	10:99188450:99188417|99188410:-@10:99186938:99187497:-	ENSG00000171311	0.68	0.24	0.96	0.24	0.01	0.72	0.44	2.1	('10:99188450:99188417|99188410:-@10:99186938:99187497:-.A.dn_10:99188450:99188417|99188410:-@10:99186938:99187497:-.A.coreAndExt', '10:99188450:99188417|99188410:-@10:99186938:99187497:-.B.dn_10:99188450:99188417|99188410:-@10:99186938:99187497:-.B.core')	(0,0):109,(1,1):5	0:4,1:1	(0,0):91,(1,1):5	0:1,1:4	10
A5SS	1:89298595:89298468|89298442:-@1:89297162:89297697:-	ENSG00000117228	0.4	0.1	0.84	0.07	0	0.23	0.33	2.06	('1:89298595:89298468|89298442:-@1:89297162:89297697:-.A.dn_1:89298595:89298468|89298442:-@1:89297162:89297697:-.A.coreAndExt', '1:89298595:89298468|89298442:-@1:89297162:89297697:-.B.dn_1:89298595:89298468|89298442:-@1:89297162:89297697:-.B.core')	(0,0):16,(0,1):2,(1,0):1,(1,1):2	0:2,1:3	(0,0):60,(0,1):8,(1,1):15	0:2,1:21	1
A5SS	11:763629:763522|763428:-@11:762427:762521:-	ENSG00000177225	0.06	0.01	0.17	0.35	0.11	0.68	-0.29	2.06	('11:763629:763522|763428:-@11:762427:762521:-.A.dn_11:763629:763522|763428:-@11:762427:762521:-.A.coreAndExt', '11:763629:763522|763428:-@11:762427:762521:-.B.dn_11:763629:763522|763428:-@11:762427:762521:-.B.core')	(0,0):140,(0,1):10,(1,0):1,(1,1):3	0:1,1:13	(0,0):105,(0,1):3,(1,0):4,(1,1):1	0:4,1:4	11
A5SS	15:58475918:58475864|58475642:-@15:58464350:58465577:-	ENSG00000182718	0.38	0.09	0.8	0.79	0.4	0.98	-0.41	2.06	('15:58475918:58475864|58475642:-@15:58464350:58465577:-.A.dn_15:58475918:58475864|58475642:-@15:58464350:58465577:-.A.coreAndExt', '15:58475918:58475864|58475642:-@15:58464350:58465577:-.B.dn_15:58475918:58475864|58475642:-@15:58464350:58465577:-.B.core')	(0,0):277,(1,0):2,(1,1):27	0:11,1:18	(0,0):299,(1,0):8,(1,1):26	0:33,1:1	15
A5SS	17:72053207:72055049|72053313:+@17:72060786:72061263:+	NA	0.23	0.03	0.69	0.71	0.24	0.97	-0.48	2.05	('17:72053207:72055049|72053313:+@17:72060786:72061263:+.A.coreAndExt_17:72053207:72055049|72053313:+@17:72060786:72061263:+.A.dn', '17:72053207:72055049|72053313:+@17:72060786:72061263:+.B.core_17:72053207:72055049|72053313:+@17:72060786:72061263:+.B.dn')	(0,0):37,(1,0):2,(1,1):3	0:2,1:3	(0,0):48,(1,0):10	1904-01-01 00:10:00	17
A5SS	10:97905073:97905145|97905123:+@10:97905671:97905794:+	ENSG00000177853	0.44	0.17	0.8	0.12	0	0.49	0.32	2.02	('10:97905073:97905145|97905123:+@10:97905671:97905794:+.A.coreAndExt_10:97905073:97905145|97905123:+@10:97905671:97905794:+.A.dn', '10:97905073:97905145|97905123:+@10:97905671:97905794:+.B.core_10:97905073:97905145|97905123:+@10:97905671:97905794:+.B.dn')	(0,0):75,(0,1):2,(1,0):2,(1,1):2	0:3,1:3	(0,0):56,(0,1):4	0:0,1:4	10
A5SS	16:1809225:1809117|1809113:-@16:1807143:1807273:-	ENSG00000063854	0.13	0.01	0.4	0.51	0.17	0.93	-0.38	2.02	('16:1809225:1809117|1809113:-@16:1807143:1807273:-.A.dn_16:1809225:1809117|1809113:-@16:1807143:1807273:-.A.coreAndExt', '16:1809225:1809117|1809113:-@16:1807143:1807273:-.B.dn_16:1809225:1809117|1809113:-@16:1807143:1807273:-.B.core')	(0,0):76,(0,1):7	0:0,1:7	(0,0):46,(0,1):1,(1,0):2,(1,1):2	0:2,1:3	16
A5SS	16:31103761:31104005|31104001:+@16:31105624:31105658:+	ENSG00000089280	0.49	0.17	0.83	0.19	0	0.61	0.3	2.02	('16:31103761:31104005|31104001:+@16:31105624:31105658:+.A.coreAndExt_16:31103761:31104005|31104001:+@16:31105624:31105658:+.A.dn', '16:31103761:31104005|31104001:+@16:31105624:31105658:+.B.core_16:31103761:31104005|31104001:+@16:31105624:31105658:+.B.dn')	(0,0):561,(0,1):2,(1,0):3,(1,1):40	0:31,1:14	(0,0):382,(0,1):3,(1,1):25	0:0,1:28	16
A5SS	X:106072107:106071862|106071824:-@X:106070620:106071518:-	ENSG00000133131,ENSG00000196333	0.24	0.04	0.6	0.65	0.23	0.98	-0.41	2.02	('X:106072107:106071862|106071824:-@X:106070620:106071518:-.A.dn_X:106072107:106071862|106071824:-@X:106070620:106071518:-.A.coreAndExt', 'X:106072107:106071862|106071824:-@X:106070620:106071518:-.B.dn_X:106072107:106071862|106071824:-@X:106070620:106071518:-.B.core')	(0,0):13,(0,1):5,(1,0):1,(1,1):34	0:4,1:36	(0,0):9,(1,0):2,(1,1):30	0:26,1:6	X
A5SS	19:54530783:54530855|54530837:+@19:54531978:54532102:+	ENSG00000104894	0.92	0.73	0.99	0.52	0.07	0.92	0.4	2.01	('19:54530783:54530855|54530837:+@19:54531978:54532102:+.A.coreAndExt_19:54530783:54530855|54530837:+@19:54531978:54532102:+.A.dn', '19:54530783:54530855|54530837:+@19:54531978:54532102:+.B.core_19:54530783:54530855|54530837:+@19:54531978:54532102:+.B.dn')	(0,0):173,(1,0):19,(1,1):3	1904-01-01 00:22:00	(0,0):43,(1,0):1	1904-01-01 00:01:00	19
A5SS	7:142672207:142672311|142672307:+@7:142672476:142672511:+	ENSG00000197448	0.25	0.01	0.66	0.63	0.1	0.91	-0.38	2.01	('7:142672207:142672311|142672307:+@7:142672476:142672511:+.A.coreAndExt_7:142672207:142672311|142672307:+@7:142672476:142672511:+.A.dn', '7:142672207:142672311|142672307:+@7:142672476:142672511:+.B.core_7:142672207:142672311|142672307:+@7:142672476:142672511:+.B.dn')	(0,0):177,(0,1):2	0:0,1:2	(0,0):98,(1,0):1	1904-01-01 00:01:00	7
A5SS	1:153909146:153908936|153908687:-@1:153906735:153906879:-	ENSG00000163374	0.56	0.36	0.81	0.3	0.17	0.49	0.26	2	('1:153909146:153908936|153908687:-@1:153906735:153906879:-.A.dn_1:153909146:153908936|153908687:-@1:153906735:153906879:-.A.coreAndExt', '1:153909146:153908936|153908687:-@1:153906735:153906879:-.B.dn_1:153909146:153908936|153908687:-@1:153906735:153906879:-.B.core')	(0,0):317,(1,0):38,(1,1):24	0:51,1:11	(0,0):274,(1,0):21,(1,1):27	0:29,1:19	1
A5SS	13:76611472:76611332|76611321:-@13:76601292:76601366:-	ENSG00000005810	0.38	0.14	0.67	0.71	0.23	0.96	-0.33	2	('13:76611472:76611332|76611321:-@13:76601292:76601366:-.A.dn_13:76611472:76611332|76611321:-@13:76601292:76601366:-.A.coreAndExt', '13:76611472:76611332|76611321:-@13:76601292:76601366:-.B.dn_13:76611472:76611332|76611321:-@13:76601292:76601366:-.B.core')	(0,0):377,(0,1):4,(1,0):2,(1,1):4	0:2,1:8	(0,0):281,(1,0):2,(1,1):1	1904-01-01 00:03:00	13
AFE	145508@uc001xuy.1@uc001xux.1	ENSG00000100629	0.48	0.4	0.56	0.17	0.1	0.25	0.31	1000000000000	('8379@uc003sld.1@uc003slh.1uc010ksj.1.A.1_8379@uc003sld.1@uc003slh.1uc010ksj.1.A.0', '8379@uc003sld.1@uc003slh.1uc010ksj.1.B.2_8379@uc003sld.1@uc003slh.1uc010ksj.1.B.1_8379@uc003sld.1@uc003slh.1uc010ksj.1.B.0')	(0,0):1705,(0,1):47,(1,0):137	0:137,1:47	(0,0):1622,(0,1):35,(1,0):21	0:21,1:35	7
AFE	153129@uc003jqd.1@uc003jqf.1	ENSG00000177058	0.55	0.48	0.64	0.19	0.12	0.29	0.36	1000000000000	('8379@uc003sld.1@uc003slf.1.A.1_8379@uc003sld.1@uc003slf.1.A.0', '8379@uc003sld.1@uc003slf.1.B.2_8379@uc003sld.1@uc003slf.1.B.1_8379@uc003sld.1@uc003slf.1.B.0')	(0,0):1709,(0,1):43,(1,0):137	0:137,1:43	(0,0):1620,(0,1):37,(1,0):21	0:21,1:37	7
AFE	3145@uc001pvc.1@uc001pvf.1	ENSG00000256269	0.33	0.29	0.37	0.07	0.06	0.09	0.26	1000000000000	('4439@uc003nwy.1@uc003rjk.1.A.0', '4439@uc003nwy.1@uc003rjk.1.B.0')	(0,0):753227,(0,1):325,(1,0):158	0:158,1:325	(0,0):545806,(0,1):1012,(1,0):76	0:76,1:1012	6
AFE	4054@uc001oef.1@uc001oeh.1	ENSG00000168056	0.42	0.39	0.44	0.17	0.15	0.18	0.25	1000000000000	('3304@uc003rjw.2@uc003sbt.2.B.0', '3304@uc003rjw.2@uc003sbt.2.A.0')	(0,0):55659,(0,1):854,(1,0):607	0:607,1:854	(0,0):31724,(0,1):1727,(1,0):344	0:344,1:1727	6
AFE	132160@uc003ddh.2@uc003ddf.2uc010hmd.1	ENSG00000164088	0.55	0.46	0.64	0.19	0.12	0.29	0.36	1.40419e+10	('8379@uc003sld.1@uc003slg.1.A.1_8379@uc003sld.1@uc003slg.1.A.0', '8379@uc003sld.1@uc003slg.1.B.2_8379@uc003sld.1@uc003slg.1.B.1_8379@uc003sld.1@uc003slg.1.B.0')	(0,0):1717,(0,1):35,(1,0):137	0:137,1:35	(0,0):1628,(0,1):29,(1,0):21	0:21,1:29	7
AFE	3305@uc010kqi.1@uc010jte.1	ENSG00000222248,ENSG00000137267,ENSG00000218472,ENSG00000260604,ENSG00000230648,ENSG00000237716,ENSG00000231811,ENSG00000260673,ENSG00000236336,ENSG00000220685,ENSG00000265083,ENSG00000264541,ENSG00000220446,ENSG00000218574,ENSG00000217239,ENSG00000216360,ENSG00000230770,ENSG00000239472,ENSG00000124785,ENSG00000241216,ENSG00000261211,ENSG00000224532,ENSG00000219986,ENSG00000240936,ENSG00000251762…	0.43	0.32	0.55	0.78	0.69	0.86	-0.35	2.27135e+07	('3305@uc010kna.1@uc010jte.1.B.1_3305@uc010kna.1@uc010jte.1.B.0', '3305@uc010kna.1@uc010jte.1.A.1_3305@uc010kna.1@uc010jte.1.A.0')	(0,0):756506,(0,1):36,(1,0):27	0:27,1:36	(0,0):548019,(0,1):19,(1,0):68	0:68,1:19	6
AFE	27343@uc001ktg.1uc001kth.1@uc001ktl.1	ENSG00000166169	0.88	0.71	0.98	0.44	0.27	0.62	0.44	129687	('2217@uc002poi.1@uc002pof.1.B.0', '2217@uc002poi.1@uc002pof.1.A.0')	(0,0):187,(0,1):1,(1,0):78	0:78,1:1	(0,0):117,(0,1):8,(1,0):32	0:32,1:8	19
AFE	9659@uc001eme.1@uc001elo.2uc001emh.2uc001emk.2	ENSG00000178104	0.09	0.03	0.22	0.48	0.29	0.7	-0.39	34855.1	('10411@uc001rpw.1@uc001rpx.1.A.2_10411@uc001rpw.1@uc001rpx.1.A.1_10411@uc001rpw.1@uc001rpx.1.A.0', '10411@uc001rpw.1@uc001rpx.1.B.1_10411@uc001rpw.1@uc001rpx.1.B.0')	(0,0):38,(0,1):24,(1,0):2	0:2,1:24	(0,0):32,(0,1):13,(1,0):12	0:12,1:13	12
AFE	56996@uc003uwt.1@uc003uwq.2	ENSG00000146828	0.11	0.02	0.26	0.77	0.46	0.97	-0.66	4376.63	('4054@uc001oeg.1@uc001oeh.1.B.0', '4054@uc001oeg.1@uc001oeh.1.A.6_4054@uc001oeg.1@uc001oeh.1.A.5_4054@uc001oeg.1@uc001oeh.1.A.4_4054@uc001oeg.1@uc001oeh.1.A.3_4054@uc001oeg.1@uc001oeh.1.A.2_4054@uc001oeg.1@uc001oeh.1.A.1_4054@uc001oeg.1@uc001oeh.1.A.0')	(0,0):44,(0,1):13,(1,0):1	0:1,1:13	(0,0):55,(0,1):1,(1,0):6	0:6,1:1	11
AFE	23224@uc001xgt.1@uc010apx.1	ENSG00000054654	0.26	0.2	0.34	0.67	0.46	0.85	-0.41	3716.71	('56945@uc003ete.1@uc003etb.1uc003etd.1.B.0', '56945@uc003ete.1@uc003etb.1uc003etd.1.A.0')	(0,0):272,(0,1):38,(1,0):88	0:88,1:38	(0,0):157,(0,1):5,(1,0):67	0:67,1:5	3
AFE	23224@uc010aqa.1@uc010apx.1	ENSG00000054654	0.85	0.65	0.96	0.39	0.21	0.59	0.46	986.42	('1894@uc003fim.1@uc003fij.1.A.0_1894@uc003fim.1@uc003fij.1.A.1', '1894@uc003fim.1@uc003fij.1.B.0')	(0,0):2084,(0,1):2,(1,0):35	0:35,1:2	(0,0):1581,(0,1):11,(1,0):15	0:15,1:11	3
AFE	9659@uc001emf.1@uc001eln.2uc001elx.2	ENSG00000178104	0.37	0.22	0.56	0.9	0.66	0.99	-0.53	935.03	('89910@uc001tot.1@uc001tol.1uc001ton.2uc001toq.1.B.0_89910@uc001tot.1@uc001tol.1uc001ton.2uc001toq.1.B.1_89910@uc001tot.1@uc001tol.1uc001ton.2uc001toq.1.B.2', '89910@uc001tot.1@uc001tol.1uc001ton.2uc001toq.1.A.0')	(0,0):1433,(0,1):9,(1,0):56	0:56,1:9	(0,0):1181,(1,0):46	1904-01-01 00:46:00	12
AFE	4595@uc009vxn.1@uc001cnm.1uc001cnl.1uc009vxp.1uc001cnn.1	ENSG00000132781	0.01	0	0.04	0.21	0.09	0.34	-0.2	851.48	('7148@uc003nzg.1@uc010jts.1.A.0', '7148@uc003nzg.1@uc010jts.1.B.4_7148@uc003nzg.1@uc010jts.1.B.3_7148@uc003nzg.1@uc010jts.1.B.2_7148@uc003nzg.1@uc010jts.1.B.1_7148@uc003nzg.1@uc010jts.1.B.0')	(0,0):686,(0,1):48	0:0,1:48	(0,0):678,(0,1):20,(1,0):8	0:8,1:20	6
AFE	6326@uc010fpg.1@uc002udc.1	ENSG00000233204,ENSG00000136531	0.4	0.34	0.47	0.64	0.53	0.73	-0.24	416.64	('10626@uc002gox.1@uc002goy.1.B.0', '10626@uc002gox.1@uc002goy.1.A.3_10626@uc002gox.1@uc002goy.1.A.2_10626@uc002gox.1@uc002goy.1.A.1_10626@uc002gox.1@uc002goy.1.A.0')	(0,0):516,(0,1):96,(1,0):82	0:82,1:96	(0,0):402,(0,1):29,(1,0):65	0:65,1:29	17
AFE	64333@uc001snz.1@uc001sob.1	ENSG00000123329	0.33	0.27	0.39	0.56	0.45	0.66	-0.23	303.56	('10626@uc002gor.1@uc002goy.1.B.0', '10626@uc002gor.1@uc002goy.1.A.0')	(0,0):516,(0,1):96,(1,0):82	0:82,1:96	(0,0):402,(0,1):29,(1,0):65	0:65,1:29	17
AFE	440193@uc001xzi.1@uc010aty.1uc001xzl.2	ENSG00000015133	0.83	0.68	0.96	0.43	0.25	0.62	0.4	203.61	('84947@uc010kjq.1@uc003qrb.1.B.9_84947@uc010kjq.1@uc003qrb.1.B.8_84947@uc010kjq.1@uc003qrb.1.B.7_84947@uc010kjq.1@uc003qrb.1.B.6_84947@uc010kjq.1@uc003qrb.1.B.5_84947@uc010kjq.1@uc003qrb.1.B.4_84947@uc010kjq.1@uc003qrb.1.B.3_84947@uc010kjq.1@uc003qrb.1.B.2_84947@uc010kjq.1@uc003qrb.1.B.1_84947@uc010kjq.1@uc003qrb.1.B.0', '84947@uc010kjq.1@uc003qrb.1.A.0')	(0,0):333,(0,1):2,(1,0):36	0:36,1:2	(0,0):280,(0,1):9,(1,0):16	0:16,1:9	6
AFE	23191@uc001yuv.1@uc001yut.1	ENSG00000068793	0.6	0.38	0.81	0.2	0.12	0.32	0.4	188.15	('4820@uc003clq.1@uc003cll.1uc003clo.1.A.0', '4820@uc003clq.1@uc003cll.1uc003clo.1.B.0_4820@uc003clq.1@uc003cll.1uc003clo.1.B.1')	(0,0):1110,(0,1):3,(1,0):507	0:507,1:3	(0,0):775,(0,1):9,(1,0):258	0:258,1:9	3
AFE	3320@uc001yku.2@uc001ykv.2	ENSG00000080824	0.57	0.44	0.68	0.22	0.13	0.32	0.35	188	('3305@uc003rjt.1@uc010jte.1.A.1_3305@uc003rjt.1@uc010jte.1.A.0', '3305@uc003rjt.1@uc010jte.1.B.1_3305@uc003rjt.1@uc010jte.1.B.0')	(0,0):756506,(0,1):27,(1,0):36	0:36,1:27	(0,0):548019,(0,1):68,(1,0):19	0:19,1:68	6
AFE	122786@uc001wzf.1@uc001wzb.1	ENSG00000252400,ENSG00000251756,ENSG00000139926	0.2	0.13	0.31	0.66	0.41	0.92	-0.46	117.25	('2783@uc003uwf.1@uc003uwb.1.A.0', '2783@uc003uwf.1@uc003uwb.1.B.0_2783@uc003uwf.1@uc003uwb.1.B.1')	(0,0):453,(0,1):18,(1,0):41	0:41,1:18	(0,0):316,(0,1):2,(1,0):36	0:36,1:2	7
AFE	9374@uc003rme.1@uc010kqr.1	ENSG00000250535,ENSG00000204338,ENSG00000231852,ENSG00000244731,ENSG00000166278,ENSG00000204344,ENSG00000243649,ENSG00000254729,ENSG00000244255,ENSG00000204351,ENSG00000224389,ENSG00000258388,ENSG00000221988	0.24	0.12	0.42	0.83	0.54	0.99	-0.59	96.06	('89910@uc001tot.1@uc009zvj.1.B.0_89910@uc001tot.1@uc009zvj.1.B.1', '89910@uc001tot.1@uc009zvj.1.A.0')	(0,0):1476,(0,1):9,(1,0):13	0:13,1:9	(0,0):1209,(1,0):18	1904-01-01 00:18:00	12
AFE	3903@uc002qfk.1uc002qfl.1uc002qfm.1uc002qfn.1@uc002qfo.1	ENSG00000167613	0.02	0	0.06	0.26	0.13	0.43	-0.24	87.28	('253018@uc003nsw.1@uc003rxm.1.B.0_253018@uc003nsw.1@uc003rxm.1.B.1', '253018@uc003nsw.1@uc003rxm.1.A.0_253018@uc003nsw.1@uc003rxm.1.A.1')	(0,0):709974,(0,1):114,(1,0):2	0:2,1:114	(0,0):522543,(0,1):19,(1,0):6	0:6,1:19	6
AFE	84162@uc003iem.1@uc010ins.1	ENSG00000138688	0.57	0.49	0.67	0.33	0.25	0.43	0.24	83.4	('23499@uc009vvr.1uc009vvs.1@uc009vvq.1.A.0', '23499@uc009vvr.1uc009vvs.1@uc009vvq.1.B.0_23499@uc009vvr.1uc009vvs.1@uc009vvq.1.B.1')	(0,0):4171,(0,1):24,(1,0):4964	0:4964,1:24	(0,0):1933,(0,1):27,(1,0):1973	0:1973,1:27	1
AFE	5727@uc010mrs.1@uc010mrp.1	ENSG00000185920	0.82	0.5	0.98	0.25	0.09	0.51	0.57	80.95	('64221@uc001qbf.1@uc001qbc.1.A.0_64221@uc001qbf.1@uc001qbc.1.A.1_64221@uc001qbf.1@uc001qbc.1.A.2', '64221@uc001qbf.1@uc001qbc.1.B.0')	(0,0):136,(1,0):13	1904-01-01 00:13:00	(0,0):87,(0,1):5,(1,0):6	0:6,1:5	11
AFE	143570@uc001ovs.1@uc001ovr.2	ENSG00000265344,ENSG00000166435	0.65	0.31	0.96	0.11	0.04	0.27	0.54	70.98	('5218@uc003ukt.1@uc003uky.1.A.0_5218@uc003ukt.1@uc003uky.1.A.1_5218@uc003ukt.1@uc003uky.1.A.2_5218@uc003ukt.1@uc003uky.1.A.3_5218@uc003ukt.1@uc003uky.1.A.4_5218@uc003ukt.1@uc003uky.1.A.5', '5218@uc003ukt.1@uc003uky.1.B.0')	(0,0):696,(1,0):14	1904-01-01 00:14:00	(0,0):1156,(0,1):6,(1,0):9	0:9,1:6	7
AFE	8541@uc002pms.2@uc002pmr.1	ENSG00000177380	0.43	0.27	0.59	0.09	0.02	0.23	0.34	57.61	('4595@uc001cni.1uc001cnh.1@uc001cnm.1uc001cnl.1uc009vxp.1uc001cnn.1.A.1_4595@uc001cni.1uc001cnh.1@uc001cnm.1uc001cnl.1uc009vxp.1uc001cnn.1.A.0', '4595@uc001cni.1uc001cnh.1@uc001cnm.1uc001cnl.1uc009vxp.1uc001cnn.1.B.0')	(0,0):186,(0,1):15,(1,0):13	0:13,1:15	(0,0):186,(0,1):16,(1,0):1	0:1,1:16	1
AFE	5727@uc010mrs.1@uc010mrq.1	ENSG00000185920	0.8	0.56	0.99	0.2	0.08	0.4	0.6	57.28	('64221@uc001qbe.1@uc001qbc.1.A.0_64221@uc001qbe.1@uc001qbc.1.A.1_64221@uc001qbe.1@uc001qbc.1.A.2', '64221@uc001qbe.1@uc001qbc.1.B.0')	(0,0):90,(1,0):43	1904-01-01 00:43:00	(0,0):69,(0,1):5,(1,0):11	0:11,1:5	11
AFE	10626@uc002gor.1@uc002goy.1	ENSG00000221926,ENSG00000251537	0.16	0.09	0.26	0.43	0.29	0.59	-0.27	54.94	('2972@uc001yql.2@uc001yqp.2uc010axg.1uc001yqr.1.A.1_2972@uc001yql.2@uc001yqp.2uc010axg.1uc001yqr.1.A.0', '2972@uc001yql.2@uc001yqp.2uc010axg.1uc001yqr.1.B.0')	(0,0):845,(0,1):31,(1,0):17	0:17,1:31	(0,0):1046,(0,1):12,(1,0):28	0:28,1:12	14
AFE	9399@uc002awe.1uc002awf.1uc010bje.1uc002awh.1uc002awg.1@uc002awi.1	ENSG00000067221	0.05	0.02	0.1	0.62	0.22	0.95	-0.57	52.82	('89910@uc001tot.1@uc001tos.1.B.0', '89910@uc001tot.1@uc001tos.1.A.0')	(0,0):390,(0,1):9,(1,0):35	0:35,1:9	(0,0):352,(1,0):28	1904-01-01 00:28:00	12
AFE	7932@uc003nmr.1@uc003rrj.1	ENSG00000238438,ENSG00000164379,ENSG00000243439,ENSG00000054598,ENSG00000236086,ENSG00000228365,ENSG00000244041,ENSG00000261015,ENSG00000232654,ENSG00000229282,ENSG00000217707,ENSG00000219992,ENSG00000233068,ENSG00000217135,ENSG00000217566,ENSG00000216657,ENSG00000145965,ENSG00000252668,ENSG00000216307,ENSG00000201185,ENSG00000260239,ENSG00000205444,ENSG00000238801,ENSG00000217385,ENSG00000217030…	0.46	0.36	0.57	0.23	0.16	0.31	0.23	51.44	('158427@uc004axp.1@uc004axn.1.A.2_158427@uc004axp.1@uc004axn.1.A.1_158427@uc004axp.1@uc004axn.1.A.0', '158427@uc004axp.1@uc004axn.1.B.1_158427@uc004axp.1@uc004axn.1.B.0')	(0,0):462,(0,1):29,(1,0):79	0:79,1:29	(0,0):306,(0,1):44,(1,0):40	0:40,1:44	9
AFE	3145@uc001pvf.1@uc001puz.1uc001pva.1uc001pvb.1	ENSG00000256269	0.02	0	0.14	0.45	0.17	0.78	-0.43	49.16	('23345@uc003qop.2@uc010kja.1.B.4_23345@uc003qop.2@uc010kja.1.B.3_23345@uc003qop.2@uc010kja.1.B.2_23345@uc003qop.2@uc010kja.1.B.1_23345@uc003qop.2@uc010kja.1.B.0', '23345@uc003qop.2@uc010kja.1.A.1_23345@uc003qop.2@uc010kja.1.A.0')	(0,0):854,(0,1):4	0:0,1:4	(0,0):980,(1,0):9	1904-01-01 00:09:00	6
AFE	6470@uc002gsz.1@uc002gtd.1	ENSG00000176974	0.74	0.61	0.85	0.95	0.88	0.98	-0.21	48.25	('57553@uc010grd.1@uc002znj.1.B.3_57553@uc010grd.1@uc002znj.1.B.2_57553@uc010grd.1@uc002znj.1.B.1_57553@uc010grd.1@uc002znj.1.B.0', '57553@uc010grd.1@uc002znj.1.A.0')	(0,0):2091,(0,1):11,(1,0):35	0:35,1:11	(0,0):2513,(0,1):2,(1,0):64	0:64,1:2	22
AFE	57724@uc002lbn.1@uc002lbm.1uc002lbo.1	ENSG00000152223	0.21	0.13	0.33	0.68	0.4	0.93	-0.47	45.56	('1801@uc002ftu.1@uc010cjx.1.B.0_1801@uc002ftu.1@uc010cjx.1.B.1_1801@uc002ftu.1@uc010cjx.1.B.2_1801@uc002ftu.1@uc010cjx.1.B.3', '1801@uc002ftu.1@uc010cjx.1.A.0_1801@uc002ftu.1@uc010cjx.1.A.1')	(0,0):346,(0,1):12,(1,0):38	0:38,1:12	(0,0):244,(0,1):1,(1,0):31	0:31,1:1	17
AFE	56996@uc003uws.1@uc003uwq.2	ENSG00000146828	0.34	0.2	0.53	0.76	0.54	0.93	-0.42	45.55	('143570@uc001ovs.1@uc009yub.1uc001ovq.2.A.0', '143570@uc001ovs.1@uc009yub.1uc001ovq.2.B.2_143570@uc001ovs.1@uc009yub.1uc001ovq.2.B.1_143570@uc001ovs.1@uc009yub.1uc001ovq.2.B.0')	(0,0):1360,(0,1):10,(1,0):33	0:33,1:10	(0,0):1711,(0,1):2,(1,0):54	0:54,1:2	11
AFE	27031@uc003eoz.1@uc003epe.1	ENSG00000113971	0.12	0.06	0.2	0.64	0.31	0.95	-0.52	45.43	('3903@uc002qfk.1uc002qfl.1uc002qfm.1uc002qfn.1@uc002qfo.1.A.0', '3903@uc002qfk.1uc002qfl.1uc002qfm.1uc002qfn.1@uc002qfo.1.B.0')	(0,0):535,(0,1):52,(1,0):10	0:10,1:52	(0,0):43,(0,1):1,(1,0):4	0:4,1:1	19
AFE	57649@uc002hdh.1@uc002hdg.1uc002hdi.1uc002hdj.1uc002hdk.1	ENSG00000109118	0.43	0.27	0.61	0.16	0.08	0.26	0.27	44.98	('2145@uc010cyr.1@uc010cyp.1.A.3_2145@uc010cyr.1@uc010cyp.1.A.2_2145@uc010cyr.1@uc010cyp.1.A.1_2145@uc010cyr.1@uc010cyp.1.A.0', '2145@uc010cyr.1@uc010cyp.1.B.3_2145@uc010cyr.1@uc010cyp.1.B.2_2145@uc010cyr.1@uc010cyp.1.B.1_2145@uc010cyr.1@uc010cyp.1.B.0')	(0,0):201,(0,1):9,(1,0):18	0:18,1:9	(0,0):269,(0,1):25,(1,0):12	0:12,1:25	17
AFE	9857@uc001gnv.1@uc001gnr.1	ENSG00000235145,ENSG00000135837	0.37	0.19	0.58	0.76	0.62	0.88	-0.39	41.68	('5339@uc003zab.1@uc003zaj.1.A.0', '5339@uc003zab.1@uc003zaj.1.B.1_5339@uc003zab.1@uc003zaj.1.B.0')	(0,0):272,(0,1):9,(1,0):7	0:7,1:9	(0,0):442,(0,1):8,(1,0):34	0:34,1:8	8
AFE	84501@uc010cix.1@uc010civ.1	ENSG00000204991	0.29	0.18	0.42	0.67	0.47	0.86	-0.38	40.26	('55249@uc001flg.1@uc009wqw.1.A.0', '55249@uc001flg.1@uc009wqw.1.B.3_55249@uc001flg.1@uc009wqw.1.B.2_55249@uc001flg.1@uc009wqw.1.B.1_55249@uc001flg.1@uc009wqw.1.B.0')	(0,0):2461,(0,1):19,(1,0):30	0:30,1:19	(0,0):1558,(0,1):5,(1,0):38	0:38,1:5	1
AFE	121274@uc001rrn.1@uc001rro.1	ENSG00000167528	0.72	0.34	0.98	0.14	0.05	0.29	0.58	32.5	('5218@uc003uku.1@uc003uky.1.A.0_5218@uc003uku.1@uc003uky.1.A.1_5218@uc003uku.1@uc003uky.1.A.2_5218@uc003uku.1@uc003uky.1.A.3_5218@uc003uku.1@uc003uky.1.A.4', '5218@uc003uku.1@uc003uky.1.B.0')	(0,0):510,(1,0):12	1904-01-01 00:12:00	(0,0):802,(0,1):6,(1,0):8	0:8,1:6	7
AFE	6880@uc003jwd.1@uc003jwa.1	ENSG00000085231	0.54	0.22	0.85	0.08	0.04	0.15	0.46	32.46	('58499@uc004bdb.1@uc010mto.1uc004bda.1.B.0', '58499@uc004bdb.1@uc010mto.1uc004bda.1.A.0')	(0,0):305,(0,1):1,(1,0):567	0:567,1:1	(0,0):150,(0,1):7,(1,0):257	0:257,1:7	9
AFE	9374@uc003rmh.1@uc010kqr.1	ENSG00000250535,ENSG00000204338,ENSG00000231852,ENSG00000244731,ENSG00000166278,ENSG00000204344,ENSG00000243649,ENSG00000254729,ENSG00000244255,ENSG00000204351,ENSG00000224389,ENSG00000258388,ENSG00000221988	0.24	0.13	0.43	0.76	0.44	0.97	-0.52	31.12	('89910@uc001tot.1@uc001tom.2uc001top.1.B.0_89910@uc001tot.1@uc001tom.2uc001top.1.B.1_89910@uc001tot.1@uc001tom.2uc001top.1.B.2', '89910@uc001tot.1@uc001tom.2uc001top.1.A.0')	(0,0):1375,(0,1):9,(1,0):114	0:114,1:9	(0,0):1118,(1,0):109	0.0756944	12
AFE	26173@uc003skp.1@uc003skn.2uc003skq.2	ENSG00000164880	0.43	0.32	0.57	0.79	0.62	0.91	-0.36	30.9	('1954@uc002otn.2@uc002otl.2.B.0', '1954@uc002otn.2@uc002otl.2.A.0_1954@uc002otn.2@uc002otl.2.A.1_1954@uc002otn.2@uc002otl.2.A.2')	(0,0):874,(0,1):22,(1,0):50	0:50,1:22	(0,0):645,(0,1):4,(1,0):51	0:51,1:4	19
AFE	28227@uc004cpf.1@uc004cpg.1	ENSG00000167393	0.81	0.48	0.99	0.15	0.03	0.39	0.66	30.21	('3801@uc002emo.2@uc002emp.1uc002emq.1.A.4_3801@uc002emo.2@uc002emp.1uc002emq.1.A.3_3801@uc002emo.2@uc002emp.1uc002emq.1.A.2_3801@uc002emo.2@uc002emp.1uc002emq.1.A.1_3801@uc002emo.2@uc002emp.1uc002emq.1.A.0', '3801@uc002emo.2@uc002emp.1uc002emq.1.B.1_3801@uc002emo.2@uc002emp.1uc002emq.1.B.0')	(0,0):100,(1,0):11	1904-01-01 00:11:00	(0,0):164,(0,1):4,(1,0):2	0:2,1:4	16
AFE	6907@uc004css.1@uc010ndq.1	ENSG00000101849	0.14	0.08	0.27	0.67	0.32	0.95	-0.53	29.66	('23446@uc004bco.1@uc010mtk.1uc004bcn.1.A.0', '23446@uc004bco.1@uc010mtk.1uc004bcn.1.B.0')	(0,0):938,(0,1):10,(1,0):32	0:32,1:10	(0,0):1125,(0,1):1,(1,0):38	0:38,1:1	9
AFE	5218@uc010les.1@uc003uky.1	ENSG00000223584,ENSG00000058091	0.47	0.37	0.57	0.82	0.65	0.95	-0.35	29.53	('57730@uc010fid.1@uc010fie.1.A.0', '57730@uc010fid.1@uc010fie.1.B.0')	(0,0):2645,(0,1):24,(1,0):326	0:326,1:24	(0,0):1597,(0,1):3,(1,0):240	0:240,1:3	2
AFE	23001@uc003hpc.1@uc003hpd.1	ENSG00000239466,ENSG00000252062,ENSG00000163625	0.52	0.29	0.8	0.13	0.07	0.22	0.39	28.01	('4820@uc003cls.1@uc003cll.1uc003clo.1.A.0_4820@uc003cls.1@uc003cll.1uc003clo.1.A.1', '4820@uc003cls.1@uc003cll.1uc003clo.1.B.0_4820@uc003cls.1@uc003cll.1uc003clo.1.B.1')	(0,0):2969,(0,1):3,(1,0):1153	0:1153,1:3	(0,0):1745,(0,1):9,(1,0):470	0:470,1:9	3
AFE	3801@uc002emm.1@uc002emp.1uc002emq.1	ENSG00000140859	0.6	0.49	0.71	0.36	0.28	0.45	0.24	27.98	('3305@uc010kqi.1@uc010jte.1.A.1_3305@uc010kqi.1@uc010jte.1.A.0', '3305@uc010kqi.1@uc010jte.1.B.1_3305@uc010kqi.1@uc010jte.1.B.0')	(0,0):761429,(0,1):27,(1,0):40	0:40,1:27	(0,0):552170,(0,1):68,(1,0):38	0:38,1:68	6
AFE	25793@uc003ams.1@uc003amt.1	ENSG00000100225	0.58	0.49	0.68	0.8	0.7	0.89	-0.22	27.57	('79155@uc003gff.1@uc003gfg.1uc003gfh.1.A.1_79155@uc003gff.1@uc003gfg.1uc003gfh.1.A.0', '79155@uc003gff.1@uc003gfg.1uc003gfh.1.B.0')	(0,0):130,(0,1):34,(1,0):70	0:70,1:34	(0,0):167,(0,1):12,(1,0):72	0:72,1:12	4
AFE	83259@uc004fqp.1@uc004fqn.1uc004fqo.1	ENSG00000099715	0.61	0.23	0.95	0.04	0	0.26	0.57	26.12	('55243@uc009wsq.1@uc001frn.2.B.0', '55243@uc009wsq.1@uc001frn.2.A.0')	(0,0):313,(1,0):8	1904-01-01 00:08:00	(0,0):610,(0,1):3,(1,0):1	0:1,1:3	1
AFE	8379@uc003sld.1@uc003slh.1uc010ksj.1	ENSG00000002822	0.07	0.01	0.21	0.78	0.37	0.99	-0.71	25.85	('9659@uc001emf.1@uc001elo.2uc001emh.2uc001emk.2.B.0', '9659@uc001emf.1@uc001elo.2uc001emh.2uc001emk.2.A.1_9659@uc001emf.1@uc001elo.2uc001emh.2uc001emk.2.A.0')	(0,0):3884,(0,1):6,(1,0):1	0:1,1:6	(0,0):4675,(1,0):7	1904-01-01 00:07:00	1
AFE	4430@uc002usu.1@uc002usq.1uc010fsg.1	ENSG00000252130,ENSG00000128641	0.61	0.49	0.72	0.36	0.27	0.45	0.25	24.74	('3305@uc003sbq.1@uc010jte.1.A.1_3305@uc003sbq.1@uc010jte.1.A.0', '3305@uc003sbq.1@uc010jte.1.B.1_3305@uc003sbq.1@uc010jte.1.B.0')	(0,0):761426,(0,1):27,(1,0):43	0:43,1:27	(0,0):552169,(0,1):68,(1,0):39	0:39,1:68	6
AFE	113277@uc010cze.1@uc002kha.1	ENSG00000231784,ENSG00000262133,ENSG00000262003,ENSG00000263017,ENSG00000265403,ENSG00000235361,ENSG00000205899,ENSG00000262777,ENSG00000236618,ENSG00000228133,ENSG00000214014,ENSG00000108963,ENSG00000262664,ENSG00000177374,ENSG00000265777,ENSG00000236838,ENSG00000225084,ENSG00000262333,ENSG00000262456,ENSG00000239024,ENSG00000239884,ENSG00000262050,ENSG00000265566,ENSG00000142163,ENSG00000172150…	0.5	0.34	0.7	0.18	0.1	0.29	0.32	23.56	('51466@uc001ygv.1@uc010avu.1.B.0_51466@uc001ygv.1@uc010avu.1.B.1_51466@uc001ygv.1@uc010avu.1.B.2_51466@uc001ygv.1@uc010avu.1.B.3', '51466@uc001ygv.1@uc010avu.1.A.0')	(0,0):733,(0,1):7,(1,0):64	0:64,1:7	(0,0):623,(0,1):14,(1,0):27	0:27,1:14	14
AFE	56934@uc002itu.2@uc002itw.2	ENSG00000154975	0.54	0.18	0.93	0.04	0.01	0.1	0.5	23.52	('55031@uc009ygi.1@uc001mjt.1.A.0_55031@uc009ygi.1@uc001mjt.1.A.1_55031@uc009ygi.1@uc001mjt.1.A.2', '55031@uc009ygi.1@uc001mjt.1.B.0')	(0,0):1280,(1,0):9	1904-01-01 00:09:00	(0,0):1271,(0,1):5,(1,0):25	0:25,1:5	11
AFE	9374@uc003rmg.1@uc010kqr.1	ENSG00000250535,ENSG00000204338,ENSG00000231852,ENSG00000244731,ENSG00000166278,ENSG00000204344,ENSG00000243649,ENSG00000254729,ENSG00000244255,ENSG00000204351,ENSG00000224389,ENSG00000258388,ENSG00000221988	0.29	0.17	0.46	0.84	0.54	0.99	-0.55	23.43	('89910@uc001tot.1@uc001tor.2.B.0_89910@uc001tot.1@uc001tor.2.B.1_89910@uc001tot.1@uc001tor.2.B.2', '89910@uc001tot.1@uc001tor.2.A.0')	(0,0):1451,(0,1):9,(1,0):38	0:38,1:9	(0,0):1189,(1,0):37	1904-01-01 00:37:00	12
AFE	23224@uc001xgs.1@uc010apx.1	ENSG00000054654	0.48	0.29	0.76	0.12	0.07	0.21	0.36	22.79	('4820@uc003clr.1@uc003cll.1uc003clo.1.A.0_4820@uc003clr.1@uc003cll.1uc003clo.1.A.1', '4820@uc003clr.1@uc003cll.1uc003clo.1.B.0_4820@uc003clr.1@uc003cll.1uc003clo.1.B.1')	(0,0):2902,(0,1):3,(1,0):968	0:968,1:3	(0,0):1700,(0,1):9,(1,0):379	0:379,1:9	3
AFE	65268@uc004atl.1@uc010mrd.1	ENSG00000165238	0.69	0.56	0.82	0.92	0.84	0.98	-0.23	20.36	('57553@uc010grd.1@uc002znh.2.B.1_57553@uc010grd.1@uc002znh.2.B.0', '57553@uc010grd.1@uc002znh.2.A.0')	(0,0):2914,(0,1):11,(1,0):51	0:51,1:11	(0,0):4058,(0,1):2,(1,0):64	0:64,1:2	22
AFE	7164@uc003pzz.1@uc003pzu.1uc003pzv.1uc003pzw.1	ENSG00000111907	0.06	0.01	0.39	0.62	0.22	0.99	-0.56	20.04	('9919@uc004chq.1@uc010nbo.1.B.1_9919@uc004chq.1@uc010nbo.1.B.0', '9919@uc004chq.1@uc010nbo.1.A.0')	(0,0):1021,(0,1):3,(1,0):615	0:615,1:3	(0,0):510,(1,0):217	0.150694	9
AFE	9734@uc010kue.1@uc003suc.1	ENSG00000048052	0.04	0	0.19	0.67	0.23	0.97	-0.63	19.05	('10395@uc003wwl.1@uc003wwm.1uc003wwn.1.B.1_10395@uc003wwl.1@uc003wwm.1uc003wwn.1.B.0', '10395@uc003wwl.1@uc003wwm.1uc003wwn.1.A.0')	(0,0):388,(0,1):4	0:0,1:4	(0,0):1134,(1,0):4	1904-01-01 00:04:00	8
AFE	5727@uc010mro.1@uc010mrr.1uc004avo.2	ENSG00000185920	0.77	0.4	0.99	0.16	0.05	0.37	0.61	18.92	('64221@uc001qbd.1@uc001qbc.1.A.0_64221@uc001qbd.1@uc001qbc.1.A.1_64221@uc001qbd.1@uc001qbc.1.A.2_64221@uc001qbd.1@uc001qbc.1.A.3_64221@uc001qbd.1@uc001qbc.1.A.4_64221@uc001qbd.1@uc001qbc.1.A.5', '64221@uc001qbd.1@uc001qbc.1.B.0')	(0,0):113,(1,0):20	1904-01-01 00:20:00	(0,0):73,(0,1):5,(1,0):7	0:7,1:5	11
AFE	79711@uc001wmx.1@uc001wmz.1	ENSG00000254692,ENSG00000100926,ENSG00000259522,ENSG00000196497	0.1	0.03	0.2	0.45	0.27	0.64	-0.35	17.34	('50624@uc009yad.1@uc001lgs.1.A.2_50624@uc009yad.1@uc001lgs.1.A.1_50624@uc009yad.1@uc001lgs.1.A.0', '50624@uc009yad.1@uc001lgs.1.B.2_50624@uc009yad.1@uc001lgs.1.B.1_50624@uc009yad.1@uc001lgs.1.B.0')	(0,0):131,(0,1):33,(1,0):3	0:3,1:33	(0,0):109,(0,1):12,(1,0):10	0:10,1:12	10
AFE	79711@uc001wmt.1@uc001wmy.1	ENSG00000254692,ENSG00000100926,ENSG00000259522,ENSG00000196497	0.64	0.3	0.96	0.12	0.01	0.32	0.52	16.49	('401548@uc004bgi.2@uc004bgj.2.B.0', '401548@uc004bgi.2@uc004bgj.2.A.0')	(0,0):198,(1,0):2	1904-01-01 00:02:00	(0,0):379,(0,1):5	0:0,1:5	9
AFE	84971@uc010dxj.1@uc002mov.1	ENSG00000130734	0.38	0.24	0.54	0.71	0.52	0.85	-0.33	14.99	('55249@uc001flg.1@uc001flk.1.A.0', '55249@uc001flg.1@uc001flk.1.B.4_55249@uc001flg.1@uc001flk.1.B.3_55249@uc001flg.1@uc001flk.1.B.2_55249@uc001flg.1@uc001flk.1.B.1_55249@uc001flg.1@uc001flk.1.B.0')	(0,0):2463,(0,1):17,(1,0):30	0:30,1:17	(0,0):1558,(0,1):5,(1,0):38	0:38,1:5	1
AFE	2972@uc001yqk.2@uc001yql.2	ENSG00000185024	0.62	0.26	0.97	0.1	0.01	0.26	0.52	14.9	('3801@uc002emm.1@uc002emp.1uc002emq.1.A.5_3801@uc002emm.1@uc002emp.1uc002emq.1.A.4_3801@uc002emm.1@uc002emp.1uc002emq.1.A.3_3801@uc002emm.1@uc002emp.1uc002emq.1.A.2_3801@uc002emm.1@uc002emp.1uc002emq.1.A.1_3801@uc002emm.1@uc002emp.1uc002emq.1.A.0', '3801@uc002emm.1@uc002emp.1uc002emq.1.B.1_3801@uc002emm.1@uc002emp.1uc002emq.1.B.0')	(0,0):103,(1,0):8	1904-01-01 00:08:00	(0,0):164,(0,1):4,(1,0):2	0:2,1:4	16
AFE	5451@uc001geg.2@uc001gee.1	ENSG00000143190	0.87	0.6	1	0.38	0.11	0.71	0.49	14.79	('64506@uc002biq.1uc002bir.1@uc002bit.1.A.1_64506@uc002biq.1uc002bir.1@uc002bit.1.A.0', '64506@uc002biq.1uc002bir.1@uc002bit.1.B.0')	(0,0):382,(1,0):7	1904-01-01 00:07:00	(0,0):609,(0,1):4,(1,0):3	0:3,1:4	15
AFE	55031@uc009ygi.1@uc001mjt.1	ENSG00000170242	0.61	0.26	0.9	0.09	0.02	0.27	0.52	14.26	('80237@uc001zsw.1@uc001zsx.1.B.9_80237@uc001zsw.1@uc001zsx.1.B.8_80237@uc001zsw.1@uc001zsx.1.B.7_80237@uc001zsw.1@uc001zsx.1.B.6_80237@uc001zsw.1@uc001zsx.1.B.5_80237@uc001zsw.1@uc001zsx.1.B.4_80237@uc001zsw.1@uc001zsx.1.B.3_80237@uc001zsw.1@uc001zsx.1.B.2_80237@uc001zsw.1@uc001zsx.1.B.1_80237@uc001zsw.1@uc001zsx.1.B.0', '80237@uc001zsw.1@uc001zsx.1.A.0')	(0,0):6215,(0,1):1,(1,0):9	0:9,1:1	(0,0):5565,(0,1):5	0:0,1:5	15
AFE	56996@uc003uwr.1@uc003uwq.2	ENSG00000146828	0.06	0.02	0.15	0.64	0.17	0.99	-0.58	14.22	('89849@uc001otf.1uc001otg.1uc009ytk.1@uc001otc.1uc001otd.1uc009ytj.1.A.0_89849@uc001otf.1uc001otg.1uc009ytk.1@uc001otc.1uc001otd.1uc009ytj.1.A.1', '89849@uc001otf.1uc001otg.1uc009ytk.1@uc001otc.1uc001otd.1uc009ytj.1.B.0')	(0,0):571,(0,1):8,(1,0):4	0:4,1:8	(0,0):218,(1,0):3	1904-01-01 00:03:00	11
AFE	9659@uc001elk.1uc00500.uc001emk.2	ENSG00000178104	0.02	0.01	0.06	0.27	0.1	0.5	-0.25	14.16	('10411@uc001rpw.1@uc009zkq.1.A.2_10411@uc001rpw.1@uc009zkq.1.A.1_10411@uc001rpw.1@uc009zkq.1.A.0', '10411@uc001rpw.1@uc009zkq.1.B.1_10411@uc001rpw.1@uc009zkq.1.B.0')	(0,0):374,(0,1):9,(1,0):2	0:2,1:9	(0,0):260,(0,1):3,(1,0):12	0:12,1:3	12
AFE	51426@uc003kef.1@uc003kea.2uc003keb.2uc010izq.1uc003kee.1	ENSG00000122008	0.26	0.18	0.34	0.66	0.41	0.87	-0.4	14.15	('57730@uc010fie.1@uc002sxy.1.B.4_57730@uc010fie.1@uc002sxy.1.B.3_57730@uc010fie.1@uc002sxy.1.B.2_57730@uc010fie.1@uc002sxy.1.B.1_57730@uc010fie.1@uc002sxy.1.B.0', '57730@uc010fie.1@uc002sxy.1.A.0')	(0,0):1728,(0,1):24,(1,0):119	0:119,1:24	(0,0):1140,(0,1):3,(1,0):86	0:86,1:3	2
AFE	31@uc002hnl.1@uc002hnn.1	ENSG00000132142	0.69	0.56	0.81	0.89	0.84	0.94	-0.2	13.89	('10381@uc002fpk.1@uc002fpf.2.A.0_10381@uc002fpk.1@uc002fpf.2.A.1', '10381@uc002fpk.1@uc002fpf.2.B.0')	(0,0):24,(0,1):13,(1,0):53	0:53,1:13	(0,0):76,(0,1):13,(1,0):198	0:198,1:13	16
AFE	56934@uc002itu.2@uc002itx.2	ENSG00000154975	0.87	0.67	0.99	0.39	0.17	0.67	0.48	13.85	('4054@uc001oef.1@uc001oeh.1.A.6_4054@uc001oef.1@uc001oeh.1.A.5_4054@uc001oef.1@uc001oeh.1.A.4_4054@uc001oef.1@uc001oeh.1.A.3_4054@uc001oef.1@uc001oeh.1.A.2_4054@uc001oef.1@uc001oeh.1.A.1_4054@uc001oef.1@uc001oeh.1.A.0', '4054@uc001oef.1@uc001oeh.1.B.0')	(0,0):42,(0,1):1,(1,0):15	0:15,1:1	(0,0):51,(0,1):6,(1,0):5	0:5,1:6	11
AFE	224@uc002gwd.1@uc002gwa.1uc002gwb.1	ENSG00000072210	0.86	0.7	0.97	0.52	0.31	0.74	0.34	13.79	('153129@uc010ivx.1@uc010ivy.1.B.4_153129@uc010ivx.1@uc010ivy.1.B.3_153129@uc010ivx.1@uc010ivy.1.B.2_153129@uc010ivx.1@uc010ivy.1.B.1_153129@uc010ivx.1@uc010ivy.1.B.0', '153129@uc010ivx.1@uc010ivy.1.A.1_153129@uc010ivx.1@uc010ivy.1.A.0')	(0,0):649,(0,1):2,(1,0):39	0:39,1:2	(0,0):503,(0,1):6,(1,0):15	0:15,1:6	5
AFE	11270@uc003rvu.1@uc003rdr.1	ENSG00000222894,ENSG00000137404,ENSG00000204590,ENSG00000146112,ENSG00000204560,ENSG00000204569	0.61	0.17	0.97	0.03	0.01	0.16	0.58	13.16	('79711@uc001wmt.1@uc001wmx.1.B.4_79711@uc001wmt.1@uc001wmx.1.B.3_79711@uc001wmt.1@uc001wmx.1.B.2_79711@uc001wmt.1@uc001wmx.1.B.1_79711@uc001wmt.1@uc001wmx.1.B.0', '79711@uc001wmt.1@uc001wmx.1.A.0')	(0,0):770,(1,0):146	0.101389	(0,0):891,(0,1):4,(1,0):155	0:155,1:4	14
AFE	9659@uc001emf.1@uc001elo.2uc001emh.2uc001emk.2	ENSG00000178104	0.45	0.35	0.55	0.24	0.16	0.33	0.21	13.12	('80324@uc001uji.1@uc001ujf.1.A.0', '80324@uc001uji.1@uc001ujf.1.B.0')	(0,0):216,(0,1):32,(1,0):55	0:55,1:32	(0,0):233,(0,1):47,(1,0):30	0:30,1:47	12
AFE	3305@uc003sbq.1@uc010jte.1	ENSG00000222248,ENSG00000137267,ENSG00000218472,ENSG00000260604,ENSG00000230648,ENSG00000237716,ENSG00000231811,ENSG00000260673,ENSG00000236336,ENSG00000220685,ENSG00000265083,ENSG00000264541,ENSG00000220446,ENSG00000218574,ENSG00000217239,ENSG00000216360,ENSG00000230770,ENSG00000239472,ENSG00000124785,ENSG00000241216,ENSG00000261211,ENSG00000224532,ENSG00000219986,ENSG00000240936,ENSG00000251762…	0.03	0	0.1	0.39	0.14	0.72	-0.36	12.91	('2550@uc003rrh.2uc003rrk.2@uc003qzg.2uc003qzh.2uc003qzi.2.A.0', '2550@uc003rrh.2uc003rrk.2@uc003qzg.2uc003qzh.2uc003qzi.2.B.0')	(0,0):1701,(0,1):8	0:0,1:8	(0,0):1494,(0,1):2,(1,0):5	0:5,1:2	6
AFE	25793@uc003amt.1@uc003amq.1	ENSG00000100225	0.14	0.07	0.29	0.66	0.29	0.95	-0.52	12.79	('53827@uc002nyi.1@uc002nyh.1.B.0', '53827@uc002nyi.1@uc002nyh.1.A.0')	(0,0):1446,(0,1):7,(1,0):40	0:40,1:7	(0,0):906,(1,0):42	1904-01-01 00:42:00	19
AFE	9139@uc002wzk.1@uc002wzh.1	ENSG00000078699	0.53	0.39	0.7	0.28	0.2	0.37	0.25	12.73	('10772@uc009vqw.1uc009vqz.1@uc009vqx.1uc009vra.1.A.1_10772@uc009vqw.1uc009vqz.1@uc009vqx.1uc009vra.1.A.0', '10772@uc009vqw.1uc009vqz.1@uc009vqx.1uc009vra.1.B.0')	(0,0):2296,(0,1):10,(1,0):176	0:176,1:10	(0,0):2009,(0,1):25,(1,0):144	0:144,1:25	1
AFE	2550@uc003rrh.2uc003rrk.2@uc003qzg.2uc003qzh.2uc003qzi.2	ENSG00000225797,ENSG00000204687,ENSG00000230164,ENSG00000213900,ENSG00000229281,ENSG00000204694,ENSG00000204681,ENSG00000213886,ENSG00000243729,ENSG00000112462	0.18	0.09	0.36	0.72	0.36	0.95	-0.54	12.46	('6452@uc003gfm.2@uc003gfi.2.A.0', '6452@uc003gfm.2@uc003gfi.2.B.0_6452@uc003gfm.2@uc003gfi.2.B.1')	(0,0):432,(0,1):8,(1,0):35	0:35,1:8	(0,0):488,(1,0):41	1904-01-01 00:41:00	4
AFE	9857@uc001gnx.1@uc001gnr.1	ENSG00000235145,ENSG00000135837	0.22	0.13	0.36	0.61	0.34	0.85	-0.39	12.3	('2185@uc010luq.1@uc003xfp.1.B.0_2185@uc010luq.1@uc003xfp.1.B.1', '2185@uc010luq.1@uc003xfp.1.A.0')	(0,0):1029,(0,1):9,(1,0):104	0:104,1:9	(0,0):1309,(0,1):1,(1,0):85	0:85,1:1	8
AFE	10458@uc002jzh.1@uc0441.uc002jzg.1	ENSG00000175866	0.21	0.13	0.31	0.45	0.34	0.56	-0.24	11.68	('2972@uc001yqk.2@uc001yql.2.B.1_2972@uc001yqk.2@uc001yql.2.B.0', '2972@uc001yqk.2@uc001yql.2.A.2_2972@uc001yqk.2@uc001yql.2.A.1_2972@uc001yqk.2@uc001yql.2.A.0')	(0,0):449,(0,1):57,(1,0):17	0:17,1:57	(0,0):382,(0,1):31,(1,0):28	0:28,1:31	14
AFE	5337@uc003fhu.2@uc003fhr.1	ENSG00000075651	0.39	0.29	0.51	0.71	0.5	0.91	-0.32	11.51	('729540@uc002tfe.1@uc010fjp.1.A.0_729540@uc002tfe.1@uc010fjp.1.A.1_729540@uc002tfe.1@uc010fjp.1.A.2_729540@uc002tfe.1@uc010fjp.1.A.3_729540@uc002tfe.1@uc010fjp.1.A.4_729540@uc002tfe.1@uc010fjp.1.A.5_729540@uc002tfe.1@uc010fjp.1.A.6_729540@uc002tfe.1@uc010fjp.1.A.7_729540@uc002tfe.1@uc010fjp.1.A.8_729540@uc002tfe.1@uc010fjp.1.A.9', '729540@uc002tfe.1@uc010fjp.1.B.0')	(0,0):1611,(0,1):21,(1,0):198	0:198,1:21	(0,0):1137,(0,1):3,(1,0):126	0:126,1:3	2
AFE	57554@uc001deq.1@uc001dep.1	ENSG00000240692,ENSG00000229359,ENSG00000033122	0.18	0.1	0.28	0.56	0.29	0.83	-0.38	11.5	('6470@uc002gsz.1@uc002gtd.1.A.1_6470@uc002gsz.1@uc002gtd.1.A.0', '6470@uc002gsz.1@uc002gtd.1.B.2_6470@uc002gsz.1@uc002gtd.1.B.1_6470@uc002gsz.1@uc002gtd.1.B.0')	(0,0):295,(0,1):20,(1,0):29	0:29,1:20	(0,0):303,(0,1):3,(1,0):24	0:24,1:3	17
AFE	317662@uc009xrb.1@uc009xqz.1	ENSG00000227382,ENSG00000138286	0.12	0.01	0.38	0.57	0.32	0.8	-0.45	11.26	('7932@uc003nmr.1@uc003rrj.1.B.0', '7932@uc003nmr.1@uc003rrj.1.A.0')	(0,0):627603,(0,1):6	0:0,1:6	(0,0):453093,(0,1):4,(1,0):6	0:6,1:4	6
AFE	55243@uc009wsq.1@uc001frn.2	ENSG00000226520,ENSG00000183853	0.56	0.46	0.67	0.84	0.68	0.96	-0.28	10.87	('215@uc004fig.1@uc004fif.1.B.0', '215@uc004fig.1@uc004fif.1.A.0_215@uc004fig.1@uc004fif.1.A.1_215@uc004fig.1@uc004fif.1.A.2')	(0,0):428,(0,1):19,(1,0):195	0:195,1:19	(0,0):318,(0,1):3,(1,0):133	0:133,1:3	X
AFE	23133@uc004dsv.2@uc004dst.1	ENSG00000172943	0.81	0.46	0.99	0.29	0.14	0.54	0.52	10.84	('1894@uc003fim.1@uc003fik.1uc003fil.1.A.0_1894@uc003fim.1@uc003fik.1uc003fil.1.A.1', '1894@uc003fim.1@uc003fik.1uc003fil.1.B.0')	(0,0):2086,(1,0):35	1904-01-01 00:35:00	(0,0):1587,(0,1):5,(1,0):15	0:15,1:5	3
AFE	54507@uc009wlx.1@uc009wlv.1	ENSG00000143382,ENSG00000264553,ENSG00000225996	0.85	0.63	0.99	0.45	0.27	0.68	0.4	10.63	('1445@uc010bkc.1@uc010bkb.1.A.0_1445@uc010bkc.1@uc010bkb.1.A.1', '1445@uc010bkc.1@uc010bkb.1.B.0_1445@uc010bkc.1@uc010bkb.1.B.1_1445@uc010bkc.1@uc010bkb.1.B.2')	(0,0):1347,(1,0):112	0.0777778	(0,0):1085,(0,1):5,(1,0):84	0:84,1:5	15
AFE	2145@uc010cyr.1@uc010cyp.1	ENSG00000108799	0.68	0.3	0.95	0.17	0.06	0.46	0.51	10.51	('6880@uc003mol.1@uc003mom.1.B.0', '6880@uc003mol.1@uc003mom.1.A.0')	(0,0):216,(1,0):77	0.0534722	(0,0):183,(0,1):3,(1,0):48	0:48,1:3	5
AFE	23133@uc004dsv.2@uc004dsy.2	ENSG00000172943	0.64	0.41	0.86	0.26	0.14	0.39	0.38	10.51	('545@uc003euy.1@uc003eux.2.A.0', '545@uc003euy.1@uc003eux.2.B.0')	(0,0):3722,(0,1):4,(1,0):20	0:20,1:4	(0,0):3553,(0,1):15,(1,0):13	0:13,1:15	3
AFE	23353@uc003sjk.1@uc003sje.1	ENSG00000164828	0.24	0.1	0.43	0.69	0.41	0.89	-0.45	10.28	('23348@uc001vnq.1@uc001vnr.1.A.2_23348@uc001vnq.1@uc001vnr.1.A.1_23348@uc001vnq.1@uc001vnr.1.A.0', '23348@uc001vnq.1@uc001vnr.1.B.0')	(0,0):132,(0,1):14,(1,0):6,(1,1):3	0:8,1:15	(0,0):83,(0,1):2,(1,0):9,(1,1):8	0:15,1:4	13
AFE	23623@uc001fks.2@uc009wqp.1	ENSG00000160753	0.17	0.08	0.28	0.46	0.29	0.65	-0.29	10.11	('23077@uc001vkg.1@uc001vkf.1.B.1_23077@uc001vkg.1@uc001vkf.1.B.0', '23077@uc001vkg.1@uc001vkf.1.A.0')	(0,0):7486,(0,1):26,(1,0):10	0:10,1:26	(0,0):5708,(0,1):10,(1,0):17	0:17,1:10	13
AFE	84947@uc010kjq.1@uc003qrb.1	ENSG00000122335	0.91	0.78	0.99	0.62	0.47	0.77	0.29	10.11	('9659@uc001emb.1@uc001elo.2uc001emh.2uc001emk.2.A.0', '9659@uc001emb.1@uc001elo.2uc001emh.2uc001emk.2.B.0')	(0,0):3559,(0,1):1,(1,0):187	0:187,1:1	(0,0):4424,(0,1):7,(1,0):105	0:105,1:7	1
AFE	83642@uc003bjz.1@uc003bjx.1	ENSG00000073169	0.04	0.01	0.15	0.56	0.18	0.96	-0.52	9.64	('9696@uc001azv.2@uc001azt.2.A.0', '9696@uc001azv.2@uc001azt.2.B.0')	(0,0):1848,(0,1):4,(1,0):48	0:48,1:4	(0,0):1017,(1,0):24	1904-01-01 00:24:00	1
AFE	1894@uc003fim.1@uc003fij.1	ENSG00000114346	0.12	0.07	0.19	0.39	0.2	0.61	-0.27	9.51	('861@uc002yul.1@uc002yuk.2.B.0', '861@uc002yul.1@uc002yuk.2.A.0')	(0,0):20393,(0,1):22,(1,0):51	0:51,1:22	(0,0):10509,(0,1):3,(1,0):28	0:28,1:3	21
AFE	9147@uc001wxb.1@uc010anq.1	ENSG00000197502,ENSG00000165525	0.15	0.09	0.25	0.43	0.24	0.65	-0.28	9.49	('55249@uc001flg.1@uc001fli.1uc001flj.1.A.0', '55249@uc001flg.1@uc001fli.1uc001flj.1.B.2_55249@uc001flg.1@uc001fli.1uc001flj.1.B.1_55249@uc001flg.1@uc001fli.1uc001flj.1.B.0')	(0,0):2464,(0,1):16,(1,0):30	0:30,1:16	(0,0):1558,(0,1):5,(1,0):38	0:38,1:5	1
AFE	58499@uc004bdb.1@uc010mto.1uc004bda.1	ENSG00000242631,ENSG00000148143	0.73	0.45	0.95	0.14	0.02	0.45	0.59	9.39	('1801@uc002ftw.2@uc002ftu.1.B.0_1801@uc002ftw.2@uc002ftu.1.B.1', '1801@uc002ftw.2@uc002ftu.1.A.0')	(0,0):231,(0,1):1,(1,0):12	0:12,1:1	(0,0):139,(0,1):5,(1,0):1	0:1,1:5	17
AFE	7148@uc003sdl.1@uc003nzl.2	ENSG00000218472,ENSG00000260604,ENSG00000230648,ENSG00000237716,ENSG00000231811,ENSG00000260673,ENSG00000236336,ENSG00000220685,ENSG00000265083,ENSG00000264541,ENSG00000220446,ENSG00000218574,ENSG00000217239,ENSG00000216360,ENSG00000230770,ENSG00000239472,ENSG00000124785,ENSG00000241216,ENSG00000261211,ENSG00000224532,ENSG00000219986,ENSG00000240936,ENSG00000251762,ENSG00000201483,ENSG00000220472…	0.7	0.36	0.97	0.19	0.09	0.37	0.51	9.34	('58499@uc004bdb.1@uc004bcz.1.B.0_58499@uc004bdb.1@uc004bcz.1.B.1', '58499@uc004bdb.1@uc004bcz.1.A.0')	(0,0):2062,(0,1):1,(1,0):44	0:44,1:1	(0,0):1107,(0,1):7,(1,0):23	0:23,1:7	9
AFE	144132@uc001mdq.1@uc001mdp.1	ENSG00000265264,ENSG00000179532	0.74	0.28	0.96	0.21	0.07	0.46	0.53	9.06	('340348@uc003voq.1@uc003vop.1.A.0', '340348@uc003voq.1@uc003vop.1.B.0')	(0,0):173,(1,0):14	1904-01-01 00:14:00	(0,0):234,(0,1):4,(1,0):8	0:8,1:4	7
AFE	64221@uc001qbf.1@uc001qbc.1	ENSG00000154134	0.12	0.02	0.36	0.71	0.25	0.99	-0.59	8.93	('9905@uc002fuq.1@uc002fum.2uc002fun.2.A.0', '9905@uc002fuq.1@uc002fum.2uc002fun.2.B.0')	(0,0):871,(0,1):4,(1,0):2	0:2,1:4	(0,0):637,(1,0):1	1904-01-01 00:01:00	17
AFE	79925@uc003jjp.1@uc003jjn.1uc003jjq.2uc003jjo.1	ENSG00000152582	0.22	0.12	0.36	0.57	0.34	0.84	-0.35	8.71	('27343@uc001kte.1@uc001ktl.1.A.0', '27343@uc001kte.1@uc001ktl.1.B.2_27343@uc001kte.1@uc001ktl.1.B.1_27343@uc001kte.1@uc001ktl.1.B.0')	(0,0):141,(0,1):11,(1,0):13	0:13,1:11	(0,0):92,(0,1):2,(1,0):13	0:13,1:2	10
AFE	55249@uc001flg.1@uc001flk.1	ENSG00000163374	0.65	0.55	0.74	0.42	0.29	0.55	0.23	8.7	('28227@uc004cpf.1@uc004fot.1.A.1_28227@uc004cpf.1@uc004fot.1.A.0', '28227@uc004cpf.1@uc004fot.1.B.0')	(0,0):1012,(0,1):27,(1,0):105	0:105,1:27	(0,0):984,(0,1):22,(1,0):32	0:32,1:22	X
AFE	80700@uc002mam.1@uc002man.1	ENSG00000167671	0.69	0.36	0.91	0.23	0.08	0.44	0.46	8.62	('55680@uc001joa.1@uc009xpv.1.A.0', '55680@uc001joa.1@uc009xpv.1.B.3_55680@uc001joa.1@uc009xpv.1.B.2_55680@uc001joa.1@uc009xpv.1.B.1_55680@uc001joa.1@uc009xpv.1.B.0')	(0,0):295,(0,1):2,(1,0):19	0:19,1:2	(0,0):243,(0,1):7,(1,0):5	0:5,1:7	10
AFE	83933@uc003bkk.1@uc003bkf.1	ENSG00000100429,ENSG00000188130	0.36	0.3	0.43	0.56	0.45	0.69	-0.2	8.45	('9857@uc001gnx.1@uc001gnr.1.A.0', '9857@uc001gnx.1@uc001gnr.1.B.0')	(0,0):4694,(0,1):44,(1,0):541	0:541,1:44	(0,0):3804,(0,1):16,(1,0):439	0:439,1:16	1
AFE	4781@uc003zld.1@uc003zle.1uc003zlf.1	ENSG00000147862	0.22	0.02	0.58	0.75	0.43	0.94	-0.53	8.44	('10107@uc003rud.1uc003rue.2@uc003rca.1uc003rcb.2.B.0', '10107@uc003rud.1uc003rue.2@uc003rca.1uc003rcb.2.A.0')	(0,0):7477,(0,1):1	0:0,1:1	(0,0):4669,(0,1):1,(1,0):5	0:5,1:1	6
AFE	27343@uc001kte.1@uc001ktl.1	ENSG00000166169	0.02	0	0.19	0.58	0.13	0.96	-0.56	8.36	('53916@uc002opf.1@uc002opd.1.A.0', '53916@uc002opf.1@uc002opd.1.B.0')	(0,0):97,(0,1):3,(1,0):7	0:7,1:3	(0,0):45,(1,0):6	1904-01-01 00:06:00	19
AFE	10626@uc002gox.1@uc002goy.1	ENSG00000221926,ENSG00000251537	0.1	0.07	0.14	0.41	0.18	0.79	-0.31	8.35	('9834@uc010axt.1@uc001ysr.2.A.0', '9834@uc010axt.1@uc001ysr.2.B.0_9834@uc010axt.1@uc001ysr.2.B.1')	(0,0):1157,(0,1):26,(1,0):233	0:233,1:26	(0,0):416,(0,1):3,(1,0):131	0:131,1:3	14
AFE	862@uc003yfc.1@uc003yfe.1uc003yfh.1	ENSG00000079102	0.69	0.43	0.91	0.29	0.17	0.45	0.4	8.33	('23623@uc001fks.2@uc001fkp.2uc001fkq.2.A.0_23623@uc001fks.2@uc001fkp.2uc001fkq.2.A.1_23623@uc001fks.2@uc001fkp.2uc001fkq.2.A.2', '23623@uc001fks.2@uc001fkp.2uc001fkq.2.B.0_23623@uc001fks.2@uc001fkp.2uc001fkq.2.B.1')	(0,0):112,(0,1):2,(1,0):70	0:70,1:2	(0,0):111,(0,1):9,(1,0):46	0:46,1:9	1
AFE	154664@uc010kyu.1@uc010kyr.1	ENSG00000179869	0.04	0.01	0.21	0.58	0.17	0.96	-0.54	8.32	('51657@uc003ueg.1@uc003uen.1.A.2_51657@uc003ueg.1@uc003uen.1.A.1_51657@uc003ueg.1@uc003uen.1.A.0', '51657@uc003ueg.1@uc003uen.1.B.0')	(0,0):177,(0,1):3,(1,0):56	0:56,1:3	(0,0):165,(1,0):20	1904-01-01 00:20:00	7
AFE	4798@uc009zcr.1@uc001qfh.1	ENSG00000170322	0.04	0.01	0.09	0.25	0.11	0.42	-0.21	8.32	('253018@uc003rfk.1@uc003rxm.1.B.0_253018@uc003rfk.1@uc003rxm.1.B.1', '253018@uc003rfk.1@uc003rxm.1.A.0_253018@uc003rfk.1@uc003rxm.1.A.1')	(0,0):2217,(0,1):114,(1,0):4	0:4,1:114	(0,0):1851,(0,1):19,(1,0):5	0:5,1:19	6
AFE	3304@uc003rjw.2@uc003sbt.2	ENSG00000227198,ENSG00000201207,ENSG00000240053,ENSG00000250641,ENSG00000204424,ENSG00000244355,ENSG00000228727,ENSG00000204388,ENSG00000204469,ENSG00000263020,ENSG00000204444,ENSG00000204420,ENSG00000204435,ENSG00000204389,ENSG00000204410,ENSG00000255152	0.19	0.09	0.35	0.69	0.35	0.95	-0.5	8.3	('4439@uc003nwy.1@uc003sbi.1uc003sbj.1uc003sbk.1.A.0', '4439@uc003nwy.1@uc003sbi.1uc003sbj.1uc003sbk.1.B.0_4439@uc003nwy.1@uc003sbi.1uc003sbj.1uc003sbk.1.B.1')	(0,0):759759,(0,1):6,(1,0):158	0:158,1:6	(0,0):551391,(1,0):76	0.0527778	6
AFE	9578@uc001ymj.1@uc001ymi.1	ENSG00000198752	0.07	0.02	0.16	0.36	0.18	0.6	-0.29	8.18	('10411@uc001rpw.1@uc009zkp.1.A.2_10411@uc001rpw.1@uc009zkp.1.A.1_10411@uc001rpw.1@uc009zkp.1.A.0', '10411@uc001rpw.1@uc009zkp.1.B.0')	(0,0):372,(0,1):11,(1,0):2	0:2,1:11	(0,0):257,(0,1):6,(1,0):12	0:12,1:6	12
AFE	7222@uc003ief.1@uc003ieg.1	ENSG00000138741	0.92	0.71	0.99	0.48	0.14	0.76	0.44	8.12	('54796@uc010mii.1uc003zmi.1uc003zmj.1uc003zmn.1@uc010mij.1.A.0', '54796@uc010mii.1uc003zmi.1uc003zmj.1uc003zmn.1@uc010mij.1.B.2_54796@uc010mii.1uc003zmi.1uc003zmj.1uc003zmn.1@uc010mij.1.B.1_54796@uc010mii.1uc003zmi.1uc003zmj.1uc003zmn.1@uc010mij.1.B.0')	(0,0):886,(1,0):64	0.0444444	(0,0):1263,(0,1):1,(1,0):8	0:8,1:1	9
AFE	26716@uc003qyw.1@uc010koq.1	ENSG00000197171,ENSG00000204695,ENSG00000168787,ENSG00000251608,ENSG00000206474,ENSG00000204688,ENSG00000232505	0.04	0.01	0.22	0.52	0.15	0.89	-0.48	7.99	('93343@uc002ngq.1@uc002ngn.1uc002ngo.1.A.0', '93343@uc002ngq.1@uc002ngn.1uc002ngo.1.B.0')	(0,0):371,(0,1):4,(1,0):26	0:26,1:4	(0,0):192,(1,0):17	1904-01-01 00:17:00	19
AFE	89849@uc001otf.1uc001otg.1uc009ytk.1@uc001otc.1uc001otd.1uc009ytj.1	ENSG00000168010	0.15	0.08	0.27	0.52	0.26	0.87	-0.37	7.86	('84451@uc001hvu.2@uc001hvs.1uc001hvt.2.B.0', '84451@uc001hvu.2@uc001hvs.1uc001hvt.2.A.0')	(0,0):743,(0,1):10,(1,0):32	0:32,1:10	(0,0):797,(0,1):2,(1,0):41	0:41,1:2	1
AFE	10251@uc010nvl.1@uc010nxp.1	ENSG00000227427,ENSG00000235124,ENSG00000236852,ENSG00000228182,ENSG00000236813,ENSG00000232794,ENSG00000244006,ENSG00000230889,ENSG00000226502,ENSG00000222596,ENSG00000225569,ENSG00000228158,ENSG00000227534,ENSG00000233833,ENSG00000237311,ENSG00000207939,ENSG00000226820,ENSG00000235892,ENSG00000226280,ENSG00000233710,ENSG00000228125,ENSG00000206646,ENSG00000225925,ENSG00000236735,ENSG00000232267…	0.53	0.12	0.96	0.03	0	0.15	0.5	7.78	('79711@uc001wmt.1@uc001wmz.1.B.1_79711@uc001wmt.1@uc001wmz.1.B.0', '79711@uc001wmt.1@uc001wmz.1.A.0')	(0,0):851,(1,0):153	0.10625	(0,0):991,(0,1):4,(1,0):128	0:128,1:4	14
AFE	1375@uc003bmn.1uc003bmo.1@uc003bmq.1	ENSG00000205560,ENSG00000100288,ENSG00000254413	0.75	0.35	0.99	0.2	0.06	0.48	0.55	7.76	('27445@uc010lec.1@uc003uhx.2uc003uhv.2.A.0', '27445@uc010lec.1@uc003uhx.2uc003uhv.2.B.0')	(0,0):255,(1,0):9	1904-01-01 00:09:00	(0,0):655,(0,1):4,(1,0):6	0:6,1:4	7
AFE	64333@uc001soa.1@uc001sob.1	ENSG00000123329	0.36	0.26	0.46	0.61	0.46	0.77	-0.25	7.6	('83933@uc003bkk.1@uc003bke.1.A.1_83933@uc003bkk.1@uc003bke.1.A.0', '83933@uc003bkk.1@uc003bke.1.B.8_83933@uc003bkk.1@uc003bke.1.B.7_83933@uc003bkk.1@uc003bke.1.B.6_83933@uc003bkk.1@uc003bke.1.B.5_83933@uc003bkk.1@uc003bke.1.B.4_83933@uc003bkk.1@uc003bke.1.B.3_83933@uc003bkk.1@uc003bke.1.B.2_83933@uc003bkk.1@uc003bke.1.B.1_83933@uc003bkk.1@uc003bke.1.B.0')	(0,0):215,(0,1):42,(1,0):40	0:40,1:42	(0,0):111,(0,1):10,(1,0):27	0:27,1:10	22
AFE	64333@uc001soa.1@uc001soc.1	ENSG00000123329	0.47	0.35	0.58	0.76	0.58	0.9	-0.29	7.57	('83933@uc003bkk.1@uc003bkf.1.A.1_83933@uc003bkk.1@uc003bkf.1.A.0', '83933@uc003bkk.1@uc003bkf.1.B.8_83933@uc003bkk.1@uc003bkf.1.B.7_83933@uc003bkk.1@uc003bkf.1.B.6_83933@uc003bkk.1@uc003bkf.1.B.5_83933@uc003bkk.1@uc003bkf.1.B.4_83933@uc003bkk.1@uc003bkf.1.B.3_83933@uc003bkk.1@uc003bkf.1.B.2_83933@uc003bkk.1@uc003bkf.1.B.1_83933@uc003bkk.1@uc003bkf.1.B.0')	(0,0):227,(0,1):30,(1,0):40	0:40,1:30	(0,0):116,(0,1):5,(1,0):27	0:27,1:5	22
AFE	119@uc002sgx.2@uc010fdu.1	ENSG00000075340	0.78	0.51	0.97	0.32	0.15	0.59	0.46	7.39	('5218@uc010les.1@uc003uky.1.A.0_5218@uc010les.1@uc003uky.1.A.1', '5218@uc010les.1@uc003uky.1.B.0')	(0,0):452,(1,0):12	1904-01-01 00:12:00	(0,0):685,(0,1):6,(1,0):8	0:8,1:6	7
AFE	9834@uc010axt.1@uc001ysr.2	ENSG00000244620,ENSG00000226777	0.25	0.14	0.38	0.67	0.36	0.94	-0.42	7.3	('2185@uc010luq.1@uc003xfq.1.B.0_2185@uc010luq.1@uc003xfq.1.B.1', '2185@uc010luq.1@uc003xfq.1.A.0')	(0,0):1034,(0,1):9,(1,0):98	0:98,1:9	(0,0):1312,(0,1):1,(1,0):82	0:82,1:1	8
AFE	5727@uc004avl.2@uc010mrr.1uc004avo.2	ENSG00000185920	0.57	0.47	0.67	0.36	0.27	0.46	0.21	7.29	('143570@uc001ovs.1@uc001ovr.2.B.7_143570@uc001ovs.1@uc001ovr.2.B.6_143570@uc001ovs.1@uc001ovr.2.B.5_143570@uc001ovs.1@uc001ovr.2.B.4_143570@uc001ovs.1@uc001ovr.2.B.3_143570@uc001ovs.1@uc001ovr.2.B.2_143570@uc001ovs.1@uc001ovr.2.B.1_143570@uc001ovs.1@uc001ovr.2.B.0', '143570@uc001ovs.1@uc001ovr.2.A.0')	(0,0):1323,(0,1):33,(1,0):47	0:47,1:33	(0,0):1682,(0,1):54,(1,0):31	0:31,1:54	11
AFE	6871@uc002hnw.1@uc002hnt.1	ENSG00000108264	0.7	0.33	0.96	0.16	0.04	0.4	0.54	7.27	('11093@uc004cdp.2@uc02247.uc004cdx.2.A.0_11093@uc004cdp.2@uc02248.uc004cdx.2.A.1_11093@uc004cdp.2@uc02249.uc004cdx.2.A.2_11093@uc004cdp.2@uc02250.uc004cdx.2.A.3_11093@uc004cdp.2@uc02251.uc004cdx.2.A.4_11093@uc004cdp.2@uc02252.uc004cdx.2.A.5_11093@uc004cdp.2@uc02253.uc004cdx.2.A.6_11093@uc004cdp.2@uc02254.uc004cdx.2.A.7_11093@uc004cdp.2@uc02255.uc004cdx.2.A.8', '11093@uc004cdp.2@uc02256.uc004cdx.…	(0,0):814,(1,0):10	1904-01-01 00:10:00	(0,0):880,(0,1):5,(1,0):2	0:2,1:5	9
AFE	51172@uc010buc.1@uc002cyi.1	ENSG00000103174	0.64	0.55	0.74	0.85	0.74	0.96	-0.21	7.19	('652919@uc002tga.1@uc002tgb.1.A.9_652919@uc002tga.1@uc002tgb.1.A.8_652919@uc002tga.1@uc002tgb.1.A.7_652919@uc002tga.1@uc002tgb.1.A.6_652919@uc002tga.1@uc002tgb.1.A.5_652919@uc002tga.1@uc002tgb.1.A.4_652919@uc002tga.1@uc002tgb.1.A.3_652919@uc002tga.1@uc002tgb.1.A.2_652919@uc002tga.1@uc002tgb.1.A.1_652919@uc002tga.1@uc002tgb.1.A.0', '652919@uc002tga.1@uc002tgb.1.B.1_652919@uc002tga.1@uc002tgb.1.B.…	(0,0):1624,(0,1):24,(1,0):197	0:197,1:24	(0,0):1158,(0,1):5,(1,0):138	0:138,1:5	2
AFE	6464@uc001ffu.1@uc001ffx.1uc001ffy.1	ENSG00000160691	0.69	0.57	0.81	0.92	0.83	0.98	-0.23	7.14	('57553@uc010grd.1@uc002znl.1.B.6_57553@uc010grd.1@uc002znl.1.B.5_57553@uc010grd.1@uc002znl.1.B.4_57553@uc010grd.1@uc002znl.1.B.3_57553@uc010grd.1@uc002znl.1.B.2_57553@uc010grd.1@uc002znl.1.B.1_57553@uc010grd.1@uc002znl.1.B.0', '57553@uc010grd.1@uc002znl.1.A.0')	(0,0):2768,(0,1):11,(1,0):163	0:163,1:11	(0,0):3819,(0,1):2,(1,0):211	0:211,1:2	22
AFE	53827@uc002nyi.1@uc002nyh.1	ENSG00000089327	0.35	0.26	0.46	0.57	0.46	0.68	-0.22	7.09	('119@uc002sgx.2@uc010fdu.1.A.1_119@uc002sgx.2@uc010fdu.1.A.0', '119@uc002sgx.2@uc010fdu.1.B.0')	(0,0):263,(0,1):37,(1,0):37	0:37,1:37	(0,0):384,(0,1):23,(1,0):56	0:56,1:23	2
AFE	54843@uc001pay.1@uc001pbe.1uc001pbf.2	ENSG00000137501	0.7	0.43	0.96	0.27	0.15	0.41	0.43	7.07	('23191@uc001yuv.1@uc001yut.1.A.0', '23191@uc001yuv.1@uc001yut.1.B.0_23191@uc001yuv.1@uc001yut.1.B.1_23191@uc001yuv.1@uc001yut.1.B.2')	(0,0):1839,(0,1):1,(1,0):76	0:76,1:1	(0,0):1880,(0,1):7,(1,0):52	0:52,1:7	15
AFE	27343@uc001ktd.1@uc001ktl.1	ENSG00000166169	0.08	0.02	0.24	0.52	0.15	0.87	-0.44	6.85	('90273@uc002orc.1@uc002org.2uc002ore.2.A.0_90273@uc002orc.1@uc002org.2uc002ore.2.A.1_90273@uc002orc.1@uc002org.2uc002ore.2.A.2_90273@uc002orc.1@uc002org.2uc002ore.2.A.3', '90273@uc002orc.1@uc002org.2uc002ore.2.B.0')	(0,0):110,(0,1):3,(1,0):21	0:21,1:3	(0,0):258,(1,0):21	1904-01-01 00:21:00	19
AFE	9732@uc003vfv.1@uc003vfx.1uc003vfy.1uc010ljt.1	ENSG00000222346,ENSG00000234358,ENSG00000128512	0.59	0.17	0.93	0.07	0	0.31	0.52	6.84	('286@uc003xoc.1uc0031701.uc003xol.1.A.0', '286@uc003xoc.1uc0031702.uc003xol.1.B.0')	(0,0):6994,(1,0):14	1904-01-01 00:14:00	(0,0):10819,(0,1):2,(1,0):21	0:21,1:2	8
AFE	3305@uc003rjt.1@uc010jte.1	ENSG00000218472,ENSG00000260604,ENSG00000230648,ENSG00000237716,ENSG00000231811,ENSG00000260673,ENSG00000236336,ENSG00000220685,ENSG00000265083,ENSG00000264541,ENSG00000220446,ENSG00000218574,ENSG00000217239,ENSG00000216360,ENSG00000230770,ENSG00000239472,ENSG00000124785,ENSG00000241216,ENSG00000261211,ENSG00000224532,ENSG00000219986,ENSG00000240936,ENSG00000251762,ENSG00000201483,ENSG00000220472…	0.08	0.01	0.23	0.52	0.18	0.84	-0.44	6.81	('11270@uc003rvu.1@uc003rdr.1.A.1_11270@uc003rvu.1@uc003rdr.1.A.0', '11270@uc003rvu.1@uc003rdr.1.B.1_11270@uc003rvu.1@uc003rdr.1.B.0')	(0,0):25867,(0,1):18,(1,0):1	0:1,1:18	(0,0):18740,(0,1):2,(1,0):2	0:2,1:2	6
AFE	8027@uc009xjw.1@uc001ipj.1	ENSG00000251959,ENSG00000136738	0.11	0.04	0.26	0.43	0.23	0.63	-0.32	6.79	('50624@uc001lgp.1@uc001lgs.1.A.2_50624@uc001lgp.1@uc001lgs.1.A.1_50624@uc001lgp.1@uc001lgs.1.A.0', '50624@uc001lgp.1@uc001lgs.1.B.2_50624@uc001lgp.1@uc001lgs.1.B.1_50624@uc001lgp.1@uc001lgs.1.B.0')	(0,0):130,(0,1):33,(1,0):4	0:4,1:33	(0,0):109,(0,1):12,(1,0):10	0:10,1:12	10
AFE	284001@uc010dik.1@uc002kdx.1	ENSG00000176155	0.53	0.15	0.96	0.02	0.01	0.08	0.51	6.76	('51172@uc010buc.1@uc002cyi.1.B.0', '51172@uc010buc.1@uc002cyi.1.A.0')	(0,0):84,(1,0):16	1904-01-01 00:16:00	(0,0):157,(0,1):7,(1,0):21	0:21,1:7	16
AFE	4820@uc003cls.1@uc003cll.1uc003clo.1	ENSG00000114857	0.91	0.72	0.99	0.49	0.23	0.74	0.42	6.59	('7148@uc003sdl.1@uc003nzl.2.A.0', '7148@uc003sdl.1@uc003nzl.2.B.1_7148@uc003sdl.1@uc003nzl.2.B.0')	(0,0):773420,(1,0):20	1904-01-01 00:20:00	(0,0):560829,(0,1):4,(1,0):10	0:10,1:4	6
AFE	56996@uc003uwu.1@uc003uwq.2	ENSG00000146828	0.15	0.01	0.47	0.62	0.33	0.92	-0.47	6.59	('54843@uc001pay.1@uc001pbe.1uc001pbf.2.A.0', '54843@uc001pay.1@uc001pbe.1uc001pbf.2.B.0')	(0,0):148,(0,1):3	0:0,1:3	(0,0):344,(0,1):2,(1,0):4	0:4,1:2	11
AFE	4240@uc002bnf.2@uc002bng.2uc002bnh.2uc010bno.1	ENSG00000140545	0.13	0	0.37	0.64	0.2	0.98	-0.51	6.54	('6499@uc003nyn.1@uc003scw.1.B.0', '6499@uc003nyn.1@uc003scw.1.A.0')	(0,0):773321,(0,1):7	0:0,1:7	(0,0):559923,(1,0):1	1904-01-01 00:01:00	6
AFE	57458@uc001tdi.2@uc001tdj.2	ENSG00000057704	0.07	0	0.54	0.67	0.23	0.98	-0.6	6.54	('752@uc002iiq.1@uc002iin.1.B.0', '752@uc002iiq.1@uc002iin.1.A.0')	(0,0):988,(0,1):2,(1,0):5	0:5,1:2	(0,0):249,(1,0):1	1904-01-01 00:01:00	17
AFE	9659@uc001emf.1@uc001elk.1uc001elw.2uc001emc.1uc001emd.1uc001emg.1	ENSG00000178104	0.06	0	0.28	0.54	0.13	0.95	-0.48	6.49	('775@uc001qky.1@uc001qka.1.B.0_775@uc001qky.1@uc001qka.1.B.1_775@uc001qky.1@uc001qka.1.B.2_775@uc001qky.1@uc001qka.1.B.3_775@uc001qky.1@uc001qka.1.B.4_775@uc001qky.1@uc001qka.1.B.5', '775@uc001qky.1@uc001qka.1.A.0')	(0,0):639,(0,1):3	0:0,1:3	(0,0):1755,(1,0):1	1904-01-01 00:01:00	12
AFE	27034@uc009zde.1@uc009zdc.1	ENSG00000151498	0.87	0.58	0.99	0.39	0.08	0.68	0.48	6.19	('93233@uc002pis.1@uc002piu.1.B.2_93233@uc002pis.1@uc002piu.1.B.1_93233@uc002pis.1@uc002piu.1.B.0', '93233@uc002pis.1@uc002piu.1.A.0')	(0,0):47,(1,0):6	1904-01-01 00:06:00	(0,0):113,(0,1):3,(1,0):1	0:1,1:3	19
AFE	283933@uc002eby.1@uc002ebz.1	ENSG00000176723	0.56	0.11	0.89	0.03	0.01	0.07	0.53	6.14	('51172@uc010buc.1@uc002cyf.1.B.0', '51172@uc010buc.1@uc002cyf.1.A.0')	(0,0):81,(1,0):15	1904-01-01 00:15:00	(0,0):153,(0,1):7,(1,0):18	0:18,1:7	16
AFE	11273@uc002drg.1@uc01518.uc002dre.1	ENSG00000168488	0.12	0.04	0.26	0.57	0.22	0.89	-0.45	6.11	('122786@uc001wzf.1@uc001wzb.1.A.0', '122786@uc001wzf.1@uc001wzb.1.B.0_122786@uc001wzf.1@uc001wzb.1.B.1_122786@uc001wzf.1@uc001wzb.1.B.2')	(0,0):382,(0,1):7,(1,0):4	0:4,1:7	(0,0):863,(0,1):1,(1,0):7	0:7,1:1	14
AFE	360@uc003zsw.1@uc003zsv.1uc003zsx.1uc010mju.1	ENSG00000165272	0.19	0.02	0.5	0.59	0.31	0.8	-0.4	6.09	('7932@uc003qze.1@uc003rrj.1.A.0', '7932@uc003qze.1@uc003rrj.1.B.0')	(0,0):3581,(0,1):6	0:0,1:6	(0,0):2863,(0,1):4,(1,0):6	0:6,1:4	6
AFE	55308@uc010cfr.1@uc002eyo.1uc002eyp.1uc002eys.1	ENSG00000157349,ENSG00000260537,ENSG00000168872	0.65	0.55	0.74	0.42	0.29	0.57	0.23	6.04	('28227@uc004cpf.1@uc004cpg.1.A.1_28227@uc004cpf.1@uc004cpg.1.A.0', '28227@uc004cpf.1@uc004cpg.1.B.0')	(0,0):1012,(0,1):27,(1,0):105	0:105,1:27	(0,0):984,(0,1):22,(1,0):32	0:32,1:22	X
AFE	2185@uc010luq.1@uc003xfo.1	ENSG00000120899	0.75	0.54	0.92	0.39	0.2	0.59	0.36	6.03	('51426@uc003kef.1@uc003kea.2uc003keb.2uc010izq.1uc003kee.1.A.0', '51426@uc003kef.1@uc003kea.2uc003keb.2uc010izq.1uc003kee.1.B.0')	(0,0):560,(0,1):4,(1,0):20	0:20,1:4	(0,0):489,(0,1):12,(1,0):11	0:11,1:12	5
AFE	23133@uc004dsx.2@uc004dsv.2	ENSG00000172943	0.57	0.25	0.87	0.14	0.03	0.44	0.43	6	('80325@uc010hsm.1@uc003ejr.1.B.0_80325@uc010hsm.1@uc003ejr.1.B.1_80325@uc010hsm.1@uc003ejr.1.B.2_80325@uc010hsm.1@uc003ejr.1.B.3_80325@uc010hsm.1@uc003ejr.1.B.4', '80325@uc010hsm.1@uc003ejr.1.A.0_80325@uc010hsm.1@uc003ejr.1.A.1')	(0,0):83,(0,1):1,(1,0):15	0:15,1:1	(0,0):56,(0,1):3,(1,0):1	0:1,1:3	3
AFE	5214@uc009xhu.1@uc009xhr.1	ENSG00000067057	0.2	0.1	0.37	0.56	0.32	0.77	-0.36	5.99	('9581@uc002ruf.1uc002rug.1uc002ruh.1@uc002ruj.1.B.1_9581@uc002ruf.1uc002rug.1uc002ruh.1@uc002ruj.1.B.0', '9581@uc002ruf.1uc002rug.1uc002ruh.1@uc002ruj.1.A.0')	(0,0):409,(0,1):10,(1,0):9	0:9,1:10	(0,0):271,(0,1):3,(1,0):14	0:14,1:3	2
AFE	130617@uc002vkb.1@uc002vjy.1uc002vjz.1uc002vka.1	ENSG00000158552	0.72	0.34	0.97	0.17	0.06	0.35	0.55	5.98	('5218@uc003ukv.1@uc003uky.1.A.0_5218@uc003ukv.1@uc003uky.1.A.1_5218@uc003ukv.1@uc003uky.1.A.2_5218@uc003ukv.1@uc003uky.1.A.3', '5218@uc003ukv.1@uc003uky.1.B.0')	(0,0):510,(1,0):12	1904-01-01 00:12:00	(0,0):802,(0,1):6,(1,0):8	0:8,1:6	7
AFE	6880@uc003mop.1@uc003jwa.1	ENSG00000199540,ENSG00000260774,ENSG00000248925,ENSG00000250848,ENSG00000214278,ENSG00000188242,ENSG00000264233,ENSG00000249908,ENSG00000215246,ENSG00000263834,ENSG00000249201,ENSG00000263670,ENSG00000248951,ENSG00000251532,ENSG00000263746,ENSG00000171421,ENSG00000250417,ENSG00000259757,ENSG00000249541,ENSG00000250716,ENSG00000259603,ENSG00000248962,ENSG00000249994,ENSG00000251506,ENSG00000251426…	0.07	0.01	0.32	0.6	0.2	0.95	-0.53	5.93	('9919@uc004chq.1@uc004chw.1uc010nbn.1.B.0', '9919@uc004chq.1@uc004chw.1uc010nbn.1.A.0')	(0,0):916,(0,1):3,(1,0):587	0:587,1:3	(0,0):443,(1,0):210	0.145833	9
AFE	10287@uc002yhz.1@uc002yib.1	ENSG00000171700	0.39	0.29	0.51	0.62	0.5	0.73	-0.23	5.92	('79711@uc001wmx.1@uc001wmz.1.A.4_79711@uc001wmx.1@uc001wmz.1.A.3_79711@uc001wmx.1@uc001wmz.1.A.2_79711@uc001wmx.1@uc001wmz.1.A.1_79711@uc001wmx.1@uc001wmz.1.A.0', '79711@uc001wmx.1@uc001wmz.1.B.1_79711@uc001wmx.1@uc001wmz.1.B.0')	(0,0):204,(0,1):37,(1,0):30,(1,1):116	0:82,1:101	(0,0):217,(0,1):26,(1,0):53,(1,1):102	0:116,1:65	14
AFE	3843@uc001vng.1@uc001vnf.1	ENSG00000065150	0.35	0.22	0.48	0.15	0.07	0.24	0.2	5.91	('3305@uc003sbq.1@uc010kna.1.A.1_3305@uc003sbq.1@uc010kna.1.A.0', '3305@uc003sbq.1@uc010kna.1.B.1_3305@uc003sbq.1@uc010kna.1.B.0')	(0,0):60771,(0,1):27,(1,0):14	0:14,1:27	(0,0):32850,(0,1):68,(1,0):11	0:11,1:68	6
AFE	2972@uc001yql.2@uc001yqp.2uc010axg.1uc001yqr.1	ENSG00000185024	0.82	0.55	0.99	0.37	0.17	0.73	0.45	5.8	('3801@uc010cdf.1@uc002emp.1uc002emq.1.A.3_3801@uc010cdf.1@uc002emp.1uc002emq.1.A.2_3801@uc010cdf.1@uc002emp.1uc002emq.1.A.1_3801@uc010cdf.1@uc002emp.1uc002emq.1.A.0', '3801@uc010cdf.1@uc002emp.1uc002emq.1.B.1_3801@uc010cdf.1@uc002emp.1uc002emq.1.B.0')	(0,0):96,(1,0):15	1904-01-01 00:15:00	(0,0):161,(0,1):4,(1,0):5	0:5,1:4	16
AFE	1954@uc002otn.2@uc002otl.2	ENSG00000105429	0.08	0	0.43	0.55	0.11	0.91	-0.47	5.67	('79925@uc003jjr.1@uc003jjn.1uc003jjq.2uc003jjo.1.A.0_79925@uc003jjr.1@uc003jjn.1uc003jjq.2uc003jjo.1.A.1_79925@uc003jjr.1@uc003jjn.1uc003jjq.2uc003jjo.1.A.2_79925@uc003jjr.1@uc003jjn.1uc003jjq.2uc003jjo.1.A.3', '79925@uc003jjr.1@uc003jjn.1uc003jjq.2uc003jjo.1.B.0')	(0,0):467,(0,1):2	0:0,1:2	(0,0):824,(1,0):5	1904-01-01 00:05:00	5
AFE	83259@uc004fqp.1@uc004fqm.1	ENSG00000252468,ENSG00000099715	0.18	0.07	0.37	0.67	0.25	0.97	-0.49	5.62	('22883@uc001aqf.1@uc001aqg.1.B.3_22883@uc001aqf.1@uc001aqg.1.B.2_22883@uc001aqf.1@uc001aqg.1.B.1_22883@uc001aqf.1@uc001aqg.1.B.0', '22883@uc001aqf.1@uc001aqg.1.A.0')	(0,0):577,(0,1):5,(1,0):146	0:146,1:5	(0,0):395,(1,0):77	0.0534722	1
AFE	55031@uc001mjt.1@uc001mjq.1uc001mjr.1uc001mjs.1	ENSG00000170242	0.83	0.48	0.98	0.35	0.13	0.68	0.48	5.52	('64506@uc002bis.1@uc002bit.1.A.0', '64506@uc002bis.1@uc002bit.1.B.0')	(0,0):380,(1,0):9	1904-01-01 00:09:00	(0,0):607,(0,1):4,(1,0):5	0:5,1:4	15
AFE	23049@uc002dfo.2@uc002dfm.1	ENSG00000238329,ENSG00000157106	0.37	0.26	0.51	0.17	0.09	0.27	0.2	5.5	('25852@uc003esf.1@uc003erx.1.A.0', '25852@uc003esf.1@uc003erx.1.B.0_25852@uc003esf.1@uc003erx.1.B.1')	(0,0):3153,(0,1):20,(1,0):37	0:37,1:20	(0,0):2178,(0,1):22,(1,0):13	0:13,1:22	3
AFE	6470@uc002gtc.1@uc002gtd.1	ENSG00000176974	0.44	0.12	0.81	0.05	0.01	0.15	0.39	5.46	('83642@uc003bjz.1@uc003bjx.1.B.0', '83642@uc003bjz.1@uc003bjx.1.A.0')	(0,0):423,(1,0):11	1904-01-01 00:11:00	(0,0):396,(0,1):3,(1,0):11	0:11,1:3	22
AFE	89910@uc001tot.1@uc009zvj.1	ENSG00000151148	0.1	0.02	0.22	0.36	0.18	0.59	-0.26	5.46	('9659@uc001elk.1uc00504.uc001emk.2.B.0', '9659@uc001elk.1uc00503.uc001emk.2.A.0')	(0,0):1867,(0,1):19,(1,0):1	0:1,1:19	(0,0):2750,(0,1):12,(1,0):7	0:7,1:12	1
AFE	55764@uc003ems.1@uc0561.uc003emq.1	ENSG00000163913	0.64	0.46	0.8	0.34	0.22	0.49	0.3	5.43	('83259@uc004fqp.1@uc004fqn.1uc004fqo.1.A.0', '83259@uc004fqp.1@uc004fqn.1uc004fqo.1.B.0')	(0,0):107,(0,1):7,(1,0):36	0:36,1:7	(0,0):268,(0,1):18,(1,0):25	0:25,1:18	Y
AFE	1375@uc003bmk.2@uc003bmt.1	ENSG00000205560,ENSG00000100288,ENSG00000254413	0.44	0.26	0.65	0.83	0.57	0.98	-0.39	5.4	('84912@uc010lml.1@uc003vrn.1uc003vro.2.B.0', '84912@uc010lml.1@uc003vrn.1uc003vro.2.A.1_84912@uc010lml.1@uc003vrn.1uc003vro.2.A.0')	(0,0):182,(0,1):6,(1,0):24	0:24,1:6	(0,0):119,(1,0):17	1904-01-01 00:17:00	7
AFE	89910@uc001tot.1@uc001tor.2	ENSG00000151148	0.26	0.1	0.48	0.67	0.36	0.94	-0.41	5.38	('9659@uc001elv.2@uc001emf.1.A.2_9659@uc001elv.2@uc001emf.1.A.1_9659@uc001elv.2@uc001emf.1.A.0', '9659@uc001elv.2@uc001emf.1.B.1_9659@uc001elv.2@uc001emf.1.B.0')	(0,0):1227,(0,1):6,(1,0):5	0:5,1:6	(0,0):1049,(1,0):4	1904-01-01 00:04:00	1
AFE	9696@uc001azv.2@uc001azt.2	ENSG00000058453	0.34	0.17	0.61	0.72	0.56	0.86	-0.38	5.36	('5339@uc003zab.1@uc003zai.1.A.0', '5339@uc003zab.1@uc003zai.1.B.0')	(0,0):268,(0,1):7,(1,0):7	0:7,1:7	(0,0):437,(0,1):6,(1,0):34	0:34,1:6	8
AFE	64319@uc002dzc.2@uc002dzd.2	ENSG00000156860	0.24	0.17	0.32	0.44	0.32	0.59	-0.2	5.34	('57649@uc002hdh.1@uc002hdg.1uc002hdi.1uc002hdj.1uc002hdk.1.A.0', '57649@uc002hdh.1@uc002hdg.1uc002hdi.1uc002hdj.1uc002hdk.1.B.0')	(0,0):512,(0,1):37,(1,0):63	0:63,1:37	(0,0):405,(0,1):14,(1,0):58	0:58,1:14	17
AFE	83933@uc003bkk.1@uc003bke.1	ENSG00000100429,ENSG00000188130	0.79	0.7	0.88	0.59	0.48	0.7	0.2	5.32	('23623@uc001fks.2@uc009wqp.1.A.0_23623@uc001fks.2@uc009wqp.1.A.1_23623@uc001fks.2@uc009wqp.1.A.2', '23623@uc001fks.2@uc009wqp.1.B.0_23623@uc001fks.2@uc009wqp.1.B.1_23623@uc001fks.2@uc009wqp.1.B.2')	(0,0):99,(0,1):15,(1,0):70	0:70,1:15	(0,0):94,(0,1):26,(1,0):46	0:46,1:26	1
AFE	3135@uc003rai.2@uc003rsn.2	ENSG00000199290,ENSG00000227758,ENSG00000181126,ENSG00000204632,ENSG00000204655,ENSG00000204642,ENSG00000261548	0.73	0.37	0.97	0.23	0.08	0.66	0.5	5.25	('23049@uc002dfo.2@uc002dfm.1.A.0', '23049@uc002dfo.2@uc002dfm.1.B.0')	(0,0):7492,(1,0):64	0.0444444	(0,0):6033,(0,1):3,(1,0):38	0:38,1:3	16
AFE	22883@uc001aqf.1@uc001aqg.1	ENSG00000171603	0.22	0.01	0.65	0.71	0.26	0.99	-0.49	5.24	('23120@uc010jit.1@uc003lym.1.B.4_23120@uc010jit.1@uc003lym.1.B.3_23120@uc010jit.1@uc003lym.1.B.2_23120@uc010jit.1@uc003lym.1.B.1_23120@uc010jit.1@uc003lym.1.B.0', '23120@uc010jit.1@uc003lym.1.A.0')	(0,0):502,(0,1):2	0:0,1:2	(0,0):1533,(1,0):3	1904-01-01 00:03:00	5
AFE	23224@uc001xgq.1@uc001xgn.1	ENSG00000054654	0.12	0.04	0.33	0.58	0.17	0.92	-0.46	5.24	('55764@uc003ems.1@uc003emr.1.B.0_55764@uc003ems.1@uc003emr.1.B.1', '55764@uc003ems.1@uc003emr.1.A.0')	(0,0):410,(0,1):5,(1,0):11	0:11,1:5	(0,0):335,(1,0):6	1904-01-01 00:06:00	3
AFE	2185@uc010luq.1@uc003xfq.1	ENSG00000120899	0.53	0.14	0.95	0.03	0	0.29	0.5	5.14	('6880@uc003mop.1@uc003jwa.1.A.2_6880@uc003mop.1@uc003jwa.1.A.1_6880@uc003mop.1@uc003jwa.1.A.0', '6880@uc003mop.1@uc003jwa.1.B.0')	(0,0):643530,(1,0):1	1904-01-01 00:01:00	(0,0):699930,(0,1):3	0:0,1:3	5
AFE	54014@uc010goi.1@uc002yxk.1uc002yxl.1uc002yxm.1	ENSG00000185658	0.1	0.03	0.29	0.64	0.16	0.95	-0.54	5.07	('161823@uc001zri.1@uc001zrh.1.B.0_161823@uc001zri.1@uc001zrh.1.B.1_161823@uc001zri.1@uc001zrh.1.B.2', '161823@uc001zri.1@uc001zrh.1.A.0_161823@uc001zri.1@uc001zrh.1.A.1')	(0,0):173,(0,1):4,(1,0):7	0:7,1:4	(0,0):116,(1,0):10	1904-01-01 00:10:00	15
AFE	22992@uc001oka.1@uc001ojy.1	ENSG00000238892,ENSG00000173120	0.1	0.02	0.24	0.61	0.18	0.92	-0.51	5.06	('389125@uc003dga.2@uc003dgb.2.A.0', '389125@uc003dga.2@uc003dgb.2.B.0')	(0,0):526,(0,1):4,(1,0):7	0:7,1:4	(0,0):166,(1,0):1	1904-01-01 00:01:00	3
AFE	55249@uc001flg.1@uc001fli.1uc001flj.1	ENSG00000163374	0.5	0.4	0.61	0.3	0.21	0.41	0.2	5.06	('11152@uc004dmn.1@uc004dmo.1.A.2_11152@uc004dmn.1@uc004dmo.1.A.1_11152@uc004dmn.1@uc004dmo.1.A.0', '11152@uc004dmn.1@uc004dmo.1.B.0')	(0,0):725,(0,1):22,(1,0):171	0:171,1:22	(0,0):397,(0,1):22,(1,0):70	0:70,1:22	X
AFE	64333@uc001snz.1@uc001soc.1	ENSG00000123329	0.63	0.5	0.75	0.34	0.2	0.54	0.29	5.06	('284001@uc010dik.1@uc002kdx.1.B.1_284001@uc010dik.1@uc002kdx.1.B.0', '284001@uc010dik.1@uc002kdx.1.A.2_284001@uc010dik.1@uc002kdx.1.A.1_284001@uc010dik.1@uc002kdx.1.A.0')	(0,0):1092,(0,1):19,(1,0):69	0:69,1:19	(0,0):889,(0,1):14,(1,0):15	0:15,1:14	17
AFE	153129@uc003jqd.1@uc010ivy.1	ENSG00000177058	0.74	0.42	0.97	0.25	0.06	0.53	0.49	5.03	('26173@uc003skp.1@uc003skn.2uc003skq.2.B.1_26173@uc003skp.1@uc003skn.2uc003skq.2.B.0', '26173@uc003skp.1@uc003skn.2uc003skq.2.A.0')	(0,0):749,(0,1):1,(1,0):4	0:4,1:1	(0,0):687,(0,1):3	0:0,1:3	7
AFE	10381@uc002fpk.1@uc002fpf.2	ENSG00000256390,ENSG00000258839,ENSG00000258947,ENSG00000198211	0.74	0.39	0.98	0.2	0.02	0.72	0.54	5.02	('440193@uc001xzi.1@uc010aty.1uc001xzl.2.A.2_440193@uc001xzi.1@uc010aty.1uc001xzl.2.A.1_440193@uc001xzi.1@uc010aty.1uc001xzl.2.A.0', '440193@uc001xzi.1@uc010aty.1uc001xzl.2.B.0')	(0,0):1850,(1,0):15	1904-01-01 00:15:00	(0,0):1748,(0,1):2,(1,0):4	0:4,1:2	14
AFE	23224@uc001xgt.1@uc001xgq.1	ENSG00000054654	0.3	0.08	0.54	0.77	0.47	0.96	-0.47	5.02	('55764@uc003ems.1@uc0565.uc003emq.1.B.0', '55764@uc003ems.1@uc0564.uc003emq.1.A.0')	(0,0):714,(0,1):5,(1,0):3	0:3,1:5	(0,0):582,(1,0):5	1904-01-01 00:05:00	3
AFE	29058@uc002wll.1@uc002wlk.1	ENSG00000089063	0.48	0.35	0.62	0.76	0.58	0.91	-0.28	5.01	('29066@uc002dbh.1@uc002dbi.1.B.1_29066@uc002dbh.1@uc002dbi.1.B.0', '29066@uc002dbh.1@uc002dbi.1.A.0')	(0,0):267,(0,1):20,(1,0):30	0:30,1:20	(0,0):144,(0,1):4,(1,0):23	0:23,1:4	16
AFE	4595@uc001cni.1uc001cnh.1@uc001cnm.1uc001cnl.1uc009vxp.1uc001cnn.1	ENSG00000132781	0.8	0.57	0.96	0.36	0.06	0.72	0.44	4.99	('11270@uc003rvs.1@uc003rdr.1.B.1_11270@uc003rvs.1@uc003rdr.1.B.0', '11270@uc003rvs.1@uc003rdr.1.A.0')	(0,0):25861,(0,1):1,(1,0):18	0:18,1:1	(0,0):18724,(0,1):2,(1,0):2	0:2,1:2	6
AFE	7148@uc003rls.2@uc003nzl.2	ENSG00000218472,ENSG00000260604,ENSG00000230648,ENSG00000237716,ENSG00000231811,ENSG00000260673,ENSG00000236336,ENSG00000220685,ENSG00000265083,ENSG00000264541,ENSG00000220446,ENSG00000218574,ENSG00000217239,ENSG00000216360,ENSG00000230770,ENSG00000239472,ENSG00000124785,ENSG00000241216,ENSG00000261211,ENSG00000224532,ENSG00000219986,ENSG00000240936,ENSG00000251762,ENSG00000201483,ENSG00000220472…	0.29	0.14	0.49	0.73	0.41	0.95	-0.44	4.9	('4781@uc003zld.1@uc003zle.1uc003zlf.1.B.0', '4781@uc003zld.1@uc003zle.1uc003zlf.1.A.3_4781@uc003zld.1@uc003zle.1uc003zlf.1.A.2_4781@uc003zld.1@uc003zle.1uc003zlf.1.A.1_4781@uc003zld.1@uc003zle.1uc003zlf.1.A.0')	(0,0):1121,(0,1):13,(1,0):8	0:8,1:13	(0,0):774,(0,1):1,(1,0):7	0:7,1:1	9
AFE	51540@uc002vxm.2@uc002vxn.2uc010fyv.1	ENSG00000132330,ENSG00000258984,ENSG00000184182	0.18	0.01	0.64	0.68	0.26	0.94	-0.5	4.89	('115677@uc002uej.1@uc002uef.1.B.0_115677@uc002uej.1@uc002uef.1.B.1_115677@uc002uej.1@uc002uef.1.B.2_115677@uc002uej.1@uc002uef.1.B.3_115677@uc002uej.1@uc002uef.1.B.4', '115677@uc002uej.1@uc002uef.1.A.0_115677@uc002uej.1@uc002uef.1.A.1_115677@uc002uej.1@uc002uef.1.A.2_115677@uc002uej.1@uc002uef.1.A.3_115677@uc002uej.1@uc002uef.1.A.4')	(0,0):177,(0,1):2	0:0,1:2	(0,0):287,(1,0):3	1904-01-01 00:03:00	2
AFE	2051@uc003wbv.1@uc003wbs.1	ENSG00000106123	0.76	0.46	0.96	0.34	0.13	0.67	0.42	4.86	('6880@uc003jwd.1@uc003jwa.1.A.2_6880@uc003jwd.1@uc003jwa.1.A.1_6880@uc003jwd.1@uc003jwa.1.A.0', '6880@uc003jwd.1@uc003jwa.1.B.0')	(0,0):1539,(1,0):3896	2.70556	(0,0):1176,(0,1):3,(1,0):3538	0:3538,1:3	5
AFE	80781@uc002zhk.1@uc002zhi.1	ENSG00000182871	0.33	0.2	0.51	0.67	0.4	0.87	-0.34	4.86	('27343@uc001ktg.1uc001kth.1@uc001ktl.1.A.0', '27343@uc001ktg.1uc001kth.1@uc001ktl.1.B.2_27343@uc001ktg.1uc001kth.1@uc001ktl.1.B.1_27343@uc001ktg.1uc001kth.1@uc001ktl.1.B.0')	(0,0):49,(0,1):11,(1,0):24	0:24,1:11	(0,0):30,(0,1):2,(1,0):21	0:21,1:2	10
AFE	79706@uc003uzf.2@uc003uzh.2	ENSG00000128563,ENSG00000239969	0.72	0.32	0.96	0.23	0.05	0.52	0.49	4.75	('5727@uc004avl.2@uc010mrr.1uc004avo.2.B.0', '5727@uc004avl.2@uc010mrr.1uc004avo.2.A.2_5727@uc004avl.2@uc010mrr.1uc004avo.2.A.1_5727@uc004avl.2@uc010mrr.1uc004avo.2.A.0')	(0,0):74,(1,0):2	1904-01-01 00:02:00	(0,0):198,(0,1):4,(1,0):1	0:1,1:4	9
AFE	5607@uc002aqx.1@uc002aqt.1uc002aqu.1uc002aqv.1	ENSG00000259512,ENSG00000137764	0.61	0.29	0.95	0.12	0.01	0.43	0.49	4.72	('7275@uc001mga.1@uc001mfy.1.B.0', '7275@uc001mga.1@uc001mfy.1.A.0')	(0,0):49,(1,0):1	1904-01-01 00:01:00	(0,0):175,(0,1):3,(1,0):1	0:1,1:3	11
AFE	2550@uc003qzb.2uc003qzf.2@uc003nmp.2uc003nms.2	ENSG00000261730,ENSG00000218027,ENSG00000266252,ENSG00000164385,ENSG00000266750,ENSG00000232999,ENSG00000233763,ENSG00000222248,ENSG00000137267,ENSG00000218472,ENSG00000260604,ENSG00000230648,ENSG00000237716,ENSG00000231811,ENSG00000260673,ENSG00000236336,ENSG00000220685,ENSG00000265083,ENSG00000264541,ENSG00000220446,ENSG00000218574,ENSG00000217239,ENSG00000216360,ENSG00000230770,ENSG00000239472…	0.74	0.3	0.99	0.2	0.07	0.4	0.54	4.68	('152503@uc003imb.2@uc010ipm.1.B.5_152503@uc003imb.2@uc010ipm.1.B.4_152503@uc003imb.2@uc010ipm.1.B.3_152503@uc003imb.2@uc010ipm.1.B.2_152503@uc003imb.2@uc010ipm.1.B.1_152503@uc003imb.2@uc010ipm.1.B.0', '152503@uc003imb.2@uc010ipm.1.A.0')	(0,0):67,(1,0):3	1904-01-01 00:03:00	(0,0):241,(0,1):6,(1,0):4	0:4,1:6	4
AFE	1375@uc003bmn.1uc003bmo.1@uc003bmu.1	ENSG00000205560,ENSG00000100288,ENSG00000254413	0.53	0.13	0.85	0.05	0	0.33	0.48	4.62	('83637@uc010kyj.1@uc003tls.1.A.0_83637@uc010kyj.1@uc003tls.1.A.1', '83637@uc010kyj.1@uc003tls.1.B.0')	(0,0):182,(1,0):60	0.0416667	(0,0):137,(0,1):2,(1,0):37	0:37,1:2	7
AFE	253018@uc003rfk.1@uc003rxm.1	ENSG00000228789,ENSG00000222895,ENSG00000238211,ENSG00000206344,ENSG00000261272,ENSG00000137310,ENSG00000204540	0.96	0.85	1	0.73	0.54	0.87	0.23	4.62	('23001@uc003hpc.1@uc003hpd.1.B.3_23001@uc003hpc.1@uc003hpd.1.B.2_23001@uc003hpc.1@uc003hpd.1.B.1_23001@uc003hpc.1@uc003hpd.1.B.0', '23001@uc003hpc.1@uc003hpd.1.A.0')	(0,0):4042,(1,0):34	1904-01-01 00:34:00	(0,0):3423,(0,1):5,(1,0):16	0:16,1:5	4
AFE	5339@uc003zab.1@uc003zad.1	ENSG00000178209	0.44	0.33	0.55	0.65	0.54	0.76	-0.21	4.55	('119@uc010fdt.1@uc010fdu.1.A.1_119@uc010fdt.1@uc010fdu.1.A.0', '119@uc010fdt.1@uc010fdu.1.B.0')	(0,0):265,(0,1):37,(1,0):35	0:35,1:37	(0,0):387,(0,1):23,(1,0):53	0:53,1:23	2
AFE	115677@uc002uej.1@uc002ueg.1uc010fpu.1	ENSG00000163072	0.29	0.06	0.64	0.74	0.28	0.98	-0.45	4.54	('1789@uc002wyc.1uc002wyd.1uc002wye.1@uc002wyf.1.A.0_1789@uc002wyc.1uc002wyd.1uc002wye.1@uc002wyf.1.A.1', '1789@uc002wyc.1uc002wyd.1uc002wye.1@uc002wyf.1.B.0')	(0,0):92,(0,1):2,(1,0):2	0:2,1:2	(0,0):91,(1,0):5	1904-01-01 00:05:00	20
AFE	56945@uc003ete.1@uc003etb.1uc003etd.1	ENSG00000175110	0.8	0.49	0.98	0.29	0.07	0.64	0.51	4.54	('3145@uc001pvf.1@uc001puz.1uc001pva.1uc001pvb.1.B.0', '3145@uc001pvf.1@uc001puz.1uc001pva.1uc001pvb.1.A.0_3145@uc001pvf.1@uc001puz.1uc001pva.1uc001pvb.1.A.1')	(0,0):130,(1,0):10	1904-01-01 00:10:00	(0,0):160,(0,1):2,(1,0):2	0:2,1:2	11
AFE	1639@uc002skt.1@uc002skx.1uc010ffd.1	ENSG00000204843,ENSG00000264324	0.69	0.4	0.94	0.29	0.14	0.53	0.4	4.51	('56996@uc003uwt.1@uc003uwq.2.A.0', '56996@uc003uwt.1@uc003uwq.2.B.0_56996@uc003uwt.1@uc003uwq.2.B.1')	(0,0):134,(0,1):1,(1,0):86	0:86,1:1	(0,0):140,(0,1):5,(1,0):56	0:56,1:5	7
AFE	22883@uc001aqf.1@uc001aqh.1uc001aqi.1	ENSG00000171603	0.74	0.58	0.89	0.41	0.25	0.61	0.33	4.5	('153129@uc003jqd.1@uc010ivy.1.B.4_153129@uc003jqd.1@uc010ivy.1.B.3_153129@uc003jqd.1@uc010ivy.1.B.2_153129@uc003jqd.1@uc010ivy.1.B.1_153129@uc003jqd.1@uc010ivy.1.B.0', '153129@uc003jqd.1@uc010ivy.1.A.1_153129@uc003jqd.1@uc010ivy.1.A.0')	(0,0):645,(0,1):6,(1,0):39	0:39,1:6	(0,0):498,(0,1):11,(1,0):15	0:15,1:11	5
AFE	55890@uc002jku.2@uc002jkp.1uc002jkq.1	ENSG00000170412	0.75	0.52	0.94	0.39	0.18	0.6	0.36	4.47	('83259@uc004fqp.1@uc004fqm.1.A.0', '83259@uc004fqp.1@uc004fqm.1.B.0_83259@uc004fqp.1@uc004fqm.1.B.1_83259@uc004fqp.1@uc004fqm.1.B.2_83259@uc004fqp.1@uc004fqm.1.B.3')	(0,0):362,(0,1):1,(1,0):36	0:36,1:1	(0,0):704,(0,1):6,(1,0):25	0:25,1:6	Y
AFE	26716@uc010jri.1@uc003qyw.1	ENSG00000238438,ENSG00000164379,ENSG00000243439,ENSG00000054598,ENSG00000236086,ENSG00000228365,ENSG00000244041,ENSG00000261015,ENSG00000232654,ENSG00000229282,ENSG00000217707,ENSG00000219992,ENSG00000233068,ENSG00000217135,ENSG00000217566,ENSG00000216657,ENSG00000145965,ENSG00000252668,ENSG00000216307,ENSG00000201185,ENSG00000260239,ENSG00000205444,ENSG00000238801,ENSG00000217385,ENSG00000217030…	0.25	0.13	0.38	0.58	0.33	0.81	-0.33	4.46	('84971@uc010dxj.1@uc002mov.1.B.0', '84971@uc010dxj.1@uc002mov.1.A.0_84971@uc010dxj.1@uc002mov.1.A.1')	(0,0):312,(0,1):14,(1,0):11	0:11,1:14	(0,0):299,(0,1):3,(1,0):12	0:12,1:3	19
AFE	93233@uc002pis.1@uc002piu.1	ENSG00000105479,ENSG00000248146	0.06	0	0.2	0.44	0.17	0.75	-0.38	4.42	('9659@uc001ema.2@uc001elo.2uc001emh.2uc001emk.2.B.0', '9659@uc001ema.2@uc001elo.2uc001emh.2uc001emk.2.A.0')	(0,0):4955,(0,1):6,(1,0):1	0:1,1:6	(0,0):5770,(0,1):3,(1,0):7	0:7,1:3	1
AFE	1981@uc010hxz.1@uc010hxy.1	ENSG00000114867,ENSG00000145191	0.84	0.62	0.99	0.5	0.27	0.71	0.34	4.41	('153129@uc010ivx.1@uc003jqf.1.B.2_153129@uc010ivx.1@uc003jqf.1.B.1_153129@uc010ivx.1@uc003jqf.1.B.0', '153129@uc010ivx.1@uc003jqf.1.A.1_153129@uc010ivx.1@uc003jqf.1.A.0')	(0,0):281,(0,1):2,(1,0):20	0:20,1:2	(0,0):225,(0,1):6,(1,0):10	0:10,1:6	5
AFE	54972@uc001nqm.1@uc001nqk.2uc001nql.1	ENSG00000006118	0.71	0.45	0.95	0.31	0.17	0.5	0.4	4.37	('23191@uc001yuu.1@uc001yut.1.A.0', '23191@uc001yuu.1@uc001yut.1.B.0_23191@uc001yuu.1@uc001yut.1.B.1_23191@uc001yuu.1@uc001yut.1.B.2')	(0,0):1274,(0,1):1,(1,0):29	0:29,1:1	(0,0):1356,(0,1):7,(1,0):24	0:24,1:7	15
AFE	23077@uc001vkg.1@uc001vkf.1	ENSG00000005810	0.15	0.04	0.33	0.73	0.18	0.99	-0.58	4.36	('165631@uc003efo.1@uc003efm.2uc003efn.2.A.0_165631@uc003efo.1@uc003efm.2uc003efn.2.A.1_165631@uc003efo.1@uc003efm.2uc003efn.2.A.2_165631@uc003efo.1@uc003efm.2uc003efn.2.A.3_165631@uc003efo.1@uc003efm.2uc003efn.2.A.4_165631@uc003efo.1@uc003efm.2uc003efn.2.A.5', '165631@uc003efo.1@uc003efm.2uc003efn.2.B.0')	(0,0):170,(0,1):4,(1,0):8	0:8,1:4	(0,0):223,(1,0):7	1904-01-01 00:07:00	3
AFE	26173@uc003skm.1@uc003skn.2uc003skq.2	ENSG00000164880	0.68	0.55	0.81	0.91	0.77	0.99	-0.23	4.33	('27106@uc002nhv.1@uc002nhu.1.B.0', '27106@uc002nhv.1@uc002nhu.1.A.0')	(0,0):410,(0,1):13,(1,0):33	0:33,1:13	(0,0):291,(0,1):1,(1,0):25	0:25,1:1	19
AFE	84033@uc001hsq.1@uc001hso.2	ENSG00000154358	0.48	0.29	0.68	0.87	0.59	0.99	-0.39	4.33	('9659@uc001emf.1@uc001elm.2.B.4_9659@uc001emf.1@uc001elm.2.B.3_9659@uc001emf.1@uc001elm.2.B.2_9659@uc001emf.1@uc001elm.2.B.1_9659@uc001emf.1@uc001elm.2.B.0', '9659@uc001emf.1@uc001elm.2.A.1_9659@uc001emf.1@uc001elm.2.A.0')	(0,0):3411,(0,1):6,(1,0):99	0:99,1:6	(0,0):3624,(1,0):103	0.0715278	1
AFE	26205@uc002yfo.1@uc002yfp.1	ENSG00000101216	0.53	0.33	0.79	0.25	0.16	0.36	0.28	4.32	('25959@uc002mqp.1@uc002mqo.2.A.0', '25959@uc002mqp.1@uc002mqo.2.B.2_25959@uc002mqp.1@uc002mqo.2.B.1_25959@uc002mqp.1@uc002mqo.2.B.0')	(0,0):30,(0,1):4,(1,0):49	0:49,1:4	(0,0):63,(0,1):18,(1,0):65	0:65,1:18	19
AFE	284309@uc002qqc.1@uc002qqa.1	ENSG00000152443	0.64	0.32	0.95	0.21	0.08	0.43	0.43	4.32	('84166@uc002ekq.1@uc002ekk.1.A.0_84166@uc002ekq.1@uc002ekk.1.A.1_84166@uc002ekq.1@uc002ekk.1.A.2_84166@uc002ekq.1@uc002ekk.1.A.3_84166@uc002ekq.1@uc002ekk.1.A.4_84166@uc002ekq.1@uc002ekk.1.A.5_84166@uc002ekq.1@uc002ekk.1.A.6_84166@uc002ekq.1@uc002ekk.1.A.7_84166@uc002ekq.1@uc002ekk.1.A.8_84166@uc002ekq.1@uc002ekk.1.A.9_84166@uc002ekq.1@uc002ekk.1.A.10_84166@uc002ekq.1@uc002ekk.1.A.11_84166@uc002…	(0,0):176,(0,1):1,(1,0):7	0:7,1:1	(0,0):448,(0,1):5,(1,0):5	0:5,1:5	16
AFE	10379@uc010alj.1@uc010ali.1uc001wmq.1	ENSG00000213928,ENSG00000259529,ENSG00000092098	0.58	0.37	0.78	0.23	0.08	0.42	0.35	4.31	('55860@uc010apc.1@uc001xdf.1.B.0', '55860@uc010apc.1@uc001xdf.1.A.0_55860@uc010apc.1@uc001xdf.1.A.1')	(0,0):587,(0,1):4,(1,0):14	0:14,1:4	(0,0):406,(0,1):7,(1,0):4	0:4,1:7	14
AFE	51126@uc002wrr.1@uc002wrp.1uc002wrq.1	ENSG00000173418	0.69	0.28	0.97	0.2	0.01	0.74	0.49	4.28	('6326@uc010fpg.1@uc002udc.1.B.0_6326@uc010fpg.1@uc002udc.1.B.1', '6326@uc010fpg.1@uc002udc.1.A.0')	(0,0):185,(1,0):1	1904-01-01 00:01:00	(0,0):537,(0,1):1	0:0,1:1	2
AFE	545@uc003euy.1@uc003eux.2	ENSG00000244327,ENSG00000175054	0.21	0.02	0.52	0.67	0.34	0.93	-0.46	4.23	('10509@uc002bpa.1@uc002boz.1.A.0_10509@uc002bpa.1@uc002boz.1.A.1', '10509@uc002bpa.1@uc002boz.1.B.0')	(0,0):117,(0,1):2,(1,0):1	0:1,1:2	(0,0):150,(0,1):1,(1,0):9	0:9,1:1	15
AFE	57708@uc001ddh.1@uc001ddi.1uc001ddj.1	ENSG00000198160	0.95	0.76	1	0.69	0.47	0.84	0.26	4.23	('31@uc002hnl.1@uc002hnq.2.B.4_31@uc002hnl.1@uc002hnq.2.B.3_31@uc002hnl.1@uc002hnq.2.B.2_31@uc002hnl.1@uc002hnq.2.B.1_31@uc002hnl.1@uc002hnq.2.B.0', '31@uc002hnl.1@uc002hnq.2.A.0')	(0,0):622,(1,0):71	0.0493056	(0,0):781,(0,1):4,(1,0):47	0:47,1:4	17
AFE	64210@uc009xvt.1@uc001knt.1	ENSG00000155229	0.7	0.27	0.96	0.23	0.06	0.58	0.47	4.2	('6720@uc002grp.1@uc002grs.1.A.1_6720@uc002grp.1@uc002grs.1.A.0', '6720@uc002grp.1@uc002grs.1.B.0')	(0,0):1116,(1,0):120	0.0833333	(0,0):470,(0,1):1,(1,0):55	0:55,1:1	17
AFE	145508@uc001xuy.1@uc001xva.1	ENSG00000100629	0.87	0.64	0.99	0.45	0.18	0.76	0.42	4.19	('9734@uc010kue.1@uc003suc.1.A.0_9734@uc010kue.1@uc003suc.1.A.1_9734@uc010kue.1@uc003suc.1.A.2_9734@uc010kue.1@uc003suc.1.A.3', '9734@uc010kue.1@uc003suc.1.B.0_9734@uc010kue.1@uc003suc.1.B.1')	(0,0):262,(1,0):15	1904-01-01 00:15:00	(0,0):498,(0,1):3,(1,0):6	0:6,1:3	7
AFE	178@uc001dsn.1@uc001dsi.1	ENSG00000162688	0.1	0.01	0.39	0.48	0.26	0.74	-0.38	4.18	('2051@uc003wbv.1@uc003wbu.1.A.0', '2051@uc003wbv.1@uc003wbu.1.B.0_2051@uc003wbv.1@uc003wbu.1.B.1_2051@uc003wbv.1@uc003wbu.1.B.2')	(0,0):15,(0,1):7	0:0,1:7	(0,0):39,(0,1):6,(1,0):6	0:6,1:6	7
AFE	5214@uc009xht.1@uc009xhr.1	ENSG00000067057	0.3	0.13	0.55	0.73	0.36	0.97	-0.43	4.12	('6654@uc002rrj.2@uc002rrk.2.A.1_6654@uc002rrj.2@uc002rrk.2.A.0', '6654@uc002rrj.2@uc002rrk.2.B.0')	(0,0):4905,(0,1):4,(1,0):25	0:25,1:4	(0,0):2029,(1,0):19	1904-01-01 00:19:00	2
AFE	11343@uc003ejv.1@uc003ejx.1uc010hsp.1	ENSG00000074416	0.58	0.09	0.92	0.03	0	0.32	0.55	4.09	('6655@uc010ans.1@uc001wxt.2.A.3_6655@uc010ans.1@uc001wxt.2.A.2_6655@uc010ans.1@uc001wxt.2.A.1_6655@uc010ans.1@uc001wxt.2.A.0', '6655@uc010ans.1@uc001wxt.2.B.0')	(0,0):1175,(1,0):228	0.158333	(0,0):730,(0,1):3,(1,0):140	0:140,1:3	14
AFE	389125@uc003dga.2@uc003dgb.2	ENSG00000248592,ENSG00000213533,ENSG00000243696	0.21	0.04	0.46	0.59	0.27	0.88	-0.38	4.06	('11270@uc003rdr.1@uc003nrc.1.A.1_11270@uc003rdr.1@uc003nrc.1.A.0', '11270@uc003rdr.1@uc003nrc.1.B.0')	(0,0):682534,(0,1):7,(1,0):3	0:3,1:7	(0,0):488667,(0,1):1,(1,0):2	0:2,1:1	6
AFE	158427@uc004axp.1@uc004axn.1	ENSG00000136925	0.25	0.07	0.5	0.76	0.39	0.98	-0.51	4.05	('26173@uc003skm.1@uc003skn.2uc003skq.2.A.1_26173@uc003skm.1@uc003skn.2uc003skq.2.A.0', '26173@uc003skm.1@uc003skn.2uc003skq.2.B.1_26173@uc003skm.1@uc003skn.2uc003skq.2.B.0')	(0,0):1655,(0,1):4,(1,0):8	0:8,1:4	(0,0):1531,(1,0):13	1904-01-01 00:13:00	7
AFE	11064@uc004bkz.1uc004bla.1@uc004bky.1	ENSG00000119397	0.69	0.27	0.95	0.18	0.04	0.43	0.51	4.02	('23224@uc001xgq.1@uc001xgn.1.B.0_23224@uc001xgq.1@uc001xgn.1.B.1', '23224@uc001xgq.1@uc001xgn.1.A.0')	(0,0):127,(1,0):4	1904-01-01 00:04:00	(0,0):176,(0,1):2,(1,0):3	0:3,1:2	14
AFE	23623@uc001fks.2@uc001fkp.2uc001fkq.2	ENSG00000160753	0.31	0.18	0.47	0.57	0.42	0.74	-0.26	4.02	('10208@uc001ute.1@uc001utc.2.B.0_10208@uc001ute.1@uc001utc.2.B.1', '10208@uc001ute.1@uc001utc.2.A.0_10208@uc001ute.1@uc001utc.2.A.1_10208@uc001ute.1@uc001utc.2.A.2')	(0,0):831,(0,1):19,(1,0):10	0:10,1:19	(0,0):716,(0,1):12,(1,0):20	0:20,1:12	13
AFE	6195@uc009vsl.1@uc001bmr.1	ENSG00000117676	0.72	0.31	0.97	0.22	0.01	0.61	0.5	4.02	('55890@uc002jku.2@uc002jkp.1uc002jkq.1.A.0', '55890@uc002jku.2@uc002jkp.1uc002jkq.1.B.0')	(0,0):28,(1,0):2	1904-01-01 00:02:00	(0,0):72,(0,1):4,(1,0):1	0:1,1:4	17
AFE	5727@uc010mrn.1@uc010mrq.1	ENSG00000185920	0.78	0.65	0.89	0.55	0.39	0.7	0.23	4	('144132@uc001mdq.1@uc001mdp.1.B.0_144132@uc001mdq.1@uc001mdp.1.B.1', '144132@uc001mdq.1@uc001mdp.1.A.0')	(0,0):162,(0,1):8,(1,0):62	0:62,1:8	(0,0):123,(0,1):12,(1,0):30	0:30,1:12	11
AFE	10919@uc003scg.1@uc003nxx.1	ENSG00000137267,ENSG00000218472,ENSG00000260604,ENSG00000230648,ENSG00000237716,ENSG00000231811,ENSG00000260673,ENSG00000236336,ENSG00000220685,ENSG00000265083,ENSG00000264541,ENSG00000220446,ENSG00000218574,ENSG00000217239,ENSG00000216360,ENSG00000230770,ENSG00000239472,ENSG00000124785,ENSG00000241216,ENSG00000261211,ENSG00000224532,ENSG00000219986,ENSG00000240936,ENSG00000251762,ENSG00000201483…	0.73	0.33	0.99	0.24	0.07	0.53	0.49	3.99	('23224@uc001xgs.1@uc010apx.1.A.0', '23224@uc001xgs.1@uc010apx.1.B.0')	(0,0):921,(1,0):7	1904-01-01 00:07:00	(0,0):1091,(0,1):3,(1,0):6	0:6,1:3	14
AFE	54796@uc010mii.1uc003zmi.1uc003zmj.1uc003zmn.1@uc010mij.1	ENSG00000233551,ENSG00000173068	0.34	0.02	0.74	0.81	0.46	0.98	-0.47	3.99	('10509@uc002bpa.1@uc002boy.1.A.0_10509@uc002bpa.1@uc002boy.1.A.1', '10509@uc002bpa.1@uc002boy.1.B.0_10509@uc002bpa.1@uc002boy.1.B.1')	(0,0):149,(0,1):1,(1,0):1	0:1,1:1	(0,0):248,(1,0):9	1904-01-01 00:09:00	15
AFE	80324@uc001uji.1@uc001ujf.1	ENSG00000177192	0.58	0.14	0.9	0.11	0.01	0.43	0.47	3.99	('26095@uc009xmw.1@uc001jdt.1.A.4_26095@uc009xmw.1@uc001jdt.1.A.3_26095@uc009xmw.1@uc001jdt.1.A.2_26095@uc009xmw.1@uc001jdt.1.A.1_26095@uc009xmw.1@uc001jdt.1.A.0', '26095@uc009xmw.1@uc001jdt.1.B.1_26095@uc009xmw.1@uc001jdt.1.B.0')	(0,0):150,(1,0):1	1904-01-01 00:01:00	(0,0):265,(0,1):2,(1,0):2	0:2,1:2	10
AFE	55778@uc001ylt.2@uc001yls.2	ENSG00000022976	0.67	0.33	0.94	0.23	0.1	0.44	0.44	3.98	('83259@uc004fqp.1@uc010nwg.1.A.0', '83259@uc004fqp.1@uc010nwg.1.B.0_83259@uc004fqp.1@uc010nwg.1.B.1_83259@uc004fqp.1@uc010nwg.1.B.2')	(0,0):362,(0,1):1,(1,0):36	0:36,1:1	(0,0):704,(0,1):6,(1,0):25	0:25,1:6	Y
AFE	5727@uc010mrs.1@uc010mro.1	ENSG00000185920	0.59	0.04	0.96	0.01	0	0.06	0.58	3.95	('55031@uc001mjt.1@uc001mjq.1uc001mjr.1uc001mjs.1.B.0', '55031@uc001mjt.1@uc001mjq.1uc001mjr.1uc001mjs.1.A.0')	(0,0):3253,(1,0):30	1904-01-01 00:30:00	(0,0):3469,(0,1):5,(1,0):31	0:31,1:5	11
AFE	775@uc001qky.1@uc001qka.1	ENSG00000203648,ENSG00000256721,ENSG00000151067	0.8	0.39	0.97	0.39	0.18	0.62	0.41	3.95	('5727@uc010mrn.1@uc010mro.1.A.0', '5727@uc010mrn.1@uc010mro.1.B.2_5727@uc010mrn.1@uc010mro.1.B.1_5727@uc010mrn.1@uc010mro.1.B.0')	(0,0):108,(1,0):4	1904-01-01 00:04:00	(0,0):368,(0,1):7,(1,0):7	0:7,1:7	9
AFE	83259@uc004fqp.1@uc010nwg.1	ENSG00000252468,ENSG00000099715	0.93	0.84	0.98	0.7	0.52	0.86	0.23	3.95	('9659@uc001eme.1@uc001elo.2uc001emh.2uc001emk.2.A.2_9659@uc001eme.1@uc001elo.2uc001emh.2uc001emk.2.A.1_9659@uc001eme.1@uc001elo.2uc001emh.2uc001emk.2.A.0', '9659@uc001eme.1@uc001elo.2uc001emh.2uc001emk.2.B.0')	(0,0):4038,(0,1):1,(1,0):39	0:39,1:1	(0,0):4829,(0,1):7,(1,0):22	0:22,1:7	1
AFE	56996@uc003uwv.1@uc003uwq.2	ENSG00000146828	0.63	0.52	0.73	0.43	0.33	0.54	0.2	3.94	('22992@uc001oka.1@uc001ojy.1.B.0_22992@uc001oka.1@uc001ojy.1.B.1_22992@uc001oka.1@uc001ojy.1.B.2_22992@uc001oka.1@uc001ojy.1.B.3_22992@uc001oka.1@uc001ojy.1.B.4', '22992@uc001oka.1@uc001ojy.1.A.0')	(0,0):1723,(0,1):27,(1,0):70	0:70,1:27	(0,0):1703,(0,1):41,(1,0):47	0:47,1:41	11
AFE	91584@uc003vqz.2@uc003vra.2uc003vrc.2	ENSG00000221866	0.21	0.13	0.32	0.44	0.28	0.64	-0.23	3.89	('55249@uc001flg.1@uc001flm.1.A.0', '55249@uc001flg.1@uc001flm.1.B.2_55249@uc001flg.1@uc001flm.1.B.1_55249@uc001flg.1@uc001flm.1.B.0')	(0,0):2462,(0,1):18,(1,0):30	0:30,1:18	(0,0):1555,(0,1):8,(1,0):38	0:38,1:8	1
AFE	55615@uc003bez.1@uc003bew.1	ENSG00000241484,ENSG00000248405,ENSG00000186654	0.22	0.07	0.53	0.72	0.26	1	-0.5	3.87	('8481@uc010neo.1@uc004cvq.2.B.0_8481@uc010neo.1@uc004cvq.2.B.1_8481@uc010neo.1@uc004cvq.2.B.2_8481@uc010neo.1@uc004cvq.2.B.3_8481@uc010neo.1@uc004cvq.2.B.4_8481@uc010neo.1@uc004cvq.2.B.5_8481@uc010neo.1@uc004cvq.2.B.6', '8481@uc010neo.1@uc004cvq.2.A.0')	(0,0):287,(0,1):2,(1,0):124	0:124,1:2	(0,0):252,(1,0):79	0.0548611	X
AFE	8563@uc003afq.1@uc003afs.1	ENSG00000234208,ENSG00000100296	0.16	0.05	0.37	0.56	0.26	0.95	-0.4	3.87	('84033@uc001hsq.1@uc001hso.2.B.0', '84033@uc001hsq.1@uc001hso.2.A.0_84033@uc001hsq.1@uc001hso.2.A.1')	(0,0):92,(0,1):6,(1,0):5	0:5,1:6	(0,0):80,(0,1):1,(1,0):6	0:6,1:1	1
AFE	50624@uc001lgp.1@uc001lgs.1	ENSG00000138161,ENSG00000213185	0.93	0.83	0.99	0.6	0.34	0.88	0.33	3.86	('2550@uc003qzb.2uc003qzf.2@uc003nmw.2.B.5_2550@uc003qzb.2uc003qzf.2@uc003nmw.2.B.4_2550@uc003qzb.2uc003qzf.2@uc003nmw.2.B.3_2550@uc003qzb.2uc003qzf.2@uc003nmw.2.B.2_2550@uc003qzb.2uc003qzf.2@uc003nmw.2.B.1_2550@uc003qzb.2uc003qzf.2@uc003nmw.2.B.0', '2550@uc003qzb.2uc003qzf.2@uc003nmw.2.A.0')	(0,0):628727,(0,1):1,(1,0):37	0:37,1:1	(0,0):452655,(0,1):3,(1,0):7	0:7,1:3	6
AFE	4957@uc004bvh.1@uc004bvd.2	ENSG00000264891,ENSG00000136811	0.74	0.39	0.97	0.31	0.11	0.6	0.43	3.81	('7148@uc003sdl.1@uc003rls.2.A.0', '7148@uc003sdl.1@uc003rls.2.B.1_7148@uc003sdl.1@uc003rls.2.B.0')	(0,0):17009,(1,0):7	1904-01-01 00:07:00	(0,0):13058,(0,1):4,(1,0):5	0:5,1:4	6
AFE	54103@uc003uge.1@uc003ugg.1	ENSG00000186088	0.45	0.3	0.63	0.22	0.14	0.33	0.23	3.79	('1106@uc010bog.1uc010boh.1@uc002bsn.1uc002bso.1uc002bsp.1.B.0_1106@uc010bog.1uc010boh.1@uc002bsn.1uc002bso.1uc002bsp.1.B.1', '1106@uc010bog.1uc010boh.1@uc002bsn.1uc002bso.1uc002bsp.1.A.0')	(0,0):7251,(0,1):9,(1,0):443	0:443,1:9	(0,0):4349,(0,1):13,(1,0):235	0:235,1:13	15
AFE	79925@uc003jjr.1@uc003jjn.1uc003jjq.2uc003jjo.1	ENSG00000152582	0.73	0.33	0.96	0.26	0.08	0.49	0.47	3.79	('64210@uc001knq.1@uc001knt.1.A.0', '64210@uc001knq.1@uc001knt.1.B.1_64210@uc001knq.1@uc001knt.1.B.0')	(0,0):1114,(1,0):10	1904-01-01 00:10:00	(0,0):884,(0,1):4,(1,0):7	0:7,1:4	10
AFE	6720@uc002grp.1@uc002grs.1	ENSG00000072310	0.13	0.02	0.44	0.7	0.2	0.98	-0.57	3.77	('5727@uc010mrs.1@uc004avk.2.B.0', '5727@uc010mrs.1@uc004avk.2.A.0')	(0,0):58,(0,1):2	0:0,1:2	(0,0):177,(1,0):1	1904-01-01 00:01:00	9
AFE	5727@uc010mrs.1@uc004avl.2	ENSG00000185920	0.72	0.26	0.98	0.18	0.05	0.47	0.54	3.75	('54972@uc001nqm.1@uc001nqk.2uc001nql.1.A.0_54972@uc001nqm.1@uc001nqk.2uc001nql.1.A.1', '54972@uc001nqm.1@uc001nqk.2uc001nql.1.B.0')	(0,0):42,(1,0):20	1904-01-01 00:20:00	(0,0):59,(0,1):3,(1,0):9	0:9,1:3	11
AFE	29066@uc002dbh.1@uc002dbi.1	ENSG00000122299	0.49	0.11	0.85	0.07	0.01	0.31	0.42	3.72	('23049@uc010bwa.1@uc002dfm.1.A.2_23049@uc010bwa.1@uc002dfm.1.A.1_23049@uc010bwa.1@uc002dfm.1.A.0', '23049@uc010bwa.1@uc002dfm.1.B.0')	(0,0):6055,(1,0):25	1904-01-01 00:25:00	(0,0):4911,(0,1):3,(1,0):19	0:19,1:3	16
AFE	92799@uc002oof.1@uc002oob.1uc002ooc.1uc002ood.1	ENSG00000160410	0.57	0.35	0.76	0.87	0.71	0.97	-0.3	3.71	('57554@uc001deq.1@uc009wbg.1.A.0_57554@uc001deq.1@uc009wbg.1.A.1', '57554@uc001deq.1@uc009wbg.1.B.0_57554@uc001deq.1@uc009wbg.1.B.1_57554@uc001deq.1@uc009wbg.1.B.2_57554@uc001deq.1@uc009wbg.1.B.3_57554@uc001deq.1@uc009wbg.1.B.4_57554@uc001deq.1@uc009wbg.1.B.5_57554@uc001deq.1@uc009wbg.1.B.6_57554@uc001deq.1@uc009wbg.1.B.7_57554@uc001deq.1@uc009wbg.1.B.8_57554@uc001deq.1@uc009wbg.1.B.9_57554@uc00…	(0,0):1203,(0,1):7,(1,0):12	0:12,1:7	(0,0):3059,(0,1):2,(1,0):24	0:24,1:2	1
AFE	9905@uc002fuq.1@uc002fum.2uc002fun.2	ENSG00000141258	0.05	0.03	0.1	0.4	0.13	0.78	-0.35	3.71	('2185@uc010luq.1@uc003xfo.1.B.0_2185@uc010luq.1@uc003xfo.1.B.1_2185@uc010luq.1@uc003xfo.1.B.2_2185@uc010luq.1@uc003xfo.1.B.3_2185@uc010luq.1@uc003xfo.1.B.4_2185@uc010luq.1@uc003xfo.1.B.5', '2185@uc010luq.1@uc003xfo.1.A.0')	(0,0):1134,(0,1):9,(1,0):104	0:104,1:9	(0,0):1436,(0,1):1,(1,0):86	0:86,1:1	8
AFE	55860@uc010apc.1@uc001xdf.1	ENSG00000131966	0.73	0.37	0.99	0.28	0.14	0.5	0.45	3.69	('83259@uc004fqp.1@uc004fql.1.A.0', '83259@uc004fqp.1@uc004fql.1.B.0_83259@uc004fqp.1@uc004fql.1.B.1_83259@uc004fqp.1@uc004fql.1.B.2')	(0,0):362,(0,1):1,(1,0):36	0:36,1:1	(0,0):704,(0,1):6,(1,0):25	0:25,1:6	Y
AFE	55076@uc003dtz.1@uc003dua.1	ENSG00000181458	0.76	0.23	0.97	0.31	0.06	0.62	0.45	3.68	('94121@uc004egc.1@uc010nnc.1.A.0', '94121@uc004egc.1@uc010nnc.1.B.1_94121@uc004egc.1@uc010nnc.1.B.0')	(0,0):196,(1,0):3	1904-01-01 00:03:00	(0,0):293,(0,1):3,(1,0):2	0:2,1:3	X
AFE	144132@uc001mdu.2@uc001mdq.1	ENSG00000265264,ENSG00000179532	0.54	0.45	0.64	0.77	0.61	0.9	-0.23	3.66	('64764@uc003vtv.1@uc003vtw.1uc003vtx.1uc003vty.2.B.0', '64764@uc003vtv.1@uc003vtw.1uc003vtx.1uc003vty.2.A.1_64764@uc003vtv.1@uc003vtw.1uc003vtx.1uc003vty.2.A.0')	(0,0):882,(0,1):29,(1,0):108	0:108,1:29	(0,0):615,(0,1):4,(1,0):45	0:45,1:4	7
AFE	54206@uc001apa.1@uc001aoz.1	ENSG00000116285	0.15	0.05	0.3	0.53	0.23	0.83	-0.38	3.62	('9399@uc002awe.1uc002awf.1uc010bje.1uc002awh.1uc002awg.1@uc002awi.1.B.2_9399@uc002awe.1uc002awf.1uc010bje.1uc002awh.1uc002awg.1@uc002awi.1.B.1_9399@uc002awe.1uc002awf.1uc010bje.1uc002awh.1uc002awg.1@uc002awi.1.B.0', '9399@uc002awe.1uc002awf.1uc010bje.1uc002awh.1uc002awg.1@uc002awi.1.A.0')	(0,0):68,(0,1):10,(1,0):6	0:6,1:10	(0,0):51,(0,1):2,(1,0):9	0:9,1:2	15
AFE	6103@uc004dee.1@uc004deb.1uc004ded.1	ENSG00000252050,ENSG00000156313	0.01	0	0.05	0.5	0.09	0.97	-0.49	3.61	('10458@uc002jzh.1@uc0444.uc002jzg.1.A.0', '10458@uc002jzh.1@uc0445.uc002jzg.1.B.0')	(0,0):398,(0,1):7,(1,0):5	0:5,1:7	(0,0):686,(1,0):4	1904-01-01 00:04:00	17
AFE	80325@uc010hsm.1@uc003ejr.1	ENSG00000114626	0.86	0.57	0.99	0.44	0.24	0.69	0.42	3.6	('64210@uc009xvt.1@uc001knt.1.A.4_64210@uc009xvt.1@uc001knt.1.A.3_64210@uc009xvt.1@uc001knt.1.A.2_64210@uc009xvt.1@uc001knt.1.A.1_64210@uc009xvt.1@uc001knt.1.A.0', '64210@uc009xvt.1@uc001knt.1.B.1_64210@uc009xvt.1@uc001knt.1.B.0')	(0,0):263,(1,0):40	1904-01-01 00:40:00	(0,0):242,(0,1):4,(1,0):29	0:29,1:4	10
AFE	23077@uc010aev.1@uc001vkf.1	ENSG00000005810	0.91	0.68	1	0.55	0.33	0.78	0.36	3.59	('55076@uc003dtz.1@uc003dua.1.A.0_55076@uc003dtz.1@uc003dua.1.A.1', '55076@uc003dtz.1@uc003dua.1.B.0_55076@uc003dtz.1@uc003dua.1.B.1')	(0,0):342,(1,0):57	1904-01-01 00:57:00	(0,0):491,(0,1):4,(1,0):36	0:36,1:4	3
AFE	89910@uc001tot.1@uc001tom.2uc001top.1	ENSG00000151148	0.76	0.62	0.89	0.96	0.87	1	-0.2	3.53	('9659@uc001emf.1@uc001eln.2uc001elx.2.B.0', '9659@uc001emf.1@uc001eln.2uc001elx.2.A.1_9659@uc001emf.1@uc001eln.2uc001elx.2.A.0')	(0,0):3448,(0,1):6,(1,0):62	0:62,1:6	(0,0):3658,(1,0):69	0.0479167	1
AFE	54840@uc003zrk.1@uc003zrr.1	ENSG00000137074	0.41	0.08	0.73	0.85	0.59	0.98	-0.44	3.52	('23191@uc001yut.1@uc010aya.1.A.0_23191@uc001yut.1@uc010aya.1.A.1_23191@uc001yut.1@uc010aya.1.A.2', '23191@uc001yut.1@uc010aya.1.B.0')	(0,0):179,(0,1):2,(1,0):1	0:1,1:2	(0,0):241,(1,0):7	1904-01-01 00:07:00	15
AFE	9581@uc002ruf.1uc002rug.1uc002ruh.1@uc010fax.1	ENSG00000138078	0.69	0.23	0.92	0.25	0.09	0.57	0.44	3.52	('57458@uc001tdi.2@uc001tdj.2.A.1_57458@uc001tdi.2@uc001tdj.2.A.0', '57458@uc001tdi.2@uc001tdj.2.B.0')	(0,0):99,(1,0):16	1904-01-01 00:16:00	(0,0):342,(0,1):4,(1,0):61	0:61,1:4	12
AFE	23191@uc001yut.1@uc010aya.1	ENSG00000068793	0.23	0.14	0.34	0.51	0.32	0.74	-0.28	3.48	('1981@uc010hxz.1@uc010hxy.1.A.0_1981@uc010hxz.1@uc010hxy.1.A.1', '1981@uc010hxz.1@uc010hxy.1.B.0_1981@uc010hxz.1@uc010hxy.1.B.1')	(0,0):681,(0,1):13,(1,0):67	0:67,1:13	(0,0):706,(0,1):5,(1,0):84	0:84,1:5	3
AFE	5727@uc010mrn.1@uc010mro.1	ENSG00000185920	0.62	0.19	0.95	0.21	0.06	0.55	0.41	3.48	('3145@uc001pvc.1@uc001pvf.1.A.0_3145@uc001pvc.1@uc001pvf.1.A.1', '3145@uc001pvc.1@uc001pvf.1.B.0_3145@uc001pvc.1@uc001pvf.1.B.1')	(0,0):212,(1,0):37	1904-01-01 00:37:00	(0,0):230,(0,1):2,(1,0):30	0:30,1:2	11
AFE	8777@uc003zkz.2@uc003zlb.2	ENSG00000234740,ENSG00000107186	0.48	0.25	0.75	0.86	0.57	1	-0.38	3.46	('163486@uc001gug.2@uc001guf.2.A.3_163486@uc001gug.2@uc001guf.2.A.2_163486@uc001gug.2@uc001guf.2.A.1_163486@uc001gug.2@uc001guf.2.A.0', '163486@uc001gug.2@uc001guf.2.B.0')	(0,0):860,(0,1):5,(1,0):7	0:7,1:5	(0,0):955,(1,0):8	1904-01-01 00:08:00	1
AFE	2217@uc002poi.1@uc002pof.1	ENSG00000104870	0.7	0.51	0.86	0.4	0.21	0.6	0.3	3.43	('153129@uc003jqd.1@uc003jqf.1.B.2_153129@uc003jqd.1@uc003jqf.1.B.1_153129@uc003jqd.1@uc003jqf.1.B.0', '153129@uc003jqd.1@uc003jqf.1.A.1_153129@uc003jqd.1@uc003jqf.1.A.0')	(0,0):559,(0,1):6,(1,0):20	0:20,1:6	(0,0):427,(0,1):11,(1,0):10	0:10,1:11	5
AFE	5143@uc010ebk.1@uc002nil.2	ENSG00000105650	0.31	0.1	0.65	0.75	0.36	0.98	-0.44	3.42	('115677@uc002uek.1@uc002uej.1.A.0', '115677@uc002uek.1@uc002uej.1.B.0_115677@uc002uek.1@uc002uej.1.B.1_115677@uc002uek.1@uc002uej.1.B.2_115677@uc002uek.1@uc002uej.1.B.3_115677@uc002uek.1@uc002uej.1.B.4')	(0,0):354,(0,1):2,(1,0):5	0:5,1:2	(0,0):369,(1,0):7	1904-01-01 00:07:00	2
AFE	340348@uc003voq.1@uc003vop.1	ENSG00000200629,ENSG00000158457	0.85	0.68	0.97	0.55	0.37	0.77	0.3	3.41	('9374@uc003rme.1@uc010kqr.1.A.0_9374@uc003rme.1@uc010kqr.1.A.1', '9374@uc003rme.1@uc010kqr.1.B.0')	(0,0):7021,(0,1):1,(1,0):96	0:96,1:1	(0,0):4968,(0,1):5,(1,0):60	0:60,1:5	6
AFE	55249@uc001flg.1@uc001flm.1	ENSG00000163374	0.75	0.36	0.97	0.28	0.08	0.65	0.47	3.41	('23133@uc004dsv.2@uc004dsy.2.B.1_23133@uc004dsv.2@uc004dsy.2.B.0', '23133@uc004dsv.2@uc004dsy.2.A.0')	(0,0):170,(1,0):4	1904-01-01 00:04:00	(0,0):165,(0,1):3,(1,0):4	0:4,1:3	X
AFE	23635@uc003khn.1@uc003kho.1uc003khp.1	ENSG00000145687	0.05	0.02	0.12	0.61	0.11	0.97	-0.56	3.4	('3843@uc001vng.1@uc001vnf.1.A.0', '3843@uc001vng.1@uc001vnf.1.B.0')	(0,0):3608,(0,1):6,(1,0):37	0:37,1:6	(0,0):2985,(1,0):23	1904-01-01 00:23:00	13
AFE	1106@uc010bog.1uc010boh.1@uc002bsn.1uc002bso.1uc002bsp.1	ENSG00000264173,ENSG00000173575	0.09	0.03	0.29	0.59	0.14	0.95	-0.5	3.38	('145508@uc001xuy.1@uc001xux.1.B.1_145508@uc001xuy.1@uc001xux.1.B.0', '145508@uc001xuy.1@uc001xux.1.A.0')	(0,0):426,(0,1):3,(1,0):19	0:19,1:3	(0,0):327,(1,0):8	1904-01-01 00:08:00	14
AFE	80864@uc003rmj.1@uc003sdz.1	ENSG00000241404,ENSG00000204308,ENSG00000237285,ENSG00000223335,ENSG00000225914,ENSG00000258388	0.38	0.3	0.47	0.58	0.45	0.69	-0.2	3.38	('8027@uc009xjw.1@uc001ipj.1.A.0_8027@uc009xjw.1@uc001ipj.1.A.1_8027@uc009xjw.1@uc001ipj.1.A.2', '8027@uc009xjw.1@uc001ipj.1.B.0')	(0,0):3494,(0,1):46,(1,0):89	0:89,1:46	(0,0):4132,(0,1):21,(1,0):89	0:89,1:21	10
AFE	3257@uc001kpj.1@uc001kpi.1uc001kpk.1uc001kpl.1	ENSG00000107521	0.27	0.12	0.53	0.76	0.27	0.99	-0.49	3.37	('57579@uc003pfp.2@uc003pfh.2.B.0_57579@uc003pfp.2@uc003pfh.2.B.1_57579@uc003pfp.2@uc003pfh.2.B.2', '57579@uc003pfp.2@uc003pfh.2.A.0')	(0,0):4695,(0,1):4,(1,0):39	0:39,1:4	(0,0):2005,(1,0):13	1904-01-01 00:13:00	6
AFE	401548@uc004bgi.2@uc004bgj.2	ENSG00000148158	0.28	0.06	0.66	0.67	0.35	0.96	-0.39	3.37	('26716@uc010jri.1@uc003qyw.1.B.0_26716@uc010jri.1@uc003qyw.1.B.1_26716@uc010jri.1@uc003qyw.1.B.2', '26716@uc010jri.1@uc003qyw.1.A.0_26716@uc010jri.1@uc003qyw.1.A.1')	(0,0):627314,(0,1):2,(1,0):2	0:2,1:2	(0,0):452034,(0,1):1,(1,0):12	0:12,1:1	6
AFE	6130@uc004cdf.1@uc004cde.1	ENSG00000206611,ENSG00000200831,ENSG00000199744,ENSG00000148303	0.24	0.01	0.76	0.72	0.38	0.98	-0.48	3.37	('10801@uc010dhd.1@uc002jtv.1.A.0', '10801@uc010dhd.1@uc002jtv.1.B.0')	(0,0):603,(0,1):1	0:0,1:1	(0,0):799,(1,0):7	1904-01-01 00:07:00	17
AFE	84451@uc001hvu.2@uc001hvs.1uc001hvt.2	ENSG00000143674	0.15	0.09	0.25	0.52	0.21	0.91	-0.37	3.36	('54206@uc001apa.1@uc001aoz.1.A.1_54206@uc001apa.1@uc001aoz.1.A.0', '54206@uc001apa.1@uc001aoz.1.B.1_54206@uc001apa.1@uc001aoz.1.B.0')	(0,0):86,(0,1):9,(1,0):64,(1,1):5	0:64,1:14	(0,0):115,(0,1):1,(1,0):74,(1,1):4	0:77,1:2	1
AFE	31@uc002hnl.1@uc002hnq.2	ENSG00000132142	0.5	0.29	0.82	0.19	0.08	0.32	0.31	3.34	('64319@uc002dzc.2@uc002dzd.2.A.0_64319@uc002dzc.2@uc002dzd.2.A.1_64319@uc002dzc.2@uc002dzd.2.A.2_64319@uc002dzc.2@uc002dzd.2.A.3_64319@uc002dzc.2@uc002dzd.2.A.4', '64319@uc002dzc.2@uc002dzd.2.B.0_64319@uc002dzc.2@uc002dzd.2.B.1')	(0,0):454,(0,1):3,(1,0):31	0:31,1:3	(0,0):366,(0,1):9,(1,0):19	0:19,1:9	16
AFE	29062@uc010lmq.1@uc003vsp.1	ENSG00000105875	0.03	0	0.08	0.42	0.1	0.87	-0.39	3.33	('283933@uc002eby.1@uc002ebz.1.B.1_283933@uc002eby.1@uc002ebz.1.B.0', '283933@uc002eby.1@uc002ebz.1.A.0')	(0,0):17,(0,1):5,(1,0):1	0:1,1:5	(0,0):26,(0,1):1,(1,0):8	0:8,1:1	16
AFE	84166@uc002ekq.1@uc002ekk.1	ENSG00000140853	0.21	0.1	0.37	0.51	0.28	0.79	-0.3	3.33	('51463@uc001epx.2@uc001epv.2.B.0', '51463@uc001epx.2@uc001epv.2.A.0')	(0,0):447,(0,1):7,(1,0):10	0:10,1:7	(0,0):397,(0,1):3,(1,0):19	0:19,1:3	1
AFE	51466@uc001ygv.1@uc010avu.1	ENSG00000199082,ENSG00000196405	0.18	0.08	0.37	0.56	0.26	0.9	-0.38	3.3	('9581@uc002ruf.1uc002rug.1uc002ruh.1@uc010fax.1.B.1_9581@uc002ruf.1uc002rug.1uc002ruh.1@uc010fax.1.B.0', '9581@uc002ruf.1uc002rug.1uc002ruh.1@uc010fax.1.A.0')	(0,0):91,(1,0):16,(1,1):10	0:17,1:9	(0,0):75,(1,0):21,(1,1):3	1904-01-01 00:24:00	2
AFE	80325@uc010hsm.1@uc003eju.1	ENSG00000114626	0.66	0.34	0.94	0.25	0.09	0.57	0.41	3.29	('3257@uc001kpj.1@uc001kpi.1uc001kpk.1uc001kpl.1.B.1_3257@uc001kpj.1@uc001kpi.1uc001kpk.1uc001kpl.1.B.0', '3257@uc001kpj.1@uc001kpi.1uc001kpk.1uc001kpl.1.A.0')	(0,0):536,(0,1):1,(1,0):30	0:30,1:1	(0,0):402,(0,1):4,(1,0):14	0:14,1:4	10
AFE	1801@uc002ftu.1@uc010cjx.1	ENSG00000108963	0.29	0.21	0.38	0.55	0.34	0.78	-0.26	3.28	('861@uc002yul.1@uc002yuh.1uc002yui.1uc002yuo.1.B.0', '861@uc002yul.1@uc002yuh.1uc002yui.1uc002yuo.1.A.0')	(0,0):9052,(0,1):22,(1,0):1440	0:1440,1:22	(0,0):3679,(0,1):3,(1,0):636	0:636,1:3	21
AFE	4439@uc003nwy.1@uc003rjk.1	ENSG00000219992,ENSG00000233068,ENSG00000217135,ENSG00000217566,ENSG00000216657,ENSG00000145965,ENSG00000252668,ENSG00000216307,ENSG00000201185,ENSG00000260239,ENSG00000205444,ENSG00000238801,ENSG00000217385,ENSG00000217030,ENSG00000219607,ENSG00000215057,ENSG00000264121,ENSG00000263572,ENSG00000218868,ENSG00000203498,ENSG00000225092,ENSG00000219993,ENSG00000236512,ENSG00000219294,ENSG00000251164…	0.65	0.22	0.95	0.15	0.03	0.58	0.5	3.28	('22832@uc003pki.2@uc010kbp.1uc003pkk.2.A.5_22832@uc003pki.2@uc010kbp.1uc003pkk.2.A.4_22832@uc003pki.2@uc010kbp.1uc003pkk.2.A.3_22832@uc003pki.2@uc010kbp.1uc003pkk.2.A.2_22832@uc003pki.2@uc010kbp.1uc003pkk.2.A.1_22832@uc003pki.2@uc010kbp.1uc003pkk.2.A.0', '22832@uc003pki.2@uc010kbp.1uc003pkk.2.B.1_22832@uc003pki.2@uc010kbp.1uc003pkk.2.B.0')	(0,0):398,(1,0):40	1904-01-01 00:40:00	(0,0):463,(0,1):2,(1,0):36	0:36,1:2	6
AFE	57579@uc010kan.1@uc003pfl.2	ENSG00000238386,ENSG00000082269	0.56	0.24	0.86	0.17	0.07	0.34	0.39	3.27	('1801@uc002ftw.2@uc010cjx.1.B.0_1801@uc002ftw.2@uc010cjx.1.B.1_1801@uc002ftw.2@uc010cjx.1.B.2_1801@uc002ftw.2@uc010cjx.1.B.3', '1801@uc002ftw.2@uc010cjx.1.A.0')	(0,0):402,(0,1):1,(1,0):38	0:38,1:1	(0,0):283,(0,1):5,(1,0):31	0:31,1:5	17
AFE	7148@uc003sdl.1@uc003rls.2	ENSG00000204390,ENSG00000204386,ENSG00000204366,ENSG00000204356,ENSG00000221267,ENSG00000204348,ENSG00000233627,ENSG00000248290,ENSG00000229776,ENSG00000252512,ENSG00000204385,ENSG00000168477,ENSG00000213676,ENSG00000204371	0.9	0.78	0.98	0.6	0.37	0.87	0.3	3.25	('4957@uc004bvh.1@uc004bve.1.A.0', '4957@uc004bvh.1@uc004bve.1.B.0_4957@uc004bvh.1@uc004bve.1.B.1')	(0,0):3495,(0,1):1,(1,0):46	0:46,1:1	(0,0):1734,(0,1):4,(1,0):18	0:18,1:4	9
AFE	122786@uc001wzg.1@uc001wzb.1	ENSG00000252400,ENSG00000251756,ENSG00000139926	0.67	0.36	0.91	0.29	0.15	0.49	0.38	3.23	('56996@uc003uwu.1@uc003uwq.2.A.0_56996@uc003uwu.1@uc003uwq.2.A.1_56996@uc003uwu.1@uc003uwq.2.A.2_56996@uc003uwu.1@uc003uwq.2.A.3_56996@uc003uwu.1@uc003uwq.2.A.4', '56996@uc003uwu.1@uc003uwq.2.B.0_56996@uc003uwu.1@uc003uwq.2.B.1')	(0,0):182,(0,1):1,(1,0):145	0:145,1:1	(0,0):190,(0,1):5,(1,0):119	0:119,1:5	7
AFE	64210@uc001knq.1@uc001knt.1	ENSG00000155229	0.05	0	0.16	0.28	0.12	0.54	-0.23	3.22	('113277@uc002idn.1@uc010dja.1.B.0_113277@uc002idn.1@uc010dja.1.B.1_113277@uc002idn.1@uc010dja.1.B.2', '113277@uc002idn.1@uc010dja.1.A.0_113277@uc002idn.1@uc010dja.1.A.1_113277@uc002idn.1@uc010dja.1.A.2')	(0,0):1228698,(0,1):22	0:0,1:22	(0,0):1001414,(0,1):8,(1,0):3	0:3,1:8	17
AFE	152503@uc003imb.2@uc003ime.2	ENSG00000109686	0.64	0.34	0.92	0.25	0.13	0.46	0.39	3.21	('56996@uc003uwv.1@uc003uwq.2.A.0', '56996@uc003uwv.1@uc003uwq.2.B.0_56996@uc003uwv.1@uc003uwq.2.B.1')	(0,0):260,(0,1):1,(1,0):67	0:67,1:1	(0,0):245,(0,1):5,(1,0):64	0:64,1:5	7
AFE	161823@uc001zri.1@uc001zrh.1	ENSG00000168803	0.74	0.46	0.94	0.35	0.2	0.6	0.39	3.21	('56996@uc003uwr.1@uc003uwq.2.A.0_56996@uc003uwr.1@uc003uwq.2.A.1', '56996@uc003uwr.1@uc003uwq.2.B.0_56996@uc003uwr.1@uc003uwq.2.B.1')	(0,0):120,(0,1):1,(1,0):100	0:100,1:1	(0,0):125,(0,1):5,(1,0):71	0:71,1:5	7
AFE	256356@uc003eup.1@uc003euq.1	ENSG00000175066	0.27	0.11	0.46	0.65	0.29	0.98	-0.38	3.21	('7222@uc003ief.1@uc003ieg.1.A.0', '7222@uc003ief.1@uc003ieg.1.B.0')	(0,0):161,(0,1):4,(1,0):24	0:24,1:4	(0,0):100,(1,0):5	1904-01-01 00:05:00	4
AFE	8795@uc003xcs.1@uc003xcv.1	ENSG00000120889	0.53	0.37	0.72	0.84	0.62	1	-0.31	3.21	('6195@uc009vsl.1@uc001bmr.1.A.0_6195@uc009vsl.1@uc001bmr.1.A.1_6195@uc009vsl.1@uc001bmr.1.A.2_6195@uc009vsl.1@uc001bmr.1.A.3_6195@uc009vsl.1@uc001bmr.1.A.4_6195@uc009vsl.1@uc001bmr.1.A.5_6195@uc009vsl.1@uc001bmr.1.A.6', '6195@uc009vsl.1@uc001bmr.1.B.0')	(0,0):966,(0,1):8,(1,0):201	0:201,1:8	(0,0):803,(0,1):1,(1,0):182	0:182,1:1	1
AFE	2185@uc010luq.1@uc003xfp.1	ENSG00000120899	0.78	0.48	0.98	0.42	0.22	0.7	0.36	3.19	('6880@uc003jwc.1@uc003jwa.1.A.1_6880@uc003jwc.1@uc003jwa.1.A.0', '6880@uc003jwc.1@uc003jwa.1.B.0')	(0,0):1576,(1,0):3859	2.67986	(0,0):1153,(0,1):3,(1,0):3561	0:3561,1:3	5
AFE	22832@uc003pki.2@uc010kbp.1uc003pkk.2	ENSG00000135315	0.78	0.39	0.95	0.36	0.15	0.62	0.42	3.18	('6880@uc003mol.1@uc003moq.1.B.2_6880@uc003mol.1@uc003moq.1.B.1_6880@uc003mol.1@uc003moq.1.B.0', '6880@uc003mol.1@uc003moq.1.A.0')	(0,0):1767,(1,0):3829	2.65903	(0,0):1308,(0,1):3,(1,0):3524	0:3524,1:3	5
AFE	54856@uc001flx.1@uc009wri.1	ENSG00000116580	0.44	0.26	0.66	0.82	0.43	0.98	-0.38	3.18	('5607@uc002aqx.1@uc002aqt.1uc002aqu.1uc002aqv.1.B.0', '5607@uc002aqx.1@uc002aqt.1uc002aqu.1uc002aqv.1.A.0_5607@uc002aqx.1@uc002aqt.1uc002aqu.1uc002aqv.1.A.1_5607@uc002aqx.1@uc002aqt.1uc002aqu.1uc002aqv.1.A.2')	(0,0):748,(0,1):6,(1,0):27	0:27,1:6	(0,0):754,(1,0):14	1904-01-01 00:14:00	15
AFE	1445@uc010bkc.1@uc010bkb.1	ENSG00000103653	0.2	0.13	0.28	0.4	0.26	0.56	-0.2	3.17	('54103@uc003uge.1@uc003ugg.1.A.3_54103@uc003uge.1@uc003ugg.1.A.2_54103@uc003uge.1@uc003ugg.1.A.1_54103@uc003uge.1@uc003ugg.1.A.0', '54103@uc003uge.1@uc003ugg.1.B.7_54103@uc003uge.1@uc003ugg.1.B.6_54103@uc003uge.1@uc003ugg.1.B.5_54103@uc003uge.1@uc003ugg.1.B.4_54103@uc003uge.1@uc003ugg.1.B.3_54103@uc003uge.1@uc003ugg.1.B.2_54103@uc003uge.1@uc003ugg.1.B.1_54103@uc003uge.1@uc003ugg.1.B.0')	(0,0):540,(0,1):38,(1,0):34	0:34,1:38	(0,0):480,(0,1):12,(1,0):28	0:28,1:12	7
AFE	57553@uc010grd.1@uc002znl.1	ENSG00000207780,ENSG00000235445,ENSG00000093100,ENSG00000243156	0.08	0.04	0.12	0.37	0.12	0.67	-0.29	3.17	('6470@uc002gtc.1@uc002gtd.1.A.0', '6470@uc002gtc.1@uc002gtd.1.B.2_6470@uc002gtc.1@uc002gtd.1.B.1_6470@uc002gtc.1@uc002gtd.1.B.0')	(0,0):400,(0,1):20,(1,0):32	0:32,1:20	(0,0):399,(0,1):3,(1,0):26	0:26,1:3	17
AFE	11152@uc004dmn.1@uc004dmo.1	ENSG00000250232,ENSG00000196998	0.73	0.34	0.98	0.23	0.07	0.55	0.5	3.16	('23224@uc001xgt.1@uc010apx.1.A.0', '23224@uc001xgt.1@uc010apx.1.B.0')	(0,0):1012,(1,0):26	1904-01-01 00:26:00	(0,0):1145,(0,1):3,(1,0):12	0:12,1:3	14
AFE	1789@uc002wyc.1uc002wyd.1uc002wye.1@uc002wyf.1	ENSG00000088305	0.1	0.01	0.5	0.5	0.15	0.92	-0.4	3.15	('54014@uc010god.1@uc010goi.1.A.0', '54014@uc010god.1@uc010goi.1.B.0')	(0,0):4641,(0,1):2,(1,0):5	0:5,1:2	(0,0):2934,(1,0):4	1904-01-01 00:04:00	21
AFE	5339@uc003zab.1@uc003zai.1	ENSG00000207574,ENSG00000178209	0.09	0.03	0.22	0.59	0.12	0.91	-0.5	3.15	('6654@uc002rrl.1@uc002rrk.2.A.0', '6654@uc002rrl.1@uc002rrk.2.B.0')	(0,0):3402,(0,1):4,(1,0):100	0:100,1:4	(0,0):1385,(1,0):39	1904-01-01 00:39:00	2
AFE	83637@uc003tlu.1@uc003tlq.1	ENSG00000122515	0.06	0.01	0.24	0.51	0.07	0.89	-0.45	3.15	('9696@uc009voz.1@uc001azt.2.A.0_9696@uc009voz.1@uc001azt.2.A.1_9696@uc009voz.1@uc001azt.2.A.2_9696@uc009voz.1@uc001azt.2.A.3_9696@uc009voz.1@uc001azt.2.A.4', '9696@uc009voz.1@uc001azt.2.B.0')	(0,0):301,(0,1):4,(1,0):28	0:28,1:4	(0,0):157,(1,0):8	1904-01-01 00:08:00	1
AFE	23224@uc010apx.1@uc010apw.1	ENSG00000054654	0.84	0.53	1	0.44	0.13	0.74	0.4	3.14	('254887@uc003eaw.1@uc003eav.1.B.0_254887@uc003eaw.1@uc003eav.1.B.1_254887@uc003eaw.1@uc003eav.1.B.2', '254887@uc003eaw.1@uc003eav.1.A.0')	(0,0):254,(1,0):14	1904-01-01 00:14:00	(0,0):195,(0,1):2,(1,0):3	0:3,1:2	3
AFE	29@uc002fsg.1@uc010cjq.1	ENSG00000159842	0.51	0.14	0.85	0.1	0.01	0.34	0.41	3.14	('6810@uc002eal.1@uc002eak.1.B.0_6810@uc002eal.1@uc002eak.1.B.1', '6810@uc002eal.1@uc002eak.1.A.0')	(0,0):40,(0,1):2,(1,0):3	0:3,1:2	(0,0):27,(0,1):6	0:0,1:6	16
AFE	64221@uc001qbd.1@uc001qbc.1	ENSG00000154134	0.13	0	0.45	0.67	0.18	0.97	-0.54	3.14	('29@uc002fsg.1@uc010cjq.1.B.0', '29@uc002fsg.1@uc010cjq.1.A.0')	(0,0):19,(0,1):1	0:0,1:1	(0,0):48,(1,0):2	1904-01-01 00:02:00	17
AFE	57553@uc010grd.1@uc002znh.2	ENSG00000207780,ENSG00000235445,ENSG00000234913,ENSG00000093100,ENSG00000243156	0.53	0.21	0.87	0.14	0.06	0.29	0.39	3.13	('2145@uc010cyr.1@uc002iaz.1uc002iba.1uc010cyq.1uc010cys.1.A.3_2145@uc010cyr.1@uc002iaz.1uc002iba.1uc010cyq.1uc010cys.1.A.2_2145@uc010cyr.1@uc002iaz.1uc002iba.1uc010cyq.1uc010cys.1.A.1_2145@uc010cyr.1@uc002iaz.1uc002iba.1uc010cyq.1uc010cys.1.A.0', '2145@uc010cyr.1@uc002iaz.1uc002iba.1uc010cyq.1uc010cys.1.B.2_2145@uc010cyr.1@uc002iaz.1uc002iba.1uc010cyq.1uc010cys.1.B.1_2145@uc010cyr.1@uc002iaz.1uc…	(0,0):208,(0,1):2,(1,0):18	0:18,1:2	(0,0):285,(0,1):9,(1,0):12	0:12,1:9	17
AFE	5218@uc003ukv.1@uc003uky.1	ENSG00000223584,ENSG00000058091	0.13	0.02	0.36	0.63	0.2	0.99	-0.5	3.12	('64708@uc002vsk.1@uc010fxy.1.A.0', '64708@uc002vsk.1@uc010fxy.1.B.0')	(0,0):425,(0,1):2,(1,0):16	0:16,1:2	(0,0):323,(1,0):18	1904-01-01 00:18:00	2
AFE	57730@uc010fid.1@uc010fie.1	ENSG00000235833,ENSG00000196912	0.55	0.3	0.81	0.23	0.11	0.41	0.32	3.12	('79902@uc002jnh.1@uc002jng.1uc010dgd.1.A.0_79902@uc002jnh.1@uc002jng.1uc010dgd.1.A.1_79902@uc002jnh.1@uc002jng.1uc010dgd.1.A.2', '79902@uc002jnh.1@uc002jng.1uc010dgd.1.B.0')	(0,0):1258,(0,1):2,(1,0):50	0:50,1:2	(0,0):1219,(0,1):7,(1,0):32	0:32,1:7	17
AFE	11273@uc002drg.1@uc002drf.1	ENSG00000168488	0.32	0.16	0.54	0.07	0.01	0.18	0.25	3.11	('122786@uc001wzg.1@uc001wzb.1.B.0_122786@uc001wzg.1@uc001wzb.1.B.1_122786@uc001wzg.1@uc001wzb.1.B.2', '122786@uc001wzg.1@uc001wzb.1.A.0_122786@uc001wzg.1@uc001wzb.1.A.1')	(0,0):408,(0,1):7,(1,0):7	0:7,1:7	(0,0):889,(0,1):10,(1,0):1	0:1,1:10	14
AFE	57730@uc010fie.1@uc002sxy.1	ENSG00000196912	0.74	0.31	0.98	0.29	0.04	0.69	0.45	3.11	('114897@uc002jwq.1@uc002jwt.1.B.0', '114897@uc002jwq.1@uc002jwt.1.A.0_114897@uc002jwq.1@uc002jwt.1.A.1')	(0,0):30,(1,0):1	1904-01-01 00:01:00	(0,0):113,(0,1):2,(1,0):1	0:1,1:2	17
AFE	94121@uc004egc.1@uc010nnc.1	ENSG00000102362	0.7	0.33	0.95	0.29	0.07	0.89	0.41	3.11	('80184@uc001taq.1@uc001tat.2.A.0', '80184@uc001taq.1@uc001tat.2.B.0')	(0,0):481,(1,0):34	1904-01-01 00:34:00	(0,0):390,(0,1):1,(1,0):21	0:21,1:1	12
AFE	165631@uc003efo.1@uc003efm.2uc003efn.2	ENSG00000173200	0.14	0.02	0.4	0.59	0.15	0.97	-0.45	3.09	('9732@uc003vfv.1@uc003vfx.1uc003vfy.1uc010ljt.1.A.0', '9732@uc003vfv.1@uc003vfx.1uc003vfy.1uc010ljt.1.B.0')	(0,0):1038,(0,1):3,(1,0):2	0:2,1:3	(0,0):1915,(1,0):2	1904-01-01 00:02:00	7
AFE	10411@uc001rpw.1@uc001rpx.1	ENSG00000079337	0.23	0.16	0.32	0.52	0.29	0.81	-0.29	3.08	('26020@uc001whe.2@uc001whd.1.B.0', '26020@uc001whe.2@uc001whd.1.A.0')	(0,0):149,(0,1):23,(1,0):182	0:182,1:23	(0,0):96,(0,1):3,(1,0):90	0:90,1:3	14
AFE	23191@uc001yuu.1@uc001yut.1	ENSG00000068793	0.78	0.36	0.99	0.38	0.09	0.69	0.4	3.08	('57501@uc003elh.1@uc003elg.1.A.2_57501@uc003elh.1@uc003elg.1.A.1_57501@uc003elh.1@uc003elg.1.A.0', '57501@uc003elh.1@uc003elg.1.B.0')	(0,0):77,(1,0):2	1904-01-01 00:02:00	(0,0):228,(0,1):4,(1,0):3	0:3,1:4	3
AFE	79711@uc001wmt.1@uc001wmv.1	ENSG00000254692,ENSG00000100926,ENSG00000259522,ENSG00000196497	0.15	0.05	0.31	0.43	0.22	0.66	-0.28	3.08	('360@uc003zsw.1@uc003zsv.1uc003zsx.1uc010mju.1.A.0', '360@uc003zsw.1@uc003zsv.1uc003zsx.1uc010mju.1.B.0')	(0,0):177,(0,1):10,(1,0):3	0:3,1:10	(0,0):318,(0,1):6,(1,0):9	0:9,1:6	9
AFE	1375@uc003bmn.1uc003bmo.1@uc003bmt.1	ENSG00000205560,ENSG00000100288,ENSG00000254413	0.85	0.63	0.97	0.56	0.37	0.77	0.29	3.07	('2051@uc003wbv.1@uc003wbs.1.B.0_2051@uc003wbv.1@uc003wbs.1.B.1_2051@uc003wbv.1@uc003wbs.1.B.2_2051@uc003wbv.1@uc003wbs.1.B.3_2051@uc003wbv.1@uc003wbs.1.B.4_2051@uc003wbv.1@uc003wbs.1.B.5', '2051@uc003wbv.1@uc003wbs.1.A.0')	(0,0):20,(1,0):13	1904-01-01 00:13:00	(0,0):79,(0,1):6,(1,0):14	0:14,1:6	7
AFE	9919@uc004chq.1@uc004chw.1uc010nbn.1	ENSG00000148396	0.17	0.03	0.49	0.7	0.32	0.97	-0.53	3.05	('5339@uc003zab.1@uc003zad.1.A.0', '5339@uc003zab.1@uc003zad.1.B.0')	(0,0):85,(0,1):2,(1,0):7	0:7,1:2	(0,0):111,(1,0):34	1904-01-01 00:34:00	8
AFE	119@uc010fdt.1@uc010fdu.1	ENSG00000075340	0.18	0.07	0.4	0.65	0.24	0.98	-0.47	3.02	('91584@uc003vqz.2@uc003vra.2uc003vrc.2.B.1_91584@uc003vqz.2@uc003vra.2uc003vrc.2.B.0', '91584@uc003vqz.2@uc003vra.2uc003vrc.2.A.0')	(0,0):944,(0,1):3,(1,0):34	0:34,1:3	(0,0):1541,(1,0):18	1904-01-01 00:18:00	7
AFE	57553@uc010grd.1@uc002znj.1	ENSG00000093100,ENSG00000243156	0.73	0.5	0.92	0.4	0.22	0.63	0.33	3.02	('146909@uc002iht.1@uc002ihu.1.B.1_146909@uc002iht.1@uc002ihu.1.B.0', '146909@uc002iht.1@uc002ihu.1.A.0')	(0,0):454,(0,1):1,(1,0):45	0:45,1:1	(0,0):448,(0,1):5,(1,0):39	0:39,1:5	17
AFE	57556@uc003krv.2@uc010jck.1uc003krx.2	ENSG00000092421	0.05	0.01	0.17	0.31	0.12	0.55	-0.26	3.02	('113277@uc002idn.1@uc002kha.1.B.0_113277@uc002idn.1@uc002kha.1.B.1_113277@uc002idn.1@uc002kha.1.B.2', '113277@uc002idn.1@uc002kha.1.A.0_113277@uc002idn.1@uc002kha.1.A.1_113277@uc002idn.1@uc002kha.1.A.2')	(0,0):1228698,(0,1):22	0:0,1:22	(0,0):1001414,(0,1):8,(1,0):3	0:3,1:8	17
AFE	51463@uc001epx.2@uc001epv.2	ENSG00000188092	0.09	0.01	0.41	0.48	0.11	0.86	-0.39	3.01	('57669@uc010flm.1@uc002tmh.2.B.0_57669@uc010flm.1@uc002tmh.2.B.1', '57669@uc010flm.1@uc002tmh.2.A.0')	(0,0):740,(0,1):2,(1,0):9	0:9,1:2	(0,0):436,(1,0):3	1904-01-01 00:03:00	2
AFE	6733@uc003vct.1@uc003vcv.1	ENSG00000135250	0.11	0	0.62	0.58	0.2	0.91	-0.47	3.01	('5727@uc010mrs.1@uc010mrq.1.B.2_5727@uc010mrs.1@uc010mrq.1.B.1_5727@uc010mrs.1@uc010mrq.1.B.0', '5727@uc010mrs.1@uc010mrq.1.A.0')	(0,0):58,(0,1):2	0:0,1:2	(0,0):171,(1,0):4	1904-01-01 00:04:00	9
AFE	25793@uc003amv.1@uc003amt.1	ENSG00000100225	0.18	0	0.57	0.59	0.21	0.94	-0.41	2.99	('8541@uc002pms.2@uc002pmr.1.B.0_8541@uc002pms.2@uc002pmr.1.B.1', '8541@uc002pms.2@uc002pmr.1.A.0')	(0,0):46,(0,1):2,(1,0):1	0:1,1:2	(0,0):78,(1,0):1	1904-01-01 00:01:00	19
AFE	5339@uc003zab.1@uc003zaj.1	ENSG00000207574,ENSG00000178209	0.29	0.17	0.4	0.55	0.36	0.73	-0.26	2.99	('23192@uc002wby.1@uc002wbx.1.A.0', '23192@uc002wby.1@uc002wbx.1.B.0_23192@uc002wby.1@uc002wbx.1.B.1_23192@uc002wby.1@uc002wbx.1.B.2_23192@uc002wby.1@uc002wbx.1.B.3')	(0,0):1229,(0,1):23,(1,0):17	0:17,1:23	(0,0):946,(0,1):9,(1,0):20	0:20,1:9	2
AFE	2217@uc002poi.1@uc002pog.1	ENSG00000104870	0.69	0.45	0.94	0.34	0.21	0.54	0.35	2.98	('57556@uc003krv.2@uc010jck.1uc003krx.2.A.0', '57556@uc003krv.2@uc010jck.1uc003krx.2.B.1_57556@uc003krv.2@uc010jck.1uc003krx.2.B.0')	(0,0):497,(0,1):2,(1,0):19	0:19,1:2	(0,0):1181,(0,1):11,(1,0):19	0:19,1:11	5
AFE	6655@uc010ans.1@uc001wxt.2	ENSG00000100485	0.18	0.1	0.35	0.59	0.25	0.96	-0.41	2.98	('54840@uc003zrj.1@uc003zrr.1.A.2_54840@uc003zrj.1@uc003zrr.1.A.1_54840@uc003zrj.1@uc003zrr.1.A.0', '54840@uc003zrj.1@uc003zrr.1.B.1_54840@uc003zrj.1@uc003zrr.1.B.0')	(0,0):270,(0,1):4,(1,0):77,(1,1):8	0:77,1:12	(0,0):269,(1,0):81,(1,1):4	0:81,1:4	9
AFE	23446@uc004bco.1@uc010mtk.1uc004bcn.1	ENSG00000070214	0.47	0.17	0.76	0.86	0.56	0.98	-0.39	2.96	('1102@uc001vci.1@uc001vcj.1.A.1_1102@uc001vci.1@uc001vcj.1.A.0', '1102@uc001vci.1@uc001vcj.1.B.0')	(0,0):116,(0,1):2,(1,0):2	0:2,1:2	(0,0):194,(1,0):5	1904-01-01 00:05:00	13
AFE	25793@uc003amp.1uc003amr.1@uc003amt.1	ENSG00000100225	0.34	0.12	0.75	0.8	0.42	0.98	-0.46	2.96	('23240@uc010ipr.1@uc010ipp.1uc003inm.2.B.0', '23240@uc010ipr.1@uc010ipp.1uc003inm.2.A.0')	(0,0):1263,(0,1):2,(1,0):12	0:12,1:2	(0,0):1846,(1,0):15	1904-01-01 00:15:00	4
AFE	215@uc004fig.1@uc004fif.1	ENSG00000101986	0.56	0.42	0.69	0.8	0.6	0.92	-0.24	2.95	('23635@uc003khn.1@uc003kho.1uc003khp.1.A.4_23635@uc003khn.1@uc003kho.1uc003khp.1.A.3_23635@uc003khn.1@uc003kho.1uc003khp.1.A.2_23635@uc003khn.1@uc003kho.1uc003khp.1.A.1_23635@uc003khn.1@uc003kho.1uc003khp.1.A.0', '23635@uc003khn.1@uc003kho.1uc003khp.1.B.0')	(0,0):9992,(0,1):13,(1,0):53,(1,1):2	0:55,1:13	(0,0):15111,(0,1):3,(1,0):55,(1,1):10	0:63,1:5	5
AFE	3590@uc010mke.1@uc003zvi.1	ENSG00000213930,ENSG00000258728,ENSG00000137070	0.81	0.54	0.98	0.4	0.09	0.73	0.41	2.94	('534@uc003ryp.1@uc003rgn.1.B.0', '534@uc003ryp.1@uc003rgn.1.A.0')	(0,0):55538,(0,1):1,(1,0):6	0:6,1:1	(0,0):29668,(0,1):3,(1,0):2	0:2,1:3	6
AFE	23120@uc010jit.1@uc003lym.1	ENSG00000118322	0.27	0.1	0.49	0.66	0.36	0.91	-0.39	2.86	('256356@uc003eup.1@uc003euq.1.B.0', '256356@uc003eup.1@uc003euq.1.A.0')	(0,0):406,(0,1):3,(1,0):12	0:12,1:3	(0,0):453,(1,0):12	1904-01-01 00:12:00	3
AFE	23345@uc003qop.2@uc003qor.2	ENSG00000131018	0.41	0.22	0.68	0.76	0.43	0.97	-0.35	2.86	('11188@uc003deh.2@uc003ded.2.B.0', '11188@uc003deh.2@uc003ded.2.A.0_11188@uc003deh.2@uc003ded.2.A.1')	(0,0):2285,(0,1):7,(1,0):6	0:6,1:7	(0,0):1373,(0,1):1,(1,0):7	0:7,1:1	3
AFE	55764@uc003ems.1@uc003emr.1	ENSG00000163913	0.24	0.15	0.33	0.57	0.28	0.85	-0.33	2.86	('6907@uc004css.1@uc010ndq.1.A.0', '6907@uc004css.1@uc010ndq.1.B.0_6907@uc004css.1@uc010ndq.1.B.1_6907@uc004css.1@uc010ndq.1.B.2_6907@uc004css.1@uc010ndq.1.B.3')	(0,0):2436,(0,1):29,(1,0):28	0:28,1:29	(0,0):1947,(0,1):3,(1,0):12	0:12,1:3	X
AFE	1894@uc003fim.1@uc003fik.1uc003fil.1	ENSG00000114346	0.13	0.06	0.24	0.5	0.19	0.86	-0.37	2.85	('8867@uc002yqe.2@uc002yqf.1uc002yqg.1.A.5_8867@uc002yqe.2@uc002yqf.1uc002yqg.1.A.4_8867@uc002yqe.2@uc002yqf.1uc002yqg.1.A.3_8867@uc002yqe.2@uc002yqf.1uc002yqg.1.A.2_8867@uc002yqe.2@uc002yqf.1uc002yqg.1.A.1_8867@uc002yqe.2@uc002yqf.1uc002yqg.1.A.0', '8867@uc002yqe.2@uc002yqf.1uc002yqg.1.B.1_8867@uc002yqe.2@uc002yqf.1uc002yqg.1.B.0')	(0,0):1133,(0,1):6,(1,0):108	0:108,1:6	(0,0):1097,(0,1):1,(1,0):110	0:110,1:1	21
AFE	4281@uc010ndv.1@uc001225.uc004cuf.1	ENSG00000101871	0.93	0.83	0.99	0.72	0.53	0.89	0.21	2.84	('9374@uc003rmh.1@uc010kqr.1.A.0_9374@uc003rmh.1@uc010kqr.1.A.1', '9374@uc003rmh.1@uc010kqr.1.B.0')	(0,0):7090,(0,1):1,(1,0):27	0:27,1:1	(0,0):5013,(0,1):5,(1,0):15	0:15,1:5	6
AFE	55680@uc001joa.1@uc009xpv.1	ENSG00000204130	0.81	0.47	0.99	0.39	0.12	0.66	0.42	2.84	('23133@uc004dsx.2@uc004dsv.2.A.0', '23133@uc004dsx.2@uc004dsv.2.B.0')	(0,0):114,(1,0):6	1904-01-01 00:06:00	(0,0):78,(0,1):3,(1,0):4	0:4,1:3	X
AFE	25959@uc002mqp.1@uc002mqo.2	ENSG00000197256	0.17	0	0.54	0.63	0.21	0.94	-0.46	2.83	('79958@uc002mfb.1@uc002mfe.1.A.6_79958@uc002mfb.1@uc002mfe.1.A.5_79958@uc002mfb.1@uc002mfe.1.A.4_79958@uc002mfb.1@uc002mfe.1.A.3_79958@uc002mfb.1@uc002mfe.1.A.2_79958@uc002mfb.1@uc002mfe.1.A.1_79958@uc002mfb.1@uc002mfe.1.A.0', '79958@uc002mfb.1@uc002mfe.1.B.0')	(0,0):36,(0,1):1,(1,0):3	0:3,1:1	(0,0):74,(1,0):2	1904-01-01 00:02:00	19
AFE	83637@uc010kyj.1@uc003tls.1	ENSG00000122515	0.02	0	0.07	0.59	0.06	0.96	-0.57	2.83	('22883@uc001aqf.1@uc001aqh.1uc001aqi.1.B.0', '22883@uc001aqf.1@uc001aqh.1uc001aqi.1.A.0')	(0,0):948,(0,1):5,(1,0):5	0:5,1:5	(0,0):834,(1,0):3	1904-01-01 00:03:00	1
AFE	115677@uc002uej.1@uc002uef.1	ENSG00000163072	0.2	0.04	0.45	0.65	0.25	0.98	-0.45	2.82	('10287@uc002yhz.1@uc002yib.1.A.1_10287@uc002yhz.1@uc002yib.1.A.0', '10287@uc002yhz.1@uc002yib.1.B.1_10287@uc002yhz.1@uc002yib.1.B.0')	(0,0):178,(0,1):4,(1,0):3	0:3,1:4	(0,0):100,(1,0):3	1904-01-01 00:03:00	20
AFE	10411@uc001rpw.1@uc009zkp.1	ENSG00000079337	0.05	0.01	0.1	0.26	0.1	0.5	-0.21	2.81	('55778@uc001ylt.2@uc001yls.2.A.0', '55778@uc001ylt.2@uc001yls.2.B.0_55778@uc001ylt.2@uc001yls.2.B.1')	(0,0):57,(0,1):12,(1,0):5	0:5,1:12	(0,0):43,(0,1):4,(1,0):12	0:12,1:4	14
AFE	50624@uc009yad.1@uc001lgs.1	ENSG00000138161,ENSG00000213185	0.69	0.24	0.97	0.21	0	0.66	0.48	2.81	('23345@uc003qop.2@uc003qor.2.A.1_23345@uc003qop.2@uc003qor.2.A.0', '23345@uc003qop.2@uc003qor.2.B.0')	(0,0):262,(1,0):4	1904-01-01 00:04:00	(0,0):265,(0,1):1	0:0,1:1	6
AFE	4855@uc003sez.1uc003sfa.2@uc003rnh.1	ENSG00000204301,ENSG00000204296,ENSG00000204290	0.28	0.11	0.59	0.75	0.27	0.99	-0.47	2.8	('57579@uc003pfn.2@uc003pfh.2.B.0_57579@uc003pfn.2@uc003pfh.2.B.1_57579@uc003pfn.2@uc003pfh.2.B.2', '57579@uc003pfn.2@uc003pfh.2.A.0')	(0,0):3428,(0,1):3,(1,0):39	0:39,1:3	(0,0):1521,(1,0):13	1904-01-01 00:13:00	6
AFE	53916@uc002opf.1@uc002opd.1	ENSG00000167578	0.74	0.53	0.93	0.45	0.27	0.67	0.29	2.8	('130617@uc002vkb.1@uc002vjy.1uc002vjz.1uc002vka.1.A.0_130617@uc002vkb.1@uc002vjy.1uc002vjz.1uc002vka.1.A.1_130617@uc002vkb.1@uc002vjy.1uc002vjz.1uc002vka.1.A.2', '130617@uc002vkb.1@uc002vjy.1uc002vjz.1uc002vka.1.B.0')	(0,0):194,(0,1):2,(1,0):58	0:58,1:2	(0,0):98,(0,1):6,(1,0):40	0:40,1:6	2
AFE	54014@uc010god.1@uc010goi.1	ENSG00000229623,ENSG00000185658	0.81	0.54	0.97	0.49	0.16	0.79	0.32	2.79	('80021@uc001zqt.1@uc001zqr.1.B.0', '80021@uc001zqt.1@uc001zqr.1.A.0')	(0,0):276,(0,1):1,(1,0):8	0:8,1:1	(0,0):275,(0,1):2,(1,0):3	0:3,1:2	15
AFE	6880@uc003mol.1@uc003mom.1	ENSG00000085231	0.41	0.17	0.69	0.79	0.45	0.98	-0.38	2.79	('26086@uc004che.1@uc004chc.2.A.0', '26086@uc004che.1@uc004chc.2.B.0')	(0,0):564,(0,1):5,(1,0):4	0:4,1:5	(0,0):393,(1,0):5	1904-01-01 00:05:00	9
AFE	4957@uc004bvh.1@uc004bve.1	ENSG00000264891,ENSG00000136811	0.24	0.02	0.91	0.65	0.34	0.91	-0.41	2.78	('7148@uc003rls.2@uc003nzl.2.B.1_7148@uc003rls.2@uc003nzl.2.B.0', '7148@uc003rls.2@uc003nzl.2.A.1_7148@uc003rls.2@uc003nzl.2.A.0')	(0,0):772555,(0,1):1	0:0,1:1	(0,0):559478,(0,1):2,(1,0):4	0:4,1:2	6
AFE	83637@uc003tlt.1@uc003tlq.1	ENSG00000122515	0.21	0.16	0.28	0.41	0.26	0.58	-0.2	2.75	('57708@uc001ddh.1@uc001ddi.1uc001ddj.1.A.0_57708@uc001ddh.1@uc001ddi.1uc001ddj.1.A.1_57708@uc001ddh.1@uc001ddi.1uc001ddj.1.A.2', '57708@uc001ddh.1@uc001ddi.1uc001ddj.1.B.0')	(0,0):4879,(0,1):37,(1,0):98	0:98,1:37	(0,0):3150,(0,1):9,(1,0):58	0:58,1:9	1
AFE	5727@uc010mrs.1@uc004avk.2	ENSG00000185920	0.72	0.33	0.99	0.29	0.09	0.59	0.43	2.74	('27034@uc009zde.1@uc009zdc.1.B.0_27034@uc009zde.1@uc009zdc.1.B.1', '27034@uc009zde.1@uc009zdc.1.A.0')	(0,0):264,(1,0):42	1904-01-01 00:42:00	(0,0):172,(0,1):2,(1,0):20	0:20,1:2	11
AFE	145508@uc001xuy.1@uc001xuz.2uc010ata.1	ENSG00000100629	0.67	0.12	0.99	0.19	0	0.53	0.48	2.73	('154664@uc010kyu.1@uc010kyr.1.B.0_154664@uc010kyu.1@uc010kyr.1.B.1_154664@uc010kyu.1@uc010kyr.1.B.2_154664@uc010kyu.1@uc010kyr.1.B.3_154664@uc010kyu.1@uc010kyr.1.B.4_154664@uc010kyu.1@uc010kyr.1.B.5_154664@uc010kyu.1@uc010kyr.1.B.6_154664@uc010kyu.1@uc010kyr.1.B.7_154664@uc010kyu.1@uc010kyr.1.B.8_154664@uc010kyu.1@uc010kyr.1.B.9_154664@uc010kyu.1@uc010kyr.1.B.10', '154664@uc010kyu.1@uc010kyr.1.A…	(0,0):226,(1,0):1	1904-01-01 00:01:00	(0,0):728,(0,1):1	0:0,1:1	7
AFE	5727@uc010mrs.1@uc004avm.2	ENSG00000185920	0.36	0.21	0.57	0.73	0.4	0.95	-0.37	2.73	('4798@uc009zcr.1@uc001qfh.1.A.2_4798@uc009zcr.1@uc001qfh.1.A.1_4798@uc009zcr.1@uc001qfh.1.A.0', '4798@uc009zcr.1@uc001qfh.1.B.2_4798@uc009zcr.1@uc001qfh.1.B.1_4798@uc009zcr.1@uc001qfh.1.B.0')	(0,0):1181,(0,1):8,(1,0):24	0:24,1:8	(0,0):1166,(0,1):1,(1,0):24	0:24,1:1	11
AFE	4054@uc001oeg.1@uc001oeh.1	ENSG00000168056	0.08	0	0.21	0.38	0.15	0.66	-0.3	2.72	('2550@uc003qzb.2uc003qzf.2@uc003nmp.2uc003nms.2.A.0', '2550@uc003qzb.2uc003qzf.2@uc003nmp.2uc003nms.2.B.0')	(0,0):628441,(0,1):21,(1,0):1	0:1,1:21	(0,0):452578,(0,1):6,(1,0):3	0:3,1:6	6
AFE	11064@uc010mvo.1@uc004bkw.2	ENSG00000224890,ENSG00000119397	0.07	0.03	0.14	0.42	0.11	0.81	-0.35	2.71	('10379@uc010alj.1@uc010ali.1uc001wmq.1.B.0_10379@uc010alj.1@uc010ali.1uc001wmq.1.B.1', '10379@uc010alj.1@uc010ali.1uc001wmq.1.A.0')	(0,0):111,(0,1):8,(1,0):40	0:40,1:8	(0,0):59,(0,1):1,(1,0):25	0:25,1:1	14
AFE	729540@uc002tfe.1@uc010fjp.1	ENSG00000015568	0.32	0.03	0.92	0.79	0.49	0.96	-0.47	2.71	('5727@uc010mrp.1@uc010mrr.1uc004avo.2.A.2_5727@uc010mrp.1@uc010mrr.1uc004avo.2.A.1_5727@uc010mrp.1@uc010mrr.1uc004avo.2.A.0', '5727@uc010mrp.1@uc010mrr.1uc004avo.2.B.0')	(0,0):74,(0,1):2	0:0,1:2	(0,0):196,(0,1):1,(1,0):6	0:6,1:1	9
AFE	79155@uc003gff.1@uc003gfg.1uc003gfh.1	ENSG00000168884	0.16	0	0.59	0.63	0.2	0.95	-0.47	2.71	('5727@uc010mrs.1@uc010mrp.1.B.2_5727@uc010mrs.1@uc010mrp.1.B.1_5727@uc010mrs.1@uc010mrp.1.B.0', '5727@uc010mrs.1@uc010mrp.1.A.0')	(0,0):53,(0,1):2	0:0,1:2	(0,0):159,(1,0):6	1904-01-01 00:06:00	9
AFE	9659@uc001ema.2@uc001elo.2uc001emh.2uc001emk.2	ENSG00000178104	0.68	0.5	0.86	0.38	0.2	0.63	0.3	2.71	('64333@uc001soa.1@uc001soc.1.A.3_64333@uc001soa.1@uc001soc.1.A.2_64333@uc001soa.1@uc001soc.1.A.1_64333@uc001soa.1@uc001soc.1.A.0', '64333@uc001soa.1@uc001soc.1.B.1_64333@uc001soa.1@uc001soc.1.B.0')	(0,0):74,(0,1):4,(1,0):37	0:37,1:4	(0,0):44,(0,1):6,(1,0):12	0:12,1:6	12
AFE	55615@uc003bew.1@uc010gzt.1	ENSG00000241484,ENSG00000248405,ENSG00000186654	0.85	0.51	0.99	0.53	0.25	0.83	0.32	2.7	('4281@uc010ndv.1@uc001231.uc004cuf.1.B.0', '4281@uc010ndv.1@uc001230.uc004cuf.1.A.2_4281@uc010ndv.1@uc001229.uc004cuf.1.A.1_4281@uc010ndv.1@uc001228.uc004cuf.1.A.0')	(0,0):89,(1,0):20	1904-01-01 00:20:00	(0,0):207,(0,1):1,(1,0):11	0:11,1:1	X
AFE	6810@uc002eal.1@uc002eak.1	ENSG00000103496	0.84	0.57	0.99	0.47	0.21	0.71	0.37	2.7	('8777@uc003zkz.2@uc003zlb.2.A.2_8777@uc003zkz.2@uc003zlb.2.A.1_8777@uc003zkz.2@uc003zlb.2.A.0', '8777@uc003zkz.2@uc003zlb.2.B.1_8777@uc003zkz.2@uc003zlb.2.B.0')	(0,0):1424,(1,0):17	1904-01-01 00:17:00	(0,0):1900,(0,1):3,(1,0):18	0:18,1:3	9
AFE	57412@uc009xxh.1uc001kwk.1@uc001kwj.1	ENSG00000201080,ENSG00000166275,ENSG00000214435	0.68	0.02	1	0.45	0.09	0.87	0.23	2.69	('10062@uc001nep.1@uc001neo.1.A.0', '10062@uc001nep.1@uc001neo.1.B.0')	(0,0):104,(1,0):18	1904-01-01 00:18:00	(0,0):98,(1,0):10	1904-01-01 00:10:00	11
AFE	6655@uc001wxt.2@uc001wxs.2	ENSG00000100485	0.5	0.25	0.78	0.83	0.59	0.99	-0.33	2.68	('8563@uc003afq.1@uc003afs.1.B.1_8563@uc003afq.1@uc003afs.1.B.0', '8563@uc003afq.1@uc003afs.1.A.2_8563@uc003afq.1@uc003afs.1.A.1_8563@uc003afq.1@uc003afs.1.A.0')	(0,0):1551,(0,1):3,(1,0):10	0:10,1:3	(0,0):1237,(0,1):1,(1,0):24	0:24,1:1	22
AFE	3801@uc002emo.2@uc002emp.1uc002emq.1	ENSG00000140859	0.15	0.01	0.59	0.63	0.17	0.99	-0.48	2.67	('80863@uc003rlz.1@uc003nzu.1.A.0', '80863@uc003rlz.1@uc003nzu.1.B.2_80863@uc003rlz.1@uc003nzu.1.B.1_80863@uc003rlz.1@uc003nzu.1.B.0')	(0,0):774225,(0,1):1	0:0,1:1	(0,0):560420,(1,0):7	1904-01-01 00:07:00	6
AFE	64221@uc001qbe.1@uc001qbc.1	ENSG00000154134	0.89	0.68	0.99	0.56	0.35	0.79	0.33	2.67	('31@uc002hnl.1@uc002hnn.1.B.6_31@uc002hnl.1@uc002hnn.1.B.5_31@uc002hnl.1@uc002hnn.1.B.4_31@uc002hnl.1@uc002hnn.1.B.3_31@uc002hnl.1@uc002hnn.1.B.2_31@uc002hnl.1@uc002hnn.1.B.1_31@uc002hnl.1@uc002hnn.1.B.0', '31@uc002hnl.1@uc002hnn.1.A.0')	(0,0):502,(1,0):63	0.04375	(0,0):660,(0,1):4,(1,0):41	0:41,1:4	17
AFE	10509@uc002bpa.1@uc002boz.1	ENSG00000225193,ENSG00000185033	0.66	0.22	0.94	0.21	0.04	0.48	0.45	2.66	('23224@uc001xgt.1@uc001xgq.1.A.0', '23224@uc001xgt.1@uc001xgq.1.B.0')	(0,0):687,(1,0):26	1904-01-01 00:26:00	(0,0):564,(0,1):2,(1,0):12	0:12,1:2	14
AFE	54813@uc001wvt.2@uc001wvq.1	ENSG00000179454	0.72	0.61	0.83	0.44	0.26	0.66	0.28	2.66	('9990@uc001zhu.1@uc001zid.1.A.3_9990@uc001zhu.1@uc001zid.1.A.2_9990@uc001zhu.1@uc001zid.1.A.1_9990@uc001zhu.1@uc001zid.1.A.0', '9990@uc001zhu.1@uc001zid.1.B.1_9990@uc001zhu.1@uc001zid.1.B.0')	(0,0):1463,(0,1):13,(1,0):62	0:62,1:13	(0,0):599,(0,1):9,(1,0):12	0:12,1:9	15
AFE	752@uc002iiq.1@uc002iin.1	ENSG00000184922	0.7	0.17	0.98	0.38	0.02	0.83	0.32	2.66	('6130@uc004cdf.1@uc004cde.1.A.0_6130@uc004cdf.1@uc004cde.1.A.1_6130@uc004cdf.1@uc004cde.1.A.2_6130@uc004cdf.1@uc004cde.1.A.3', '6130@uc004cdf.1@uc004cde.1.B.0')	(0,0):15317,(1,0):10407	0:10407	(0,0):11040,(1,0):7142	4.95972	9
AFE	8481@uc010neo.1@uc004cvq.2	ENSG00000046651	0.14	0.05	0.3	0.54	0.17	0.91	-0.4	2.66	('1889@uc001bej.2@uc001bem.2.A.0', '1889@uc001bej.2@uc001bem.2.B.0')	(0,0):518,(0,1):4,(1,0):13	0:13,1:4	(0,0):534,(1,0):6	1904-01-01 00:06:00	1
AFE	10772@uc009vqw.1uc009vqz.1@uc009vqx.1uc009vra.1	ENSG00000188529	0.58	0.09	0.96	0.07	0.01	0.28	0.51	2.65	('6655@uc001wxt.2@uc001wxs.2.B.0', '6655@uc001wxt.2@uc001wxs.2.A.0')	(0,0):527,(1,0):4	1904-01-01 00:04:00	(0,0):412,(0,1):3,(1,0):1	0:1,1:3	14
AFE	23192@uc002wby.1@uc002wbx.1	ENSG00000168397	0.52	0.13	0.87	0.13	0.02	0.38	0.39	2.65	('80325@uc010hsm.1@uc003eju.1.B.0_80325@uc010hsm.1@uc003eju.1.B.1_80325@uc010hsm.1@uc003eju.1.B.2_80325@uc010hsm.1@uc003eju.1.B.3', '80325@uc010hsm.1@uc003eju.1.A.0_80325@uc010hsm.1@uc003eju.1.A.1')	(0,0):65,(0,1):1,(1,0):13	0:13,1:1	(0,0):39,(0,1):3,(1,0):2	0:2,1:3	3
AFE	54468@uc010ktq.1@uc003srg.1	ENSG00000164654	0.36	0.22	0.55	0.74	0.38	0.97	-0.38	2.65	('4240@uc002bnf.2@uc002bng.2uc002bnh.2uc010bno.1.A.2_4240@uc002bnf.2@uc002bng.2uc002bnh.2uc010bno.1.A.1_4240@uc002bnf.2@uc002bng.2uc002bnh.2uc010bno.1.A.0', '4240@uc002bnf.2@uc002bng.2uc002bnh.2uc010bno.1.B.0')	(0,0):114,(0,1):8,(1,0):53	0:53,1:8	(0,0):102,(1,0):20	1904-01-01 00:20:00	15
AFE	113277@uc002idn.1@uc010dja.1	ENSG00000231784,ENSG00000262133,ENSG00000262003,ENSG00000263017,ENSG00000265403,ENSG00000235361,ENSG00000205899,ENSG00000262777,ENSG00000236618,ENSG00000228133,ENSG00000214014,ENSG00000108963,ENSG00000262664,ENSG00000177374,ENSG00000265777,ENSG00000236838,ENSG00000225084,ENSG00000262333,ENSG00000262456,ENSG00000239024,ENSG00000239884,ENSG00000262050,ENSG00000265566,ENSG00000142163,ENSG00000172150…	0.75	0.38	0.98	0.36	0.14	0.64	0.39	2.64	('54813@uc001wvt.2@uc001wvq.1.A.0', '54813@uc001wvt.2@uc001wvq.1.B.0')	(0,0):225,(1,0):128	0.0888889	(0,0):161,(0,1):3,(1,0):91	0:91,1:3	14
AFE	50804@uc001zwg.2@uc001zwl.2	ENSG00000104177	0.07	0.01	0.21	0.35	0.14	0.63	-0.28	2.64	('3135@uc003rai.2@uc003rsn.2.A.0_3135@uc003rai.2@uc003rsn.2.A.1_3135@uc003rai.2@uc003rsn.2.A.2', '3135@uc003rai.2@uc003rsn.2.B.0_3135@uc003rai.2@uc003rsn.2.B.1_3135@uc003rai.2@uc003rsn.2.B.2')	(0,0):2597,(0,1):20	0:0,1:20	(0,0):2594,(0,1):7,(1,0):3	0:3,1:7	6
AFE	7050@uc002kmc.1@uc002klv.1	ENSG00000177426	0.14	0.01	0.46	0.63	0.17	0.98	-0.49	2.64	('5727@uc010mrs.1@uc004avl.2.B.2_5727@uc010mrs.1@uc004avl.2.B.1_5727@uc010mrs.1@uc004avl.2.B.0', '5727@uc010mrs.1@uc004avl.2.A.0')	(0,0):58,(0,1):2	0:0,1:2	(0,0):171,(1,0):4	1904-01-01 00:04:00	9
AFE	26020@uc001whe.2@uc001whd.1	ENSG00000197324	0.69	0.3	0.96	0.21	0.01	0.8	0.48	2.63	('92799@uc002oof.1@uc002oob.1uc002ooc.1uc002ood.1.A.0_92799@uc002oof.1@uc002oob.1uc002ooc.1uc002ood.1.A.1_92799@uc002oof.1@uc002oob.1uc002ooc.1uc002ood.1.A.2_92799@uc002oof.1@uc002oob.1uc002ooc.1uc002ood.1.A.3', '92799@uc002oof.1@uc002oob.1uc002ooc.1uc002ood.1.B.0')	(0,0):488,(1,0):115	0.0798611	(0,0):258,(0,1):1,(1,0):75	0:75,1:1	19
AFE	667@uc003pcw.2@uc003pdf.1	ENSG00000151914	0.51	0.42	0.6	0.75	0.53	0.9	-0.24	2.63	('11064@uc010mvo.1@uc004bkw.2.A.0_11064@uc010mvo.1@uc004bkw.2.A.1_11064@uc010mvo.1@uc004bkw.2.A.2_11064@uc010mvo.1@uc004bkw.2.A.3_11064@uc010mvo.1@uc004bkw.2.A.4_11064@uc010mvo.1@uc004bkw.2.A.5_11064@uc010mvo.1@uc004bkw.2.A.6', '11064@uc010mvo.1@uc004bkw.2.B.0_11064@uc010mvo.1@uc004bkw.2.B.1_11064@uc010mvo.1@uc004bkw.2.B.2')	(0,0):2648,(0,1):33,(1,0):144	0:144,1:33	(0,0):975,(0,1):3,(1,0):41	0:41,1:3	9
AFE	23224@uc001xgn.1@uc010apx.1	ENSG00000054654	0.68	0.16	0.97	0.18	0	0.64	0.5	2.61	('5337@uc003fhu.2@uc003fhr.1.B.0', '5337@uc003fhu.2@uc003fhr.1.A.0')	(0,0):766,(1,0):7	1904-01-01 00:07:00	(0,0):368,(0,1):1	0:0,1:1	3
AFE	57554@uc001dep.1@uc001deo.1	ENSG00000033122	0.71	0.48	0.88	0.42	0.25	0.61	0.29	2.58	('2145@uc010cyo.1@uc002iaz.1uc002iba.1uc010cyq.1uc010cys.1.A.1_2145@uc010cyo.1@uc002iaz.1uc002iba.1uc010cyq.1uc010cys.1.A.0', '2145@uc010cyo.1@uc002iaz.1uc002iba.1uc010cyq.1uc010cys.1.B.2_2145@uc010cyo.1@uc002iaz.1uc002iba.1uc010cyq.1uc010cys.1.B.1_2145@uc010cyo.1@uc002iaz.1uc002iba.1uc010cyq.1uc010cys.1.B.0')	(0,0):142,(0,1):2,(1,0):10	0:10,1:2	(0,0):186,(0,1):9,(1,0):12	0:12,1:9	17
AFE	57579@uc003pfn.2@uc003pfh.2	ENSG00000238386,ENSG00000082269	0.34	0.23	0.48	0.14	0.03	0.28	0.2	2.58	('224@uc002gwd.1@uc002gwa.1uc002gwb.1.A.0', '224@uc002gwd.1@uc002gwa.1uc002gwb.1.B.0')	(0,0):202,(0,1):32,(1,0):23	0:23,1:32	(0,0):118,(0,1):17,(1,0):3	0:3,1:17	17
AFE	79958@uc002mfb.1@uc002mfe.1	ENSG00000205744	0.38	0.25	0.53	0.18	0.1	0.27	0.2	2.57	('3098@uc001jpl.2@uc001jpk.2.A.0', '3098@uc001jpl.2@uc001jpk.2.B.0')	(0,0):197,(0,1):27,(1,0):17	0:17,1:27	(0,0):262,(0,1):51,(1,0):12	0:12,1:51	10
AFE	10801@uc010dhd.1@uc002jtv.1	ENSG00000200651,ENSG00000184640	0.69	0.13	0.98	0.19	0.05	0.46	0.5	2.55	('23224@uc001xgn.1@uc010apx.1.A.0_23224@uc001xgn.1@uc010apx.1.A.1', '23224@uc001xgn.1@uc010apx.1.B.0')	(0,0):201,(1,0):4	1904-01-01 00:04:00	(0,0):416,(0,1):3,(1,0):3	0:3,1:3	14
AFE	2145@uc010cyo.1@uc002iaz.1uc002iba.1uc010cyq.1uc010cys.1	ENSG00000108799	0.72	0.36	0.99	0.34	0.16	0.6	0.38	2.55	('6880@uc003moo.1@uc003mol.1.A.2_6880@uc003moo.1@uc003mol.1.A.1_6880@uc003moo.1@uc003mol.1.A.0', '6880@uc003moo.1@uc003mol.1.B.0')	(0,0):1539,(1,0):3896	2.70556	(0,0):1176,(0,1):3,(1,0):3538	0:3538,1:3	5
AFE	5727@uc010mrp.1@uc010mrr.1uc004avo.2	ENSG00000185920	0.53	0.37	0.7	0.27	0.13	0.46	0.26	2.55	('144132@uc001mdu.2@uc001mdq.1.A.0', '144132@uc001mdu.2@uc001mdq.1.B.0')	(0,0):760,(0,1):8,(1,0):22	0:22,1:8	(0,0):724,(0,1):12,(1,0):10	0:10,1:12	11
AFE	80237@uc001zsw.1@uc001zsx.1	ENSG00000128886,ENSG00000221792,ENSG00000184716,ENSG00000262560	0.82	0.44	0.97	0.47	0.2	0.82	0.35	2.55	('317662@uc009xrb.1@uc009xqz.1.A.0', '317662@uc009xrb.1@uc009xqz.1.B.0')	(0,0):403,(1,0):58	1904-01-01 00:58:00	(0,0):335,(0,1):1,(1,0):27	0:27,1:1	10
AFE	26086@uc004che.1@uc004chc.2	ENSG00000160360	0.53	0.39	0.68	0.76	0.61	0.88	-0.23	2.54	('80700@uc002mam.1@uc002man.1.A.1_80700@uc002mam.1@uc002man.1.A.0', '80700@uc002mam.1@uc002man.1.B.0')	(0,0):194,(0,1):13,(1,0):48	0:48,1:13	(0,0):243,(0,1):6,(1,0):64	0:64,1:6	19
AFE	4629@uc002dea.1@uc010bvg.1	ENSG00000133392	0.3	0.13	0.58	0.74	0.19	1	-0.44	2.54	('57579@uc003pfo.1@uc003pfn.2.A.0', '57579@uc003pfo.1@uc003pfn.2.B.0')	(0,0):204,(0,1):3,(1,0):444	0:444,1:3	(0,0):45,(1,0):144	0.1	6
AFE	57501@uc003elh.1@uc003elg.1	ENSG00000187695,ENSG00000114656	0.97	0.88	1	0.75	0.54	0.91	0.22	2.54	('31@uc002hnl.1@uc002hno.1.B.0', '31@uc002hnl.1@uc002hno.1.A.0')	(0,0):533,(1,0):32	1904-01-01 00:32:00	(0,0):682,(0,1):4,(1,0):19	0:19,1:4	17
AFE	64764@uc003vtv.1@uc003vtw.1uc003vtx.1uc003vty.2	ENSG00000182158	0.39	0.23	0.64	0.77	0.39	0.98	-0.38	2.54	('1375@uc003bmn.1uc003bmo.1@uc003bmq.1.B.0', '1375@uc003bmn.1uc003bmo.1@uc003bmq.1.A.1_1375@uc003bmn.1uc003bmo.1@uc003bmq.1.A.0')	(0,0):277,(0,1):6,(1,0):100	0:100,1:6	(0,0):164,(1,0):54	1904-01-01 00:54:00	22
AFE	83259@uc004fqp.1@uc004fql.1	ENSG00000252468,ENSG00000099715	0.19	0.08	0.41	0.55	0.25	0.88	-0.36	2.54	('6464@uc001ffu.1@uc001ffx.1uc001ffy.1.B.1_6464@uc001ffu.1@uc001ffx.1uc001ffy.1.B.0', '6464@uc001ffu.1@uc001ffx.1uc001ffy.1.A.0')	(0,0):2244,(0,1):5,(1,0):48	0:48,1:5	(0,0):2230,(0,1):1,(1,0):61	0:61,1:1	1
AFE	9659@uc001elv.2@uc001emf.1	ENSG00000178104	0.55	0.41	0.7	0.31	0.17	0.47	0.24	2.54	('64333@uc001soa.1@uc001sob.1.A.3_64333@uc001soa.1@uc001sob.1.A.2_64333@uc001soa.1@uc001sob.1.A.1_64333@uc001soa.1@uc001sob.1.A.0', '64333@uc001soa.1@uc001sob.1.B.0')	(0,0):65,(0,1):13,(1,0):37	0:37,1:13	(0,0):38,(0,1):12,(1,0):12	0:12,1:12	12
AFE	3305@uc003sbq.1@uc010kna.1	ENSG00000230622,ENSG00000204463,ENSG00000204439,ENSG00000204438,ENSG00000204428,ENSG00000266776,ENSG00000255552,ENSG00000213722,ENSG00000252743,ENSG00000235663,ENSG00000201555,ENSG00000204390,ENSG00000204421,ENSG00000204427,ENSG00000213719,ENSG00000204422,ENSG00000204394,ENSG00000204396,ENSG00000204392	0.78	0.34	1	0.37	0.06	0.81	0.41	2.53	('80864@uc003rmj.1@uc003sdz.1.B.0_80864@uc003rmj.1@uc003sdz.1.B.1', '80864@uc003rmj.1@uc003sdz.1.A.0_80864@uc003rmj.1@uc003sdz.1.A.1')	(0,0):7645,(1,0):3	1904-01-01 00:03:00	(0,0):5535,(0,1):1	0:0,1:1	6
AFE	1801@uc002ftw.2@uc002ftu.1	ENSG00000108963	0.21	0.05	0.47	0.63	0.21	0.96	-0.42	2.52	('80781@uc002zhk.1@uc002zhi.1.B.0', '80781@uc002zhk.1@uc002zhi.1.A.0_80781@uc002zhk.1@uc002zhi.1.A.1_80781@uc002zhk.1@uc002zhi.1.A.2')	(0,0):199,(0,1):5,(1,0):1	0:1,1:5	(0,0):321,(1,0):2	1904-01-01 00:02:00	21
AFE	23499@uc009vvr.1uc009vvs.1@uc009vvq.1	ENSG00000127603	0.55	0.29	0.79	0.23	0.11	0.43	0.32	2.52	('4008@uc001vjv.1@uc001vjt.1.A.0_4008@uc001vjv.1@uc001vjt.1.A.1_4008@uc001vjv.1@uc001vjt.1.A.2_4008@uc001vjv.1@uc001vjt.1.A.3_4008@uc001vjv.1@uc001vjt.1.A.4', '4008@uc001vjv.1@uc001vjt.1.B.0')	(0,0):569,(0,1):3,(1,0):18	0:18,1:3	(0,0):802,(0,1):7,(1,0):11	0:11,1:7	13
AFE	254887@uc003eaw.1@uc003eav.1	ENSG00000184307	0.61	0.22	0.92	0.21	0.04	0.48	0.4	2.52	('152503@uc003imb.2@uc003ime.2.B.6_152503@uc003imb.2@uc003ime.2.B.5_152503@uc003imb.2@uc003ime.2.B.4_152503@uc003imb.2@uc003ime.2.B.3_152503@uc003imb.2@uc003ime.2.B.2_152503@uc003imb.2@uc003ime.2.B.1_152503@uc003imb.2@uc003ime.2.B.0', '152503@uc003imb.2@uc003ime.2.A.0')	(0,0):67,(1,0):3	1904-01-01 00:03:00	(0,0):241,(0,1):6,(1,0):4	0:4,1:6	4
AFE	286@uc003xoc.1uc0031698.uc003xol.1	ENSG00000029534	0.2	0.02	0.55	0.56	0.26	0.86	-0.36	2.52	('4629@uc002dea.1@uc010bvg.1.A.2_4629@uc002dea.1@uc010bvg.1.A.1_4629@uc002dea.1@uc010bvg.1.A.0', '4629@uc002dea.1@uc010bvg.1.B.3_4629@uc002dea.1@uc010bvg.1.B.2_4629@uc002dea.1@uc010bvg.1.B.1_4629@uc002dea.1@uc010bvg.1.B.0')	(0,0):119,(0,1):2	0:0,1:2	(0,0):492,(0,1):1,(1,0):4	0:4,1:1	16
AFE	652919@uc002tga.1@uc002tgb.1	ENSG00000183054	0.8	0.58	0.95	0.47	0.22	0.77	0.33	2.52	('25793@uc003ams.1@uc003amt.1.A.0_25793@uc003ams.1@uc003amt.1.A.1', '25793@uc003ams.1@uc003amt.1.B.0')	(0,0):986,(1,0):191	0.132639	(0,0):541,(0,1):2,(1,0):111	0:111,1:2	22
AFE	163486@uc001gug.2@uc001guf.2	ENSG00000207139,ENSG00000233040,ENSG00000213047	0.62	0.29	0.95	0.23	0.09	0.47	0.39	2.51	('79706@uc003uzf.2@uc003uzh.2.A.0_79706@uc003uzf.2@uc003uzh.2.A.1_79706@uc003uzf.2@uc003uzh.2.A.2_79706@uc003uzf.2@uc003uzh.2.A.3_79706@uc003uzf.2@uc003uzh.2.A.4', '79706@uc003uzf.2@uc003uzh.2.B.0')	(0,0):588,(0,1):1,(1,0):98	0:98,1:1	(0,0):454,(0,1):4,(1,0):65	0:65,1:4	7
AFE	26095@uc009xmw.1@uc001jdt.1	ENSG00000204179	0.06	0	0.26	0.62	0.06	0.99	-0.56	2.51	('8541@uc002pmt.1@uc002pmr.1.B.0_8541@uc002pmt.1@uc002pmr.1.B.1', '8541@uc002pmt.1@uc002pmr.1.A.0')	(0,0):279,(0,1):4,(1,0):1	0:1,1:4	(0,0):228,(1,0):1	1904-01-01 00:01:00	19
AFE	10208@uc001ute.1@uc001utc.2	ENSG00000132952	0.12	0.03	0.37	0.63	0.13	0.98	-0.51	2.49	('145508@uc001xuy.1@uc001xuz.2uc010ata.1.B.2_145508@uc001xuy.1@uc001xuz.2uc010ata.1.B.1_145508@uc001xuy.1@uc001xuz.2uc010ata.1.B.0', '145508@uc001xuy.1@uc001xuz.2uc010ata.1.A.0')	(0,0):447,(0,1):3,(1,0):38	0:38,1:3	(0,0):359,(1,0):12	1904-01-01 00:12:00	14
AFE	143570@uc001ovs.1@uc009yub.1uc001ovq.2	ENSG00000265344,ENSG00000166435	0.69	0.29	0.95	0.21	0.04	0.59	0.48	2.49	('83637@uc003tlt.1@uc003tlq.1.A.0', '83637@uc003tlt.1@uc003tlq.1.B.0_83637@uc003tlt.1@uc003tlq.1.B.1')	(0,0):277,(1,0):40	1904-01-01 00:40:00	(0,0):239,(0,1):2,(1,0):25	0:25,1:2	7
AFE	10411@uc001rpw.1@uc009zkq.1	ENSG00000079337	0.66	0.22	0.95	0.19	0.04	0.45	0.47	2.48	('23224@uc010apx.1@uc010apw.1.B.0', '23224@uc010apx.1@uc010apw.1.A.0')	(0,0):44,(1,0):4	1904-01-01 00:04:00	(0,0):88,(0,1):3,(1,0):5	0:5,1:3	14
AFE	6880@uc003jwc.1@uc003jwa.1	ENSG00000085231	0.48	0.13	0.91	0.09	0.01	0.32	0.39	2.48	('79987@uc004bev.1@uc010mtz.1uc010mua.1uc004beu.2.B.0', '79987@uc004bev.1@uc010mtz.1uc010mua.1uc004beu.2.A.1_79987@uc004bev.1@uc010mtz.1uc010mua.1uc004beu.2.A.0')	(0,0):31,(0,1):1,(1,0):3	0:3,1:1	(0,0):86,(0,1):4	0:0,1:4	9
AFE	80863@uc003rlz.1@uc003nzu.1	ENSG00000218472,ENSG00000260604,ENSG00000230648,ENSG00000237716,ENSG00000231811,ENSG00000260673,ENSG00000236336,ENSG00000220685,ENSG00000265083,ENSG00000264541,ENSG00000220446,ENSG00000218574,ENSG00000217239,ENSG00000216360,ENSG00000230770,ENSG00000239472,ENSG00000124785,ENSG00000241216,ENSG00000261211,ENSG00000224532,ENSG00000219986,ENSG00000240936,ENSG00000251762,ENSG00000201483,ENSG00000220472…	0.23	0.1	0.43	0.69	0.25	0.98	-0.46	2.48	('5214@uc009xhu.1@uc009xhr.1.A.0_5214@uc009xhu.1@uc009xhr.1.A.1', '5214@uc009xhu.1@uc009xhr.1.B.0_5214@uc009xhu.1@uc009xhr.1.B.1')	(0,0):2903,(0,1):4,(1,0):99	0:99,1:4	(0,0):1953,(1,0):70	0.0486111	10
AFE	113622@uc001vtp.1@uc001vtq.1	ENSG00000153531	0.63	0.14	0.94	0.32	0.05	0.8	0.31	2.47	('26205@uc002yfo.1@uc002yfp.1.B.0', '26205@uc002yfo.1@uc002yfp.1.A.0')	(0,0):62,(1,0):5	1904-01-01 00:05:00	(0,0):101,(0,1):1,(1,0):7	0:7,1:1	20
AFE	6654@uc002rrl.1@uc002rrk.2	ENSG00000225900,ENSG00000115904	0.41	0.2	0.75	0.13	0.07	0.26	0.28	2.47	('25771@uc003bif.1@uc003bib.1uc003bic.1uc003bie.1.A.0_25771@uc003bif.1@uc003bib.1uc003bic.1uc003bie.1.A.1_25771@uc003bif.1@uc003bib.1uc003bic.1uc003bie.1.A.2', '25771@uc003bif.1@uc003bib.1uc003bic.1uc003bie.1.B.0')	(0,0):210,(0,1):3,(1,0):59	0:59,1:3	(0,0):209,(0,1):9,(1,0):44	0:44,1:9	22
AFE	11270@uc003rvs.1@uc003rdr.1	ENSG00000222894,ENSG00000137404,ENSG00000204590,ENSG00000146112,ENSG00000204560,ENSG00000204569	0.37	0.16	0.66	0.1	0.03	0.29	0.27	2.46	('9578@uc001ymj.1@uc001ymi.1.B.0', '9578@uc001ymj.1@uc001ymi.1.A.0')	(0,0):1487,(0,1):2,(1,0):27	0:27,1:2	(0,0):1583,(0,1):5,(1,0):10	0:10,1:5	14
AFE	23224@uc010apx.1@uc001xgk.2uc001xgl.1uc001xgm.1	ENSG00000054654	0.81	0.48	0.98	0.39	0.08	0.79	0.42	2.46	('7375@uc003cwo.1@uc003cwq.1uc003cwr.1.B.0', '7375@uc003cwo.1@uc003cwq.1uc003cwr.1.A.0')	(0,0):839,(1,0):8	1904-01-01 00:08:00	(0,0):651,(0,1):2,(1,0):2	0:2,1:2	3
AFE	64708@uc002vsk.1@uc010fxy.1	ENSG00000144524	0.68	0.26	0.95	0.26	0.09	0.6	0.42	2.46	('25793@uc003amv.1@uc003amt.1.A.0', '25793@uc003amv.1@uc003amt.1.B.0')	(0,0):2505,(1,0):320	0.222222	(0,0):1349,(0,1):2,(1,0):142	0:142,1:2	22
AFE	79987@uc004bev.1@uc010mtz.1uc010mua.1uc004beu.2	ENSG00000165124	0.85	0.54	1	0.5	0.26	0.81	0.35	2.45	('1390@uc001iyq.1uc001iyr.1@uc001iya.1.B.0_1390@uc001iyq.1uc001iyr.1@uc001iya.1.B.1', '1390@uc001iyq.1uc001iyr.1@uc001iya.1.A.0')	(0,0):932,(1,0):25	1904-01-01 00:25:00	(0,0):711,(0,1):2,(1,0):19	0:19,1:2	10
AFE	114897@uc002jwq.1@uc002jwt.1	ENSG00000173918	0.4	0.14	0.75	0.75	0.44	0.95	-0.35	2.44	('51126@uc002wrr.1@uc002wrp.1uc002wrq.1.B.0', '51126@uc002wrr.1@uc002wrp.1uc002wrq.1.A.0')	(0,0):74,(0,1):3,(1,0):3	0:3,1:3	(0,0):55,(1,0):3	1904-01-01 00:03:00	20
AFE	153129@uc010ivx.1@uc003jqf.1	ENSG00000177058	0.11	0.01	0.44	0.56	0.12	0.99	-0.45	2.44	('29062@uc010lmq.1@uc003vsp.1.A.4_29062@uc010lmq.1@uc003vsp.1.A.3_29062@uc010lmq.1@uc003vsp.1.A.2_29062@uc010lmq.1@uc003vsp.1.A.1_29062@uc010lmq.1@uc003vsp.1.A.0', '29062@uc010lmq.1@uc003vsp.1.B.0')	(0,0):108,(0,1):2,(1,0):22	0:22,1:2	(0,0):105,(1,0):20	1904-01-01 00:20:00	7
AFE	27445@uc010lec.1@uc003uhx.2uc003uhv.2	ENSG00000186472	0.32	0.08	0.71	0.02	0	0.13	0.3	2.43	('1186@uc010brq.1@uc002clu.2.B.0', '1186@uc010brq.1@uc002clu.2.A.0')	(0,0):74,(0,1):1,(1,0):14	0:14,1:1	(0,0):82,(0,1):5,(1,0):23	0:23,1:5	16
AFE	65065@uc002uzt.2uc002uzs.2@uc002uzr.1	ENSG00000144426	0.14	0.03	0.37	0.54	0.17	0.9	-0.4	2.43	('55615@uc003bew.1@uc010gzt.1.B.0_55615@uc003bew.1@uc010gzt.1.B.1', '55615@uc003bew.1@uc010gzt.1.A.0_55615@uc003bew.1@uc010gzt.1.A.1')	(0,0):85,(0,1):2,(1,0):5	0:5,1:2	(0,0):189,(1,0):8	1904-01-01 00:08:00	22
AFE	152503@uc003imb.2@uc010ipm.1	ENSG00000109686	0.63	0.17	0.94	0.35	0.06	0.86	0.28	2.42	('23353@uc003sjk.1@uc003sje.1.A.0', '23353@uc003sjk.1@uc003sje.1.B.0_23353@uc003sjk.1@uc003sje.1.B.1')	(0,0):903,(1,0):72	0.05	(0,0):660,(0,1):1,(1,0):38	0:38,1:1	7
AFE	4820@uc003clr.1@uc003cll.1uc003clo.1	ENSG00000114857	0.34	0.04	0.73	0.69	0.36	0.94	-0.35	2.42	('10919@uc003scg.1@uc003nxx.1.A.0', '10919@uc003scg.1@uc003nxx.1.B.0')	(0,0):770715,(0,1):2	0:0,1:2	(0,0):559550,(0,1):2,(1,0):6	0:6,1:2	6
AFE	10107@uc003rud.1uc003rue.2@uc003rca.1uc003rcb.2	ENSG00000204613,ENSG00000233892,ENSG00000224486,ENSG00000234127,ENSG00000242996,ENSG00000231074	0.26	0.12	0.49	0.59	0.31	0.86	-0.33	2.41	('57724@uc002lbn.1@uc002lbm.1uc002lbo.1.A.1_57724@uc002lbn.1@uc002lbm.1uc002lbo.1.A.0', '57724@uc002lbn.1@uc002lbm.1uc002lbo.1.B.0')	(0,0):1410,(0,1):5,(1,0):11	0:11,1:5	(0,0):1137,(0,1):1,(1,0):12	0:12,1:1	18
AFE	10509@uc002bpa.1@uc002boy.1	ENSG00000225193,ENSG00000185033	0.8	0.64	0.9	0.57	0.42	0.75	0.23	2.4	('9147@uc001wxb.1@uc010anq.1.B.5_9147@uc001wxb.1@uc010anq.1.B.4_9147@uc001wxb.1@uc010anq.1.B.3_9147@uc001wxb.1@uc010anq.1.B.2_9147@uc001wxb.1@uc010anq.1.B.1_9147@uc001wxb.1@uc010anq.1.B.0', '9147@uc001wxb.1@uc010anq.1.A.2_9147@uc001wxb.1@uc010anq.1.A.1_9147@uc001wxb.1@uc010anq.1.A.0')	(0,0):1880,(0,1):4,(1,0):107	0:107,1:4	(0,0):1467,(0,1):10,(1,0):70	0:70,1:10	14
AFE	55619@uc002voa.1@uc002vob.2	ENSG00000135905	0.41	0.07	0.84	0.82	0.42	0.99	-0.41	2.4	('10251@uc010nvl.1@uc010nxp.1.A.0_10251@uc010nvl.1@uc010nxp.1.A.1', '10251@uc010nvl.1@uc010nxp.1.B.0_10251@uc010nvl.1@uc010nxp.1.B.1')	(0,0):885481,(0,1):1,(1,0):1	0:1,1:1	(0,0):796957,(1,0):3	1904-01-01 00:03:00	X
AFE	64506@uc002bip.1@uc002biq.1uc002bir.1	ENSG00000260836,ENSG00000214575	0.38	0.17	0.62	0.77	0.45	0.99	-0.39	2.4	('1375@uc003bmk.2@uc003bmt.1.B.1_1375@uc003bmk.2@uc003bmt.1.B.0', '1375@uc003bmk.2@uc003bmt.1.A.0')	(0,0):350,(0,1):4,(1,0):29	0:29,1:4	(0,0):199,(1,0):19	1904-01-01 00:19:00	22
AFE	113277@uc002idn.1@uc002kha.1	ENSG00000231784,ENSG00000262133,ENSG00000262003,ENSG00000263017,ENSG00000265403,ENSG00000235361,ENSG00000205899,ENSG00000262777,ENSG00000236618,ENSG00000228133,ENSG00000214014,ENSG00000108963,ENSG00000262664,ENSG00000177374,ENSG00000265777,ENSG00000236838,ENSG00000225084,ENSG00000262333,ENSG00000262456,ENSG00000239024,ENSG00000239884,ENSG00000262050,ENSG00000265566,ENSG00000142163,ENSG00000172150…	0.56	0.06	0.98	0.05	0.01	0.16	0.51	2.39	('29933@uc001yqc.1@uc001yqe.1.A.2_29933@uc001yqc.1@uc001yqe.1.A.1_29933@uc001yqc.1@uc001yqe.1.A.0', '29933@uc001yqc.1@uc001yqe.1.B.1_29933@uc001yqc.1@uc001yqe.1.B.0')	(0,0):28,(1,0):46	1904-01-01 00:46:00	(0,0):72,(0,1):3,(1,0):76	0:76,1:3	14
AFE	80313@uc001llk.2@uc001lli.1	ENSG00000148814	0.55	0.1	0.94	0.11	0.03	0.4	0.44	2.39	('80313@uc001llk.2@uc001lli.1.B.0_80313@uc001llk.2@uc001lli.1.B.1', '80313@uc001llk.2@uc001lli.1.A.0')	(0,0):193,(1,0):9	1904-01-01 00:09:00	(0,0):226,(0,1):3,(1,0):10	0:10,1:3	10
AFE	534@uc003ryp.1@uc003rgn.1	ENSG00000213760,ENSG00000227507,ENSG00000204475,ENSG00000230622,ENSG00000204463,ENSG00000204439,ENSG00000204438,ENSG00000204428,ENSG00000266776,ENSG00000255552,ENSG00000213722,ENSG00000254870,ENSG00000204421,ENSG00000204427,ENSG00000213719,ENSG00000204422	0.57	0.14	0.88	0.17	0.05	0.41	0.4	2.38	('51540@uc002vxm.2@uc002vxn.2uc010fyv.1.A.0_51540@uc002vxm.2@uc002vxn.2uc010fyv.1.A.1_51540@uc002vxm.2@uc002vxn.2uc010fyv.1.A.2_51540@uc002vxm.2@uc002vxn.2uc010fyv.1.A.3_51540@uc002vxm.2@uc002vxn.2uc010fyv.1.A.4_51540@uc002vxm.2@uc002vxn.2uc010fyv.1.A.5_51540@uc002vxm.2@uc002vxn.2uc010fyv.1.A.6_51540@uc002vxm.2@uc002vxn.2uc010fyv.1.A.7_51540@uc002vxm.2@uc002vxn.2uc010fyv.1.A.8', '51540@uc002vxm.2…	(0,0):2192,(1,0):42	1904-01-01 00:42:00	(0,0):2218,(0,1):4,(1,0):51	0:51,1:4	2
AFE	6880@uc003moo.1@uc003mol.1	ENSG00000085231	0.94	0.83	0.99	0.72	0.52	0.89	0.22	2.38	('4957@uc004bvh.1@uc004bvd.2.A.0', '4957@uc004bvh.1@uc004bvd.2.B.0_4957@uc004bvh.1@uc004bvd.2.B.1')	(0,0):3500,(0,1):1,(1,0):46	0:46,1:1	(0,0):1735,(0,1):4,(1,0):18	0:18,1:4	9
AFE	84912@uc010lml.1@uc003vrn.1uc003vro.2	ENSG00000205060	0.39	0.14	0.68	0.78	0.46	0.99	-0.39	2.38	('54507@uc009wlx.1@uc009wlv.1.A.0_54507@uc009wlx.1@uc009wlv.1.A.1', '54507@uc009wlx.1@uc009wlv.1.B.0_54507@uc009wlx.1@uc009wlv.1.B.1')	(0,0):160,(0,1):4,(1,0):3	0:3,1:4	(0,0):67,(1,0):4	1904-01-01 00:04:00	1
AFE	9564@uc002fdt.1@uc002fdw.1	ENSG00000050820	0.79	0.43	0.97	0.4	0.17	0.66	0.39	2.38	('121274@uc001rrn.1@uc001rro.1.B.1_121274@uc001rrn.1@uc001rro.1.B.0', '121274@uc001rrn.1@uc001rro.1.A.0')	(0,0):87,(1,0):24	1904-01-01 00:24:00	(0,0):89,(0,1):3,(1,0):13	0:13,1:3	12
AFE	9919@uc004chq.1@uc010nbo.1	ENSG00000148396	0.61	0.2	0.95	0.22	0.06	0.43	0.39	2.38	('862@uc003yfc.1@uc003yfe.1uc003yfh.1.A.0', '862@uc003yfc.1@uc003yfe.1uc003yfh.1.B.1_862@uc003yfc.1@uc003yfe.1uc003yfh.1.B.0')	(0,0):98,(0,1):1,(1,0):2	0:2,1:1	(0,0):1428,(0,1):11,(1,0):5	0:5,1:11	8
AFE	1808@uc003xfb.1@uc003xfa.2	ENSG00000253208,ENSG00000092964	0.05	0	0.35	0.48	0.09	0.92	-0.43	2.37	('54014@uc010goi.1@uc002yxk.1uc002yxl.1uc002yxm.1.B.0', '54014@uc010goi.1@uc002yxk.1uc002yxl.1uc002yxm.1.A.0')	(0,0):3892,(0,1):2,(1,0):10	0:10,1:2	(0,0):2949,(1,0):7	1904-01-01 00:07:00	21
AFE	23348@uc001vnq.1@uc001vnr.1	ENSG00000088387	0.82	0.47	0.99	0.37	0.04	0.81	0.45	2.37	('26960@uc010abj.1@uc010abi.1.B.0', '26960@uc010abj.1@uc010abi.1.A.0_26960@uc010abj.1@uc010abi.1.A.1')	(0,0):1883,(1,0):7	1904-01-01 00:07:00	(0,0):1610,(1,0):1	1904-01-01 00:01:00	13
AFE	4008@uc001vjv.1@uc001vjt.1	ENSG00000136153,ENSG00000261553	0.87	0.68	0.98	0.58	0.28	0.85	0.29	2.37	('7164@uc003pzz.1@uc003pzu.1uc003pzv.1uc003pzw.1.B.0', '7164@uc003pzz.1@uc003pzu.1uc003pzv.1uc003pzw.1.A.0_7164@uc003pzz.1@uc003pzu.1uc003pzv.1uc003pzw.1.A.1')	(0,0):421,(0,1):1,(1,0):34	0:34,1:1	(0,0):373,(0,1):2,(1,0):10	0:10,1:2	6
AFE	1201@uc002dpm.1@uc010byd.1	ENSG00000261832,ENSG00000188603	0.51	0.07	0.94	0.05	0	0.21	0.46	2.36	('6733@uc003vct.1@uc003vcv.1.A.0', '6733@uc003vct.1@uc003vcv.1.B.0')	(0,0):847,(1,0):2	1904-01-01 00:02:00	(0,0):1116,(0,1):2,(1,0):4	0:4,1:2	7
AFE	51172@uc010buc.1@uc002cyf.1	ENSG00000103174	0.8	0.56	0.99	0.52	0.33	0.69	0.28	2.36	('1639@uc002skt.1@uc002skx.1uc010ffd.1.A.0', '1639@uc002skt.1@uc002skx.1uc010ffd.1.B.0')	(0,0):2230,(0,1):1,(1,0):16	0:16,1:1	(0,0):1743,(0,1):7,(1,0):21	0:21,1:7	2
AFE	5218@uc003uku.1@uc003uky.1	ENSG00000223584,ENSG00000058091	0.52	0.2	0.9	0.15	0.05	0.32	0.37	2.36	('9759@uc010fyy.1@uc010fza.1.B.1_9759@uc010fyy.1@uc010fza.1.B.0', '9759@uc010fyy.1@uc010fza.1.A.0')	(0,0):937,(0,1):2,(1,0):12	0:12,1:2	(0,0):1358,(0,1):7,(1,0):7	0:7,1:7	2
AFE	7375@uc003cwo.1@uc003cwq.1uc003cwr.1	ENSG00000114316	0.13	0.01	0.52	0.61	0.13	0.97	-0.48	2.35	('5727@uc010mrs.1@uc010mro.1.B.2_5727@uc010mrs.1@uc010mro.1.B.1_5727@uc010mrs.1@uc010mro.1.B.0', '5727@uc010mrs.1@uc010mro.1.A.0')	(0,0):53,(0,1):2	0:0,1:2	(0,0):152,(1,0):7	1904-01-01 00:07:00	9
AFE	2051@uc003wbv.1@uc003wbu.1	ENSG00000106123	0.23	0	0.64	0.69	0.27	0.98	-0.46	2.34	('79925@uc003jjp.1@uc003jjn.1uc003jjq.2uc003jjo.1.A.0', '79925@uc003jjp.1@uc003jjn.1uc003jjq.2uc003jjo.1.B.0')	(0,0):286,(0,1):2,(1,0):1	0:1,1:2	(0,0):419,(1,0):2	1904-01-01 00:02:00	5
AFE	28227@uc004cpf.1@uc004fot.1	ENSG00000167393	0.33	0.06	0.8	0.76	0.29	0.98	-0.43	2.34	('84501@uc010cix.1@uc010civ.1.B.0_84501@uc010cix.1@uc010civ.1.B.1_84501@uc010cix.1@uc010civ.1.B.2', '84501@uc010cix.1@uc010civ.1.A.0')	(0,0):28,(0,1):1,(1,0):1	0:1,1:1	(0,0):87,(1,0):1	1904-01-01 00:01:00	16
AFE	9659@uc001emb.1@uc001elo.2uc001emh.2uc001emk.2	ENSG00000178104	0.25	0	0.78	0.6	0.06	0.95	-0.35	2.34	('23371@uc009zmr.1@uc001sbo.1uc001sbp.1.A.0', '23371@uc009zmr.1@uc001sbo.1uc001sbp.1.B.0')	(0,0):58,(0,1):1,(1,0):1	0:1,1:1	(0,0):86,(1,0):4	1904-01-01 00:04:00	12
AFE	113277@uc010cze.1@uc010dja.1	ENSG00000231784,ENSG00000262133,ENSG00000262003,ENSG00000263017,ENSG00000265403,ENSG00000235361,ENSG00000205899,ENSG00000262777,ENSG00000236618,ENSG00000228133,ENSG00000214014,ENSG00000108963,ENSG00000262664,ENSG00000177374,ENSG00000265777,ENSG00000236838,ENSG00000225084,ENSG00000262333,ENSG00000262456,ENSG00000239024,ENSG00000239884,ENSG00000262050,ENSG00000265566,ENSG00000142163,ENSG00000172150…	0.56	0.04	0.95	0.06	0.01	0.21	0.5	2.33	('23224@uc010aqa.1@uc010apx.1.A.0_23224@uc010aqa.1@uc010apx.1.A.1_23224@uc010aqa.1@uc010apx.1.A.2_23224@uc010aqa.1@uc010apx.1.A.3_23224@uc010aqa.1@uc010apx.1.A.4_23224@uc010aqa.1@uc010apx.1.A.5_23224@uc010aqa.1@uc010apx.1.A.6_23224@uc010aqa.1@uc010apx.1.A.7_23224@uc010aqa.1@uc010apx.1.A.8_23224@uc010aqa.1@uc010apx.1.A.9_23224@uc010aqa.1@uc010apx.1.A.10_23224@uc010aqa.1@uc010apx.1.A.11', '23224@uc…	(0,0):639,(1,0):22	1904-01-01 00:22:00	(0,0):885,(0,1):3,(1,0):21	0:21,1:3	14
AFE	55638@uc003ynj.2uc010mco.1@uc010mcs.1	ENSG00000147642	0.6	0.17	0.94	0.14	0	0.47	0.46	2.33	('4281@uc004cta.2uc004ctl.1@uc010ndv.1.A.0', '4281@uc004cta.2uc004ctl.1@uc010ndv.1.B.2_4281@uc004cta.2uc004ctl.1@uc010ndv.1.B.1_4281@uc004cta.2uc004ctl.1@uc010ndv.1.B.0')	(0,0):33,(1,0):1	1904-01-01 00:01:00	(0,0):84,(0,1):1	0:0,1:1	X
AFE	11188@uc003deh.2@uc003ded.2	ENSG00000010322	0.16	0.07	0.28	0.44	0.22	0.74	-0.28	2.31	('3320@uc001yku.2@uc001ykv.2.B.0', '3320@uc001yku.2@uc001ykv.2.A.0')	(0,0):510,(0,1):10,(1,0):31	0:31,1:10	(0,0):770,(0,1):3,(1,0):36	0:36,1:3	14
AFE	1801@uc002ftw.2@uc010cjx.1	ENSG00000108963	0.09	0.04	0.17	0.41	0.11	0.68	-0.32	2.31	('861@uc002yul.1@uc010gmu.1.B.1_861@uc002yul.1@uc010gmu.1.B.0', '861@uc002yul.1@uc010gmu.1.A.0')	(0,0):20435,(0,1):22,(1,0):9	0:9,1:22	(0,0):10529,(0,1):3,(1,0):7	0:7,1:3	21
AFE	23077@uc001vke.1@uc001vkf.1	ENSG00000005810	0.13	0.05	0.28	0.57	0.19	1	-0.44	2.31	('55764@uc003ems.1@uc003emp.1.B.0_55764@uc003ems.1@uc003emp.1.B.1_55764@uc003ems.1@uc003emp.1.B.2_55764@uc003ems.1@uc003emp.1.B.3_55764@uc003ems.1@uc003emp.1.B.4_55764@uc003ems.1@uc003emp.1.B.5_55764@uc003ems.1@uc003emp.1.B.6_55764@uc003ems.1@uc003emp.1.B.7', '55764@uc003ems.1@uc003emp.1.A.0')	(0,0):696,(0,1):5,(1,0):21	0:21,1:5	(0,0):575,(1,0):12	1904-01-01 00:12:00	3
AFE	3098@uc001jpl.2@uc001jpk.2	ENSG00000156515	0.1	0.05	0.22	0.47	0.15	0.93	-0.37	2.31	('100132247@uc010bxi.1@uc010bxh.1.B.0_100132247@uc010bxi.1@uc010bxh.1.B.1', '100132247@uc010bxi.1@uc010bxh.1.A.0')	(0,0):2382,(0,1):10,(1,0):28	0:28,1:10	(0,0):1726,(0,1):1,(1,0):16	0:16,1:1	16
AFE	89910@uc001tot.1@uc001tol.1uc001ton.2uc001toq.1	ENSG00000151148	0.14	0.03	0.34	0.62	0.16	0.99	-0.48	2.31	('4595@uc009vxn.1@uc001cnm.1uc001cnl.1uc009vxp.1uc001cnn.1.B.0', '4595@uc009vxn.1@uc001cnm.1uc001cnl.1uc009vxp.1uc001cnn.1.A.0')	(0,0):195,(0,1):4,(1,0):15	0:15,1:4	(0,0):187,(1,0):16	1904-01-01 00:16:00	1
AFE	9659@uc001emb.1@uc001emf.1	ENSG00000178104	0.64	0.12	0.99	0.1	0.02	0.38	0.54	2.31	('57696@uc001ufj.1@uc001ufi.1.A.0_57696@uc001ufj.1@uc001ufi.1.A.1_57696@uc001ufj.1@uc001ufi.1.A.2', '57696@uc001ufj.1@uc001ufi.1.B.0')	(0,0):640,(1,0):45	1904-01-01 00:45:00	(0,0):532,(0,1):2,(1,0):32	0:32,1:2	12
AFE	11093@uc004cdp.2@uc02244.uc004cdx.2	ENSG00000160323	0.05	0.01	0.17	0.52	0.07	0.92	-0.47	2.29	('145508@uc001xuy.1@uc001xva.1.B.3_145508@uc001xuy.1@uc001xva.1.B.2_145508@uc001xuy.1@uc001xva.1.B.1_145508@uc001xuy.1@uc001xva.1.B.0', '145508@uc001xuy.1@uc001xva.1.A.0')	(0,0):488,(0,1):3,(1,0):19	0:19,1:3	(0,0):462,(1,0):8	1904-01-01 00:08:00	14
AFE	57579@uc003pfp.2@uc003pfh.2	ENSG00000238386,ENSG00000082269	0.74	0.13	0.98	0.28	0.05	0.72	0.46	2.29	('29@uc002fsf.1@uc010cjq.1.A.0', '29@uc002fsf.1@uc010cjq.1.B.0')	(0,0):210,(1,0):1	1904-01-01 00:01:00	(0,0):442,(0,1):2	0:0,1:2	17
AFE	861@uc002yul.1@uc002yuh.1uc002yui.1uc002yuo.1	ENSG00000159216	0.3	0.04	0.73	0.68	0.11	1	-0.38	2.29	('57554@uc001dep.1@uc001deo.1.B.0', '57554@uc001dep.1@uc001deo.1.A.0')	(0,0):672,(0,1):1,(1,0):4	0:4,1:1	(0,0):1860,(1,0):7	1904-01-01 00:07:00	1
AFE	29@uc002fsf.1@uc010cjq.1	ENSG00000264429,ENSG00000159842	0.57	0.19	0.9	0.17	0.01	0.63	0.4	2.28	('79567@uc010cei.1@uc002eti.1.A.0_79567@uc010cei.1@uc002eti.1.A.1_79567@uc010cei.1@uc002eti.1.A.2_79567@uc010cei.1@uc002eti.1.A.3_79567@uc010cei.1@uc002eti.1.A.4_79567@uc010cei.1@uc002eti.1.A.5_79567@uc010cei.1@uc002eti.1.A.6', '79567@uc010cei.1@uc002eti.1.B.0')	(0,0):53,(1,0):10	1904-01-01 00:10:00	(0,0):92,(0,1):1,(1,0):7	0:7,1:1	16
AFE	29933@uc001yqc.1@uc001yqe.1	ENSG00000183484	0.32	0.19	0.48	0.6	0.38	0.85	-0.28	2.28	('55308@uc010cfr.1@uc002eyo.1uc002eyp.1uc002eys.1.A.0_55308@uc010cfr.1@uc002eyo.1uc002eyp.1uc002eys.1.A.1_55308@uc010cfr.1@uc002eyo.1uc002eyp.1uc002eys.1.A.2_55308@uc010cfr.1@uc002eyo.1uc002eyp.1uc002eys.1.A.3_55308@uc010cfr.1@uc002eyo.1uc002eyp.1uc002eys.1.A.4_55308@uc010cfr.1@uc002eyo.1uc002eyp.1uc002eys.1.A.5', '55308@uc010cfr.1@uc002eyo.1uc002eyp.1uc002eys.1.B.0')	(0,0):1771,(0,1):8,(1,0):152	0:152,1:8	(0,0):1737,(0,1):3,(1,0):172	0:172,1:3	16
AFE	1390@uc001iyq.1uc001iyr.1@uc001iya.1	ENSG00000253054,ENSG00000233343,ENSG00000095794	0.49	0.09	0.9	0.07	0	0.3	0.42	2.27	('84182@uc003tbu.1@uc003tbt.1.A.0', '84182@uc003tbu.1@uc003tbt.1.B.0')	(0,0):375,(1,0):11	1904-01-01 00:11:00	(0,0):522,(0,1):2,(1,0):10	0:10,1:2	7
AFE	57696@uc001ufj.1@uc001ufi.1	ENSG00000111364	0.25	0.11	0.51	0.73	0.22	0.98	-0.48	2.27	('6871@uc002hnw.1@uc002hnt.1.A.0_6871@uc002hnw.1@uc002hnt.1.A.1_6871@uc002hnw.1@uc002hnt.1.A.2_6871@uc002hnw.1@uc002hnt.1.A.3', '6871@uc002hnw.1@uc002hnt.1.B.0_6871@uc002hnw.1@uc002hnt.1.B.1')	(0,0):397,(0,1):5,(1,0):30	0:30,1:5	(0,0):285,(1,0):13	1904-01-01 00:13:00	17
AFE	7932@uc003qze.1@uc003rrj.1	ENSG00000199290,ENSG00000227758,ENSG00000204657,ENSG00000204655,ENSG00000204642	0.16	0.1	0.24	0.41	0.22	0.63	-0.25	2.27	('54801@uc003znl.1@uc003znk.1.B.0', '54801@uc003znl.1@uc003znk.1.A.0')	(0,0):659,(0,1):15,(1,0):179	0:179,1:15	(0,0):366,(0,1):4,(1,0):147	0:147,1:4	9
AFE	755@uc010gps.1@uc002zep.2uc002zeq.2uc002zer.2	ENSG00000160226	0.66	0.26	0.96	0.3	0.03	0.72	0.36	2.26	('65268@uc004atl.1@uc010mrd.1.A.0', '65268@uc004atl.1@uc010mrd.1.B.0_65268@uc004atl.1@uc010mrd.1.B.1')	(0,0):110,(1,0):4	1904-01-01 00:04:00	(0,0):277,(0,1):1	0:0,1:1	9
AFE	90273@uc002orc.1@uc002org.2uc002ore.2	ENSG00000007129	0.42	0.23	0.64	0.78	0.44	0.99	-0.36	2.26	('9659@uc001emb.1@uc001emf.1.A.0', '9659@uc001emb.1@uc001emf.1.B.1_9659@uc001emb.1@uc001emf.1.B.0')	(0,0):191,(0,1):6,(1,0):187	0:187,1:6	(0,0):178,(1,0):105	0.0729167	1
AFE	31@uc002hnl.1@uc002hno.1	ENSG00000132142	0.03	0.01	0.07	0.36	0.09	0.76	-0.33	2.25	('11273@uc002drg.1@uc01522.uc002dre.1.B.0', '11273@uc002drg.1@uc01521.uc002dre.1.A.0')	(0,0):1689,(0,1):12,(1,0):20	0:20,1:12	(0,0):767,(0,1):1,(1,0):13	0:13,1:1	16
AFE	7148@uc003nzg.1@uc010jts.1	ENSG00000252512,ENSG00000168477,ENSG00000213676	0.26	0.04	0.71	0.66	0.36	0.94	-0.4	2.23	('5727@uc010mro.1@uc010mrr.1uc004avo.2.A.2_5727@uc010mro.1@uc010mrr.1uc004avo.2.A.1_5727@uc010mro.1@uc010mrr.1uc004avo.2.A.0', '5727@uc010mro.1@uc010mrr.1uc004avo.2.B.0')	(0,0):74,(0,1):2	0:0,1:2	(0,0):195,(0,1):1,(1,0):7	0:7,1:1	9
AFE	80021@uc001zqt.1@uc001zqr.1	ENSG00000137842	0.71	0.3	0.94	0.29	0.05	0.66	0.42	2.23	('57412@uc009xxh.1uc001kwk.1@uc001kwj.1.B.0_57412@uc009xxh.1uc001kwk.1@uc001kwj.1.B.1_57412@uc009xxh.1uc001kwk.1@uc001kwj.1.B.2_57412@uc009xxh.1uc001kwk.1@uc001kwj.1.B.3_57412@uc009xxh.1uc001kwk.1@uc001kwj.1.B.4', '57412@uc009xxh.1uc001kwk.1@uc001kwj.1.A.0')	(0,0):272,(1,0):20	1904-01-01 00:20:00	(0,0):205,(0,1):1,(1,0):9	0:9,1:1	10
AFE	8867@uc002yqe.2@uc002yqf.1uc002yqg.1	ENSG00000159082	0.31	0.05	0.84	0.7	0.29	0.99	-0.39	2.23	('57554@uc001deq.1@uc001dep.1.A.0_57554@uc001deq.1@uc001dep.1.A.1', '57554@uc001deq.1@uc001dep.1.B.0')	(0,0):1209,(0,1):1,(1,0):12	0:12,1:1	(0,0):3061,(1,0):24	1904-01-01 00:24:00	1
AFE	89910@uc001tot.1@uc001tos.1	ENSG00000151148	0.3	0.04	0.67	0.67	0.17	0.97	-0.37	2.23	('5451@uc001geg.2@uc001gee.1.A.0', '5451@uc001geg.2@uc001gee.1.B.0_5451@uc001geg.2@uc001gee.1.B.1')	(0,0):1364,(0,1):2	0:0,1:2	(0,0):1464,(1,0):1	1904-01-01 00:01:00	1
AFE	9659@uc001emf.1@uc001elm.2	ENSG00000178104	0.13	0.04	0.25	0.41	0.17	0.63	-0.28	2.23	('64333@uc001snz.1@uc001soc.1.B.1_64333@uc001snz.1@uc001soc.1.B.0', '64333@uc001snz.1@uc001soc.1.A.1_64333@uc001snz.1@uc001soc.1.A.0')	(0,0):43,(0,1):22,(1,0):4	0:4,1:22	(0,0):24,(0,1):6,(1,0):6	0:6,1:6	12
AFE	29775@uc003asu.1@uc003asy.1	ENSG00000100065	0.27	0.06	0.61	0.65	0.26	0.97	-0.38	2.22	('9564@uc002fdt.1@uc002fdw.1.A.0', '9564@uc002fdt.1@uc002fdw.1.B.0')	(0,0):182,(0,1):1,(1,0):33	0:33,1:1	(0,0):361,(1,0):88	0.0611111	16
AFE	55249@uc001flg.1@uc009wqw.1	ENSG00000163374	0.72	0.33	0.97	0.35	0.17	0.61	0.37	2.22	('23133@uc004dsv.2@uc004dst.1.B.1_23133@uc004dsv.2@uc004dst.1.B.0', '23133@uc004dsv.2@uc004dst.1.A.0')	(0,0):184,(1,0):18	1904-01-01 00:18:00	(0,0):176,(0,1):3,(1,0):14	0:14,1:3	X
AFE	64506@uc002bis.1@uc002bit.1	ENSG00000214575	0.35	0.18	0.59	0.73	0.33	1	-0.38	2.22	('1375@uc003bmn.1uc003bmo.1@uc003bmt.1.B.1_1375@uc003bmn.1uc003bmo.1@uc003bmt.1.B.0', '1375@uc003bmn.1uc003bmo.1@uc003bmt.1.A.1_1375@uc003bmn.1uc003bmo.1@uc003bmt.1.A.0')	(0,0):348,(0,1):6,(1,0):29	0:29,1:6	(0,0):199,(1,0):19	1904-01-01 00:19:00	22
AFE	8379@uc003sld.1@uc003slf.1	ENSG00000002822	0.06	0.03	0.14	0.32	0.11	0.65	-0.26	2.22	('116983@uc001ady.1@uc001aea.1.B.1_116983@uc001ady.1@uc001aea.1.B.0', '116983@uc001ady.1@uc001aea.1.A.0')	(0,0):60,(0,1):8,(1,0):7	0:7,1:8	(0,0):68,(0,1):2,(1,0):11	0:11,1:2	1
AFE	64506@uc002biq.1uc002bir.1@uc002bit.1	ENSG00000214575	0.87	0.63	0.98	0.59	0.36	0.91	0.28	2.21	('25793@uc003amt.1@uc003amq.1.B.0', '25793@uc003amt.1@uc003amq.1.A.0')	(0,0):105,(1,0):84	0.0583333	(0,0):50,(0,1):2,(1,0):56	0:56,1:2	22
AFE	54801@uc003znl.1@uc003znk.1	ENSG00000147874	0.36	0.25	0.48	0.66	0.4	0.88	-0.3	2.2	('50804@uc001zwg.2@uc001zwl.2.A.0', '50804@uc001zwg.2@uc001zwl.2.B.3_50804@uc001zwg.2@uc001zwl.2.B.2_50804@uc001zwg.2@uc001zwl.2.B.1_50804@uc001zwg.2@uc001zwl.2.B.0')	(0,0):892,(0,1):31,(1,0):32	0:32,1:31	(0,0):273,(0,1):2,(1,0):8	0:8,1:2	15
AFE	57669@uc010flm.1@uc002tmh.2	ENSG00000115109	0.24	0.02	0.8	0.62	0.23	0.9	-0.38	2.2	('56934@uc002itu.2@uc002itw.2.B.0', '56934@uc002itu.2@uc002itw.2.A.0')	(0,0):578,(0,1):1,(1,0):1	0:1,1:1	(0,0):1984,(1,0):4	1904-01-01 00:04:00	17
AFE	2145@uc010cyr.1@uc002iaz.1uc002iba.1uc010cyq.1uc010cys.1	ENSG00000108799	0.73	0.32	0.98	0.32	0.1	0.65	0.41	2.19	('51194@uc003jte.1@uc003jtb.1.B.0_51194@uc003jte.1@uc003jtb.1.B.1', '51194@uc003jte.1@uc003jtb.1.A.0_51194@uc003jte.1@uc003jtb.1.A.1')	(0,0):5514,(1,0):4	1904-01-01 00:04:00	(0,0):4513,(0,1):4,(1,0):3	0:3,1:4	5
AFE	100132247@uc010bxi.1@uc010bxh.1	ENSG00000243716	0.08	0.03	0.16	0.31	0.13	0.57	-0.23	2.18	('753@uc002ksh.1uc002ksi.1@uc002kse.1uc002ksf.1.B.0', '753@uc002ksh.1uc002ksi.1@uc002kse.1uc002ksf.1.A.0')	(0,0):61,(0,1):12,(1,0):6	0:6,1:12	(0,0):65,(0,1):4,(1,0):12	0:12,1:4	18
AFE	1889@uc001bej.2@uc001bem.2	ENSG00000117298	0.11	0.07	0.19	0.39	0.16	0.76	-0.28	2.18	('755@uc010gps.1@uc002zep.2uc002zeq.2uc002zer.2.A.2_755@uc010gps.1@uc002zep.2uc002zeq.2uc002zer.2.A.1_755@uc010gps.1@uc002zep.2uc002zeq.2uc002zer.2.A.0', '755@uc010gps.1@uc002zep.2uc002zeq.2uc002zer.2.B.0')	(0,0):170,(0,1):15,(1,0):93	0:93,1:15	(0,0):106,(0,1):3,(1,0):64	0:64,1:3	21
AFE	6499@uc003nyn.1@uc003scw.1	ENSG00000219992,ENSG00000233068,ENSG00000217135,ENSG00000217566,ENSG00000216657,ENSG00000145965,ENSG00000252668,ENSG00000216307,ENSG00000201185,ENSG00000260239,ENSG00000205444,ENSG00000238801,ENSG00000217385,ENSG00000217030,ENSG00000219607,ENSG00000215057,ENSG00000264121,ENSG00000263572,ENSG00000218868,ENSG00000203498,ENSG00000225092,ENSG00000219993,ENSG00000236512,ENSG00000219294,ENSG00000251164…	0.32	0.08	0.73	0.69	0.34	0.93	-0.37	2.17	('55615@uc003bez.1@uc003bew.1.A.0_55615@uc003bez.1@uc003bew.1.A.1_55615@uc003bez.1@uc003bew.1.A.2_55615@uc003bez.1@uc003bew.1.A.3', '55615@uc003bez.1@uc003bew.1.B.0_55615@uc003bez.1@uc003bew.1.B.1')	(0,0):206,(0,1):2,(1,0):10	0:10,1:2	(0,0):368,(1,0):13	1904-01-01 00:13:00	22
AFE	9990@uc001zhu.1@uc001zid.1	ENSG00000140199	0.88	0.68	0.99	0.6	0.33	0.85	0.28	2.17	('8795@uc003xcs.1@uc003xcv.1.B.2_8795@uc003xcs.1@uc003xcv.1.B.1_8795@uc003xcs.1@uc003xcv.1.B.0', '8795@uc003xcs.1@uc003xcv.1.A.0')	(0,0):1774,(1,0):304	0.211111	(0,0):1081,(0,1):2,(1,0):159	0:159,1:2	8
AFE	51657@uc003ueg.1@uc003uen.1	ENSG00000127952	0.52	0.17	0.87	0.15	0.04	0.4	0.37	2.16	('65065@uc002uzt.2uc002uzs.2@uc002uzr.1.A.0', '65065@uc002uzt.2uc002uzs.2@uc002uzr.1.B.0')	(0,0):708,(0,1):1,(1,0):20	0:20,1:1	(0,0):849,(0,1):4,(1,0):13	0:13,1:4	2
AFE	6880@uc003mol.1@uc003moq.1	ENSG00000085231	0.43	0.23	0.69	0.78	0.52	0.96	-0.35	2.16	('3590@uc010mke.1@uc003zvi.1.B.0', '3590@uc010mke.1@uc003zvi.1.A.0_3590@uc010mke.1@uc003zvi.1.A.1_3590@uc010mke.1@uc003zvi.1.A.2_3590@uc010mke.1@uc003zvi.1.A.3_3590@uc010mke.1@uc003zvi.1.A.4')	(0,0):45,(0,1):4,(1,0):18	0:18,1:4	(0,0):26,(1,0):10	1904-01-01 00:10:00	9
AFE	861@uc002yul.1@uc010gmu.1	ENSG00000159216	0.35	0.05	0.82	0.75	0.35	0.97	-0.4	2.16	('8514@uc009vlw.1@uc001alx.1.B.0_8514@uc009vlw.1@uc001alx.1.B.1', '8514@uc009vlw.1@uc001alx.1.A.0_8514@uc009vlw.1@uc001alx.1.A.1_8514@uc009vlw.1@uc001alx.1.A.2')	(0,0):197,(0,1):1,(1,0):1	0:1,1:1	(0,0):200,(1,0):3	1904-01-01 00:03:00	1
AFE	57579@uc003pfo.1@uc003pfn.2	ENSG00000082269	0.93	0.8	0.99	0.66	0.4	0.88	0.27	2.15	('113277@uc010cze.1@uc002kha.1.A.0_113277@uc010cze.1@uc002kha.1.A.1_113277@uc010cze.1@uc002kha.1.A.2', '113277@uc010cze.1@uc002kha.1.B.0_113277@uc010cze.1@uc002kha.1.B.1_113277@uc010cze.1@uc002kha.1.B.2')	(0,0):1228702,(1,0):18	1904-01-01 00:18:00	(0,0):1001414,(0,1):3,(1,0):8	0:8,1:3	17
AFE	79711@uc001wmt.1@uc001wmz.1	ENSG00000254692,ENSG00000100926,ENSG00000259522,ENSG00000196497	0.6	0.01	1	0.38	0.03	0.87	0.22	2.15	('23203@uc004chm.1@uc004chl.1.A.0', '23203@uc004chm.1@uc004chl.1.B.0')	(0,0):897,(1,0):153	0.10625	(0,0):804,(1,0):131	0.0909722	9
AFE	861@uc002yul.1@uc002yuk.2	ENSG00000159216	0.33	0.19	0.49	0.13	0.04	0.25	0.2	2.15	('178@uc001dsn.1@uc001dsi.1.A.0', '178@uc001dsn.1@uc001dsi.1.B.0_178@uc001dsn.1@uc001dsi.1.B.1')	(0,0):122,(0,1):25,(1,0):13	0:13,1:25	(0,0):129,(0,1):28,(1,0):4	0:4,1:28	1
AFE	9581@uc002ruf.1uc002rug.1uc002ruh.1@uc002ruj.1	ENSG00000138078	0.2	0.1	0.34	0.46	0.24	0.72	-0.26	2.15	('64333@uc001snz.1@uc001sob.1.B.0', '64333@uc001snz.1@uc001sob.1.A.1_64333@uc001snz.1@uc001sob.1.A.0')	(0,0):34,(0,1):22,(1,0):13	0:13,1:22	(0,0):18,(0,1):6,(1,0):12	0:12,1:6	12
AFE	1102@uc001vci.1@uc001vcj.1	ENSG00000136161	0.5	0.1	0.89	0.1	0.01	0.45	0.4	2.14	('23224@uc010apx.1@uc001xgk.2uc001xgl.1uc001xgm.1.B.0_23224@uc010apx.1@uc001xgk.2uc001xgl.1uc001xgm.1.B.1', '23224@uc010apx.1@uc001xgk.2uc001xgl.1uc001xgm.1.A.0')	(0,0):637,(1,0):2	1904-01-01 00:02:00	(0,0):1244,(0,1):3,(1,0):1	0:1,1:3	14
AFE	115677@uc002uek.1@uc002uej.1	ENSG00000163072	0.29	0.04	0.78	0.67	0.22	0.99	-0.38	2.14	('29058@uc002wll.1@uc002wlk.1.A.2_29058@uc002wll.1@uc002wlk.1.A.1_29058@uc002wll.1@uc002wlk.1.A.0', '29058@uc002wll.1@uc002wlk.1.B.0')	(0,0):286,(1,0):45,(1,1):2	0:45,1:2	(0,0):251,(1,0):34	1904-01-01 00:34:00	20
AFE	6654@uc002rrj.2@uc002rrk.2	ENSG00000225900,ENSG00000115904	0.4	0.26	0.59	0.73	0.48	0.95	-0.33	2.14	('1375@uc003bmn.1uc003bmo.1@uc003bmu.1.B.1_1375@uc003bmn.1uc003bmo.1@uc003bmu.1.B.0', '1375@uc003bmn.1uc003bmo.1@uc003bmu.1.A.1_1375@uc003bmn.1uc003bmo.1@uc003bmu.1.A.0')	(0,0):295,(0,1):6,(1,0):82	0:82,1:6	(0,0):172,(1,0):46	1904-01-01 00:46:00	22
AFE	79567@uc010cei.1@uc002eti.1	ENSG00000039523	0.14	0	0.5	0.62	0.13	0.97	-0.48	2.14	('5727@uc010mrs.1@uc004avm.2.B.0', '5727@uc010mrs.1@uc004avm.2.A.0')	(0,0):80,(0,1):2	0:0,1:2	(0,0):235,(1,0):1	1904-01-01 00:01:00	9
AFE	80184@uc001taq.1@uc001tat.2	ENSG00000198707	0.2	0.05	0.52	0.59	0.15	0.95	-0.39	2.14	('657@uc001kdz.1@uc001kdy.1.B.0_657@uc001kdz.1@uc001kdy.1.B.1_657@uc001kdz.1@uc001kdy.1.B.2', '657@uc001kdz.1@uc001kdy.1.A.0')	(0,0):628,(0,1):2,(1,0):27	0:27,1:2	(0,0):764,(1,0):30	1904-01-01 00:30:00	10
AFE	26960@uc010abj.1@uc010abi.1	ENSG00000232795,ENSG00000234835,ENSG00000172915	0.49	0.16	0.89	0.1	0	0.38	0.39	2.13	('5143@uc010ebk.1@uc002nil.2.B.4_5143@uc010ebk.1@uc002nil.2.B.3_5143@uc010ebk.1@uc002nil.2.B.2_5143@uc010ebk.1@uc002nil.2.B.1_5143@uc010ebk.1@uc002nil.2.B.0', '5143@uc010ebk.1@uc002nil.2.A.1_5143@uc010ebk.1@uc002nil.2.A.0')	(0,0):45,(0,1):1,(1,0):1	0:1,1:1	(0,0):258,(0,1):3	0:0,1:3	19
AFE	27106@uc002nhv.1@uc002nhu.1	ENSG00000105643	0.09	0.01	0.29	0.4	0.13	0.79	-0.31	2.13	('2217@uc002poi.1@uc002pog.1.A.0', '2217@uc002poi.1@uc002pog.1.B.0')	(0,0):261,(0,1):4,(1,0):1	0:1,1:4	(0,0):147,(0,1):2,(1,0):8	0:8,1:2	19
AFE	3801@uc010cdf.1@uc002emp.1uc002emq.1	ENSG00000140859	0.24	0.07	0.63	0.63	0.18	0.93	-0.39	2.13	('667@uc003pcw.2@uc003pdf.1.A.0', '667@uc003pcw.2@uc003pdf.1.B.0')	(0,0):6637,(0,1):2,(1,0):36	0:36,1:2	(0,0):4817,(1,0):20	1904-01-01 00:20:00	6
AFE	54840@uc003zrj.1@uc003zrr.1	ENSG00000137074	0.36	0.21	0.57	0.64	0.43	0.83	-0.28	2.13	('64506@uc002bip.1@uc002biq.1uc002bir.1.A.0', '64506@uc002bip.1@uc002biq.1uc002bir.1.B.1_64506@uc002bip.1@uc002biq.1uc002bir.1.B.0')	(0,0):219,(0,1):7,(1,0):15	0:15,1:7	(0,0):204,(0,1):3,(1,0):25	0:25,1:3	15
AFE	4439@uc003nwy.1@uc003sbi.1uc003sbj.1uc003sbk.1	ENSG00000261015,ENSG00000232654,ENSG00000229282,ENSG00000217707,ENSG00000219992,ENSG00000233068,ENSG00000217135,ENSG00000217566,ENSG00000216657,ENSG00000145965,ENSG00000252668,ENSG00000216307,ENSG00000201185,ENSG00000260239,ENSG00000205444,ENSG00000238801,ENSG00000217385,ENSG00000217030,ENSG00000219607,ENSG00000215057,ENSG00000264121,ENSG00000263572,ENSG00000218868,ENSG00000203498,ENSG00000225092…	0.17	0.09	0.27	0.46	0.2	0.78	-0.29	2.12	('57579@uc010kan.1@uc003pfl.2.B.0_57579@uc010kan.1@uc003pfl.2.B.1_57579@uc010kan.1@uc003pfl.2.B.2_57579@uc010kan.1@uc003pfl.2.B.3', '57579@uc010kan.1@uc003pfl.2.A.0')	(0,0):3645,(0,1):11,(1,0):47	0:47,1:11	(0,0):1506,(0,1):2,(1,0):25	0:25,1:2	6
AFE	1186@uc010brq.1@uc002clu.2	ENSG00000103249	0.08	0.01	0.41	0.56	0.06	0.96	-0.48	2.11	('51657@uc003uei.1uc003ueh.1@uc003uen.1.A.1_51657@uc003uei.1uc003ueh.1@uc003uen.1.A.0', '51657@uc003uei.1uc003ueh.1@uc003uen.1.B.0')	(0,0):128,(0,1):3,(1,0):24	0:24,1:3	(0,0):108,(1,0):12	1904-01-01 00:12:00	7
AFE	153129@uc010ivx.1@uc010ivy.1	ENSG00000177058	0.57	0.17	0.97	0.11	0.02	0.34	0.46	2.11	('83637@uc003tlu.1@uc003tlq.1.A.0', '83637@uc003tlu.1@uc003tlq.1.B.0_83637@uc003tlu.1@uc003tlq.1.B.1')	(0,0):452,(1,0):11	1904-01-01 00:11:00	(0,0):356,(0,1):2,(1,0):6	0:6,1:2	7
AFE	8541@uc002pmt.1@uc002pmr.1	ENSG00000177380	0.5	0.36	0.65	0.3	0.18	0.44	0.2	2.11	('9857@uc001gnv.1@uc001gnr.1.B.0', '9857@uc001gnv.1@uc001gnr.1.A.0_9857@uc001gnv.1@uc001gnr.1.A.1')	(0,0):4092,(0,1):22,(1,0):44	0:44,1:22	(0,0):3310,(0,1):21,(1,0):16	0:16,1:21	1
AFE	1759@uc004bub.1@uc010mxr.1uc010mxs.1uc010mxt.1uc010mxu.1uc010mxv.1	ENSG00000106976	0.24	0.11	0.47	0.55	0.29	0.85	-0.31	2.1	('54468@uc010ktq.1@uc003srg.1.B.0', '54468@uc010ktq.1@uc003srg.1.A.0')	(0,0):132,(0,1):7,(1,0):33	0:33,1:7	(0,0):124,(0,1):2,(1,0):42	0:42,1:2	7
AFE	2550@uc003qzb.2uc003qzf.2@uc003nmw.2	ENSG00000261730,ENSG00000218027,ENSG00000266252,ENSG00000164385,ENSG00000266750,ENSG00000232999,ENSG00000233763,ENSG00000222248,ENSG00000137267,ENSG00000218472,ENSG00000260604,ENSG00000230648,ENSG00000237716,ENSG00000231811,ENSG00000260673,ENSG00000236336,ENSG00000220685,ENSG00000265083,ENSG00000264541,ENSG00000220446,ENSG00000218574,ENSG00000217239,ENSG00000216360,ENSG00000230770,ENSG00000239472…	0.24	0.01	0.75	0.56	0.19	0.98	-0.32	2.1	('84162@uc003iem.1@uc010ins.1.B.0_84162@uc003iem.1@uc010ins.1.B.1_84162@uc003iem.1@uc010ins.1.B.2_84162@uc003iem.1@uc010ins.1.B.3_84162@uc003iem.1@uc010ins.1.B.4_84162@uc003iem.1@uc010ins.1.B.5_84162@uc003iem.1@uc010ins.1.B.6_84162@uc003iem.1@uc010ins.1.B.7', '84162@uc003iem.1@uc010ins.1.A.0')	(0,0):3368,(0,1):1,(1,0):59	0:59,1:1	(0,0):2473,(1,0):39	1904-01-01 00:39:00	4
AFE	57554@uc001deq.1@uc009wbg.1	ENSG00000240692,ENSG00000229359,ENSG00000033122	0.21	0.02	0.67	0.61	0.22	0.93	-0.4	2.1	('56934@uc002itu.2@uc002itx.2.B.1_56934@uc002itu.2@uc002itx.2.B.0', '56934@uc002itu.2@uc002itx.2.A.0')	(0,0):580,(0,1):1,(1,0):1	0:1,1:1	(0,0):1986,(1,0):4	1904-01-01 00:04:00	17
AFE	8379@uc003sld.1@uc003slg.1	ENSG00000002822	0.43	0.23	0.67	0.73	0.44	0.93	-0.3	2.1	('9659@uc001emf.1@uc001elk.1uc001elw.2uc001emc.1uc001emd.1uc001emg.1.B.0', '9659@uc001emf.1@uc001elk.1uc001elw.2uc001emc.1uc001emd.1uc001emg.1.A.1_9659@uc001emf.1@uc001elk.1uc001elw.2uc001emc.1uc001emd.1uc001emg.1.A.0')	(0,0):2043,(0,1):6,(1,0):19	0:19,1:6	(0,0):1945,(1,0):12	1904-01-01 00:12:00	1
AFE	23049@uc010bwa.1@uc002dfm.1	ENSG00000238329,ENSG00000157106	0.64	0.44	0.83	0.31	0.06	0.7	0.33	2.09	('132160@uc003ddh.2@uc003ddf.2uc010hmd.1.B.0_132160@uc003ddh.2@uc003ddf.2uc010hmd.1.B.1_132160@uc003ddh.2@uc003ddf.2uc010hmd.1.B.2', '132160@uc003ddh.2@uc003ddf.2uc010hmd.1.A.0')	(0,0):241,(0,1):5,(1,0):43	0:43,1:5	(0,0):62,(0,1):2,(1,0):3	0:3,1:2	3
AFE	25852@uc003esf.1@uc003erx.1	ENSG00000114098	0.36	0.15	0.69	0.78	0.32	1	-0.42	2.09	('284309@uc002qqc.1@uc002qqa.1.B.0', '284309@uc002qqc.1@uc002qqa.1.A.0')	(0,0):193,(0,1):2,(1,0):24	0:24,1:2	(0,0):120,(1,0):27	1904-01-01 00:27:00	19
AFE	6452@uc003gfm.2@uc003gfi.2	ENSG00000087266	0.74	0.47	0.97	0.4	0.19	0.71	0.34	2.09	('25793@uc003amp.1uc003amr.1@uc003amt.1.A.0_25793@uc003amp.1uc003amr.1@uc003amt.1.A.1', '25793@uc003amp.1uc003amr.1@uc003amt.1.B.0')	(0,0):554,(1,0):97	0.0673611	(0,0):308,(0,1):2,(1,0):62	0:62,1:2	22
AFE	84182@uc003tbu.1@uc003tbt.1	ENSG00000106125,ENSG00000254959,ENSG00000240583,ENSG00000250424	0.2	0.05	0.53	0.57	0.25	0.94	-0.37	2.09	('7799@uc001avk.1@uc001avh.1uc001avi.1.B.0_7799@uc001avk.1@uc001avh.1uc001avi.1.B.1', '7799@uc001avk.1@uc001avh.1uc001avi.1.A.0_7799@uc001avk.1@uc001avh.1uc001avi.1.A.1_7799@uc001avk.1@uc001avh.1uc001avi.1.A.2')	(0,0):1014,(0,1):3,(1,0):5	0:5,1:3	(0,0):1033,(0,1):1,(1,0):12	0:12,1:1	1
AFE	3305@uc010kna.1@uc010jte.1	ENSG00000218472,ENSG00000260604,ENSG00000230648,ENSG00000237716,ENSG00000231811,ENSG00000260673,ENSG00000236336,ENSG00000220685,ENSG00000265083,ENSG00000264541,ENSG00000220446,ENSG00000218574,ENSG00000217239,ENSG00000216360,ENSG00000230770,ENSG00000239472,ENSG00000124785,ENSG00000241216,ENSG00000261211,ENSG00000224532,ENSG00000219986,ENSG00000240936,ENSG00000251762,ENSG00000201483,ENSG00000220472…	0.61	0.22	0.96	0.21	0.03	0.55	0.4	2.08	('4855@uc003sez.1uc003sfa.2@uc003rnh.1.B.0', '4855@uc003sez.1uc003sfa.2@uc003rnh.1.A.0')	(0,0):492,(1,0):4	1904-01-01 00:04:00	(0,0):1079,(0,1):1,(1,0):14	0:14,1:1	6
AFE	51657@uc003uei.1uc003ueh.1@uc003uen.1	ENSG00000127952	0.65	0.08	0.95	0.18	0.03	0.56	0.47	2.08	('115677@uc002uej.1@uc002ueg.1uc010fpu.1.A.0_115677@uc002uej.1@uc002ueg.1uc010fpu.1.A.1_115677@uc002uej.1@uc002ueg.1uc010fpu.1.A.2_115677@uc002uej.1@uc002ueg.1uc010fpu.1.A.3_115677@uc002uej.1@uc002ueg.1uc010fpu.1.A.4', '115677@uc002uej.1@uc002ueg.1uc010fpu.1.B.0')	(0,0):148,(1,0):2	1904-01-01 00:02:00	(0,0):198,(0,1):2	0:0,1:2	2
AFE	58499@uc004bdb.1@uc004bcz.1	ENSG00000242631,ENSG00000148143	0.95	0.86	1	0.68	0.44	0.87	0.27	2.08	('113277@uc010cze.1@uc010dja.1.A.0_113277@uc010cze.1@uc010dja.1.A.1_113277@uc010cze.1@uc010dja.1.A.2', '113277@uc010cze.1@uc010dja.1.B.0_113277@uc010cze.1@uc010dja.1.B.1_113277@uc010cze.1@uc010dja.1.B.2')	(0,0):1228702,(1,0):18	1904-01-01 00:18:00	(0,0):1001414,(0,1):3,(1,0):8	0:8,1:3	17
AFE	93343@uc002ngq.1@uc002ngn.1uc002ngo.1	ENSG00000141971	0.76	0.43	0.97	0.41	0.16	0.77	0.35	2.08	('80003@uc001hvq.1@uc001hvl.2.B.0', '80003@uc001hvq.1@uc001hvl.2.A.0')	(0,0):270,(0,1):1,(1,0):7	0:7,1:1	(0,0):270,(0,1):3,(1,0):3	0:3,1:3	1
AFE	25771@uc003bif.1@uc003bib.1uc003bic.1uc003bie.1	ENSG00000054611	0.72	0.3	0.98	0.28	0.09	0.59	0.44	2.07	('287@uc010imr.1uc010ims.1@uc003ibg.2.B.0_287@uc010imr.1uc010ims.1@uc003ibg.2.B.1', '287@uc010imr.1uc010ims.1@uc003ibg.2.A.0')	(0,0):756,(1,0):17	1904-01-01 00:17:00	(0,0):410,(0,1):2,(1,0):6	0:6,1:2	4
AFE	2783@uc003uwf.1@uc003uwb.1	ENSG00000172354	0.08	0.04	0.14	0.46	0.11	0.84	-0.38	2.07	('11273@uc002drg.1@uc002drf.1.B.0_11273@uc002drg.1@uc002drf.1.B.1_11273@uc002drg.1@uc002drf.1.B.2_11273@uc002drg.1@uc002drf.1.B.3_11273@uc002drg.1@uc002drf.1.B.4_11273@uc002drg.1@uc002drf.1.B.5_11273@uc002drg.1@uc002drf.1.B.6', '11273@uc002drg.1@uc002drf.1.A.0')	(0,0):1225,(0,1):12,(1,0):228	0:228,1:12	(0,0):581,(0,1):1,(1,0):81	0:81,1:1	16
AFE	8514@uc009vlw.1@uc001alx.1	ENSG00000069424	0.71	0.21	1	0.44	0.11	0.91	0.27	2.07	('54856@uc001flx.1@uc009wri.1.B.7_54856@uc001flx.1@uc009wri.1.B.6_54856@uc001flx.1@uc009wri.1.B.5_54856@uc001flx.1@uc009wri.1.B.4_54856@uc001flx.1@uc009wri.1.B.3_54856@uc001flx.1@uc009wri.1.B.2_54856@uc001flx.1@uc009wri.1.B.1_54856@uc001flx.1@uc009wri.1.B.0', '54856@uc001flx.1@uc009wri.1.A.0')	(0,0):2462,(1,0):383	0.265972	(0,0):2106,(0,1):1,(1,0):297	0:297,1:1	1
AFE	23240@uc010ipr.1@uc010ipp.1uc003inm.2	ENSG00000121210	0.13	0	0.73	0.5	0.15	0.92	-0.37	2.06	('11343@uc003ejv.1@uc003ejx.1uc010hsp.1.A.0', '11343@uc003ejv.1@uc003ejx.1uc010hsp.1.B.1_11343@uc003ejv.1@uc003ejx.1uc010hsp.1.B.0')	(0,0):174,(0,1):2	0:0,1:2	(0,0):375,(1,0):3	1904-01-01 00:03:00	3
AFE	253018@uc003nsw.1@uc003rxm.1	ENSG00000228365,ENSG00000244041,ENSG00000261015,ENSG00000232654,ENSG00000229282,ENSG00000217707,ENSG00000219992,ENSG00000233068,ENSG00000217135,ENSG00000217566,ENSG00000216657,ENSG00000145965,ENSG00000252668,ENSG00000216307,ENSG00000201185,ENSG00000260239,ENSG00000205444,ENSG00000238801,ENSG00000217385,ENSG00000217030,ENSG00000219607,ENSG00000215057,ENSG00000264121,ENSG00000263572,ENSG00000218868…	0.1	0.05	0.18	0.31	0.15	0.52	-0.21	2.06	('23077@uc001vke.1@uc001vkf.1.B.1_23077@uc001vke.1@uc001vkf.1.B.0', '23077@uc001vke.1@uc001vkf.1.A.0')	(0,0):9248,(0,1):15,(1,0):10	0:10,1:15	(0,0):7190,(0,1):6,(1,0):17	0:17,1:6	13
AFE	4281@uc004cta.2uc004ctl.1@uc010ndv.1	ENSG00000101871	0.89	0.76	0.98	0.65	0.45	0.82	0.24	2.06	('9374@uc003rmg.1@uc010kqr.1.A.0_9374@uc003rmg.1@uc010kqr.1.A.1', '9374@uc003rmg.1@uc010kqr.1.B.0')	(0,0):7049,(0,1):1,(1,0):68	0:68,1:1	(0,0):4989,(0,1):5,(1,0):39	0:39,1:5	6
AFE	9696@uc009voz.1@uc001azt.2	ENSG00000058453	0.46	0.12	0.83	0.11	0.02	0.27	0.35	2.06	('1808@uc003xfb.1@uc003xfa.2.B.0', '1808@uc003xfb.1@uc003xfa.2.A.0')	(0,0):138,(0,1):2,(1,0):1	0:1,1:2	(0,0):324,(0,1):15,(1,0):1	0:1,1:15	8
AFE	7275@uc001mga.1@uc001mfy.1	ENSG00000248332,ENSG00000166402	0.26	0.02	0.79	0.73	0.34	0.99	-0.47	2.05	('1759@uc004bub.1@uc010mxr.1uc010mxs.1uc010mxt.1uc010mxu.1uc010mxv.1.A.0_1759@uc004bub.1@uc010mxr.1uc010mxs.1uc010mxt.1uc010mxu.1uc010mxv.1.A.1_1759@uc004bub.1@uc010mxr.1uc010mxs.1uc010mxt.1uc010mxu.1uc010mxv.1.A.2_1759@uc004bub.1@uc010mxr.1uc010mxs.1uc010mxt.1uc010mxu.1uc010mxv.1.A.3', '1759@uc004bub.1@uc010mxr.1uc010mxs.1uc010mxt.1uc010mxu.1uc010mxv.1.B.0')	(0,0):31,(0,1):1	0:0,1:1	(0,0):115,(1,0):2	1904-01-01 00:02:00	9
AFE	753@uc002ksh.1uc002ksi.1@uc002kse.1uc002ksf.1	ENSG00000168675	0.75	0.34	0.99	0.36	0.18	0.58	0.39	2.05	('5727@uc010mrn.1@uc010mrq.1.A.0', '5727@uc010mrn.1@uc010mrq.1.B.2_5727@uc010mrn.1@uc010mrq.1.B.1_5727@uc010mrn.1@uc010mrq.1.B.0')	(0,0):113,(1,0):4	1904-01-01 00:04:00	(0,0):387,(0,1):4,(1,0):7	0:7,1:4	9
AFE	11270@uc003rdr.1@uc003nrc.1	ENSG00000266252,ENSG00000164385,ENSG00000266750,ENSG00000232999,ENSG00000233763,ENSG00000222248,ENSG00000137267,ENSG00000218472,ENSG00000260604,ENSG00000230648,ENSG00000237716,ENSG00000231811,ENSG00000260673,ENSG00000236336,ENSG00000220685,ENSG00000265083,ENSG00000264541,ENSG00000220446,ENSG00000218574,ENSG00000217239,ENSG00000216360,ENSG00000230770,ENSG00000239472,ENSG00000124785,ENSG00000241216…	0.54	0.05	0.95	0.03	0.01	0.12	0.51	2.04	('79711@uc001wmt.1@uc001wmv.1.B.0', '79711@uc001wmt.1@uc001wmv.1.A.0')	(0,0):800,(1,0):116	0.0805556	(0,0):944,(0,1):4,(1,0):102	0:102,1:4	14
AFE	116983@uc001ady.1@uc001aea.1	ENSG00000131584	0.54	0.24	0.89	0.19	0.06	0.41	0.35	2.04	('9139@uc002wzk.1@uc002wzh.1.A.0_9139@uc002wzk.1@uc002wzh.1.A.1', '9139@uc002wzk.1@uc002wzh.1.B.0_9139@uc002wzk.1@uc002wzh.1.B.1')	(0,0):481,(0,1):1,(1,0):7	0:7,1:1	(0,0):606,(0,1):6,(1,0):7	0:7,1:6	20
AFE	23371@uc009zmr.1@uc001sbo.1uc001sbp.1	ENSG00000111077	0.73	0.32	0.98	0.31	0.02	0.85	0.42	2.04	('113622@uc001vtp.1@uc001vtq.1.A.1_113622@uc001vtp.1@uc001vtq.1.A.0', '113622@uc001vtp.1@uc001vtq.1.B.0')	(0,0):46,(1,0):3	1904-01-01 00:03:00	(0,0):56,(0,1):2	0:0,1:2	13
AFE	55764@uc003ems.1@uc003emp.1	ENSG00000163913	0.24	0.08	0.55	0.57	0.31	0.82	-0.33	2.04	('6103@uc004dee.1@uc004deb.1uc004ded.1.A.1_6103@uc004dee.1@uc004deb.1uc004ded.1.A.0', '6103@uc004dee.1@uc004deb.1uc004ded.1.B.0')	(0,0):285,(0,1):4,(1,0):4	0:4,1:4	(0,0):264,(0,1):2,(1,0):11	0:11,1:2	X
AFE	9759@uc010fyy.1@uc010fza.1	ENSG00000264292,ENSG00000068024	0.77	0.29	0.99	0.38	0.11	0.77	0.39	2.04	('55638@uc003ynj.2uc010mco.1@uc010mcs.1.B.1_55638@uc003ynj.2uc010mco.1@uc010mcs.1.B.0', '55638@uc003ynj.2uc010mco.1@uc010mcs.1.A.0')	(0,0):652,(1,0):16	1904-01-01 00:16:00	(0,0):399,(0,1):1,(1,0):7	0:7,1:1	8
AFE	23345@uc003qop.2@uc010kja.1	ENSG00000131018	0.81	0.55	0.99	0.46	0.27	0.81	0.35	2.03	('23077@uc010aev.1@uc001vkf.1.A.12_23077@uc010aev.1@uc001vkf.1.A.11_23077@uc010aev.1@uc001vkf.1.A.10_23077@uc010aev.1@uc001vkf.1.A.9_23077@uc010aev.1@uc001vkf.1.A.8_23077@uc010aev.1@uc001vkf.1.A.7_23077@uc010aev.1@uc001vkf.1.A.6_23077@uc010aev.1@uc001vkf.1.A.5_23077@uc010aev.1@uc001vkf.1.A.4_23077@uc010aev.1@uc001vkf.1.A.3_23077@uc010aev.1@uc001vkf.1.A.2_23077@uc010aev.1@uc001vkf.1.A.1_23077@uc01…	(0,0):1727,(1,0):446,(1,1):10	0:455,1:1	(0,0):1314,(1,0):312,(1,1):17	0:315,1:14	13
AFE	80003@uc001hvq.1@uc001hvl.2	ENSG00000251508,ENSG00000231940,ENSG00000135749	0.39	0.16	0.66	0.78	0.23	1	-0.39	2.03	('5214@uc009xht.1@uc009xhr.1.A.0', '5214@uc009xht.1@uc009xhr.1.B.0_5214@uc009xht.1@uc009xhr.1.B.1')	(0,0):1547,(0,1):4,(1,0):3	0:3,1:4	(0,0):1059,(1,0):2	1904-01-01 00:02:00	10
AFE	10062@uc001nep.1@uc001neo.1	ENSG00000025434	0.5	0.21	0.88	0.2	0.09	0.4	0.3	2.02	('7050@uc002kmc.1@uc002klv.1.A.0', '7050@uc002kmc.1@uc002klv.1.B.0')	(0,0):940,(0,1):2,(1,0):129	0:129,1:2	(0,0):592,(0,1):5,(1,0):88	0:88,1:5	18
AFE	146909@uc002iht.1@uc002ihu.1	ENSG00000186185	0.7	0.41	0.9	0.35	0.18	0.61	0.35	2.02	('56996@uc003uws.1@uc003uwq.2.A.0_56996@uc003uws.1@uc003uwq.2.A.1_56996@uc003uws.1@uc003uwq.2.A.2_56996@uc003uws.1@uc003uwq.2.A.3_56996@uc003uws.1@uc003uwq.2.A.4', '56996@uc003uws.1@uc003uwq.2.B.0_56996@uc003uws.1@uc003uwq.2.B.1')	(0,0):178,(0,1):1,(1,0):149	0:149,1:1	(0,0):188,(0,1):5,(1,0):121	0:121,1:5	7
AFE	23203@uc004chm.1@uc004chl.1	ENSG00000165688	0.25	0.14	0.41	0.57	0.31	0.86	-0.32	2.02	('27031@uc003eoz.1@uc003epe.1.B.0', '27031@uc003eoz.1@uc003epe.1.A.0')	(0,0):947,(0,1):12,(1,0):25	0:25,1:12	(0,0):702,(0,1):2,(1,0):20	0:20,1:2	3
AFE	287@uc010imr.1uc010ims.1@uc003ibg.2	ENSG00000145362	0.87	0.58	1	0.56	0.27	0.85	0.31	2.02	('1201@uc002dpm.1@uc010byd.1.B.1_1201@uc002dpm.1@uc010byd.1.B.0', '1201@uc002dpm.1@uc010byd.1.A.1_1201@uc002dpm.1@uc010byd.1.A.0')	(0,0):246,(1,0):14	1904-01-01 00:14:00	(0,0):206,(0,1):2,(1,0):10,(1,1):1	0:10,1:3	16
AFE	4820@uc003clq.1@uc003cll.1uc003clo.1	ENSG00000114857	0.26	0.01	0.75	0.67	0.31	0.98	-0.41	2.02	('26716@uc003qyw.1@uc010koq.1.A.0_26716@uc003qyw.1@uc010koq.1.A.1_26716@uc003qyw.1@uc010koq.1.A.2', '26716@uc003qyw.1@uc010koq.1.B.0')	(0,0):471,(0,1):1,(1,0):3	0:3,1:1	(0,0):998,(1,0):14	1904-01-01 00:14:00	6
AFE	5218@uc003ukt.1@uc003uky.1	ENSG00000223584,ENSG00000251154,ENSG00000157224,ENSG00000058091	0.21	0.05	0.48	0.58	0.23	0.88	-0.37	2.02	('55619@uc002voa.1@uc002vob.2.A.1_55619@uc002voa.1@uc002vob.2.A.0', '55619@uc002voa.1@uc002vob.2.B.0')	(0,0):569,(0,1):4,(1,0):3	0:3,1:4	(0,0):1128,(0,1):1,(1,0):9	0:9,1:1	2
AFE	7799@uc001avk.1@uc001avh.1uc001avi.1	ENSG00000116731	0.17	0.09	0.3	0.53	0.22	0.95	-0.36	2.02	('54840@uc003zrk.1@uc003zrr.1.A.3_54840@uc003zrk.1@uc003zrr.1.A.2_54840@uc003zrk.1@uc003zrr.1.A.1_54840@uc003zrk.1@uc003zrr.1.A.0', '54840@uc003zrk.1@uc003zrr.1.B.1_54840@uc003zrk.1@uc003zrr.1.B.0')	(0,0):319,(0,1):4,(1,0):63,(1,1):8	0:65,1:10	(0,0):346,(1,0):46,(1,1):4	0:48,1:2	9
AFE	79902@uc002jnh.1@uc002jng.1uc010dgd.1	ENSG00000125450	0.27	0.1	0.49	0.62	0.29	0.87	-0.35	2.02	('27343@uc001ktd.1@uc001ktl.1.A.0', '27343@uc001ktd.1@uc001ktl.1.B.2_27343@uc001ktd.1@uc001ktl.1.B.1_27343@uc001ktd.1@uc001ktl.1.B.0')	(0,0):176,(0,1):11,(1,0):4	0:4,1:11	(0,0):112,(0,1):2,(1,0):4	0:4,1:2	10
AFE	51194@uc003jte.1@uc003jtb.1	ENSG00000199279,ENSG00000186105,ENSG00000068796,ENSG00000086200	0.14	0.02	0.49	0.53	0.18	0.95	-0.39	2.01	('4430@uc002usu.1@uc002usq.1uc010fsg.1.B.0_4430@uc002usu.1@uc002usq.1uc010fsg.1.B.1', '4430@uc002usu.1@uc002usq.1uc010fsg.1.A.0_4430@uc002usu.1@uc002usq.1uc010fsg.1.A.1')	(0,0):273,(0,1):4,(1,0):1	0:1,1:4	(0,0):753,(0,1):1,(1,0):2	0:2,1:1	2
AFE	657@uc001kdz.1@uc001kdy.1	ENSG00000200176,ENSG00000107779	0.45	0.16	0.82	0.8	0.41	1	-0.35	2.01	('29775@uc003asu.1@uc003asy.1.B.0', '29775@uc003asu.1@uc003asy.1.A.1_29775@uc003asu.1@uc003asy.1.A.0')	(0,0):175,(0,1):2,(1,0):3	0:3,1:2	(0,0):132,(1,0):5	1904-01-01 00:05:00	22
AFE	79711@uc001wmt.1@uc001wmx.1	ENSG00000254692,ENSG00000100926,ENSG00000259522,ENSG00000196497	0.43	0.32	0.55	0.68	0.46	0.87	-0.25	2.01	('11064@uc004bkz.1uc004bla.1@uc004bky.1.B.0_11064@uc004bkz.1uc004bla.1@uc004bky.1.B.1', '11064@uc004bkz.1uc004bla.1@uc004bky.1.A.0_11064@uc004bkz.1uc004bla.1@uc004bky.1.A.1')	(0,0):431,(0,1):35,(1,0):37	0:37,1:35	(0,0):167,(0,1):4,(1,0):14	0:14,1:4	9
AFE	10395@uc003wwl.1@uc003wwm.1uc003wwn.1	ENSG00000253257,ENSG00000164741	0.49	0.06	0.96	0.04	0	0.42	0.45	2	('79711@uc001wmt.1@uc001wmy.1.B.3_79711@uc001wmt.1@uc001wmy.1.B.2_79711@uc001wmt.1@uc001wmy.1.B.1_79711@uc001wmt.1@uc001wmy.1.B.0', '79711@uc001wmt.1@uc001wmy.1.A.0')	(0,0):748,(1,0):168	0.116667	(0,0):872,(0,1):4,(1,0):174	0:174,1:4	14
ALE	10345@uc003pzk.1@uc010kem.1uc003pzj.1	ENSG00000186439	0.24	0.18	0.3	0.46	0.4	0.52	-0.22	1000000000000	('10345@uc003pzk.1@uc010kem.1uc003pzj.1.A.0', '10345@uc003pzk.1@uc010kem.1uc003pzj.1.B.0')	(0,0):814,(0,1):125,(1,0):52	0:52,1:125	(0,0):1334,(0,1):126,(1,0):144	0:144,1:126	6
ALE	124565@uc002kab.1@uc002jzy.1uc002jzz.1	ENSG00000157637	0.56	0.52	0.59	0.33	0.29	0.37	0.23	1000000000000	('124565@uc002kab.1@uc002jzy.1uc002jzz.1.B.0', '124565@uc002kab.1@uc002jzy.1uc002jzz.1.A.0')	(0,0):384,(0,1):195,(1,0):819	0:819,1:195	(0,0):198,(0,1):185,(1,0):300	0:300,1:185	17
ALE	23309@uc002new.2@uc002ney.1uc002nez.1uc010eaj.1	ENSG00000127511	0.76	0.72	0.79	0.47	0.44	0.51	0.29	1000000000000	('23309@uc002new.2@uc002ney.1uc002nez.1uc010eaj.1.B.0', '23309@uc002new.2@uc002ney.1uc002nez.1uc010eaj.1.A.0')	(0,0):1650,(0,1):173,(1,0):656	0:656,1:173	(0,0):1389,(0,1):401,(1,0):441	0:441,1:401	19
ALE	3304@uc003sbt.2@uc003rjw.2	ENSG00000227198,ENSG00000201207,ENSG00000240053,ENSG00000250641,ENSG00000204424,ENSG00000244355,ENSG00000228727,ENSG00000204388,ENSG00000204469,ENSG00000263020,ENSG00000204444,ENSG00000204420,ENSG00000204435,ENSG00000204389,ENSG00000204410,ENSG00000255152	0.42	0.39	0.44	0.17	0.15	0.18	0.25	1000000000000	('3304@uc003sbt.2@uc003rjw.2.A.0', '3304@uc003sbt.2@uc003rjw.2.B.0')	(0,0):55659,(0,1):854,(1,0):607	0:607,1:854	(0,0):31724,(0,1):1727,(1,0):344	0:344,1:1727	6
ALE	376940@uc002thr.1@uc002thq.1	ENSG00000248341,ENSG00000188177	0.86	0.7	0.96	0.35	0.24	0.49	0.51	1000000000000	('376940@uc002thr.1@uc002thq.1.B.0', '376940@uc002thr.1@uc002thq.1.A.0')	(0,0):114,(0,1):2,(1,0):81	0:81,1:2	(0,0):106,(0,1):19,(1,0):39	0:39,1:19	2
ALE	4065@uc002ubc.2@uc002uba.1uc002ubb.2uc010fos.1	ENSG00000241399,ENSG00000054219,ENSG00000248672	0.39	0.35	0.43	0.69	0.64	0.74	-0.3	1000000000000	('4065@uc002ubc.2@uc002uba.1uc002ubb.2uc010fos.1.B.0', '4065@uc002ubc.2@uc002uba.1uc002ubb.2uc010fos.1.A.0')	(0,0):690,(0,1):280,(1,0):337	0:337,1:280	(0,0):576,(0,1):67,(1,0):285	0:285,1:67	2
ALE	4763@uc010csn.1@uc002hgg.1uc002hgh.1uc010cso.1	ENSG00000263535,ENSG00000196712	0.72	0.68	0.74	0.51	0.47	0.56	0.21	1000000000000	('4763@uc010csn.1@uc002hgg.1uc002hgh.1uc010cso.1.B.0', '4763@uc010csn.1@uc002hgg.1uc002hgh.1uc010cso.1.A.0')	(0,0):4566,(0,1):206,(1,0):687	0:687,1:206	(0,0):3622,(0,1):253,(1,0):356	0:356,1:253	17
ALE	4928@uc001lyj.1uc001lyk.1@uc001lyg.1uc001lyh.1uc001lyi.1	ENSG00000110713	0.79	0.76	0.82	0.58	0.54	0.62	0.21	1000000000000	('4928@uc001lyj.1uc001lyk.1@uc001lyg.1uc001lyh.1uc001lyi.1.B.0', '4928@uc001lyj.1uc001lyk.1@uc001lyg.1uc001lyh.1uc001lyi.1.A.0')	(0,0):4202,(0,1):145,(1,0):991	0:991,1:145	(0,0):3140,(0,1):237,(1,0):603	0:603,1:237	11
ALE	7109@uc002zdz.2@uc002zea.1uc010gpo.1	ENSG00000160218	0.67	0.62	0.73	0.38	0.34	0.43	0.29	1000000000000	('7109@uc002zdz.2@uc002zea.1uc010gpo.1.B.0', '7109@uc002zdz.2@uc002zea.1uc010gpo.1.A.0')	(0,0):2630,(0,1):64,(1,0):912	0:912,1:64	(0,0):2091,(0,1):130,(1,0):562	0:562,1:130	21
ALE	90326@uc001aoc.2uc001aod.2@uc001aoe.1	ENSG00000041988	0.32	0.29	0.35	0.52	0.47	0.57	-0.2	1000000000000	('90326@uc001aoc.2uc001aod.2@uc001aoe.1.B.0', '90326@uc001aoc.2uc001aod.2@uc001aoe.1.A.0')	(0,0):104,(0,1):271,(1,0):367	0:367,1:271	(0,0):115,(0,1):145,(1,0):450	0:450,1:145	1
ALE	9647@uc002zvq.2@uc002zvp.1	ENSG00000100034	0.89	0.84	0.94	0.65	0.58	0.71	0.24	1000000000000	('9647@uc002zvq.2@uc002zvp.1.B.0', '9647@uc002zvq.2@uc002zvp.1.A.0')	(0,0):153,(0,1):14,(1,0):1070	0:1070,1:14	(0,0):119,(0,1):52,(1,0):825	0:825,1:52	22
ALE	64081@uc001jnv.1@uc001jnr.1uc001jns.1uc001jnt.1	ENSG00000108187	0.07	0.01	0.2	0.72	0.45	0.93	-0.65	3.45027e+07	('64081@uc001jnv.1@uc001jnr.1uc001jns.1uc001jnt.1.A.0', '64081@uc001jnv.1@uc001jnr.1uc001jns.1uc001jnt.1.B.0')	(0,0):12,(0,1):19,(1,0):1	0:1,1:19	(0,0):9,(0,1):3,(1,0):10	0:10,1:3	10
ALE	115704@uc002mio.1@uc002min.1	ENSG00000142459	0.05	0.02	0.08	0.34	0.21	0.47	-0.29	2.03181e+06	('115704@uc002mio.1@uc002min.1.A.0', '115704@uc002mio.1@uc002min.1.B.0')	(0,0):112,(0,1):125,(1,0):8	0:8,1:125	(0,0):50,(0,1):26,(1,0):20	0:20,1:26	19
ALE	114788@uc003ynx.2@uc003yns.1uc003ynt.1uc003ynu.1uc003ynv.1	ENSG00000238656,ENSG00000164796	0.16	0.11	0.23	0.52	0.4	0.65	-0.36	690209	('114788@uc003ynx.2@uc003yns.1uc003ynt.1uc003ynu.1uc003ynv.1.A.0', '114788@uc003ynx.2@uc003yns.1uc003ynt.1uc003ynu.1uc003ynv.1.B.0')	(0,0):11165,(0,1):43,(1,0):25	0:25,1:43	(0,0):13117,(0,1):19,(1,0):63	0:63,1:19	8
ALE	11078@uc003atq.1uc003atr.1@uc003att.1uc003atu.1uc003atw.1uc010gxh.1	ENSG00000100106,ENSG00000100101	0.04	0.01	0.08	0.3	0.18	0.44	-0.26	98472.6	('11078@uc003atq.1uc003atr.1@uc003att.1uc003atu.1uc003atw.1uc010gxh.1.A.0', '11078@uc003atq.1uc003atr.1@uc003att.1uc003atu.1uc003atw.1uc010gxh.1.B.1_11078@uc003atq.1uc003atr.1@uc003att.1uc003atu.1uc003atw.1uc010gxh.1.B.0')	(0,0):730,(0,1):96,(1,0):3	0:3,1:96	(0,0):432,(0,1):29,(1,0):13	0:13,1:29	22
ALE	85015@uc003ppz.1uc003pqa.1@uc003ppw.1uc003ppx.1	ENSG00000123552	0.49	0.41	0.57	0.27	0.22	0.34	0.22	80777.1	('85015@uc003ppz.1uc003pqa.1@uc003ppw.1uc003ppx.1.B.0', '85015@uc003ppz.1uc003pqa.1@uc003ppw.1uc003ppx.1.A.0')	(0,0):2016,(0,1):39,(1,0):426	0:426,1:39	(0,0):1002,(0,1):45,(1,0):190	0:190,1:45	6
ALE	219790@uc001jlx.2@uc009xpf.1	ENSG00000182010	0.92	0.81	0.99	0.44	0.23	0.69	0.48	50431.1	('219790@uc001jlx.2@uc009xpf.1.A.0', '219790@uc001jlx.2@uc009xpf.1.B.0')	(0,0):254,(0,1):2,(1,0):40	0:40,1:2	(0,0):224,(0,1):7,(1,0):7	0:7,1:7	10
ALE	3113@uc003ocs.1@uc003rpa.1	ENSG00000260673,ENSG00000236336,ENSG00000220685,ENSG00000265083,ENSG00000264541,ENSG00000220446,ENSG00000218574,ENSG00000217239,ENSG00000216360,ENSG00000230770,ENSG00000239472,ENSG00000124785,ENSG00000241216,ENSG00000261211,ENSG00000224532,ENSG00000219986,ENSG00000240936,ENSG00000251762,ENSG00000201483,ENSG00000220472,ENSG00000219375,ENSG00000230570,ENSG00000233503,ENSG00000234115,ENSG00000261189…	0.73	0.34	0.99	0.03	0	0.1	0.7	16965.7	('3113@uc003ocs.1@uc003rpa.1.B.0_3113@uc003ocs.1@uc003rpa.1.B.1', '3113@uc003ocs.1@uc003rpa.1.A.0_3113@uc003ocs.1@uc003rpa.1.A.1')	(0,0):784668,(1,0):2	1904-01-01 00:02:00	(0,0):563612,(0,1):30	0:0,1:30	6
ALE	11078@uc003ats.1@uc003att.1uc003atu.1uc003atw.1uc010gxh.1	ENSG00000100106,ENSG00000100101	0.03	0.01	0.07	0.28	0.17	0.42	-0.25	2262.21	('11078@uc003ats.1@uc003att.1uc003atu.1uc003atw.1uc010gxh.1.A.0', '11078@uc003ats.1@uc003att.1uc003atu.1uc003atw.1uc010gxh.1.B.1_11078@uc003ats.1@uc003att.1uc003atu.1uc003atw.1uc010gxh.1.B.0')	(0,0):730,(0,1):96,(1,0):3	0:3,1:96	(0,0):432,(0,1):29,(1,0):13	0:13,1:29	22
ALE	3953@uc001dcg.1uc001dcj.1@uc001dch.1uc001dck.1	ENSG00000116678	0.78	0.69	0.86	0.54	0.46	0.63	0.24	1978.33	('3953@uc001dcg.1uc001dcj.1@uc001dch.1uc001dck.1.B.0', '3953@uc001dcg.1uc001dcj.1@uc001dch.1uc001dck.1.A.0')	(0,0):745,(0,1):14,(1,0):7649	0:7649,1:14	(0,0):593,(0,1):31,(1,0):5519	0:5519,1:31	1
ALE	201299@uc002hki.1@uc2538.uc010cud.1	ENSG00000187456	0.05	0	0.19	0.72	0.33	0.97	-0.67	1956.68	('201299@uc002hki.1@uc2542.uc010cud.1.B.0', '201299@uc002hki.1@uc2541.uc010cud.1.A.0')	(0,0):28,(0,1):4	0:0,1:4	(0,0):25,(1,0):4	1904-01-01 00:04:00	17
ALE	116496@uc009wyi.1@uc009wyh.1	ENSG00000135842	0.71	0.55	0.84	0.19	0.06	0.39	0.52	1353.5	('116496@uc009wyi.1@uc009wyh.1.A.0', '116496@uc009wyi.1@uc009wyh.1.B.0')	(0,0):264,(0,1):10,(1,0):46	0:46,1:10	(0,0):51,(0,1):9,(1,0):3	0:3,1:9	1
ALE	3113@uc003rpa.1@uc003sgl.1	ENSG00000228688,ENSG00000237398,ENSG00000204231,ENSG00000231389,ENSG00000231461,ENSG00000204248,ENSG00000223501	0.74	0.32	0.99	0.05	0	0.14	0.69	1032.3	('3113@uc003rpa.1@uc003sgl.1.A.0_3113@uc003rpa.1@uc003sgl.1.A.1', '3113@uc003rpa.1@uc003sgl.1.B.0_3113@uc003rpa.1@uc003sgl.1.B.1')	(0,0):7372,(1,0):2	1904-01-01 00:02:00	(0,0):5397,(0,1):30	0:0,1:30	6
ALE	199953@uc001apy.1@uc001apz.1	ENSG00000188807	0.47	0.39	0.55	0.7	0.63	0.76	-0.23	617.44	('199953@uc001apy.1@uc001apz.1.A.0', '199953@uc001apy.1@uc001apz.1.B.0')	(0,0):94,(0,1):59,(1,0):84	0:84,1:59	(0,0):109,(0,1):48,(1,0):179	0:179,1:48	1
ALE	10107@uc003rcb.2@uc003rue.2	ENSG00000204613,ENSG00000233892,ENSG00000234127,ENSG00000242996,ENSG00000231074	0.13	0.03	0.28	0.51	0.34	0.67	-0.38	564.43	('10107@uc003rcb.2@uc003rue.2.A.0', '10107@uc003rcb.2@uc003rue.2.B.0')	(0,0):7487,(0,1):24,(1,0):3	0:3,1:24	(0,0):4664,(0,1):15,(1,0):16	0:16,1:15	6
ALE	7145@uc002vgu.2@uc002vgq.2uc002vgr.2uc002vgs.2uc002vgt.2	ENSG00000256309,ENSG00000079308	0.84	0.49	0.99	0.25	0.13	0.44	0.59	402.21	('7145@uc002vgu.2@uc002vgq.2uc002vgr.2uc002vgs.2uc002vgt.2.B.0', '7145@uc002vgu.2@uc002vgq.2uc002vgr.2uc002vgs.2uc002vgt.2.A.0')	(0,0):173,(1,0):77	0.0534722	(0,0):280,(0,1):6,(1,0):53	0:53,1:6	2
ALE	10556@uc009xtx.1@uc001khd.2	ENSG00000148688	0.3	0.23	0.37	0.53	0.44	0.62	-0.23	370.59	('10556@uc009xtx.1@uc001khd.2.B.1_10556@uc009xtx.1@uc001khd.2.B.0', '10556@uc009xtx.1@uc001khd.2.A.0')	(0,0):88,(0,1):65,(1,0):64	0:64,1:65	(0,0):85,(0,1):37,(1,0):99	0:99,1:37	10
ALE	55727@uc001ybr.1@uc010aur.1uc001ybo.1uc001ybp.1	ENSG00000011114	0.77	0.7	0.85	0.54	0.46	0.64	0.23	265.75	('55727@uc001ybr.1@uc010aur.1uc001ybo.1uc001ybp.1.B.0', '55727@uc001ybr.1@uc010aur.1uc001ybo.1uc001ybp.1.A.0')	(0,0):625,(0,1):21,(1,0):526	0:526,1:21	(0,0):551,(0,1):36,(1,0):302	0:302,1:36	14
ALE	10107@uc003rcb.2@uc003rud.1	ENSG00000204613,ENSG00000233892,ENSG00000234127,ENSG00000242996,ENSG00000231074	0.12	0.03	0.25	0.49	0.32	0.65	-0.37	254.05	('10107@uc003rcb.2@uc003rud.1.A.0', '10107@uc003rcb.2@uc003rud.1.B.0')	(0,0):7491,(0,1):20,(1,0):3	0:3,1:20	(0,0):4667,(0,1):12,(1,0):16	0:16,1:12	6
ALE	124989@uc002ill.1@uc002iln.1	ENSG00000178852	0.12	0.07	0.17	0.43	0.27	0.63	-0.31	203.47	('124989@uc002ill.1@uc002iln.1.B.0', '124989@uc002ill.1@uc002iln.1.A.0')	(0,0):1140,(0,1):49,(1,0):20	0:20,1:49	(0,0):1078,(0,1):8,(1,0):19	0:19,1:8	17
ALE	84947@uc010kjq.1@uc003qrb.1uc003qrc.1	ENSG00000122335	0.92	0.84	0.98	0.67	0.55	0.79	0.25	198.65	('84947@uc010kjq.1@uc003qrb.1uc003qrc.1.B.0', '84947@uc010kjq.1@uc003qrb.1uc003qrc.1.A.0')	(0,0):472,(0,1):4,(1,0):140	0:140,1:4	(0,0):355,(0,1):15,(1,0):78	0:78,1:15	6
ALE	4065@uc010fot.1@uc002uba.1uc002ubb.2uc010fos.1	ENSG00000227055,ENSG00000241399,ENSG00000054219,ENSG00000248672	0.69	0.6	0.78	0.93	0.84	0.99	-0.24	190.29	('4065@uc010fot.1@uc002uba.1uc002ubb.2uc010fos.1.B.0', '4065@uc010fot.1@uc002uba.1uc002ubb.2uc010fos.1.A.0')	(0,0):2579,(0,1):23,(1,0):337	0:337,1:23	(0,0):1358,(0,1):2,(1,0):285	0:285,1:2	2
ALE	79969@uc003rvf.2uc003rvg.2@uc003rde.2uc003rdf.2	ENSG00000266183,ENSG00000204564,ENSG00000196230,ENSG00000263608,ENSG00000137343,ENSG00000228022,ENSG00000224328	0.93	0.81	1	0.59	0.41	0.78	0.34	142.13	('79969@uc003rvf.2uc003rvg.2@uc003rde.2uc003rdf.2.A.0', '79969@uc003rvf.2uc003rvg.2@uc003rde.2uc003rdf.2.B.0')	(0,0):30810,(1,0):33	1904-01-01 00:33:00	(0,0):35786,(0,1):7,(1,0):20	0:20,1:7	6
ALE	124989@uc002ill.1@uc002ilm.2	ENSG00000178852	0.11	0.07	0.17	0.46	0.29	0.65	-0.35	141.32	('124989@uc002ill.1@uc002ilm.2.B.0', '124989@uc002ill.1@uc002ilm.2.A.0')	(0,0):818,(0,1):49,(1,0):19	0:19,1:49	(0,0):770,(0,1):8,(1,0):22	0:22,1:8	17
ALE	253018@uc003rfk.1@uc003nsw.1	ENSG00000228365,ENSG00000244041,ENSG00000261015,ENSG00000232654,ENSG00000229282,ENSG00000217707,ENSG00000219992,ENSG00000233068,ENSG00000217135,ENSG00000217566,ENSG00000216657,ENSG00000145965,ENSG00000252668,ENSG00000216307,ENSG00000201185,ENSG00000260239,ENSG00000205444,ENSG00000238801,ENSG00000217385,ENSG00000217030,ENSG00000219607,ENSG00000215057,ENSG00000264121,ENSG00000263572,ENSG00000218868…	0.04	0.01	0.08	0.28	0.15	0.45	-0.24	121.82	('253018@uc003rfk.1@uc003nsw.1.A.0', '253018@uc003rfk.1@uc003nsw.1.B.0')	(0,0):709218,(0,1):114,(1,0):4	0:4,1:114	(0,0):521343,(0,1):19,(1,0):7	0:7,1:19	6
ALE	3082@uc003uhp.1@uc003uhl.1uc003uhm.1	ENSG00000019991	0.14	0.05	0.28	0.51	0.29	0.76	-0.37	114.91	('3082@uc003uhp.1@uc003uhl.1uc003uhm.1.A.0', '3082@uc003uhp.1@uc003uhl.1uc003uhm.1.B.0')	(0,0):94,(0,1):12,(1,0):5	0:5,1:12	(0,0):167,(0,1):4,(1,0):12	0:12,1:4	7
ALE	56946@uc001oxj.2@uc001oxl.1uc001oxm.1uc001oxn.1uc001oxp.1	ENSG00000158636	0.6	0.51	0.69	0.37	0.3	0.45	0.23	107.79	('56946@uc001oxj.2@uc001oxl.1uc001oxm.1uc001oxn.1uc001oxp.1.B.0', '56946@uc001oxj.2@uc001oxl.1uc001oxm.1uc001oxn.1uc001oxp.1.A.0')	(0,0):3253,(0,1):28,(1,0):195	0:195,1:28	(0,0):2409,(0,1):44,(1,0):119	0:119,1:44	11
ALE	4591@uc002iwz.2uc002ixa.2@uc002iwy.2	ENSG00000216168,ENSG00000108395	0.4	0.3	0.52	0.8	0.59	0.94	-0.4	105.93	('4591@uc002iwz.2uc002ixa.2@uc002iwy.2.A.0', '4591@uc002iwz.2uc002ixa.2@uc002iwy.2.B.0')	(0,0):165,(0,1):17,(1,0):285	0:285,1:17	(0,0):135,(0,1):2,(1,0):238	0:238,1:2	17
ALE	3257@uc001kpl.1@uc001kpj.1uc001kpk.1	ENSG00000107521	0.64	0.55	0.72	0.4	0.3	0.5	0.24	85.32	('3257@uc001kpl.1@uc001kpj.1uc001kpk.1.B.0', '3257@uc001kpl.1@uc001kpj.1uc001kpk.1.A.0')	(0,0):540,(0,1):36,(1,0):128	0:128,1:36	(0,0):216,(0,1):32,(1,0):42	0:42,1:32	10
ALE	3113@uc003rpa.1@uc010kri.1	ENSG00000228688,ENSG00000237398,ENSG00000204231,ENSG00000231389,ENSG00000231461,ENSG00000204248,ENSG00000223501	0.69	0.24	0.97	0.04	0	0.15	0.65	81.72	('3113@uc003rpa.1@uc010kri.1.A.0_3113@uc003rpa.1@uc010kri.1.A.1', '3113@uc003rpa.1@uc010kri.1.B.0')	(0,0):7363,(1,0):2	1904-01-01 00:02:00	(0,0):5368,(0,1):8	0:0,1:8	6
ALE	6349@uc002hlf.1@uc002kig.1	ENSG00000243704,ENSG00000238946,ENSG00000167705,ENSG00000199060,ENSG00000185561,ENSG00000186594,ENSG00000265504,ENSG00000108958,ENSG00000262869,ENSG00000262533,ENSG00000263050,ENSG00000207724,ENSG00000207953,ENSG00000262402,ENSG00000236457,ENSG00000212163,ENSG00000212552,ENSG00000263345,ENSG00000243049,ENSG00000262480,ENSG00000221200,ENSG00000262628,ENSG00000182880,ENSG00000184166,ENSG00000183024…	0.26	0.13	0.4	0.03	0.01	0.07	0.23	79.38	('6349@uc002hlf.1@uc002kig.1.B.0', '6349@uc002hlf.1@uc002kig.1.A.0')	(0,0):947438,(0,1):25,(1,0):8	0:8,1:25	(0,0):771661,(0,1):110,(1,0):3	0:3,1:110	17
ALE	27111@uc010gac.1@uc002weu.2uc002wev.2	ENSG00000125775	0.07	0	0.19	0.52	0.27	0.82	-0.45	77.83	('27111@uc010gac.1@uc002weu.2uc002wev.2.A.0', '27111@uc010gac.1@uc002weu.2uc002wev.2.B.0')	(0,0):46,(0,1):12,(1,0):1	0:1,1:12	(0,0):32,(0,1):3,(1,0):7	0:7,1:3	20
ALE	9677@uc001zsa.2@uc001zru.1uc001zrw.1uc001zrx.1uc001zry.2	ENSG00000168781	0.92	0.79	0.99	0.49	0.28	0.75	0.43	73.2	('9677@uc001zsa.2@uc001zru.1uc001zrw.1uc001zrx.1uc001zry.2.B.0', '9677@uc001zsa.2@uc001zru.1uc001zrw.1uc001zrx.1uc001zry.2.A.0')	(0,0):324,(1,0):232	0.161111	(0,0):255,(0,1):4,(1,0):78	0:78,1:4	15
ALE	57714@uc002jyf.1@uc002jyg.1	ENSG00000173821	0.11	0.08	0.16	0.35	0.22	0.5	-0.24	64.33	('57714@uc002jyf.1@uc002jyg.1.A.0', '57714@uc002jyf.1@uc002jyg.1.B.0')	(0,0):639,(0,1):56,(1,0):34	0:34,1:56	(0,0):355,(0,1):13,(1,0):32	0:32,1:13	17
ALE	11030@uc010lvh.1@uc003xic.1	ENSG00000157110	0.95	0.84	1	0.58	0.36	0.81	0.37	61.84	('11030@uc010lvh.1@uc003xic.1.B.3_11030@uc010lvh.1@uc003xic.1.B.2_11030@uc010lvh.1@uc003xic.1.B.1_11030@uc010lvh.1@uc003xic.1.B.0', '11030@uc010lvh.1@uc003xic.1.A.0')	(0,0):158,(1,0):35	1904-01-01 00:35:00	(0,0):214,(0,1):5,(1,0):15	0:15,1:5	8
ALE	6710@uc001xht.1uc001xhu.1@uc010aqi.1uc001xhr.1uc001xhs.1	ENSG00000070182	0.38	0.17	0.65	0.05	0.03	0.08	0.33	61.64	('6710@uc001xht.1uc001xhu.1@uc010aqi.1uc001xhr.1uc001xhs.1.B.0', '6710@uc001xht.1uc001xhu.1@uc010aqi.1uc001xhr.1uc001xhs.1.A.0')	(0,0):48,(0,1):3,(1,0):51	0:51,1:3	(0,0):122,(0,1):34,(1,0):66	0:66,1:34	14
ALE	9619@uc010gpb.1@uc0062.uc002zar.1	ENSG00000160179	0.95	0.9	0.98	0.66	0.44	0.84	0.29	60.4	('9619@uc010gpb.1@uc0066.uc002zar.1.B.0', '9619@uc010gpb.1@uc0065.uc002zar.1.A.0')	(0,0):35,(0,1):3,(1,0):126	0:126,1:3	(0,0):12,(0,1):5,(1,0):19	0:19,1:5	21
ALE	222255@uc003vdi.2@uc003vde.2	ENSG00000146776	0.8	0.68	0.89	0.5	0.36	0.65	0.3	59.63	('222255@uc003vdi.2@uc003vde.2.B.0', '222255@uc003vdi.2@uc003vde.2.A.0')	(0,0):895,(0,1):9,(1,0):109	0:109,1:9	(0,0):860,(0,1):18,(1,0):53	0:53,1:18	7
ALE	79969@uc003rvf.2uc003rvg.2@uc003rdc.2uc003rdd.2	ENSG00000266183,ENSG00000204564,ENSG00000196230,ENSG00000263608,ENSG00000137343,ENSG00000228022,ENSG00000224328	0.94	0.84	0.99	0.63	0.47	0.77	0.31	52.87	('79969@uc003rvf.2uc003rvg.2@uc003rdc.2uc003rdd.2.A.0', '79969@uc003rvf.2uc003rvg.2@uc003rdc.2uc003rdd.2.B.0')	(0,0):30809,(0,1):1,(1,0):33	0:33,1:1	(0,0):35782,(0,1):11,(1,0):20	0:20,1:11	6
ALE	54542@uc004bng.1@uc004bne.2	ENSG00000212447,ENSG00000056586	0.81	0.68	0.91	0.48	0.3	0.67	0.33	49.69	('54542@uc004bng.1@uc004bne.2.A.0', '54542@uc004bng.1@uc004bne.2.B.0')	(0,0):1252,(0,1):7,(1,0):44	0:44,1:7	(0,0):915,(0,1):14,(1,0):16	0:16,1:14	9
ALE	775@uc001qka.1@uc0092211.uc001qky.1	ENSG00000203648,ENSG00000151067	0.94	0.8	1	0.55	0.4	0.71	0.39	46.34	('775@uc001qka.1@uc0092215.uc001qky.1.B.0', '775@uc001qka.1@uc0092214.uc001qky.1.A.0')	(0,0):402,(1,0):32	1904-01-01 00:32:00	(0,0):291,(0,1):12,(1,0):36	0:36,1:12	12
ALE	1378@uc009xcj.1@uc001hfx.1uc001hfy.1	ENSG00000203710	0.66	0.53	0.79	0.35	0.25	0.47	0.31	42.66	('1378@uc009xcj.1@uc001hfx.1uc001hfy.1.B.0', '1378@uc009xcj.1@uc001hfx.1uc001hfy.1.A.0')	(0,0):5093,(0,1):11,(1,0):380	0:380,1:11	(0,0):3090,(0,1):19,(1,0):170	0:170,1:19	1
ALE	9677@uc001zsa.2@uc001zrv.1	ENSG00000168781	0.96	0.8	1	0.49	0.29	0.7	0.47	39.63	('9677@uc001zsa.2@uc001zrv.1.B.0', '9677@uc001zsa.2@uc001zrv.1.A.0')	(0,0):346,(1,0):210	0.145833	(0,0):261,(0,1):4,(1,0):72	0:72,1:4	15
ALE	23101@uc003flp.1@uc003flj.1	ENSG00000202502,ENSG00000053524	0.84	0.58	0.99	0.36	0.18	0.61	0.48	36.57	('23101@uc003flp.1@uc003flj.1.A.0_23101@uc003flp.1@uc003flj.1.A.1', '23101@uc003flp.1@uc003flj.1.B.0')	(0,0):2115,(1,0):72	0.05	(0,0):2818,(0,1):4,(1,0):34	0:34,1:4	3
ALE	9205@uc001umn.1uc001umo.1@uc001umm.1	ENSG00000132950	0.4	0.28	0.55	0.17	0.11	0.24	0.23	32.77	('9205@uc001umn.1uc001umo.1@uc001umm.1.B.0', '9205@uc001umn.1uc001umo.1@uc001umm.1.A.0')	(0,0):154,(0,1):11,(1,0):134	0:134,1:11	(0,0):107,(0,1):21,(1,0):76	0:76,1:21	13
ALE	57188@uc002bjy.1@uc010bmu.1	ENSG00000156218	0.22	0.07	0.44	0.67	0.47	0.85	-0.45	32.57	('57188@uc002bjy.1@uc010bmu.1.B.0', '57188@uc002bjy.1@uc010bmu.1.A.0')	(0,0):369,(0,1):8,(1,0):3	0:3,1:8	(0,0):1124,(0,1):5,(1,0):16	0:16,1:5	15
ALE	55010@uc001tji.2@uc001tje.2	ENSG00000185480	0.63	0.45	0.78	0.26	0.13	0.43	0.37	32.45	('55010@uc001tji.2@uc001tje.2.B.0', '55010@uc001tji.2@uc001tje.2.A.0')	(0,0):236,(0,1):10,(1,0):19	0:19,1:10	(0,0):168,(0,1):20,(1,0):7	0:7,1:20	12
ALE	92345@uc003iqj.1@uc010iqw.1	ENSG00000145414	0.28	0.18	0.42	0.69	0.45	0.88	-0.41	31.73	('92345@uc003iqj.1@uc010iqw.1.A.0', '92345@uc003iqj.1@uc010iqw.1.B.0')	(0,0):123,(0,1):19,(1,0):24	0:24,1:19	(0,0):69,(0,1):4,(1,0):32	0:32,1:4	4
ALE	219790@uc001jlx.2@uc001jlv.1uc001jlw.1	ENSG00000182010	0.33	0.25	0.42	0.64	0.48	0.8	-0.31	28.54	('219790@uc001jlx.2@uc001jlv.1uc001jlw.1.B.0', '219790@uc001jlx.2@uc001jlv.1uc001jlw.1.A.0')	(0,0):173,(0,1):40,(1,0):72	0:72,1:40	(0,0):152,(0,1):7,(1,0):49	0:49,1:7	10
ALE	155435@uc003wme.2@uc010lqj.1uc010lqk.1uc003wmg.2	ENSG00000184863	0.38	0.28	0.49	0.18	0.13	0.24	0.2	27.97	('155435@uc003wme.2@uc010lqj.1uc010lqk.1uc003wmg.2.B.0', '155435@uc003wme.2@uc010lqj.1uc010lqk.1uc003wmg.2.A.0')	(0,0):1569,(0,1):18,(1,0):687	0:687,1:18	(0,0):1308,(0,1):30,(1,0):399	0:399,1:30	7
ALE	90102@uc003dye.2@uc003dyd.1	ENSG00000144824	0	0	0.01	0.65	0.16	0.99	-0.65	27.57	('90102@uc003dye.2@uc003dyd.1.A.0', '90102@uc003dye.2@uc003dyd.1.B.0')	(0,0):881,(0,1):19,(1,0):2	0:2,1:19	(0,0):522,(1,0):4	1904-01-01 00:04:00	3
ALE	26249@uc003lbs.1@uc003lbr.2uc010jek.1	ENSG00000216009,ENSG00000146021	0.85	0.72	0.96	0.54	0.42	0.68	0.31	22.72	('26249@uc003lbs.1@uc003lbr.2uc010jek.1.B.0', '26249@uc003lbs.1@uc003lbr.2uc010jek.1.A.0')	(0,0):278,(0,1):3,(1,0):93	0:93,1:3	(0,0):381,(0,1):15,(1,0):76	0:76,1:15	5
ALE	140469@uc002uga.2@uc002ufy.1uc002ufz.1	ENSG00000071909	0.87	0.75	0.97	0.53	0.35	0.74	0.34	21.57	('140469@uc002uga.2@uc002ufy.1uc002ufz.1.B.0', '140469@uc002uga.2@uc002ufy.1uc002ufz.1.A.0')	(0,0):1046,(0,1):2,(1,0):60	0:60,1:2	(0,0):1470,(0,1):7,(1,0):23	0:23,1:7	2
ALE	6738@uc001gst.1uc001546.uc009wyq.1	ENSG00000116747	0.1	0.05	0.18	0.7	0.25	0.96	-0.6	21.42	('6738@uc001gst.1uc001549.uc009wyq.1.A.0', '6738@uc001gst.1uc001550.uc009wyq.1.B.0')	(0,0):2477,(0,1):8,(1,0):1178	0:1178,1:8	(0,0):1866,(1,0):1044	0.725	1
ALE	83259@uc004fqp.1@uc004fqo.1	ENSG00000214207,ENSG00000252059,ENSG00000099715	0.1	0.04	0.19	0.36	0.24	0.5	-0.26	20.01	('83259@uc004fqp.1@uc004fqo.1.B.0', '83259@uc004fqp.1@uc004fqo.1.A.0')	(0,0):4235,(0,1):36,(1,0):5	0:5,1:36	(0,0):6517,(0,1):25,(1,0):21	0:21,1:25	Y
ALE	80254@uc003eql.1uc003eqn.1uc003eqo.1@uc003eqm.1	ENSG00000182923	0.06	0.03	0.11	0.66	0.19	0.96	-0.6	19.39	('80254@uc003eql.1uc003eqn.1uc003eqo.1@uc003eqm.1.A.0', '80254@uc003eql.1uc003eqn.1uc003eqo.1@uc003eqm.1.B.0')	(0,0):76,(0,1):9,(1,0):99	0:99,1:9	(0,0):66,(1,0):97	0.0673611	3
ALE	84132@uc010kti.1@uc003sps.2	ENSG00000106346	0.57	0.45	0.68	0.31	0.2	0.41	0.26	17.9	('84132@uc010kti.1@uc003sps.2.A.0', '84132@uc010kti.1@uc003sps.2.B.1_84132@uc010kti.1@uc003sps.2.B.0')	(0,0):101,(0,1):23,(1,0):48	0:48,1:23	(0,0):93,(0,1):40,(1,0):27	0:27,1:40	7
ALE	10107@uc003rca.1@uc003rue.2	ENSG00000204613,ENSG00000233892,ENSG00000234127,ENSG00000242996,ENSG00000231074	0.86	0.71	0.96	0.47	0.29	0.66	0.39	16.74	('10107@uc003rca.1@uc003rue.2.B.0', '10107@uc003rca.1@uc003rue.2.A.0')	(0,0):7486,(0,1):2,(1,0):24	0:24,1:2	(0,0):4662,(0,1):11,(1,0):15	0:15,1:11	6
ALE	23309@uc002new.2@uc002nex.1	ENSG00000127511	0.33	0.25	0.44	0.56	0.47	0.66	-0.23	16.4	('23309@uc002new.2@uc002nex.1.A.0', '23309@uc002new.2@uc002nex.1.B.0')	(0,0):465,(0,1):27,(1,0):173	0:173,1:27	(0,0):528,(0,1):24,(1,0):401	0:401,1:24	19
ALE	9980@uc002yvh.2@uc002yvg.1	ENSG00000142197	0.05	0.01	0.11	0.27	0.12	0.46	-0.22	16.19	('9980@uc002yvh.2@uc002yvg.1.A.0', '9980@uc002yvh.2@uc002yvg.1.B.0')	(0,0):214,(0,1):46,(1,0):2	0:2,1:46	(0,0):213,(0,1):13,(1,0):6	0:6,1:13	21
ALE	6519@uc002rua.2@uc002rub.2	ENSG00000138079	0.24	0.09	0.47	0.73	0.47	0.95	-0.49	16.03	('6519@uc002rua.2@uc002rub.2.A.0', '6519@uc002rua.2@uc002rub.2.B.0')	(0,0):17,(0,1):7,(1,0):6	0:6,1:7	(0,0):24,(0,1):1,(1,0):14	0:14,1:1	2
ALE	653483@uc003qwa.2@uc003sid.2	ENSG00000260982,ENSG00000229796,ENSG00000261730,ENSG00000218027,ENSG00000266252,ENSG00000164385,ENSG00000266750,ENSG00000232999,ENSG00000233763,ENSG00000222248,ENSG00000137267,ENSG00000218472,ENSG00000260604,ENSG00000230648,ENSG00000237716,ENSG00000231811,ENSG00000260673,ENSG00000236336,ENSG00000220685,ENSG00000265083,ENSG00000264541,ENSG00000220446,ENSG00000218574,ENSG00000217239,ENSG00000216360…	0.84	0.66	0.96	0.48	0.32	0.65	0.36	15.63	('653483@uc003qwa.2@uc003sid.2.A.0_653483@uc003qwa.2@uc003sid.2.A.1', '653483@uc003qwa.2@uc003sid.2.B.0_653483@uc003qwa.2@uc003sid.2.B.1')	(0,0):3924677,(0,1):2,(1,0):17	0:17,1:2	(0,0):3056896,(0,1):15,(1,0):14	0:14,1:15	6
ALE	64097@uc003kpw.1@uc003kpp.1	ENSG00000129595	0.75	0.46	0.94	0.24	0.09	0.47	0.51	15.61	('64097@uc003kpw.1@uc003kpp.1.A.0', '64097@uc003kpw.1@uc003kpp.1.B.0')	(0,0):2784,(0,1):1,(1,0):6	0:6,1:1	(0,0):2606,(0,1):13,(1,0):4	0:4,1:13	5
ALE	58538@uc002uyn.2@uc002uyi.2uc010ftj.1uc002uyj.2uc002uyk.2uc010ftk.1	ENSG00000082126	0.26	0.03	0.71	0.8	0.47	0.99	-0.54	15.38	('58538@uc002uyn.2@uc002uyi.2uc010ftj.1uc002uyj.2uc002uyk.2uc010ftk.1.A.0', '58538@uc002uyn.2@uc002uyi.2uc010ftj.1uc002uyj.2uc002uyk.2uc010ftk.1.B.0')	(0,0):74,(0,1):3,(1,0):1	0:1,1:3	(0,0):198,(1,0):8	1904-01-01 00:08:00	2
ALE	2982@uc003iou.1@uc00823.uc003ipb.1	ENSG00000164116	0.72	0.57	0.85	0.43	0.33	0.55	0.29	14.85	('2982@uc003iou.1@uc00826.uc003ipb.1.A.0', '2982@uc003iou.1@uc00827.uc003ipb.1.B.0')	(0,0):134,(0,1):7,(1,0):36	0:36,1:7	(0,0):242,(0,1):36,(1,0):54	0:54,1:36	4
ALE	64799@uc002aqn.1@uc002aqp.1	ENSG00000103599	0.71	0.45	0.95	0.3	0.11	0.54	0.41	14.63	('64799@uc002aqn.1@uc002aqp.1.B.1_64799@uc002aqn.1@uc002aqp.1.B.0', '64799@uc002aqn.1@uc002aqp.1.A.0')	(0,0):508,(0,1):2,(1,0):12	0:12,1:2	(0,0):763,(0,1):7,(1,0):5	0:5,1:7	15
ALE	1540@uc002egn.1@uc002egs.1	ENSG00000083799	0.01	0	0.06	0.52	0.14	0.87	-0.51	14.06	('1540@uc002egn.1@uc002egs.1.B.0', '1540@uc002egn.1@uc002egs.1.A.0')	(0,0):721,(0,1):5,(1,0):23	0:23,1:5	(0,0):528,(1,0):21	1904-01-01 00:21:00	16
ALE	3993@uc002jog.1uc010dgf.1@uc002joh.1uc002joi.1uc002joj.1	ENSG00000073350	0.14	0.08	0.22	0.42	0.24	0.62	-0.28	13.27	('3993@uc002jog.1uc010dgf.1@uc002joh.1uc002joi.1uc002joj.1.A.0', '3993@uc002jog.1uc010dgf.1@uc002joh.1uc002joi.1uc002joj.1.B.0')	(0,0):558,(0,1):65,(1,0):13	0:13,1:65	(0,0):241,(0,1):15,(1,0):13	0:13,1:15	17
ALE	3113@uc010koc.1@uc003sgl.1	ENSG00000234515,ENSG00000212066,ENSG00000242574,ENSG00000263756,ENSG00000204252,ENSG00000248993,ENSG00000204257,ENSG00000231389	0.74	0.28	0.98	0.05	0	0.18	0.69	12.57	('3113@uc010koc.1@uc003sgl.1.B.0_3113@uc010koc.1@uc003sgl.1.B.1', '3113@uc010koc.1@uc003sgl.1.A.0')	(0,0):8180,(1,0):3	1904-01-01 00:03:00	(0,0):6219,(0,1):8	0:0,1:8	6
ALE	11064@uc004bkz.1@uc004bkx.1uc004blb.1uc010mvp.1	ENSG00000119397	0.26	0.18	0.34	0.64	0.37	0.89	-0.38	12.41	('11064@uc004bkz.1@uc004bkx.1uc004blb.1uc010mvp.1.B.0', '11064@uc004bkz.1@uc004bkx.1uc004blb.1uc010mvp.1.A.0')	(0,0):2472,(0,1):26,(1,0):56	0:56,1:26	(0,0):829,(0,1):2,(1,0):23	0:23,1:2	9
ALE	285025@uc002ung.2@uc002unf.1	ENSG00000163492	0.12	0.06	0.2	0.38	0.22	0.58	-0.26	12.38	('285025@uc002ung.2@uc002unf.1.A.0', '285025@uc002ung.2@uc002unf.1.B.0')	(0,0):175,(0,1):34,(1,0):13	0:13,1:34	(0,0):131,(0,1):10,(1,0):17	0:17,1:10	2
ALE	64799@uc002aqn.1@uc002aqo.1uc002aqq.1	ENSG00000103599	0.73	0.49	0.93	0.28	0.1	0.51	0.45	12.38	('64799@uc002aqn.1@uc002aqo.1uc002aqq.1.B.0', '64799@uc002aqn.1@uc002aqo.1uc002aqq.1.A.0')	(0,0):509,(0,1):2,(1,0):11	0:11,1:2	(0,0):764,(0,1):7,(1,0):4	0:4,1:7	15
ALE	57188@uc002bjy.1@uc002bjz.2	ENSG00000156218	0.23	0.07	0.45	0.61	0.39	0.86	-0.38	11.49	('57188@uc002bjy.1@uc002bjz.2.B.0', '57188@uc002bjy.1@uc002bjz.2.A.0')	(0,0):368,(0,1):8,(1,0):4	0:4,1:8	(0,0):1124,(0,1):5,(1,0):18	0:18,1:5	15
ALE	116496@uc009wyh.1@uc001gra.1	ENSG00000135842	0.89	0.83	0.95	0.67	0.53	0.8	0.22	11.48	('116496@uc009wyh.1@uc001gra.1.B.0', '116496@uc009wyh.1@uc001gra.1.A.0')	(0,0):645,(0,1):10,(1,0):3841	0:3841,1:10	(0,0):145,(0,1):9,(1,0):738	0:738,1:9	1
ALE	252983@uc010dcc.1@uc002iuf.1uc010dcd.1	ENSG00000166263	0.71	0.59	0.84	0.46	0.35	0.57	0.25	11.45	('252983@uc010dcc.1@uc002iuf.1uc010dcd.1.B.0', '252983@uc010dcc.1@uc002iuf.1uc010dcd.1.A.0')	(0,0):805,(0,1):11,(1,0):138	0:138,1:11	(0,0):933,(0,1):23,(1,0):92	0:92,1:23	17
ALE	9720@uc002gql.1@uc002gqk.1	ENSG00000266302,ENSG00000170160	0.08	0.02	0.22	0.42	0.22	0.64	-0.34	11.31	('9720@uc002gql.1@uc002gqk.1.A.0', '9720@uc002gql.1@uc002gqk.1.B.0')	(0,0):22,(0,1):17,(1,0):2	0:2,1:17	(0,0):42,(0,1):9,(1,0):12	0:12,1:9	17
ALE	727@uc010mvm.1@uc004bkv.1	ENSG00000106804	0.64	0.37	0.86	0.95	0.8	0.99	-0.31	11.22	('727@uc010mvm.1@uc004bkv.1.B.0', '727@uc010mvm.1@uc004bkv.1.A.0')	(0,0):186,(0,1):2,(1,0):11	0:11,1:2	(0,0):664,(1,0):44	1904-01-01 00:44:00	9
ALE	23101@uc003flj.1@uc003fli.1	ENSG00000053524	0.66	0.26	0.97	0.17	0.05	0.41	0.49	11.08	('23101@uc003flj.1@uc003fli.1.B.0', '23101@uc003flj.1@uc003fli.1.A.0')	(0,0):98,(1,0):5	1904-01-01 00:05:00	(0,0):232,(0,1):4,(1,0):8	0:8,1:4	3
ALE	7942@uc003oqy.1@uc003oqr.1uc003oqs.1uc003oqt.1uc003oqu.1	ENSG00000112561	0.13	0.05	0.25	0.66	0.25	0.91	-0.53	10.82	('7942@uc003oqy.1@uc003oqr.1uc003oqs.1uc003oqt.1uc003oqu.1.B.0', '7942@uc003oqy.1@uc003oqr.1uc003oqs.1uc003oqt.1uc003oqu.1.A.0')	(0,0):44,(0,1):6,(1,0):25	0:25,1:6	(0,0):41,(1,0):11	1904-01-01 00:11:00	6
ALE	22997@uc001qgy.1@uc001qgx.2	ENSG00000080854	0.05	0	0.34	0.48	0.18	0.86	-0.43	10.31	('22997@uc001qgy.1@uc001qgx.2.B.0_22997@uc001qgy.1@uc001qgx.2.B.1', '22997@uc001qgy.1@uc001qgx.2.A.0')	(0,0):40,(0,1):3,(1,0):16	0:16,1:3	(0,0):37,(1,0):15	1904-01-01 00:15:00	11
ALE	55761@uc001mxh.2uc001mxj.2@uc001mxi.1uc001mxk.1uc001mxl.1uc001mxm.1	ENSG00000254463,ENSG00000052841	0.1	0.07	0.13	0.32	0.17	0.54	-0.22	10.14	('55761@uc001mxh.2uc001mxj.2@uc001mxi.1uc001mxk.1uc001mxl.1uc001mxm.1.A.0', '55761@uc001mxh.2uc001mxj.2@uc001mxi.1uc001mxk.1uc001mxl.1uc001mxm.1.B.0')	(0,0):2231,(0,1):36,(1,0):156	0:156,1:36	(0,0):1423,(0,1):5,(1,0):93	0:93,1:5	11
ALE	642987@uc010jbs.1uc003koy.2@uc003kow.1	ENSG00000186952	0.09	0.03	0.2	0.54	0.23	0.88	-0.45	10.11	('642987@uc010jbs.1uc003koy.2@uc003kow.1.B.0', '642987@uc010jbs.1uc003koy.2@uc003kow.1.A.0_642987@uc010jbs.1uc003koy.2@uc003kow.1.A.1')	(0,0):196,(0,1):10,(1,0):5	0:5,1:10	(0,0):716,(0,1):2,(1,0):15	0:15,1:2	5
ALE	4207@uc002nlq.1@uc002nll.1uc002nlm.1uc002nln.1uc002nlo.1uc002nlp.1	ENSG00000254901,ENSG00000213999,ENSG00000064489	0.37	0.24	0.52	0.66	0.51	0.8	-0.29	9.93	('4207@uc002nlq.1@uc002nll.1uc002nlm.1uc002nln.1uc002nlo.1uc002nlp.1.A.0_4207@uc002nlq.1@uc002nll.1uc002nlm.1uc002nln.1uc002nlo.1uc002nlp.1.A.1', '4207@uc002nlq.1@uc002nll.1uc002nlm.1uc002nln.1uc002nlo.1uc002nlp.1.B.0')	(0,0):357,(0,1):19,(1,0):23	0:23,1:19	(0,0):404,(0,1):11,(1,0):45	0:45,1:11	19
ALE	3993@uc002jog.1uc010dgf.1@uc010dgg.1	ENSG00000073350	0.15	0.09	0.23	0.42	0.26	0.59	-0.27	9.83	('3993@uc002jog.1uc010dgf.1@uc010dgg.1.A.0', '3993@uc002jog.1uc010dgf.1@uc010dgg.1.B.0')	(0,0):566,(0,1):57,(1,0):13	0:13,1:57	(0,0):242,(0,1):14,(1,0):13	0:13,1:14	17
ALE	91526@uc002uud.1@uc002uuc.2	ENSG00000065413	0.04	0.02	0.09	0.63	0.16	0.99	-0.59	9.72	('91526@uc002uud.1@uc002uuc.2.A.0', '91526@uc002uud.1@uc002uuc.2.B.0')	(0,0):399,(0,1):11,(1,0):25	0:25,1:11	(0,0):248,(1,0):11	1904-01-01 00:11:00	2
ALE	10107@uc003rca.1@uc003rud.1	ENSG00000204613,ENSG00000233892,ENSG00000234127,ENSG00000242996,ENSG00000231074	0.87	0.68	0.98	0.5	0.32	0.7	0.37	9.65	('10107@uc003rca.1@uc003rud.1.B.0', '10107@uc003rca.1@uc003rud.1.A.0')	(0,0):7490,(0,1):2,(1,0):20	0:20,1:2	(0,0):4665,(0,1):11,(1,0):12	0:12,1:11	6
ALE	4629@uc002deb.2@uc010bvh.1	ENSG00000133392	0.86	0.68	0.96	0.49	0.24	0.71	0.37	8.82	('4629@uc002deb.2@uc010bvh.1.B.0', '4629@uc002deb.2@uc010bvh.1.A.0')	(0,0):430,(0,1):2,(1,0):23	0:23,1:2	(0,0):560,(0,1):7,(1,0):9	0:9,1:7	16
ALE	58538@uc002uyn.2@uc002uym.1	ENSG00000082126	0.6	0.24	0.91	0.12	0.02	0.31	0.48	8.61	('58538@uc002uyn.2@uc002uym.1.B.0', '58538@uc002uyn.2@uc002uym.1.A.0')	(0,0):24,(0,1):1,(1,0):3	0:3,1:1	(0,0):95,(0,1):8	0:0,1:8	2
ALE	10307@uc010jfr.1@uc01947.uc010jfo.1	ENSG00000113108,ENSG00000213523	0.4	0.3	0.52	0.7	0.51	0.83	-0.3	8.53	('10307@uc010jfr.1@uc01951.uc010jfo.1.B.0', '10307@uc010jfr.1@uc01950.uc010jfo.1.A.0')	(0,0):389,(0,1):31,(1,0):55	0:55,1:31	(0,0):263,(0,1):5,(1,0):34	0:34,1:5	5
ALE	7942@uc003oqy.1@uc003oqv.1	ENSG00000112561	0.05	0.01	0.16	0.6	0.19	0.94	-0.55	8.52	('7942@uc003oqy.1@uc003oqv.1.B.0', '7942@uc003oqy.1@uc003oqv.1.A.0')	(0,0):32,(0,1):6,(1,0):2	0:2,1:6	(0,0):29,(1,0):2	1904-01-01 00:02:00	6
ALE	3111@uc003ocr.1@uc003roz.1	ENSG00000260673,ENSG00000236336,ENSG00000220685,ENSG00000265083,ENSG00000264541,ENSG00000220446,ENSG00000218574,ENSG00000217239,ENSG00000216360,ENSG00000230770,ENSG00000239472,ENSG00000124785,ENSG00000241216,ENSG00000261211,ENSG00000224532,ENSG00000219986,ENSG00000240936,ENSG00000251762,ENSG00000201483,ENSG00000220472,ENSG00000219375,ENSG00000230570,ENSG00000233503,ENSG00000234115,ENSG00000261189…	0.22	0.11	0.36	0.5	0.33	0.64	-0.28	8.49	('3111@uc003ocr.1@uc003roz.1.A.0', '3111@uc003ocr.1@uc003roz.1.B.0')	(0,0):784623,(0,1):21,(1,0):5	0:5,1:21	(0,0):563528,(0,1):18,(1,0):18	0:18,1:18	6
ALE	55633@uc003ono.1@uc003onn.1uc003onp.1	ENSG00000065491	0.78	0.58	0.95	0.37	0.2	0.59	0.41	8.43	('55633@uc003ono.1@uc003onn.1uc003onp.1.B.0', '55633@uc003ono.1@uc003onn.1uc003onp.1.A.0')	(0,0):58,(0,1):2,(1,0):294	0:294,1:2	(0,0):54,(0,1):6,(1,0):99	0:99,1:6	6
ALE	152815@uc010iis.1@uc010iit.1	ENSG00000174796	0.29	0.18	0.42	0.64	0.42	0.82	-0.35	8.38	('152815@uc010iis.1@uc010iit.1.A.0', '152815@uc010iis.1@uc010iit.1.B.1_152815@uc010iis.1@uc010iit.1.B.0')	(0,0):514,(0,1):32,(1,0):16	0:16,1:32	(0,0):318,(0,1):7,(1,0):16	0:16,1:7	4
ALE	348094@uc002any.2uc002anz.2uc002aob.2@uc002aoa.1uc010bha.1	ENSG00000166839	0.67	0.55	0.79	0.38	0.24	0.52	0.29	8.35	('348094@uc002any.2uc002anz.2uc002aob.2@uc002aoa.1uc010bha.1.B.0', '348094@uc002any.2uc002anz.2uc002aob.2@uc002aoa.1uc010bha.1.A.0')	(0,0):174,(0,1):15,(1,0):56	0:56,1:15	(0,0):196,(0,1):18,(1,0):19	0:19,1:18	15
ALE	9512@uc010liu.1@uc003vbl.1uc003vbm.1uc010liv.1uc010liw.1	ENSG00000105819	0.18	0.13	0.25	0.43	0.26	0.64	-0.25	8.33	('9512@uc010liu.1@uc003vbl.1uc003vbm.1uc010liv.1uc010liw.1.B.0', '9512@uc010liu.1@uc003vbl.1uc003vbm.1uc010liv.1uc010liw.1.A.0')	(0,0):832,(0,1):27,(1,0):267	0:267,1:27	(0,0):461,(0,1):6,(1,0):198	0:198,1:6	7
ALE	952@uc003goj.1@uc003gol.1	ENSG00000004468	0.1	0.03	0.23	0.51	0.24	0.79	-0.41	8.29	('952@uc003goj.1@uc003gol.1.A.0', '952@uc003goj.1@uc003gol.1.B.0')	(0,0):57,(0,1):8,(1,0):3	0:3,1:8	(0,0):112,(0,1):3,(1,0):10	0:10,1:3	4
ALE	57787@uc002paz.1@uc002pbc.1	ENSG00000007047	0.04	0.02	0.08	0.28	0.11	0.56	-0.24	8.16	('57787@uc002paz.1@uc002pbc.1.B.0', '57787@uc002paz.1@uc002pbc.1.A.1_57787@uc002paz.1@uc002pbc.1.A.0')	(0,0):86,(0,1):17,(1,0):16	0:16,1:17	(0,0):70,(0,1):4,(1,0):27	0:27,1:4	19
ALE	5890@uc001xkd.1uc010aqr.1@uc001xke.1	ENSG00000182185	0.67	0.4	0.87	0.26	0.12	0.44	0.41	8.16	('5890@uc001xkd.1uc010aqr.1@uc001xke.1.B.0', '5890@uc001xkd.1uc010aqr.1@uc001xke.1.A.0')	(0,0):116,(0,1):3,(1,0):21	0:21,1:3	(0,0):129,(0,1):8,(1,0):8	0:8,1:8	14
ALE	79969@uc003rvh.2uc003rvi.2@uc003rde.2uc003rdf.2	ENSG00000266183,ENSG00000204564,ENSG00000196230,ENSG00000263608,ENSG00000137343,ENSG00000228022,ENSG00000224328	0.91	0.77	0.99	0.61	0.4	0.8	0.3	8.07	('79969@uc003rvh.2uc003rvi.2@uc003rde.2uc003rdf.2.A.0', '79969@uc003rvh.2uc003rvi.2@uc003rde.2uc003rdf.2.B.0')	(0,0):30811,(1,0):18	1904-01-01 00:18:00	(0,0):35785,(0,1):7,(1,0):12	0:12,1:7	6
ALE	83259@uc004fql.1uc004fqm.1uc004fqn.1@uc004fqo.1	ENSG00000214207,ENSG00000252059,ENSG00000099715	0.11	0.04	0.23	0.4	0.23	0.62	-0.29	7.92	('83259@uc004fql.1uc004fqm.1uc004fqn.1@uc004fqo.1.B.0', '83259@uc004fql.1uc004fqm.1uc004fqn.1@uc004fqo.1.A.0')	(0,0):4210,(0,1):10,(1,0):5	0:5,1:10	(0,0):6491,(0,1):6,(1,0):21	0:21,1:6	Y
ALE	90102@uc003dyf.2@uc003dyd.1	ENSG00000144824	0.01	0.01	0.02	0.44	0.11	0.8	-0.43	7.87	('90102@uc003dyf.2@uc003dyd.1.A.0', '90102@uc003dyf.2@uc003dyd.1.B.0')	(0,0):776,(0,1):19,(1,0):53	0:53,1:19	(0,0):361,(1,0):35	1904-01-01 00:35:00	3
ALE	9204@uc001byi.2uc001byj.2uc001byk.2@uc009vup.1	ENSG00000163867	0.23	0.16	0.32	0.52	0.33	0.75	-0.29	7.82	('9204@uc001byi.2uc001byj.2uc001byk.2@uc009vup.1.A.0', '9204@uc001byi.2uc001byj.2uc001byk.2@uc009vup.1.B.0')	(0,0):1232,(0,1):23,(1,0):235	0:235,1:23	(0,0):957,(0,1):6,(1,0):200	0:200,1:6	1
ALE	80315@uc010jju.1@uc003mcs.2uc010jjv.1uc003mct.2uc003mcu.2	ENSG00000113742	0.28	0.21	0.37	0.5	0.39	0.61	-0.22	7.63	('80315@uc010jju.1@uc003mcs.2uc010jjv.1uc003mct.2uc003mcu.2.B.0', '80315@uc010jju.1@uc003mcs.2uc010jjv.1uc003mct.2uc003mcu.2.A.0')	(0,0):117,(0,1):26,(1,0):628	0:628,1:26	(0,0):208,(0,1):16,(1,0):981	0:981,1:16	5
ALE	135112@uc003qaj.2@uc003qaf.2	ENSG00000222445,ENSG00000111912,ENSG00000260527	0.19	0.13	0.28	0.47	0.29	0.66	-0.28	7.58	('135112@uc003qaj.2@uc003qaf.2.B.0', '135112@uc003qaj.2@uc003qaf.2.A.0')	(0,0):525,(0,1):45,(1,0):22	0:22,1:45	(0,0):246,(0,1):8,(1,0):15	0:15,1:8	6
ALE	10458@uc002jyz.2@uc002jzg.1	ENSG00000175866	0.15	0.05	0.27	0.47	0.28	0.69	-0.32	7.52	('10458@uc002jyz.2@uc002jzg.1.B.0', '10458@uc002jyz.2@uc002jzg.1.A.0')	(0,0):176,(0,1):20,(1,0):5	0:5,1:20	(0,0):178,(0,1):7,(1,0):9	0:9,1:7	17
ALE	8558@uc002foa.2@uc002fob.2	ENSG00000185324	0.87	0.74	0.96	0.59	0.44	0.74	0.28	7.52	('8558@uc002foa.2@uc002fob.2.B.0', '8558@uc002foa.2@uc002fob.2.A.0')	(0,0):492,(0,1):3,(1,0):67	0:67,1:3	(0,0):351,(0,1):11,(1,0):45	0:45,1:11	16
ALE	9732@uc010ljt.1@uc003vga.1	ENSG00000128512	0.77	0.41	0.96	0.18	0.01	0.51	0.59	7.19	('9732@uc010ljt.1@uc003vga.1.B.0', '9732@uc010ljt.1@uc003vga.1.A.0')	(0,0):166,(1,0):6	1904-01-01 00:06:00	(0,0):272,(0,1):2	0:0,1:2	7
ALE	4671@uc003kaq.2uc003051.uc003mpr.1	ENSG00000214278,ENSG00000188242,ENSG00000264233,ENSG00000249908,ENSG00000215246,ENSG00000263834,ENSG00000249201,ENSG00000263670,ENSG00000248951,ENSG00000251532,ENSG00000263746,ENSG00000171421,ENSG00000250417,ENSG00000259757,ENSG00000249541,ENSG00000250716,ENSG00000259603,ENSG00000248962,ENSG00000249994,ENSG00000251506,ENSG00000251426,ENSG00000250529,ENSG00000250579,ENSG00000251568,ENSG00000250808…	0.96	0.84	1	0.72	0.58	0.86	0.24	7.03	('4671@uc003kaq.2uc003054.uc003mpr.1.A.0', '4671@uc003kaq.2uc003055.uc003mpr.1.B.0')	(0,0):646744,(1,0):28	1904-01-01 00:28:00	(0,0):700696,(0,1):8,(1,0):23	0:23,1:8	5
ALE	9898@uc001fen.1@uc009wot.1	ENSG00000201129,ENSG00000252817,ENSG00000143569	0.66	0.28	0.94	0.16	0.05	0.4	0.5	6.95	('9898@uc001fen.1@uc009wot.1.B.0', '9898@uc001fen.1@uc009wot.1.A.0')	(0,0):2983,(1,0):111	0.0770833	(0,0):3661,(0,1):4,(1,0):192	0:192,1:4	1
ALE	27328@uc004efj.1@uc004efk.1uc004efl.1uc004efn.1uc004efo.1uc004efm.1	ENSG00000211526,ENSG00000215089,ENSG00000102290	0.16	0.06	0.32	0.5	0.29	0.72	-0.34	6.88	('27328@uc004efj.1@uc004efk.1uc004efl.1uc004efn.1uc004efo.1uc004efm.1.B.0', '27328@uc004efj.1@uc004efk.1uc004efl.1uc004efn.1uc004efo.1uc004efm.1.A.0')	(0,0):8539,(0,1):14,(1,0):3	0:3,1:14	(0,0):9351,(0,1):6,(1,0):10	0:10,1:6	X
ALE	1756@uc004ddd.1@uc0082.uc004ddb.1	ENSG00000198947	0.07	0.01	0.4	0.6	0.2	0.97	-0.53	6.8	('1756@uc004ddd.1@uc0086.uc004ddb.1.B.0', '1756@uc004ddd.1@uc0085.uc004ddb.1.A.0')	(0,0):2642,(0,1):3,(1,0):307	0:307,1:3	(0,0):2604,(1,0):158	0.109722	X
ALE	90102@uc003dyd.1@uc0337.uc003dyj.1	ENSG00000144824	0.14	0.09	0.2	0.65	0.24	0.97	-0.51	6.57	('90102@uc003dyd.1@uc0341.uc003dyj.1.B.0', '90102@uc003dyd.1@uc0340.uc003dyj.1.A.0')	(0,0):106,(0,1):19,(1,0):286	0:286,1:19	(0,0):37,(1,0):73	0.0506944	3
ALE	22854@uc001dvd.1@uc001dvh.2uc001dvf.2uc001dvc.2uc001dvi.1uc009wem.1	ENSG00000162631	0.76	0.68	0.84	0.44	0.25	0.67	0.32	6.45	('22854@uc001dvd.1@uc001dvh.2uc001dvf.2uc001dvc.2uc001dvi.1uc009wem.1.A.0', '22854@uc001dvd.1@uc001dvh.2uc001dvf.2uc001dvc.2uc001dvi.1uc009wem.1.B.0')	(0,0):740,(0,1):22,(1,0):206	0:206,1:22	(0,0):490,(0,1):8,(1,0):17	0:17,1:8	1
ALE	23125@uc010ckv.1@uc010cku.1uc002gag.1uc002gah.1uc002gai.1	ENSG00000108509	0.45	0.3	0.67	0.84	0.58	0.98	-0.39	6.42	('23125@uc010ckv.1@uc010cku.1uc002gag.1uc002gah.1uc002gai.1.B.0', '23125@uc010ckv.1@uc010cku.1uc002gag.1uc002gah.1uc002gai.1.A.0')	(0,0):133,(0,1):8,(1,0):85	0:85,1:8	(0,0):46,(1,0):44	1904-01-01 00:44:00	17
ALE	10290@uc010fwh.1uc002vlq.2@uc010fwg.1	ENSG00000072195	0.29	0.1	0.61	0.8	0.39	0.98	-0.51	6.34	('10290@uc010fwh.1uc002vlq.2@uc010fwg.1.B.0', '10290@uc010fwh.1uc002vlq.2@uc010fwg.1.A.0')	(0,0):38,(0,1):4,(1,0):2	0:2,1:4	(0,0):104,(1,0):4	1904-01-01 00:04:00	2
ALE	4207@uc002nlq.1@uc002nlk.1	ENSG00000254901,ENSG00000213999,ENSG00000064489	0.39	0.26	0.53	0.17	0.1	0.26	0.22	6.26	('4207@uc002nlq.1@uc002nlk.1.B.0', '4207@uc002nlq.1@uc002nlk.1.A.0_4207@uc002nlq.1@uc002nlk.1.A.1')	(0,0):352,(0,1):23,(1,0):24	0:24,1:23	(0,0):400,(0,1):45,(1,0):15	0:15,1:45	19
ALE	10587@uc002zqs.2uc010grv.1@uc002zqq.1uc002zqr.1	ENSG00000184470	0.64	0.53	0.76	0.42	0.31	0.54	0.22	5.99	('10587@uc002zqs.2uc010grv.1@uc002zqq.1uc002zqr.1.B.0', '10587@uc002zqs.2uc010grv.1@uc002zqq.1uc002zqr.1.A.0')	(0,0):348,(0,1):19,(1,0):81	0:81,1:19	(0,0):247,(0,1):24,(1,0):39	0:39,1:24	22
ALE	322@uc009yey.1uc0092831.uc001mdc.1	ENSG00000166313	0.04	0.01	0.14	0.59	0.15	0.93	-0.55	5.98	('322@uc009yey.1uc0092835.uc001mdc.1.B.0', '322@uc009yey.1uc0092834.uc001mdc.1.A.0')	(0,0):53,(0,1):4,(1,0):17	0:17,1:4	(0,0):56,(1,0):5	1904-01-01 00:05:00	11
ALE	91526@uc002uuc.2@uc002uua.1	ENSG00000224442,ENSG00000065413	0.09	0.04	0.17	0.62	0.18	0.98	-0.53	5.88	('91526@uc002uuc.2@uc002uua.1.B.0', '91526@uc002uuc.2@uc002uua.1.A.0')	(0,0):1211,(0,1):11,(1,0):13	0:13,1:11	(0,0):727,(1,0):7	1904-01-01 00:07:00	2
ALE	23181@uc002zjn.1@uc002zjr.2	ENSG00000160305	0.58	0.29	0.87	0.16	0.06	0.33	0.42	5.87	('23181@uc002zjn.1@uc002zjr.2.B.0', '23181@uc002zjn.1@uc002zjr.2.A.0')	(0,0):451,(0,1):2,(1,0):21	0:21,1:2	(0,0):327,(0,1):6,(1,0):8	0:8,1:6	21
ALE	11107@uc010inf.1@uc010ine.1	ENSG00000138738	0.38	0.28	0.5	0.62	0.5	0.74	-0.24	5.86	('11107@uc010inf.1@uc010ine.1.B.0_11107@uc010inf.1@uc010ine.1.B.1', '11107@uc010inf.1@uc010ine.1.A.0')	(0,0):1536,(0,1):36,(1,0):33	0:33,1:36	(0,0):1822,(0,1):17,(1,0):42	0:42,1:17	4
ALE	8558@uc002foa.2@uc010cip.1	ENSG00000185324	0.92	0.83	0.98	0.72	0.61	0.82	0.2	5.77	('8558@uc002foa.2@uc010cip.1.B.0', '8558@uc002foa.2@uc010cip.1.A.0')	(0,0):197,(0,1):3,(1,0):256	0:256,1:3	(0,0):144,(0,1):11,(1,0):175	0:175,1:11	16
ALE	843@uc002uxj.1uc002uxk.1uc010fta.1@uc002uxl.1uc002uxm.1	ENSG00000003400	0.96	0.89	1	0.75	0.62	0.88	0.21	5.72	('843@uc002uxj.1uc002uxk.1uc010fta.1@uc002uxl.1uc002uxm.1.A.0', '843@uc002uxj.1uc002uxk.1uc010fta.1@uc002uxl.1uc002uxm.1.B.0')	(0,0):90,(1,0):782	0.543056	(0,0):102,(0,1):6,(1,0):586	0:586,1:6	2
ALE	10170@uc002uer.1@uc002uep.1uc002ueq.1	ENSG00000073737	0.3	0.02	0.74	0.85	0.57	0.99	-0.55	5.7	('10170@uc002uer.1@uc002uep.1uc002ueq.1.B.0', '10170@uc002uer.1@uc002uep.1uc002ueq.1.A.0')	(0,0):21,(0,1):2,(1,0):1	0:1,1:2	(0,0):76,(1,0):15	1904-01-01 00:15:00	2
ALE	79637@uc002jmv.1@uc002jmw.1	ENSG00000125449	0.83	0.71	0.92	0.59	0.45	0.74	0.24	5.64	('79637@uc002jmv.1@uc002jmw.1.B.0', '79637@uc002jmv.1@uc002jmw.1.A.0')	(0,0):141,(0,1):5,(1,0):112	0:112,1:5	(0,0):149,(0,1):14,(1,0):81	0:81,1:14	17
ALE	54542@uc004bne.2@uc010mwc.1	ENSG00000056586	0.8	0.66	0.9	0.54	0.38	0.68	0.26	5.62	('54542@uc004bne.2@uc010mwc.1.B.0', '54542@uc004bne.2@uc010mwc.1.A.0')	(0,0):139,(0,1):7,(1,0):36	0:36,1:7	(0,0):127,(0,1):14,(1,0):21	0:21,1:14	9
ALE	23181@uc002zjl.1@uc002zjn.1	ENSG00000160305	0.8	0.62	0.94	0.44	0.23	0.65	0.36	5.57	('23181@uc002zjl.1@uc002zjn.1.A.0', '23181@uc002zjl.1@uc002zjn.1.B.0')	(0,0):206,(0,1):2,(1,0):23	0:23,1:2	(0,0):128,(0,1):6,(1,0):8	0:8,1:6	21
ALE	3800@uc002twt.2@uc002twr.1uc002twu.1	ENSG00000168280	0.71	0.56	0.83	0.41	0.26	0.59	0.3	5.55	('3800@uc002twt.2@uc002twr.1uc002twu.1.B.1_3800@uc002twt.2@uc002twr.1uc002twu.1.B.0', '3800@uc002twt.2@uc002twr.1uc002twu.1.A.0')	(0,0):80,(0,1):7,(1,0):51	0:51,1:7	(0,0):129,(0,1):11,(1,0):21	0:21,1:11	2
ALE	124045@uc002fnx.2@uc002fnw.1	ENSG00000167523	0.59	0.47	0.71	0.38	0.29	0.47	0.21	5.52	('124045@uc002fnx.2@uc002fnw.1.A.0', '124045@uc002fnx.2@uc002fnw.1.B.0')	(0,0):51,(0,1):19,(1,0):51	0:51,1:19	(0,0):81,(0,1):47,(1,0):50	0:50,1:47	16
ALE	5529@uc001xgg.2@uc001xge.1	ENSG00000154001	0.17	0	0.75	0.65	0.24	0.98	-0.48	5.52	('5529@uc001xgg.2@uc001xge.1.A.0', '5529@uc001xgg.2@uc001xge.1.B.0')	(0,0):675,(0,1):1,(1,0):27	0:27,1:1	(0,0):577,(1,0):20	1904-01-01 00:20:00	14
ALE	7145@uc002vgu.2@uc010fvi.1uc010fvj.1uc010fvk.1	ENSG00000079308	0.75	0.4	0.99	0.29	0.14	0.5	0.46	5.45	('7145@uc002vgu.2@uc010fvi.1uc010fvj.1uc010fvk.1.B.0', '7145@uc002vgu.2@uc010fvi.1uc010fvj.1uc010fvk.1.A.0')	(0,0):26,(1,0):10	1904-01-01 00:10:00	(0,0):48,(0,1):6,(1,0):16	0:16,1:6	2
ALE	728689@uc010byi.1uc1725.uc010byc.1	ENSG00000197272,ENSG00000176046,ENSG00000238684,ENSG00000259982,ENSG00000205609,ENSG00000233232,ENSG00000261832,ENSG00000188603,ENSG00000196502,ENSG00000197165,ENSG00000261419	0.6	0.4	0.78	0.24	0.07	0.48	0.36	5.41	('728689@uc010byi.1uc1729.uc010byc.1.B.0', '728689@uc010byi.1uc1728.uc010byc.1.A.0')	(0,0):8156,(0,1):7,(1,0):11	0:11,1:7	(0,0):5634,(0,1):12,(1,0):3	0:3,1:12	16
ALE	23506@uc003oso.1@uc003osm.1	ENSG00000112624	0.92	0.83	0.98	0.7	0.54	0.85	0.22	5.39	('23506@uc003oso.1@uc003osm.1.A.0', '23506@uc003oso.1@uc003osm.1.B.0')	(0,0):111,(0,1):3,(1,0):254	0:254,1:3	(0,0):109,(0,1):6,(1,0):92	0:92,1:6	6
ALE	80022@uc002joq.2@uc010dgj.1	ENSG00000266714,ENSG00000188126	0.26	0.12	0.42	0.64	0.36	0.88	-0.38	5.38	('80022@uc002joq.2@uc010dgj.1.A.1_80022@uc002joq.2@uc010dgj.1.A.0', '80022@uc002joq.2@uc010dgj.1.B.0')	(0,0):181,(0,1):9,(1,0):14	0:14,1:9	(0,0):72,(0,1):2,(1,0):20	0:20,1:2	17
ALE	11107@uc010inf.1@uc003idn.1uc003ido.1	ENSG00000138738	0.56	0.44	0.68	0.32	0.2	0.45	0.24	5.29	('11107@uc010inf.1@uc003idn.1uc003ido.1.A.0', '11107@uc010inf.1@uc003idn.1uc003ido.1.B.0')	(0,0):1543,(0,1):26,(1,0):36	0:36,1:26	(0,0):1829,(0,1):35,(1,0):17	0:17,1:35	4
ALE	53944@uc002anj.2@uc002anf.1	ENSG00000259316,ENSG00000169118	0.48	0.28	0.72	0.82	0.52	0.99	-0.34	5.26	('53944@uc002anj.2@uc002anf.1.B.0', '53944@uc002anj.2@uc002anf.1.A.0')	(0,0):136,(0,1):3,(1,0):763	0:763,1:3	(0,0):178,(1,0):705	0.489583	15
ALE	55010@uc001tjd.2@uc001tji.2	ENSG00000185480	0.58	0.43	0.73	0.32	0.22	0.43	0.26	5.26	('55010@uc001tjd.2@uc001tji.2.A.0', '55010@uc001tjd.2@uc001tji.2.B.0')	(0,0):251,(0,1):10,(1,0):46	0:46,1:10	(0,0):159,(0,1):20,(1,0):32	0:32,1:20	12
ALE	116984@uc003gsr.1@uc003gsp.1uc003gsq.1	ENSG00000047365,ENSG00000251160	0.79	0.59	0.95	0.49	0.36	0.65	0.3	5.24	('116984@uc003gsr.1@uc003gsp.1uc003gsq.1.B.0', '116984@uc003gsr.1@uc003gsp.1uc003gsq.1.A.0')	(0,0):563,(0,1):2,(1,0):104	0:104,1:2	(0,0):822,(0,1):11,(1,0):106	0:106,1:11	4
ALE	2968@uc010kpj.1@uc003ren.1uc003reo.1	ENSG00000196230,ENSG00000263608,ENSG00000202241,ENSG00000264594,ENSG00000264731,ENSG00000213780,ENSG00000228022,ENSG00000204580,ENSG00000137411,ENSG00000224328	0.52	0.36	0.69	0.86	0.61	0.99	-0.34	5.22	('2968@uc010kpj.1@uc003ren.1uc003reo.1.B.0', '2968@uc010kpj.1@uc003ren.1uc003reo.1.A.0')	(0,0):25707,(0,1):9,(1,0):103	0:103,1:9	(0,0):32482,(1,0):75	0.0520833	6
ALE	728340@uc003mpj.2uc1480.uc010ixy.1	ENSG00000250645,ENSG00000225138,ENSG00000250385,ENSG00000247872,ENSG00000250173,ENSG00000203594,ENSG00000221244,ENSG00000248126,ENSG00000232615,ENSG00000260066,ENSG00000249731,ENSG00000201026,ENSG00000170549,ENSG00000250921,ENSG00000231291,ENSG00000251371,ENSG00000249521,ENSG00000249941,ENSG00000223007,ENSG00000259861,ENSG00000221568,ENSG00000250730,ENSG00000212258,ENSG00000247732,ENSG00000251250…	0.87	0.69	0.98	0.5	0.14	0.76	0.37	5.2	('728340@uc003mpj.2uc1484.uc010ixy.1.B.0', '728340@uc003mpj.2uc1483.uc010ixy.1.A.0')	(0,0):656777,(0,1):1,(1,0):9	0:9,1:1	(0,0):710640,(0,1):4,(1,0):4	0:4,1:4	5
ALE	3113@uc010koc.1@uc003sgm.1	ENSG00000234515,ENSG00000212066,ENSG00000242574,ENSG00000263756,ENSG00000204252,ENSG00000248993,ENSG00000204257,ENSG00000231389	0.26	0.04	0.72	0.74	0.43	0.95	-0.48	5.17	('3113@uc010koc.1@uc003sgm.1.A.0', '3113@uc010koc.1@uc003sgm.1.B.0')	(0,0):8167,(0,1):2	0:0,1:2	(0,0):6193,(0,1):2,(1,0):8	0:8,1:2	6
ALE	11069@uc002uhu.2@uc002uhv.2uc002uhw.2	ENSG00000091428	0.22	0.1	0.4	0.49	0.32	0.66	-0.27	5.16	('11069@uc002uhu.2@uc002uhv.2uc002uhw.2.A.0', '11069@uc002uhu.2@uc002uhv.2uc002uhw.2.B.0')	(0,0):315,(0,1):21,(1,0):5	0:5,1:21	(0,0):394,(0,1):13,(1,0):13	0:13,1:13	2
ALE	1571@uc001lnj.1uc001lnk.1uc009ybl.1uc009ybm.1@uc001lnl.1	ENSG00000130649	0.02	0.01	0.07	0.4	0.11	0.85	-0.38	5.08	('1571@uc001lnj.1uc001lnk.1uc009ybl.1uc009ybm.1@uc001lnl.1.B.0', '1571@uc001lnj.1uc001lnk.1uc009ybl.1uc009ybm.1@uc001lnl.1.A.0')	(0,0):29,(0,1):6,(1,0):6	0:6,1:6	(0,0):71,(0,1):1,(1,0):26	0:26,1:1	10
ALE	8663@uc010byi.1uc001495.uc010byc.1	ENSG00000197272,ENSG00000176046,ENSG00000238684,ENSG00000259982,ENSG00000205609,ENSG00000233232,ENSG00000261832,ENSG00000188603,ENSG00000196502,ENSG00000197165,ENSG00000261419	0.6	0.4	0.82	0.25	0.09	0.49	0.35	5.07	('8663@uc010byi.1uc001499.uc010byc.1.B.0', '8663@uc010byi.1uc001498.uc010byc.1.A.0')	(0,0):8156,(0,1):7,(1,0):11	0:11,1:7	(0,0):5634,(0,1):12,(1,0):3	0:3,1:12	16
ALE	10994@uc010dzx.1@uc002nam.1uc010dzw.1	ENSG00000105135	0.27	0.15	0.43	0.66	0.35	0.96	-0.39	5.04	('10994@uc010dzx.1@uc002nam.1uc010dzw.1.B.0', '10994@uc010dzx.1@uc002nam.1uc010dzw.1.A.0')	(0,0):989,(0,1):8,(1,0):207	0:207,1:8	(0,0):645,(0,1):1,(1,0):148	0:148,1:1	19
ALE	79109@uc004bqa.1@uc010mxb.1	ENSG00000243845,ENSG00000119487	0.05	0	0.15	0.27	0.14	0.46	-0.22	5.04	('79109@uc004bqa.1@uc010mxb.1.B.0', '79109@uc004bqa.1@uc010mxb.1.A.0')	(0,0):173,(0,1):9	0:0,1:9	(0,0):189,(0,1):9,(1,0):10	0:10,1:9	9
ALE	56917@uc002pgw.1@uc010eld.1	ENSG00000105419	0.6	0.13	0.91	0.06	0.01	0.19	0.54	5.03	('56917@uc002pgw.1@uc010eld.1.A.0_56917@uc002pgw.1@uc010eld.1.A.1', '56917@uc002pgw.1@uc010eld.1.B.0')	(0,0):24,(1,0):3	1904-01-01 00:03:00	(0,0):65,(0,1):3,(1,0):4	0:4,1:3	19
ALE	130951@uc002smz.1@uc010ffp.1uc002smx.1uc002smy.1	ENSG00000159374	0.56	0.33	0.82	0.23	0.11	0.4	0.33	4.99	('130951@uc002smz.1@uc010ffp.1uc002smx.1uc002smy.1.B.0', '130951@uc002smz.1@uc010ffp.1uc002smx.1uc002smy.1.A.0')	(0,0):94,(0,1):3,(1,0):45	0:45,1:3	(0,0):106,(0,1):6,(1,0):17	0:17,1:6	2
ALE	23181@uc002zjn.1@uc002zjo.1uc002zjs.1	ENSG00000160305	0.84	0.66	0.97	0.52	0.35	0.7	0.32	4.95	('23181@uc002zjn.1@uc002zjo.1uc002zjs.1.B.0', '23181@uc002zjn.1@uc002zjo.1uc002zjs.1.A.0')	(0,0):894,(0,1):2,(1,0):218	0:218,1:2	(0,0):617,(0,1):6,(1,0):108	0:108,1:6	21
ALE	5519@uc001plx.1@uc001plw.1	ENSG00000137713	0.7	0.34	0.97	0.25	0.1	0.48	0.45	4.76	('5519@uc001plx.1@uc001plw.1.A.0', '5519@uc001plx.1@uc001plw.1.B.0')	(0,0):655,(1,0):752	0.522222	(0,0):332,(0,1):3,(1,0):918	0:918,1:3	11
ALE	27328@uc004efj.1@uc010nmv.1	ENSG00000211526,ENSG00000215089,ENSG00000102290	0.16	0.04	0.34	0.51	0.28	0.75	-0.35	4.72	('27328@uc004efj.1@uc010nmv.1.B.1_27328@uc004efj.1@uc010nmv.1.B.0', '27328@uc004efj.1@uc010nmv.1.A.0')	(0,0):8539,(0,1):14,(1,0):3	0:3,1:14	(0,0):9351,(0,1):6,(1,0):10	0:10,1:6	X
ALE	22920@uc001ggw.1@uc001ggv.1	ENSG00000243051,ENSG00000203260,ENSG00000075945	0.1	0.04	0.19	0.42	0.17	0.71	-0.32	4.67	('22920@uc001ggw.1@uc001ggv.1.B.0', '22920@uc001ggw.1@uc001ggv.1.A.0')	(0,0):1664,(0,1):7,(1,0):110	0:110,1:7	(0,0):2678,(0,1):2,(1,0):151	0:151,1:2	1
ALE	7932@uc003rrj.1@uc003qze.1	ENSG00000199290,ENSG00000227758,ENSG00000204657,ENSG00000204655,ENSG00000204642	0.85	0.59	0.99	0.44	0.19	0.71	0.41	4.67	('7932@uc003rrj.1@uc003qze.1.A.0', '7932@uc003rrj.1@uc003qze.1.B.0')	(0,0):3581,(1,0):6	1904-01-01 00:06:00	(0,0):2863,(0,1):6,(1,0):4	0:4,1:6	6
ALE	1540@uc002egn.1@uc002ego.2	ENSG00000083799	0.01	0	0.05	0.49	0.09	0.92	-0.48	4.56	('1540@uc002egn.1@uc002ego.2.B.0', '1540@uc002egn.1@uc002ego.2.A.0')	(0,0):617,(0,1):5,(1,0):74	0:74,1:5	(0,0):459,(1,0):45	1904-01-01 00:45:00	16
ALE	1756@uc004ddd.1@uc010ngm.1	ENSG00000198947	0.05	0	0.33	0.58	0.07	0.97	-0.53	4.56	('1756@uc004ddd.1@uc010ngm.1.B.0', '1756@uc004ddd.1@uc010ngm.1.A.0')	(0,0):2206,(0,1):3,(1,0):9	0:9,1:3	(0,0):2270,(1,0):6	1904-01-01 00:06:00	X
ALE	493@uc009xaq.1@uc001gzv.1uc001gzw.1uc001gzx.1uc009xar.1	ENSG00000058668	0.87	0.77	0.96	0.62	0.44	0.81	0.25	4.54	('493@uc009xaq.1@uc001gzv.1uc001gzw.1uc001gzx.1uc009xar.1.B.0', '493@uc009xaq.1@uc001gzv.1uc001gzw.1uc001gzx.1uc009xar.1.A.0')	(0,0):136,(0,1):4,(1,0):1441	0:1441,1:4	(0,0):64,(0,1):5,(1,0):360	0:360,1:5	1
ALE	51750@uc002yfv.1@uc002yft.1uc002yfu.1uc002yfx.1	ENSG00000243509,ENSG00000026036,ENSG00000258366	0.59	0.13	0.97	0.05	0.02	0.16	0.54	4.53	('51750@uc002yfv.1@uc002yft.1uc002yfu.1uc002yfx.1.B.0', '51750@uc002yfv.1@uc002yft.1uc002yfu.1uc002yfx.1.A.0')	(0,0):561,(1,0):47	1904-01-01 00:47:00	(0,0):558,(0,1):5,(1,0):50	0:50,1:5	20
ALE	2893@uc001pit.2@uc001piw.2	ENSG00000222663,ENSG00000263371,ENSG00000255403,ENSG00000152578	0.63	0.37	0.86	0.29	0.11	0.5	0.34	4.46	('2893@uc001pit.2@uc001piw.2.B.1_2893@uc001pit.2@uc001piw.2.B.0', '2893@uc001pit.2@uc001piw.2.A.0')	(0,0):544,(0,1):4,(1,0):10	0:10,1:4	(0,0):1447,(0,1):12,(1,0):6	0:6,1:12	11
ALE	6473@uc004cph.1@uc004cpi.1	ENSG00000185960	0.21	0.04	0.61	0.66	0.38	0.88	-0.45	4.41	('6473@uc004cph.1@uc004cpi.1.A.0', '6473@uc004cph.1@uc004cpi.1.B.0')	(0,0):28,(0,1):2,(1,0):2	0:2,1:2	(0,0):159,(0,1):2,(1,0):30	0:30,1:2	X
ALE	135112@uc003qaf.2@uc003qag.2	ENSG00000111912,ENSG00000260527	0.15	0.1	0.22	0.35	0.22	0.51	-0.2	4.38	('135112@uc003qaf.2@uc003qag.2.A.0', '135112@uc003qaf.2@uc003qag.2.B.0')	(0,0):77,(0,1):55,(1,0):22	0:22,1:55	(0,0):38,(0,1):13,(1,0):15	0:15,1:13	6
ALE	23242@uc003tpt.2@uc003tpo.2uc003tpp.2uc003tpq.2uc003tpr.2	ENSG00000106078	0.64	0.28	0.9	0.24	0.12	0.37	0.4	4.38	('23242@uc003tpt.2@uc003tpo.2uc003tpp.2uc003tpq.2uc003tpr.2.A.0', '23242@uc003tpt.2@uc003tpo.2uc003tpp.2uc003tpq.2uc003tpr.2.B.0')	(0,0):73,(0,1):1,(1,0):5	0:5,1:1	(0,0):250,(0,1):20,(1,0):12	0:12,1:20	7
ALE	9732@uc003vgb.1@uc003vga.1	ENSG00000222346,ENSG00000234358,ENSG00000128512	0.21	0.04	0.52	0.71	0.36	0.95	-0.5	4.35	('9732@uc003vgb.1@uc003vga.1.A.0', '9732@uc003vgb.1@uc003vga.1.B.0')	(0,0):287,(0,1):6,(1,0):1	0:1,1:6	(0,0):445,(1,0):3	1904-01-01 00:03:00	7
ALE	7942@uc003oqy.1@uc010jxo.1	ENSG00000112561	0.07	0.01	0.23	0.6	0.17	0.98	-0.53	4.31	('7942@uc003oqy.1@uc010jxo.1.B.0', '7942@uc003oqy.1@uc010jxo.1.A.0')	(0,0):30,(0,1):6,(1,0):1	0:1,1:6	(0,0):24,(1,0):3	1904-01-01 00:03:00	6
ALE	54946@uc010hsd.1@uc003eii.1uc003eil.1	ENSG00000114544	0.2	0.09	0.36	0.63	0.27	0.91	-0.43	4.22	('54946@uc010hsd.1@uc003eii.1uc003eil.1.B.0', '54946@uc010hsd.1@uc003eii.1uc003eil.1.A.0')	(0,0):264,(0,1):5,(1,0):218	0:218,1:5	(0,0):220,(1,0):153	0.10625	3
ALE	284656@uc001cbw.2@uc009vvi.1	ENSG00000200421,ENSG00000183317	0.1	0.02	0.27	0.35	0.19	0.51	-0.25	4.19	('284656@uc001cbw.2@uc009vvi.1.B.0', '284656@uc001cbw.2@uc009vvi.1.A.0')	(0,0):67,(0,1):11,(1,0):1	0:1,1:11	(0,0):241,(0,1):14,(1,0):11	0:11,1:14	1
ALE	91526@uc002uuc.2@uc002uub.2	ENSG00000065413	0.06	0.02	0.11	0.56	0.12	0.94	-0.5	4.18	('91526@uc002uuc.2@uc002uub.2.B.0', '91526@uc002uuc.2@uc002uub.2.A.0')	(0,0):555,(0,1):11,(1,0):9	0:9,1:11	(0,0):217,(1,0):6	1904-01-01 00:06:00	2
ALE	7932@uc003rrj.1@uc003nmr.1	ENSG00000238438,ENSG00000164379,ENSG00000243439,ENSG00000054598,ENSG00000236086,ENSG00000228365,ENSG00000244041,ENSG00000261015,ENSG00000232654,ENSG00000229282,ENSG00000217707,ENSG00000219992,ENSG00000233068,ENSG00000217135,ENSG00000217566,ENSG00000216657,ENSG00000145965,ENSG00000252668,ENSG00000216307,ENSG00000201185,ENSG00000260239,ENSG00000205444,ENSG00000238801,ENSG00000217385,ENSG00000217030…	0.18	0.01	0.48	0.59	0.32	0.86	-0.41	4.17	('7932@uc003rrj.1@uc003nmr.1.A.0', '7932@uc003rrj.1@uc003nmr.1.B.0')	(0,0):627603,(0,1):6	0:0,1:6	(0,0):453093,(0,1):4,(1,0):6	0:6,1:4	6
ALE	79705@uc002bwq.1@uc002bwr.1	ENSG00000154237	0.58	0.39	0.88	0.27	0.16	0.43	0.31	4.15	('79705@uc002bwq.1@uc002bwr.1.B.0', '79705@uc002bwq.1@uc002bwr.1.A.0')	(0,0):1755,(0,1):3,(1,0):198	0:198,1:3	(0,0):1558,(0,1):8,(1,0):126	0:126,1:8	15
ALE	368@uc002deo.2@uc002dem.1uc002den.2	ENSG00000091262	0.81	0.5	0.98	0.38	0.14	0.64	0.43	4.14	('368@uc002deo.2@uc002dem.1uc002den.2.B.0', '368@uc002deo.2@uc002dem.1uc002den.2.A.0')	(0,0):153,(1,0):5	1904-01-01 00:05:00	(0,0):431,(0,1):6,(1,0):4	0:4,1:6	16
ALE	23139@uc001cox.1@uc009vya.1	ENSG00000086015	0.25	0.07	0.61	0.77	0.35	0.99	-0.52	4.11	('23139@uc001cox.1@uc009vya.1.B.0', '23139@uc001cox.1@uc009vya.1.A.0')	(0,0):500,(0,1):2,(1,0):20	0:20,1:2	(0,0):580,(1,0):27	1904-01-01 00:27:00	1
ALE	6002@uc003ggx.1@uc010icu.1uc003ghb.2	ENSG00000159788	0.16	0.02	0.6	0.73	0.26	0.99	-0.57	4.01	('6002@uc003ggx.1@uc010icu.1uc003ghb.2.B.0', '6002@uc003ggx.1@uc010icu.1uc003ghb.2.A.0')	(0,0):403,(0,1):2	0:0,1:2	(0,0):580,(1,0):3	1904-01-01 00:03:00	4
ALE	843@uc002uxi.1@uc002uxl.1uc002uxm.1	ENSG00000003400	0.03	0	0.1	0.26	0.09	0.46	-0.23	3.98	('843@uc002uxi.1@uc002uxl.1uc002uxm.1.B.0', '843@uc002uxi.1@uc002uxl.1uc002uxm.1.A.0')	(0,0):1610,(0,1):13	0:0,1:13	(0,0):1122,(0,1):6,(1,0):6	0:6,1:6	2
ALE	151011@uc002tez.1@uc002tev.1	ENSG00000186522	0.72	0.3	0.97	0.24	0.13	0.39	0.48	3.95	('151011@uc002tez.1@uc002tev.1.B.0', '151011@uc002tez.1@uc002tev.1.A.0')	(0,0):46,(1,0):27	1904-01-01 00:27:00	(0,0):233,(0,1):9,(1,0):152	0:152,1:9	2
ALE	1375@uc003bmt.1uc00130.uc003bmp.1	ENSG00000205560,ENSG00000100288,ENSG00000254413	0.3	0.19	0.42	0.09	0.02	0.21	0.21	3.94	('1375@uc003bmt.1uc00134.uc003bmp.1.B.0_1375@uc003bmt.1uc00135.uc003bmp.1.B.1', '1375@uc003bmt.1uc00133.uc003bmp.1.A.0')	(0,0):420,(0,1):36,(1,0):16	0:16,1:36	(0,0):171,(0,1):25,(1,0):2	0:2,1:25	22
ALE	51105@uc003ytq.1@uc003yts.1	ENSG00000129292	0.36	0.24	0.53	0.68	0.45	0.86	-0.32	3.91	('51105@uc003ytq.1@uc003yts.1.A.0', '51105@uc003ytq.1@uc003yts.1.B.0')	(0,0):2997,(0,1):11,(1,0):104	0:104,1:11	(0,0):2262,(0,1):2,(1,0):85	0:85,1:2	8
ALE	84623@uc001qec.1@uc001qea.1uc001qeb.1	ENSG00000149571	0.33	0.15	0.59	0.71	0.46	0.96	-0.38	3.91	('84623@uc001qec.1@uc001qea.1uc001qeb.1.A.0', '84623@uc001qec.1@uc001qea.1uc001qeb.1.B.0')	(0,0):91,(0,1):8,(1,0):4	0:4,1:8	(0,0):59,(0,1):2,(1,0):8	0:8,1:2	11
ALE	1842@uc004asi.2@uc010mqz.1uc004asg.1uc004ash.1	ENSG00000106823	0.89	0.64	1	0.52	0.29	0.73	0.37	3.88	('1842@uc004asi.2@uc010mqz.1uc004asg.1uc004ash.1.B.0', '1842@uc004asi.2@uc010mqz.1uc004asg.1uc004ash.1.A.0')	(0,0):159,(1,0):6	1904-01-01 00:06:00	(0,0):172,(0,1):7,(1,0):8	0:8,1:7	9
ALE	11030@uc010lvh.1@uc003xid.1uc003xie.1	ENSG00000157110	0.94	0.82	1	0.6	0.37	0.83	0.34	3.84	('11030@uc010lvh.1@uc003xid.1uc003xie.1.B.2_11030@uc010lvh.1@uc003xid.1uc003xie.1.B.1_11030@uc010lvh.1@uc003xid.1uc003xie.1.B.0', '11030@uc010lvh.1@uc003xid.1uc003xie.1.A.0')	(0,0):158,(1,0):35	1904-01-01 00:35:00	(0,0):215,(0,1):5,(1,0):14	0:14,1:5	8
ALE	8527@uc002vuk.1@uc010fyh.1	ENSG00000077044	0.74	0.55	0.92	0.42	0.22	0.62	0.32	3.76	('8527@uc002vuk.1@uc010fyh.1.A.0', '8527@uc002vuk.1@uc010fyh.1.B.0')	(0,0):660,(0,1):4,(1,0):20	0:20,1:4	(0,0):437,(0,1):9,(1,0):9	0:9,1:9	2
ALE	57575@uc003igz.1@uc003iha.1	ENSG00000138650	0.46	0.27	0.64	0.76	0.59	0.9	-0.3	3.74	('57575@uc003igz.1@uc003iha.1.A.0', '57575@uc003igz.1@uc003iha.1.B.0')	(0,0):43,(0,1):7,(1,0):18	0:18,1:7	(0,0):147,(0,1):4,(1,0):45	0:45,1:4	4
ALE	221035@uc009xpl.1@uc001jmt.1	ENSG00000165476	0.06	0.02	0.17	0.52	0.12	0.96	-0.46	3.7	('221035@uc009xpl.1@uc001jmt.1.B.0', '221035@uc009xpl.1@uc001jmt.1.A.0')	(0,0):264,(0,1):4,(1,0):95	0:95,1:4	(0,0):278,(1,0):54	1904-01-01 00:54:00	10
ALE	56834@uc001nzh.1@uc001nzg.1	ENSG00000173264	0.56	0.41	0.71	0.81	0.67	0.92	-0.25	3.7	('56834@uc001nzh.1@uc001nzg.1.B.0', '56834@uc001nzh.1@uc001nzg.1.A.0')	(0,0):115,(0,1):13,(1,0):27	0:27,1:13	(0,0):94,(0,1):4,(1,0):34	0:34,1:4	11
ALE	5495@uc002rts.1@uc002rtu.1	ENSG00000138032	0.16	0.1	0.25	0.43	0.22	0.75	-0.27	3.69	('5495@uc002rts.1@uc002rtu.1.B.0', '5495@uc002rts.1@uc002rtu.1.A.0')	(0,0):607,(0,1):14,(1,0):168	0:168,1:14	(0,0):325,(0,1):3,(1,0):118	0:118,1:3	2
ALE	4763@uc002hge.1@uc010csn.1	ENSG00000196712	0.35	0.24	0.49	0.63	0.41	0.82	-0.28	3.66	('4763@uc002hge.1@uc010csn.1.B.0', '4763@uc002hge.1@uc010csn.1.A.0')	(0,0):1353,(0,1):11,(1,0):206	0:206,1:11	(0,0):1095,(0,1):4,(1,0):253	0:253,1:4	17
ALE	57496@uc002dch.2@uc002dcg.1uc002dci.1uc002dcj.1	ENSG00000257026,ENSG00000186260	0.81	0.68	0.9	0.6	0.46	0.73	0.21	3.63	('57496@uc002dch.2@uc002dcg.1uc002dci.1uc002dcj.1.B.0', '57496@uc002dch.2@uc002dcg.1uc002dci.1uc002dcj.1.A.0')	(0,0):89,(0,1):7,(1,0):198	0:198,1:7	(0,0):137,(0,1):13,(1,0):122	0:122,1:13	16
ALE	23114@uc001hbn.1@uc03267.uc001hbo.1	ENSG00000163531	0.25	0.09	0.47	0.58	0.4	0.77	-0.33	3.55	('23114@uc001hbn.1@uc03271.uc001hbo.1.B.0', '23114@uc001hbn.1@uc03270.uc001hbo.1.A.0')	(0,0):11,(0,1):9,(1,0):5	0:5,1:9	(0,0):77,(0,1):8,(1,0):20	0:20,1:8	1
ALE	54972@uc001nqk.2@uc001nqm.1	ENSG00000006118	0.78	0.5	0.96	0.44	0.24	0.67	0.34	3.55	('54972@uc001nqk.2@uc001nqm.1.B.0', '54972@uc001nqk.2@uc001nqm.1.A.0')	(0,0):9,(0,1):2,(1,0):19	0:19,1:2	(0,0):8,(0,1):6,(1,0):9	0:9,1:6	11
ALE	1185@uc009vnf.1uc009vng.1@uc001ate.2	ENSG00000242349,ENSG00000011021	0.14	0.01	0.62	0.64	0.12	0.98	-0.5	3.52	('1185@uc009vnf.1uc009vng.1@uc001ate.2.B.0', '1185@uc009vnf.1uc009vng.1@uc001ate.2.A.0')	(0,0):232,(0,1):1,(1,0):135	0:135,1:1	(0,0):280,(1,0):203	0.140972	1
ALE	51326@uc002iks.2@uc002ikp.1	ENSG00000185829	0.82	0.68	0.93	0.57	0.42	0.74	0.25	3.51	('51326@uc002iks.2@uc002ikp.1.A.0', '51326@uc002iks.2@uc002ikp.1.B.0')	(0,0):1287,(0,1):3,(1,0):407	0:407,1:3	(0,0):974,(0,1):10,(1,0):301	0:301,1:10	17
ALE	51256@uc003naq.1@uc010jpd.1	ENSG00000145979	0.05	0.01	0.26	0.51	0.16	0.94	-0.46	3.5	('51256@uc003naq.1@uc010jpd.1.A.0', '51256@uc003naq.1@uc010jpd.1.B.0')	(0,0):387,(0,1):3,(1,0):72	0:72,1:3	(0,0):326,(1,0):59	1904-01-01 00:59:00	6
ALE	7353@uc010grq.1@uc002zpp.1	ENSG00000070010	0.77	0.63	0.88	0.55	0.45	0.67	0.22	3.47	('7353@uc010grq.1@uc002zpp.1.B.0', '7353@uc010grq.1@uc002zpp.1.A.0')	(0,0):617,(0,1):7,(1,0):303	0:303,1:7	(0,0):931,(0,1):18,(1,0):260	0:260,1:18	22
ALE	135656@uc003rww.1@uc003nsg.1	ENSG00000236086,ENSG00000228365,ENSG00000244041,ENSG00000261015,ENSG00000232654,ENSG00000229282,ENSG00000217707,ENSG00000219992,ENSG00000233068,ENSG00000217135,ENSG00000217566,ENSG00000216657,ENSG00000145965,ENSG00000252668,ENSG00000216307,ENSG00000201185,ENSG00000260239,ENSG00000205444,ENSG00000238801,ENSG00000217385,ENSG00000217030,ENSG00000219607,ENSG00000215057,ENSG00000264121,ENSG00000263572…	0.16	0.05	0.34	0.48	0.2	0.73	-0.32	3.43	('135656@uc003rww.1@uc003nsg.1.B.0', '135656@uc003rww.1@uc003nsg.1.A.0')	(0,0):709548,(0,1):16,(1,0):2	0:2,1:16	(0,0):522096,(0,1):6,(1,0):6	0:6,1:6	6
ALE	51105@uc003yts.1@uc003ytt.1	ENSG00000129292	0.54	0.41	0.69	0.81	0.61	0.94	-0.27	3.43	('51105@uc003yts.1@uc003ytt.1.B.0', '51105@uc003yts.1@uc003ytt.1.A.0')	(0,0):1396,(0,1):11,(1,0):766	0:766,1:11	(0,0):1216,(0,1):2,(1,0):601	0:601,1:2	8
ALE	5495@uc002rts.1@uc002rtw.1	ENSG00000138032	0.22	0.15	0.33	0.51	0.27	0.79	-0.29	3.37	('5495@uc002rts.1@uc002rtw.1.B.0', '5495@uc002rts.1@uc002rtw.1.A.0')	(0,0):833,(0,1):14,(1,0):452	0:452,1:14	(0,0):467,(0,1):3,(1,0):317	0:317,1:3	2
ALE	259232@uc001voz.1uc001vpa.1@uc001vox.1	ENSG00000102452	0.19	0.01	0.61	0.62	0.33	0.89	-0.43	3.34	('259232@uc001voz.1uc001vpa.1@uc001vox.1.B.0', '259232@uc001voz.1uc001vpa.1@uc001vox.1.A.0')	(0,0):112,(0,1):2	0:0,1:2	(0,0):352,(0,1):1,(1,0):5	0:5,1:1	13
ALE	6473@uc004fou.1@uc004cpi.1	ENSG00000185960	0.24	0.02	0.56	0.64	0.39	0.9	-0.4	3.33	('6473@uc004fou.1@uc004cpi.1.A.0', '6473@uc004fou.1@uc004cpi.1.B.0')	(0,0):28,(0,1):2,(1,0):2	0:2,1:2	(0,0):159,(0,1):2,(1,0):30	0:30,1:2	X
ALE	7923@uc003shb.1@uc003odi.1	ENSG00000201185,ENSG00000260239,ENSG00000205444,ENSG00000238801,ENSG00000217385,ENSG00000217030,ENSG00000219607,ENSG00000215057,ENSG00000264121,ENSG00000263572,ENSG00000218868,ENSG00000203498,ENSG00000225092,ENSG00000219993,ENSG00000236512,ENSG00000219294,ENSG00000251164,ENSG00000230939,ENSG00000216368,ENSG00000221583,ENSG00000229950,ENSG00000263705,ENSG00000216359,ENSG00000205318,ENSG00000111843…	0.91	0.64	0.99	0.47	0.12	0.89	0.44	3.32	('7923@uc003shb.1@uc003odi.1.B.0', '7923@uc003shb.1@uc003odi.1.A.0')	(0,0):790779,(1,0):10	1904-01-01 00:10:00	(0,0):568266,(0,1):1,(1,0):1	0:1,1:1	6
ALE	2903@uc010buk.1@uc002czp.1	ENSG00000183454	0.71	0.36	0.97	0.36	0.17	0.63	0.35	3.31	('2903@uc010buk.1@uc002czp.1.B.0_2903@uc010buk.1@uc002czp.1.B.1', '2903@uc010buk.1@uc002czp.1.A.0')	(0,0):425,(1,0):2	1904-01-01 00:02:00	(0,0):1700,(0,1):5,(1,0):12	0:12,1:5	16
ALE	54972@uc001nqk.2@uc001nqi.1uc001nqj.1	ENSG00000006118	0.85	0.67	0.97	0.54	0.31	0.75	0.31	3.31	('54972@uc001nqk.2@uc001nqi.1uc001nqj.1.B.0', '54972@uc001nqk.2@uc001nqi.1uc001nqj.1.A.0')	(0,0):7,(0,1):2,(1,0):21	0:21,1:2	(0,0):8,(0,1):6,(1,0):10	0:10,1:6	11
ALE	285966@uc003wdf.1uc003wdg.1uc003wdh.1@uc003wdi.1	ENSG00000170379,ENSG00000159860	0.77	0.5	0.94	0.44	0.26	0.64	0.33	3.24	('285966@uc003wdf.1uc003wdg.1uc003wdh.1@uc003wdi.1.B.0', '285966@uc003wdf.1uc003wdg.1uc003wdh.1@uc003wdi.1.A.0')	(0,0):13,(0,1):1,(1,0):22	0:22,1:1	(0,0):39,(0,1):5,(1,0):28	0:28,1:5	7
ALE	84871@uc001crv.1@uc001cru.2	ENSG00000186094	0.24	0.11	0.41	0.51	0.35	0.7	-0.27	3.22	('84871@uc001crv.1@uc001cru.2.A.0', '84871@uc001crv.1@uc001cru.2.B.0')	(0,0):117,(0,1):12,(1,0):9	0:9,1:12	(0,0):320,(0,1):8,(1,0):22	0:22,1:8	1
ALE	84465@uc002apn.1@uc010bhn.1uc002apm.2uc002apl.2	ENSG00000157890	0.16	0.05	0.41	0.58	0.2	0.96	-0.42	3.21	('84465@uc002apn.1@uc010bhn.1uc002apm.2uc002apl.2.B.0', '84465@uc002apn.1@uc010bhn.1uc002apm.2uc002apl.2.A.0')	(0,0):27,(0,1):3,(1,0):67	0:67,1:3	(0,0):24,(1,0):60	0.0416667	15
ALE	1842@uc004asi.2@uc004asf.2	ENSG00000106823	0.1	0.01	0.38	0.47	0.18	0.74	-0.37	3.18	('1842@uc004asi.2@uc004asf.2.A.0', '1842@uc004asi.2@uc004asf.2.B.0')	(0,0):178,(0,1):4	0:0,1:4	(0,0):198,(0,1):3,(1,0):7	0:7,1:3	9
ALE	5108@uc003wyg.2@uc010lta.1	ENSG00000078674	0.37	0.29	0.46	0.6	0.43	0.77	-0.23	3.16	('5108@uc003wyg.2@uc010lta.1.A.0', '5108@uc003wyg.2@uc010lta.1.B.0')	(0,0):1750,(0,1):39,(1,0):112	0:112,1:39	(0,0):909,(0,1):8,(1,0):58	0:58,1:8	8
ALE	117532@uc010gap.1@uc002wgf.1uc002wgg.1	ENSG00000149488	0.31	0.06	0.72	0.77	0.38	0.98	-0.46	3.12	('117532@uc010gap.1@uc002wgf.1uc002wgg.1.A.0', '117532@uc010gap.1@uc002wgf.1uc002wgg.1.B.0')	(0,0):68,(0,1):2,(1,0):1	0:1,1:2	(0,0):182,(1,0):4	1904-01-01 00:04:00	20
ALE	4430@uc002uss.1@uc002ust.1	ENSG00000252130,ENSG00000128641	0.56	0.08	0.95	0.04	0	0.23	0.52	3.03	('4430@uc002uss.1@uc002ust.1.B.0', '4430@uc002uss.1@uc002ust.1.A.0')	(0,0):56,(1,0):5	1904-01-01 00:05:00	(0,0):161,(0,1):2,(1,0):3	0:3,1:2	2
ALE	9054@uc002xdx.2@uc002xdt.1uc002xdu.1uc002xdw.1	ENSG00000244005	0.51	0.35	0.7	0.8	0.59	0.97	-0.29	3.03	('9054@uc002xdx.2@uc002xdt.1uc002xdu.1uc002xdw.1.B.0', '9054@uc002xdx.2@uc002xdt.1uc002xdu.1uc002xdw.1.A.0')	(0,0):346,(0,1):8,(1,0):118	0:118,1:8	(0,0):393,(0,1):2,(1,0):149	0:149,1:2	20
ALE	55604@uc003nez.1@uc010jpx.1uc010jpy.1	ENSG00000079691	0.31	0.17	0.49	0.62	0.39	0.85	-0.31	3.02	('55604@uc003nez.1@uc010jpx.1uc010jpy.1.A.0', '55604@uc003nez.1@uc010jpx.1uc010jpy.1.B.0')	(0,0):442,(0,1):14,(1,0):9	0:9,1:14	(0,0):739,(0,1):5,(1,0):12	0:12,1:5	6
ALE	8837@uc002uwy.2@uc002uxa.2	ENSG00000238829,ENSG00000003402	0.48	0.38	0.59	0.69	0.56	0.82	-0.21	3	('8837@uc002uwy.2@uc002uxa.2.A.0', '8837@uc002uwy.2@uc002uxa.2.B.0')	(0,0):948,(0,1):20,(1,0):530	0:530,1:20	(0,0):986,(0,1):8,(1,0):506	0:506,1:8	2
ALE	55680@uc001joe.1@uc001joc.1	ENSG00000204130	0.77	0.47	0.99	0.38	0.13	0.79	0.39	2.99	('55680@uc001joe.1@uc001joc.1.B.0', '55680@uc001joe.1@uc001joc.1.A.0')	(0,0):172,(1,0):37	1904-01-01 00:37:00	(0,0):136,(0,1):2,(1,0):13	0:13,1:2	10
ALE	8997@uc010hrv.1uc003ehf.1@uc003ehg.1uc003ehk.1	ENSG00000160145	0.8	0.41	0.98	0.4	0.21	0.63	0.4	2.95	('8997@uc010hrv.1uc003ehf.1@uc003ehg.1uc003ehk.1.B.0', '8997@uc010hrv.1uc003ehf.1@uc003ehg.1uc003ehk.1.A.0')	(0,0):247,(1,0):4	1904-01-01 00:04:00	(0,0):894,(0,1):9,(1,0):10	0:10,1:9	3
ALE	3899@uc010fir.1@uc002taf.1uc002tag.1	ENSG00000144218	0.71	0.2	0.99	0.21	0.05	0.6	0.5	2.89	('3899@uc010fir.1@uc002taf.1uc002tag.1.B.0', '3899@uc010fir.1@uc002taf.1uc002tag.1.A.0')	(0,0):245,(1,0):8	1904-01-01 00:08:00	(0,0):875,(0,1):2,(1,0):17	0:17,1:2	2
ALE	64087@uc003msp.1@uc010iyv.1	ENSG00000248126,ENSG00000232615,ENSG00000260066,ENSG00000249731,ENSG00000201026,ENSG00000170549,ENSG00000250921,ENSG00000231291,ENSG00000251371,ENSG00000249521,ENSG00000249941,ENSG00000223007,ENSG00000259861,ENSG00000221568,ENSG00000250730,ENSG00000212258,ENSG00000247732,ENSG00000251250,ENSG00000251678,ENSG00000223597,ENSG00000251168,ENSG00000199773,ENSG00000247516,ENSG00000266471,ENSG00000249782…	0.07	0	0.41	0.6	0.12	0.97	-0.53	2.86	('64087@uc003msp.1@uc010iyv.1.A.0', '64087@uc003msp.1@uc010iyv.1.B.0')	(0,0):639996,(0,1):2,(1,0):1	0:1,1:2	(0,0):693151,(1,0):12	1904-01-01 00:12:00	5
ALE	56999@uc003dmk.1@uc003dmg.1	ENSG00000163638	0.86	0.64	0.98	0.54	0.31	0.77	0.32	2.85	('56999@uc003dmk.1@uc003dmg.1.B.0_56999@uc003dmk.1@uc003dmg.1.B.1', '56999@uc003dmk.1@uc003dmg.1.A.0')	(0,0):380,(1,0):25	1904-01-01 00:25:00	(0,0):635,(0,1):4,(1,0):21	0:21,1:4	3
ALE	57731@uc010egy.1@uc002ony.1uc002onz.1uc010egx.1uc010eha.1	ENSG00000160460	0.82	0.5	0.98	0.48	0.27	0.7	0.34	2.8	('57731@uc010egy.1@uc002ony.1uc002onz.1uc010egx.1uc010eha.1.B.0', '57731@uc010egy.1@uc002ony.1uc002onz.1uc010egx.1uc010eha.1.A.0')	(0,0):55,(1,0):7	1904-01-01 00:07:00	(0,0):122,(0,1):6,(1,0):8	0:8,1:6	19
ALE	8425@uc002ook.1@uc002oog.1uc002ooh.1uc002ooi.1uc002ooj.1uc002ool.1	ENSG00000090006	0.18	0.06	0.42	0.61	0.22	0.94	-0.43	2.79	('8425@uc002ook.1@uc002oog.1uc002ooh.1uc002ooi.1uc002ooj.1uc002ool.1.B.0', '8425@uc002ook.1@uc002oog.1uc002ooh.1uc002ooi.1uc002ooj.1uc002ool.1.A.0')	(0,0):35,(0,1):5,(1,0):22	0:22,1:5	(0,0):22,(1,0):6	1904-01-01 00:06:00	19
ALE	51105@uc003ytr.1uc010mdv.1uc003ytv.1@uc003yts.1	ENSG00000129292	0.44	0.31	0.59	0.71	0.51	0.9	-0.27	2.78	('51105@uc003ytr.1uc010mdv.1uc003ytv.1@uc003yts.1.A.0', '51105@uc003ytr.1uc010mdv.1uc003ytv.1@uc003yts.1.B.0')	(0,0):1392,(0,1):11,(1,0):322	0:322,1:11	(0,0):1034,(0,1):2,(1,0):225	0:225,1:2	8
ALE	6829@uc010egp.1@uc002olo.2uc002oln.2uc002olp.2uc002olq.2uc002olr.2	ENSG00000196235	0.31	0.04	0.74	0.69	0.17	1	-0.38	2.76	('6829@uc010egp.1@uc002olo.2uc002oln.2uc002olp.2uc002olq.2uc002olr.2.B.0', '6829@uc010egp.1@uc002olo.2uc002oln.2uc002olp.2uc002olq.2uc002olr.2.A.0')	(0,0):743,(0,1):1,(1,0):206	0:206,1:1	(0,0):598,(1,0):179	0.124306	19
ALE	22837@uc002uct.2@uc002ucn.1uc002uco.1uc002ucp.1uc002ucq.1uc002ucr.1	ENSG00000206869,ENSG00000224331,ENSG00000082438	0.44	0.28	0.64	0.76	0.47	0.94	-0.32	2.71	('22837@uc002uct.2@uc002ucn.1uc002uco.1uc002ucp.1uc002ucq.1uc002ucr.1.B.0', '22837@uc002uct.2@uc002ucn.1uc002uco.1uc002ucp.1uc002ucq.1uc002ucr.1.A.0')	(0,0):678,(0,1):9,(1,0):58	0:58,1:9	(0,0):434,(1,0):25	1904-01-01 00:25:00	2
ALE	253714@uc003ppc.1@uc010kcn.1	ENSG00000146263	0.72	0.62	0.82	0.51	0.37	0.65	0.21	2.7	('253714@uc003ppc.1@uc010kcn.1.B.0', '253714@uc003ppc.1@uc010kcn.1.A.0')	(0,0):701,(0,1):17,(1,0):53	0:53,1:17	(0,0):439,(0,1):21,(1,0):24	0:24,1:21	6
ALE	64342@uc002rdy.2@uc002rdw.1	ENSG00000118960	0.86	0.68	0.95	0.6	0.4	0.77	0.26	2.7	('64342@uc002rdy.2@uc002rdw.1.B.0', '64342@uc002rdy.2@uc002rdw.1.A.0')	(0,0):91,(0,1):2,(1,0):23	0:23,1:2	(0,0):103,(0,1):6,(1,0):13	0:13,1:6	2
ALE	219790@uc001jlv.1uc001jlw.1@uc009xpf.1	ENSG00000182010	0.86	0.68	0.98	0.6	0.43	0.79	0.26	2.69	('219790@uc001jlv.1uc001jlw.1@uc009xpf.1.A.0', '219790@uc001jlv.1uc001jlw.1@uc009xpf.1.B.0')	(0,0):18,(0,1):2,(1,0):72	0:72,1:2	(0,0):26,(0,1):7,(1,0):49	0:49,1:7	10
ALE	80254@uc003eqp.1@uc003eqm.1	ENSG00000182923	0.04	0.02	0.07	0.49	0.09	0.86	-0.45	2.67	('80254@uc003eqp.1@uc003eqm.1.A.0', '80254@uc003eqp.1@uc003eqm.1.B.0')	(0,0):365,(0,1):9,(1,0):26	0:26,1:9	(0,0):315,(1,0):25	1904-01-01 00:25:00	3
ALE	352954@uc003uuc.1@uc003uua.2	ENSG00000222482,ENSG00000160844,ENSG00000239521	0.83	0.59	0.97	0.55	0.39	0.69	0.28	2.65	('352954@uc003uuc.1@uc003uua.2.A.0_352954@uc003uuc.1@uc003uua.2.A.1_352954@uc003uuc.1@uc003uua.2.A.2_352954@uc003uuc.1@uc003uua.2.A.3_352954@uc003uuc.1@uc003uua.2.A.4', '352954@uc003uuc.1@uc003uua.2.B.0_352954@uc003uuc.1@uc003uua.2.B.1')	(0,0):249,(0,1):1,(1,0):12,(1,1):1	0:13,1:1	(0,0):235,(0,1):13,(1,0):24	0:24,1:13	7
ALE	2968@uc010kpj.1@uc010kmc.1	ENSG00000196230,ENSG00000263608,ENSG00000202241,ENSG00000264594,ENSG00000264731,ENSG00000213780,ENSG00000228022,ENSG00000204580,ENSG00000137411,ENSG00000224328	0.44	0.21	0.69	0.82	0.51	0.98	-0.38	2.63	('2968@uc010kpj.1@uc010kmc.1.B.0', '2968@uc010kpj.1@uc010kmc.1.A.0')	(0,0):25525,(0,1):9,(1,0):7	0:7,1:9	(0,0):32351,(1,0):6	1904-01-01 00:06:00	6
ALE	83856@uc004bcp.1@uc010mtl.1	ENSG00000229419,ENSG00000106701	0.59	0.18	0.96	0.16	0.01	0.49	0.43	2.63	('83856@uc004bcp.1@uc010mtl.1.B.0', '83856@uc004bcp.1@uc010mtl.1.A.0')	(0,0):784,(1,0):2	1904-01-01 00:02:00	(0,0):710,(0,1):2	0:0,1:2	9
ALE	5271@uc002ljt.1@uc002lju.1uc002ljv.1	ENSG00000166401	0.78	0.56	0.94	0.46	0.26	0.73	0.32	2.6	('5271@uc002ljt.1@uc002lju.1uc002ljv.1.B.0', '5271@uc002ljt.1@uc002lju.1uc002ljv.1.A.0')	(0,0):13,(0,1):1,(1,0):160	0:160,1:1	(0,0):10,(0,1):4,(1,0):74	0:74,1:4	18
ALE	9053@uc010kgr.1@uc003qha.1uc010kgq.1	ENSG00000135525	0.36	0.2	0.54	0.12	0.01	0.29	0.24	2.6	('9053@uc010kgr.1@uc003qha.1uc010kgq.1.A.0', '9053@uc010kgr.1@uc003qha.1uc010kgq.1.B.0')	(0,0):251,(0,1):10,(1,0):12	0:12,1:10	(0,0):119,(0,1):9,(1,0):1	0:1,1:9	6
ALE	23233@uc002sij.2@uc010fep.1	ENSG00000144036	0.53	0.05	0.97	0.04	0	0.28	0.49	2.57	('23233@uc002sij.2@uc010fep.1.A.0', '23233@uc002sij.2@uc010fep.1.B.0')	(0,0):744,(1,0):28	1904-01-01 00:28:00	(0,0):1335,(0,1):3,(1,0):11	0:11,1:3	2
ALE	256435@uc001dhg.2@uc001dhh.1	ENSG00000184005	0.63	0.47	0.78	0.36	0.17	0.59	0.27	2.57	('256435@uc001dhg.2@uc001dhh.1.B.0', '256435@uc001dhg.2@uc001dhh.1.A.0')	(0,0):413,(0,1):7,(1,0):340	0:340,1:7	(0,0):387,(0,1):4,(1,0):49	0:49,1:4	1
ALE	160335@uc001szs.1@uc001szt.1	ENSG00000252220,ENSG00000179104	0.85	0.63	0.96	0.56	0.37	0.75	0.29	2.55	('160335@uc001szs.1@uc001szt.1.B.0', '160335@uc001szs.1@uc001szt.1.A.0')	(0,0):279,(0,1):1,(1,0):47	0:47,1:1	(0,0):767,(0,1):6,(1,0):43	0:43,1:6	12
ALE	57545@uc003gnt.2uc01851.uc003gnx.1	ENSG00000048342	0.12	0.04	0.28	0.56	0.13	0.91	-0.44	2.54	('57545@uc003gnt.2uc01854.uc003gnx.1.A.0', '57545@uc003gnt.2uc01855.uc003gnx.1.B.0')	(0,0):682,(0,1):7,(1,0):10	0:10,1:7	(0,0):727,(1,0):5	1904-01-01 00:05:00	4
[truncated: 961 more rows]

## Sheet: dexseq
groupID	featureID	exonBaseMean	dispersion	stat	pvalue	padj	control	knockdown	log2fold_knockdown_control	genomicData.seqnames	genomicData.start	genomicData.end	genomicData.width	genomicData.strand	countData.34	countData.35	countData.36	transcripts
[truncated: 702 more rows]
