# Supplementary material for: Cross-talk between PRMT1-mediated methylation and ubiquitylation on RBM15 controls RNA splicing
Source: eLife journal article supplement (doi:10.7554/elife.07938), 2015-11-17
Supplement: supp [file elife-07938-supp-v1.zip › elife_poa_e07938_Figure_6_figure_supplement_1.pdf]

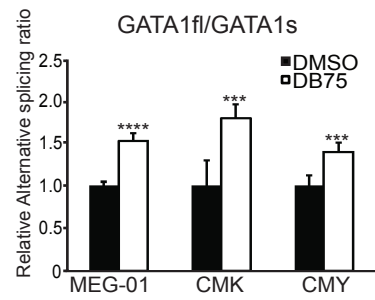

**Figure 6-figure supplement 1.** Alternative splicing of GATA1 is regulated by PRMT1 in acute megakaryoblastic leukemia cell lines.
