# Supplementary material for: Cross-talk between PRMT1-mediated methylation and ubiquitylation on RBM15 controls RNA splicing
Source: eLife journal article supplement (doi:10.7554/elife.07938), 2015-11-17
Supplement: supp [file elife-07938-supp-v1.zip › elife_poa_e07938_Figure_6_figure_supplement_3.pdf]

**A**

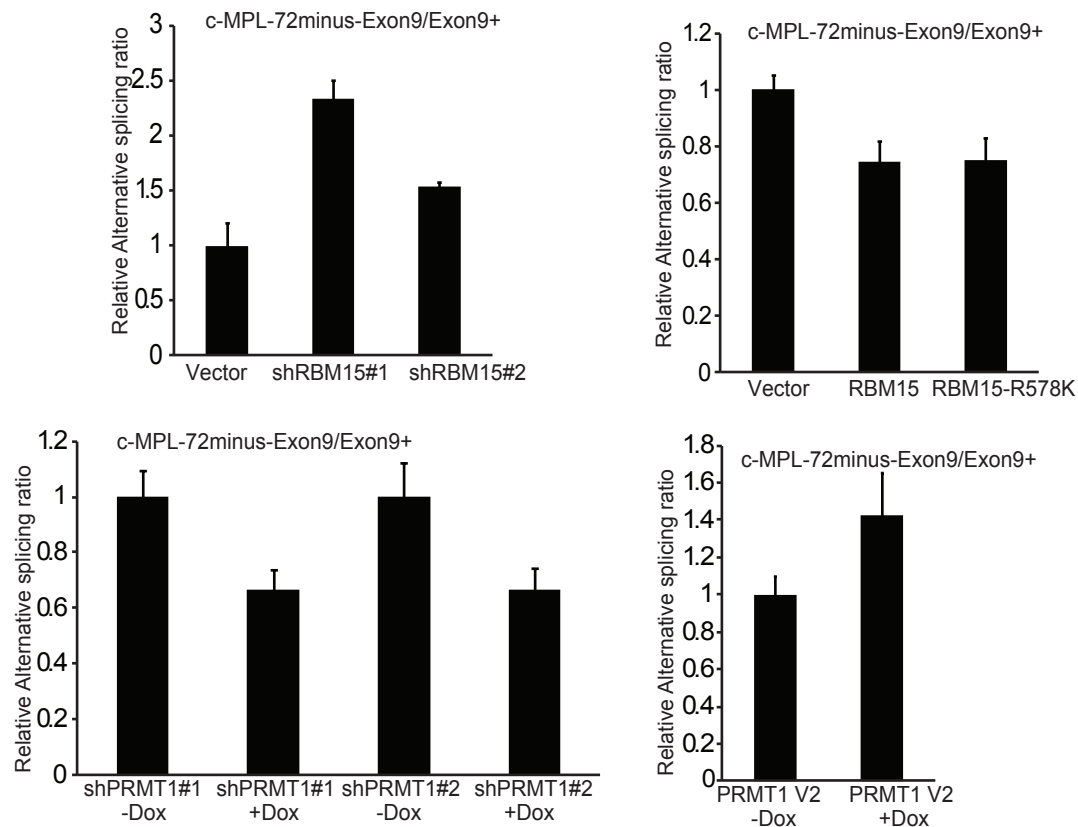

**B**

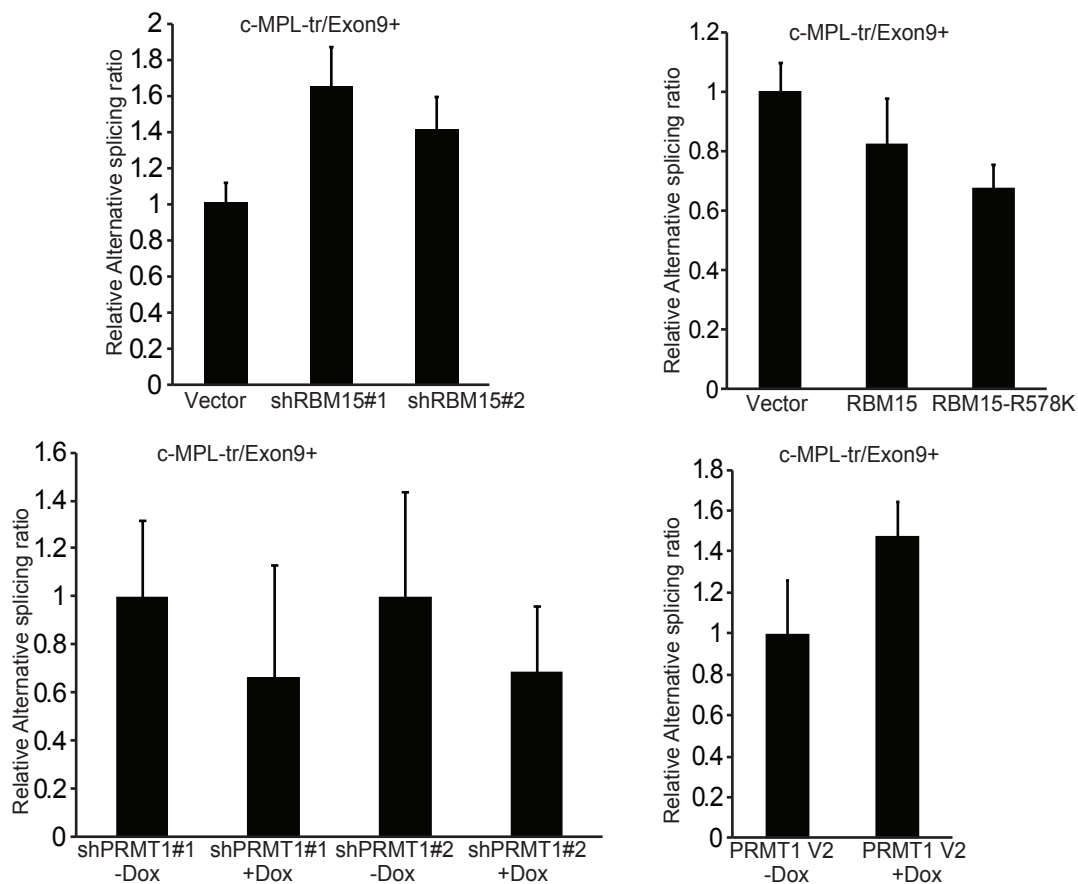

**Figure 6-figure supplement 3.** Alternative splicing of c-MPL is measured as the ratios of different isoforms by real-time PCR assays.
