# Supplementary material for: Cross-talk between PRMT1-mediated methylation and ubiquitylation on RBM15 controls RNA splicing
Source: eLife journal article supplement (doi:10.7554/elife.07938), 2015-11-17
Supplement: supp [file elife-07938-supp-v1.zip › elife_poa_e07938_Figure_7_source_data_1.xls]

## Sheet: mass spetrometry data
Accession	Description	Score	Coverage	# Proteins	# Unique Peptides	# Peptides	# PSMs	# AAs	MW [kDa]	calc. pI
IPI00102752.2	Isoform 1 of Putative RNA-binding protein 15	1457.65	77.58	7	81	101	754	977	107.124	10.0815
	A2	Sequence	# PSMs	# Proteins	# Protein Groups	Protein Group Accessions	Modifications	ΔCn	q-Value	PEP	XCorr	Probability	Charge	MH+ [Da]	ΔM [ppm]	RT [min]	# Missed Cleavages
	Low	RLPEESGGr	5	3	1	IPI00102752.2	R9(Methyl)	0	0.227039	1	0.884578	0	2	1014.53	0.0810005	24.4412	1
	Low	GFPLGGPDr	1	5	1	IPI00102752.2	R9(Methyl)	0.55			0.44894	0	2	929.488	4.59017	37.6376	0
	Low	SPELSSSrDR	4	3	1	IPI00102752.2	R8(Methyl)	0			0.768669	0	3	1147.55	-15.2793	19.4606	1
	Low	RVTQLrGDDLr	1	3	1	IPI00102752.2	R6(Methyl); R11(Dimethyl)	0			0.65112	0	3	1370.81	18.9962	35.957	2
	Low	IIIrNPIK	1	3	1	IPI00102752.2	R4(Methyl)	0	0.366448	1	1.05886	0	2	980.662	0.545181	30.474	1
	Low	TAATSVPAYEPLDSLDr	1	3	1	IPI00102752.2	R17(Methyl)	0			0.715808	0	2	1819.87	-19.8079	34.7987	0
	Low	GSLEKSQGDKr	1	3	1	IPI00102752.2	R11(Methyl)	0			0.651584	0	2	1218.64	-4.02889	26.4554	2
	Low	rVTQLr	2	3	1	IPI00102752.2	R1(Methyl); R6(Trimethyl)	0			0.83704	0	2	828.529	-14.9566	27.767	1
	Low	rSrGGEDSTSr	1	3	1	IPI00102752.2	R1(Dimethyl); R3(Dimethyl); R11(Methyl)	0.7206			0.56543	0	2	1277.66	1.12768	30.5683	2
	Low	rLPEESGGR	1	3	1	IPI00102752.2	R1(Dimethyl)	0.6118			0.591027	0	2	1028.54	-9.85446	26.7268	1
	Low	nSSGGGESrSSSR	1	3	1	IPI00102752.2	N-Term(Gln->pyro-Glu); R9(Methyl)	0			0.5348	0	2	1264.57	11.1128	17.2374	1
	Low	rSrGGEDSTSR	1	3	1	IPI00102752.2	N-Term(Gln->pyro-Glu); R3(Methyl)	0.588			0.893107	0	2	1204.56	-8.29861	20.0297	2
	Low	drrGSLEK	3	3	1	IPI00102752.2	N-Term(Gln->pyro-Glu); R2(Methyl); R3(Methyl)	0	0.525533	1	1.12933	0	2	971.529	1.8021	21.8217	2
	Low	aVPLcETSAGrR	1	3	1	IPI00102752.2	N-Term(Gln->pyro-Glu); C5(Carbamidomethyl); R11(Trimethyl)	0			0.737158	0	2	1341.67	-15.2187	29.37	1
	High	qDGGTAPVASASPK	23	3	1	IPI00102752.2	N-Term(Gln->pyro-Glu)	0	0	2.64704e-07	2.21779	0	2	1268.61	0.53764	22.2558	0
	High	qKQAAGVISLPVGGNK	2	3	1	IPI00102752.2	N-Term(Gln->pyro-Glu)	0	0	3.85401e-16	3.76594	0	2	1549.87	0.108619	31.8253	1
	High	qAAGVISLPVGGNKDK	3	3	1	IPI00102752.2	N-Term(Gln->pyro-Glu)	0	0	4.89033e-16	3.36339	0	2	1536.84	1.07167	32.7058	1
	High	qAAGVISLPVGGNK	16	3	1	IPI00102752.2	N-Term(Gln->pyro-Glu)	0	0	1.1069e-07	3.26152	0	2	1293.72	-0.918967	33.6382	0
	High	vAGPNGYAILLAVPGSSDSR	3	3	1	IPI00102752.2	N-Term(Gln->pyro-Glu)	0	0	1.71379e-07	2.31347	0	2	1926.99	0.533106	39.7805	0
	Low	rSRSPLDK	1	3	1	IPI00102752.2	N-Term(Gln->pyro-Glu)	0			0.645391	0	2	941.499	-18.4199	20.8191	2
	Low	rRLPEESGGR	1	3	1	IPI00102752.2	N-Term(Gln->pyro-Glu)	0.7458			0.606593	0	2	1139.58	-9.58793	25.7827	2
	Low	lGGSGGSNGSSSGK	1	3	1	IPI00102752.2	N-Term(Gln->pyro-Glu)	0	0.053415	0.498415	0.879992	0	2	1134.5	0.656663	16.3874	0
	Low	lPPPPPPPLPR	1	3	1	IPI00102752.2	N-Term(Gln->pyro-Glu)	0.3917			0.730828	0	2	1160.68	-0.987477	48.4298	0
	High	SEEDYLVmIIVR	11	3	1	IPI00102752.2	M8(Oxidation)	0	0	6.84291e-16	3.2117	0	2	1482.75	-1.58054	40.826	0
	High	NSNFPSNmHLLQGDLQVASSLLVEGSTGGK	9	3	1	IPI00102752.2	M8(Oxidation)	0	0	3.85401e-16	4.94904	0	3	3116.53	0.740086	42.0446	0
	High	FENLDmSHR	9	3	1	IPI00102752.2	M6(Oxidation)	0	0	0.00017072	2.35192	0	2	1164.51	-1.14002	25.1148	0
	Low	RPATmK	2	3	1	IPI00102752.2	M5(Oxidation)	0	0.612135	1	1.35121	0	2	719.386	-1.82047	14.8099	0
	High	RAVPLcETSAGR	2	3	1	IPI00102752.2	C6(Carbamidomethyl)	0	0	0.00017072	1.54502	0	2	1316.67	-0.940408	24.7782	1
	Low	AVPLcETSAGRR	1	3	1	IPI00102752.2	C5(Carbamidomethyl)	0.1941			1.37168	0	3	1316.67	-0.324819	24.8096	1
	High	AVPLcETSAGR	2	3	1	IPI00102752.2	C5(Carbamidomethyl)	0	0	7.5324e-05	2.27185	0	2	1160.57	-1.02745	25.1214	0
	High	DKENTGVLHAFPPcEFSQQFLDSPAK	17	3	1	IPI00102752.2	C14(Carbamidomethyl)	0	0	3.85401e-16	6.57428	0	3	2962.4	-2.37897	38.0485	1
	High	ENTGVLHAFPPcEFSQQFLDSPAK	2	3	1	IPI00102752.2	C12(Carbamidomethyl)	0	0	3.85401e-16	3.9979	0	3	2719.28	-0.649304	38.6739	0
	High	NSASAER	8	3	1	IPI00102752.2		0	0.000208	0.00134429	1.74576	0	2	734.34	-3.28413	14.5318	0
	High	KNSASAER	6	3	1	IPI00102752.2		0	0.000397	0.00308172	2.06948	0	2	862.437	-0.884723	14.7655	1
	Medium	YENKKR	1	1	1	IPI00102752.2		0	0.035912	0.42165	1.60687	0	2	837.459	1.16483	15.1649	2
	Low	KNSASAERDR	5	3	1	IPI00102752.2		0	0.123929	1	1.04933	0	3	1133.57	1.21038	15.1967	2
	Medium	NSASAERDR	3	3	1	IPI00102752.2		0	0.01947	0.171734	2.2258	0	2	1005.47	3.10728	16.0497	1
	High	YNSDNDR	6	3	1	IPI00102752.2		0	0.000208	0.000522617	1.81446	0	2	883.355	0.530349	16.1752	0
	High	TTAPTEGK	8	3	1	IPI00102752.2		0	0.000208	0.00017072	2.27496	0	2	804.409	-1.48477	16.6586	0
	High	SDGSAPSTSTASSK	20	3	1	IPI00102752.2		0	0	4.08372e-16	3.761	0	2	1282.57	-0.610124	17.2341	0
	High	LKSPSQK	19	3	1	IPI00102752.2		0	0.002324	0.0232973	2.18169	0	2	787.467	-0.839359	18.1298	1
	High	EDRSDGSAPSTSTASSK	4	3	1	IPI00102752.2		0	0	3.85401e-16	3.13146	0	2	1682.74	-2.36047	17.6783	1
	High	KEDRSDGSAPSTSTASSK	1	3	1	IPI00102752.2		0	0	8.88867e-10	2.67375	0	3	1810.84	-0.683783	17.7508	2
	High	DRYNSDNDR	7	3	1	IPI00102752.2		0	0	5.37599e-05	2.83053	0	2	1154.48	-2.88783	18.2931	1
	High	SPLKKEDR	2	3	1	IPI00102752.2		0	0.005347	0.0629633	1.88238	0	2	972.548	0.782446	19.4559	2
	High	QDGGTAPVASASPK	15	3	1	IPI00102752.2		0	0	2.97953e-15	2.90838	0	2	1285.64	-0.370492	20.8473	0
	Medium	LDEVTR	17	6	1	IPI00102752.2		0	0.015729	0.157128	1.72906	0	2	732.389	0.218796	21.7147	0
	High	SSSSSAASDTATSTQRPLR	31	3	1	IPI00102752.2		0	0	7.08642e-07	1.91198	0	3	1909.92	-2.36829	21.422	0
	High	RLPEESGGR	18	3	1	IPI00102752.2		0	0	5.79623e-05	2.06677	0	2	1000.52	0.41214	21.6917	1
	High	LKSPSQKQDGGTAPVASASPK	1	3	1	IPI00102752.2		0	0	4.78386e-16	3.07447	0	3	2054.09	0.70358	22.5792	2
	High	TTAPTEGKSPLK	1	3	1	IPI00102752.2		0	0.000208	0.00017072	1.57129	0	2	1229.67	0.0832363	23.0405	1
	High	LRLDQPK	19	7	1	IPI00102752.2		0	0.009634	0.0919447	2.05419	0	2	869.519	-1.26234	25.1969	1
	High	LRLDQPKLDEVTR	1	6	1	IPI00102752.2		0	0	9.59755e-07	2.51187	0	2	1582.89	-0.957277	30.5232	2
	High	QAAGVISLPVGGNK	16	3	1	IPI00102752.2		0	0	0.00017072	2.19861	0	2	1310.74	0.258091	33.7704	0
	High	LLLERPSPIR	27	3	1	IPI00102752.2		0	0	0.00017072	1.80808	0	3	1193.74	-0.269415	32.539	0
	High	NLVSYLK	16	7	1	IPI00102752.2		0	0.000746	0.00699384	1.96984	0	2	836.487	-0.284498	34.1858	0
	High	GFGFQIGVR	17	1	1	IPI00102752.2		0	0.000208	0.00125942	2.16563	0	2	980.531	-0.170119	36.795	0
	High	VAGPNGYAILLAVPGSSDSR	13	3	1	IPI00102752.2		0	0	3.85401e-16	3.65078	0	2	1944.02	-1.38608	38.1633	0
	High	IKVAGPNGYAILLAVPGSSDSR	1	3	1	IPI00102752.2		0	0.006164	0.0734623	1.74751	0	3	2185.19	-3.8478	38.2548	1
	High	LPEESGGR	8	3	1	IPI00102752.2		0	0.000397	0.00314425	1.76946	0	2	844.415	-1.5536	20.4998	0
	High	GDRDLPSSR	7	3	1	IPI00102752.2		0	0.000208	0.00165693	1.91221	0	2	1002.49	-1.48798	21.0784	1
	High	DRGDRDLPSSR	11	3	1	IPI00102752.2		0	0	0.00017072	1.79861	0	3	1273.62	-1.02837	21.584	2
	Medium	RRLPEESGGR	1	3	1	IPI00102752.2		0	0.03223	0.386268	0.871761	0	2	1156.62	-0.527392	21.7325	2
	High	DGWSLDR	3	3	1	IPI00102752.2		0	0.00107	0.0100895	1.33477	0	2	848.389	-0.352909	30.7284	0
	High	TAATSVPAYEPLDSLDR	10	3	1	IPI00102752.2		0	0	3.85401e-16	3.41688	0	2	1805.89	0.398852	34.7844	0
	Low	TIDYRK	5	3	1	IPI00102752.2		0	0.098316	1	0.962296	0	2	795.437	0.855846	22.083	1
	High	VDFADTEHR	10	3	1	IPI00102752.2		0	0	0.000117377	2.5186	0	2	1089.5	0.119366	25.4615	0
	High	IEAVYVSR	8	3	1	IPI00102752.2		0	0	0.00017072	2.44627	0	2	936.515	-0.00119926	27.9404	0
	Low	RPEDARAAK	1	3	1	IPI00102752.2		0			0.590442	0	2	1013.54	-6.18057	28.0768	1
	High	LRVDFADTEHR	14	3	1	IPI00102752.2		0	0	2.22738e-14	3.50637	0	3	1358.68	0.123871	29.8065	1
	High	GFPLGGPDR	19	5	1	IPI00102752.2		0	0.001552	0.0146411	1.48159	0	2	915.468	-0.845911	30.7956	0
	High	DRTPPLLYR	11	3	1	IPI00102752.2		0	0	0.00017072	2.88384	0	2	1130.63	2.20369	31.1085	1
	High	VAFVNFR	9	3	1	IPI00102752.2		0	0.000208	0.000758266	1.99755	0	2	852.472	-0.343269	34.191	0
	High	YQQQYLQPLPLTHYELVTDAFGHR	12	3	1	IPI00102752.2		0	0	3.85401e-16	5.54886	0	4	2917.46	-0.482818	40.2866	0
	High	LWVGGLGPWVPLAALAR	8	3	1	IPI00102752.2		0	0	3.85401e-16	4.79624	0	2	1776.03	-3.23114	47.5796	0
	High	ISHLSGSGSGDER	10	3	1	IPI00102752.2		0	0	4.29356e-16	3.34799	0	2	1301.61	-0.571521	21.5521	0
	High	LHSYSSPSTK	6	3	1	IPI00102752.2		0	0	2.37946e-06	2.66142	0	2	1106.55	0.3072	21.9085	0
	High	EVDEISPEDDQR	5	3	1	IPI00102752.2		0	0	3.61307e-11	3.25051	0	2	1431.62	-1.54921	25.0544	0
	High	FGDVSVK	6	3	1	IPI00102752.2		0	0.000746	0.00651165	2.04103	0	2	751.398	-0.698009	26.4717	0
	High	VGAGAGAAPFR	7	3	1	IPI00102752.2		0	0	2.39932e-10	2.18532	0	2	973.52	-1.99635	27.8402	0
	High	VRPAYSLEPR	13	3	1	IPI00102752.2		0	0	0.000127169	2.84273	0	2	1187.65	-3.13193	28.7315	0
	High	GFPLGGPDRR	8	5	1	IPI00102752.2		0	0.000208	0.000268189	2.17897	0	2	1071.57	0.601601	29.2441	1
	High	LQQLALGR	8	3	1	IPI00102752.2		0	0.000208	0.000560901	2.44018	0	2	898.546	-0.609894	29.3632	0
	High	SLSPGGAALGYR	5	3	1	IPI00102752.2		0	0	2.29146e-07	2.98648	0	2	1148.61	2.42805	30.0044	0
	Medium	IIIRNPIK	3	3	1	IPI00102752.2		0	0.01287	0.108024	1.98716	0	2	966.646	0.263243	30.2215	1
	High	ERDYPFYER	10	3	1	IPI00102752.2		0	0	4.09766e-07	3.27495	0	2	1274.58	-0.236774	30.3819	1
	High	LPPPPPPPLPR	28	3	1	IPI00102752.2		0	0	2.32478e-08	2.83488	0	2	1177.71	0.841783	30.9576	0
	Medium	DYPFYER	5	3	1	IPI00102752.2		0	0.015074	0.154447	1.515	0	2	989.437	0.910743	31.6816	0
	High	GQTSTYGFLK	7	3	1	IPI00102752.2		0	0	0.00017072	2.42546	0	2	1101.56	1.78342	31.8968	0
	High	LVLYDRPLK	11	3	1	IPI00102752.2		0	0	0.000120436	2.50347	0	2	1116.68	0.380427	31.9527	0
	High	VGAGAGAAPFREVDEISPEDDQR	8	3	1	IPI00102752.2		0	0	3.85401e-16	4.60051	0	3	2386.12	-0.891899	32.321	1
	High	FGVITEVDIK	8	3	1	IPI00102752.2		0	0	3.68063e-08	2.75898	0	2	1120.62	-0.749818	35.4357	0
	High	LRVDFADTEHRYQQQYLQPLPLTHYELVTDAFGHR	1	3	1	IPI00102752.2		0	0	3.85401e-16	3.26547	0	4	4257.13	0.000385916	40.1684	2
	Low	SQGDKRDR	1	3	1	IPI00102752.2		0.592			0.710415	0	2	961.486	4.73327	25.1837	2
	High	GGEDSTSR	2	3	1	IPI00102752.2		0	0.00107	0.0110373	1.16786	0	2	808.341	-2.42123	14.3356	0
	High	SRGGEDSTSR	2	3	1	IPI00102752.2		0	0.008115	0.0887099	1.23067	0	2	1051.48	0.720016	15.3737	1
	High	HPPGGGGGQR	7	3	1	IPI00102752.2		0	0.000208	0.00017072	2.25218	0	2	919.449	-0.214282	16.0466	0
	High	LGGSGGSNGSSSGK	1	3	1	IPI00102752.2		0	0	4.88005e-16	3.41533	0	2	1151.53	0.595073	15.7484	0
	Medium	RPEDAR	3	3	1	IPI00102752.2		0	0.034048	0.414033	1.87984	0	2	743.38	0.0577098	16.1312	0
	Low	GGEDSTSRGER	1	3	1	IPI00102752.2		0	0.092587	1	1.63623	0	2	1150.51	0.607993	16.0871	1
	Low	ERSPVK	1	3	1	IPI00102752.2		0			0.610512	0	2	715.408	-1.84156	18.0025	1
	High	EYDTGGGSSSSR	3	3	1	IPI00102752.2		0	0	1.48472e-09	2.52293	0	2	1202.49	-1.46307	18.281	0
	Low	RPATMK	1	3	1	IPI00102752.2		0	0.446213	1	1.09645	0	2	703.39	-3.36414	18.382	0
	Low	DLERER	1	3	1	IPI00102752.2		0.0244			0.797319	0	2	817.412	-5.36873	19.9808	1
	High	SSGAASSAPGGGDGAEYK	6	3	1	IPI00102752.2		0	0	3.85401e-16	4.11867	0	2	1568.68	0.167967	21.5314	0
	High	TAGRDPVPR	3	3	1	IPI00102752.2		0	0.004205	0.0490624	2.69156	0	2	968.528	0.701441	21.8675	1
	Low	RVTQLR	2	3	1	IPI00102752.2		0	0.053729	0.503108	1.86228	0	2	772.48	0.996171	22.3642	1
	Low	VTQLRGDDLR	1	3	1	IPI00102752.2		0	0.14539	1	1.42552	0	2	1172.64	0.694489	25.9286	1
	Low	RFGDVSVK	1	3	1	IPI00102752.2		0	0.469723	1	1.09381	0	2	907.499	-0.695647	27.1021	1
	High	FENLDMSHR	2	3	1	IPI00102752.2		0	0	2.67556e-07	2.50544	0	2	1148.52	0.156052	27.8471	0
	Low	DGWSLDRDR	1	3	1	IPI00102752.2		0	0.299705	1	1.02978	0	2	1119.52	-0.937966	29.4581	1
	High	TAATSVPAYEPLDSLDRR	1	3	1	IPI00102752.2		0	0	1.03881e-15	2.85362	0	3	1961.99	-0.534115	33.7277	1
	High	DRDRDLYPDSDWVPPPPPVR	1	3	1	IPI00102752.2		0	0	3.85401e-16	3.74303	0	3	2392.16	-1.82254	34.3891	2
	High	LVLYDRPLKIEAVYVSR	1	3	1	IPI00102752.2		0	0	0.00017072	1.60535	0	3	2034.18	1.68787	37.3247	1
	High	ISELGSQLSDEAVEDGLFHEFKR	9	3	1	IPI00102752.2		0	0	3.85401e-16	5.81565	0	3	2606.27	-1.19461	39.4359	1
	High	ISELGSQLSDEAVEDGLFHEFK	2	3	1	IPI00102752.2		0	0	4.51899e-15	2.35087	0	3	2450.17	-1.4015	40.7246	0
	High	TLFLGNLDITVTESDLRR	1	3	1	IPI00102752.2		0	0	1.38065e-15	2.84834	0	3	2063.11	-0.999524	40.8882	1
	High	SEEDYLVMIIVR	1	3	1	IPI00102752.2		0	0	7.33456e-14	2.80134	0	2	1466.76	0.428221	43.508	0
IPI00604620.3	Nucleolin	343.844	55.07	7	52	57	210	710	76.5684	4.70361
	A2	Sequence	# PSMs	# Proteins	# Protein Groups	Protein Group Accessions	Modifications	ΔCn	q-Value	PEP	XCorr	Probability	Charge	MH+ [Da]	ΔM [ppm]	RT [min]	# Missed Cleavages
	Low	IVTDrETGSSK	1	4	1	IPI00604620.3	R5(Dimethyl)	0.655			0.593334	0	2	1220.65	4.96545	27.3471	1
	Low	KErDAr	1	2	1	IPI00604620.3	R3(Trimethyl); R6(Dimethyl)	0			0.426591	0	2	844.49	-11.6904	17.9166	2
	Low	GrGGFGGR	1	3	1	IPI00604620.3	R2(Trimethyl)	0.4407			0.985174	0	2	805.43	-15.5406	27.5037	1
	High	qKVEGTEPTTAFNLFVGNLNFNK	2	2	1	IPI00604620.3	N-Term(Gln->pyro-Glu)	0	0	3.85401e-16	3.89485	0	3	2551.27	-3.31408	43.1357	1
	Medium	qGTEIDGR	2	4	1	IPI00604620.3	N-Term(Gln->pyro-Glu)	0	0.031472	0.369344	2.02374	0	2	858.397	1.51407	22.5795	0
	Low	IGmTrK	1	2	1	IPI00604620.3	M3(Oxidation); R5(Dimethyl)	0.0339			0.567149	0	2	749.422	-15.9372	24.9145	1
	High	EAmEDGEIDGNK	4	4	1	IPI00604620.3	M3(Oxidation)	0	0	2.1015e-09	2.50344	0	2	1323.54	-0.885582	20.9445	0
	High	KmAPPPK	1	3	1	IPI00604620.3	M2(Oxidation)	0	0.000208	0.000441387	2.18833	0	2	784.438	-0.208014	15.8564	1
	High	EALNScNKR	6	4	1	IPI00604620.3	C6(Carbamidomethyl)	0	0	0.000141617	2.58569	0	3	1091.53	-0.742085	18.9714	1
	High	EALNScNK	2	4	1	IPI00604620.3	C6(Carbamidomethyl)	0	0.000208	0.000215446	1.95407	0	2	935.424	-1.09623	18.4808	0
	High	GYAFIEFASFEDAKEALNScNKR	1	4	1	IPI00604620.3	C20(Carbamidomethyl)	0	0	1.2583e-12	3.09336	0	3	2667.25	-0.505925	40.8067	2
	High	GQNQDYR	6	4	1	IPI00604620.3		0	0.002783	0.0285553	1.33488	0	2	880.39	-0.89743	18.1091	0
	High	LELQGPR	9	4	1	IPI00604620.3		0	0.001402	0.0132505	1.98015	0	2	812.463	-0.012705	26.8557	0
	High	NDLAVVDVR	12	2	1	IPI00604620.3		0	0	4.27024e-05	3.0267	0	2	1000.54	0.164608	30.7487	0
	High	SISLYYTGEK	10	4	1	IPI00604620.3		0	0	5.27904e-06	1.7533	0	2	1160.58	0.333051	31.7221	0
	High	TGISDVFAK	11	2	1	IPI00604620.3		0	0	2.45424e-05	2.20079	0	2	937.498	-0.73997	32.1863	0
	High	ALELTGLK	8	2	1	IPI00604620.3		0	0	0.00017072	2.19931	0	2	844.513	-0.564825	32.6115	0
	High	GIAYIEFK	7	4	1	IPI00604620.3		0	0.000208	0.000491332	2.14355	0	2	940.513	-0.561435	34.9678	0
	High	TLVLSNLSYSATEETLQEVFEK	4	4	1	IPI00604620.3		0	0	4.02059e-15	3.24312	0	3	2501.26	-3.33866	45.3279	0
	High	IVTDRETGSSK	10	4	1	IPI00604620.3		0	0	1.53871e-13	2.97966	0	2	1192.62	-0.300703	19.4086	1
	High	VFGNEIK	5	2	1	IPI00604620.3		0	0.002324	0.0225969	1.33677	0	2	806.44	-0.302581	27.9444	0
	High	EVFEDAAEIR	3	3	1	IPI00604620.3		0	0	2.68554e-05	2.16268	0	2	1178.57	0.546685	31.1983	0
	High	GFGFVDFNSEEDAK	3	4	1	IPI00604620.3		0	0	3.85401e-16	3.98374	0	2	1561.68	-0.248399	37.1367	0
	High	VTQDELKEVFEDAAEIR	9	3	1	IPI00604620.3		0	0	3.85401e-16	4.67055	0	3	1991.99	-1.21089	40.3707	1
	High	VPQNQNGK	2	4	1	IPI00604620.3		0	0.000208	0.00017072	1.27766	0	2	884.456	-2.35607	14.484	0
	High	TEADAEK	3	4	1	IPI00604620.3		0	0.000397	0.00369086	1.93055	0	2	763.345	-2.36061	14.6889	0
	High	AAATPAKK	5	5	1	IPI00604620.3		0	0.000208	0.000804299	2.25429	0	2	757.457	0.243503	14.995	1
	High	VAVATPAK	5	5	1	IPI00604620.3		0	0.000208	0.00233293	1.83869	0	2	756.462	0.742134	21.6716	0
	High	ALVATPGKK	4	5	1	IPI00604620.3		0	0.000917	0.00808957	1.86678	0	2	884.557	0.152453	23.1844	1
	High	ALVATPGK	5	5	1	IPI00604620.3		0	0.00107	0.0111892	1.74596	0	2	756.461	-0.710197	24.319	0
	High	VEGTEPTTAFNLFVGNLNFNK	5	2	1	IPI00604620.3		0	0	3.85401e-16	4.7275	0	3	2312.15	-1.10195	43.6076	0
	High	KAAVTPGKK	3	5	1	IPI00604620.3		0	0	5.841e-06	2.79743	0	2	899.566	-1.45036	17.3825	2
	High	AVTTPGKK	4	5	1	IPI00604620.3		0	0.005347	0.0618619	1.59617	0	2	801.482	-0.716044	18.173	1
	High	KGAAIPAK	4	5	1	IPI00604620.3		0	0.000208	0.000252132	2.74944	0	2	755.476	-1.43663	20.5018	1
	High	VAVATPAKK	4	5	1	IPI00604620.3		0	0.000208	0.000382126	2.31172	0	2	884.555	-1.91758	20.4846	1
	Low	LELQGPRGSPNAR	1	4	1	IPI00604620.3		0.6794			0.915026	0	2	1394.75	0.061874	25.1306	1
	Medium	KAAATPAK	2	5	1	IPI00604620.3		0	0.040986	0.436118	1.39503	0	2	757.457	-0.0788129	15.645	1
	High	LVSKDGK	1	2	1	IPI00604620.3		0	0.002007	0.0222558	1.32354	0	2	746.441	-0.245135	16.2447	1
	High	AAVTPGKK	3	5	1	IPI00604620.3		0	0.003051	0.0328704	1.19996	0	2	771.472	-0.268017	17.2441	1
	High	KAAVTPGK	1	5	1	IPI00604620.3		0	0.003188	0.0380625	2.09756	0	2	771.472	-0.821824	17.7575	1
	Low	REIEGR	1	4	1	IPI00604620.3		0	0.155239	1	1.46755	0	2	759.41	-0.571951	18.9647	1
	High	QGTEIDGR	4	4	1	IPI00604620.3		0	0.000208	0.000771066	2.54353	0	2	875.422	-0.256919	20.5256	0
	High	KVAVATPAKK	1	5	1	IPI00604620.3		0	0	2.40587e-08	2.34147	0	2	1012.65	-0.288045	20.6123	2
	High	KVVVSPTKK	2	5	1	IPI00604620.3		0	0	0.00017072	2.83071	0	2	985.64	-0.311455	20.9054	2
	High	VVVSPTK	1	5	1	IPI00604620.3		0	0.00107	0.0118615	1.51064	0	2	729.45	-0.17175	21.2754	0
	High	KVAVATPAK	2	5	1	IPI00604620.3		0	0.000208	0.00017072	2.7418	0	2	884.557	0.290455	21.5722	1
	High	KVVVSPTK	1	5	1	IPI00604620.3		0	0.00107	0.0117831	2.7063	0	2	857.546	0.424119	21.5589	1
	High	VTQDELK	1	3	1	IPI00604620.3		0	0.00107	0.0104901	1.80029	0	2	832.442	0.631461	21.8095	0
	High	NSTWSGESK	1	3	1	IPI00604620.3		0	0.000746	0.00646505	1.60903	0	2	995.444	1.05982	22.1192	0
	High	EAMEDGEIDGNK	1	4	1	IPI00604620.3		0	0	2.86854e-09	2.14269	0	2	1307.54	0.349333	23.9875	0
	High	ESFDGSVR	3	4	1	IPI00604620.3		0	0.000208	0.000662433	1.83198	0	2	896.41	-1.23236	25.0077	0
	High	TEADAEKTFEEK	3	4	1	IPI00604620.3		0	0	6.90164e-11	2.46381	0	2	1397.64	-0.550725	25.2415	1
	High	GLSEDTTEETLK	2	4	1	IPI00604620.3		0	0	1.63036e-13	3.06347	0	2	1322.63	-0.362787	26.7929	0
	High	VFGNEIKLEKPK	2	2	1	IPI00604620.3		0	0	4.58868e-07	2.71769	0	3	1401.81	-0.245573	30.443	1
	High	VTLDWAKPK	1	4	1	IPI00604620.3		0	0	0.00017072	1.96309	0	2	1057.61	2.25189	31.4013	0
	High	GIAYIEFKTEADAEK	1	4	1	IPI00604620.3		0	0	1.21178e-15	3.13024	0	2	1684.84	1.17217	33.8036	1
	High	GLSEDTTEETLKESFDGSVR	4	4	1	IPI00604620.3		0	0	3.85401e-16	5.49053	0	3	2200.02	-0.128984	34.1492	1
	High	KFGYVDFESAEDLEK	3	2	1	IPI00604620.3		0	0	3.85401e-16	4.06089	0	2	1776.83	-1.75248	35.8082	1
	High	FGYVDFESAEDLEK	2	2	1	IPI00604620.3		0	0	3.85401e-16	3.04063	0	2	1648.74	-0.926556	37.1764	0
	High	GYAFIEFASFEDAK	2	4	1	IPI00604620.3		0	0	1.1013e-15	3.65402	0	2	1594.74	-1.98521	41.6769	0
	High	QKVEGTEPTTAFNLFVGNLNFNK	1	2	1	IPI00604620.3		0	0	2.98401e-10	2.72067	0	3	2568.31	-0.772532	42.167	1
IPI00003865.1	Isoform 1 of Heat shock cognate 71 kDa protein	285.041	56.97	21	33	43	142	646	70.8542	5.51611
	A2	Sequence	# PSMs	# Proteins	# Protein Groups	Protein Group Accessions	Modifications	ΔCn	q-Value	PEP	XCorr	Probability	Charge	MH+ [Da]	ΔM [ppm]	RT [min]	# Missed Cleavages
	Low	LSKEDIEr	2	6	1	IPI00003865.1	R8(Methyl)	0.3017			1.62126	0	2	1003.54	-1.0784	23.6146	1
	High	FELTGIPPAPr	8	6	1	IPI00003865.1	R11(Methyl)	0	0	0.00017072	2.48801	0	2	1211.68	-0.469866	34.6745	0
	High	qTQTFTTYSDNQPGVLIQVYEGER	1	6	1	IPI00003865.1	N-Term(Gln->pyro-Glu)	0	0	4.77391e-13	2.58395	0	3	2757.3	-0.680836	38.936	0
	High	NQVAmNPTNTVFDAKR	3	11	1	IPI00003865.1	M5(Oxidation)	0	0	3.85401e-16	3.7689	0	3	1821.89	-0.885734	28.2488	1
	High	NQVAmNPTNTVFDAK	3	11	1	IPI00003865.1	M5(Oxidation)	0	0	3.85401e-16	3.59754	0	2	1665.79	-0.200373	29.2595	0
	High	HWPFmVVNDAGRPK	1	12	1	IPI00003865.1	M5(Oxidation)	0	0	4.51212e-16	2.95731	0	3	1669.83	0.420703	34.2696	0
	High	RFDDAVVQSDmK	2	13	1	IPI00003865.1	M11(Oxidation)	0	0	1.95781e-05	2.75604	0	2	1426.66	-1.06375	26.1407	1
	High	NSLESYAFNmK	3	6	1	IPI00003865.1	M10(Oxidation)	0	0	1.01313e-05	2.79692	0	2	1319.59	0.831968	31.5363	0
	High	SFYPEEVSSmVLTK	3	12	1	IPI00003865.1	M10(Oxidation)	0	0	7.92481e-15	2.58905	0	2	1632.78	-0.807641	34.441	0
	High	mVQEAEK	5	14	3	IPI00003865.1;IPI00304925.5;IPI00911039.1	M1(Oxidation)	0	0.000397	0.00398001	1.24418	0	2	850.398	-0.0444072	16.3719	0
	High	mVQEAEKYK	1	14	3	IPI00003865.1;IPI00304925.5;IPI00911039.1	M1(Oxidation)	0	0.000208	0.00017072	1.52979	0	2	1141.56	0.31855	21.3315	1
	High	mKEIAEAYLGK	4	12	1	IPI00003865.1	M1(Oxidation)	0	0	1.25854e-10	3.31678	0	2	1268.66	0.0953349	29.1631	1
	High	mVNHFIAEFKR	2	5	1	IPI00003865.1	M1(Oxidation)	0	0	5.589e-10	3.19145	0	2	1407.72	0.105286	32.346	1
	High	mVNHFIAEFK	4	5	1	IPI00003865.1	M1(Oxidation)	0	0	3.14446e-06	4.11458	0	2	1251.62	0.0574646	33.6431	0
	High	VcNPIITK	4	5	1	IPI00003865.1	C2(Carbamidomethyl)	0	0.000208	0.00017072	2.209	0	2	944.523	-0.0447544	27.0384	0
	Low	KDISENK	1	6	1	IPI00003865.1		0.342			1.52371	0	2	833.438	2.22894	15.8601	1
	Medium	KDISENKR	2	6	1	IPI00003865.1		0	0.010452	0.0919447	1.51219	0	2	989.537	-0.327756	17.3002	2
	High	YKAEDEK	1	6	1	IPI00003865.1		0	0.001552	0.0156794	1.61004	0	2	882.42	0.028807	17.6904	1
	Medium	DISENKR	4	6	1	IPI00003865.1		0	0.029694	0.350292	1.64996	0	2	861.442	-0.73157	17.7933	1
	High	YKAEDEKQR	4	6	1	IPI00003865.1		0	0	5.57751e-13	2.97635	0	3	1166.58	-1.92687	18.1448	2
	High	NTTIPTK	3	12	2	IPI00003865.1;IPI00007765.5		0	0.000746	0.00734333	2.04927	0	2	774.436	0.201798	21.3716	0
	Low	RNTTIPTK	1	8	1	IPI00003865.1		0.0738			1.38224	0	2	930.536	-0.405984	21.2194	1
	High	NQTAEKEEFEHQQK	1	6	1	IPI00003865.1		0	0.002007	0.0217154	1.34628	0	3	1745.81	1.79035	22.6867	1
	High	ITITNDKGR	3	22	3	IPI00003865.1;IPI00304925.5;IPI00911039.1		0	0.000208	0.00017072	2.4185	0	2	1017.57	-0.607789	23.1232	1
	High	VQVEYKGETK	7	12	1	IPI00003865.1		0	0.000208	0.000170896	2.24863	0	2	1180.62	-0.391636	23.0887	1
	High	LSKEDIER	3	6	1	IPI00003865.1		0	0.000208	0.000174028	2.06523	0	2	989.526	-0.0815081	23.4349	1
	High	ITITNDK	1	22	3	IPI00003865.1;IPI00304925.5;IPI00911039.1		0	0.002927	0.0301578	2.03616	0	2	804.446	-0.122792	23.1952	0
	Medium	VQVEYK	1	12	1	IPI00003865.1		0	0.019218	0.171734	1.44325	0	2	765.414	-0.69176	23.5739	0
	High	GTLDPVEK	2	6	1	IPI00003865.1		0	0.002324	0.0230233	2.0247	0	2	858.456	-0.494927	24.827	0
	High	DNNLLGK	3	10	1	IPI00003865.1		0	0.001552	0.0159248	2.09307	0	2	773.415	-0.187013	25.4054	0
	High	VEIIANDQGNR	4	33	4	IPI00304925.5;IPI00911039.1;IPI00003362.3;IPI00003865.1		0	0	1.95281e-12	2.95992	0	2	1228.63	-0.00158179	25.8498	0
	High	STAGDTHLGGEDFDNR	6	5	1	IPI00003865.1		0	0	1.64724e-14	2.74196	0	3	1691.73	0.76937	26.7626	0
	High	EIAEAYLGK	3	12	1	IPI00003865.1		0	0.000208	0.00017072	2.14793	0	2	993.526	0.995792	29.5921	0
	High	SQIHDIVLVGGSTR	6	6	1	IPI00003865.1		0	0	1.48011e-14	3.86737	0	2	1481.81	0.607162	31.6238	0
	High	TTPSYVAFTDTER	3	29	3	IPI00003865.1;IPI00304925.5;IPI00911039.1		0	0	1.52711e-15	3.33393	0	2	1487.7	-0.22583	31.9865	0
	High	LDKSQIHDIVLVGGSTR	2	6	1	IPI00003865.1		0	0	3.85401e-16	3.70261	0	3	1838.01	0.949065	32.6299	1
	Low	FELTGIPPAPR	9	6	1	IPI00003865.1		0.4751			1.36922	0	2	1197.66	-0.352567	34.832	0
	High	NSLESYAFNMK	1	6	1	IPI00003865.1		0	0	2.7433e-10	2.50791	0	2	1303.6	-0.0620503	34.7953	0
	High	TVTNAVVTVPAYFNDSQR	4	9	1	IPI00003865.1		0	0	3.18409e-10	3.41298	0	3	1982	0.454649	34.9453	0
	High	DAGTIAGLNVLR	4	11	1	IPI00003865.1		0	0	1.85235e-09	3.14319	0	2	1199.67	-1.19377	35.0877	0
	High	IINEPTAAAIAYGLDKK	4	7	1	IPI00003865.1		0	0	3.85401e-16	4.32057	0	3	1787.99	-1.32727	35.3163	1
	High	LLQDFFNGK	2	10	1	IPI00003865.1		0	0	0.000109258	2.24941	0	2	1081.57	-0.946137	36.4959	0
	High	IINEPTAAAIAYGLDK	3	15	2	IPI00003362.3;IPI00003865.1		0	0	3.85401e-16	3.72199	0	2	1659.89	-0.208592	36.5328	0
	High	ARFEELNADLFR	4	7	1	IPI00003865.1		0	0	1.86133e-06	3.12088	0	3	1480.75	-0.421409	36.9496	1
	High	FEELNADLFR	2	8	1	IPI00003865.1		0	0	5.17301e-09	3.02368	0	2	1253.61	-2.43823	37.4949	0
	High	SINPDEAVAYGAAVQAAILSGDK	1	5	1	IPI00003865.1		0	0	3.85401e-16	3.11348	0	3	2260.14	-1.70895	42.5922	0
	Low	MVQEAEK	1	14	3	IPI00003865.1;IPI00304925.5;IPI00911039.1		0.5492			0.867455	0	2	834.395	-9.65065	16.412	0
IPI00304925.5	Heat shock 70 kDa protein 1A/1B	264.987	63.34	10	6	46	142	641	70.009	5.65576
	A2	Sequence	# PSMs	# Proteins	# Protein Groups	Protein Group Accessions	Modifications	ΔCn	q-Value	PEP	XCorr	Probability	Charge	MH+ [Da]	ΔM [ppm]	RT [min]	# Missed Cleavages
	High	FELSGIPPAPr	11	10	2	IPI00304925.5;IPI00911039.1	R11(Methyl)	0	0	3.76493e-05	2.6063	0	2	1197.66	-0.352567	34.832	0
	Low	FELSGIPPAPr	6	10	2	IPI00304925.5;IPI00911039.1	R11(Dimethyl)	0.5399			1.21328	0	2	1211.68	-0.167631	34.4168	0
	Low	rNSTIPTK	1	12	2	IPI00304925.5;IPI00911039.1	R1(Methyl)	0	0.225387	1	1.4944	0	2	930.536	-0.405984	21.2194	1
	Low	dNNLLGR	1	14	2	IPI00304925.5;IPI00911039.1	N-Term(Gln->pyro-Glu)	0	0.199798	1	0.561742	0	2	784.394	-1.56811	26.4318	0
	Low	lSKEEIER	1	12	2	IPI00304925.5;IPI00911039.1	N-Term(Gln->pyro-Glu)	0.3029			1.22321	0	2	986.515	-0.232148	26.9692	1
	Low	fGDPVVQSDMK	1	5	2	IPI00304925.5;IPI00911039.1	N-Term(Gln->pyro-Glu)	0			0.467074	0	2	1205.54	-10.5852	24.075	0
	High	SINPDEAVAYGAAVQAAILmGDK	2	12	2	IPI00304925.5;IPI00911039.1	M20(Oxidation)	0	0	3.85401e-16	3.36783	0	3	2320.15	-1.15072	42.1863	0
	High	KFGDPVVQSDmK	2	5	2	IPI00304925.5;IPI00911039.1	M11(Oxidation)	0	0	2.31497e-09	2.91063	0	2	1366.66	-2.80144	26.4485	1
	High	FGDPVVQSDmK	2	5	2	IPI00304925.5;IPI00911039.1	M10(Oxidation)	0	0	0.00017072	2.29695	0	2	1238.57	-0.627795	26.6502	0
	High	NALESYAFNmK	2	12	2	IPI00304925.5;IPI00911039.1	M10(Oxidation)	0	0	1.10377e-07	3.13916	0	2	1303.6	0.0277551	31.9932	0
	High	AFYPEEISSmVLTK	5	8	1	IPI00304925.5	M10(Oxidation)	0	0	1.06137e-12	2.81621	0	2	1630.8	-1.02585	36.42	0
	High	mVQEAEK	5	14	3	IPI00003865.1;IPI00304925.5;IPI00911039.1	M1(Oxidation)	0	0.000397	0.00398001	1.24418	0	2	850.398	-0.0444072	16.3719	0
	High	mVQEAEKYK	1	14	3	IPI00003865.1;IPI00304925.5;IPI00911039.1	M1(Oxidation)	0	0.000208	0.00017072	1.52979	0	2	1141.56	0.31855	21.3315	1
	High	ARFEELcSDLFR	3	10	2	IPI00304925.5;IPI00911039.1	C7(Carbamidomethyl)	0	0	3.85401e-16	3.80331	0	2	1542.74	-0.0980692	37.2649	1
	High	ELEQVcNPIISGLYQGAGGPGPGGFGAQGPK	2	7	2	IPI00304925.5;IPI00911039.1	C6(Carbamidomethyl)	0	0	3.85401e-16	5.19846	0	3	3055.49	-1.93679	38.967	0
	High	FEELcSDLFR	2	10	2	IPI00304925.5;IPI00911039.1	C5(Carbamidomethyl)	0	0	5.96785e-11	2.60507	0	2	1315.6	-1.09278	37.2899	0
	High	AAAIGIDLGTTYScVGVFQHGK	1	9	2	IPI00304925.5;IPI00911039.1	C14(Carbamidomethyl)	0	0	3.85401e-16	3.27521	0	3	2265.13	-1.39692	37.2216	0
	Low	DISQNK	2	13	2	IPI00304925.5;IPI00911039.1		0	0.129203	1	0.853057	0	2	704.357	-0.380542	15.9638	0
	Low	ISEADKKK	1	8	2	IPI00304925.5;IPI00911039.1		0.0536			0.527504	0	2	918.526	0.0424529	16.225	2
	Low	ISEADKK	1	8	2	IPI00304925.5;IPI00911039.1		0	0.052946	0.485614	1.07592	0	2	790.431	0.125661	16.4338	1
	High	KDISQNKR	1	13	2	IPI00304925.5;IPI00911039.1		0	0.006885	0.0828856	1.88443	0	2	988.552	-1.55158	16.5112	2
	High	DISQNKR	2	13	2	IPI00304925.5;IPI00911039.1		0	0.005347	0.0617769	1.84248	0	2	860.459	0.202756	16.9246	1
	High	AEDEVQR	1	12	2	IPI00304925.5;IPI00911039.1		0	0.000397	0.00436074	1.29679	0	2	846.395	-0.482412	18.5904	0
	High	NSTIPTK	4	12	2	IPI00304925.5;IPI00911039.1		0	0.002007	0.020118	2.21735	0	2	760.419	-1.20638	20.2315	0
	Low	RNSTIPTK	2	12	2	IPI00304925.5;IPI00911039.1		0	0.119739	1	2.08637	0	2	916.521	-0.584699	20.5652	1
	High	YKAEDEVQR	5	12	2	IPI00304925.5;IPI00911039.1		0	0	0.00017072	2.80571	0	2	1137.55	-0.327998	22.0679	1
	High	YKAEDEVQRER	1	8	2	IPI00304925.5;IPI00911039.1		0	0.005213	0.0600765	1.11445	0	3	1422.7	1.15653	22.5492	2
	High	SAVEDEGLKGK	1	8	2	IPI00304925.5;IPI00911039.1		0	0	0.00017072	2.21795	0	2	1132.59	0.546808	22.6214	1
	High	ITITNDKGR	3	22	3	IPI00003865.1;IPI00304925.5;IPI00911039.1		0	0.000208	0.00017072	2.4185	0	2	1017.57	-0.607789	23.1232	1
	High	VQVSYKGETK	4	3	1	IPI00304925.5		0	0.000208	0.00017072	2.18164	0	2	1138.61	0.085948	23.2019	1
	High	ITITNDK	1	22	3	IPI00003865.1;IPI00304925.5;IPI00911039.1		0	0.002927	0.0301578	2.03616	0	2	804.446	-0.122792	23.1952	0
	Medium	VQVSYK	1	5	1	IPI00304925.5		0	0.044311	0.436118	1.74472	0	2	723.403	-0.801213	23.3512	0
	High	LSKEEIER	2	12	2	IPI00304925.5;IPI00911039.1		0	0.000587	0.00566233	1.94872	0	2	1003.54	-0.774299	23.3538	1
	High	SAVEDEGLK	3	8	2	IPI00304925.5;IPI00911039.1		0	0	0.00017072	2.17407	0	2	947.468	-0.392978	23.9005	0
	High	STLEPVEK	4	10	2	IPI00304925.5;IPI00911039.1		0	0.000208	0.00029758	1.76606	0	2	902.483	-0.364241	24.1644	0
	High	VEIIANDQGNR	4	33	4	IPI00304925.5;IPI00911039.1;IPI00003362.3;IPI00003865.1		0	0	1.95281e-12	2.95992	0	2	1228.63	-0.00158179	25.8498	0
	Medium	DNNLLGR	3	14	2	IPI00304925.5;IPI00911039.1		0	0.0125	0.103749	1.4837	0	2	801.421	-0.0100043	26.0989	0
	Low	GGSGSGPTIEEVD	2	8	2	IPI00304925.5;IPI00911039.1		0	0.107739	1	1.95547	0	2	1204.53	-1.20514	26.9065	0
	High	ATAGDTHLGGEDFDNR	4	16	2	IPI00304925.5;IPI00911039.1		0	0	3.85401e-16	3.40611	0	2	1675.73	0.0054838	27.1419	0
	High	NQVALNPQNTVFDAKR	2	5	2	IPI00304925.5;IPI00911039.1		0	0	3.85401e-16	4.2632	0	3	1814.95	0.229076	31.3531	1
	High	TTPSYVAFTDTER	3	29	3	IPI00003865.1;IPI00304925.5;IPI00911039.1		0	0	1.52711e-15	3.33393	0	2	1487.7	-0.22583	31.9865	0
	High	NQVALNPQNTVFDAK	4	5	2	IPI00304925.5;IPI00911039.1		0	0	1.32666e-14	3.24539	0	2	1658.85	-0.48633	32.4213	0
	High	AQIHDLVLVGGSTR	5	7	2	IPI00304925.5;IPI00911039.1		0	0	1.62504e-06	3.27381	0	3	1465.81	-0.16132	32.484	0
	High	LVNHFVEEFKR	6	8	2	IPI00304925.5;IPI00911039.1		0	0	6.06055e-11	3.41395	0	3	1417.76	-0.272519	32.9614	1
	High	LVNHFVEEFK	3	8	2	IPI00304925.5;IPI00911039.1		0	0	1.00505e-08	3.78135	0	2	1261.66	-0.162539	34.1486	0
	High	LDKAQIHDLVLVGGSTR	3	7	2	IPI00304925.5;IPI00911039.1		0	0	3.85401e-16	3.20359	0	3	1822.02	-1.40073	33.9218	1
	High	HWPFQVINDGDKPK	2	5	1	IPI00304925.5		0	0	0.00017072	2.18029	0	3	1680.84	-4.43185	35.2544	0
	High	NALESYAFNMK	1	12	2	IPI00304925.5;IPI00911039.1		0	0	5.08455e-11	2.67864	0	2	1287.6	-0.602948	35.1986	0
	High	LLQDFFNGR	2	7	1	IPI00304925.5		0	0	2.0356e-05	2.094	0	2	1109.57	-0.0840255	36.8529	0
	High	DAGVIAGLNVLR	4	10	2	IPI00304925.5;IPI00911039.1		0	0	2.26323e-07	2.53705	0	2	1197.7	0.546892	36.9808	0
	High	IINEPTAAAIAYGLDR	4	9	2	IPI00304925.5;IPI00911039.1		0	0	3.85401e-16	3.85572	0	3	1687.9	-1.25313	37.3205	0
	High	AFYPEEISSMVLTK	1	8	1	IPI00304925.5		0	0	4.41731e-16	2.50542	0	2	1614.81	-1.53919	39.9448	0
	High	EIAEAYLGYPVTNAVITVPAYFNDSQR	1	4	1	IPI00304925.5		0	0	1.7713e-10	2.425	0	3	3001.49	-0.177834	42.0638	0
	Low	MVQEAEK	1	14	3	IPI00003865.1;IPI00304925.5;IPI00911039.1		0.5492			0.867455	0	2	834.395	-9.65065	16.412	0
IPI00911039.1	cDNA FLJ54408, highly similar to Heat shock 70 kDa protein 1	243.665	60.07	4	2	43	131	586	63.8849	5.5542
	A2	Sequence	# PSMs	# Proteins	# Protein Groups	Protein Group Accessions	Modifications	ΔCn	q-Value	PEP	XCorr	Probability	Charge	MH+ [Da]	ΔM [ppm]	RT [min]	# Missed Cleavages
	High	FELSGIPPAPr	11	10	2	IPI00304925.5;IPI00911039.1	R11(Methyl)	0	0	3.76493e-05	2.6063	0	2	1197.66	-0.352567	34.832	0
	Low	FELSGIPPAPr	6	10	2	IPI00304925.5;IPI00911039.1	R11(Dimethyl)	0.5399			1.21328	0	2	1211.68	-0.167631	34.4168	0
	Low	rNSTIPTK	1	12	2	IPI00304925.5;IPI00911039.1	R1(Methyl)	0	0.225387	1	1.4944	0	2	930.536	-0.405984	21.2194	1
	Low	dNNLLGR	1	14	2	IPI00304925.5;IPI00911039.1	N-Term(Gln->pyro-Glu)	0	0.199798	1	0.561742	0	2	784.394	-1.56811	26.4318	0
	Low	lSKEEIER	1	12	2	IPI00304925.5;IPI00911039.1	N-Term(Gln->pyro-Glu)	0.3029			1.22321	0	2	986.515	-0.232148	26.9692	1
	Low	fGDPVVQSDMK	1	5	2	IPI00304925.5;IPI00911039.1	N-Term(Gln->pyro-Glu)	0			0.467074	0	2	1205.54	-10.5852	24.075	0
	High	SINPDEAVAYGAAVQAAILmGDK	2	12	2	IPI00304925.5;IPI00911039.1	M20(Oxidation)	0	0	3.85401e-16	3.36783	0	3	2320.15	-1.15072	42.1863	0
	High	KFGDPVVQSDmK	2	5	2	IPI00304925.5;IPI00911039.1	M11(Oxidation)	0	0	2.31497e-09	2.91063	0	2	1366.66	-2.80144	26.4485	1
	High	FGDPVVQSDmK	2	5	2	IPI00304925.5;IPI00911039.1	M10(Oxidation)	0	0	0.00017072	2.29695	0	2	1238.57	-0.627795	26.6502	0
	High	NALESYAFNmK	2	12	2	IPI00304925.5;IPI00911039.1	M10(Oxidation)	0	0	1.10377e-07	3.13916	0	2	1303.6	0.0277551	31.9932	0
	High	mVQEAEK	5	14	3	IPI00003865.1;IPI00304925.5;IPI00911039.1	M1(Oxidation)	0	0.000397	0.00398001	1.24418	0	2	850.398	-0.0444072	16.3719	0
	High	mVQEAEKYK	1	14	3	IPI00003865.1;IPI00304925.5;IPI00911039.1	M1(Oxidation)	0	0.000208	0.00017072	1.52979	0	2	1141.56	0.31855	21.3315	1
	High	ARFEELcSDLFR	3	10	2	IPI00304925.5;IPI00911039.1	C7(Carbamidomethyl)	0	0	3.85401e-16	3.80331	0	2	1542.74	-0.0980692	37.2649	1
	High	ELEQVcNPIISGLYQGAGGPGPGGFGAQGPK	2	7	2	IPI00304925.5;IPI00911039.1	C6(Carbamidomethyl)	0	0	3.85401e-16	5.19846	0	3	3055.49	-1.93679	38.967	0
	High	FEELcSDLFR	2	10	2	IPI00304925.5;IPI00911039.1	C5(Carbamidomethyl)	0	0	5.96785e-11	2.60507	0	2	1315.6	-1.09278	37.2899	0
	High	AAAIGIDLGTTYScVGVFQHGK	1	9	2	IPI00304925.5;IPI00911039.1	C14(Carbamidomethyl)	0	0	3.85401e-16	3.27521	0	3	2265.13	-1.39692	37.2216	0
	Low	STGNANKITITNDK	1	1	1	IPI00911039.1		0.7679			0.649996	0	2	1476.74	-14.3106	41.6458	1
	Low	DISQNK	2	13	2	IPI00304925.5;IPI00911039.1		0	0.129203	1	0.853057	0	2	704.357	-0.380542	15.9638	0
	Low	ISEADKKK	1	8	2	IPI00304925.5;IPI00911039.1		0.0536			0.527504	0	2	918.526	0.0424529	16.225	2
	Low	ISEADKK	1	8	2	IPI00304925.5;IPI00911039.1		0	0.052946	0.485614	1.07592	0	2	790.431	0.125661	16.4338	1
	High	KDISQNKR	1	13	2	IPI00304925.5;IPI00911039.1		0	0.006885	0.0828856	1.88443	0	2	988.552	-1.55158	16.5112	2
	High	DISQNKR	2	13	2	IPI00304925.5;IPI00911039.1		0	0.005347	0.0617769	1.84248	0	2	860.459	0.202756	16.9246	1
	High	AEDEVQR	1	12	2	IPI00304925.5;IPI00911039.1		0	0.000397	0.00436074	1.29679	0	2	846.395	-0.482412	18.5904	0
	High	NSTIPTK	4	12	2	IPI00304925.5;IPI00911039.1		0	0.002007	0.020118	2.21735	0	2	760.419	-1.20638	20.2315	0
	Low	RNSTIPTK	2	12	2	IPI00304925.5;IPI00911039.1		0	0.119739	1	2.08637	0	2	916.521	-0.584699	20.5652	1
	High	YKAEDEVQR	5	12	2	IPI00304925.5;IPI00911039.1		0	0	0.00017072	2.80571	0	2	1137.55	-0.327998	22.0679	1
	High	YKAEDEVQRER	1	8	2	IPI00304925.5;IPI00911039.1		0	0.005213	0.0600765	1.11445	0	3	1422.7	1.15653	22.5492	2
	High	SAVEDEGLKGK	1	8	2	IPI00304925.5;IPI00911039.1		0	0	0.00017072	2.21795	0	2	1132.59	0.546808	22.6214	1
	High	ITITNDKGR	3	22	3	IPI00003865.1;IPI00304925.5;IPI00911039.1		0	0.000208	0.00017072	2.4185	0	2	1017.57	-0.607789	23.1232	1
	High	ITITNDK	1	22	3	IPI00003865.1;IPI00304925.5;IPI00911039.1		0	0.002927	0.0301578	2.03616	0	2	804.446	-0.122792	23.1952	0
	High	LSKEEIER	2	12	2	IPI00304925.5;IPI00911039.1		0	0.000587	0.00566233	1.94872	0	2	1003.54	-0.774299	23.3538	1
	High	SAVEDEGLK	3	8	2	IPI00304925.5;IPI00911039.1		0	0	0.00017072	2.17407	0	2	947.468	-0.392978	23.9005	0
	High	STLEPVEK	4	10	2	IPI00304925.5;IPI00911039.1		0	0.000208	0.00029758	1.76606	0	2	902.483	-0.364241	24.1644	0
	High	VEIIANDQGNR	4	33	4	IPI00304925.5;IPI00911039.1;IPI00003362.3;IPI00003865.1		0	0	1.95281e-12	2.95992	0	2	1228.63	-0.00158179	25.8498	0
	Medium	DNNLLGR	3	14	2	IPI00304925.5;IPI00911039.1		0	0.0125	0.103749	1.4837	0	2	801.421	-0.0100043	26.0989	0
	Low	GGSGSGPTIEEVD	2	8	2	IPI00304925.5;IPI00911039.1		0	0.107739	1	1.95547	0	2	1204.53	-1.20514	26.9065	0
	High	ATAGDTHLGGEDFDNR	4	16	2	IPI00304925.5;IPI00911039.1		0	0	3.85401e-16	3.40611	0	2	1675.73	0.0054838	27.1419	0
	High	NQVALNPQNTVFDAKR	2	5	2	IPI00304925.5;IPI00911039.1		0	0	3.85401e-16	4.2632	0	3	1814.95	0.229076	31.3531	1
	High	TTPSYVAFTDTER	3	29	3	IPI00003865.1;IPI00304925.5;IPI00911039.1		0	0	1.52711e-15	3.33393	0	2	1487.7	-0.22583	31.9865	0
	High	NQVALNPQNTVFDAK	4	5	2	IPI00304925.5;IPI00911039.1		0	0	1.32666e-14	3.24539	0	2	1658.85	-0.48633	32.4213	0
	High	AQIHDLVLVGGSTR	5	7	2	IPI00304925.5;IPI00911039.1		0	0	1.62504e-06	3.27381	0	3	1465.81	-0.16132	32.484	0
	High	LVNHFVEEFKR	6	8	2	IPI00304925.5;IPI00911039.1		0	0	6.06055e-11	3.41395	0	3	1417.76	-0.272519	32.9614	1
	High	LVNHFVEEFK	3	8	2	IPI00304925.5;IPI00911039.1		0	0	1.00505e-08	3.78135	0	2	1261.66	-0.162539	34.1486	0
	High	LDKAQIHDLVLVGGSTR	3	7	2	IPI00304925.5;IPI00911039.1		0	0	3.85401e-16	3.20359	0	3	1822.02	-1.40073	33.9218	1
	High	NALESYAFNMK	1	12	2	IPI00304925.5;IPI00911039.1		0	0	5.08455e-11	2.67864	0	2	1287.6	-0.602948	35.1986	0
	High	LLQDFFDGRDLNK	1	1	1	IPI00911039.1		0	0	0.00017072	1.79491	0	3	1580.8	-1.39911	36.6792	1
	High	DAGVIAGLNVLR	4	10	2	IPI00304925.5;IPI00911039.1		0	0	2.26323e-07	2.53705	0	2	1197.7	0.546892	36.9808	0
	High	IINEPTAAAIAYGLDR	4	9	2	IPI00304925.5;IPI00911039.1		0	0	3.85401e-16	3.85572	0	3	1687.9	-1.25313	37.3205	0
	High	LLQDFFDGR	3	1	1	IPI00911039.1		0	0	0.00017072	2.69056	0	2	1110.56	-1.74282	37.6156	0
	Low	MVQEAEK	1	14	3	IPI00003865.1;IPI00304925.5;IPI00911039.1		0.5492			0.867455	0	2	834.395	-9.65065	16.412	0
IPI00220327.4	Keratin, type II cytoskeletal 1	188.481	38.82	2	22	32	126	644	65.999	8.11865
	A2	Sequence	# PSMs	# Proteins	# Protein Groups	Protein Group Accessions	Modifications	ΔCn	q-Value	PEP	XCorr	Probability	Charge	MH+ [Da]	ΔM [ppm]	RT [min]	# Missed Cleavages
	Low	YEELQITAGr	1	2	2	IPI00220327.4;IPI00293665.9	R10(Methyl)	0.2684			1.39201	0	2	1193.62	-0.907719	30.3845	0
	Low	rVDQLK	1	1	1	IPI00220327.4	R1(Methyl)	0.0385			0.745327	0	2	772.455	-15.9135	24.423	1
	Low	mSrQFSSR	1	1	1	IPI00220327.4	N-Term(Gln->pyro-Glu); R3(Trimethyl)	0.0492			0.584252	0	2	1023.49	-11.2077	16.2746	1
	High	DVDGAYmTK	1	1	1	IPI00220327.4	M7(Oxidation)	0	0.000746	0.00640298	1.12464	0	2	1015.44	0.335801	21.5778	0
	High	GSGGGSSGGSIGGR	8	1	1	IPI00220327.4		0	0	1.61992e-10	2.30945	0	2	1092.5	-1.61562	18.4049	0
	Low	NKYEDEINK	3	13	3	IPI00293665.9;IPI00021304.1;IPI00220327.4		0			0.658677	0	2	1152.54	-9.13733	26.7903	1
	Low	RVDQLK	7	1	1	IPI00220327.4		0.0189	0.460374	1	1.55887	0	2	758.451	-1.12584	21.4674	1
	High	NKYEDEINKR	8	11	2	IPI00293665.9;IPI00220327.4		0	0	2.15508e-05	2.61261	0	2	1308.65	0.219549	23.9966	2
	High	AQYEDIAQK	9	1	1	IPI00220327.4		0	0	0.00017072	1.79449	0	2	1065.52	-0.10099	24.1911	0
	High	SLVNLGGSK	5	1	1	IPI00220327.4		0	0.000208	0.000172844	2.16747	0	2	874.499	-0.333104	29.0242	0
	High	IEISELNR	10	2	2	IPI00021304.1;IPI00220327.4		0	0.000208	0.0015153	1.96136	0	2	973.532	0.655023	29.9173	0
	High	SLDLDSIIAEVK	6	1	1	IPI00220327.4		0	0	2.09905e-11	2.40959	0	2	1302.71	-0.605069	41.1324	0
	Low	EREQIK	4	1	1	IPI00220327.4		0	0.164822	1	1.9374	0	2	802.442	0.124364	18.831	1
	High	FLEQQNQVLQTK	6	3	2	IPI00021304.1;IPI00220327.4		0	0	3.43176e-12	3.09349	0	2	1475.78	-1.2376	29.0819	0
	High	YEELQITAGR	6	2	2	IPI00220327.4;IPI00293665.9		0	0	3.65911e-07	2.57132	0	2	1179.6	0.0340505	30.1761	0
	High	LRSEIDNVKK	9	1	1	IPI00220327.4		0	0.000208	0.000565556	2.7152	0	3	1201.69	-0.631345	23.8462	2
	High	SKAEAESLYQSK	4	1	1	IPI00220327.4		0	0	3.85401e-16	3.50958	0	2	1340.67	0.331202	24.7674	1
	Medium	SEIDNVKK	2	1	1	IPI00220327.4		0	0.02251	0.197726	1.06264	0	2	932.503	-1.86914	21.0699	1
	High	YEDEINKR	3	18	3	IPI00021304.1;IPI00293665.9;IPI00220327.4		0	0.000208	0.000635427	1.55762	0	2	1066.52	1.26251	22.3711	1
	Medium	LDSELK	1	3	1	IPI00220327.4		0	0.025745	0.277894	1.09202	0	2	704.381	-2.39268	23.5184	0
	High	AEAESLYQSK	2	1	1	IPI00220327.4		0	0	6.05875e-05	2.10414	0	2	1125.54	-0.106121	24.7919	0
	High	TLLEGEESR	2	1	1	IPI00220327.4		0	0	0.00017072	2.40331	0	2	1033.52	-0.867895	26.7146	0
	High	TNAENEFVTIKK	6	1	1	IPI00220327.4		0	0	5.44917e-13	3.57339	0	2	1393.73	-1.84357	28.8677	1
	Low	SISISVAR	2	1	1	IPI00220327.4		0	0.063566	0.683242	1.05146	0	2	832.49	2.08264	29.5816	0
	High	TNAENEFVTIK	2	1	1	IPI00220327.4		0	0	2.84804e-09	2.8128	0	2	1265.64	0.766327	31.051	0
	High	WELLQQVDTSTR	2	1	1	IPI00220327.4		0	0	4.23759e-16	3.2476	0	2	1475.75	-0.904699	36.1766	0
	High	SLNNQFASFIDK	3	1	1	IPI00220327.4		0	0	9.14088e-16	2.97998	0	2	1383.69	-0.35728	36.8454	0
	High	SLNNQFASFIDKVR	2	1	1	IPI00220327.4		0	0	6.92339e-15	2.75588	0	2	1638.86	0.750694	39.3249	1
	High	NKLNDLEDALQQAKEDLAR	1	1	1	IPI00220327.4		0	0	1.88364e-05	2.10993	0	3	2184.13	1.07711	40.5665	2
	High	THNLEPYFESFINNLRR	2	1	1	IPI00220327.4		0	0.000397	0.00335429	2.04807	0	3	2150.08	1.28798	42.8259	1
	High	THNLEPYFESFINNLR	3	1	1	IPI00220327.4		0	0	1.51388e-08	2.01555	0	3	1993.98	-0.149326	43.6038	0
	High	GENALKDAK	1	1	1	IPI00220327.4		0	0.000208	0.00239716	1.05681	0	2	945.502	1.62049	20.9119	1
	High	DVDGAYMTK	1	1	1	IPI00220327.4		0	0.00107	0.0117189	1.44865	0	2	999.443	-2.4871	25.0498	0
	High	DYQELMNTK	1	1	1	IPI00220327.4		0	0.000208	0.000600335	1.40125	0	2	1141.52	-1.59049	29.031	0
	High	LNDLEDALQQAKEDLAR	1	1	1	IPI00220327.4		0	0	3.85401e-16	4.77562	0	3	1941.98	-2.48613	40.4723	1
IPI00645452.1	Tubulin, beta	171.985	60.56	9	0	25	74	426	47.736	4.80518
	A2	Sequence	# PSMs	# Proteins	# Protein Groups	Protein Group Accessions	Modifications	ΔCn	q-Value	PEP	XCorr	Probability	Charge	MH+ [Da]	ΔM [ppm]	RT [min]	# Missed Cleavages
	Low	YLTVAAVFr	1	13	4	IPI00007752.1;IPI00023598.2;IPI00645452.1;IPI00909140.9	R9(Methyl)	0.1171			1.95656	0	2	1053.61	-0.466134	40.786	0
	High	ISEQFTAmFR	3	21	5	IPI00007752.1;IPI00013475.1;IPI00023598.2;IPI00645452.1;IPI00909140.9	M8(Oxidation)	0	0	2.3385e-06	2.55998	0	2	1245.59	1.08847	32.7703	0
	High	EVDEQmLNVQNK	1	15	4	IPI00007752.1;IPI00013475.1;IPI00645452.1;IPI00909140.9	M6(Oxidation)	0	0	1.20165e-12	2.5626	0	2	1462.68	0.0461279	24.4095	0
	High	KLAVNmVPFPR	1	33	5	IPI00007752.1;IPI00013475.1;IPI00645452.1;IPI00909140.9;IPI00023598.2	M6(Oxidation)	0	0	2.24429e-09	2.65482	0	2	1287.72	-0.45498	32.6099	1
	High	LAVNmVPFPR	5	33	5	IPI00007752.1;IPI00013475.1;IPI00645452.1;IPI00909140.9;IPI00023598.2	M5(Oxidation)	0	0	5.94779e-08	3.02814	0	2	1159.63	-0.716378	33.6728	0
	High	LHFFmPGFAPLTSR	4	26	5	IPI00007752.1;IPI00013475.1;IPI00023598.2;IPI00645452.1;IPI00909140.9	M5(Oxidation)	0	0	2.66555e-12	3.10045	0	2	1636.83	1.47055	39.321	0
	High	NmmAAcDPR	2	30	5	IPI00007752.1;IPI00013475.1;IPI00023598.2;IPI00645452.1;IPI00909140.9	M2(Oxidation); M3(Oxidation); C6(Carbamidomethyl)	0	0.001402	0.0132209	1.92581	0	2	1097.42	-0.269281	17.7162	0
	High	ImNTFSVVPSPK	2	13	4	IPI00007752.1;IPI00023598.2;IPI00645452.1;IPI00909140.9	M2(Oxidation)	0	0	7.21676e-11	2.54829	0	2	1335.7	1.12304	31.5105	0
	High	LTTPTYGDLNHLVSATmSGVTTcLR	2	16	5	IPI00007752.1;IPI00013475.1;IPI00023598.2;IPI00645452.1;IPI00909140.9	M17(Oxidation); C23(Carbamidomethyl)	0	0	3.85401e-16	4.81143	0	3	2724.33	-2.15268	38.0147	0
	High	AILVDLEPGTmDSVR	2	9	3	IPI00013475.1;IPI00645452.1;IPI00909140.9	M11(Oxidation)	0	0	2.39108e-09	2.38348	0	2	1631.83	-0.0846622	34.9211	0
	High	IREEYPDRImNTFSVVPSPK	1	7	3	IPI00007752.1;IPI00645452.1;IPI00909140.9	M10(Oxidation)	0	0	8.22702e-11	2.32566	0	3	2394.21	-1.12247	33.5028	2
	High	mSmKEVDEQmLNVQNK	2	15	4	IPI00007752.1;IPI00013475.1;IPI00645452.1;IPI00909140.9	M1(Oxidation); M3(Oxidation); M10(Oxidation)	0	0	2.58167e-14	3.45223	0	3	1971.88	0.112619	24.1892	1
	High	mAVTFIGNSTAIQELFKR	1	7	2	IPI00645452.1;IPI00909140.9	M1(Oxidation)	0	0	3.85401e-16	3.9376	0	3	2042.07	-1.80192	40.9703	1
	High	mAVTFIGNSTAIQELFK	1	7	2	IPI00645452.1;IPI00909140.9	M1(Oxidation)	0	0	3.85401e-16	3.2245	0	2	1885.97	0.281006	42.3391	0
	High	TAVcDIPPR	16	22	5	IPI00007752.1;IPI00013475.1;IPI00023598.2;IPI00645452.1;IPI00909140.9	C4(Carbamidomethyl)	0	0.000208	0.00153002	2.30123	0	2	1028.52	-0.0589118	26.002	0
	Low	GSQQYR	1	32	5	IPI00007752.1;IPI00013475.1;IPI00023598.2;IPI00645452.1;IPI00909140.9		0	0.096073	1	1.64627	0	2	738.353	0.263665	17.7094	0
	High	IREEYPDR	4	23	4	IPI00007752.1;IPI00013475.1;IPI00645452.1;IPI00909140.9		0	0.000397	0.00314328	2.43634	0	2	1077.53	0.117864	23.2898	1
	High	ISVYYNEATGGK	2	4	2	IPI00645452.1;IPI00909140.9		0	0	2.91327e-13	3.11388	0	2	1301.64	-1.30271	28.2835	0
	High	FPGQLNADLRK	8	34	5	IPI00007752.1;IPI00013475.1;IPI00645452.1;IPI00909140.9;IPI00023598.2		0	0	2.71514e-12	2.40802	0	3	1258.69	-0.581931	30.222	1
	High	FPGQLNADLR	3	34	5	IPI00007752.1;IPI00013475.1;IPI00645452.1;IPI00909140.9;IPI00023598.2		0	0	8.77509e-10	3.04897	0	2	1130.6	1.00995	32.138	0
	High	YLTVAAVFR	1	13	4	IPI00007752.1;IPI00023598.2;IPI00645452.1;IPI00909140.9		0	0	0.00017072	2.49912	0	2	1039.59	-0.800635	38.4395	0
	High	NSSYFVEWIPNNVK	1	23	5	IPI00007752.1;IPI00013475.1;IPI00023598.2;IPI00645452.1;IPI00909140.9		0	0.000208	0.00017072	1.96253	0	2	1696.83	-2.84572	39.0092	0
	High	ALTVPELTQQVFDAK	4	7	2	IPI00645452.1;IPI00909140.9		0	0	1.79246e-11	3.1306	0	3	1659.89	-0.952103	39.5689	0
	High	SGPFGQIFRPDNFVFGQSGAGNNWAK	1	10	5	IPI00007752.1;IPI00013475.1;IPI00023598.2;IPI00645452.1;IPI00909140.9		0	0	4.15255e-16	2.92205	0	3	2798.34	-1.36385	41.3216	0
	High	GHYTEGAELVDSVLDVVRK	1	14	3	IPI00007752.1;IPI00013475.1;IPI00645452.1		0	0	5.21618e-08	2.47615	0	3	2087.07	-0.923307	42.0265	1
	High	GHYTEGAELVDSVLDVVR	4	14	3	IPI00007752.1;IPI00013475.1;IPI00645452.1		0	0	3.85401e-16	3.58563	0	3	1958.98	-0.579004	43.1232	0
IPI00009865.4	Keratin, type I cytoskeletal 10	171.734	42.12	34	24	26	94	584	58.7917	5.21143
	A2	Sequence	# PSMs	# Proteins	# Protein Groups	Protein Group Accessions	Modifications	ΔCn	q-Value	PEP	XCorr	Probability	Charge	MH+ [Da]	ΔM [ppm]	RT [min]	# Missed Cleavages
	Low	vTmQNLNDR	2	8	1	IPI00009865.4	N-Term(Gln->pyro-Glu); M3(Oxidation)	0.5438			1.25166	0	2	1089.5	-2.4191	25.6568	0
	High	qSVEADINGLRR	3	5	1	IPI00009865.4	N-Term(Gln->pyro-Glu)	0	0	6.45602e-09	2.25044	0	2	1340.69	1.21927	32.4005	1
	Medium	NHEEEmKDLR	2	1	1	IPI00009865.4	M6(Oxidation)	0	0.034048	0.413552	1.41537	0	3	1316.59	-1.60418	20.4823	1
	Low	ADLEmQIESLTEELAYLK	1	1	1	IPI00009865.4	M5(Oxidation)	0			0.435954	0	2	2112.03	-5.53941	47.4903	0
	High	ADLEmQIESLTEELAYLKK	1	1	1	IPI00009865.4	M5(Oxidation)	0	0	4.2195e-16	3.48289	0	3	2240.13	-2.06123	45.4907	1
	High	LKYENEVALR	8	1	1	IPI00009865.4		0	0	2.82528e-07	2.5378	0	2	1234.68	-0.245217	29.2947	1
	High	HGNSHQGEPR	7	1	1	IPI00009865.4		0	0	4.20161e-16	3.6796	0	2	1118.51	-1.67172	16.5892	0
	High	SQYEQLAEQNRK	9	1	1	IPI00009865.4		0	0	1.6146e-10	3.70758	0	2	1493.73	-0.76279	24.7152	1
	High	SLLEGEGSSGGGGR	4	1	1	IPI00009865.4		0	0	6.48168e-07	2.36446	0	2	1262.59	-2.12363	26.2183	0
	High	SEITELRR	6	1	1	IPI00009865.4		0	0.001552	0.0158656	2.26876	0	2	1003.55	-0.469728	26.4609	1
	High	YENEVALR	3	1	1	IPI00009865.4		0	0	4.86091e-05	2.03533	0	2	993.5	0.272209	26.896	0
	High	LENEIQTYR	3	1	1	IPI00009865.4		0	0	6.99318e-05	2.44085	0	2	1165.58	-0.982801	27.3924	0
	High	LAADDFR	6	26	1	IPI00009865.4		0	0.000397	0.0051362	1.64301	0	2	807.4	0.21741	27.9687	0
	High	ALEESNYELEGK	6	1	1	IPI00009865.4		0	0	1.92107e-14	2.47619	0	2	1381.65	-0.339177	27.9689	0
	High	LASYLDKVR	5	14	1	IPI00009865.4		0	0.000208	0.00017072	2.35762	0	2	1064.61	1.26089	29.8321	1
	High	VLDELTLTK	6	1	1	IPI00009865.4		0	0	3.65103e-05	2.32955	0	2	1031.6	0.0823679	32.561	0
	High	TIDDLKNQILNLTTDNANILLQIDNAR	1	1	1	IPI00009865.4		0	0	3.85401e-16	3.13123	0	3	3052.62	-2.05147	44.4811	1
	High	SSSSGSVGESSSK	1	1	1	IPI00009865.4		0	0	1.69366e-11	2.72543	0	2	1185.52	1.12042	15.8421	0
	High	SQYEQLAEQNR	2	1	1	IPI00009865.4		0	0	7.12616e-09	3.07857	0	2	1365.64	-1.54995	25.434	0
	High	VTMQNLNDR	2	8	1	IPI00009865.4		0	0	0.00017072	2.6395	0	2	1090.53	1.14885	25.7151	0
	High	LASYLDK	2	15	2	IPI00009865.4;IPI00019359.4		0	0.000397	0.0051092	2.09765	0	2	809.439	-1.60336	27.3822	0
	Medium	SEITELR	3	1	1	IPI00009865.4		0	0.022983	0.20784	1.6415	0	2	847.451	-1.51054	27.5589	0
	High	IKEWYEK	2	1	1	IPI00009865.4		0	0.000746	0.00766024	1.43364	0	2	995.518	-1.27785	28.7473	1
	High	IRLENEIQTYR	3	1	1	IPI00009865.4		0	0	3.85401e-16	3.50732	0	2	1434.77	0.641442	31.3379	1
	High	DAEAWFNEK	1	4	1	IPI00009865.4		0	0.000208	0.00017072	2.35243	0	2	1109.49	0.920265	32.746	0
	High	GSLGGGFSSGGFSGGSFSR	2	1	1	IPI00009865.4		0	0	3.85401e-16	2.90943	0	2	1707.77	-0.695414	33.599	0
	High	SKELTTEIDNNIEQISSYK	2	1	1	IPI00009865.4		0	0	8.80763e-09	1.96608	0	2	2212.1	-1.02644	36.3389	1
	High	NHEEEMKDLR	1	1	1	IPI00009865.4		0	0.000208	0.000495439	2.63494	0	2	1300.59	-0.900843	24.8785	1
IPI00007752.1	Tubulin beta-2C chain	164.216	62.25	15	1	26	73	445	49.799	4.89404
	A2	Sequence	# PSMs	# Proteins	# Protein Groups	Protein Group Accessions	Modifications	ΔCn	q-Value	PEP	XCorr	Probability	Charge	MH+ [Da]	ΔM [ppm]	RT [min]	# Missed Cleavages
	Low	YLTVAAVFr	1	13	4	IPI00007752.1;IPI00023598.2;IPI00645452.1;IPI00909140.9	R9(Methyl)	0.1171			1.95656	0	2	1053.61	-0.466134	40.786	0
	High	ISEQFTAmFR	3	21	5	IPI00007752.1;IPI00013475.1;IPI00023598.2;IPI00645452.1;IPI00909140.9	M8(Oxidation)	0	0	2.3385e-06	2.55998	0	2	1245.59	1.08847	32.7703	0
	High	EVDEQmLNVQNK	1	15	4	IPI00007752.1;IPI00013475.1;IPI00645452.1;IPI00909140.9	M6(Oxidation)	0	0	1.20165e-12	2.5626	0	2	1462.68	0.0461279	24.4095	0
	High	KLAVNmVPFPR	1	33	5	IPI00007752.1;IPI00013475.1;IPI00645452.1;IPI00909140.9;IPI00023598.2	M6(Oxidation)	0	0	2.24429e-09	2.65482	0	2	1287.72	-0.45498	32.6099	1
	High	LAVNmVPFPR	5	33	5	IPI00007752.1;IPI00013475.1;IPI00645452.1;IPI00909140.9;IPI00023598.2	M5(Oxidation)	0	0	5.94779e-08	3.02814	0	2	1159.63	-0.716378	33.6728	0
	High	LHFFmPGFAPLTSR	4	26	5	IPI00007752.1;IPI00013475.1;IPI00023598.2;IPI00645452.1;IPI00909140.9	M5(Oxidation)	0	0	2.66555e-12	3.10045	0	2	1636.83	1.47055	39.321	0
	High	NmmAAcDPR	2	30	5	IPI00007752.1;IPI00013475.1;IPI00023598.2;IPI00645452.1;IPI00909140.9	M2(Oxidation); M3(Oxidation); C6(Carbamidomethyl)	0	0.001402	0.0132209	1.92581	0	2	1097.42	-0.269281	17.7162	0
	High	ImNTFSVVPSPK	2	13	4	IPI00007752.1;IPI00023598.2;IPI00645452.1;IPI00909140.9	M2(Oxidation)	0	0	7.21676e-11	2.54829	0	2	1335.7	1.12304	31.5105	0
	High	LTTPTYGDLNHLVSATmSGVTTcLR	2	16	5	IPI00007752.1;IPI00013475.1;IPI00023598.2;IPI00645452.1;IPI00909140.9	M17(Oxidation); C23(Carbamidomethyl)	0	0	3.85401e-16	4.81143	0	3	2724.33	-2.15268	38.0147	0
	High	AVLVDLEPGTmDSVR	1	10	2	IPI00007752.1;IPI00023598.2	M11(Oxidation)	0	0	9.25791e-14	2.70881	0	2	1617.81	-1.20175	33.5326	0
	High	ALTVPELTQQmFDAK	1	11	2	IPI00007752.1;IPI00023598.2	M11(Oxidation)	0	0	1.73948e-09	2.11339	0	2	1707.86	1.46814	34.7757	0
	High	IREEYPDRImNTFSVVPSPK	1	7	3	IPI00007752.1;IPI00645452.1;IPI00909140.9	M10(Oxidation)	0	0	8.22702e-11	2.32566	0	3	2394.21	-1.12247	33.5028	2
	High	mSmKEVDEQmLNVQNK	2	15	4	IPI00007752.1;IPI00013475.1;IPI00645452.1;IPI00909140.9	M1(Oxidation); M3(Oxidation); M10(Oxidation)	0	0	2.58167e-14	3.45223	0	3	1971.88	0.112619	24.1892	1
	High	mREIVHLQAGQcGNQIGAK	3	17	3	IPI00013475.1;IPI00007752.1;IPI00023598.2	M1(Oxidation); C12(Carbamidomethyl)	0	0	3.85401e-16	4.22712	0	3	2126.06	-1.33889	27.8497	1
	High	mSATFIGNSTAIQELFKR	1	7	2	IPI00007752.1;IPI00013475.1	M1(Oxidation)	0	0	4.45857e-15	3.08201	0	3	2030.04	0.148118	39.9452	1
	High	TAVcDIPPR	16	22	5	IPI00007752.1;IPI00013475.1;IPI00023598.2;IPI00645452.1;IPI00909140.9	C4(Carbamidomethyl)	0	0.000208	0.00153002	2.30123	0	2	1028.52	-0.0589118	26.002	0
	High	EIVHLQAGQcGNQIGAK	2	17	3	IPI00007752.1;IPI00023598.2;IPI00013475.1	C10(Carbamidomethyl)	0	0	0.00017072	1.89526	0	3	1822.92	0.513997	27.867	0
	Low	GSQQYR	1	32	5	IPI00007752.1;IPI00013475.1;IPI00023598.2;IPI00645452.1;IPI00909140.9		0	0.096073	1	1.64627	0	2	738.353	0.263665	17.7094	0
	High	IREEYPDR	4	23	4	IPI00007752.1;IPI00013475.1;IPI00645452.1;IPI00909140.9		0	0.000397	0.00314328	2.43634	0	2	1077.53	0.117864	23.2898	1
	High	INVYYNEATGGK	1	3	1	IPI00007752.1		0	0	6.44306e-09	2.56848	0	2	1328.65	-1.395	28.3171	0
	High	FPGQLNADLRK	8	34	5	IPI00007752.1;IPI00013475.1;IPI00645452.1;IPI00909140.9;IPI00023598.2		0	0	2.71514e-12	2.40802	0	3	1258.69	-0.581931	30.222	1
	High	FPGQLNADLR	3	34	5	IPI00007752.1;IPI00013475.1;IPI00645452.1;IPI00909140.9;IPI00023598.2		0	0	8.77509e-10	3.04897	0	2	1130.6	1.00995	32.138	0
	High	YLTVAAVFR	1	13	4	IPI00007752.1;IPI00023598.2;IPI00645452.1;IPI00909140.9		0	0	0.00017072	2.49912	0	2	1039.59	-0.800635	38.4395	0
	High	NSSYFVEWIPNNVK	1	23	5	IPI00007752.1;IPI00013475.1;IPI00023598.2;IPI00645452.1;IPI00909140.9		0	0.000208	0.00017072	1.96253	0	2	1696.83	-2.84572	39.0092	0
	High	SGPFGQIFRPDNFVFGQSGAGNNWAK	1	10	5	IPI00007752.1;IPI00013475.1;IPI00023598.2;IPI00645452.1;IPI00909140.9		0	0	4.15255e-16	2.92205	0	3	2798.34	-1.36385	41.3216	0
	High	GHYTEGAELVDSVLDVVRK	1	14	3	IPI00007752.1;IPI00013475.1;IPI00645452.1		0	0	5.21618e-08	2.47615	0	3	2087.07	-0.923307	42.0265	1
	High	GHYTEGAELVDSVLDVVR	4	14	3	IPI00007752.1;IPI00013475.1;IPI00645452.1		0	0	3.85401e-16	3.58563	0	3	1958.98	-0.579004	43.1232	0
IPI00909140.9	cDNA FLJ56903, highly similar to Tubulin beta-7 chain	163.442	58.84	8	1	25	73	464	52.0151	4.91943
	A2	Sequence	# PSMs	# Proteins	# Protein Groups	Protein Group Accessions	Modifications	ΔCn	q-Value	PEP	XCorr	Probability	Charge	MH+ [Da]	ΔM [ppm]	RT [min]	# Missed Cleavages
	Low	YLTVAAVFr	1	13	4	IPI00007752.1;IPI00023598.2;IPI00645452.1;IPI00909140.9	R9(Methyl)	0.1171			1.95656	0	2	1053.61	-0.466134	40.786	0
	High	ISEQFTAmFR	3	21	5	IPI00007752.1;IPI00013475.1;IPI00023598.2;IPI00645452.1;IPI00909140.9	M8(Oxidation)	0	0	2.3385e-06	2.55998	0	2	1245.59	1.08847	32.7703	0
	High	EVDEQmLNVQNK	1	15	4	IPI00007752.1;IPI00013475.1;IPI00645452.1;IPI00909140.9	M6(Oxidation)	0	0	1.20165e-12	2.5626	0	2	1462.68	0.0461279	24.4095	0
	High	KLAVNmVPFPR	1	33	5	IPI00007752.1;IPI00013475.1;IPI00645452.1;IPI00909140.9;IPI00023598.2	M6(Oxidation)	0	0	2.24429e-09	2.65482	0	2	1287.72	-0.45498	32.6099	1
	High	LAVNmVPFPR	5	33	5	IPI00007752.1;IPI00013475.1;IPI00645452.1;IPI00909140.9;IPI00023598.2	M5(Oxidation)	0	0	5.94779e-08	3.02814	0	2	1159.63	-0.716378	33.6728	0
	High	LHFFmPGFAPLTSR	4	26	5	IPI00007752.1;IPI00013475.1;IPI00023598.2;IPI00645452.1;IPI00909140.9	M5(Oxidation)	0	0	2.66555e-12	3.10045	0	2	1636.83	1.47055	39.321	0
	High	NmmAAcDPR	2	30	5	IPI00007752.1;IPI00013475.1;IPI00023598.2;IPI00645452.1;IPI00909140.9	M2(Oxidation); M3(Oxidation); C6(Carbamidomethyl)	0	0.001402	0.0132209	1.92581	0	2	1097.42	-0.269281	17.7162	0
	High	ImNTFSVVPSPK	2	13	4	IPI00007752.1;IPI00023598.2;IPI00645452.1;IPI00909140.9	M2(Oxidation)	0	0	7.21676e-11	2.54829	0	2	1335.7	1.12304	31.5105	0
	High	LTTPTYGDLNHLVSATmSGVTTcLR	2	16	5	IPI00007752.1;IPI00013475.1;IPI00023598.2;IPI00645452.1;IPI00909140.9	M17(Oxidation); C23(Carbamidomethyl)	0	0	3.85401e-16	4.81143	0	3	2724.33	-2.15268	38.0147	0
	High	AILVDLEPGTmDSVR	2	9	3	IPI00013475.1;IPI00645452.1;IPI00909140.9	M11(Oxidation)	0	0	2.39108e-09	2.38348	0	2	1631.83	-0.0846622	34.9211	0
	High	IREEYPDRImNTFSVVPSPK	1	7	3	IPI00007752.1;IPI00645452.1;IPI00909140.9	M10(Oxidation)	0	0	8.22702e-11	2.32566	0	3	2394.21	-1.12247	33.5028	2
	Low	mGDVGPr	2	1	1	IPI00909140.9	M1(Oxidation); R7(Trimethyl)	0.586			0.647111	0	2	789.392	-0.649865	22.0704	0
	Low	mGDVGPr	1	1	1	IPI00909140.9	M1(Oxidation); R7(Methyl)	0.4745			0.71803	0	2	761.359	-2.13127	21.1139	0
	High	mSmKEVDEQmLNVQNK	2	15	4	IPI00007752.1;IPI00013475.1;IPI00645452.1;IPI00909140.9	M1(Oxidation); M3(Oxidation); M10(Oxidation)	0	0	2.58167e-14	3.45223	0	3	1971.88	0.112619	24.1892	1
	High	mAVTFIGNSTAIQELFKR	1	7	2	IPI00645452.1;IPI00909140.9	M1(Oxidation)	0	0	3.85401e-16	3.9376	0	3	2042.07	-1.80192	40.9703	1
	High	mAVTFIGNSTAIQELFK	1	7	2	IPI00645452.1;IPI00909140.9	M1(Oxidation)	0	0	3.85401e-16	3.2245	0	2	1885.97	0.281006	42.3391	0
	High	TAVcDIPPR	16	22	5	IPI00007752.1;IPI00013475.1;IPI00023598.2;IPI00645452.1;IPI00909140.9	C4(Carbamidomethyl)	0	0.000208	0.00153002	2.30123	0	2	1028.52	-0.0589118	26.002	0
	Low	GSQQYR	1	32	5	IPI00007752.1;IPI00013475.1;IPI00023598.2;IPI00645452.1;IPI00909140.9		0	0.096073	1	1.64627	0	2	738.353	0.263665	17.7094	0
	High	IREEYPDR	4	23	4	IPI00007752.1;IPI00013475.1;IPI00645452.1;IPI00909140.9		0	0.000397	0.00314328	2.43634	0	2	1077.53	0.117864	23.2898	1
	High	ISVYYNEATGGK	2	4	2	IPI00645452.1;IPI00909140.9		0	0	2.91327e-13	3.11388	0	2	1301.64	-1.30271	28.2835	0
	High	FPGQLNADLRK	8	34	5	IPI00007752.1;IPI00013475.1;IPI00645452.1;IPI00909140.9;IPI00023598.2		0	0	2.71514e-12	2.40802	0	3	1258.69	-0.581931	30.222	1
	High	FPGQLNADLR	3	34	5	IPI00007752.1;IPI00013475.1;IPI00645452.1;IPI00909140.9;IPI00023598.2		0	0	8.77509e-10	3.04897	0	2	1130.6	1.00995	32.138	0
	High	FWEVISDEHGIDPTGTYHGDSDLQLDR	1	3	1	IPI00909140.9		0	0	1.86795e-14	3.09226	0	3	3102.41	0.0840642	37.173	0
	High	YLTVAAVFR	1	13	4	IPI00007752.1;IPI00023598.2;IPI00645452.1;IPI00909140.9		0	0	0.00017072	2.49912	0	2	1039.59	-0.800635	38.4395	0
	High	NSSYFVEWIPNNVK	1	23	5	IPI00007752.1;IPI00013475.1;IPI00023598.2;IPI00645452.1;IPI00909140.9		0	0.000208	0.00017072	1.96253	0	2	1696.83	-2.84572	39.0092	0
	High	ALTVPELTQQVFDAK	4	7	2	IPI00645452.1;IPI00909140.9		0	0	1.79246e-11	3.1306	0	3	1659.89	-0.952103	39.5689	0
	High	SGPFGQIFRPDNFVFGQSGAGNNWAK	1	10	5	IPI00007752.1;IPI00013475.1;IPI00023598.2;IPI00645452.1;IPI00909140.9		0	0	4.15255e-16	2.92205	0	3	2798.34	-1.36385	41.3216	0
IPI00003918.6	60S ribosomal protein L4	160.159	66.28	4	34	47	91	427	47.6674	11.063
	A2	Sequence	# PSMs	# Proteins	# Protein Groups	Protein Group Accessions	Modifications	ΔCn	q-Value	PEP	XCorr	Probability	Charge	MH+ [Da]	ΔM [ppm]	RT [min]	# Missed Cleavages
	Low	QArNHK	1	2	1	IPI00003918.6	R3(Trimethyl)	0.5474			0.426727	0	2	795.448	-13.4119	15.6459	1
	Low	nPLKNLrIMLK	1	2	1	IPI00003918.6	N-Term(Gln->pyro-Glu); R7(Dimethyl)	0	0.682314	1	0.919604	0	3	1350.81	-12.8005	31.5743	2
	High	qKKPLVGK	2	2	1	IPI00003918.6	N-Term(Gln->pyro-Glu)	0	0.000208	0.00102239	2.07313	0	2	880.561	-0.34918	21.6613	1
	Low	lNPYAKTMR	1	2	1	IPI00003918.6	N-Term(Gln->pyro-Glu)	0.3704			0.847534	0	2	1076.55	-6.40619	22.4453	1
	High	SGQGAFGNmcR	2	3	1	IPI00003918.6	M9(Oxidation); C10(Carbamidomethyl)	0	0	6.85245e-07	2.67471	0	2	1200.49	-1.07463	22.8748	0
	High	SNYNLPmHK	3	3	1	IPI00003918.6	M7(Oxidation)	0	0.000208	0.00017072	2.06645	0	2	1119.52	-0.865349	23.8886	0
	High	mINTDLSR	3	3	1	IPI00003918.6	M1(Oxidation)	0	0.000208	0.00017072	1.98676	0	2	965.471	-1.02475	25.1753	0
	Medium	mFAPTK	2	4	1	IPI00003918.6	M1(Oxidation)	0	0.03798	0.436118	1.6416	0	2	710.355	0.884997	22.4356	0
	High	YAIcSALAASALPALVmSK	2	3	1	IPI00003918.6	C4(Carbamidomethyl); M17(Oxidation)	0	0	4.65719e-16	3.08021	0	2	1953.01	-2.18767	40.0078	0
	High	RGPcIIYNEDNGIIK	2	3	1	IPI00003918.6	C4(Carbamidomethyl)	0	0	5.14644e-13	2.81798	0	3	1761.9	0.0303987	32.568	1
	High	GPcIIYNEDNGIIK	1	3	1	IPI00003918.6	C3(Carbamidomethyl)	0	0	5.81041e-09	2.85836	0	2	1605.79	-0.879996	33.1383	0
	High	FcIWTESAFR	1	3	1	IPI00003918.6	C2(Carbamidomethyl)	0	0	8.46187e-08	2.80941	0	2	1316.61	-1.74244	39.369	0
	Medium	VYASQR	3	3	1	IPI00003918.6		0	0.012183	0.0950927	1.52219	0	2	723.378	-0.796381	18.4965	0
	High	LAPGGHVGR	4	3	1	IPI00003918.6		0	0.000208	0.00017072	1.69532	0	2	863.485	0.218353	21.6094	0
	High	AAAAAAALQAK	5	2	1	IPI00003918.6		0	0	0.00017072	1.91996	0	2	956.552	0.0580187	24.9467	0
	High	NIPGITLLNVSK	3	3	1	IPI00003918.6		0	0	4.66142e-16	3.49461	0	2	1268.76	0.713304	37.8538	0
	High	KPTTEEK	2	3	1	IPI00003918.6		0	0.000917	0.00811171	1.98672	0	2	832.441	0.338178	15.2619	0
	Low	VRGGGTHR	1	3	1	IPI00003918.6		0			0.749162	0	2	839.46	1.04049	15.4314	1
	High	VNTTQKR	1	3	1	IPI00003918.6		0	0.003338	0.0403737	1.74648	0	2	846.48	1.31361	15.4974	1
	Low	RVNTTQK	1	4	1	IPI00003918.6		0	0.585258	1	1.41212	0	2	846.48	1.02519	15.9373	1
	Low	RVNTTQKR	1	3	1	IPI00003918.6		0	0.166265	1	1.80185	0	2	1002.58	-2.04137	16.5551	2
	Medium	KPVVGKK	3	2	1	IPI00003918.6		0	0.012071	0.093851	2.32725	0	2	755.514	-0.309586	17.4294	1
	High	KAAVGVKK	1	2	1	IPI00003918.6		0	0.002324	0.0225824	2.13599	0	2	800.534	-1.18914	18.2893	2
	High	KPTTEEKKPAA	2	3	1	IPI00003918.6		0	0	0.00017072	2.01651	0	2	1199.66	-1.99987	18.3346	1
	Low	KVYASQR	1	3	1	IPI00003918.6		0	0.107558	1	1.62194	0	2	851.474	0.757888	18.9709	1
	Low	KQKKPLVGK	1	2	1	IPI00003918.6		0	0.368246	1	0.869084	0	2	1025.68	0.951813	19.6369	2
	Low	QKKPLVGKK	1	2	1	IPI00003918.6		0.069			0.805261	0	2	1025.68	0.951813	19.6369	2
	High	KPLVGKK	2	3	1	IPI00003918.6		0	0.00479	0.0560485	1.77009	0	2	769.529	-0.57438	19.9185	1
	Medium	SPEIQR	3	3	1	IPI00003918.6		0	0.01628	0.169812	1.58904	0	2	729.389	-0.232737	20.4909	0
	Medium	QKKPLVGK	1	2	1	IPI00003918.6		0	0.029239	0.345078	0.997074	0	2	897.588	-0.341116	20.6798	1
	Medium	LNPYAK	1	2	1	IPI00003918.6		0	0.023193	0.214219	1.47889	0	2	705.392	-1.07995	22.8198	0
	High	AWNDIKK	1	3	1	IPI00003918.6		0	0.001402	0.0121268	1.32623	0	2	874.478	-0.0403925	25.7075	1
	High	VDKAAAAAAALQAK	2	2	1	IPI00003918.6		0	0	3.85401e-16	3.6495	0	2	1298.74	-1.53306	27.4084	1
	Low	AWNDIK	1	3	1	IPI00003918.6		0			0.735749	0	2	746.383	-0.538914	27.916	0
	Medium	LKAWNDIKK	1	3	1	IPI00003918.6		0	0.012303	0.0979613	1.39484	0	2	1115.66	-0.490734	28.3028	2
	Low	KLKAWNDIK	1	3	1	IPI00003918.6		0.3597			0.889617	0	2	1115.66	-0.490734	28.3028	2
	High	TKEAVLLLKK	2	2	1	IPI00003918.6		0	0	0.00017072	2.27968	0	2	1142.75	1.38756	29.6619	2
	Low	KTKEAVLLLK	1	2	1	IPI00003918.6		0.7149			0.647363	0	2	1142.75	1.38756	29.6619	2
	High	EAVLLLKK	2	2	1	IPI00003918.6		0	0.001552	0.0159547	1.60649	0	2	913.607	-0.72441	30.4584	1
	High	TKEAVLLLK	2	2	1	IPI00003918.6		0	0	0.00017072	2.48734	0	2	1014.66	0.599581	32.1245	1
	High	EAVLLLK	2	2	1	IPI00003918.6		0	0.002007	0.0221403	1.78204	0	2	785.513	-0.765735	33.7491	0
	High	KLDELYGTWR	1	3	1	IPI00003918.6		0	0	1.41736e-10	3.20005	0	2	1280.66	-0.0262545	34.128	1
	High	APIRPDIVNFVHTNLRK	3	3	1	IPI00003918.6		0	0	3.85401e-16	3.24063	0	4	1990.13	-0.694367	35.5283	1
	High	NVTLPAVFK	3	3	1	IPI00003918.6		0	0.000208	0.000170824	1.913	0	2	988.581	-1.43331	36.2503	0
	High	APIRPDIVNFVHTNLR	4	3	1	IPI00003918.6		0	0	3.85401e-16	3.30909	0	2	1862.04	-2.23589	36.8319	0
	High	IEEVPELPLVVEDKVEGYKK	4	2	1	IPI00003918.6		0	0	3.85401e-16	5.46837	0	4	2313.26	-0.945302	38.0879	2
	High	IEEVPELPLVVEDKVEGYK	1	2	1	IPI00003918.6		0	0	3.85401e-16	3.65484	0	3	2185.16	-2.25181	39.2749	1
	Low	RNTILR	2	2	1	IPI00003918.6		0.172			1.53606	0	2	772.48	0.996171	22.3642	1
IPI00021304.1	Keratin, type II cytoskeletal 2 epidermal	156.726	34.57	20	18	26	83	645	65.8254	8.00146
	A2	Sequence	# PSMs	# Proteins	# Protein Groups	Protein Group Accessions	Modifications	ΔCn	q-Value	PEP	XCorr	Probability	Charge	MH+ [Da]	ΔM [ppm]	RT [min]	# Missed Cleavages
	High	GrGGGGGGFR	1	1	1	IPI00021304.1	R2(Dimethyl)	0	0.004648	0.0540214	1.17637	0	2	905.471	1.40234	22.0809	1
	Low	KLLEGEEcR	1	14	2	IPI00021304.1;IPI00293665.9	C8(Carbamidomethyl)	0.2475			0.762161	0	3	1133.57	5.40203	16.1147	1
	High	IEISELNR	10	2	2	IPI00021304.1;IPI00220327.4		0	0.000208	0.0015153	1.96136	0	2	973.532	0.655023	29.9173	0
	High	LQGEIAHVK	4	1	1	IPI00021304.1		0	0	9.86039e-05	2.02801	0	2	994.567	-0.685649	24.9602	0
	High	AQYEEIAQR	4	12	2	IPI00021304.1;IPI00293665.9		0	0.000208	0.000173497	2.30476	0	2	1107.54	-2.0354	25.0563	0
	High	GFSSGSAVVSGGSR	4	1	1	IPI00021304.1		0	0	2.6984e-15	3.30594	0	2	1254.61	-1.28392	25.5087	0
	High	HGGGGGGFGGGGFGSR	8	1	1	IPI00021304.1		0	0	3.85401e-16	3.00482	0	2	1320.58	0.0166903	27.4793	0
	High	FLEQQNQVLQTK	6	3	2	IPI00021304.1;IPI00220327.4		0	0	3.43176e-12	3.09349	0	2	1475.78	-1.2376	29.0819	0
	High	FASFIDK	5	33	2	IPI00021304.1;IPI00293665.9		0	0.000208	0.000814338	1.66943	0	2	827.43	0.338409	31.9387	0
	High	AQEREQIK	2	11	1	IPI00021304.1		0	0.000208	0.000492133	2.18113	0	2	1001.54	0.346528	19.4095	1
	Medium	VELQSK	2	1	1	IPI00021304.1		0	0.02656	0.287352	1.43571	0	2	703.398	-0.99174	20.4124	0
	High	GGSISGGGYGSGGGK	1	1	1	IPI00021304.1		0	0	5.73176e-14	2.8685	0	2	1197.55	1.49959	21.3432	0
	High	YEDEINKR	3	18	3	IPI00021304.1;IPI00293665.9;IPI00220327.4		0	0.000208	0.000635427	1.55762	0	2	1066.52	1.26251	22.3711	1
	High	KYEDEINKR	5	4	1	IPI00021304.1		0	0	5.08836e-07	3.2185	0	3	1194.61	1.60184	22.4632	2
	High	LQGEIAHVKK	3	1	1	IPI00021304.1		0	0	0.00017072	2.1661	0	2	1122.66	-0.552424	23.7751	1
	Medium	HGDSLKEIK	1	1	1	IPI00021304.1		0	0.025644	0.274416	1.98267	0	2	1026.56	2.64297	24.1313	1
	High	SKEEAEALYHSK	5	1	1	IPI00021304.1		0	0	4.07538e-16	3.04872	0	2	1391.68	1.52138	24.9279	1
	High	NVQDAIADAEQR	1	1	1	IPI00021304.1		0	0	1.7613e-11	2.92697	0	2	1329.64	-2.07352	29.2026	0
	High	TAAENDFVTLKK	2	1	1	IPI00021304.1		0	0	6.19958e-11	2.81933	0	2	1336.71	-0.661949	29.2119	1
	High	YEELQVTVGR	1	1	1	IPI00021304.1		0	0	0.00017072	1.89908	0	2	1193.62	-0.907719	30.3845	0
	High	TAAENDFVTLK	2	1	1	IPI00021304.1		0	0	2.42862e-05	1.99946	0	2	1208.62	1.38831	31.5384	0
	High	FASFIDKVR	3	29	2	IPI00021304.1;IPI00293665.9		0	0	0.00017072	1.76631	0	3	1082.6	0.570775	33.3206	1
	High	NVQDAIADAEQRGEHALK	1	1	1	IPI00021304.1		0	0	4.41428e-16	3.4673	0	3	1964.98	-0.275239	34.2539	1
	High	NVQDAIADAEQRGEHALKDAR	1	1	1	IPI00021304.1		0	0	4.91765e-16	3.57646	0	3	2307.14	-1.6755	36.0019	2
	High	VDLLNQEIEFLK	3	1	1	IPI00021304.1		0	0	5.83478e-08	2.48878	0	2	1460.8	-2.2447	41.155	0
	High	NLDLDSIIAEVK	4	13	2	IPI00021304.1;IPI00293665.9		0	0	1.39787e-13	3.4049	0	2	1329.73	-0.619658	40.9837	0
IPI00013475.1	Tubulin beta-2A chain	154.226	59.55	12	2	24	70	445	49.875	4.89404
	A2	Sequence	# PSMs	# Proteins	# Protein Groups	Protein Group Accessions	Modifications	ΔCn	q-Value	PEP	XCorr	Probability	Charge	MH+ [Da]	ΔM [ppm]	RT [min]	# Missed Cleavages
	High	ISEQFTAmFR	3	21	5	IPI00007752.1;IPI00013475.1;IPI00023598.2;IPI00645452.1;IPI00909140.9	M8(Oxidation)	0	0	2.3385e-06	2.55998	0	2	1245.59	1.08847	32.7703	0
	High	EVDEQmLNVQNK	1	15	4	IPI00007752.1;IPI00013475.1;IPI00645452.1;IPI00909140.9	M6(Oxidation)	0	0	1.20165e-12	2.5626	0	2	1462.68	0.0461279	24.4095	0
	High	KLAVNmVPFPR	1	33	5	IPI00007752.1;IPI00013475.1;IPI00645452.1;IPI00909140.9;IPI00023598.2	M6(Oxidation)	0	0	2.24429e-09	2.65482	0	2	1287.72	-0.45498	32.6099	1
	High	LAVNmVPFPR	5	33	5	IPI00007752.1;IPI00013475.1;IPI00645452.1;IPI00909140.9;IPI00023598.2	M5(Oxidation)	0	0	5.94779e-08	3.02814	0	2	1159.63	-0.716378	33.6728	0
	High	LHFFmPGFAPLTSR	4	26	5	IPI00007752.1;IPI00013475.1;IPI00023598.2;IPI00645452.1;IPI00909140.9	M5(Oxidation)	0	0	2.66555e-12	3.10045	0	2	1636.83	1.47055	39.321	0
	High	ImNTFSVmPSPK	1	10	1	IPI00013475.1	M2(Oxidation); M8(Oxidation)	0	0	3.39092e-08	1.87283	0	2	1383.66	-1.70575	28.3095	0
	High	NmmAAcDPR	2	30	5	IPI00007752.1;IPI00013475.1;IPI00023598.2;IPI00645452.1;IPI00909140.9	M2(Oxidation); M3(Oxidation); C6(Carbamidomethyl)	0	0.001402	0.0132209	1.92581	0	2	1097.42	-0.269281	17.7162	0
	High	LTTPTYGDLNHLVSATmSGVTTcLR	2	16	5	IPI00007752.1;IPI00013475.1;IPI00023598.2;IPI00645452.1;IPI00909140.9	M17(Oxidation); C23(Carbamidomethyl)	0	0	3.85401e-16	4.81143	0	3	2724.33	-2.15268	38.0147	0
	High	AILVDLEPGTmDSVR	2	9	3	IPI00013475.1;IPI00645452.1;IPI00909140.9	M11(Oxidation)	0	0	2.39108e-09	2.38348	0	2	1631.83	-0.0846622	34.9211	0
	High	mSmKEVDEQmLNVQNK	2	15	4	IPI00007752.1;IPI00013475.1;IPI00645452.1;IPI00909140.9	M1(Oxidation); M3(Oxidation); M10(Oxidation)	0	0	2.58167e-14	3.45223	0	3	1971.88	0.112619	24.1892	1
	High	mREIVHIQAGQcGNQIGAK	3	17	3	IPI00013475.1;IPI00007752.1;IPI00023598.2	M1(Oxidation); C12(Carbamidomethyl)	0	0	3.85401e-16	4.22712	0	3	2126.06	-1.33889	27.8497	1
	High	mSATFIGNSTAIQELFKR	1	7	2	IPI00007752.1;IPI00013475.1	M1(Oxidation)	0	0	4.45857e-15	3.08201	0	3	2030.04	0.148118	39.9452	1
	High	TAVcDIPPR	16	22	5	IPI00007752.1;IPI00013475.1;IPI00023598.2;IPI00645452.1;IPI00909140.9	C4(Carbamidomethyl)	0	0.000208	0.00153002	2.30123	0	2	1028.52	-0.0589118	26.002	0
	High	EIVHIQAGQcGNQIGAK	2	17	3	IPI00007752.1;IPI00023598.2;IPI00013475.1	C10(Carbamidomethyl)	0	0	0.00017072	1.89526	0	3	1822.92	0.513997	27.867	0
	Low	GSQQYR	1	32	5	IPI00007752.1;IPI00013475.1;IPI00023598.2;IPI00645452.1;IPI00909140.9		0	0.096073	1	1.64627	0	2	738.353	0.263665	17.7094	0
	High	IREEYPDR	4	23	4	IPI00007752.1;IPI00013475.1;IPI00645452.1;IPI00909140.9		0	0.000397	0.00314328	2.43634	0	2	1077.53	0.117864	23.2898	1
	High	FPGQLNADLRK	8	34	5	IPI00007752.1;IPI00013475.1;IPI00645452.1;IPI00909140.9;IPI00023598.2		0	0	2.71514e-12	2.40802	0	3	1258.69	-0.581931	30.222	1
	High	FPGQLNADLR	3	34	5	IPI00007752.1;IPI00013475.1;IPI00645452.1;IPI00909140.9;IPI00023598.2		0	0	8.77509e-10	3.04897	0	2	1130.6	1.00995	32.138	0
	Low	ALTVPELTQQMFDSK	1	5	1	IPI00013475.1		0.1991			1.68896	0	2	1707.86	1.47107	34.7757	0
	High	NSSYFVEWIPNNVK	1	23	5	IPI00007752.1;IPI00013475.1;IPI00023598.2;IPI00645452.1;IPI00909140.9		0	0.000208	0.00017072	1.96253	0	2	1696.83	-2.84572	39.0092	0
	High	YLTVAAIFR	1	5	1	IPI00013475.1		0	0	1.3299e-05	2.22475	0	2	1053.61	-0.466134	40.786	0
	High	SGPFGQIFRPDNFVFGQSGAGNNWAK	1	10	5	IPI00007752.1;IPI00013475.1;IPI00023598.2;IPI00645452.1;IPI00909140.9		0	0	4.15255e-16	2.92205	0	3	2798.34	-1.36385	41.3216	0
	High	GHYTEGAELVDSVLDVVRK	1	14	3	IPI00007752.1;IPI00013475.1;IPI00645452.1		0	0	5.21618e-08	2.47615	0	3	2087.07	-0.923307	42.0265	1
	High	GHYTEGAELVDSVLDVVR	4	14	3	IPI00007752.1;IPI00013475.1;IPI00645452.1		0	0	3.85401e-16	3.58563	0	3	1958.98	-0.579004	43.1232	0
IPI00414676.6	Heat shock protein HSP 90-beta	142.885	47.93	14	18	45	93	724	83.2121	5.03369
	A2	Sequence	# PSMs	# Proteins	# Protein Groups	Protein Group Accessions	Modifications	ΔCn	q-Value	PEP	XCorr	Probability	Charge	MH+ [Da]	ΔM [ppm]	RT [min]	# Missed Cleavages
	Low	cLELFSELAEDKENYKK	1	4	1	IPI00414676.6	N-Term(Gln->pyro-Glu); C1(Carbamidomethyl)	0	0.057499	0.60398	0.992131	0	3	2099	-1.49206	43.4479	2
	High	qKAEADKNDK	3	4	2	IPI00784295.2;IPI00414676.6	N-Term(Gln->pyro-Glu)	0	0	7.84788e-10	3.47542	0	2	1129.55	1.23942	15.7621	2
	Medium	EmLQQSK	2	9	2	IPI00784295.2;IPI00414676.6	M2(Oxidation)	0	0.020244	0.171739	1.3201	0	2	879.425	1.00982	17.5026	0
	High	TLTLVDTGIGmTK	4	6	2	IPI00784295.2;IPI00414676.6	M11(Oxidation)	0	0	4.49046e-15	2.95956	0	2	1365.73	0.947617	32.9083	0
	High	YHTSQSGDEmTSLSEYVSR	2	4	1	IPI00414676.6	M10(Oxidation)	0	0	3.85401e-16	3.66547	0	3	2192.94	-0.096572	30.0969	0
	High	AKFENLcK	2	2	1	IPI00414676.6	C7(Carbamidomethyl)	0	0.000397	0.00445447	1.83543	0	2	1009.51	-0.159485	25.7334	1
	High	FENLcK	1	7	2	IPI00784295.2;IPI00414676.6	C5(Carbamidomethyl)	0	0.008226	0.0891987	1.49525	0	2	810.381	-0.412381	25.0371	0
	Low	KMEESK	1	2	1	IPI00414676.6		0			0.46795	0	2	751.38	19.7588	21.2944	1
	High	SIYYITGESK	9	4	1	IPI00414676.6		0	0	5.75865e-06	2.47431	0	2	1160.58	0.438231	30.3058	0
	Low	KNIVKK	1	9	2	IPI00784295.2;IPI00414676.6		0	0.098882	1	1.31343	0	2	729.498	-0.439983	17.7145	2
	High	VKEVVKK	1	3	1	IPI00414676.6		0	0.006164	0.0737187	2.2169	0	2	829.551	0.262249	18.822	2
	Low	VKEVVK	1	3	1	IPI00414676.6		0	0.06875	0.799896	1.57672	0	2	701.455	-0.996046	19.8364	1
	High	ADHGEPIGR	4	2	1	IPI00414676.6		0	0.000746	0.00684485	2.45287	0	2	951.462	-1.96682	21.0693	0
	Low	EILDKK	1	3	2	IPI00414676.6;IPI00784295.2		0			1.02119	0	2	745.447	2.22527	21.9128	1
	High	LGIHEDSTNRR	2	4	1	IPI00414676.6		0	0.000917	0.00885762	1.46018	0	3	1297.66	-1.16858	23.7514	1
	High	LGIHEDSTNR	3	4	1	IPI00414676.6		0	0	1.73202e-06	2.11532	0	2	1141.56	-1.22303	23.8395	0
	High	YIDQEELNK	1	6	2	IPI00784295.2;IPI00414676.6		0	0	0.000119677	2.0906	0	2	1151.56	0.828607	25.687	0
	Medium	SLVSVTK	2	3	1	IPI00414676.6		0	0.020942	0.17361	1.4506	0	2	733.445	-0.7205	26.3093	0
	High	EDQTEYLEERR	1	6	2	IPI00784295.2;IPI00414676.6		0	0	0.000145302	2.02905	0	3	1467.67	0.730404	26.0646	1
	High	EKYIDQEELNK	1	6	2	IPI00784295.2;IPI00414676.6		0	0.000746	0.00773465	1.2623	0	2	1408.7	0.159729	26.277	1
	High	EDQTEYLEER	1	7	2	IPI00784295.2;IPI00414676.6		0	0	0.00017072	2.18358	0	2	1311.57	-0.626657	26.6526	0
	High	EQVANSAFVER	2	3	1	IPI00414676.6		0	0	6.42222e-07	2.80379	0	2	1249.62	-1.53593	27.4371	0
	High	YESLTDPSKLDSGK	2	8	2	IPI00784295.2;IPI00414676.6		0	0	2.45677e-14	3.0968	0	2	1539.75	0.0522671	27.7327	1
	High	EGLELPEDEEEKKK	1	6	2	IPI00784295.2;IPI00414676.6		0	0.000208	0.000569405	1.74595	0	3	1672.82	-4.34811	28.504	2
	High	ELISNASDALDK	1	5	2	IPI00027230.3;IPI00414676.6		0	0	3.18028e-12	3.09548	0	2	1275.64	0.284331	29.6365	0
	High	VILHLK	3	8	2	IPI00784295.2;IPI00414676.6		0	0.008869	0.091181	1.24083	0	2	722.492	-0.498749	30.1404	0
	High	LSELLR	4	12	2	IPI00414676.6;IPI00784295.2		0	0.003641	0.0430837	1.56968	0	2	730.447	2.32054	30.0227	0
	Low	RLSELLR	1	4	1	IPI00414676.6		0	0.118412	1	0.698024	0	2	886.548	1.17184	31.4323	1
	High	IDIIPNPQER	2	3	1	IPI00414676.6		0	0	0.00017072	2.96142	0	2	1194.65	0.0865922	31.9314	0
	High	VILHLKEDQTEYLEERR	2	6	2	IPI00784295.2;IPI00414676.6		0	0	3.85401e-16	2.80469	0	4	2171.15	0.477099	32.0791	2
	High	KHLEINPDHPIVETLR	2	1	1	IPI00414676.6		0	0	1.24492e-15	1.48611	0	4	1911.04	0.100092	32.4767	1
	High	VILHLKEDQTEYLEER	3	7	2	IPI00784295.2;IPI00414676.6		0	0	3.85401e-16	3.74483	0	3	2015.05	0.846348	32.657	1
	High	NPDDITQEEYGEFYK	1	1	1	IPI00414676.6		0	0	4.34525e-16	3.4291	0	2	1847.8	0.712276	32.7746	0
	High	HLEINPDHPIVETLR	2	1	1	IPI00414676.6		0	0	3.85401e-16	3.44085	0	3	1782.95	0.182896	33.6626	0
	High	ELISNASDALDKIR	2	5	2	IPI00027230.3;IPI00414676.6		0	0	2.65708e-14	2.54125	0	2	1544.83	-0.561444	33.7578	1
	High	RAPFDLFENKK	3	3	1	IPI00414676.6		0	0	0.00017072	2.91035	0	3	1364.73	-0.670797	34.3013	2
	High	GVVDSEDLPLNISR	2	9	3	IPI00784295.2;IPI00414676.6;IPI00646055.2		0	0	1.26476e-14	2.93566	0	2	1513.79	2.46732	34.4165	0
	High	SLTNDWEDHLAVK	2	4	2	IPI00784295.2;IPI00414676.6		0	0	2.70315e-15	3.11537	0	2	1527.74	-0.744837	34.2466	0
	High	HFSVEGQLEFR	2	8	2	IPI00784295.2;IPI00414676.6		0	0	4.46398e-16	3.72461	0	2	1348.66	-1.99497	34.2564	0
	High	ADLINNLGTIAK	2	7	2	IPI00784295.2;IPI00414676.6		0	0	5.78058e-09	2.99646	0	2	1242.71	1.53666	34.539	0
	High	RAPFDLFENK	2	3	1	IPI00414676.6		0	0.000208	0.000981508	2.47662	0	2	1236.64	-0.557231	35.8271	1
	High	APFDLFENK	1	3	1	IPI00414676.6		0	0	0.00017072	2.05545	0	2	1080.54	-0.369419	36.8321	0
	Medium	ALLFIPR	4	1	1	IPI00414676.6		0	0.01947	0.171734	1.42111	0	2	829.529	-0.532835	38.0535	0
	High	HSQFIGYPITLYLEK	2	3	1	IPI00414676.6		0	0	2.19514e-10	2.77535	0	2	1808.96	-1.08734	40.887	0
	Low	KKMEESK	1	2	1	IPI00414676.6		0.4825			0.73916	0	2	879.457	-4.35462	29.576	2
IPI00784295.2	Isoform 1 of Heat shock protein HSP 90-alpha	134.95	43.03	18	21	41	79	732	84.6067	5.021
	A2	Sequence	# PSMs	# Proteins	# Protein Groups	Protein Group Accessions	Modifications	ΔCn	q-Value	PEP	XCorr	Probability	Charge	MH+ [Da]	ΔM [ppm]	RT [min]	# Missed Cleavages
	Low	ALLFVPr	4	8	1	IPI00784295.2	R7(Methyl)	0.2901			1.14988	0	2	829.529	-0.679991	38.1783	0
	High	qKAEADKNDK	3	4	2	IPI00784295.2;IPI00414676.6	N-Term(Gln->pyro-Glu)	0	0	7.84788e-10	3.47542	0	2	1129.55	1.23942	15.7621	2
	Low	TDTGEPmGr	1	2	1	IPI00784295.2	M7(Oxidation); R9(Trimethyl)	0.4724			0.668243	0	2	1021.47	6.5878	24.2267	0
	High	TDTGEPmGR	3	2	1	IPI00784295.2	M7(Oxidation)	0	0.000208	0.00017072	1.9084	0	2	979.415	0.40385	17.178	0
	Medium	EmLQQSK	2	9	2	IPI00784295.2;IPI00414676.6	M2(Oxidation)	0	0.020244	0.171739	1.3201	0	2	879.425	1.00982	17.5026	0
	Medium	ImKDILEK	1	3	1	IPI00784295.2	M2(Oxidation)	0	0.022095	0.186118	1.59525	0	2	1005.56	-0.938635	26.353	1
	High	TLTIVDTGIGmTK	4	6	2	IPI00784295.2;IPI00414676.6	M11(Oxidation)	0	0	4.49046e-15	2.95956	0	2	1365.73	0.947617	32.9083	0
	High	FENLcK	1	7	2	IPI00784295.2;IPI00414676.6	C5(Carbamidomethyl)	0	0.008226	0.0891987	1.49525	0	2	810.381	-0.412381	25.0371	0
	Low	KNLVKK	1	9	2	IPI00784295.2;IPI00414676.6		0	0.098882	1	1.31343	0	2	729.498	-0.439983	17.7145	2
	High	LGIHEDSQNRK	2	3	1	IPI00784295.2		0	0.000208	0.00017072	2.05295	0	3	1296.67	0.227394	23.0685	1
	High	LGIHEDSQNR	2	3	1	IPI00784295.2		0	0.000208	0.000201186	1.97121	0	2	1168.57	-0.911964	23.7002	0
	Low	IKEIVK	1	5	1	IPI00784295.2		0.0547			1.20905	0	2	729.486	-1.02631	23.6935	1
	High	TLVSVTK	2	4	1	IPI00784295.2		0	0.006164	0.0742672	1.30356	0	2	747.461	-0.332153	25.5731	0
	High	YIDQEELNK	1	6	2	IPI00784295.2;IPI00414676.6		0	0	0.000119677	2.0906	0	2	1151.56	0.828607	25.687	0
	High	EDQTEYLEERR	1	6	2	IPI00784295.2;IPI00414676.6		0	0	0.000145302	2.02905	0	3	1467.67	0.730404	26.0646	1
	High	EKYIDQEELNK	1	6	2	IPI00784295.2;IPI00414676.6		0	0.000746	0.00773465	1.2623	0	2	1408.7	0.159729	26.277	1
	High	EDQTEYLEER	1	7	2	IPI00784295.2;IPI00414676.6		0	0	0.00017072	2.18358	0	2	1311.57	-0.626657	26.6526	0
	High	DQVANSAFVER	2	3	1	IPI00784295.2		0	0	2.84439e-05	2.2961	0	2	1235.6	-0.841562	27.1415	0
	High	YESLTDPSKLDSGK	2	8	2	IPI00784295.2;IPI00414676.6		0	0	2.45677e-14	3.0968	0	2	1539.75	0.0522671	27.7327	1
	High	ELISNSSDALDK	1	4	1	IPI00784295.2		0	0	2.28695e-09	2.7588	0	2	1291.64	0.535725	27.8418	0
	High	FYEQFSK	2	3	1	IPI00784295.2		0	0.000208	0.00116659	1.88745	0	2	948.445	-1.63807	28.4026	0
	High	EGLELPEDEEEKKK	1	6	2	IPI00784295.2;IPI00414676.6		0	0.000208	0.000569405	1.74595	0	3	1672.82	-4.34811	28.504	2
	High	HIYYITGETK	1	4	1	IPI00784295.2		0	0	4.58573e-14	3.23957	0	2	1224.63	-0.42257	29.0086	0
	High	VILHLK	3	8	2	IPI00784295.2;IPI00414676.6		0	0.008869	0.091181	1.24083	0	2	722.492	-0.498749	30.1404	0
	High	LSELLR	4	12	2	IPI00414676.6;IPI00784295.2		0	0.003641	0.0430837	1.56968	0	2	730.447	2.32054	30.0227	0
	Medium	KLSELLR	1	4	1	IPI00784295.2		0	0.010188	0.0919447	2.13636	0	2	858.541	0.766573	31.007	1
	High	ELISNSSDALDKIR	1	3	1	IPI00784295.2		0	0	1.74145e-15	3.29232	0	2	1560.83	1.7669	31.7042	1
	High	VILHLKEDQTEYLEERR	2	6	2	IPI00784295.2;IPI00414676.6		0	0	3.85401e-16	2.80469	0	4	2171.15	0.477099	32.0791	2
	High	NPDDITNEEYGEFYK	1	3	1	IPI00784295.2		0	0	4.77974e-15	3.24007	0	2	1833.78	0.0656781	32.4124	0
	High	VILHLKEDQTEYLEER	3	7	2	IPI00784295.2;IPI00414676.6		0	0	3.85401e-16	3.74483	0	3	2015.05	0.846348	32.657	1
	High	ELHINLIPNKQDR	2	3	1	IPI00784295.2		0	0	1.35297e-09	3.31412	0	3	1589.88	1.00276	32.7435	1
	High	ELHINLIPNK	2	4	1	IPI00784295.2		0	0.002324	0.0237309	2.37918	0	2	1190.69	0.431317	34.0164	0
	High	GVVDSEDLPLNISR	2	9	3	IPI00784295.2;IPI00414676.6;IPI00646055.2		0	0	1.26476e-14	2.93566	0	2	1513.79	2.46732	34.4165	0
	High	KHLEINPDHSIIETLR	1	2	1	IPI00784295.2		0	0	3.85401e-16	3.86512	0	3	1915.04	-0.00800571	34.2368	1
	High	SLTNDWEDHLAVK	2	4	2	IPI00784295.2;IPI00414676.6		0	0	2.70315e-15	3.11537	0	2	1527.74	-0.744837	34.2466	0
	High	HFSVEGQLEFR	2	8	2	IPI00784295.2;IPI00414676.6		0	0	4.46398e-16	3.72461	0	2	1348.66	-1.99497	34.2564	0
	High	RAPFDLFENRK	1	3	1	IPI00784295.2		0	0.006164	0.0771303	1.81151	0	3	1392.74	0.470647	34.4663	2
	High	ADLINNLGTIAK	2	7	2	IPI00784295.2;IPI00414676.6		0	0	5.78058e-09	2.99646	0	2	1242.71	1.53666	34.539	0
	High	HLEINPDHSIIETLR	2	2	1	IPI00784295.2		0	0	3.85401e-16	3.96367	0	2	1786.94	-1.6751	35.4556	0
	High	RAPFDLFENR	3	3	1	IPI00784295.2		0	0	3.85401e-16	3.67888	0	2	1264.64	-0.485122	36.2305	1
	High	ALLFVPR	2	8	1	IPI00784295.2		0	0.008745	0.090777	1.58801	0	2	815.513	-1.18492	36.4458	0
	High	APFDLFENR	1	3	1	IPI00784295.2		0	0	0.00017072	2.54789	0	2	1108.54	0.589042	37.2538	0
	High	HSQFIGYPITLFVEK	2	4	1	IPI00784295.2		0	0	3.43155e-07	2.61616	0	2	1778.95	-0.801997	42.0934	0
IPI00023598.2	Tubulin beta-4 chain	133.174	51.8	5	2	20	60	444	49.5539	4.88135
	A2	Sequence	# PSMs	# Proteins	# Protein Groups	Protein Group Accessions	Modifications	ΔCn	q-Value	PEP	XCorr	Probability	Charge	MH+ [Da]	ΔM [ppm]	RT [min]	# Missed Cleavages
	Low	YLTVAAVFr	1	13	4	IPI00007752.1;IPI00023598.2;IPI00645452.1;IPI00909140.9	R9(Methyl)	0.1171			1.95656	0	2	1053.61	-0.466134	40.786	0
	High	ISEQFTAmFR	3	21	5	IPI00007752.1;IPI00013475.1;IPI00023598.2;IPI00645452.1;IPI00909140.9	M8(Oxidation)	0	0	2.3385e-06	2.55998	0	2	1245.59	1.08847	32.7703	0
	High	KLAVNmVPFPR	1	33	5	IPI00007752.1;IPI00013475.1;IPI00645452.1;IPI00909140.9;IPI00023598.2	M6(Oxidation)	0	0	2.24429e-09	2.65482	0	2	1287.72	-0.45498	32.6099	1
	High	LAVNmVPFPR	5	33	5	IPI00007752.1;IPI00013475.1;IPI00645452.1;IPI00909140.9;IPI00023598.2	M5(Oxidation)	0	0	5.94779e-08	3.02814	0	2	1159.63	-0.716378	33.6728	0
	High	LHFFmPGFAPLTSR	4	26	5	IPI00007752.1;IPI00013475.1;IPI00023598.2;IPI00645452.1;IPI00909140.9	M5(Oxidation)	0	0	2.66555e-12	3.10045	0	2	1636.83	1.47055	39.321	0
	High	NmmAAcDPR	2	30	5	IPI00007752.1;IPI00013475.1;IPI00023598.2;IPI00645452.1;IPI00909140.9	M2(Oxidation); M3(Oxidation); C6(Carbamidomethyl)	0	0.001402	0.0132209	1.92581	0	2	1097.42	-0.269281	17.7162	0
	High	ImNTFSVVPSPK	2	13	4	IPI00007752.1;IPI00023598.2;IPI00645452.1;IPI00909140.9	M2(Oxidation)	0	0	7.21676e-11	2.54829	0	2	1335.7	1.12304	31.5105	0
	High	LTTPTYGDLNHLVSATmSGVTTcLR	2	16	5	IPI00007752.1;IPI00013475.1;IPI00023598.2;IPI00645452.1;IPI00909140.9	M17(Oxidation); C23(Carbamidomethyl)	0	0	3.85401e-16	4.81143	0	3	2724.33	-2.15268	38.0147	0
	High	AVLVDLEPGTmDSVR	1	10	2	IPI00007752.1;IPI00023598.2	M11(Oxidation)	0	0	9.25791e-14	2.70881	0	2	1617.81	-1.20175	33.5326	0
	High	ALTVPELTQQmFDAK	1	11	2	IPI00007752.1;IPI00023598.2	M11(Oxidation)	0	0	1.73948e-09	2.11339	0	2	1707.86	1.46814	34.7757	0
	High	mREIVHLQAGQcGNQIGAK	3	17	3	IPI00013475.1;IPI00007752.1;IPI00023598.2	M1(Oxidation); C12(Carbamidomethyl)	0	0	3.85401e-16	4.22712	0	3	2126.06	-1.33889	27.8497	1
	High	TAVcDIPPR	16	22	5	IPI00007752.1;IPI00013475.1;IPI00023598.2;IPI00645452.1;IPI00909140.9	C4(Carbamidomethyl)	0	0.000208	0.00153002	2.30123	0	2	1028.52	-0.0589118	26.002	0
	High	EIVHLQAGQcGNQIGAK	2	17	3	IPI00007752.1;IPI00023598.2;IPI00013475.1	C10(Carbamidomethyl)	0	0	0.00017072	1.89526	0	3	1822.92	0.513997	27.867	0
	Low	GSQQYR	1	32	5	IPI00007752.1;IPI00013475.1;IPI00023598.2;IPI00645452.1;IPI00909140.9		0	0.096073	1	1.64627	0	2	738.353	0.263665	17.7094	0
	Medium	IREEFPDR	1	3	1	IPI00023598.2		0	0.044847	0.436118	1.77219	0	2	1061.54	0.375018	26.6944	1
	High	FPGQLNADLRK	8	34	5	IPI00007752.1;IPI00013475.1;IPI00645452.1;IPI00909140.9;IPI00023598.2		0	0	2.71514e-12	2.40802	0	3	1258.69	-0.581931	30.222	1
	High	FPGQLNADLR	3	34	5	IPI00007752.1;IPI00013475.1;IPI00645452.1;IPI00909140.9;IPI00023598.2		0	0	8.77509e-10	3.04897	0	2	1130.6	1.00995	32.138	0
	High	YLTVAAVFR	1	13	4	IPI00007752.1;IPI00023598.2;IPI00645452.1;IPI00909140.9		0	0	0.00017072	2.49912	0	2	1039.59	-0.800635	38.4395	0
	High	NSSYFVEWIPNNVK	1	23	5	IPI00007752.1;IPI00013475.1;IPI00023598.2;IPI00645452.1;IPI00909140.9		0	0.000208	0.00017072	1.96253	0	2	1696.83	-2.84572	39.0092	0
	High	SGPFGQIFRPDNFVFGQSGAGNNWAK	1	10	5	IPI00007752.1;IPI00013475.1;IPI00023598.2;IPI00645452.1;IPI00909140.9		0	0	4.15255e-16	2.92205	0	3	2798.34	-1.36385	41.3216	0
	High	GHYTEGAELVDAVLDVVR	1	3	1	IPI00023598.2		0	0	4.69894e-08	2.62795	0	3	1942.99	-0.910295	45.7958	0
IPI00008524.1	Isoform 1 of Polyadenylate-binding protein 1	130.847	60.85	25	23	43	96	636	70.6259	9.49561
	A2	Sequence	# PSMs	# Proteins	# Protein Groups	Protein Group Accessions	Modifications	ΔCn	q-Value	PEP	XCorr	Probability	Charge	MH+ [Da]	ΔM [ppm]	RT [min]	# Missed Cleavages
	Low	KVFVGr	1	11	2	IPI00008524.1;IPI00555747.1	R6(Dimethyl)	0.2128			0.738339	0	2	733.473	1.51166	29.9701	1
	Low	qIYVGrAQKK	2	8	1	IPI00008524.1	N-Term(Gln->pyro-Glu); R6(Dimethyl)	0.3918			0.586408	0	3	1201.69	-12.0953	23.9536	2
	High	qAHLTNQYmQR	2	6	1	IPI00008524.1	N-Term(Gln->pyro-Glu); M9(Oxidation)	0	0	3.74021e-05	2.05459	0	2	1388.64	-0.862114	24.8861	0
	Low	qmLGER	1	15	2	IPI00008524.1;IPI00555747.1	N-Term(Gln->pyro-Glu); M2(Oxidation)	0	0.085057	1	1.5003	0	2	732.335	1.21322	22.4814	0
	Low	qTELKR	4	8	1	IPI00008524.1	N-Term(Gln->pyro-Glu)	0	0.11382	1	1.12055	0	2	757.421	0.75612	21.7967	1
	Low	kFEQMKQDR	1	7	1	IPI00008524.1	N-Term(Gln->pyro-Glu)	0.129			0.536083	0	2	1192.57	-3.42298	31.7038	2
	High	VANTSTQTmGPrPAAAAAAATPAVR	9	7	1	IPI00008524.1	M9(Oxidation); R12(Dimethyl)	0	0	3.85401e-16	4.84187	0	3	2425.26	-0.907393	26.5623	0
	High	LFPLIQAmHPTLAGK	4	8	1	IPI00008524.1	M8(Oxidation)	0	0	4.10048e-16	2.88414	0	3	1652.92	-1.182	36.6246	0
	High	NFGEDmDDER	1	7	1	IPI00008524.1	M6(Oxidation)	0	0	3.21523e-05	1.62984	0	2	1243.45	-0.157442	23.2301	0
	High	NFGEDmDDERLKDLFGK	1	7	1	IPI00008524.1	M6(Oxidation)	0	0	0.000146598	1.68666	0	3	2044.92	-1.74657	35.3018	2
	Low	KFEQmK	2	7	1	IPI00008524.1	M5(Oxidation)	0	0.315968	1	0.522075	0	2	826.413	0.186506	18.6639	1
	High	KFEQmKQDR	4	7	1	IPI00008524.1	M5(Oxidation)	0	0.000208	0.00017072	2.01334	0	2	1225.6	-0.226508	19.3214	2
	High	ALDTmNFDVIK	2	15	2	IPI00008524.1;IPI00555747.1	M5(Oxidation)	0	0	8.6669e-15	2.68277	0	2	1282.63	-1.06488	33.5429	0
	High	ITGmLLEIDNSELLHmLESPESLR	1	15	2	IPI00008524.1;IPI00555747.1	M4(Oxidation); M16(Oxidation)	0	0	3.85401e-16	3.43428	0	3	2772.38	-0.000196976	41.8097	0
	Low	VmMEGGrSK	2	7	1	IPI00008524.1	M2(Oxidation); R7(Methyl)	0.4965			0.707667	0	2	1024.49	2.51817	24.0321	1
	Low	VmmEGGR	1	7	1	IPI00008524.1	M2(Oxidation); M3(Oxidation)	0	0.083548	1	0.638558	0	2	811.344	0.357973	15.7719	0
	High	VmTDESGK	2	7	1	IPI00008524.1	M2(Oxidation)	0	0.000208	0.00156116	1.09847	0	2	882.388	0.761328	15.5772	0
	Medium	ImWSQR	1	19	2	IPI00008524.1;IPI00555747.1	M2(Oxidation)	0	0.033155	0.394566	0.952731	0	2	836.407	-1.24473	27.1216	0
	High	mNGmLLNDRK	2	12	2	IPI00008524.1;IPI00555747.1	M1(Oxidation); M4(Oxidation)	0	0.000208	0.00017072	1.98309	0	2	1223.59	-0.977619	23.8706	1
	High	GFGFVcFSSPEEATK	1	14	2	IPI00008524.1;IPI00555747.1	C6(Carbamidomethyl)	0	0	1.17572e-12	3.01421	0	2	1662.75	0.635757	37.7211	0
	High	VVcDENGSK	1	10	2	IPI00008524.1;IPI00555747.1	C3(Carbamidomethyl)	0	0	0.00017072	1.67213	0	2	1007.44	-1.46362	16.6821	0
	High	ALYDTFSAFGNILScK	1	12	2	IPI00008524.1;IPI00555747.1	C15(Carbamidomethyl)	0	0	1.3035e-06	1.87086	0	2	1806.87	-1.39038	42.4879	0
	High	FGPALSVK	6	7	1	IPI00008524.1		0	0.000208	0.00017072	1.50661	0	2	818.477	0.431644	31.012	0
	Medium	DPSLRK	2	16	2	IPI00008524.1;IPI00555747.1		0.0072	0.045904	0.436118	1.36875	0	2	715.409	-0.732467	20.2603	1
	High	EREAELGAR	2	9	1	IPI00008524.1		0	0.000208	0.00017072	2.65171	0	2	1030.53	1.87022	22.349	1
	High	NLDDGIDDER	2	6	1	IPI00008524.1		0	0	0.00017072	2.02715	0	2	1161.5	0.190696	26.15	0
	Low	AVNSATGVPTV	2	10	1	IPI00008524.1		0	0.054473	0.513534	1.13625	0	2	1015.54	-0.524745	28.5047	0
	High	AKEFTNVYIK	2	11	2	IPI00008524.1;IPI00555747.1		0	0.000208	0.00017072	1.51453	0	2	1212.66	0.149988	30.4501	1
	High	YQGVNLYVK	3	8	1	IPI00008524.1		0	0	4.34181e-06	2.01801	0	2	1083.59	3.34109	31.2246	0
	High	SKVDEAVAVLQAHQAK	3	10	1	IPI00008524.1		0	0	3.85401e-16	4.82684	0	2	1693.92	-0.418171	31.3488	1
	High	EFTNVYIK	2	11	2	IPI00008524.1;IPI00555747.1		0	0.003051	0.0324776	1.77679	0	2	1013.53	1.51409	31.4856	0
	High	SGVGNIFIK	3	11	1	IPI00008524.1		0	0	2.13842e-06	3.20296	0	2	934.536	0.262131	33.9892	0
	High	IVATKPLYVALAQR	5	7	1	IPI00008524.1		0	0	3.85401e-16	3.39061	0	2	1542.94	-0.394407	34.9923	0
	High	EFSPFGTITSAK	2	7	1	IPI00008524.1		0	0	4.16024e-07	2.33137	0	2	1284.65	-0.633222	35.8345	0
	High	FSPAGPILSIR	3	14	1	IPI00008524.1		0	0	6.8717e-05	2.52831	0	2	1157.67	-1.69498	36.4557	0
	High	GFGFVSFER	3	7	1	IPI00008524.1		0	0.000208	0.00017072	2.01693	0	2	1045.51	-0.964533	37.9915	0
	Medium	EAELGAR	1	9	1	IPI00008524.1		0	0.011207	0.0920225	2.02133	0	2	745.384	-0.304151	21.4272	0
	Low	TVPQYK	1	8	1	IPI00008524.1		0	0.12015	1	1.15057	0	2	735.405	2.0337	22.074	0
	High	NLDDGIDDERLR	2	6	1	IPI00008524.1		0	0	3.92804e-05	1.51831	0	2	1430.69	-0.0223546	29.2714	1
	High	LKDLFGK	1	8	1	IPI00008524.1		0	0.00107	0.0099921	1.80669	0	2	820.494	1.44155	31.1223	1
	High	KSGVGNIFIK	1	11	1	IPI00008524.1		0	0.000208	0.00017072	2.35349	0	2	1062.63	0.00144276	32.139	1
	High	GYGFVHFETQEAAER	2	7	1	IPI00008524.1		0	0	9.99544e-11	2.71816	0	3	1740.8	0.462297	33.7679	0
	High	KEFSPFGTITSAK	1	7	1	IPI00008524.1		0	0	3.85401e-16	3.24765	0	2	1412.74	-0.229683	34.0529	1
	High	SLGYAYVNFQQPADAER	1	15	2	IPI00008524.1;IPI00555747.1		0	0	2.28408e-15	3.23799	0	2	1928.91	-0.968664	34.3422	0
IPI00305289.2	Kinesin-like protein KIF11	128.665	52.46	1	49	57	93	1056	119.085	5.64307
	A2	Sequence	# PSMs	# Proteins	# Protein Groups	Protein Group Accessions	Modifications	ΔCn	q-Value	PEP	XCorr	Probability	Charge	MH+ [Da]	ΔM [ppm]	RT [min]	# Missed Cleavages
	Low	LQMFDDPrNKr	1	1	1	IPI00305289.2	R8(Methyl); R11(Methyl)	0			0.622961	0	3	1447.76	5.8883	36.2538	2
	Low	RDLAAAr	1	1	1	IPI00305289.2	R7(Trimethyl)	0.5029			0.85515	0	2	814.479	-12.5697	31.3748	1
	Low	TPHVPYrESK	1	1	1	IPI00305289.2	R7(Dimethyl)	0.556			1.15096	0	2	1241.65	-8.54307	34.7221	1
	Low	TGGLADKSSrK	1	1	1	IPI00305289.2	R10(Trimethyl)	0.6478			0.80787	0	2	1161.65	-5.0908	35.8454	2
	High	qTHSQELcK	1	1	1	IPI00305289.2	N-Term(Gln->pyro-Glu); C8(Carbamidomethyl)	0	0.000746	0.00754079	2.52205	0	2	1113.5	-1.03256	20.922	0
	High	qcGNLTEDLK	1	1	1	IPI00305289.2	N-Term(Gln->pyro-Glu); C2(Carbamidomethyl)	0	0	2.11343e-05	2.73667	0	2	1160.53	1.41037	29.7848	0
	High	cRPFNLAER	1	1	1	IPI00305289.2	N-Term(Gln->pyro-Glu); C1(Carbamidomethyl)	0	0	4.81246e-06	2.91583	0	2	1145.55	0.172312	32.5607	0
	Low	vEETTEHLVTK	1	1	1	IPI00305289.2	N-Term(Gln->pyro-Glu)	0.753			0.833017	0	2	1268.61	-19.2714	22.0713	0
	High	NLNSLFNNmEELIK	1	1	1	IPI00305289.2	M9(Oxidation)	0	0	3.85401e-16	2.71615	0	2	1694.84	-1.31522	37.8182	0
	High	TTAATLmNAYSSR	2	1	1	IPI00305289.2	M7(Oxidation)	0	0	1.61686e-11	3.32446	0	2	1402.66	-2.80112	27.472	0
	High	TFTmEGER	2	1	1	IPI00305289.2	M4(Oxidation)	0	0.000746	0.00717472	1.54015	0	2	986.426	0.70697	22.6942	0
	High	AmLEVHK	2	1	1	IPI00305289.2	M2(Oxidation)	0	0.008473	0.0906327	1.281	0	2	843.44	0.544911	22.3963	0
	High	SHSVFSVTIHmK	1	1	1	IPI00305289.2	M11(Oxidation)	0	0	1.25673e-05	2.19963	0	2	1388.7	-1.32	30.4834	0
	High	mTFHSQK	1	1	1	IPI00305289.2	M1(Oxidation)	0	0.003188	0.0378207	1.28994	0	2	894.414	0.15846	19.1472	0
	Low	QTHSQELcK	1	1	1	IPI00305289.2	C8(Carbamidomethyl)	0	0.084635	1	0.88169	0	2	1130.53	0.441817	19.741	0
	High	FcALEEK	1	1	1	IPI00305289.2	C2(Carbamidomethyl)	0	0.001402	0.0122578	1.32575	0	2	896.418	-0.220785	27.0006	0
	High	FcADSDGFSQELR	1	1	1	IPI00305289.2	C2(Carbamidomethyl)	0	0	3.85401e-16	3.08339	0	2	1531.65	-0.00936369	31.9703	0
	High	KASAHSIVEcDPVRK	1	1	1	IPI00305289.2	C10(Carbamidomethyl)	0	0	9.29358e-11	1.88993	0	3	1696.88	-0.369886	25.8892	2
	Medium	DVSGLHSK	3	1	1	IPI00305289.2		0	0.014447	0.146758	0.958461	0	2	842.436	-0.939716	20.2139	0
	High	ILQDSLGGR	4	1	1	IPI00305289.2		0	0.000208	0.00017072	2.02506	0	2	958.53	-1.72706	27.4476	0
	High	TVLQELINVLK	3	1	1	IPI00305289.2		0	0	1.91491e-08	2.73047	0	2	1269.78	-1.41347	47.5103	0
	Medium	SGAVDKR	1	1	1	IPI00305289.2		0	0.023885	0.221121	1.6504	0	2	732.4	0.78913	15.7674	1
	Medium	SDLQNK	1	1	1	IPI00305289.2		0	0.011966	0.093539	1.15382	0	2	704.356	-2.27641	16.7649	0
	Low	HLQETK	3	1	1	IPI00305289.2		0	0.07552	0.926214	1.98793	0	2	755.403	-2.42613	17.9416	0
	High	ISQETEQR	3	1	1	IPI00305289.2		0	0.000208	0.00017072	1.51672	0	2	990.483	-1.97928	17.9441	0
	High	SKDIVNK	2	1	1	IPI00305289.2		0	0.000208	0.000852608	2.42143	0	2	803.462	0.182426	19.3579	1
	High	NFNQEGTK	3	1	1	IPI00305289.2		0	0.000208	0.000549055	1.56814	0	2	937.437	-0.581466	20.1963	0
	High	TQELETTQK	2	1	1	IPI00305289.2		0	0.000208	0.00028386	1.86806	0	2	1077.54	-1.47028	20.4211	0
	Medium	INSQLK	1	1	1	IPI00305289.2		0	0.036971	0.43224	1.46586	0	2	702.414	-0.977169	21.2932	0
	High	LVEESVK	2	1	1	IPI00305289.2		0	0.000746	0.00617237	1.36851	0	2	803.451	0.48571	22.9538	0
	High	HSDKLNGNLEK	1	1	1	IPI00305289.2		0	0	3.85401e-16	3.1831	0	2	1254.64	-0.499979	23.2921	1
	Low	TPHVPYR	1	1	1	IPI00305289.2		0	0.19242	1	1.06373	0	2	869.461	-1.56179	25.0629	0
	High	EYTEEIER	1	1	1	IPI00305289.2		0	0.000208	0.0002698	2.24269	0	2	1068.48	-0.693621	25.173	0
	High	GINTLER	2	1	1	IPI00305289.2		0	0.009634	0.0919447	1.39814	0	2	802.442	-0.255945	25.65	0
	High	NILNKPEVNQK	2	1	1	IPI00305289.2		0	0	7.4612e-06	1.68924	0	3	1296.73	0.144008	25.9422	0
	High	GKNIQVVVR	1	1	1	IPI00305289.2		0	0.002783	0.0268228	1.51015	0	2	1012.63	0.448584	26.3465	1
	High	SKVEETTEHLVTK	1	1	1	IPI00305289.2		0	0	3.85401e-16	2.79785	0	3	1500.79	-1.42431	26.4795	1
	Low	QIDVYR	1	1	1	IPI00305289.2		0	0.118128	1	0.972133	0	2	793.419	-1.34134	26.5528	0
	High	LLNTVEETTK	2	1	1	IPI00305289.2		0	0	2.1396e-08	2.42277	0	2	1147.62	0.416495	26.8711	0
	High	TSLTVADKIEDQKK	2	1	1	IPI00305289.2		0	0	0.00017072	2.09728	0	3	1575.86	0.244807	27.9781	2
	Medium	NIQVVVR	2	1	1	IPI00305289.2		0	0.031472	0.369942	1.39654	0	2	827.509	-0.428137	28.3534	0
	High	LDIPTGTTPQR	1	1	1	IPI00305289.2		0	0.000208	0.000218517	1.82724	0	2	1198.64	-0.351887	28.3248	0
	High	LTDNGTEFSVK	1	1	1	IPI00305289.2		0	0	3.75772e-10	3.17396	0	2	1210.59	-1.64888	28.5293	0
	High	IGAVEEELNR	2	1	1	IPI00305289.2		0	0	5.42621e-07	2.7772	0	2	1129.58	-2.44555	28.5783	0
	High	EHLLDQLKR	4	1	1	IPI00305289.2		0	0.000208	0.00017072	2.66885	0	3	1151.65	-1.51907	29.4772	1
	High	ETTIDGEELVK	1	1	1	IPI00305289.2		0	0	0.00017072	2.02745	0	2	1233.62	-1.23128	29.5063	0
	High	AVDQHNAEAQDIFGK	3	1	1	IPI00305289.2		0	0	1.37502e-12	2.79072	0	3	1642.78	0.944853	29.8733	0
	High	TLHQIFEK	3	1	1	IPI00305289.2		0	0.000208	0.000366205	2.08713	0	2	1015.56	0.395267	30.3126	0
	High	VITALVER	4	1	1	IPI00305289.2		0	0.000208	0.00237217	2.25631	0	2	900.551	-0.230165	30.6284	0
	High	LLNTVEETTKDVSGLHSK	1	1	1	IPI00305289.2		0	0.000746	0.00593145	1.35891	0	3	1971.04	1.55364	31.6667	1
	High	NGVYISEENFR	1	1	1	IPI00305289.2		0	0	1.24219e-11	2.61429	0	2	1327.63	0.35411	31.6841	0
	High	SYLYPSTLVR	1	1	1	IPI00305289.2		0	0.000208	0.00221939	2.35889	0	2	1198.65	-0.523597	34.5163	0
	High	EAGNINQSLLTLGR	1	1	1	IPI00305289.2		0	0	8.91068e-16	3.62484	0	2	1485.8	-0.24765	34.9992	0
	High	GLEEITVHNKDEVYQILEK	1	1	1	IPI00305289.2		0	0	3.85401e-16	4.28244	0	3	2257.17	-1.06593	36.5375	1
	High	LNLVDLAGSENIGR	1	1	1	IPI00305289.2		0	0	3.85401e-16	3.81353	0	2	1470.79	1.51025	36.7296	0
	High	EEYITSALESTEEKLHDAASK	1	1	1	IPI00305289.2		0	0	3.85401e-16	3.6644	0	3	2351.12	-1.27552	38.0656	1
	High	LTVQEEQIVELIEK	1	1	1	IPI00305289.2		0	0	1.16961e-11	3.61254	0	3	1670.92	-1.05606	41.4069	0
	High	VSLLEIYNEELFDLLNPSSDVSER	1	1	1	IPI00305289.2		0	0	3.85401e-16	3.41012	0	3	2781.38	-1.0376	47.8799	0
IPI00867533.1	60S ribosomal protein L6	115.43	70.83	2	25	34	69	288	32.7216	10.6089
	A2	Sequence	# PSMs	# Proteins	# Protein Groups	Protein Group Accessions	Modifications	ΔCn	q-Value	PEP	XCorr	Probability	Charge	MH+ [Da]	ΔM [ppm]	RT [min]	# Missed Cleavages
	Low	YEITEQrK	1	2	1	IPI00867533.1	R7(Methyl)	0.4059			1.19768	0	2	1080.57	1.22014	30.1518	1
	Low	KMPrYYPTEDVPr	1	2	1	IPI00867533.1	R4(Trimethyl); R13(Methyl)	0.6825			0.672845	0	2	1707.86	-14.0278	34.7757	2
	Low	YSrSAMYSr	1	2	1	IPI00867533.1	R3(Dimethyl); R9(Methyl)	0.0658			0.712172	0	2	1162.59	15.5821	29.8847	1
	Low	eKrPEAK	1	1	1	IPI00867533.1	N-Term(Gln->pyro-Glu); R3(Dimethyl)	0			0.575441	0	2	868.49	1.70254	15.3147	1
	High	qLASGLLLVTGPLVLNRVPLRR	1	2	1	IPI00867533.1	N-Term(Gln->pyro-Glu)	0	0	0.000121778	3.29622	0	3	2368.45	-1.55213	46.0377	2
	High	qLASGLLLVTGPLVLNR	4	2	1	IPI00867533.1	N-Term(Gln->pyro-Glu)	0	0	3.96387e-16	4.12216	0	2	1747.04	-2.20456	47.3749	0
	Low	rPEAKK	1	1	1	IPI00867533.1	N-Term(Gln->pyro-Glu)	0.4663			0.948649	0	2	711.414	-1.2866	20.0187	1
	Low	YSRSAmYSrK	1	2	1	IPI00867533.1	M6(Oxidation); R9(Methyl)	0.5205			0.815161	0	2	1278.64	13.5063	24.3263	2
	Medium	SAmYSR	2	2	1	IPI00867533.1	M3(Oxidation)	0	0.046407	0.436118	0.93129	0	2	730.319	0.69454	18.0474	0
	Low	KmPrYYPTEDVPR	1	2	1	IPI00867533.1	M2(Oxidation); R4(Methyl)	0.6791			0.601605	0	3	1681.84	2.27904	25.9417	2
	High	KGKPHcSR	2	2	1	IPI00867533.1	C6(Carbamidomethyl)	0	0.000208	0.000759248	2.03587	0	2	969.506	0.893752	15.1463	1
	Medium	GKPHcSR	1	2	1	IPI00867533.1	C5(Carbamidomethyl)	0	0.030393	0.358964	1.44223	0	2	841.41	0.0859721	14.8304	0
	High	VEKPDTK	3	2	1	IPI00867533.1		0	0.000746	0.00614504	1.99794	0	2	816.445	-1.92741	17.1175	0
	High	KLLSHGK	2	2	1	IPI00867533.1		0	0.002638	0.0259383	2.07157	0	2	782.487	-1.71917	21.3556	1
	High	KPFSQHVR	3	2	1	IPI00867533.1		0	0.000208	0.000358398	2.49471	0	2	998.553	-0.340855	23.297	0
	High	YEITEQR	1	2	1	IPI00867533.1		0	0.000397	0.00496376	2.11348	0	2	938.457	-1.04064	24.4112	0
	High	EKYEITEQR	2	2	1	IPI00867533.1		0	0.000208	0.000173179	2.37203	0	2	1195.59	-0.507813	24.6997	1
	High	VLATVTKPVGGDK	2	2	1	IPI00867533.1		0	0	3.38051e-13	3.36114	0	2	1284.75	-1.2402	25.5463	0
	High	YYPTEDVPRK	2	2	1	IPI00867533.1		0	0.000208	0.000171117	1.75297	0	3	1267.63	0.976576	25.8147	1
	High	IDISNVK	3	2	1	IPI00867533.1		0	0.002007	0.0223755	1.68915	0	2	788.451	0.0764081	26.2914	0
	High	HQEGEIFDTEKEK	2	2	1	IPI00867533.1		0	0	3.85401e-16	3.62309	0	2	1589.74	-0.813829	26.7521	1
	High	EKVLATVTKPVGGDK	2	2	1	IPI00867533.1		0	0	3.85401e-16	3.28831	0	3	1541.89	0.187131	26.8414	1
	High	HQEGEIFDTEK	1	2	1	IPI00867533.1		0	0	7.39413e-16	3.17595	0	2	1332.61	0.125935	27.6447	0
	High	YYPTEDVPR	2	2	1	IPI00867533.1		0	0.000208	0.000170808	2.04688	0	2	1139.54	0.535142	27.7368	0
	High	HLTDAYFKK	4	2	1	IPI00867533.1		0	0.000208	0.00017072	2.37796	0	2	1122.59	-1.81777	28.1623	1
	High	FVIATSTK	2	2	1	IPI00867533.1		0	0.000208	0.00017072	1.98642	0	2	866.497	-1.07361	28.2326	0
	High	AVDSQILPK	3	2	1	IPI00867533.1		0	0.001402	0.0125187	1.70741	0	2	970.553	-3.53301	28.4086	0
	High	HLTDAYFK	2	2	1	IPI00867533.1		0	0	0.00017072	3.34981	0	2	994.501	1.44564	29.9552	0
	Low	RVVFLK	1	1	1	IPI00867533.1		0	0.665731	1	1.21634	0	2	761.503	-0.212663	30.5493	1
	High	HQEGEIFDTEKEKYEITEQR	2	2	1	IPI00867533.1		0	0	3.85401e-16	3.84834	0	3	2509.18	-0.191826	30.5756	2
	Low	IDISNVKIPK	1	2	1	IPI00867533.1		0	0.597426	1	0.505452	0	3	1126.68	1.45137	31.4127	1
	High	AIPQLQGYLR	2	2	1	IPI00867533.1		0	0.000208	0.00017072	2.01864	0	2	1158.66	-1.79089	35.3482	0
	High	SVFALTNGIYPHK	2	2	1	IPI00867533.1		0	0	4.42985e-16	3.34969	0	2	1446.77	-0.286244	35.6442	0
	High	QLASGLLLVTGPLVLNR	1	2	1	IPI00867533.1		0	0.005213	0.0570801	1.63846	0	2	1764.07	-1.80196	47.1431	0
	High	ASITPGTILIILTGR	6	2	1	IPI00867533.1		0	0	8.88247e-07	1.93196	0	2	1525.93	-0.293308	47.8388	0
	Low	KAMYKR	1	2	1	IPI00867533.1		0			0.59757	0	2	796.442	-10.2246	21.8264	2
IPI00792677.1	cDNA FLJ60097, highly similar to Tubulin alpha-ubiquitous chain	113.457	49.76	24	2	20	49	416	46.2838	5.08447
	A2	Sequence	# PSMs	# Proteins	# Protein Groups	Protein Group Accessions	Modifications	ΔCn	q-Value	PEP	XCorr	Probability	Charge	MH+ [Da]	ΔM [ppm]	RT [min]	# Missed Cleavages
	High	qLFHPEQLITGKEDAANNYAR	3	21	2	IPI00792677.1;IPI00180675.4	N-Term(Gln->pyro-Glu)	0	0	3.85401e-16	4.29053	0	3	2398.17	-1.93769	37.1336	1
	High	qLFHPEQLITGK	1	23	2	IPI00792677.1;IPI00180675.4	N-Term(Gln->pyro-Glu)	0	0	9.53266e-09	3.14245	0	2	1393.74	-1.83796	37.9804	0
	High	LDHKFDLmYAK	3	18	2	IPI00792677.1;IPI00180675.4	M8(Oxidation)	0	0	0.00017072	2.10353	0	2	1396.69	-0.412323	30.4263	1
	High	FDLmYAK	1	19	2	IPI00792677.1;IPI00180675.4	M4(Oxidation)	0	0.000397	0.00293541	1.279	0	2	903.428	-0.358995	30.7206	0
	High	YmAccLLYR	1	12	2	IPI00792677.1;IPI00180675.4	M2(Oxidation); C4(Carbamidomethyl); C5(Carbamidomethyl)	0	0	6.05517e-05	1.96685	0	2	1265.55	0.152338	32.3923	0
	High	SIQFVDWcPTGFK	1	5	1	IPI00792677.1	C8(Carbamidomethyl)	0	0	5.92026e-13	3.14403	0	2	1584.75	-0.976622	39.4647	0
	High	EDAANNYAR	2	24	2	IPI00792677.1;IPI00180675.4		0	0	3.22506e-05	2.32417	0	2	1023.45	-0.386246	20.4002	0
	High	DVNAAIATIK	4	10	2	IPI00180675.4;IPI00792677.1		0	0	2.72025e-07	2.87276	0	2	1015.58	0.964899	29.5669	0
	High	EIIDLVLDR	3	7	2	IPI00180675.4;IPI00792677.1		0	0.000208	0.00155393	2.09087	0	2	1085.62	-0.78389	38.5864	0
	High	LISQIVSSITASLR	5	13	1	IPI00792677.1		0	0	4.24926e-16	3.82057	0	2	1487.88	-1.00691	46.3071	0
	Medium	GHYTIGK	1	18	2	IPI00792677.1;IPI00180675.4		0	0.026984	0.305906	1.99237	0	2	775.408	-1.67327	23.428	0
	High	LSVDYGKK	2	16	2	IPI00792677.1;IPI00180675.4		0	0.000587	0.0053407	2.16057	0	2	909.503	-0.834343	24.6136	1
	High	RNLDIERPTYTNLNR	1	17	2	IPI00792677.1;IPI00180675.4		0	0	3.94614e-12	2.64707	0	3	1874.98	0.937164	29.7998	1
	High	NLDIERPTYTNLNR	4	17	2	IPI00792677.1;IPI00180675.4		0	0	3.85401e-16	3.47872	0	3	1718.88	0.622804	30.9687	0
	High	VGINYQPPTVVPGGDLAK	3	18	2	IPI00792677.1;IPI00180675.4		0	0	4.90075e-16	2.79162	0	2	1824.98	-0.730331	33.927	0
	High	TIGGGDDSFNTFFSETGAGK	2	12	2	IPI00180675.4;IPI00792677.1		0	0	2.68551e-15	2.4523	0	2	2007.89	-1.04711	37.4271	0
	High	IHFPLATYAPVISAEK	6	13	2	IPI00792677.1;IPI00180675.4		0	0	3.85401e-16	3.99518	0	3	1756.96	-0.665911	38.6939	0
	High	AVFVDLEPTVIDEVR	3	8	2	IPI00180675.4;IPI00792677.1		0	0	1.85765e-06	1.71899	0	3	1701.9	-2.19609	39.7505	0
	High	FDGALNVDLTEFQTNLVPYPR	2	17	2	IPI00792677.1;IPI00180675.4		0	0	2.48259e-10	2.45814	0	3	2409.21	0.73053	42.2473	0
	High	GHYTIGKEIIDLVLDR	1	7	2	IPI00180675.4;IPI00792677.1		0	0	7.99115e-08	2.04714	0	3	1842.01	-0.195131	44.6432	1
IPI00383296.5	Isoform 2 of Heterogeneous nuclear ribonucleoprotein M	113.227	50.65	4	32	37	108	691	73.5724	8.82178
	A2	Sequence	# PSMs	# Proteins	# Protein Groups	Protein Group Accessions	Modifications	ΔCn	q-Value	PEP	XCorr	Probability	Charge	MH+ [Da]	ΔM [ppm]	RT [min]	# Missed Cleavages
	Low	vGSEIErMGLVMDr	11	3	1	IPI00383296.5	N-Term(Gln->pyro-Glu); R7(Trimethyl); R14(Methyl)	0.7019			0.792817	0	2	1630.8	-17.342	36.6721	1
	Low	vGSEIErmGLVMDR	4	3	1	IPI00383296.5	N-Term(Gln->pyro-Glu); R7(Trimethyl); M8(Oxidation)	0.7124			0.667191	0	2	1632.78	-17.1819	34.6985	1
	High	qGGGGGGGSVPGIER	2	4	1	IPI00383296.5	N-Term(Gln->pyro-Glu)	0	0	7.73264e-13	3.73797	0	2	1267.6	-0.140193	25.9234	0
	Low	mGSGIER	1	3	1	IPI00383296.5	N-Term(Gln->pyro-Glu)	0.2			1.19524	0	2	732.335	1.20639	22.4814	0
	High	LGGAGmER	2	3	1	IPI00383296.5	M6(Oxidation)	0	0.000397	0.00312994	1.72144	0	2	806.382	-0.1022	18.9087	0
	High	FGSGmNmGR	2	4	1	IPI00383296.5	M5(Oxidation); M7(Oxidation)	0	0	0.000138602	1.85573	0	2	988.397	-0.629383	19.6187	0
	Low	AIEmER	4	3	1	IPI00383296.5	M4(Oxidation)	0	0.065049	0.711433	0.958219	0	2	764.359	-1.9975	19.1407	0
	Low	mGSGVEr	1	3	1	IPI00383296.5	M1(Oxidation); R7(Methyl)	0.3889			0.768386	0	2	765.357	0.702478	19.5053	0
	Low	mGLSMEr	1	3	1	IPI00383296.5	M1(Oxidation); R7(Methyl)	0.4128			1.01249	0	2	853.391	-0.170815	22.8535	0
	Low	mGPGIDr	4	3	1	IPI00383296.5	M1(Oxidation); R7(Dimethyl)	0.4235			0.982349	0	2	789.393	1.36043	22.2331	0
	High	mGAGLGHGmDR	2	3	1	IPI00383296.5	M1(Oxidation); M9(Oxidation)	0	0.00107	0.0093459	1.7507	0	2	1133.48	-3.23764	20.2267	0
	High	mGPLGLDHmASSIER	3	3	1	IPI00383296.5	M1(Oxidation); M9(Oxidation)	0	0	3.04069e-11	2.59618	0	3	1645.77	-0.583148	29.2739	0
	High	mVPAGmGAGLER	4	3	1	IPI00383296.5	M1(Oxidation); M6(Oxidation)	0	0.000397	0.00438963	1.49074	0	2	1220.58	-0.867123	24.1921	0
	High	mGLAmGGGGGASFDR	2	3	1	IPI00383296.5	M1(Oxidation); M5(Oxidation)	0	0	8.79149e-14	3.11782	0	2	1415.6	-0.707979	26.3252	0
	High	mGPAmGPALGAGIER	2	3	1	IPI00383296.5	M1(Oxidation); M5(Oxidation)	0	0	3.85401e-16	3.45138	0	2	1459.7	-4.19275	28.5622	0
	High	mGAGmGFGLER	3	3	1	IPI00383296.5	M1(Oxidation); M5(Oxidation)	0	0	0.00017072	1.74902	0	2	1157.51	-0.440155	28.9767	0
	High	mGLVmDR	1	3	1	IPI00383296.5	M1(Oxidation); M5(Oxidation)	0	0.003051	0.034575	1.71693	0	2	853.391	-0.176674	22.8535	0
	High	mGSGVER	2	3	1	IPI00383296.5	M1(Oxidation)	0	0.002007	0.0191438	1.37175	0	2	751.34	-0.632139	16.7624	0
	Medium	mGSGIER	1	3	1	IPI00383296.5	M1(Oxidation)	0	0.012071	0.094146	1.25889	0	2	765.357	0.702478	19.5053	0
	High	mAAPIDR	3	3	1	IPI00383296.5	M1(Oxidation)	0	0.006164	0.0745933	1.60177	0	2	789.392	-0.804503	21.0077	0
	High	mATGLER	4	3	1	IPI00383296.5	M1(Oxidation)	0	0.001879	0.0171733	1.3158	0	2	793.388	0.460779	21.4516	0
	High	mGPGIDR	3	3	1	IPI00383296.5	M1(Oxidation)	0	0.002783	0.0287644	1.37083	0	2	761.361	0.353871	21.3729	0
	High	mGPAIER	5	3	1	IPI00383296.5	M1(Oxidation)	0	0.000746	0.00705259	1.57175	0	2	789.392	-0.649865	22.0704	0
	High	mGANSLER	1	3	1	IPI00383296.5	M1(Oxidation)	0	0.000208	0.00017072	2.43654	0	2	893.412	-2.73035	21.0598	0
	High	KAcQIFVR	2	3	1	IPI00383296.5	C3(Carbamidomethyl)	0	0.000208	0.000701656	2.00769	0	2	1021.56	-0.827134	28.5395	1
	Medium	GcAVVEFK	2	4	1	IPI00383296.5	C2(Carbamidomethyl)	0	0.01287	0.107744	1.82198	0	2	909.435	-16.2167	28.9927	0
	High	GEGERPAQNEK	3	3	1	IPI00383296.5		0	0.000208	0.00017072	2.8023	0	2	1214.58	0.725023	16.8619	0
	High	VKEDPDGEHAR	2	4	1	IPI00383296.5		0	0	1.2828e-14	2.59469	0	3	1252.59	-0.229126	18.6572	1
	High	VGSEIER	4	3	1	IPI00383296.5		0	0.000917	0.00879145	1.65579	0	2	789.411	0.994375	21.5185	0
	Low	RGEIIAK	3	4	1	IPI00383296.5		0	0.200766	1	1.8289	0	2	786.483	-0.618768	22.9784	1
	High	HSLSGRPLK	4	4	1	IPI00383296.5		0	0.000746	0.00681364	1.98284	0	2	994.579	-0.255595	23.1777	0
	High	ADILEDKDGK	2	4	1	IPI00383296.5		0	0.000208	0.00017072	1.79424	0	2	1103.56	-0.0474584	24.9411	1
	High	FESPEVAER	4	3	1	IPI00383296.5		0	0	0.000124056	2.0136	0	2	1063.51	1.28089	26.5255	0
	High	FEPYANPTK	1	3	1	IPI00383296.5		0	0.000208	0.000351123	1.51174	0	2	1066.52	0.583573	26.8431	0
	High	GNFGGSFAGSFGGAGGHAPGVAR	2	3	1	IPI00383296.5		0	0	3.85401e-16	4.13682	0	3	2034.95	-0.892047	33.3397	0
	High	INEILSNALK	2	4	1	IPI00383296.5		0	0	1.85693e-07	2.62793	0	2	1114.65	-0.15191	33.9074	0
	High	LGSTVFVANLDYK	2	4	1	IPI00383296.5		0	0	1.00486e-08	2.74754	0	2	1426.76	-0.409056	36.0026	0
	High	AFITNIPFDVK	2	3	1	IPI00383296.5		0	0	2.56999e-08	2.57148	0	2	1264.69	-1.06979	38.8722	0
	Medium	IGSGVER	1	3	1	IPI00383296.5		0	0.01107	0.0919652	1.45183	0	2	717.389	-0.505809	20.5133	0
	High	FEPYANPTKR	2	3	1	IPI00383296.5		0	0.000208	0.000343722	1.93264	0	2	1222.62	-0.12744	26.4911	1
	Low	VGQTIER	2	3	1	IPI00383296.5		0.2378			1.4136	0	2	802.441	-0.940502	25.3723	0
IPI00180675.4	Tubulin alpha-1A chain	102.147	43.02	17	1	19	44	451	50.1036	5.05908
	A2	Sequence	# PSMs	# Proteins	# Protein Groups	Protein Group Accessions	Modifications	ΔCn	q-Value	PEP	XCorr	Probability	Charge	MH+ [Da]	ΔM [ppm]	RT [min]	# Missed Cleavages
	High	qLFHPEQLITGKEDAANNYAR	3	21	2	IPI00792677.1;IPI00180675.4	N-Term(Gln->pyro-Glu)	0	0	3.85401e-16	4.29053	0	3	2398.17	-1.93769	37.1336	1
	High	qLFHPEQLITGK	1	23	2	IPI00792677.1;IPI00180675.4	N-Term(Gln->pyro-Glu)	0	0	9.53266e-09	3.14245	0	2	1393.74	-1.83796	37.9804	0
	High	LDHKFDLmYAK	3	18	2	IPI00792677.1;IPI00180675.4	M8(Oxidation)	0	0	0.00017072	2.10353	0	2	1396.69	-0.412323	30.4263	1
	High	FDLmYAK	1	19	2	IPI00792677.1;IPI00180675.4	M4(Oxidation)	0	0.000397	0.00293541	1.279	0	2	903.428	-0.358995	30.7206	0
	High	YmAccLLYR	1	12	2	IPI00792677.1;IPI00180675.4	M2(Oxidation); C4(Carbamidomethyl); C5(Carbamidomethyl)	0	0	6.05517e-05	1.96685	0	2	1265.55	0.152338	32.3923	0
	High	EDAANNYAR	2	24	2	IPI00792677.1;IPI00180675.4		0	0	3.22506e-05	2.32417	0	2	1023.45	-0.386246	20.4002	0
	High	DVNAAIATIK	4	10	2	IPI00180675.4;IPI00792677.1		0	0	2.72025e-07	2.87276	0	2	1015.58	0.964899	29.5669	0
	High	EIIDLVLDR	3	7	2	IPI00180675.4;IPI00792677.1		0	0.000208	0.00155393	2.09087	0	2	1085.62	-0.78389	38.5864	0
	Medium	GHYTIGK	1	18	2	IPI00792677.1;IPI00180675.4		0	0.026984	0.305906	1.99237	0	2	775.408	-1.67327	23.428	0
	High	LSVDYGKK	2	16	2	IPI00792677.1;IPI00180675.4		0	0.000587	0.0053407	2.16057	0	2	909.503	-0.834343	24.6136	1
	High	RNLDIERPTYTNLNR	1	17	2	IPI00792677.1;IPI00180675.4		0	0	3.94614e-12	2.64707	0	3	1874.98	0.937164	29.7998	1
	High	NLDIERPTYTNLNR	4	17	2	IPI00792677.1;IPI00180675.4		0	0	3.85401e-16	3.47872	0	3	1718.88	0.622804	30.9687	0
	High	VGINYQPPTVVPGGDLAK	3	18	2	IPI00792677.1;IPI00180675.4		0	0	4.90075e-16	2.79162	0	2	1824.98	-0.730331	33.927	0
	High	TIGGGDDSFNTFFSETGAGK	2	12	2	IPI00180675.4;IPI00792677.1		0	0	2.68551e-15	2.4523	0	2	2007.89	-1.04711	37.4271	0
	High	IHFPLATYAPVISAEK	6	13	2	IPI00792677.1;IPI00180675.4		0	0	3.85401e-16	3.99518	0	3	1756.96	-0.665911	38.6939	0
	High	AVFVDLEPTVIDEVR	3	8	2	IPI00180675.4;IPI00792677.1		0	0	1.85765e-06	1.71899	0	3	1701.9	-2.19609	39.7505	0
	High	FDGALNVDLTEFQTNLVPYPR	2	17	2	IPI00792677.1;IPI00180675.4		0	0	2.48259e-10	2.45814	0	3	2409.21	0.73053	42.2473	0
	High	GHYTIGKEIIDLVLDR	1	7	2	IPI00180675.4;IPI00792677.1		0	0	7.99115e-08	2.04714	0	3	1842.01	-0.195131	44.6432	1
	High	LIGQIVSSITASLR	1	6	1	IPI00180675.4		0	0	4.23122e-16	3.45617	0	2	1457.87	-2.32486	45.1069	0
IPI00909232.1	cDNA FLJ53542, highly similar to Heterogeneous nuclear ribonucleoproteins C	95.6554	69.79	14	23	28	61	288	31.952	8.71924
	A2	Sequence	# PSMs	# Proteins	# Protein Groups	Protein Group Accessions	Modifications	ΔCn	q-Value	PEP	XCorr	Probability	Charge	MH+ [Da]	ΔM [ppm]	RT [min]	# Missed Cleavages
	Low	VSGNTSrR	1	6	1	IPI00909232.1	R7(Trimethyl)	0.5868			0.685676	0	2	918.506	-6.45447	29.8779	1
	High	qAVEmKNDK	1	7	1	IPI00909232.1	N-Term(Gln->pyro-Glu); M5(Oxidation)	0	0.000397	0.00319623	1.84675	0	2	1061.49	0.541419	17.9801	1
	High	qAVEmKNDKSEEEQSSSSVK	3	7	1	IPI00909232.1	N-Term(Gln->pyro-Glu); M5(Oxidation)	0	0	4.53332e-16	2.7251	0	3	2239	-0.717851	21.3212	2
	High	qKVDSLLENLEK	3	10	1	IPI00909232.1	N-Term(Gln->pyro-Glu)	0	0	3.71995e-13	3.44985	0	2	1398.75	-0.310556	37.2725	1
	Low	GAQGHmEcL	1	2	1	IPI00909232.1	M6(Oxidation); C8(Carbamidomethyl)	0			0.427537	0	2	1018.41	0.357975	23.45	0
	High	SAAEmYGSSFDLDYDFQR	1	3	1	IPI00909232.1	M5(Oxidation)	0	0	3.85401e-16	3.21891	0	2	2117.87	-2.75544	36.3753	0
	High	mYSYPAR	1	8	1	IPI00909232.1	M1(Oxidation)	0	0.001402	0.0120249	1.45037	0	2	903.403	-0.130291	23.845	0
	High	mIAGQVLDINLAAEPK	3	8	1	IPI00909232.1	M1(Oxidation)	0	0	3.85401e-16	4.34796	0	2	1698.91	-1.79207	35.8048	0
	High	IVGcSVHK	2	12	1	IPI00909232.1	C4(Carbamidomethyl)	0	0.000208	0.000274182	1.80254	0	2	899.475	-1.89119	21.1056	0
	High	VSGNTSR	2	6	1	IPI00909232.1		0	0.00107	0.0106535	1.70612	0	2	720.362	-1.79227	14.373	0
	High	IEKEQSK	2	10	1	IPI00909232.1		0	0.003188	0.0369452	1.8154	0	2	861.468	0.468824	15.1358	1
	Medium	KDETNVK	1	9	1	IPI00909232.1		0	0.0125	0.102863	2.30654	0	2	833.438	2.22894	15.8601	1
	High	SEEEQSSSSVK	1	8	1	IPI00909232.1		0	0	7.83262e-07	2.64119	0	2	1196.53	-1.12535	16.9926	0
	High	AAVAGEDGR	2	11	1	IPI00909232.1		0	0.000208	0.00017072	2.21379	0	2	845.412	0.733959	18.0406	0
	High	NDKSEEEQSSSSVK	1	7	1	IPI00909232.1		0	0	3.85401e-16	3.07115	0	2	1553.69	-1.13781	17.8163	1
	Medium	AVVPSKR	4	6	1	IPI00909232.1		0	0.03177	0.377512	1.6964	0	2	756.473	-0.144779	20.0625	1
	Low	DYYDR	2	13	2	IPI00909232.1;IPI00301503.8		0	0.129792	1	0.846546	0	2	731.3	0.56341	21.9831	0
	Low	ELTQIK	2	11	1	IPI00909232.1		0	0.128606	1	1.21419	0	2	731.431	1.39785	24.6867	0
	High	LKGDDLQAIKK	6	6	1	IPI00909232.1		0	0	3.85401e-16	3.19038	0	2	1228.73	-0.323721	25.9789	2
	High	VPPPPPIAR	7	8	1	IPI00909232.1		0	0.000208	0.00156712	1.34857	0	2	943.572	-0.890762	27.1388	0
	High	LKGDDLQAIK	2	9	1	IPI00909232.1		0	0.000208	0.000741839	1.58802	0	2	1100.63	-0.583854	27.5535	1
	High	KSDVEAIFSK	3	12	1	IPI00909232.1		0	0	5.21419e-10	4.10551	0	2	1123.6	0.752959	31.4818	1
	High	SDVEAIFSK	2	12	1	IPI00909232.1		0	0.000208	0.00017072	2.3792	0	2	995.506	1.33962	32.7681	0
	High	VDSLLENLEK	1	10	1	IPI00909232.1		0	0	1.43689e-06	2.43992	0	2	1159.62	-0.438578	35.5521	0
	High	VFIGNLNTLVVKK	1	13	1	IPI00909232.1		0	0	2.13077e-08	2.07015	0	2	1444.89	-1.07188	35.9427	1
	High	GFAFVQYVNER	2	7	1	IPI00909232.1		0	0	9.48856e-09	3.29432	0	2	1329.66	0.242051	37.0161	0
	High	VFIGNLNTLVVK	2	13	1	IPI00909232.1		0	0	8.84228e-13	2.49941	0	2	1316.79	-2.93804	38.2384	0
	Low	TDPRSMNSR	2	10	1	IPI00909232.1		0.6611			0.611406	0	2	1063.51	11.8896	26.31	1
IPI00000494.6	60S ribosomal protein L5	88.6135	68.01	2	22	30	51	297	34.3407	9.71533
	A2	Sequence	# PSMs	# Proteins	# Protein Groups	Protein Group Accessions	Modifications	ΔCn	q-Value	PEP	XCorr	Probability	Charge	MH+ [Da]	ΔM [ppm]	RT [min]	# Missed Cleavages
	Low	AQErAAES	1	2	1	IPI00000494.6	R4(Trimethyl)	0.6369			0.574811	0	2	903.467	15.0986	16.5466	1
	Low	RWNrPK	1	2	1	IPI00000494.6	R4(Methyl)	0			0.866521	0	2	870.504	-2.10049	26.2192	1
	Medium	qFSQYIK	1	2	1	IPI00000494.6	N-Term(Gln->pyro-Glu)	0	0.011437	0.0923834	2.06321	0	2	896.451	-0.592456	34.2065	0
	High	NSVTPDmmEEmYKK	1	2	1	IPI00000494.6	M7(Oxidation); M8(Oxidation); M11(Oxidation)	0	0.000208	0.00105302	1.68719	0	2	1750.73	0.417018	22.2763	1
	Low	LLNRFGmDK	1	2	1	IPI00000494.6	M7(Oxidation)	0.6842			0.658266	0	2	1109.57	-3.13475	36.8529	1
	High	IEGDmIVcAAYAHELPK	2	2	1	IPI00000494.6	M5(Oxidation); C8(Carbamidomethyl)	0	0	5.86246e-13	1.41186	0	3	1932.92	-0.927393	33.7415	0
	High	KHImGQNVADYmR	1	2	1	IPI00000494.6	M4(Oxidation); M12(Oxidation)	0	0	1.18401e-09	2.94761	0	3	1594.75	0.168045	24.1311	1
	High	HImGQNVADYmR	2	2	1	IPI00000494.6	M3(Oxidation); M11(Oxidation)	0	0	1.22458e-05	2.24993	0	3	1466.65	-0.0258343	24.8109	0
	High	YLmEEDEDAYKK	2	2	1	IPI00000494.6	M3(Oxidation)	0	0	3.85401e-16	3.45979	0	3	1549.67	-0.409146	25.3003	1
	High	mSLAQKK	2	2	1	IPI00000494.6	M1(Oxidation)	0	0.00479	0.0554817	2.20565	0	2	821.455	-0.213952	17.8646	1
	High	VTNRDIIcQIAYAR	2	2	1	IPI00000494.6	C8(Carbamidomethyl)	0	0	3.85401e-16	3.47363	0	2	1692.88	-0.725767	34.3005	1
	High	DIIcQIAYAR	2	2	1	IPI00000494.6	C4(Carbamidomethyl)	0	0	0.00017072	2.69424	0	2	1222.63	0.407737	34.4762	0
	High	VGLTNYAAAYcTGLLLAR	3	2	1	IPI00000494.6	C11(Carbamidomethyl)	0	0	0.00017072	1.95641	0	2	1927	-2.97606	40.8538	0
	Low	DRVAQK	1	2	1	IPI00000494.6		0	0.636082	1	1.66188	0	2	716.406	1.46866	15.2643	1
	High	NKYNTPK	1	1	1	IPI00000494.6		0	0.00954	0.0918172	1.40932	0	2	864.458	0.886314	19.2512	1
	High	KAHAAIR	1	2	1	IPI00000494.6		0	0.002783	0.0273939	2.38598	0	2	766.468	-0.348558	19.3398	1
	Medium	ENPVYEK	3	2	1	IPI00000494.6		0	0.019769	0.171734	1.83463	0	2	878.426	0.290837	22.292	0
	Low	WNRPK	1	2	1	IPI00000494.6		0	0.232569	1	0.899923	0	2	700.39	0.889028	22.43	0
	High	TDYYAR	2	1	1	IPI00000494.6		0	0.00927	0.0916163	1.38889	0	2	788.357	-0.856571	22.7714	0
	High	LVIQDKNK	1	1	1	IPI00000494.6		0	0.000208	0.000237525	1.81615	0	2	957.573	0.255172	23.0817	1
	High	EFNAEVHRK	3	2	1	IPI00000494.6		0	0	4.70608e-06	2.16515	0	3	1129.57	-0.141291	23.1625	1
	High	EFNAEVHR	2	2	1	IPI00000494.6		0	0.000208	0.000183896	1.98828	0	2	1001.48	-0.299001	24.4958	0
	Medium	LVIQDK	2	1	1	IPI00000494.6		0	0.023193	0.210254	1.189	0	2	715.434	-1.0786	24.9435	0
	Low	RLVIQDK	1	1	1	IPI00000494.6		0	0.42843	1	2.16271	0	2	871.537	1.02294	25.763	1
	High	RFPGYDSESK	3	2	1	IPI00000494.6		0	0	1.07312e-13	3.31817	0	2	1185.55	-0.314718	26.2983	1
	High	FPGYDSESK	2	2	1	IPI00000494.6		0	0.000208	0.000370836	1.39605	0	2	1029.45	0.867809	26.715	0
	Low	KASFLR	1	2	1	IPI00000494.6		0.0051	0.106543	1	1.97157	0	2	721.434	-2.08294	27.198	1
	High	GAVDGGLSIPHSTK	3	2	1	IPI00000494.6		0	0	1.84866e-14	3.45438	0	2	1338.7	-0.585828	28.2766	0
	High	GAVDGGLSIPHSTKR	1	2	1	IPI00000494.6		0	0	3.97525e-13	2.79515	0	3	1494.8	0.211528	27.853	1
	Medium	QFSQYIK	1	2	1	IPI00000494.6		0	0.048285	0.436615	1.2969	0	2	913.478	0.154982	29.5296	0
	Low	KDRVAQK	1	2	1	IPI00000494.6		0			0.745881	0	2	844.489	-13.3527	18.0726	2
IPI00008530.1	60S acidic ribosomal protein P0	84.4672	59.31	5	18	19	40	317	34.2518	5.97314
	A2	Sequence	# PSMs	# Proteins	# Protein Groups	Protein Group Accessions	Modifications	ΔCn	q-Value	PEP	XCorr	Probability	Charge	MH+ [Da]	ΔM [ppm]	RT [min]	# Missed Cleavages
	Low	qmQQIR	2	5	1	IPI00008530.1	N-Term(Gln->pyro-Glu); M2(Oxidation)	0	0.104623	1	1.76343	0	2	802.387	-1.38972	20.3157	0
	High	cFIVGADNVGSK	2	4	1	IPI00008530.1	N-Term(Gln->pyro-Glu); C1(Carbamidomethyl)	0	0	6.3414e-07	2.7076	0	2	1249.59	-2.274	36.5363	0
	High	EDLTEIRDmLLANK	2	4	1	IPI00008530.1	M9(Oxidation)	0	0.000208	0.000177352	2.12398	0	3	1676.85	-1.56822	36.1438	1
	High	EDLTEIRDmLLANKVPAAAR	2	4	1	IPI00008530.1	M9(Oxidation)	0	0	3.85401e-16	5.09452	0	3	2242.19	-0.324852	36.2193	2
	High	AVVLmGK	2	2	1	IPI00008530.1	M5(Oxidation)	0	0.005213	0.0587642	1.35478	0	2	733.428	-0.173748	23.4801	0
	Low	QmQQIR	1	5	1	IPI00008530.1	M2(Oxidation)	0	0.154275	1	1.21838	0	2	819.416	1.62019	18.4195	0
	Medium	DmLLANK	1	4	1	IPI00008530.1	M2(Oxidation)	0	0.01947	0.171734	1.39908	0	2	820.423	-0.643783	24.3976	0
	High	AGAIAPcEVTVPAQNTGLGPEK	2	4	1	IPI00008530.1	C7(Carbamidomethyl)	0	0	3.85401e-16	2.81504	0	2	2180.1	0.62366	30.7788	0
	High	GHLENNPALEK	5	4	1	IPI00008530.1		0	0	0.00017072	1.76761	0	3	1221.62	-0.994116	24.6385	0
	High	EDLTEIR	1	5	1	IPI00008530.1		0	0.002007	0.0213681	1.66314	0	2	875.446	-1.23699	27.3602	0
	Medium	FLEGVR	1	3	1	IPI00008530.1		0	0.042931	0.436118	1.5899	0	2	720.402	-2.65985	28.5646	0
	Medium	LLPHIR	4	2	1	IPI00008530.1		0	0.023885	0.223595	1.54269	0	2	748.482	-1.48868	29.2409	0
	Medium	SNYFLK	2	4	1	IPI00008530.1		0	0.022095	0.185693	1.5799	0	2	771.404	-0.0392574	30.8772	0
	High	GNVGFVFTK	2	2	1	IPI00008530.1		0	0.000208	0.000782804	2.24508	0	2	968.521	1.4761	33.4799	0
	High	IIQLLDDYPK	2	4	1	IPI00008530.1		0	0	2.94225e-09	2.87175	0	2	1217.68	-0.702887	36.6654	0
	High	GNVGFVFTKEDLTEIR	1	2	1	IPI00008530.1		0	0	3.85401e-16	3.26554	0	3	1824.95	-0.167481	37.2984	1
	High	AFLADPSAFVAAAPVAAATTAAPAAAAAPAK	4	2	1	IPI00008530.1		0	0	3.85401e-16	5.45906	0	3	2752.47	-0.468273	39.0627	0
	High	GTIEILSDVQLIK	1	2	1	IPI00008530.1		0	0	3.39063e-12	2.82157	0	2	1428.83	-0.279505	40.0237	0
	High	VLALSVETDYTFPLAEK	1	2	1	IPI00008530.1		0	0	7.2822e-10	2.63055	0	2	1896	-1.02044	40.3432	0
	High	TSFFQALGITTK	2	4	1	IPI00008530.1		0	0	3.03533e-13	2.78513	0	2	1313.71	-0.203168	40.6933	0
IPI00550021.4	60S ribosomal protein L3	83.3472	65.01	7	29	38	68	403	46.0798	10.1841
	A2	Sequence	# PSMs	# Proteins	# Protein Groups	Protein Group Accessions	Modifications	ΔCn	q-Value	PEP	XCorr	Probability	Charge	MH+ [Da]	ΔM [ppm]	RT [min]	# Missed Cleavages
	High	qLEKDFSSmK	1	5	1	IPI00550021.4	N-Term(Gln->pyro-Glu); M9(Oxidation)	0	0.001402	0.0128544	1.44366	0	2	1211.56	-0.907126	28.9393	1
	Low	fQTmEEK	1	3	1	IPI00550021.4	N-Term(Gln->pyro-Glu); M4(Oxidation)	0			0.461426	0	2	911.367	-15.5142	24.9573	0
	Medium	VIAHTQmR	3	5	1	IPI00550021.4	M7(Oxidation)	0	0.013973	0.124102	1.42468	0	2	971.509	0.299238	19.1888	0
	Low	DFSSmKK	1	5	1	IPI00550021.4	M5(Oxidation)	0	0.057499	0.603691	1.08936	0	2	858.403	0.152912	18.9267	1
	High	KAHLmEIQVNGGTVAEK	2	6	1	IPI00550021.4	M5(Oxidation)	0	0	3.85401e-16	4.1976	0	3	1840.96	-0.897323	27.6173	1
	Low	KAFmGPLK	3	3	1	IPI00550021.4	M4(Oxidation)	0	0.510455	1	0.586009	0	2	907.507	0.291438	26.9291	1
	High	FQTmEEKK	2	3	1	IPI00550021.4	M4(Oxidation)	0	0.000208	0.00017072	1.45602	0	2	1056.5	0.715074	19.6985	1
	High	FQTmEEK	2	3	1	IPI00550021.4	M4(Oxidation)	0	0.004205	0.0488217	1.14259	0	2	928.409	0.484269	20.2687	0
	High	AHLmEIQVNGGTVAEK	2	6	1	IPI00550021.4	M4(Oxidation)	0	0	1.90691e-14	3.62647	0	3	1712.86	0.139797	28.1057	0
	Medium	AGmTHIVR	2	5	1	IPI00550021.4	M3(Oxidation)	0	0.029341	0.346011	1.86774	0	2	900.471	-1.23543	21.4108	0
	High	AFmGPLKK	2	3	1	IPI00550021.4	M3(Oxidation)	0	0.000208	0.000350401	1.67058	0	2	907.507	0.156927	26.205	1
	High	SINPLGGFVHYGEVTNDFVmLK	1	3	1	IPI00550021.4	M20(Oxidation)	0	0	5.66162e-13	2.71	0	3	2453.21	-2.03652	41.5022	0
	High	ERLEQQVPVNQVFGQDEmIDVIGVTK	1	6	1	IPI00550021.4	M18(Oxidation)	0	0	3.85401e-16	3.15835	0	3	2987.51	-0.87108	36.8246	1
	High	LEQQVPVNQVFGQDEmIDVIGVTK	1	6	1	IPI00550021.4	M16(Oxidation)	0	0	8.20578e-14	2.41555	0	3	2702.38	2.75707	37.2597	0
	High	KVAcIGAWHPAR	1	6	1	IPI00550021.4	C4(Carbamidomethyl)	0	0.000208	0.000912177	1.57405	0	3	1365.72	0.703751	29.848	1
	High	VAcIGAWHPAR	2	6	1	IPI00550021.4	C3(Carbamidomethyl)	0	0	7.73797e-06	2.06119	0	2	1237.63	-0.224098	30.5023	0
	Low	GcVVGTK	1	3	1	IPI00550021.4	C2(Carbamidomethyl)	0	0.086821	1	1.84822	0	2	720.371	0.215186	19.7444	0
	High	YcQVIR	3	5	1	IPI00550021.4	C2(Carbamidomethyl)	0	0.00349	0.0407503	1.68218	0	2	838.424	-0.227345	25.609	0
	High	TVFAEHISDEcKR	1	7	1	IPI00550021.4	C11(Carbamidomethyl)	0	0	6.78263e-11	1.70297	0	3	1591.75	0.118669	28.0265	1
	High	TVFAEHISDEcK	2	7	1	IPI00550021.4	C11(Carbamidomethyl)	0	0	5.50696e-05	1.97537	0	3	1435.65	-0.410477	28.5083	0
	High	SLLVQTK	3	3	1	IPI00550021.4		0	0.005474	0.0688207	1.17352	0	2	788.488	-0.00486751	27.556	0
	High	VAFSVAR	4	5	1	IPI00550021.4		0	0.005758	0.0732191	1.25406	0	2	749.428	-3.85952	28.413	0
	High	HGSLGFLPR	4	5	1	IPI00550021.4		0	0	2.91648e-09	2.31508	0	2	983.541	-1.00251	32.9685	0
	Medium	TEINKK	1	5	1	IPI00550021.4		0	0.020725	0.17264	1.92328	0	2	732.424	-1.78537	16.4233	1
	Low	IAKEEGA	2	3	1	IPI00550021.4		0			1.06778	0	2	717.377	-0.50647	18.0592	1
	High	EVDRPGSK	1	7	1	IPI00550021.4		0	0.000208	0.00017072	2.38508	0	2	887.458	-0.680787	17.8317	0
	Low	DRIAKEEGA	1	3	1	IPI00550021.4		0	0.427939	1	1.28166	0	2	988.506	-0.0772849	20.501	2
	High	FIDTTSK	2	4	1	IPI00550021.4		0	0.000917	0.00844598	1.3796	0	2	811.42	-0.122098	23.0743	0
	Low	KFSAPR	1	6	1	IPI00550021.4		0	0.098507	1	1.59098	0	2	705.404	-0.242367	23.283	1
	High	NNASTDYDLSDK	2	4	1	IPI00550021.4		0	0	2.16718e-09	2.97659	0	2	1342.57	-1.39371	25.001	0
	High	KSLLVQTK	1	3	1	IPI00550021.4		0	0.000208	0.00017072	2.78657	0	2	916.582	-0.8025	25.9435	1
	Low	VLTLRK	2	4	1	IPI00550021.4		0			1.31412	0	2	729.498	-0.356316	26.0221	1
	Medium	SLLVQTKR	1	3	1	IPI00550021.4		0	0.033696	0.409061	1.87034	0	2	944.588	-0.440224	26.9534	1
	High	IGQGYLIKDGK	1	4	1	IPI00550021.4		0	0.000208	0.00134676	1.33166	0	2	1191.67	0.114245	28.0384	1
	Low	RVLTLR	1	4	1	IPI00550021.4		0	0.143625	1	1.15923	0	2	757.505	0.56238	28.0578	1
	Low	KKAFTK	1	6	1	IPI00550021.4		0.1429			0.6562	0	2	722.444	-16.8	29.9017	2
	High	IGQGYLIK	1	4	1	IPI00550021.4		0	0.000208	0.00017072	2.36804	0	2	891.529	-0.71663	30.7954	0
	High	DDPSKPVHLTAFLGYK	2	5	1	IPI00550021.4		0	0	3.85401e-16	3.6086	0	3	1787.93	-1.10298	35.2399	0
	High	SFPKDDPSKPVHLTAFLGYK	2	5	1	IPI00550021.4		0	0	3.85401e-16	4.14301	0	3	2247.18	-2.38078	35.9526	1
	Low	FQTMEEK	1	3	1	IPI00550021.4		0.0625			0.453521	0	2	912.418	4.81995	15.7136	0
IPI00003362.3	78 kDa glucose-regulated protein	72.4804	47.4	6	25	33	44	654	72.2884	5.16064
	A2	Sequence	# PSMs	# Proteins	# Protein Groups	Protein Group Accessions	Modifications	ΔCn	q-Value	PEP	XCorr	Probability	Charge	MH+ [Da]	ΔM [ppm]	RT [min]	# Missed Cleavages
	Low	KDNrAVQK	1	1	1	IPI00003362.3	R4(Methyl)	0.1122			0.874805	0	2	972.572	13.648	28.286	2
	Low	LKErIDTR	1	1	1	IPI00003362.3	R4(Dimethyl)	0.4962			1.30703	0	2	1058.62	-10.34	35.6767	2
	Low	dNrAVQKLR	1	1	1	IPI00003362.3	N-Term(Gln->pyro-Glu); R3(Trimethyl)	0			0.791314	0	3	1124.64	-8.85968	21.682	2
	Low	lSLVAAmLLLLSAAr	1	2	1	IPI00003362.3	N-Term(Gln->pyro-Glu); M7(Oxidation); R15(Trimethyl)	0	0.170668	1	1.03613	0	2	1582.95	-7.34286	47.3817	0
	Medium	STmKPVQK	2	1	1	IPI00003362.3	M3(Oxidation)	0	0.022206	0.187966	1.00593	0	2	934.505	1.9549	16.1586	0
	High	DAGTIAGLNVmR	1	2	1	IPI00003362.3	M11(Oxidation)	0	0	0.000138979	2.12314	0	2	1233.63	-0.21278	29.5649	0
	High	TFAPEEISAmVLTK	1	2	1	IPI00003362.3	M10(Oxidation)	0	0	1.88537e-10	2.08744	0	2	1552.79	-1.59423	36.0902	0
	High	mVNDAEK	1	1	1	IPI00003362.3	M1(Oxidation)	0	0.007698	0.0877684	1.17659	0	2	822.368	2.16722	15.9128	0
	High	mKETAEAYLGK	1	2	1	IPI00003362.3	M1(Oxidation)	0	0	2.65823e-12	2.59587	0	2	1256.62	0.59234	26.6423	1
	Low	KTGKDVR	1	1	1	IPI00003362.3		0.3019			0.735004	0	2	803.472	-1.50065	16.392	2
	Low	ERIDTR	4	1	1	IPI00003362.3		0.0125			0.79153	0	2	789.41	-13.85	21.5415	1
	High	FAEEDKK	2	1	1	IPI00003362.3		0	0.000587	0.00523999	1.9455	0	2	866.427	1.18756	19.3147	1
	High	VEIIANDQGNR	4	33	4	IPI00304925.5;IPI00911039.1;IPI00003362.3;IPI00003865.1		0	0	1.95281e-12	2.95992	0	2	1228.63	-0.00158179	25.8498	0
	High	IINEPTAAAIAYGLDK	3	15	2	IPI00003362.3;IPI00003865.1		0	0	3.85401e-16	3.72199	0	2	1659.89	-0.208592	36.5328	0
	High	VTAEDKGTGNK	1	1	1	IPI00003362.3		0	0	5.1374e-05	1.96824	0	2	1119.57	1.55614	16.1401	1
	High	NQIGDKEK	1	1	1	IPI00003362.3		0	0.003051	0.0320468	1.81039	0	2	931.484	-0.938534	17.8363	1
	High	ALSSQHQAR	1	1	1	IPI00003362.3		0	0.000208	0.00017072	2.3673	0	2	997.516	-1.42707	18.1276	0
	High	ITITNDQNR	1	1	1	IPI00003362.3		0	0	2.2684e-05	2.52044	0	2	1074.55	0.254475	23.3327	0
	High	VLEDSDLKK	2	1	1	IPI00003362.3		0	0.000208	0.00017072	2.16754	0	2	1046.57	1.21633	24.095	1
	High	VYEGERPLTK	1	1	1	IPI00003362.3		0	0	9.06955e-07	2.10521	0	2	1191.64	-0.28456	24.554	0
	Medium	IQQLVK	1	1	1	IPI00003362.3		0	0.038664	0.436118	1.57944	0	2	728.466	-1.07824	25.2628	0
	High	LTPEEIER	1	4	1	IPI00003362.3		0	0.000208	0.00045278	1.75315	0	2	986.515	-0.231134	26.9692	0
	High	EFFNGKEPSR	1	1	1	IPI00003362.3		0	0.000397	0.00507445	1.77511	0	2	1210.59	0.773071	27.7224	1
	High	NQLTSNPENTVFDAKR	1	2	1	IPI00003362.3		0	0	2.43384e-13	3.49663	0	3	1833.91	-1.66984	30.155	1
	High	NQLTSNPENTVFDAK	1	2	1	IPI00003362.3		0	0	3.85401e-16	2.54373	0	2	1677.81	-1.09871	30.9519	0
	High	SQIFSTASDNQPTVTIK	1	1	1	IPI00003362.3		0	0	3.85401e-16	2.44091	0	2	1836.93	0.350879	31.6092	0
	High	ITPSYVAFTPEGER	1	2	1	IPI00003362.3		0	0	8.92682e-09	2.88741	0	2	1566.78	1.11854	33.4332	0
	High	KKELEEIVQPIISK	1	1	1	IPI00003362.3		0	0.000208	0.00244181	1.5208	0	3	1653.98	1.35299	33.5347	2
	High	VTHAVVTVPAYFNDAQR	1	2	1	IPI00003362.3		0	0	2.55954e-15	3.65108	0	3	1887.97	0.25029	33.7431	0
	High	NELESYAYSLK	1	1	1	IPI00003362.3		0	0	6.7615e-08	2.40775	0	2	1316.64	-0.195211	34.0456	0
	High	ELEEIVQPIISK	1	1	1	IPI00003362.3		0	0	8.04809e-09	2.27186	0	2	1397.79	0.212284	35.0499	0
	High	SDIDEIVLVGGSTR	1	1	1	IPI00003362.3		0	0	4.43736e-16	3.4667	0	2	1460.76	-2.08124	35.1074	0
	High	IINEPTAAAIAYGLDKR	1	2	1	IPI00003362.3		0	0	3.85401e-16	3.29294	0	3	1816	0.31448	35.8726	1
IPI00644224.2	cDNA FLJ54020, highly similar to Heterogeneous nuclear ribonucleoprotein U	69.0042	36.61	2	2	35	62	784	86.8064	6.43018
	A2	Sequence	# PSMs	# Proteins	# Protein Groups	Protein Group Accessions	Modifications	ΔCn	q-Value	PEP	XCorr	Probability	Charge	MH+ [Da]	ΔM [ppm]	RT [min]	# Missed Cleavages
	Low	RGVKRPr	3	4	2	IPI00644224.2;IPI00644079.4	R7(Methyl)	0	0.658225	1	0.433312	0	2	882.57	-5.49942	32.0663	2
	High	rGNmPQrGGGGGGSGGIGYPYPR	3	4	2	IPI00644224.2;IPI00644079.4	R1(Methyl); M4(Oxidation); R7(Trimethyl)	0	0	1.58088e-08	2.90505	0	4	2320.14	1.74444	28.3888	2
	Low	kMcLFAGFQr	1	4	2	IPI00644224.2;IPI00644079.4	N-Term(Gln->pyro-Glu); C3(Carbamidomethyl); R10(Dimethyl)	0.733			0.508969	0	2	1268.61	-12.6534	21.8392	1
	Low	kQMADTGK	2	4	2	IPI00644224.2;IPI00644079.4	N-Term(Gln->pyro-Glu)	0			0.698211	0	2	861.429	18.2424	16.4949	1
	Low	mSSSPVNVK	1	4	2	IPI00644224.2;IPI00644079.4	N-Term(Gln->pyro-Glu)	0			0.634082	0	2	931.465	10.329	20.3288	0
	Medium	qGQQQAGGDGK	1	2	1	IPI00644224.2	N-Term(Gln->pyro-Glu)	0	0.044613	0.436118	1.43207	0	2	1056.47	-0.139888	14.9761	0
	High	qGQQQAGGDGKTEQK	1	2	1	IPI00644224.2	N-Term(Gln->pyro-Glu)	0	0	8.78287e-08	3.12476	0	2	1542.71	-0.369209	16.3208	1
	Medium	AELmER	2	4	2	IPI00644224.2;IPI00644079.4	M4(Oxidation)	0	0.012183	0.0970495	1.22454	0	2	764.36	-0.879578	20.2435	0
	High	YNILGTNTImDK	1	4	2	IPI00644224.2;IPI00644079.4	M10(Oxidation)	0	0	2.12253e-10	2.91049	0	2	1398.69	0.269455	32.3129	0
	High	mmVAGFKK	2	4	2	IPI00644224.2;IPI00644079.4	M1(Oxidation); M2(Oxidation)	0	0.008869	0.0912939	1.12611	0	2	943.474	-0.382511	23.127	1
	High	mmVAGFK	1	4	2	IPI00644224.2;IPI00644079.4	M1(Oxidation); M2(Oxidation)	0	0.008869	0.091232	1.30586	0	2	815.378	-1.11716	25.0326	0
	High	mcLFAGFQR	1	4	2	IPI00644224.2;IPI00644079.4	M1(Oxidation); C2(Carbamidomethyl)	0	0.000208	0.00017072	2.08557	0	2	1145.52	0.540311	35.0648	0
	High	KAVVVcPK	2	4	2	IPI00644224.2;IPI00644079.4	C6(Carbamidomethyl)	0	0.000208	0.000171188	2.02766	0	2	900.533	-0.168201	22.8048	1
	Low	GKVcFEmK	2	4	2	IPI00644224.2;IPI00644079.4	C4(Carbamidomethyl); M7(Oxidation)	0	0.159624	1	0.773823	0	2	1014.48	0.620119	24.1727	1
	High	APQcLGK	1	4	2	IPI00644224.2;IPI00644079.4	C4(Carbamidomethyl)	0	0.000746	0.00758855	1.52329	0	2	773.397	-1.1408	20.2948	0
	Low	VcFEmK	1	9	3	IPI00402391.3;IPI00644224.2;IPI00644079.4	C2(Carbamidomethyl); M5(Oxidation)	0	0.100033	1	1.01076	0	2	829.357	-2.12979	24.3985	0
	High	KAEVEGK	4	4	2	IPI00644224.2;IPI00644079.4		0	0.00107	0.0116157	1.16496	0	2	760.421	1.5766	16.1168	1
	High	DIDIHEVR	4	4	2	IPI00644224.2;IPI00644079.4		0	0.000208	0.00253512	1.95517	0	2	996.511	-0.264507	27.5657	0
	High	DLPEHAVLK	5	4	2	IPI00644224.2;IPI00644079.4		0	0.000208	0.000175903	1.87557	0	2	1021.57	3.18054	27.7088	0
	High	NGQDLGVAFK	2	4	2	IPI00644224.2;IPI00644079.4		0	0	2.55848e-05	2.42033	0	2	1048.54	-0.192185	30.178	0
	High	FIEIAAR	3	4	2	IPI00644224.2;IPI00644079.4		0	0.000587	0.00554742	1.73263	0	2	819.472	-0.475761	30.6799	0
	High	HAAENPGK	2	4	2	IPI00644224.2;IPI00644079.4		0	0.000397	0.00290988	1.38505	0	2	823.405	-0.794754	15.1894	0
	Low	KALPPEKK	1	4	2	IPI00644224.2;IPI00644079.4		0	0.413207	1	0.711702	0	2	910.571	-1.62213	18.5365	2
	High	ASYGVSK	1	4	2	IPI00644224.2;IPI00644079.4		0	0.002007	0.0179372	1.45217	0	2	711.366	-1.23949	20.7577	0
	High	LLEQYKEESKK	2	4	2	IPI00644224.2;IPI00644079.4		0	0	5.37037e-11	2.86644	0	2	1394.75	-1.84528	25.1306	2
	High	VTEKIPVR	1	4	2	IPI00644224.2;IPI00644079.4		0	0.000208	0.000204702	2.38641	0	2	941.576	-1.71074	25.1538	1
	High	LLEQYKEESK	2	4	2	IPI00644224.2;IPI00644079.4		0	0	1.32491e-07	2.37793	0	2	1266.66	0.184117	25.5428	1
	High	VSELKEELKK	2	4	2	IPI00644224.2;IPI00644079.4		0	0	6.37475e-12	2.98237	0	2	1202.7	-0.0990205	25.7059	2
	High	VSELKEELK	1	4	2	IPI00644224.2;IPI00644079.4		0	0	1.20695e-07	2.75865	0	2	1074.6	0.115713	26.8367	1
	High	KAEVEGKDLPEHAVLK	1	4	2	IPI00644224.2;IPI00644079.4		0	0	3.85401e-16	4.34469	0	3	1762.97	-0.75514	27.7442	2
	High	LNTLLQR	1	4	2	IPI00644224.2;IPI00644079.4		0	0.003188	0.0367314	2.49274	0	2	857.521	0.368716	29.3533	0
	High	NFILDQTNVSAAAQR	2	4	2	IPI00644224.2;IPI00644079.4		0	0	3.85401e-16	3.20956	0	2	1647.84	-0.496097	33.0275	0
	High	GYFEYIEENKYSR	1	4	2	IPI00644224.2;IPI00644079.4		0	0	2.46537e-12	2.65168	0	2	1697.78	-2.25607	34.3727	1
	High	SSGPTSLFAVTVAPPGAR	1	4	2	IPI00644224.2;IPI00644079.4		0	0	1.91021e-12	2.49289	0	2	1714.91	-0.540406	37.0491	0
	High	EKPYFPIPEEYTFIQNVPLEDR	1	4	2	IPI00644224.2;IPI00644079.4		0	0	3.85401e-16	3.33579	0	3	2724.35	-0.371791	41.2717	0
IPI00644079.4	cDNA FLJ44920 fis, clone BRAMY3011501, highly similar to Heterogeneous nuclear ribonucleoprotein U	65.8795	40.27	2	1	35	62	750	83.033	8.79248
	A2	Sequence	# PSMs	# Proteins	# Protein Groups	Protein Group Accessions	Modifications	ΔCn	q-Value	PEP	XCorr	Probability	Charge	MH+ [Da]	ΔM [ppm]	RT [min]	# Missed Cleavages
	Low	RGVKRPr	3	4	2	IPI00644224.2;IPI00644079.4	R7(Methyl)	0	0.658225	1	0.433312	0	2	882.57	-5.49942	32.0663	2
	High	rGNmPQrGGGGGGSGGIGYPYPR	3	4	2	IPI00644224.2;IPI00644079.4	R1(Methyl); M4(Oxidation); R7(Trimethyl)	0	0	1.58088e-08	2.90505	0	4	2320.14	1.74444	28.3888	2
	Low	kMcLFAGFQr	1	4	2	IPI00644224.2;IPI00644079.4	N-Term(Gln->pyro-Glu); C3(Carbamidomethyl); R10(Dimethyl)	0.733			0.508969	0	2	1268.61	-12.6534	21.8392	1
	Low	kQMADTGK	2	4	2	IPI00644224.2;IPI00644079.4	N-Term(Gln->pyro-Glu)	0			0.698211	0	2	861.429	18.2424	16.4949	1
	Low	mSSSPVNVK	1	4	2	IPI00644224.2;IPI00644079.4	N-Term(Gln->pyro-Glu)	0			0.634082	0	2	931.465	10.329	20.3288	0
	Low	qGQQQAGGKK	1	2	1	IPI00644079.4	N-Term(Gln->pyro-Glu)	0	0.406699	1	0.516923	0	2	1012.51	-2.65817	14.5975	1
	Medium	AELmER	2	4	2	IPI00644224.2;IPI00644079.4	M4(Oxidation)	0	0.012183	0.0970495	1.22454	0	2	764.36	-0.879578	20.2435	0
	High	YNILGTNTImDK	1	4	2	IPI00644224.2;IPI00644079.4	M10(Oxidation)	0	0	2.12253e-10	2.91049	0	2	1398.69	0.269455	32.3129	0
	High	mmVAGFKK	2	4	2	IPI00644224.2;IPI00644079.4	M1(Oxidation); M2(Oxidation)	0	0.008869	0.0912939	1.12611	0	2	943.474	-0.382511	23.127	1
	High	mmVAGFK	1	4	2	IPI00644224.2;IPI00644079.4	M1(Oxidation); M2(Oxidation)	0	0.008869	0.091232	1.30586	0	2	815.378	-1.11716	25.0326	0
	High	mcLFAGFQR	1	4	2	IPI00644224.2;IPI00644079.4	M1(Oxidation); C2(Carbamidomethyl)	0	0.000208	0.00017072	2.08557	0	2	1145.52	0.540311	35.0648	0
	High	KAVVVcPK	2	4	2	IPI00644224.2;IPI00644079.4	C6(Carbamidomethyl)	0	0.000208	0.000171188	2.02766	0	2	900.533	-0.168201	22.8048	1
	Low	GKVcFEmK	2	4	2	IPI00644224.2;IPI00644079.4	C4(Carbamidomethyl); M7(Oxidation)	0	0.159624	1	0.773823	0	2	1014.48	0.620119	24.1727	1
	High	APQcLGK	1	4	2	IPI00644224.2;IPI00644079.4	C4(Carbamidomethyl)	0	0.000746	0.00758855	1.52329	0	2	773.397	-1.1408	20.2948	0
	Low	VcFEmK	1	9	3	IPI00402391.3;IPI00644224.2;IPI00644079.4	C2(Carbamidomethyl); M5(Oxidation)	0	0.100033	1	1.01076	0	2	829.357	-2.12979	24.3985	0
	High	KAEVEGK	4	4	2	IPI00644224.2;IPI00644079.4		0	0.00107	0.0116157	1.16496	0	2	760.421	1.5766	16.1168	1
	High	DIDIHEVR	4	4	2	IPI00644224.2;IPI00644079.4		0	0.000208	0.00253512	1.95517	0	2	996.511	-0.264507	27.5657	0
	High	DLPEHAVLK	5	4	2	IPI00644224.2;IPI00644079.4		0	0.000208	0.000175903	1.87557	0	2	1021.57	3.18054	27.7088	0
	High	NGQDLGVAFK	2	4	2	IPI00644224.2;IPI00644079.4		0	0	2.55848e-05	2.42033	0	2	1048.54	-0.192185	30.178	0
	High	FIEIAAR	3	4	2	IPI00644224.2;IPI00644079.4		0	0.000587	0.00554742	1.73263	0	2	819.472	-0.475761	30.6799	0
	High	HAAENPGK	2	4	2	IPI00644224.2;IPI00644079.4		0	0.000397	0.00290988	1.38505	0	2	823.405	-0.794754	15.1894	0
	Low	KALPPEKK	1	4	2	IPI00644224.2;IPI00644079.4		0	0.413207	1	0.711702	0	2	910.571	-1.62213	18.5365	2
	High	KAEGGGGGGRPGAPAAGDGK	1	2	1	IPI00644079.4		0	0.000208	0.00017072	1.44995	0	3	1666.83	-0.0999861	19.1405	1
	High	ASYGVSK	1	4	2	IPI00644224.2;IPI00644079.4		0	0.002007	0.0179372	1.45217	0	2	711.366	-1.23949	20.7577	0
	High	LLEQYKEESKK	2	4	2	IPI00644224.2;IPI00644079.4		0	0	5.37037e-11	2.86644	0	2	1394.75	-1.84528	25.1306	2
	High	VTEKIPVR	1	4	2	IPI00644224.2;IPI00644079.4		0	0.000208	0.000204702	2.38641	0	2	941.576	-1.71074	25.1538	1
	High	LLEQYKEESK	2	4	2	IPI00644224.2;IPI00644079.4		0	0	1.32491e-07	2.37793	0	2	1266.66	0.184117	25.5428	1
	High	VSELKEELKK	2	4	2	IPI00644224.2;IPI00644079.4		0	0	6.37475e-12	2.98237	0	2	1202.7	-0.0990205	25.7059	2
	High	VSELKEELK	1	4	2	IPI00644224.2;IPI00644079.4		0	0	1.20695e-07	2.75865	0	2	1074.6	0.115713	26.8367	1
	High	KAEVEGKDLPEHAVLK	1	4	2	IPI00644224.2;IPI00644079.4		0	0	3.85401e-16	4.34469	0	3	1762.97	-0.75514	27.7442	2
	High	LNTLLQR	1	4	2	IPI00644224.2;IPI00644079.4		0	0.003188	0.0367314	2.49274	0	2	857.521	0.368716	29.3533	0
	High	NFILDQTNVSAAAQR	2	4	2	IPI00644224.2;IPI00644079.4		0	0	3.85401e-16	3.20956	0	2	1647.84	-0.496097	33.0275	0
	High	GYFEYIEENKYSR	1	4	2	IPI00644224.2;IPI00644079.4		0	0	2.46537e-12	2.65168	0	2	1697.78	-2.25607	34.3727	1
	High	SSGPTSLFAVTVAPPGAR	1	4	2	IPI00644224.2;IPI00644079.4		0	0	1.91021e-12	2.49289	0	2	1714.91	-0.540406	37.0491	0
	High	EKPYFPIPEEYTFIQNVPLEDR	1	4	2	IPI00644224.2;IPI00644079.4		0	0	3.85401e-16	3.33579	0	3	2724.35	-0.371791	41.2717	0
IPI00021439.1	Actin, cytoplasmic 1	65.8663	50.93	41	15	16	33	375	41.7097	5.47803
	A2	Sequence	# PSMs	# Proteins	# Protein Groups	Protein Group Accessions	Modifications	ΔCn	q-Value	PEP	XCorr	Probability	Charge	MH+ [Da]	ΔM [ppm]	RT [min]	# Missed Cleavages
	High	qEYDESGPSIVHR	1	14	1	IPI00021439.1	N-Term(Gln->pyro-Glu)	0	0	3.92313e-13	3.56653	0	2	1499.68	-0.54794	27.9662	0
	High	DLTDYLmK	3	19	1	IPI00021439.1	M7(Oxidation)	0	0.000397	0.00297213	1.89435	0	2	1014.48	-1.04007	31.6997	0
	High	TTGIVmDSGDGVTHTVPIYEGYALPHAILR	1	5	1	IPI00021439.1	M6(Oxidation)	0	0	4.3216e-16	3.07246	0	3	3199.61	-1.22341	38.0245	0
	High	HQGVmVGmGQK	3	25	1	IPI00021439.1	M5(Oxidation); M8(Oxidation)	0	0.000208	0.000641401	1.98277	0	3	1203.56	-0.265244	20.3388	0
	High	DLYANTVLSGGTTmYPGIADR	2	8	1	IPI00021439.1	M14(Oxidation)	0	0	1.08415e-10	2.61804	0	3	2231.06	-2.43063	35.1686	0
	High	EITALAPSTmK	2	20	1	IPI00021439.1	M10(Oxidation)	0	0	6.43212e-07	2.35517	0	2	1177.61	-0.861076	27.3562	0
	Medium	cDVDIRK	1	8	1	IPI00021439.1	C1(Carbamidomethyl)	0	0.026984	0.305861	0.790957	0	2	905.451	-0.134781	22.3503	1
	High	AGFAGDDAPR	3	31	1	IPI00021439.1		0	0	2.43046e-06	2.27712	0	2	976.448	-0.500549	24.8589	0
	High	IIAPPER	3	21	1	IPI00021439.1		0	0.003051	0.0313184	1.72046	0	2	795.472	-0.566844	25.3918	0
	High	GYSFTTTAER	3	7	1	IPI00021439.1		0	0	7.3789e-05	2.29726	0	2	1132.53	-1.12928	28.1761	0
	High	DSYVGDEAQSK	2	25	1	IPI00021439.1		0	0	1.29391e-08	2.22401	0	2	1198.52	-0.523358	21.7684	0
	High	DSYVGDEAQSKR	1	25	1	IPI00021439.1		0	0	2.10836e-11	2.4072	0	2	1354.62	0.944976	22.1335	1
	Low	RGILTLK	1	29	1	IPI00021439.1		0	0.418715	1	2.00968	0	2	800.536	0.958159	31.0756	1
	High	AVFPSIVGRPR	3	30	1	IPI00021439.1		0	0	2.03702e-10	2.45275	0	3	1198.71	0.40629	33.1658	0
	High	VAPEEHPVLLTEAPLNPK	3	10	1	IPI00021439.1		0	0	3.85401e-16	2.68265	0	2	1954.06	-2.87392	33.82	0
	High	SYELPDGQVITIGNER	1	22	1	IPI00021439.1		0	0	1.11615e-12	2.25883	0	2	1790.89	-1.82693	35.8784	0
IPI00396485.3	Elongation factor 1-alpha 1	62.6739	31.82	12	12	15	42	462	50.1091	9.01221
	A2	Sequence	# PSMs	# Proteins	# Protein Groups	Protein Group Accessions	Modifications	ΔCn	q-Value	PEP	XCorr	Probability	Charge	MH+ [Da]	ΔM [ppm]	RT [min]	# Missed Cleavages
	Low	ErGITIDISLWK	1	10	1	IPI00396485.3	R2(Methyl)	0.7253			0.747733	0	2	1444.8	-9.00279	39.2515	1
	High	qTVAVGVIK	2	6	1	IPI00396485.3	N-Term(Gln->pyro-Glu)	0	0.008226	0.0890424	1.76107	0	2	897.54	-0.260232	30.8565	0
	High	VETGVLKPGmVVTFAPVNVTTEVK	1	5	1	IPI00396485.3	M10(Oxidation)	0	0	3.85401e-16	3.92272	0	3	2531.37	-3.33285	36.596	0
	Low	mDSTEPPYSQKr	1	4	1	IPI00396485.3	M1(Oxidation); R12(Dimethyl)	0	0.05544	0.538899	1.23592	0	3	1482.69	-0.62496	22.2645	1
	High	IGGIGTVPVGR	10	7	1	IPI00396485.3		0	0	1.00322e-05	2.83156	0	2	1025.61	1.43391	29.7469	0
	Low	RGNVAGDSK	1	7	1	IPI00396485.3		0	0.216047	1	1.46269	0	2	903.465	0.766072	15.9073	1
	High	KLEDGPK	5	6	1	IPI00396485.3		0	0.00107	0.0107468	1.65597	0	2	786.435	-0.525202	19.6857	1
	High	EVSTYIKK	1	5	1	IPI00396485.3		0	0.000397	0.00421472	1.66756	0	2	967.545	-0.584588	24.3994	1
	High	TIEKFEK	3	10	1	IPI00396485.3		0	0.000917	0.008183	1.73937	0	2	894.492	-0.751332	24.6424	1
	High	YEEIVK	1	5	1	IPI00396485.3		0	0.005213	0.0587657	1.54139	0	2	780.413	-0.568446	25.4882	0
	High	EVSTYIK	2	5	1	IPI00396485.3		0	0.008998	0.0913981	1.42607	0	2	839.45	-1.2563	26.2582	0
	High	STTTGHLIYK	4	10	1	IPI00396485.3		0	0	0.000128969	2.55754	0	2	1120.6	0.705127	26.6345	0
	Low	QTVAVGVIK	1	6	1	IPI00396485.3		0	0.062363	0.659993	1.28457	0	2	914.565	-1.72218	28.3607	0
	High	LPLQDVYK	6	8	1	IPI00396485.3		0	0.000208	0.00017072	2.15633	0	2	975.551	0.208866	31.7787	0
	High	YYVTIIDAPGHR	1	6	1	IPI00396485.3		0	0.000208	0.000314203	1.50226	0	3	1404.73	0.0819991	32.9375	0
	High	EHALLAYTLGVK	2	6	1	IPI00396485.3		0	0	1.48712e-14	3.63364	0	2	1314.74	-2.81323	36.0006	0
IPI00645078.1	Ubiquitin-like modifier-activating enzyme 1	61.0913	25.33	9	22	23	39	1058	117.774	5.75732
	A2	Sequence	# PSMs	# Proteins	# Protein Groups	Protein Group Accessions	Modifications	ΔCn	q-Value	PEP	XCorr	Probability	Charge	MH+ [Da]	ΔM [ppm]	RT [min]	# Missed Cleavages
	High	qLYVLGHEAmKR	1	6	1	IPI00645078.1	N-Term(Gln->pyro-Glu); M10(Oxidation)	0	0.00479	0.055982	1.08937	0	3	1443.74	-0.880961	33.3885	1
	High	LDQPmTEIVSR	2	3	1	IPI00645078.1	M5(Oxidation)	0	0	0.00017072	2.10421	0	2	1304.65	-1.78499	26.4886	0
	Low	mYmDrR	1	2	1	IPI00645078.1	M1(Oxidation); M3(Oxidation); R5(Methyl)	0			0.411901	0	2	917.404	7.45777	28.986	1
	High	VGEFcHNR	1	4	1	IPI00645078.1	C5(Carbamidomethyl)	0	0.000208	0.00017072	2.13998	0	2	1018.45	0.0135909	23.1842	0
	High	SIPIcTLK	2	2	1	IPI00645078.1	C5(Carbamidomethyl)	0	0.000746	0.00770236	1.28527	0	2	931.529	0.621368	30.6188	0
	High	YFLVGAGAIGcELLK	1	1	1	IPI00645078.1	C11(Carbamidomethyl)	0	0	3.85401e-16	3.08968	0	2	1610.86	-1.30298	42.2314	0
	High	AEVSQPR	2	6	1	IPI00645078.1		0	0.001713	0.0164272	1.26595	0	2	786.41	-0.275195	18.5437	0
	High	VGPDTER	2	2	1	IPI00645078.1		0	0.006452	0.0801818	1.00144	0	2	773.379	0.132598	19.2104	0
	High	LKSDTAAAAVR	2	2	1	IPI00645078.1		0	0	0.00017072	2.1544	0	2	1102.62	1.05835	22.7162	1
	High	LVVADTR	2	3	1	IPI00645078.1		0	0.001713	0.0165515	1.77482	0	2	773.452	-0.0460472	24.2375	0
	High	GGIVSQVK	2	1	1	IPI00645078.1		0	0.009905	0.0919447	1.27943	0	2	787.467	-0.852058	24.7756	0
	High	AENYDIPSADR	2	4	1	IPI00645078.1		0	0	0.000113273	2.40041	0	2	1250.56	-2.20859	26.5886	0
	High	KPLLESGTLGTK	2	2	1	IPI00645078.1		0	0	3.85401e-16	3.17939	0	2	1243.72	-0.635338	29.3725	0
	High	NIILGGVK	2	6	1	IPI00645078.1		0	0.000397	0.00448463	1.65289	0	2	813.52	0.47893	31.5313	0
	High	ALPAVQQNNLDEDLIRK	1	1	1	IPI00645078.1		0	0	9.8988e-05	2.06899	0	3	1937.04	-0.79918	33.0092	1
	High	ATLPSPDKLPGFK	2	3	1	IPI00645078.1		0	0.000917	0.00819677	1.41562	0	3	1370.77	-0.144058	33.4067	1
	High	LQTSSVLVSGLR	2	6	1	IPI00645078.1		0	0	3.90263e-08	2.49319	0	2	1259.73	0.991103	33.486	0
	High	LAGTQPLEVLEAVQR	4	3	1	IPI00645078.1		0	0	1.76073e-07	3.08528	0	3	1623.91	-0.678389	38.5598	0
	High	NGFLNLALPFFGFSEPLAAPR	2	4	1	IPI00645078.1		0	0	3.73094e-13	3.28207	0	3	2278.19	-4.06774	48.0394	0
	Medium	GLGVEIAK	1	6	1	IPI00645078.1		0	0.019883	0.171734	1.07272	0	2	786.472	0.234296	29.0883	0
	High	YDGQVAVFGSDLQEK	1	1	1	IPI00645078.1		0	0.000208	0.00017072	2.13298	0	2	1655.79	0.647803	33.3816	0
	High	NEEDAAELVALAQAVNAR	1	1	1	IPI00645078.1		0	0	3.85401e-16	3.30433	0	3	1883.94	-1.1102	39.6878	0
	High	SLVASLAEPDFVVTDFAK	1	1	1	IPI00645078.1		0	0	0.00017072	1.94766	0	2	1908.99	-2.75612	42.1001	0
IPI00449049.5	Poly [ADP-ribose] polymerase 1	59.6603	34.32	4	27	35	40	1014	113.012	8.88037
	A2	Sequence	# PSMs	# Proteins	# Protein Groups	Protein Group Accessions	Modifications	ΔCn	q-Value	PEP	XCorr	Probability	Charge	MH+ [Da]	ΔM [ppm]	RT [min]	# Missed Cleavages
	Low	EFrEISYLK	1	2	1	IPI00449049.5	R3(Dimethyl)	0.6218			0.72677	0	2	1212.66	-1.35996	30.3232	1
	Low	rLLWHGSr	1	2	1	IPI00449049.5	R1(Methyl); R8(Trimethyl)	0.4365			1.11171	0	2	1080.64	-0.044091	29.8406	1
	Low	qLHNRR	1	2	1	IPI00449049.5	N-Term(Gln->pyro-Glu)	0	0.619782	1	0.750422	0	2	806.437	-0.74001	20.0254	1
	High	qQVPSGESAILDR	1	2	1	IPI00449049.5	N-Term(Gln->pyro-Glu)	0	0	9.46801e-13	2.76064	0	2	1382.69	-0.363743	30.9348	0
	High	GIYFADmVSK	1	2	1	IPI00449049.5	M7(Oxidation)	0	0	9.21515e-06	1.66911	0	2	1146.55	1.44524	31.6109	0
	Medium	mIFDVESmKK	1	2	1	IPI00449049.5	M1(Oxidation); M8(Oxidation)	0	0.018859	0.171734	1.30318	0	2	1259.6	-3.0849	28.8111	1
	Low	mNKKmEEVK	1	2	1	IPI00449049.5	M1(Oxidation); M5(Oxidation)	0.7172			0.56279	0	2	1168.57	0.0913325	23.4474	2
	High	ASLcISTK	1	2	1	IPI00449049.5	C4(Carbamidomethyl)	0	0.000208	0.00017072	1.86273	0	2	879.461	0.799244	26.1872	0
	High	VcSTNDLK	1	2	1	IPI00449049.5	C2(Carbamidomethyl)	0	0.001552	0.0155869	1.35152	0	2	936.442	-3.97808	21.0466	0
	High	AEPVEVVAPR	3	2	1	IPI00449049.5		0	0.000208	0.00017072	1.83822	0	2	1066.59	-0.268626	27.7511	0
	Low	TQTPNRK	1	2	1	IPI00449049.5		0	0.061791	0.65777	1.3624	0	2	844.463	-1.11106	15.1276	1
	High	GQDGIGSK	1	2	1	IPI00449049.5		0	0.006164	0.0794189	1.66982	0	2	761.377	-2.19007	18.3439	0
	High	GQVKEEGINK	1	2	1	IPI00449049.5		0	0	0.00017072	1.84511	0	2	1101.59	-1.02451	20.5405	1
	Medium	LKTDIK	1	4	1	IPI00449049.5		0	0.028879	0.338946	1.55792	0	2	717.451	0.420883	22.4806	1
	High	VGTVIGSNK	1	2	1	IPI00449049.5		0	0	0.000126601	2.20437	0	2	874.499	-0.821665	22.9201	0
	High	KGDEVDGVDEVAK	1	3	1	IPI00449049.5		0	0	4.97169e-16	3.48559	0	2	1360.66	-1.82815	24.9566	1
	Medium	EISYLKK	1	2	1	IPI00449049.5		0	0.015912	0.160217	1.17269	0	2	880.513	-0.865606	26.3939	1
	High	VVDRDSEEAEIIRK	1	1	1	IPI00449049.5		0	0	4.51894e-06	2.76619	0	3	1658.87	-0.550414	27.0077	2
	High	GGSDDSSKDPIDVNYEK	1	2	1	IPI00449049.5		0	0.000208	0.00017072	1.66366	0	3	1825.81	-1.62232	27.2064	1
	High	KPPLLNNADSVQAK	2	2	1	IPI00449049.5		0	0	0.00017072	2.06159	0	3	1494.82	-1.85279	27.3533	0
	Low	DSEEAEIIR	1	2	1	IPI00449049.5		0.1667			0.749021	0	2	1061.5	-9.62908	27.4786	0
	Low	EWVTPK	1	2	1	IPI00449049.5		0	0.091119	1	1.0611	0	2	759.402	-1.83441	27.5786	0
	High	VVDRDSEEAEIIR	2	2	1	IPI00449049.5		0	0	0.00017072	1.63697	0	2	1530.77	-2.78112	28.4666	1
	Low	EISYLK	1	2	1	IPI00449049.5		0	0.069874	0.839206	1.22145	0	2	752.417	-2.96076	28.5203	0
	High	GGAAVDPDSGLEHSAHVLEK	1	2	1	IPI00449049.5		0	0	2.13185e-05	2.38028	0	3	1988.97	-1.07001	29.6694	0
	High	LQLLEDDKENR	2	2	1	IPI00449049.5		0	0	6.20935e-14	2.49143	0	3	1372.71	-0.171351	29.742	1
	High	NREELGFRPEYSASQLK	1	3	1	IPI00449049.5		0	0	1.76232e-14	3.49608	0	3	2024.02	1.2493	31.7702	1
	High	TLGDFAAEYAK	1	3	1	IPI00449049.5		0	0	8.93115e-12	1.89431	0	2	1185.58	0.497589	33.1272	0
	Medium	SKLPKPVQDLIK	1	2	1	IPI00449049.5		0	0.022095	0.182958	1.38037	0	3	1365.85	-0.209584	33.2719	1
	High	GFSLLATEDKEALKK	1	3	1	IPI00449049.5		0	0	3.52316e-10	2.57534	0	3	1649.91	1.35148	33.5932	2
	High	VVSEDFLQDVSASTK	1	2	1	IPI00449049.5		0	0	3.85401e-16	3.12243	0	2	1624.81	0.0214508	35.5306	0
	Medium	ELLIFNK	1	2	1	IPI00449049.5		0	0.029694	0.35049	1.23706	0	2	876.52	0.971672	35.9119	0
	High	TTNFAGILSQGLR	1	2	1	IPI00449049.5		0	0	6.99634e-13	3.60887	0	2	1377.75	1.52905	38.7645	0
	High	VFSATLGLVDIVK	1	2	1	IPI00449049.5		0	0	1.2531e-12	2.65659	0	2	1361.8	-1.93433	41.0179	0
	High	SLQELFLAHILSPWGAEVK	1	2	1	IPI00449049.5		0	0	3.85401e-16	2.84951	0	3	2138.17	1.5001	47.1974	0
IPI00789551.1	Uncharacterized protein	57.659	43.02	20	25	37	47	895	99.9054	6.03662
	A2	Sequence	# PSMs	# Proteins	# Protein Groups	Protein Group Accessions	Modifications	ΔCn	q-Value	PEP	XCorr	Probability	Charge	MH+ [Da]	ΔM [ppm]	RT [min]	# Missed Cleavages
	Low	cVKVDLSEK	1	6	1	IPI00789551.1	N-Term(Gln->pyro-Glu); C1(Carbamidomethyl)	0			0.601321	0	2	1060.53	-7.27693	24.5274	1
	Low	sFQQSSLSR	1	11	1	IPI00789551.1	N-Term(Gln->pyro-Glu)	0.0135			0.731557	0	2	1022.49	2.90303	24.6739	0
	High	SQAFIEmETR	1	6	1	IPI00789551.1	M7(Oxidation)	0	0.000208	0.00017072	1.72206	0	2	1227.57	-0.832909	27.4061	0
	Low	IKNYILmR	1	6	1	IPI00789551.1	M7(Oxidation)	0	0.116667	1	0.961024	0	2	1066.61	0.714233	29.6868	1
	Low	NYILmR	1	6	1	IPI00789551.1	M5(Oxidation)	0	0.075361	0.922153	1.1754	0	2	825.429	-0.157293	28.3712	0
	High	VVHImDFQR	2	12	1	IPI00789551.1	M5(Oxidation)	0	0.004205	0.0491719	1.4998	0	2	1160.59	-1.6518	29.1179	0
	High	DLSAAGIGLLAAATQSLSmPASLGR	1	10	1	IPI00789551.1	M19(Oxidation)	0	0	3.85401e-16	3.6721	0	3	2387.26	-0.813437	45.249	0
	Low	mDYEDDRLR	1	4	1	IPI00789551.1	M1(Oxidation)	0	0.260156	1	0.581671	0	2	1228.52	-3.81129	25.1422	1
	Low	NTHcSSLPHYQK	1	5	1	IPI00789551.1	C4(Carbamidomethyl)	0	0.164944	1	0.710058	0	3	1471.67	0.159745	24.2139	0
	High	LcSLFYTNEEVAK	1	5	1	IPI00789551.1	C2(Carbamidomethyl)	0	0	2.32876e-14	2.82901	0	2	1573.76	0.721076	34.7538	0
	Low	KPEGKPDQK	1	7	1	IPI00789551.1		0			0.716573	0	2	1026.55	-10.4472	27.2084	0
	High	TESSTEGKEQEEK	2	5	1	IPI00789551.1		0	0	1.43055e-11	2.38594	0	2	1481.66	-1.515	16.5318	1
	Low	GRVETSR	1	12	1	IPI00789551.1		0	0.057169	0.600068	1.62193	0	2	804.432	-0.206146	17.1277	1
	Low	LAEERR	1	5	1	IPI00789551.1		0	0.320912	1	0.882751	0	2	773.425	-1.93547	18.4561	1
	High	IKKPEGKPDQK	2	7	1	IPI00789551.1		0	0.000397	0.00285003	1.46081	0	2	1267.74	-0.534533	18.8655	1
	Medium	VHLSQK	1	7	1	IPI00789551.1		0	0.028879	0.340862	1.78084	0	2	711.414	-1.25708	20.0187	0
	Low	DSFDDR	1	4	1	IPI00789551.1		0	0.062408	0.660233	1.11965	0	2	754.3	-0.137661	21.9459	0
	Low	SATREPPYR	1	4	1	IPI00789551.1		0	0.177575	1	1.35326	0	2	1076.55	0.468556	22.4453	1
	High	SQESGYYDR	1	4	1	IPI00789551.1		0	0.000208	0.00017072	1.63306	0	2	1104.46	1.33971	22.6393	0
	High	FDQKQELGR	1	7	1	IPI00789551.1		0	0.000208	0.00017072	2.07324	0	2	1120.57	-1.38827	23.7892	1
	High	GPGPLQER	2	5	1	IPI00789551.1		0	0.001552	0.0160304	2.20578	0	2	853.452	-0.937885	24.4376	0
	High	FDSEYER	1	5	1	IPI00789551.1		0	0.000397	0.00470923	1.47314	0	2	945.394	-0.836405	24.3733	0
	High	GNLGAGNGNLQGPR	1	12	1	IPI00789551.1		0	0	8.4313e-16	3.35122	0	2	1324.67	-0.48555	24.7688	0
	High	GPLPLSSQHR	4	5	1	IPI00789551.1		0	0	0.00017072	2.55388	0	2	1091.6	0.305575	26.9441	0
	High	RTEEGPTLSYGR	2	4	1	IPI00789551.1		0	0	5.7024e-08	2.51401	0	2	1365.68	0.0421394	26.8438	1
	Medium	DLDELSR	1	4	1	IPI00789551.1		0	0.010314	0.0919447	1.284	0	2	847.415	-0.858781	26.9021	0
	High	TEEGPTLSYGR	1	4	1	IPI00789551.1		0	0	1.44842e-07	2.72477	0	2	1209.57	-0.318254	27.1365	0
	High	GIDLLKK	2	5	1	IPI00789551.1		0	0.008473	0.0905476	1.41273	0	2	786.509	1.23924	29.9896	1
	Low	KSGMAFKSGDK	1	2	1	IPI00789551.1		0.6923			0.637121	0	2	1155.6	18.1239	32.3926	2
	High	VIHLSNLPHSGYSDSAVLK	1	7	1	IPI00789551.1		0	0	3.85401e-16	5.16986	0	3	2037.08	0.308884	33.2622	0
	Medium	DSFDDRGPSLNPVLDYDHGSR	1	4	1	IPI00789551.1		0	0.013138	0.108469	1.45978	0	3	2362.06	-1.95878	33.8696	1
	High	GAPPSSNIEDFHGLLPK	1	5	1	IPI00789551.1		0	0	1.74635e-15	2.16695	0	3	1778.91	-0.892402	35.2934	0
	Medium	ALWFQGR	1	6	1	IPI00789551.1		0	0.011306	0.092166	1.2471	0	2	877.468	-0.276174	35.7468	0
	High	IGPYQPNVPVGIDYVIPK	1	5	1	IPI00789551.1		0	0.000208	0.000295082	1.94376	0	2	1969.08	-1.42992	38.9273	0
	High	GDADQASNILASFGLSAR	2	4	1	IPI00789551.1		0	0	3.85401e-16	4.16685	0	2	1792.88	-0.486315	40.8563	0
	High	ITPENLPQILLQLK	1	4	1	IPI00789551.1		0	0	1.70311e-10	1.78262	0	2	1619.97	-1.32498	44.2892	0
	High	YQLLQLVEPFGVISNHLILNK	1	11	1	IPI00789551.1		0	0	3.85401e-16	4.31507	0	3	2438.38	-2.01017	46.5347	0
IPI00015953.3	Isoform 1 of Nucleolar RNA helicase 2	57.4207	48.66	5	27	38	43	783	87.2904	9.27588
	A2	Sequence	# PSMs	# Proteins	# Protein Groups	Protein Group Accessions	Modifications	ΔCn	q-Value	PEP	XCorr	Probability	Charge	MH+ [Da]	ΔM [ppm]	RT [min]	# Missed Cleavages
	Low	QrEITLK	1	2	1	IPI00015953.3	R2(Dimethyl)	0.4254			0.769464	0	2	915.551	-12.1209	32.0128	1
	Low	gQrEGSRGFr	1	1	1	IPI00015953.3	N-Term(Gln->pyro-Glu); R3(Methyl); R10(Methyl)	0.56			0.661678	0	2	1160.59	-4.96565	29.1179	2
	Low	vKGmVFLK	1	2	1	IPI00015953.3	N-Term(Gln->pyro-Glu); M4(Oxidation)	0.6129			0.964731	0	2	920.521	-6.8902	31.8591	1
	Low	kQTEEKEK	1	2	1	IPI00015953.3	N-Term(Gln->pyro-Glu)	0.4869			0.9764	0	2	1002.49	-15.3644	21.0784	2
	Low	gQREGSRGPR	1	2	1	IPI00015953.3	N-Term(Gln->pyro-Glu)	0			0.622508	0	2	1082.56	15.2682	21.106	2
	High	qDAQSLHGDIPQK	1	2	1	IPI00015953.3	N-Term(Gln->pyro-Glu)	0	0	2.44751e-11	3.0649	0	2	1419.69	-0.0108505	26.0126	0
	High	SDAGLESDTAmK	1	2	1	IPI00015953.3	M11(Oxidation)	0	0	2.09364e-13	2.85569	0	2	1240.54	0.242091	21.7384	0
	High	HVVLDEVDQmLDmGFADQVEEILSVAYK	1	2	1	IPI00015953.3	M10(Oxidation); M13(Oxidation)	0	0	3.85401e-16	4.99024	0	3	3225.53	-0.112003	47.4944	0
	High	KKAEPSEVDmNSPK	1	2	1	IPI00015953.3	M10(Oxidation)	0	0	3.10475e-07	2.23583	0	3	1575.77	-0.994741	20.3033	2
	High	TIIFcETKK	1	2	1	IPI00015953.3	C5(Carbamidomethyl)	0	0.000746	0.00679606	1.70039	0	2	1139.61	0.434901	29.4846	1
	Low	KAEPSEVDMNSPKSK	1	2	1	IPI00015953.3		0.5833			0.75406	0	3	1646.81	2.00977	24.0323	2
	High	VYSGHQGR	2	2	1	IPI00015953.3		0	0.000208	0.00017072	1.25631	0	2	903.443	-0.673887	17.6968	0
	Medium	KKEPIEK	1	2	1	IPI00015953.3		0	0.033696	0.409904	1.42419	0	2	871.525	0.532191	18.6505	2
	Low	KEPIEKK	1	2	1	IPI00015953.3		0.162			1.18827	0	2	871.525	0.532191	18.6505	2
	Low	KGETLR	1	2	1	IPI00015953.3		0	0.100569	1	1.34881	0	2	703.41	0.209512	19.8206	1
	High	IKDHIQNGK	1	2	1	IPI00015953.3		0	0.000208	0.000223747	1.29809	0	2	1052.58	-0.808863	20.1038	1
	High	KKEEPSQNDISPK	1	2	1	IPI00015953.3		0	0.000208	0.00025536	1.65582	0	3	1499.77	2.50475	21.336	2
	High	LHGELQDR	1	2	1	IPI00015953.3		0	0.00107	0.0115707	1.95215	0	2	967.495	-1.09237	23.0361	0
	High	TFHHVYSGK	1	2	1	IPI00015953.3		0	0.000208	0.000751857	1.13467	0	2	1075.53	2.66503	23.9752	0
	High	EAQELSQNSAIK	1	2	1	IPI00015953.3		0	0	4.15686e-10	2.6343	0	2	1317.66	-1.62423	24.2887	0
	High	NEEPSEEEIDAPKPK	1	2	1	IPI00015953.3		0	0	1.17979e-07	2.24217	0	3	1711.8	-0.161973	24.8508	0
	High	DFSDITKK	1	2	1	IPI00015953.3		0	0.001879	0.0175359	1.35671	0	2	953.493	-0.766313	25.5089	1
	Medium	DLIAQAR	2	6	2	IPI00015953.3;IPI00031554.1		0	0.012071	0.0945799	1.22926	0	2	786.449	2.89018	26.6329	0
	Medium	DFSDITK	1	2	1	IPI00015953.3		0	0.011306	0.0922011	1.13426	0	2	825.399	-0.0726804	26.6166	0
	High	EGYGGFR	1	2	1	IPI00015953.3		0	0.000746	0.00663428	1.50741	0	2	785.356	-2.0954	27.1553	0
	High	DVESYIHR	1	2	1	IPI00015953.3		0	0.000208	0.000516176	1.84862	0	2	1018.5	0.80414	27.781	0
	High	ELKEQLGEEIDSK	1	2	1	IPI00015953.3		0	0	2.28094e-10	2.28171	0	2	1517.77	-0.620045	28.861	1
	High	AAVIGDVIR	2	2	1	IPI00015953.3		0	0.000208	0.000463608	2.25648	0	2	913.548	1.82155	31.8297	0
	High	TAITVEHLAIK	1	2	1	IPI00015953.3		0	0.000746	0.00663051	1.36533	0	3	1195.7	-1.26638	31.7972	0
	High	GRAPQVLVLAPTR	2	2	1	IPI00015953.3		0	0	3.85401e-16	3.02597	0	2	1377.83	0.70574	32.3361	1
	High	APQVLVLAPTR	1	2	1	IPI00015953.3		0	0	4.04601e-08	3.18405	0	2	1164.71	0.547422	32.9012	0
	High	IGVPSATEIIK	1	2	1	IPI00015953.3		0	0	3.70444e-06	2.14254	0	2	1127.67	0.694334	33.1017	0
	High	LLDSVPPTAISHFK	1	2	1	IPI00015953.3		0	0	1.356e-08	2.27206	0	3	1524.84	1.41072	34.1019	0
	High	NGIDILVGTPGR	1	4	2	IPI00015953.3;IPI00031554.1		0	0.000208	0.00017072	2.79756	0	2	1211.68	1.73966	34.7443	0
	High	EGAFSNFPISEETIK	1	4	2	IPI00015953.3;IPI00031554.1		0	0	4.89964e-11	2.65476	0	2	1668.81	-0.0301195	36.2746	0
	High	GVTFLFPIQAK	1	2	1	IPI00015953.3		0	0	2.25162e-05	2.17588	0	2	1220.7	-1.33961	40.3466	0
	High	TFSFAIPLIEK	2	2	1	IPI00015953.3		0	0	2.32318e-07	2.34728	0	2	1265.71	-0.019312	42.0533	0
	High	GAVEALAAALAHISGATSVDQR	1	2	1	IPI00015953.3		0	0	4.80903e-16	3.3906	0	2	2108.1	-2.27094	45.4881	0
IPI00555747.1	Isoform 2 of Polyadenylate-binding protein 4	55.3949	47.39	13	14	31	44	631	69.5348	9.5249
	A2	Sequence	# PSMs	# Proteins	# Protein Groups	Protein Group Accessions	Modifications	ΔCn	q-Value	PEP	XCorr	Probability	Charge	MH+ [Da]	ΔM [ppm]	RT [min]	# Missed Cleavages
	Low	FEQLKQEr	1	6	1	IPI00555747.1	R8(Trimethyl)	0.6346			0.757507	0	2	1119.62	-0.401322	26.8643	1
	Low	KVFVGr	1	11	2	IPI00008524.1;IPI00555747.1	R6(Dimethyl)	0.2128			0.738339	0	2	733.473	1.51166	29.9701	1
	Low	VErQAELK	1	7	2	IPI00555747.1;IPI00008524.1	R3(Trimethyl)	0.5302			1.00972	0	2	1014.59	-7.68581	30.0723	1
	Low	FSPAGPVLSIr	3	5	1	IPI00555747.1	R11(Methyl)	0.2939			1.73094	0	2	1157.67	-0.00785361	36.7135	0
	Low	KAHLTNQYMQr	1	6	1	IPI00555747.1	R11(Dimethyl)	0.7598			0.42509	0	3	1417.76	14.1352	33.5266	1
	Low	kAHLTNQYMQr	1	6	1	IPI00555747.1	N-Term(Gln->pyro-Glu); R11(Trimethyl)	0.7169			0.619588	0	3	1414.73	4.39667	33.8789	1
	Low	qmLGER	1	15	2	IPI00008524.1;IPI00555747.1	N-Term(Gln->pyro-Glu); M2(Oxidation)	0	0.085057	1	1.5003	0	2	732.335	1.21322	22.4814	0
	Low	qAELKR	1	6	1	IPI00555747.1	N-Term(Gln->pyro-Glu)	0	0.194776	1	1.41983	0	2	727.411	1.54374	22.0421	1
	Low	kVERQAELK	1	7	2	IPI00555747.1;IPI00008524.1	N-Term(Gln->pyro-Glu)	0.4932			0.749013	0	2	1083.62	4.75711	35.3384	2
	High	KAHLTNQYmQR	2	6	1	IPI00555747.1	M9(Oxidation)	0	0.003188	0.0361812	1.56667	0	3	1405.7	0.997473	22.6119	1
	High	LFPLIQTmHSNLAGK	1	6	1	IPI00555747.1	M8(Oxidation)	0	0	2.13233e-11	2.08173	0	3	1685.9	-1.20908	35.6744	0
	High	ALDTmNFDVIK	2	15	2	IPI00008524.1;IPI00555747.1	M5(Oxidation)	0	0	8.6669e-15	2.68277	0	2	1282.63	-1.06488	33.5429	0
	High	ITGmLLEIDNSELLHmLESPESLR	1	15	2	IPI00008524.1;IPI00555747.1	M4(Oxidation); M16(Oxidation)	0	0	3.85401e-16	3.43428	0	3	2772.38	-0.000196976	41.8097	0
	High	VmLEDGR	2	6	1	IPI00555747.1	M2(Oxidation)	0	0.000917	0.00850259	1.26531	0	2	835.397	-1.47505	23.093	0
	Medium	ImWSQR	1	19	2	IPI00008524.1;IPI00555747.1	M2(Oxidation)	0	0.033155	0.394566	0.952731	0	2	836.407	-1.24473	27.1216	0
	High	mNGmLLNDRK	2	12	2	IPI00008524.1;IPI00555747.1	M1(Oxidation); M4(Oxidation)	0	0.000208	0.00017072	1.98309	0	2	1223.59	-0.977619	23.8706	1
	High	GFGFVcFSSPEEATK	1	14	2	IPI00008524.1;IPI00555747.1	C6(Carbamidomethyl)	0	0	1.17572e-12	3.01421	0	2	1662.75	0.635757	37.7211	0
	High	VVcDENGSK	1	10	2	IPI00008524.1;IPI00555747.1	C3(Carbamidomethyl)	0	0	0.00017072	1.67213	0	2	1007.44	-1.46362	16.6821	0
	High	ALYDTFSAFGNILScK	1	12	2	IPI00008524.1;IPI00555747.1	C15(Carbamidomethyl)	0	0	1.3035e-06	1.87086	0	2	1806.87	-1.39038	42.4879	0
	Medium	DPSLRK	2	16	2	IPI00008524.1;IPI00555747.1		0.0072	0.045904	0.436118	1.36875	0	2	715.409	-0.732467	20.2603	1
	High	AKEFTNVYIK	2	11	2	IPI00008524.1;IPI00555747.1		0	0.000208	0.00017072	1.51453	0	2	1212.66	0.149988	30.4501	1
	High	EFTNVYIK	2	11	2	IPI00008524.1;IPI00555747.1		0	0.003051	0.0324776	1.77679	0	2	1013.53	1.51409	31.4856	0
	High	EREAELGAK	1	5	1	IPI00555747.1		0	0.00757	0.087065	2.01616	0	2	1002.53	3.73439	21.4147	1
	Medium	GLPTTTQR	1	5	1	IPI00555747.1		0	0.030393	0.358143	1.44996	0	2	873.48	1.23155	22.5748	0
	High	KFEQLKQER	1	6	1	IPI00555747.1		0	0	0.00017072	2.78514	0	2	1205.66	-0.613633	24.3499	2
	Medium	KFEQLK	1	7	1	IPI00555747.1		0	0.04009	0.436118	1.16927	0	2	792.461	-0.280216	24.9502	1
	High	NLDDTIDDEKLRK	1	6	1	IPI00555747.1		0	0	1.95129e-14	2.83828	0	3	1574.8	0.178446	28.0024	2
	High	SKVDEAVAVLQAHHAK	2	6	1	IPI00555747.1		0	0	4.2456e-13	2.12108	0	4	1702.92	-0.482172	30.8739	1
	High	SGVGNVFIK	1	7	1	IPI00555747.1		0	0	5.95042e-05	2.47665	0	2	920.521	1.15525	31.8591	0
	High	SLGYAYVNFQQPADAER	1	15	2	IPI00008524.1;IPI00555747.1		0	0	2.28408e-15	3.23799	0	2	1928.91	-0.968664	34.3422	0
	High	IVGSKPLYVALAQR	1	6	1	IPI00555747.1		0	0	1.67271e-14	2.47562	0	3	1514.91	1.69734	34.4358	0
	High	FSPAGPVLSIR	1	5	1	IPI00555747.1		0	0	5.36283e-05	2.21852	0	2	1143.65	0.227384	34.7308	0
	High	EFSPFGSITSAK	1	6	1	IPI00555747.1		0	0	8.15015e-07	2.20908	0	2	1270.63	-1.19696	35.7624	0
	High	NFGEEVDDESLKELFSQFGK	1	5	1	IPI00555747.1		0	0	3.85401e-16	3.47925	0	3	2318.07	-3.70378	43.0836	1
IPI00186290.6	Elongation factor 2	54.7447	33.33	6	24	36	46	858	95.277	6.82959
	A2	Sequence	# PSMs	# Proteins	# Protein Groups	Protein Group Accessions	Modifications	ΔCn	q-Value	PEP	XCorr	Probability	Charge	MH+ [Da]	ΔM [ppm]	RT [min]	# Missed Cleavages
	Low	KSDPVVSYr	1	2	1	IPI00186290.6	R9(Methyl)	0.7415			0.52695	0	2	1064.56	-15.1243	21.5396	1
	Low	AIMDKKANIr	1	5	1	IPI00186290.6	R10(Methyl)	0.6748			0.802329	0	2	1173.68	-1.88713	39.0337	2
	Low	kDEQEr	1	5	1	IPI00186290.6	N-Term(Gln->pyro-Glu); R6(Dimethyl)	0.5896			0.55464	0	2	815.405	18.6869	22.1186	1
	Low	grFYAFGr	2	3	1	IPI00186290.6	N-Term(Gln->pyro-Glu); R2(Methyl); R8(Trimethyl)	0			0.711847	0	2	1012.52	-14.3959	28.9925	1
	Low	vrImGPNYTPGK	1	2	1	IPI00186290.6	N-Term(Gln->pyro-Glu); R2(Methyl); M4(Oxidation)	0.655			0.891315	0	3	1345.7	1.75787	20.4124	1
	High	IKPVLmmNK	2	5	1	IPI00186290.6	M6(Oxidation); M7(Oxidation)	0	0.003051	0.0318949	1.0689	0	2	1105.61	-0.206219	24.5566	0
	Medium	VFDAImNFKK	1	4	1	IPI00186290.6	M6(Oxidation)	0	0.013886	0.118702	1.03139	0	3	1228.64	1.24494	31.7587	1
	High	VFDAImNFK	1	4	1	IPI00186290.6	M6(Oxidation)	0	0.000208	0.00017072	1.39189	0	2	1100.54	0.375427	33.9112	0
	Low	KVEDmmK	1	5	1	IPI00186290.6	M5(Oxidation); M6(Oxidation)	0			0.482775	0	2	912.418	1.10454	15.7136	1
	Low	VEDmmKK	1	5	1	IPI00186290.6	M4(Oxidation); M5(Oxidation)	0	0.244424	1	0.496217	0	2	912.416	-0.300231	14.8748	1
	Low	AImDKK	1	5	1	IPI00186290.6	M3(Oxidation)	0	0.125126	1	1.17358	0	2	721.393	1.87202	16.1297	1
	High	ImGPNYTPGK	1	2	1	IPI00186290.6	M2(Oxidation)	0	0.005474	0.0664612	1.15926	0	2	1093.54	1.01314	24.4534	0
	High	NmSVIAHVDHGK	2	5	1	IPI00186290.6	M2(Oxidation)	0	0	3.67067e-11	2.5621	0	2	1323.65	0.316132	24.6399	0
	High	GHVFEESQVAGTPmFVVK	1	2	1	IPI00186290.6	M14(Oxidation)	0	0	0.00013281	2.71789	0	3	1977.98	1.35562	33.4059	0
	High	TGTITTFEHAHNmR	1	2	1	IPI00186290.6	M13(Oxidation)	0	0	3.85401e-16	3.2313	0	3	1631.76	-0.430876	27.2687	0
	Medium	mVPTSDK	1	3	1	IPI00186290.6	M1(Oxidation)	0	0.032953	0.392433	0.951548	0	2	793.377	1.01131	17.6379	0
	High	mVPTSDKGR	1	3	1	IPI00186290.6	M1(Oxidation)	0	0.003051	0.031975	1.53749	0	2	1006.5	-1.05326	17.9111	1
	High	STLTDSLVcK	1	5	1	IPI00186290.6	C9(Carbamidomethyl)	0	0	0.00017072	2.54473	0	2	1123.57	-1.03435	29.5744	0
	High	EGALcEENmR	1	2	1	IPI00186290.6	C5(Carbamidomethyl); M9(Oxidation)	0	0.000208	0.00017072	2.00296	0	2	1224.5	1.8274	22.007	0
	High	TFcQLILDPIFK	1	4	1	IPI00186290.6	C3(Carbamidomethyl)	0	0	2.3576e-10	2.43898	0	2	1494.8	-2.71327	43.9213	0
	High	ETVSEESNVLcLSK	1	3	1	IPI00186290.6	C11(Carbamidomethyl)	0	0	9.57235e-10	1.61147	0	2	1594.76	-0.126908	31.4469	0
	Low	LDSEDKDK	1	4	1	IPI00186290.6		0.5			0.483202	0	2	949.447	-0.147609	15.8606	1
	High	GEGQLGPAER	1	5	1	IPI00186290.6		0	0	0.00017072	2.81994	0	2	1013.5	-0.748422	22.9199	0
	Medium	NPADLPK	1	2	1	IPI00186290.6		0	0.012743	0.107105	1.09179	0	2	754.409	-0.176269	23.2684	0
	High	LDSEDKDKEGKPLLK	1	4	1	IPI00186290.6		0	0	1.68208e-08	2.62172	0	3	1714.92	-1.72991	25.1951	2
	High	AGIIASAR	2	5	1	IPI00186290.6		0	0.000746	0.00784412	1.59128	0	2	758.451	-1.13903	25.6115	0
	High	YFDPANGK	1	4	1	IPI00186290.6		0	0.000208	0.00017072	1.60539	0	2	911.425	-0.427569	25.97	0
	High	GGGQIIPTAR	3	5	2	IPI00917777.1;IPI00186290.6		0	0.000397	0.00385362	2.38176	0	2	969.548	0.245332	26.7486	0
	Low	KLWGDR	1	4	1	IPI00186290.6		0	0.159471	1	1.25226	0	2	774.426	-0.044577	27.6516	1
	High	KEDLYLKPIQR	2	3	1	IPI00186290.6		0	0	3.67774e-06	2.5116	0	3	1402.81	1.74087	29.8232	1
	High	EDLYLKPIQR	1	3	1	IPI00186290.6		0	0.000208	0.00017072	2.25406	0	2	1274.71	0.106312	30.9208	0
	Medium	FYAFGR	2	3	1	IPI00186290.6		0	0.011306	0.0921604	1.22822	0	2	760.378	0.590616	32.2913	0
	High	VFSGLVSTGLK	2	3	1	IPI00186290.6		0	0	7.38487e-10	2.36058	0	2	1107.64	0.684212	34.1644	0
	High	EGIPALDNFLDKL	1	2	1	IPI00186290.6		0	0.000208	0.00017072	2.26875	0	2	1444.77	-2.24192	45.999	1
	High	STAISLFYELSENDLNFIK	2	5	1	IPI00186290.6		0	0	3.85401e-16	4.11492	0	3	2204.11	-2.38353	47.2597	0
	Low	KLWGDRYFDPANGK	1	4	1	IPI00186290.6		0.4069			0.857196	0	3	1666.83	-4.89353	19.1405	2
IPI00012772.8	60S ribosomal protein L8	54.5602	60.7	7	16	22	39	257	28.0073	11.0337
	A2	Sequence	# PSMs	# Proteins	# Protein Groups	Protein Group Accessions	Modifications	ΔCn	q-Value	PEP	XCorr	Probability	Charge	MH+ [Da]	ΔM [ppm]	RT [min]	# Missed Cleavages
	Low	TGrLRGTK	3	5	1	IPI00012772.8	R3(Dimethyl)	0			0.407355	0	2	916.569	0.655925	34.1517	2
	Low	kVISSANr	1	5	1	IPI00012772.8	N-Term(Gln->pyro-Glu); R8(Trimethyl)	0	0.691283	1	0.641434	0	2	899.542	12.4158	34.1421	1
	Low	gQrKGAGSVFR	1	7	1	IPI00012772.8	N-Term(Gln->pyro-Glu); R3(Methyl)	0			0.784159	0	2	1159.65	13.7655	35.8537	2
	Low	kGAARLR	1	7	1	IPI00012772.8	N-Term(Gln->pyro-Glu)	0.0746			0.623454	0	2	754.469	1.08749	15.9785	2
	High	GVAmNPVEHPFGGGNHQHIGKPSTIR	2	4	1	IPI00012772.8	M4(Oxidation)	0	0	3.85401e-16	3.51836	0	4	2753.37	-0.697388	29.0274	0
	Low	NcWPR	1	5	1	IPI00012772.8	C2(Carbamidomethyl)	0	0.10672	1	0.952141	0	2	732.324	-1.00388	26.0575	0
	Low	DAPAGRK	1	5	1	IPI00012772.8		0	0.214232	1	0.898268	0	2	714.388	-2.00911	14.4648	1
	Low	TVQEKEN	2	4	1	IPI00012772.8		0	0.082657	1	0.965312	0	2	847.414	-1.92736	14.9335	1
	Medium	VISSANR	2	5	1	IPI00012772.8		0	0.020244	0.171734	1.21879	0	2	746.416	-0.0634937	18.3609	0
	High	KVISSANR	2	5	1	IPI00012772.8		0	0.005213	0.0577428	1.99105	0	2	874.51	-0.681531	19.4781	1
	High	VKLPSGSKK	1	4	1	IPI00012772.8		0	0.002485	0.0244411	1.60112	0	2	943.593	-0.439901	22.142	2
	High	VKLPSGSK	1	4	1	IPI00012772.8		0	0.000208	0.00248774	1.68549	0	2	815.499	0.163735	23.0654	1
	High	KGAGSVFR	2	7	1	IPI00012772.8		0	0.000208	0.000370481	2.13353	0	2	821.462	-1.31807	25.4509	1
	Medium	DIIHDPGR	1	5	1	IPI00012772.8		0	0.033696	0.409877	1.68699	0	2	922.473	-0.973616	24.7693	0
	High	AVVGVVAGGGR	2	5	1	IPI00012772.8		0	0	0.00017072	3.02927	0	2	941.553	0.086781	26.1072	0
	High	IDKPILK	3	5	1	IPI00012772.8		0	0.005474	0.0686846	2.54235	0	2	826.54	0.8972	26.2112	0
	High	AVDFAER	2	7	1	IPI00012772.8		0	0.000397	0.00275576	2.13884	0	2	807.4	0.3686	26.434	0
	High	ASGNYATVISHNPETKK	1	5	1	IPI00012772.8		0	0	3.85401e-16	2.83203	0	3	1816.92	0.333777	26.5035	1
	High	ASGNYATVISHNPETK	2	5	1	IPI00012772.8		0	0	3.85401e-16	3.29166	0	2	1688.82	-1.65724	27.1527	0
	High	KVGLIAAR	1	5	1	IPI00012772.8		0	0.000397	0.0038704	2.813	0	2	827.545	-1.78355	27.447	1
	High	VGLIAAR	2	5	1	IPI00012772.8		0	0.007698	0.0879184	2.12424	0	2	699.45	-1.50036	28.2235	0
	Medium	VVFRDPYR	3	5	1	IPI00012772.8		0	0.015912	0.165973	1.50002	0	3	1051.57	0.0696697	30.5089	1
	High	GIVKDIIHDPGR	2	5	1	IPI00012772.8		0	0	1.8908e-13	2.91565	0	2	1319.75	2.13367	31.4498	1
IPI00218342.10	C-1-tetrahydrofolate synthase, cytoplasmic	52.9894	30.7	2	27	28	37	935	101.495	7.29834
	A2	Sequence	# PSMs	# Proteins	# Protein Groups	Protein Group Accessions	Modifications	ΔCn	q-Value	PEP	XCorr	Probability	Charge	MH+ [Da]	ΔM [ppm]	RT [min]	# Missed Cleavages
	High	qPSQGPTFGIK	1	2	1	IPI00218342.10	N-Term(Gln->pyro-Glu)	0	0.000208	0.000202501	1.88979	0	2	1142.59	2.82304	31.3044	0
	High	TAHLDEEVNKGDILVVATGQPEmVK	1	1	1	IPI00218342.10	M23(Oxidation)	0	0	4.54033e-10	2.4487	0	3	2709.38	0.917235	33.5058	1
	High	mFGIPVVVAVNAFK	1	2	1	IPI00218342.10	M1(Oxidation)	0	0	0.000170581	2.3203	0	2	1507.83	-1.26228	42.8345	0
	High	ScKPKPIGK	1	2	1	IPI00218342.10	C2(Carbamidomethyl)	0	0.002783	0.0279858	1.21229	0	2	1014.58	0.670956	19.3841	0
	Medium	GcLELIK	1	2	1	IPI00218342.10	C2(Carbamidomethyl)	0	0.012071	0.094015	1.52135	0	2	832.461	1.63596	31.6472	0
	High	ITIGQAPTEK	3	2	1	IPI00218342.10		0	0.000746	0.00678165	1.69581	0	2	1057.59	2.48391	26.2197	0
	Medium	EISAQIR	2	2	1	IPI00218342.10		0	0.020607	0.172219	1.53575	0	2	816.457	-0.880221	25.2241	0
	High	VLLSALER	4	2	1	IPI00218342.10		0	0.000397	0.00402465	1.87451	0	2	900.551	-0.501267	33.9296	0
	Medium	VLDTNDR	1	2	1	IPI00218342.10		0	0.015074	0.153816	1.42895	0	2	832.416	-0.537463	20.8746	0
	Low	GFSNLKK	1	2	1	IPI00218342.10		0	0.070985	0.851318	0.95301	0	2	793.457	0.552751	24.1626	1
	Medium	ETGVPIAGR	1	2	1	IPI00218342.10		0	0.014447	0.145736	1.5058	0	2	899.494	-0.550472	24.9017	0
	High	THLSLSHNPEQK	2	2	1	IPI00218342.10		0	0	2.98122e-14	3.1241	0	2	1390.71	0.0386564	25.2141	0
	Medium	EHGAFDAVK	1	2	1	IPI00218342.10		0	0.010686	0.0919447	1.33145	0	2	973.474	0.168764	25.7191	0
	High	KVVGDVAYDEAK	1	2	1	IPI00218342.10		0	0	2.38439e-05	2.16827	0	2	1293.67	-0.0515356	25.8184	1
	High	VVGDVAYDEAK	1	2	1	IPI00218342.10		0	0	1.01582e-05	1.99931	0	2	1165.57	0.570576	26.1169	0
	High	AAEEIGIK	1	2	1	IPI00218342.10		0	0.000208	0.00017072	1.82308	0	2	830.461	-0.467114	26.1404	0
	High	LPVEDKIR	1	2	1	IPI00218342.10		0	0.000208	0.000950157	2.02342	0	2	969.573	0.0528482	27.0431	1
	High	IFHELTQTDK	1	2	1	IPI00218342.10		0	0	1.06524e-06	2.80668	0	2	1231.63	-0.503548	27.909	0
	High	TDPTTLTDEEINR	1	2	1	IPI00218342.10		0	0	2.01898e-13	3.10076	0	2	1504.71	-0.681758	27.9267	0
	High	EQVPGFTPR	1	2	1	IPI00218342.10		0	0.000208	0.000486292	1.92181	0	2	1030.53	-0.244176	28.7815	0
	High	TPVPSDIDISR	2	2	1	IPI00218342.10		0	0	2.01424e-07	2.37777	0	2	1199.63	1.06365	29.3308	0
	High	FSDIQIR	1	2	1	IPI00218342.10		0	0.001402	0.0130188	1.77391	0	2	878.475	2.21052	30.0723	0
	High	GALALAQAVQR	1	2	1	IPI00218342.10		0	0.000208	0.00017072	2.12018	0	2	1097.64	1.66309	31.8347	0
	High	TDTESELDLISR	1	2	1	IPI00218342.10		0	0	1.62252e-15	3.72642	0	2	1378.67	1.44136	32.8799	0
	High	LAILQVGNR	1	2	1	IPI00218342.10		0	0.000208	0.000924584	1.90002	0	2	983.601	0.83384	32.9816	0
	High	YVVVTGITPTPLGEGK	1	2	1	IPI00218342.10		0	0	3.85401e-16	3.13345	0	2	1630.91	0.272166	34.5428	0
	High	GVPTGFILPIR	2	2	1	IPI00218342.10		0	0.000208	0.00017072	2.30046	0	2	1169.7	-1.16689	40.0324	0
	High	AAQAPSSFQLLYDLK	1	2	1	IPI00218342.10		0	0	8.81495e-14	2.68686	0	2	1651.87	-1.25333	39.9853	0
IPI00293665.9	Keratin, type II cytoskeletal 6B	52.5434	21.45	22	1	16	51	564	60.0303	8.00146
	A2	Sequence	# PSMs	# Proteins	# Protein Groups	Protein Group Accessions	Modifications	ΔCn	q-Value	PEP	XCorr	Probability	Charge	MH+ [Da]	ΔM [ppm]	RT [min]	# Missed Cleavages
	Low	YEELQITAGr	1	2	2	IPI00220327.4;IPI00293665.9	R10(Methyl)	0.2684			1.39201	0	2	1193.62	-0.907719	30.3845	0
	Low	aEErEQIKTLNNK	1	9	2	IPI00021304.1;IPI00293665.9	N-Term(Gln->pyro-Glu); R4(Methyl)	0.7438			0.408939	0	3	1569.84	8.18582	39.5941	2
	Low	qEIAEINRmIQrLR	1	8	1	IPI00293665.9	N-Term(Gln->pyro-Glu); M9(Oxidation); R12(Methyl)	0			0.828067	0	2	1782.98	7.47826	47.3576	2
	Low	gEmALKDAK	1	8	1	IPI00293665.9	N-Term(Gln->pyro-Glu); M3(Oxidation)	0	0.439265	1	0.538938	0	2	961.456	-10.3979	32.1529	1
	Low	DVDAAYmNK	1	13	2	IPI00021304.1;IPI00293665.9	M7(Oxidation)	0	0.273546	1	0.846281	0	2	1042.45	2.1664	22.2905	0
	Low	KLLEGEEcR	1	14	2	IPI00021304.1;IPI00293665.9	C8(Carbamidomethyl)	0.2475			0.762161	0	3	1133.57	5.40203	16.1147	1
	Low	NKYEDEINK	3	13	3	IPI00293665.9;IPI00021304.1;IPI00220327.4		0			0.658677	0	2	1152.54	-9.13733	26.7903	1
	High	NKYEDEINKR	8	11	2	IPI00293665.9;IPI00220327.4		0	0	2.15508e-05	2.61261	0	2	1308.65	0.219549	23.9966	2
	Low	LDSELR	2	18	2	IPI00293665.9;IPI00021304.1		0.3353			1.15087	0	2	732.389	0.218796	21.7147	0
	High	AQYEEIAQR	4	12	2	IPI00021304.1;IPI00293665.9		0	0.000208	0.000173497	2.30476	0	2	1107.54	-2.0354	25.0563	0
	High	YEELQITAGR	6	2	2	IPI00220327.4;IPI00293665.9		0	0	3.65911e-07	2.57132	0	2	1179.6	0.0340505	30.1761	0
	High	FASFIDK	5	33	2	IPI00021304.1;IPI00293665.9		0	0.000208	0.000814338	1.66943	0	2	827.43	0.338409	31.9387	0
	High	YEDEINKR	3	18	3	IPI00021304.1;IPI00293665.9;IPI00220327.4		0	0.000208	0.000635427	1.55762	0	2	1066.52	1.26251	22.3711	1
	Medium	GRLDSELR	2	11	1	IPI00293665.9		0	0.0125	0.104116	1.56936	0	2	945.511	-0.251053	26.3353	1
	Low	YTTTSSSSR	5	8	1	IPI00293665.9		0.525			0.763064	0	2	989.437	-16.6802	31.4113	0
	High	FASFIDKVR	3	29	2	IPI00021304.1;IPI00293665.9		0	0	0.00017072	1.76631	0	3	1082.6	0.570775	33.3206	1
	High	NLDLDSIIAEVK	4	13	2	IPI00021304.1;IPI00293665.9		0	0	1.39787e-13	3.4049	0	2	1329.73	-0.619658	40.9837	0
IPI00441473.3	Protein arginine N-methyltransferase 5	52.2861	38.3	6	22	23	39	637	72.6376	6.29053
	A2	Sequence	# PSMs	# Proteins	# Protein Groups	Protein Group Accessions	Modifications	ΔCn	q-Value	PEP	XCorr	Probability	Charge	MH+ [Da]	ΔM [ppm]	RT [min]	# Missed Cleavages
	Low	TWMWWHNFrTLcDYSKr	1	4	1	IPI00441473.3	R9(Methyl); C12(Carbamidomethyl); R17(Dimethyl)	0			0.472268	0	3	2429.12	-10.3541	29.8326	2
	Low	VPLVAPEDLr	1	4	1	IPI00441473.3	R10(Trimethyl)	0			0.449106	0	2	1150.68	-4.94103	33.8572	0
	High	qGFDFLcmPVFHPR	1	4	1	IPI00441473.3	N-Term(Gln->pyro-Glu); C7(Carbamidomethyl); M8(Oxidation)	0	0	6.64422e-08	2.52502	0	2	1749.79	-1.48562	41.4417	0
	High	qGFDFLcMPVFHPR	1	4	1	IPI00441473.3	N-Term(Gln->pyro-Glu); C7(Carbamidomethyl)	0	0.000208	0.000195431	1.77713	0	2	1733.79	0.425847	45.5825	0
	High	cLLDRVPEEEKDTNVQVLmVLGAGR	1	5	1	IPI00441473.3	N-Term(Gln->pyro-Glu); C1(Carbamidomethyl); M19(Oxidation)	0	0.000208	0.00017072	1.51135	0	3	2840.42	-1.58818	40.9445	2
	Low	wLGEPIK	1	4	1	IPI00441473.3	N-Term(Gln->pyro-Glu)	0.2836			0.481341	0	2	825.44	-12.3656	17.7935	0
	Medium	DPmIDNNR	2	6	1	IPI00441473.3	M3(Oxidation)	0	0.034524	0.415885	1.04714	0	2	990.43	-0.513695	20.3942	0
	High	EKDRDPEAQFEmPYVVR	1	6	1	IPI00441473.3	M12(Oxidation)	0	0	1.48154e-14	3.34745	0	3	2125	0.574908	31.422	2
	High	EGQTIcVR	2	6	1	IPI00441473.3	C6(Carbamidomethyl)	0	0.001552	0.0153525	1.67352	0	2	962.472	-0.10147	24.3269	0
	High	DLNcVPEIADTLGAVAK	2	2	1	IPI00441473.3	C4(Carbamidomethyl)	0	0	1.18266e-07	1.92392	0	3	1785.9	-2.03866	38.7015	0
	High	TLcDYSKR	1	4	1	IPI00441473.3	C3(Carbamidomethyl)	0	0.006885	0.0826255	1.07973	0	2	1042.5	-0.284591	23.1022	1
	High	LHNFHQLSAPQPcFTFSHPNR	2	6	1	IPI00441473.3	C13(Carbamidomethyl)	0	0	3.85401e-16	4.21068	0	3	2535.2	-1.99872	33.8089	0
	High	NRPGPQTR	1	4	1	IPI00441473.3		0	0.006597	0.0817828	1.73521	0	2	925.495	-1.53614	18.4308	0
	Medium	LYNEVR	2	6	1	IPI00441473.3		0	0.010936	0.0919447	1.45805	0	2	793.42	0.120264	24.432	0
	High	EFIQEPAK	2	4	1	IPI00441473.3		0	0.001552	0.0156448	1.77458	0	2	961.499	0.230688	26.871	0
	High	YSQYQQAIYK	1	5	1	IPI00441473.3		0	0	1.17653e-11	2.9003	0	2	1291.63	-0.260171	27.7179	0
	High	GPLVNASLR	2	5	1	IPI00441473.3		0	0.000208	0.00124258	2.44997	0	2	926.541	-0.444519	29.328	0
	High	KGFPVLSK	2	4	1	IPI00441473.3		0	0.000208	0.000174283	2.6051	0	2	875.535	0.555876	30.2984	1
	High	SDLLLSGR	1	4	1	IPI00441473.3		0	0.000587	0.00540299	2.40841	0	2	860.484	0.470767	30.8985	0
	High	LSPWIRPDSK	1	3	1	IPI00441473.3		0	0.000208	0.00017072	1.94323	0	2	1198.66	0.563659	31.4343	0
	Medium	GFPVLSK	1	4	1	IPI00441473.3		0	0.02656	0.290647	1.25048	0	2	747.441	1.63011	31.4997	0
	High	WLGEPIK	2	4	1	IPI00441473.3		0	0.005213	0.0571668	1.37351	0	2	842.476	-1.53673	32.9188	0
	High	VPLVAPEDLR	2	4	1	IPI00441473.3		0	0	1.52506e-06	2.31133	0	2	1108.63	-1.09685	33.1722	0
	High	VPLVAPEDLRDDIIENAPTTHTEEYSGEEK	1	3	1	IPI00441473.3		0	0	3.85401e-16	2.99195	0	3	3367.61	-2.3503	36.4588	1
	High	AAILPTSIFLTNKK	3	4	1	IPI00441473.3		0	0	2.93455e-08	2.23664	0	3	1516.91	-1.23883	38.1147	1
	High	AAILPTSIFLTNK	2	4	1	IPI00441473.3		0	0	6.12662e-05	2.18261	0	2	1388.81	-0.0694374	40.1707	0
IPI00419880.6	40S ribosomal protein S3a	52.2566	68.18	12	20	23	40	264	29.9257	9.72998
	A2	Sequence	# PSMs	# Proteins	# Protein Groups	Protein Group Accessions	Modifications	ΔCn	q-Value	PEP	XCorr	Probability	Charge	MH+ [Da]	ΔM [ppm]	RT [min]	# Missed Cleavages
	Low	kKmMEImTR	1	8	1	IPI00419880.6	N-Term(Gln->pyro-Glu); M3(Oxidation); M7(Oxidation)	0			0.408953	0	2	1182.57	-1.23154	39.203	2
	Low	KMMEImTR	3	8	1	IPI00419880.6	M6(Oxidation)	0			0.501502	0	2	1055.51	3.22872	30.6993	1
	High	APAmFNIR	2	6	1	IPI00419880.6	M4(Oxidation)	0	0.000208	0.00017264	1.7202	0	2	935.476	-1.25366	29.3699	0
	Medium	KKmmEImTR	1	8	1	IPI00419880.6	M3(Oxidation); M4(Oxidation); M7(Oxidation)	0	0.012303	0.0979863	0.746819	0	3	1215.59	-0.464337	19.5371	2
	Low	DKmcSmVK	1	8	1	IPI00419880.6	M3(Oxidation); C4(Carbamidomethyl); M6(Oxidation)	0	0.080425	1	0.669999	0	2	1030.44	2.51474	16.1277	1
	Low	KmmEImTR	1	8	1	IPI00419880.6	M2(Oxidation); M3(Oxidation); M6(Oxidation)	0			0.501813	0	2	1087.49	0.250369	19.8603	1
	High	LmELHGEGSSSGK	2	5	1	IPI00419880.6	M2(Oxidation)	0	0	4.89163e-16	2.76203	0	2	1347.62	-0.239854	22.2831	0
	Medium	mmEImTR	1	8	1	IPI00419880.6	M1(Oxidation); M2(Oxidation); M5(Oxidation)	0	0.011966	0.0936176	1.1423	0	2	959.399	-0.22588	20.0533	0
	High	LFcVGFTK	2	9	1	IPI00419880.6	C3(Carbamidomethyl)	0	0.000208	0.000441509	1.556	0	2	971.503	1.12508	34.7768	0
	High	NcLTNFHGmDLTR	2	8	1	IPI00419880.6	C2(Carbamidomethyl); M9(Oxidation)	0	0	1.86018e-05	2.2481	0	3	1594.71	1.97571	29.7337	0
	High	AcQSIYPLHDVFVR	2	6	1	IPI00419880.6	C2(Carbamidomethyl)	0	0	8.1951e-12	3.09722	0	3	1704.85	-1.39624	36.588	0
	High	ATGDETGAK	2	4	1	IPI00419880.6		0	0	0.00017072	1.66501	0	2	849.393	-2.03234	14.5059	0
	High	KTSYAQHQQVR	2	9	1	IPI00419880.6		0	0	1.07131e-08	2.55844	0	2	1345.69	-1.96604	20.419	1
	High	TSYAQHQQVR	2	9	1	IPI00419880.6		0	0	4.24282e-05	2.49071	0	2	1217.6	-0.46912	20.5766	0
	High	EVQTNDLK	1	7	1	IPI00419880.6		0	0.002007	0.0197537	1.42421	0	2	946.484	-0.177518	21.9174	0
	High	IASDGLK	1	11	1	IPI00419880.6		0	0.003188	0.0361607	1.88728	0	2	703.398	-0.311782	22.2568	0
	High	LITEDVQGK	2	9	1	IPI00419880.6		0	0	1.68356e-05	2.08433	0	2	1002.55	-0.825233	25.0412	0
	Low	LIPDSIGK	1	6	1	IPI00419880.6		0.2121			0.782596	0	2	842.508	11.4169	27.4401	0
	High	EVQTNDLKEVVNK	2	7	1	IPI00419880.6		0	0	5.19047e-10	2.86458	0	3	1515.8	0.754113	27.5368	1
	High	ADGYEPPVQESV	1	4	1	IPI00419880.6		0	0.006164	0.0776016	1.57973	0	2	1290.58	-2.2738	28.7264	0
	High	VVDPFSKK	1	5	1	IPI00419880.6		0	0.000208	0.00026602	1.92482	0	2	919.523	-1.42052	29.01	1
	High	TTDGYLLR	2	10	1	IPI00419880.6		0	0	0.00017072	2.34646	0	2	938.494	-0.0789684	30.2227	0
	High	VVDPFSK	2	5	1	IPI00419880.6		0	0.00107	0.00912939	1.28012	0	2	791.43	0.739402	30.3318	0
	High	LIPDSIGKDIEK	2	6	1	IPI00419880.6		0	0	2.02052e-06	1.98433	0	3	1327.75	0.734378	31.1165	1
	High	VFEVSLADLQNDEVAFRK	1	10	1	IPI00419880.6		0	0	3.85401e-16	3.34939	0	3	2080.07	-2.59817	39.1614	1
IPI00889541.2	Isoform 4 of Probable ATP-dependent RNA helicase DDX17	51.3976	33.06	6	12	24	44	729	80.222	8.26514
	A2	Sequence	# PSMs	# Proteins	# Protein Groups	Protein Group Accessions	Modifications	ΔCn	q-Value	PEP	XCorr	Probability	Charge	MH+ [Da]	ΔM [ppm]	RT [min]	# Missed Cleavages
	Low	rcDDLTR	1	5	1	IPI00889541.2	R1(Methyl); C2(Carbamidomethyl)	0.3585			0.681168	0	2	949.452	0.362147	21.9637	1
	Low	eAATVASATGDSASEr	1	1	1	IPI00889541.2	N-Term(Gln->pyro-Glu); R16(Methyl)	0			0.619094	0	2	1519.69	2.02729	31.8281	0
	High	qLAEDFLR	2	5	1	IPI00889541.2	N-Term(Gln->pyro-Glu)	0	0.000587	0.005635	1.22061	0	2	974.494	-0.0976008	38.8105	0
	High	LIQLmEEImAEKENK	1	5	1	IPI00889541.2	M5(Oxidation); M9(Oxidation)	0	0	1.02692e-05	1.53474	0	3	1850.92	0.330842	32.0441	1
	High	DmVGIAQTGSGK	2	5	1	IPI00889541.2	M2(Oxidation)	0	0	1.42081e-10	2.69006	0	2	1179.57	1.09098	22.6441	0
	High	LmQLVDHR	2	4	1	IPI00889541.2	M2(Oxidation)	0	0.000746	0.00730613	1.93177	0	2	1027.53	-0.524228	24.9345	0
	High	GDGPIcLVLAPTR	1	9	2	IPI00798375.2;IPI00889541.2	C6(Carbamidomethyl)	0	0	1.16489e-06	2.52236	0	2	1368.73	0.38673	36.7169	0
	High	GVEIcIATPGR	2	9	2	IPI00798375.2;IPI00889541.2	C5(Carbamidomethyl)	0	0.000208	0.000237447	1.53462	0	2	1172.61	-0.923927	31.4151	0
	High	STcIYGGAPK	2	9	2	IPI00798375.2;IPI00889541.2	C3(Carbamidomethyl)	0	0.001879	0.0171675	0.99437	0	2	1053.5	-1.67137	25.0478	0
	Low	RcDDLTR	1	5	1	IPI00889541.2	C2(Carbamidomethyl)	0	0.250909	1	0.919177	0	2	935.436	-0.0624354	21.2259	1
	Low	KFGNPGER	1	5	1	IPI00889541.2		0	0.091581	1	1.28257	0	2	904.465	1.09996	22.4175	1
	Low	IVDQIRPDR	2	8	2	IPI00798375.2;IPI00889541.2		0	0.3757	1	1.19384	0	2	1111.62	-0.784459	25.2333	0
	Low	KIVDQIRPDR	3	8	2	IPI00798375.2;IPI00889541.2		0	0.073323	0.895454	1.42521	0	3	1239.72	-0.910616	25.7197	1
	High	VLEEANQAINPK	2	4	1	IPI00889541.2		0	0	2.39659e-09	2.34178	0	2	1325.71	0.981883	26.0671	0
	High	SSQSSSQQFSGIGR	2	5	1	IPI00889541.2		0	0	4.93222e-16	3.50668	0	2	1455.68	-1.43433	26.3743	0
	High	GLDVEDVK	3	6	2	IPI00798375.2;IPI00889541.2		0	0.000208	0.00111601	1.77195	0	2	874.452	0.367808	27.6491	0
	High	LTPYEVDELRR	2	5	1	IPI00889541.2		0	0.000208	0.00017072	1.75441	0	3	1390.74	1.81144	31.014	1
	High	TIIFVETK	2	5	1	IPI00889541.2		0	0.000208	0.00216063	1.77937	0	2	950.555	-0.362751	32.8245	0
	High	APILIATDVASR	3	9	2	IPI00798375.2;IPI00889541.2		0	0	6.48534e-10	3.4038	0	2	1226.71	-0.104852	33.1904	0
	High	LIDFLESGK	2	5	1	IPI00889541.2		0	0	3.04618e-07	1.77484	0	2	1021.56	0.79024	36.4336	0
	High	GTAYTFFTPGNLK	2	4	1	IPI00889541.2		0	0	1.36778e-09	1.90706	0	2	1416.72	0.449605	37.1901	0
	High	TLAYLLPAIVHINHQPYLER	2	5	1	IPI00889541.2		0	0	4.87582e-16	3.25927	0	3	2361.3	-2.50593	41.6938	0
	High	FGNPGER	1	5	1	IPI00889541.2		0	0.002638	0.0263063	1.78915	0	2	776.369	0.887457	21.8638	0
	Low	DSASYRDR	1	5	1	IPI00889541.2		0.5667			0.649518	0	2	969.427	-12.3589	24.5515	1
	Low	DRDRDR	1	11	4	IPI00006725.2;IPI00012998.2;IPI00396435.3;IPI00889541.2		0.5385			0.662267	0	2	832.416	16.1729	20.8746	2
IPI00420014.2	Isoform 1 of U5 small nuclear ribonucleoprotein 200 kDa helicase	47.7257	18.59	7	30	38	50	2136	244.353	6.06201
	A2	Sequence	# PSMs	# Proteins	# Protein Groups	Protein Group Accessions	Modifications	ΔCn	q-Value	PEP	XCorr	Probability	Charge	MH+ [Da]	ΔM [ppm]	RT [min]	# Missed Cleavages
	Low	SLIDrTr	1	2	1	IPI00420014.2	R5(Trimethyl); R7(Trimethyl)	0.3904			1.14022	0	2	944.588	-0.440224	26.9534	1
	Low	KrDEDR	1	2	1	IPI00420014.2	R2(Dimethyl)	0			0.572034	0	2	846.431	-13.6932	26.0289	2
	Low	eDLIrEERSR	1	3	1	IPI00420014.2	N-Term(Gln->pyro-Glu); R5(Methyl)	0.5613			0.677315	0	3	1299.65	-10.7283	23.5902	2
	High	qVLDLEDLVFTQGSHFmANKR	1	3	1	IPI00420014.2	N-Term(Gln->pyro-Glu); M17(Oxidation)	0	0	3.85401e-16	3.98667	0	3	2447.19	-4.76352	43.1438	1
	High	qLPHFTSEHIKR	1	4	1	IPI00420014.2	N-Term(Gln->pyro-Glu)	0	0	5.6984e-08	2.17896	0	3	1475.78	0.415259	31.7285	1
	Medium	IIYIAPmR	1	4	1	IPI00420014.2	M7(Oxidation)	0	0.014091	0.129249	1.23849	0	2	992.561	0.742664	30.2665	0
	High	NIEmTQEDVR	1	3	1	IPI00420014.2	M4(Oxidation)	0	0	5.95733e-06	2.25226	0	2	1250.57	0.550913	23.4086	0
	High	LLSmAKPVYHAITK	1	3	1	IPI00420014.2	M4(Oxidation)	0	0.000208	0.00017072	1.61568	0	3	1587.89	-1.25643	28.9419	0
	Low	mIDKrMWQSMcPLR	11	2	1	IPI00420014.2	M1(Oxidation); R5(Trimethyl); C11(Carbamidomethyl)	0.237			1.31979	0	2	1909.92	-3.0966	22.7539	2
	High	mQLSAELQSDTEEILSK	1	5	1	IPI00420014.2	M1(Oxidation)	0	0.000208	0.000501374	1.46649	0	2	1937.93	-1.82817	38.001	0
	High	LTLQQK	1	5	1	IPI00420014.2		0	0.002007	0.0210663	1.37976	0	2	730.446	0.746614	23.5158	0
	High	EGSASTEVLR	1	3	1	IPI00420014.2		0	0.000208	0.00017072	1.80616	0	2	1048.53	0.740333	24.8657	0
	High	EEEKLELQK	1	3	1	IPI00420014.2		0	0.00107	0.0099749	1.42305	0	2	1145.61	0.643432	25.7395	1
	Low	KDFFKK	1	5	1	IPI00420014.2		0	0.097083	1	1.1891	0	2	812.466	-0.453204	26.0749	2
	Medium	SLQYEYK	1	2	1	IPI00420014.2		0	0.011306	0.0922069	1.10156	0	2	930.458	0.963897	26.8417	0
	Medium	TYTQLVR	1	3	1	IPI00420014.2		0	0.014091	0.132988	0.913165	0	2	880.49	1.02135	27.855	0
	High	ANSNLVLQADR	1	2	1	IPI00420014.2		0	0	1.05503e-08	2.83233	0	2	1200.63	0.545846	27.9065	0
	High	SNSLISIKR	1	5	1	IPI00420014.2		0	0.002783	0.0288084	1.98696	0	2	1017.6	-3.00994	28.7377	1
	Medium	YISSQIERPIR	1	4	1	IPI00420014.2		0	0.02486	0.245844	1.04052	0	2	1361.75	-1.19007	28.8482	0
	High	HLILPEK	1	2	1	IPI00420014.2		0	0.00757	0.0873689	1.7914	0	2	849.52	0.973332	29.1293	0
	High	IVALSSSLSNAK	2	4	1	IPI00420014.2		0	0	3.86954e-09	2.64119	0	2	1189.68	1.66462	30.0994	0
	High	TGNFQVTELGR	1	3	1	IPI00420014.2		0	0	5.51826e-10	2.93039	0	2	1221.62	-1.73255	31.1133	0
	Low	KPVIVFVPSRK	1	5	1	IPI00420014.2		0	0.174411	1	1.05173	0	3	1269.8	-0.39906	31.1773	1
	High	YAQAGFEGFK	1	4	1	IPI00420014.2		0	0	4.96332e-06	2.2138	0	2	1117.53	0.625235	31.8336	0
	Medium	YVHLFPK	1	2	1	IPI00420014.2		0	0.012183	0.0951343	1.32253	0	2	903.509	-0.074979	32.3513	0
	High	NQVLVFVHSR	1	3	1	IPI00420014.2		0	0	0.00017072	2.36776	0	2	1198.67	0.368711	32.5256	0
	Low	NFPFER	1	2	1	IPI00420014.2		0	0.062408	0.661566	0.984223	0	2	809.395	1.72113	32.7707	0
	High	KPVIVFVPSR	1	5	1	IPI00420014.2		0	0	6.65657e-07	2.96984	0	2	1141.71	1.09092	32.882	0
	High	KADEVLEILK	1	2	1	IPI00420014.2		0	0	5.36972e-06	3.02766	0	2	1157.68	-0.545703	35.2814	1
	High	TLVEDLFADK	1	2	1	IPI00420014.2		0	0	7.49389e-05	2.1572	0	2	1150.6	2.71958	38.961	0
	High	AIFEIVLNR	1	2	1	IPI00420014.2		0	0.000208	0.00212289	1.25662	0	2	1074.63	-0.225759	39.0101	0
	High	DTLGLFLR	1	3	1	IPI00420014.2		0	0.000746	0.00712647	1.95104	0	2	934.536	0.849926	39.0576	0
	High	DIDAFWLQR	1	2	1	IPI00420014.2		0	0.000208	0.000261977	1.91303	0	2	1163.58	0.277673	39.4291	0
	High	HLILPEKYPPPTELLDLQPLPVSALR	1	2	1	IPI00420014.2		0	0	3.85401e-16	4.07062	0	3	2949.67	-3.94968	42.98	1
	High	GLIEIISNAAEYENIPIR	2	5	1	IPI00420014.2		0	0	2.01753e-05	2.21965	0	3	2015.07	-3.95081	44.1842	0
	High	LIILDEIHLLHDDRGPVLEALVAR	1	2	1	IPI00420014.2		0	0.000208	0.00017072	1.61395	0	3	2720.54	-2.14927	44.4598	1
	High	INVLLQAFISQLK	1	3	1	IPI00420014.2		0	0.000208	0.00017072	2.42876	0	2	1486.89	-5.27024	47.1662	0
	Low	KLPEEVVK	1	2	1	IPI00420014.2		0.331			0.974731	0	2	941.576	10.2809	24.0055	1
IPI00396378.3	Isoform B1 of Heterogeneous nuclear ribonucleoproteins A2/B1	46.1533	45.89	5	13	19	29	353	37.4067	8.95361
	A2	Sequence	# PSMs	# Proteins	# Protein Groups	Protein Group Accessions	Modifications	ΔCn	q-Value	PEP	XCorr	Probability	Charge	MH+ [Da]	ΔM [ppm]	RT [min]	# Missed Cleavages
	Low	EQFrK	1	4	1	IPI00396378.3	R4(Methyl)	0.0862			0.525599	0	2	721.388	-15.8561	24.1048	1
	Low	qEMQEVQSSrSGR	1	3	1	IPI00396378.3	N-Term(Gln->pyro-Glu); R10(Methyl)	0	0.702019	1	0.785399	0	2	1518.72	15.6594	32.5884	1
	High	qEmQEVQSSR	1	3	1	IPI00396378.3	N-Term(Gln->pyro-Glu); M3(Oxidation)	0	0.000208	0.000302041	2.7846	0	2	1220.52	0.633299	19.29	0
	High	LTDcVVmRDPASKR	1	4	1	IPI00396378.3	C4(Carbamidomethyl); M7(Oxidation)	0	0.002927	0.0297608	1.66316	0	3	1663.83	0.442812	24.6893	2
	High	GGSDGYGSGR	1	2	1	IPI00396378.3		0	0.000208	0.00017072	2.33378	0	2	912.38	-0.511572	18.1491	0
	High	SGNFGGSR	1	3	1	IPI00396378.3		0	0.000208	0.00017072	1.84329	0	2	781.358	-1.36645	19.9602	0
	High	EDTEEHHLR	1	11	2	IPI00797148.1;IPI00396378.3		0	0.000208	0.00017072	2.26531	0	2	1165.52	0.593793	20.6481	0
	High	EESGKPGAHVTVKK	1	4	1	IPI00396378.3		0	0.000397	0.00461191	1.64744	0	3	1466.8	-0.168854	20.7334	1
	Medium	EKEQFR	1	4	1	IPI00396378.3		0	0.03462	0.416754	1.24194	0	2	836.426	0.00325735	21.1625	1
	High	EESGKPGAHVTVK	1	4	1	IPI00396378.3		0	0	1.28424e-10	2.16526	0	2	1338.7	-1.58887	21.5142	0
	High	GGGGNFGPGPGSNFR	2	3	1	IPI00396378.3		0	0	2.55476e-09	3.06782	0	2	1377.63	-1.65243	28.8693	0
	High	GGNFGFGDSR	2	3	1	IPI00396378.3		0	0.000208	0.000315741	2.20147	0	2	1013.44	-0.964814	29.2841	0
	High	TLETVPLER	3	2	1	IPI00396378.3		0	0.000208	0.000323015	1.84693	0	2	1057.59	1.09884	29.9651	0
	High	KLFVGGIK	2	16	3	IPI00396378.3;IPI00797148.1;IPI00927677.1		0	0.000208	0.00017072	2.18825	0	2	861.556	0.153712	30.2033	1
	High	LFVGGIKEDTEEHHLR	3	11	2	IPI00797148.1;IPI00396378.3		0	0	3.85401e-16	4.10629	0	3	1879.97	-0.200999	30.7056	1
	High	LFVGGIK	4	16	3	IPI00396378.3;IPI00797148.1;IPI00927677.1		0	0.000208	0.000184231	1.57262	0	2	733.46	-0.402909	32.6407	0
	High	IDTIEIITDR	1	4	1	IPI00396378.3		0	0	7.52679e-07	3.08192	0	2	1188.64	-2.63561	35.0969	0
	High	GFGFVTFDDHDPVDKIVLQK	1	4	1	IPI00396378.3		0	0	6.7991e-08	2.10251	0	3	2277.15	-1.71401	39.0232	1
	High	LFIGGLSFETTEESLR	1	4	1	IPI00396378.3		0	0	3.85401e-16	3.42204	0	2	1798.92	-1.26288	41.2433	0
IPI00465248.5	Isoform alpha-enolase of Alpha-enolase	45.2706	54.84	11	18	23	28	434	47.1393	7.38623
	A2	Sequence	# PSMs	# Proteins	# Protein Groups	Protein Group Accessions	Modifications	ΔCn	q-Value	PEP	XCorr	Probability	Charge	MH+ [Da]	ΔM [ppm]	RT [min]	# Missed Cleavages
	Low	FAGrNFR	1	2	1	IPI00465248.5	R4(Trimethyl)	0			0.807984	0	2	909.493	-13.593	34.2446	1
	High	VVIGmDVAASEFFR	1	2	1	IPI00465248.5	M5(Oxidation)	0	0	1.74747e-06	2.07397	0	2	1556.77	-2.55977	38.1005	0
	High	LAmQEFmILPVGAANFR	2	2	1	IPI00465248.5	M3(Oxidation); M7(Oxidation)	0	0	2.81881e-14	2.51457	0	2	1939.97	-2.45144	39.2004	0
	High	ScNcLLLK	1	2	1	IPI00465248.5	C2(Carbamidomethyl); C4(Carbamidomethyl)	0	0.000746	0.00694408	1.57935	0	2	1007.5	-0.808392	30.493	0
	High	SGETEDTFIADLVVGLcTGQIK	1	8	1	IPI00465248.5	C17(Carbamidomethyl)	0	0	3.85401e-16	3.093	0	2	2353.16	0.0790966	46.7248	0
	High	VNQIGSVTESLQAcK	1	5	1	IPI00465248.5	C14(Carbamidomethyl)	0	0	3.85401e-16	3.58724	0	2	1633.82	-0.527023	30.675	0
	Low	SPDDPSR	1	2	1	IPI00465248.5		0	0.095071	1	1.11902	0	2	773.341	-1.66578	16.6033	0
	High	AVEHINK	2	2	1	IPI00465248.5		0	0.008473	0.0897439	1.36556	0	2	810.447	-0.195482	19.7885	0
	High	LNVTEQEK	1	1	1	IPI00465248.5		0	0.000208	0.000293641	1.88923	0	2	960.501	1.45122	22.515	0
	High	KLNVTEQEK	1	1	1	IPI00465248.5		0	0	6.74425e-09	3.05775	0	2	1088.6	1.1129	22.5396	1
	Low	EIFDSR	1	1	1	IPI00465248.5		0	0.154458	1	1.29474	0	2	766.373	0.48064	26.6275	0
	Low	GVPLYR	1	6	1	IPI00465248.5		0	0.332252	1	1.35442	0	2	704.408	-0.733148	27.6688	0
	High	IGAEVYHNLK	3	2	1	IPI00465248.5		0	0	6.53288e-08	2.58925	0	2	1143.62	0.256288	27.7944	0
	Medium	YNQLLR	2	2	1	IPI00465248.5		0	0.010686	0.0919447	1.42954	0	2	806.45	-1.86655	28.4781	0
	High	TIAPALVSK	1	1	1	IPI00465248.5		0	0.000208	0.000307342	1.91452	0	2	899.555	-1.64334	28.378	0
	Low	NFRNPLAK	1	2	1	IPI00465248.5		0			0.987278	0	2	959.543	0.435419	29.3527	1
	High	SGKYDLDFKSPDDPSR	1	2	1	IPI00465248.5		0	0.000208	0.000178585	2.36415	0	3	1826.86	1.54434	29.6693	2
	High	SGKYDLDFK	1	2	1	IPI00465248.5		0	0.000208	0.00017072	2.21064	0	2	1072.53	0.740845	30.3294	1
	High	YDLDFK	1	10	1	IPI00465248.5		0	0.008473	0.0904684	1.07915	0	2	800.384	1.64341	31.8882	0
	High	GNPTVEVDLFTSK	1	1	1	IPI00465248.5		0	0	8.47741e-07	2.21215	0	2	1406.71	-2.52874	35.0887	0
	High	YISPDQLADLYK	1	2	1	IPI00465248.5		0	0	4.95951e-12	3.12599	0	2	1425.72	-1.84119	36.8345	0
	High	DATNVGDEGGFAPNILENKEGLELLK	1	2	1	IPI00465248.5		0	0	3.16156e-11	2.92338	0	3	2743.37	-1.35571	39.0965	1
	High	HIADLAGNSEVILPVPAFNVINGGSHAGNK	1	2	1	IPI00465248.5		0	0	3.85401e-16	3.57547	0	3	3011.56	-1.83496	39.7948	0
IPI00789281.2	Isoform 3 of Protein virilizer homolog	45.015	16.3	4	18	24	26	1797	200.93	4.81787
	A2	Sequence	# PSMs	# Proteins	# Protein Groups	Protein Group Accessions	Modifications	ΔCn	q-Value	PEP	XCorr	Probability	Charge	MH+ [Da]	ΔM [ppm]	RT [min]	# Missed Cleavages
	Low	eDQFNGSPPRPQPRGPR	1	4	1	IPI00789281.2	N-Term(Gln->pyro-Glu)	0			0.712613	0	2	1917.92	-5.39236	47.6153	1
	Low	SFPTmAR	1	4	1	IPI00789281.2	M5(Oxidation)	0			0.418587	0	2	825.392	-0.461511	23.9036	0
	High	TmSINAAELK	1	2	1	IPI00789281.2	M2(Oxidation)	0	0.000208	0.00017072	2.39102	0	2	1093.56	1.2164	26.9228	0
	High	TmLTELLR	1	4	1	IPI00789281.2	M2(Oxidation)	0	0.002007	0.0180242	1.78742	0	2	992.541	-3.57075	34.8799	0
	High	mKDQGPDKENSGAIEASVK	1	4	1	IPI00789281.2	M1(Oxidation)	0	0.000208	0.00017072	1.93693	0	3	2019.96	-0.438958	24.5568	2
	Low	QLKAGTK	1	4	1	IPI00789281.2		0.2353			0.776096	0	2	745.447	-12.8395	21.9128	1
	Medium	AHSSLPDNR	1	4	1	IPI00789281.2		0	0.01628	0.169376	1.37048	0	2	996.483	-2.51722	20.9213	0
	High	LGDHLAEK	1	4	1	IPI00789281.2		0	0.000208	0.00017072	1.96099	0	2	882.469	0.694861	23.2758	0
	Medium	SEYIEPAKR	1	2	1	IPI00789281.2		0	0.026659	0.297207	1.73892	0	2	1092.57	-1.37215	23.6915	1
	High	TSSLPNHSEPDHDTDAGLER	1	4	1	IPI00789281.2		0	0	3.85401e-16	3.58311	0	3	2177.97	-1.13278	25.3064	0
	High	VVTAGSAILQK	1	4	1	IPI00789281.2		0	0	1.72432e-06	2.14467	0	2	1086.65	-1.02051	28.3244	0
	Low	NSSALHSLLKR	1	2	1	IPI00789281.2		0	0.304586	1	0.724223	0	3	1225.7	-1.63126	30.4667	1
	High	VNTDGLVLR	1	4	1	IPI00789281.2		0	0	0.00017072	2.56001	0	2	986.562	-1.4812	30.9564	0
	High	LLQEIVR	1	3	1	IPI00789281.2		0	0.001552	0.0152478	1.80976	0	2	870.542	1.52723	31.3652	0
	High	SAVGHVFSLEK	1	4	1	IPI00789281.2		0	0	1.32377e-12	3.2409	0	2	1173.63	0.595951	32.1395	0
	High	VDLIELSEK	1	2	1	IPI00789281.2		0	0	0.000139904	1.87122	0	2	1045.58	-2.15797	34.1266	0
	Low	LTELLDLYREDR	1	4	1	IPI00789281.2		0	0.183881	1	0.927647	0	2	1535.81	1.57844	36.8269	1
	High	EESPENLFLELEK	1	2	1	IPI00789281.2		0	0	5.36374e-14	3.39933	0	2	1576.78	0.648655	40.8541	0
	High	LLALLDALASHK	2	3	1	IPI00789281.2		0	0	4.44879e-16	3.38292	0	2	1264.76	-1.28207	42.0762	0
	High	LVLEHSKDDDNLDSLLDSVVGLK	1	2	1	IPI00789281.2		0	0	3.85401e-16	4.07777	0	3	2524.3	-5.83872	42.9953	1
	High	LLELILLDQTVR	2	4	1	IPI00789281.2		0	0.000208	0.00017072	1.6496	0	2	1425.87	-0.691897	43.4266	0
	High	TVLDLIVEDLQSTSEDKEK	1	3	1	IPI00789281.2		0	0	3.85401e-16	2.55179	0	3	2162.1	-1.96367	44.5206	1
	High	YAEIFQDLLALVR	1	3	1	IPI00789281.2		0	0	2.9991e-05	2.2244	0	2	1550.85	-5.78317	48.1294	0
	Low	GGFGQGIRPHDIFRQRK	1	2	1	IPI00789281.2		0.6082			0.756305	0	2	1969.08	6.99027	38.9273	2
IPI00007765.5	Stress-70 protein, mitochondrial	44.888	37.56	6	22	30	41	679	73.6348	6.16357
	A2	Sequence	# PSMs	# Proteins	# Protein Groups	Protein Group Accessions	Modifications	ΔCn	q-Value	PEP	XCorr	Probability	Charge	MH+ [Da]	ΔM [ppm]	RT [min]	# Missed Cleavages
	Low	VLENAEGAr	2	3	1	IPI00007765.5	R9(Trimethyl)	0.5029			0.87442	0	2	1000.54	-0.201405	20.2967	0
	Low	LVGAAASr	1	1	1	IPI00007765.5	R8(Trimethyl)	0.3175			1.43966	0	2	786.483	-0.308347	25.6197	0
	Low	LVGAAASr	1	1	1	IPI00007765.5	R8(Dimethyl)	0.4607			1.03045	0	2	772.467	-0.202565	25.936	0
	Low	YAEEDrrK	3	3	1	IPI00007765.5	R6(Methyl); R7(Methyl)	0.6277			0.695787	0	2	1094.55	-4.28894	36.7848	2
	Low	mRELLAR	1	3	1	IPI00007765.5	N-Term(Gln->pyro-Glu)	0	0.268396	1	0.803528	0	2	871.483	1.64279	32.8413	1
	High	qAASSLQQASLK	1	3	1	IPI00007765.5	N-Term(Gln->pyro-Glu)	0	0	2.0318e-11	3.27972	0	2	1214.64	-0.780498	27.278	0
	High	qAVTNPNNTFYATK	1	3	1	IPI00007765.5	N-Term(Gln->pyro-Glu)	0	0	4.49593e-16	2.83792	0	2	1551.74	0.537592	29.2997	0
	Medium	LVGmPAK	1	3	1	IPI00007765.5	M4(Oxidation)	0	0.04009	0.436118	0.816962	0	2	731.412	-0.306943	20.6139	0
	High	LFEmAYKK	1	3	1	IPI00007765.5	M4(Oxidation)	0	0.000208	0.00243211	1.39567	0	2	1045.54	-1.85124	27.207	1
	High	LFEmAYK	1	3	1	IPI00007765.5	M4(Oxidation)	0	0.000208	0.00253398	1.22328	0	2	917.44	-4.10631	28.5941	0
	High	AmQDAEVSK	1	4	1	IPI00007765.5	M2(Oxidation)	0	0.001552	0.0144987	1.58392	0	2	994.452	1.15615	17.482	0
	High	LYSPSQIGAFVLmK	1	2	1	IPI00007765.5	M13(Oxidation)	0	0.000746	0.00622749	1.60091	0	3	1569.84	0.914992	39.5941	0
	High	ETGVDLTKDNmALQR	1	3	1	IPI00007765.5	M11(Oxidation)	0	0	3.84501e-13	2.63866	0	3	1706.84	-0.502128	27.1483	1
	Low	RTIAPcQK	1	4	1	IPI00007765.5	C6(Carbamidomethyl)	0	0.553145	1	1.27398	0	2	973.523	-1.35611	20.525	1
	Low	TIAPcQK	1	4	1	IPI00007765.5	C5(Carbamidomethyl)	0	0.056478	0.571875	1.38328	0	2	817.428	5.609	19.8932	0
	High	NTTIPTK	3	12	2	IPI00003865.1;IPI00007765.5		0	0.000746	0.00734333	2.04927	0	2	774.436	0.201798	21.3716	0
	High	VLENAEGAR	2	3	1	IPI00007765.5		0	0.000208	0.000767087	2.21423	0	2	958.496	0.632145	21.5623	0
	Low	VREAAEK	1	4	1	IPI00007765.5		0	0.546004	1	1.41765	0	2	802.442	0.568272	16.3245	1
	Low	YAEEDRR	1	3	1	IPI00007765.5		0	0.384107	1	0.950096	0	2	938.432	-0.397178	18.674	1
	High	NTTIPTKK	2	4	1	IPI00007765.5		0	0.003935	0.0434884	1.46542	0	2	902.53	-0.434705	20.2502	1
	High	KDSETGENIR	2	3	1	IPI00007765.5		0	0.000208	0.00017072	2.53847	0	2	1148.56	0.837644	20.5224	1
	High	DSETGENIR	1	3	1	IPI00007765.5		0	0.000746	0.00633934	1.41564	0	2	1020.46	0.164553	20.4648	0
	High	LKEEISK	1	3	1	IPI00007765.5		0.0166	0.000746	0.00745598	1.77665	0	2	846.493	0.287618	21.9975	1
	High	RYDDPEVQK	1	2	1	IPI00007765.5		0	0.007698	0.0876793	2.40316	0	2	1149.55	0.52494	22.4147	1
	High	ETGVDLTK	1	3	1	IPI00007765.5		0	0.000746	0.0067796	1.78702	0	2	862.452	0.101444	23.9449	0
	High	TTPSVVAFTADGER	1	3	1	IPI00007765.5		0	0	2.32628e-09	2.80494	0	2	1450.72	0.0920409	31.8738	0
	High	DAGQISGLNVLR	1	3	1	IPI00007765.5		0	0	9.40455e-13	3.54209	0	2	1242.68	0.458977	33.5213	0
	High	VQQTVQDLFGR	1	3	1	IPI00007765.5		0	0	1.46062e-07	2.93797	0	2	1290.68	0.827968	33.9624	0
	High	NAVITVPAYFNDSQR	1	3	1	IPI00007765.5		0	0	1.45303e-15	2.40101	0	2	1694.84	-2.84691	35.1696	0
	High	VINEPTAAALAYGLDK	1	2	1	IPI00007765.5		0	0	1.58565e-15	2.82217	0	2	1645.88	-2.04936	36.03	0
	High	AQFEGIVTDLIR	2	4	1	IPI00007765.5		0	0	2.9289e-10	3.09413	0	2	1361.74	0.229177	40.4616	0
	Medium	LLGQFTLIGIPPAPR	1	3	1	IPI00007765.5		0	0.046221	0.436118	1.04598	0	2	1592.95	0.0495162	41.764	0
IPI00797148.1	Isoform 2 of Heterogeneous nuclear ribonucleoprotein A1	43.7629	59.55	10	11	17	31	267	29.3682	9.14404
	A2	Sequence	# PSMs	# Proteins	# Protein Groups	Protein Group Accessions	Modifications	ΔCn	q-Value	PEP	XCorr	Probability	Charge	MH+ [Da]	ΔM [ppm]	RT [min]	# Missed Cleavages
	Low	LFIGGLSFETTDESLr	1	8	1	IPI00797148.1	R16(Methyl)	0.1199			3.00838	0	2	1798.92	-1.26288	41.2433	0
	Low	qEmASASSSQrGR	4	7	1	IPI00797148.1	N-Term(Gln->pyro-Glu); M3(Oxidation); R11(Dimethyl)	0	0.188116	1	1.10876	0	2	1421.65	1.20854	18.4091	1
	High	IEVIEImTDR	1	7	1	IPI00797148.1	M7(Oxidation)	0	0	1.78093e-09	2.34164	0	2	1234.64	0.772281	31.9651	0
	High	GFGFVTYATVEEVDAAmNARPHK	1	8	1	IPI00797148.1	M17(Oxidation)	0	0	3.85401e-16	2.70142	0	3	2526.2	-2.44824	38.9088	0
	Medium	YHTVNGHNcEVRK	1	6	1	IPI00797148.1	C9(Carbamidomethyl)	0	0.032112	0.385666	0.97829	0	3	1613.76	-2.08597	21.5076	1
	High	YHTVNGHNcEVR	1	6	1	IPI00797148.1	C9(Carbamidomethyl)	0	0	1.96831e-11	2.43341	0	3	1485.66	-0.253237	22.2618	0
	High	EDTEEHHLR	1	11	2	IPI00797148.1;IPI00396378.3		0	0.000208	0.00017072	2.26531	0	2	1165.52	0.593793	20.6481	0
	Low	EPEQLRK	1	13	2	IPI00797148.1;IPI00927677.1		0			0.750291	0	2	899.495	0.274905	20.6734	1
	High	NQGGYGGSSSSSSYGSGR	1	4	1	IPI00797148.1		0	0	3.85401e-16	4.01057	0	2	1694.7	0.636203	21.2253	0
	High	SESPKEPEQLRK	2	7	1	IPI00797148.1		0	0	0.00017072	2.5082	0	3	1427.75	1.72029	22.4928	2
	High	SESPKEPEQLR	2	7	1	IPI00797148.1		0	0.000208	0.00017072	1.78374	0	2	1299.65	-0.847665	23.5995	1
	High	EDSQRPGAHLTVK	3	7	1	IPI00797148.1		0	0.000397	0.00363136	2.01191	0	2	1437.74	-1.93671	24.3853	0
	High	SSGPYGGGGQYFAKPR	1	6	1	IPI00797148.1		0	0	1.17081e-10	2.53748	0	3	1628.77	-5.57793	28.4266	0
	High	DYFEQYGK	1	6	1	IPI00797148.1		0	0.000746	0.00637855	1.57997	0	2	1049.46	1.02185	29.6467	0
	High	KIFVGGIK	2	16	3	IPI00396378.3;IPI00797148.1;IPI00927677.1		0	0.000208	0.00017072	2.18825	0	2	861.556	0.153712	30.2033	1
	High	IFVGGIKEDTEEHHLR	3	11	2	IPI00797148.1;IPI00396378.3		0	0	3.85401e-16	4.10629	0	3	1879.97	-0.200999	30.7056	1
	High	IFVGGIK	4	16	3	IPI00396378.3;IPI00797148.1;IPI00927677.1		0	0.000208	0.000184231	1.57262	0	2	733.46	-0.402909	32.6407	0
	High	LFIGGLSFETTDESLR	1	8	1	IPI00797148.1		0	0	3.85401e-16	2.67356	0	2	1784.9	-2.90017	40.7608	0
IPI00888085.1	Isoform 4 of Serrate RNA effector molecule homolog	41.9129	35.48	11	24	40	52	871	100.085	6.01123
	A2	Sequence	# PSMs	# Proteins	# Protein Groups	Protein Group Accessions	Modifications	ΔCn	q-Value	PEP	XCorr	Probability	Charge	MH+ [Da]	ΔM [ppm]	RT [min]	# Missed Cleavages
	Low	GDDWNDrEWDr	1	5	1	IPI00888085.1	R7(Trimethyl); R11(Dimethyl)	0			0.596882	0	2	1533.7	17.211	36.8286	1
	Low	QIVrNDIK	1	6	1	IPI00888085.1	R4(Trimethyl)	0.5029			0.849825	0	2	1027.62	-10.334	34.1686	1
	Low	NrmVR	1	6	1	IPI00888085.1	R2(Trimethyl); M3(Oxidation)	0.1408			0.605357	0	2	733.42	8.74985	20.2156	1
	Low	rGDDWNDrEWDR	1	5	1	IPI00888085.1	R1(Dimethyl); R8(Dimethyl)	0.7687			0.6503	0	3	1675.73	-15.9563	26.8778	2
	Low	gEYrDYDR	1	5	1	IPI00888085.1	N-Term(Gln->pyro-Glu); R4(Trimethyl)	0.3065			0.426756	0	2	1098.47	-9.27758	25.5663	1
	Low	aGAGLGDGErK	1	5	1	IPI00888085.1	N-Term(Gln->pyro-Glu); R10(Methyl)	0.2462			0.48927	0	2	1027.51	-7.96079	28.8965	1
	Low	cGIIHVR	1	7	1	IPI00888085.1	N-Term(Gln->pyro-Glu); C1(Carbamidomethyl)	0	0.06685	0.741733	1.26645	0	2	837.441	0.999709	31.7455	0
	High	qAENDSSNDDKTK	1	5	1	IPI00888085.1	N-Term(Gln->pyro-Glu)	0	0	4.17532e-10	2.66886	0	2	1434.6	-0.619549	16.1446	1
	Low	RYPGFmR	1	7	1	IPI00888085.1	M6(Oxidation)	0	0.565641	1	1.04544	0	2	942.461	-0.326906	26.878	1
	Low	YPGFmR	1	7	1	IPI00888085.1	M5(Oxidation)	0	0.121862	1	0.411295	0	2	786.357	-4.52493	27.4128	0
	High	mEGGTENDLR	1	5	1	IPI00888085.1	M1(Oxidation)	0	0.000208	0.00017072	2.39505	0	2	1137.48	-0.293677	21.4431	0
	High	mLDAAVIK	1	5	1	IPI00888085.1	M1(Oxidation)	0	0.005213	0.0580977	1.20847	0	2	876.486	-0.44956	28.2678	0
	High	DAAGLEcKPRPLHK	1	6	1	IPI00888085.1	C7(Carbamidomethyl)	0	0.000208	0.000453366	1.53107	0	3	1591.84	-0.210458	24.7807	0
	High	AEIISLcK	1	7	1	IPI00888085.1	C7(Carbamidomethyl)	0	0.000917	0.00836241	1.89553	0	2	933.506	-1.23418	30.5185	0
	High	LREcELSPGVNR	2	6	1	IPI00888085.1	C4(Carbamidomethyl)	0	0	3.85401e-16	2.56892	0	2	1429.72	-1.34372	26.6235	1
	Low	TcSLFmR	1	7	1	IPI00888085.1	C2(Carbamidomethyl); M6(Oxidation)	0	0.098675	1	1.06616	0	2	930.418	0.385636	29.7124	0
	High	AGAGLGDGER	2	5	1	IPI00888085.1		0	0	6.08689e-07	2.72348	0	2	902.433	0.0948066	21.3438	0
	Low	KEEGRAGAGLGDGER	2	5	1	IPI00888085.1		0	0.666016	1	0.888033	0	2	1501.75	7.43689	20.4643	2
	Low	SRGEYR	1	5	1	IPI00888085.1		0	0.319057	1	1.37849	0	2	767.379	-0.872479	18.5431	1
	Low	ERSDYDR	1	5	1	IPI00888085.1		0	0.09276	1	1.14284	0	2	940.411	-0.538858	18.6572	1
	High	AGAGLGDGERK	1	5	1	IPI00888085.1		0	0.000208	0.000563189	1.75373	0	2	1030.53	-0.508567	20.4834	1
	High	KDPEQEVEK	2	7	1	IPI00888085.1		0	0.000208	0.00017072	2.18591	0	2	1101.54	0.759951	21.2999	1
	High	HAEKIEEVKK	1	8	1	IPI00888085.1		0	0	9.18798e-07	2.31504	0	2	1210.68	0.649114	21.4498	2
	Low	YHPDEVGKR	1	4	1	IPI00888085.1		0	0.053729	0.503659	1.44755	0	2	1100.55	-0.429003	21.6891	1
	High	SKYHPDEVGKR	1	4	1	IPI00888085.1		0	0.000208	0.00110542	1.72677	0	3	1315.68	0.151984	21.9031	2
	High	ESLSEEEAQK	2	7	1	IPI00888085.1		0	0	4.65723e-05	1.92525	0	2	1149.53	1.89739	22.1997	0
	High	NINGITQHK	2	6	1	IPI00888085.1		0	0.002007	0.0207343	1.44743	0	2	1024.55	0.299873	23.3334	0
	Medium	KHIFNK	2	8	1	IPI00888085.1		0	0.011207	0.0919764	0.9568	0	2	786.462	-0.578305	23.4099	1
	High	ILEQEEEEEQAGKPGEPSKK	1	5	1	IPI00888085.1		0	0	5.09997e-10	2.65164	0	3	2255.1	-0.823644	24.6141	1
	High	VALSEPQPERR	1	7	1	IPI00888085.1		0	0.008226	0.0889943	1.92769	0	2	1281.69	1.08381	24.8852	1
	High	ILEQEEEEEQAGKPGEPSK	1	5	1	IPI00888085.1		0	0.000208	0.00117935	1.48781	0	3	2127.01	-0.156194	25.0976	0
	High	VALSEPQPER	1	7	1	IPI00888085.1		0	0.000208	0.00017072	2.24887	0	2	1125.59	-1.65336	25.2035	0
	High	NIAPNISR	2	7	1	IPI00888085.1		0	0.001879	0.0177242	1.82948	0	2	884.495	0.0444837	25.6265	0
	High	FVTSNTQELGK	1	7	1	IPI00888085.1		0	0	4.65439e-08	2.20496	0	2	1223.63	0.552157	26.2473	0
	Low	KTNDKDEK	1	5	1	IPI00888085.1		0			0.637516	0	2	977.493	2.8031	26.5303	2
	High	LIHTLDDR	1	6	1	IPI00888085.1		0	0.007975	0.0884913	1.596	0	2	982.532	0.437396	26.7947	0
	Low	FKGPEFVR	2	7	1	IPI00888085.1		0	0.071506	0.861216	1.47009	0	2	979.541	4.70085	30.7963	1
	High	LTPLLSVR	2	7	1	IPI00888085.1		0	0.000397	0.00512064	1.73449	0	2	898.571	-1.29304	34.4357	0
	Medium	LLLYLR	2	8	1	IPI00888085.1		0	0.010568	0.0919447	1.63805	0	2	790.519	0.206265	37.6629	0
	Low	DLDAPDDVDFF	1	6	1	IPI00888085.1		0	0.290705	1	0.903266	0	2	1268.53	-0.693647	40.7028	0
	High	EVAFFNNFLTDAK	1	8	1	IPI00888085.1		0	0	4.61289e-16	2.98546	0	2	1515.75	-0.510236	41.3699	0
IPI00984839.1	ATP-dependent RNA helicase DDX3X isoform 2	39.9715	37.67	10	19	28	33	661	73.111	7.18115
	A2	Sequence	# PSMs	# Proteins	# Protein Groups	Protein Group Accessions	Modifications	ΔCn	q-Value	PEP	XCorr	Probability	Charge	MH+ [Da]	ΔM [ppm]	RT [min]	# Missed Cleavages
	Low	FDDrGR	1	9	1	IPI00984839.1	R4(Dimethyl)	0.4934			0.770081	0	2	793.384	-13.8249	28.254	1
	Low	NrEATK	2	5	1	IPI00984839.1	R2(Trimethyl)	0.527			1.04582	0	2	760.419	-15.9877	20.2315	1
	Low	RIVEQDTMPPKGVr	1	7	1	IPI00984839.1	R14(Methyl)	0.1842			1.23728	0	3	1639.91	10.4958	30.4718	2
	Low	rIVEQDTmPPK	1	7	1	IPI00984839.1	R1(Dimethyl); M8(Oxidation)	0.6798			0.571249	0	2	1357.73	12.3459	17.9907	1
	High	IVEQDTmPPK	1	7	1	IPI00984839.1	M7(Oxidation)	0	0.000208	0.00017072	1.56991	0	2	1173.58	0.530768	21.7477	0
	Low	LVDmmER	1	6	1	IPI00984839.1	M4(Oxidation); M5(Oxidation)	0			0.542868	0	2	925.411	-0.96717	20.5158	0
	Medium	EIQmLAR	1	7	1	IPI00984839.1	M4(Oxidation)	0	0.026984	0.308496	1.52905	0	2	876.461	0.0533149	24.6699	0
	Low	HTmmFSATFPK	1	7	1	IPI00984839.1	M3(Oxidation); M4(Oxidation)	0	0.186665	1	0.766432	0	2	1329.6	-0.416943	30.1619	0
	High	IGLDFcK	1	7	1	IPI00984839.1	C6(Carbamidomethyl)	0	0.00954	0.0916987	1.50664	0	2	852.429	1.08348	32.6496	0
	High	GcHLLVATPGR	1	6	1	IPI00984839.1	C2(Carbamidomethyl)	0	0	6.70801e-05	2.64596	0	2	1180.62	-0.877487	28.9604	0
	High	GLDISNVK	1	3	1	IPI00984839.1		0	0.007975	0.0885373	1.48911	0	2	845.472	-0.561458	26.2845	0
	High	VGSTSENITQK	1	6	1	IPI00984839.1		0	0	1.94216e-08	1.92401	0	2	1163.59	-0.0375908	21.0849	0
	Low	YTRPTPVQK	2	8	1	IPI00984839.1		0	0.078103	0.982165	1.70419	0	2	1089.61	0.783155	21.7316	0
	Low	GRFDDR	1	9	1	IPI00984839.1		0	0.160162	1	1.04182	0	2	765.364	0.407703	21.7878	1
	High	NINITK	1	4	1	IPI00984839.1		0	0.005347	0.0612023	1.14936	0	2	702.414	-1.32474	24.2606	0
	High	SDYDGIGSR	1	6	1	IPI00984839.1		0	0.002007	0.0222256	1.50302	0	2	969.427	-0.774751	24.5515	0
	Low	KFSYR	1	6	1	IPI00984839.1		0	0.303448	1	1.13968	0	2	700.377	-0.477407	24.8869	1
	High	DKDAYSSFGSR	1	10	1	IPI00984839.1		0	0	0.00017072	2.49599	0	2	1232.55	-0.696907	25.9538	1
	High	DREEALHQFR	2	6	1	IPI00984839.1		0	0.000208	0.00017072	1.81462	0	2	1300.64	-1.31509	27.1147	1
	High	FSGGFGAR	1	7	1	IPI00984839.1		0	0.000746	0.00762062	1.55534	0	2	798.389	-0.88035	27.5132	0
	Medium	HAIPIIK	2	8	1	IPI00984839.1		0	0.045829	0.436118	1.6645	0	2	791.513	-0.822655	28.9462	0
	High	SSFFSDR	1	6	1	IPI00984839.1		0	0.003338	0.0404451	1.53672	0	2	845.379	-0.372256	30.4636	0
	High	SPILVATAVAAR	1	6	1	IPI00984839.1		0	0	3.97417e-11	3.01707	0	2	1168.71	0.923171	33.3668	0
	High	VGNLGLATSFFNER	1	3	1	IPI00984839.1		0	0	2.01167e-05	2.57508	0	2	1524.78	0.703386	39.5353	0
	High	HVINFDLPSDIEEYVHR	1	6	1	IPI00984839.1		0	0	8.66403e-15	2.85922	0	3	2083.02	-1.82346	40.121	0
	High	DLLDLLVEAK	1	7	1	IPI00984839.1		0	0	2.54037e-09	2.46475	0	2	1128.65	-2.45273	43.7643	0
	High	SFLLDLLNATGK	1	3	1	IPI00984839.1		0	0	1.44922e-11	2.61882	0	2	1291.72	-2.59627	44.9293	0
	High	TAAFLLPILSQIYSDGPGEALR	2	4	1	IPI00984839.1		0	0	3.85401e-16	5.2299	0	3	2332.25	-0.879221	47.554	0
IPI00019380.1	Nuclear cap-binding protein subunit 1	39.4463	26.08	2	17	24	33	790	91.7805	6.43018
	A2	Sequence	# PSMs	# Proteins	# Protein Groups	Protein Group Accessions	Modifications	ΔCn	q-Value	PEP	XCorr	Probability	Charge	MH+ [Da]	ΔM [ppm]	RT [min]	# Missed Cleavages
	Low	KDAEMDrIFANTESYLK	1	1	1	IPI00019380.1	R7(Methyl)	0			0.650793	0	2	2045.03	12.2919	39.5023	2
	Low	lArQHKr	1	2	1	IPI00019380.1	N-Term(Gln->pyro-Glu); R3(Dimethyl); R7(Dimethyl)	0			0.546126	0	2	947.575	-15.4726	31.5632	2
	Low	lSYHQR	1	1	1	IPI00019380.1	N-Term(Gln->pyro-Glu)	0.0962			0.467994	0	2	786.398	11.0307	16.5126	0
	Low	KDAEmDR	6	1	1	IPI00019380.1	M5(Oxidation)	0	0.289913	1	0.811503	0	2	880.384	0.919288	15.2268	1
	High	NHPQmIAVLVDK	1	1	1	IPI00019380.1	M5(Oxidation)	0	0.000208	0.00017072	2.37484	0	2	1380.73	-0.582622	30.2736	0
	High	LDTmNTTcVDR	1	1	1	IPI00019380.1	M4(Oxidation); C8(Carbamidomethyl)	0	0	6.97139e-09	2.39645	0	2	1341.58	0.856088	22.4882	0
	High	FImILTEHLVR	1	2	1	IPI00019380.1	M3(Oxidation)	0	0	6.48606e-10	2.82236	0	2	1387.77	-2.30672	38.0991	0
	High	LLcTVAR	1	1	1	IPI00019380.1	C3(Carbamidomethyl)	0	0.002485	0.0248684	1.43507	0	2	832.471	0.0235016	26.4042	0
	Low	RSDDDDR	1	2	1	IPI00019380.1		0	0.588154	1	0.952864	0	2	878.359	-1.18177	14.444	1
	High	VESAQSEQK	1	2	1	IPI00019380.1		0	0	1.4482e-06	2.63452	0	2	1005.49	0.988649	15.644	0
	High	HSDENDGGQPHKR	1	1	1	IPI00019380.1		0	0.004076	0.046414	1.42167	0	3	1476.66	2.8544	16.0745	1
	Low	ELEEAKEK	1	2	1	IPI00019380.1		0.235			1.52719	0	2	975.5	0.81842	19.4502	1
	Low	ELYEKK	1	1	1	IPI00019380.1		0	0.153702	1	1.06194	0	2	809.439	-2.282	20.9585	1
	High	KDGVLEEQIER	2	2	1	IPI00019380.1		0	0	9.13273e-08	2.38	0	2	1315.68	-0.233474	28.3105	1
	Medium	FHEVFK	2	1	1	IPI00019380.1		0	0.013973	0.121344	2.02868	0	2	806.419	-0.578258	28.3548	0
	High	DGVLEEQIER	1	2	1	IPI00019380.1		0	0.000208	0.00017072	2.39795	0	2	1187.59	1.077	29.7444	0
	High	TLAESDEGKLHVLR	1	1	1	IPI00019380.1		0	0	2.60993e-10	2.26063	0	2	1567.85	1.55613	29.9323	1
	High	SFSHSFSALAK	2	1	1	IPI00019380.1		0	0	1.02808e-05	2.82013	0	2	1181.6	2.39897	31.591	0
	High	IFANTESYLK	1	1	1	IPI00019380.1		0	0	2.51872e-06	2.46981	0	2	1185.62	1.84191	32.3576	0
	High	ANNYNEAVYLVR	1	1	1	IPI00019380.1		0	0	2.51463e-09	2.69926	0	2	1425.71	-0.21162	32.9154	0
	High	ATNDEIFSILK	1	1	1	IPI00019380.1		0	0	1.41561e-09	2.37625	0	2	1250.66	0.208022	38.8863	0
	High	NLFLVIFQR	1	2	1	IPI00019380.1		0	0.000208	0.00130928	1.3979	0	2	1149.68	-0.988007	45.0848	0
	High	LTIYTTLVGLLNAR	2	1	1	IPI00019380.1		0	0	1.322e-14	3.38524	0	2	1547.91	-5.38607	47.2461	0
	High	LLPEKLTIYTTLVGLLNAR	1	1	1	IPI00019380.1		0	0	3.85401e-16	3.71719	0	2	2128.26	-6.24995	47.3352	1
IPI00219018.7	Glyceraldehyde-3-phosphate dehydrogenase	37.2574	41.49	6	12	12	18	335	36.0304	8.45557
	A2	Sequence	# PSMs	# Proteins	# Protein Groups	Protein Group Accessions	Modifications	ΔCn	q-Value	PEP	XCorr	Probability	Charge	MH+ [Da]	ΔM [ppm]	RT [min]	# Missed Cleavages
	High	VVDLmAHmASK	1	3	1	IPI00219018.7	M5(Oxidation); M8(Oxidation)	0	0	8.22388e-07	2.10149	0	2	1233.6	-0.853316	24.0253	0
	High	VVDLmAHmASKE	1	3	1	IPI00219018.7	M5(Oxidation); M8(Oxidation)	0	0	1.6064e-09	2.63925	0	2	1362.64	-2.65191	24.4644	1
	High	LTGmAFR	2	4	1	IPI00219018.7	M4(Oxidation)	0	0.000397	0.00282988	1.60593	0	2	811.413	0.147036	26.0677	0
	High	VIHDNFGIVEGLmTTVHAITATQK	1	3	1	IPI00219018.7	M13(Oxidation)	0	0	3.85401e-16	3.79186	0	3	2611.35	-2.03832	41.9019	0
	High	VIISAPSADAPmFVmGVNHEK	1	4	1	IPI00219018.7	M12(Oxidation); M15(Oxidation)	0	0	1.11326e-05	2.20724	0	3	2245.1	1.24878	32.7496	0
	High	VPTANVSVVDLTcR	2	3	1	IPI00219018.7	C13(Carbamidomethyl)	0	0	3.85401e-16	4.30426	0	2	1530.79	-0.268043	32.8239	0
	High	TVDGPSGK	2	3	1	IPI00219018.7		0	0.000208	0.000185971	1.84436	0	2	760.383	-1.21558	17.1465	0
	High	AGAHLQGGAK	3	4	1	IPI00219018.7		0	0	1.22172e-07	2.81467	0	2	909.49	0.154673	19.0825	0
	Medium	YDDIKK	1	3	1	IPI00219018.7		0	0.018859	0.171734	1.61463	0	2	781.408	-0.893906	20.001	1
	High	VGVNGFGR	1	3	1	IPI00219018.7		0	0.000208	0.000546394	1.77005	0	2	805.43	-1.58534	27.5037	0
	High	GALQNIIPASTGAAK	2	3	1	IPI00219018.7		0	0	9.11377e-12	2.98419	0	2	1411.79	1.65811	32.4774	0
	High	LVINGNPITIFQER	1	3	1	IPI00219018.7		0	0	6.27634e-15	3.08049	0	2	1613.9	-0.449313	39.8143	0
IPI00027230.3	Endoplasmin	36.9581	27.15	6	16	24	36	803	92.4113	4.84326
	A2	Sequence	# PSMs	# Proteins	# Protein Groups	Protein Group Accessions	Modifications	ΔCn	q-Value	PEP	XCorr	Probability	Charge	MH+ [Da]	ΔM [ppm]	RT [min]	# Missed Cleavages
	Low	FAFQAEVNr	1	3	1	IPI00027230.3	R9(Methyl)	0.4454			0.657456	0	2	1095.57	9.18574	29.4872	0
	Low	GVVDSDDLPLNVSr	2	2	1	IPI00027230.3	R14(Dimethyl)	0.6053			1.35242	0	2	1513.79	0.531992	34.1573	0
	Low	qDKIYFMAGSSrK	1	3	1	IPI00027230.3	N-Term(Gln->pyro-Glu); R12(Methyl)	0.7343			0.551095	0	3	1527.74	-13.2883	34.2665	2
	Low	imKAQAYQTGK	1	3	1	IPI00027230.3	N-Term(Gln->pyro-Glu); M2(Oxidation)	0.665			0.687099	0	2	1237.63	0.865084	30.5023	1
	High	IYFmAGSSR	1	3	1	IPI00027230.3	M4(Oxidation)	0	0.001552	0.0155798	1.5331	0	2	1047.49	0.707949	28.3275	0
	Low	YLNFVK	1	3	1	IPI00027230.3		0.5591			0.561748	0	2	783.44	0.256319	28.9836	0
	Low	KPKTKK	1	2	1	IPI00027230.3		0.2366			1.00119	0	2	729.498	-0.439983	17.7145	2
	High	FDESEKTK	1	2	1	IPI00027230.3		0	0.005213	0.061136	0.93939	0	2	983.469	1.05898	19.25	1
	Low	KSDYIK	1	4	1	IPI00027230.3		0	0.176372	1	1.59932	0	2	753.415	1.2415	21.9632	1
	Medium	ESTAEKDEL	2	3	1	IPI00027230.3		0	0.03462	0.416509	1.27378	0	2	1021.47	0.209726	24.2267	1
	Low	NLGTIAK	1	2	1	IPI00027230.3		0	0.188828	1	0.839199	0	2	716.429	-1.77365	25.0303	0
	High	LGVIEDHSNR	3	3	1	IPI00027230.3		0	0	8.97582e-06	2.40042	0	2	1139.58	0.284995	25.7827	0
	High	DISTNYYASQK	1	2	1	IPI00027230.3		0	0	2.12291e-05	2.02141	0	2	1289.6	0.785467	26.1597	0
	Medium	EFGTNIK	1	4	1	IPI00027230.3		0	0.031578	0.372139	0.720109	0	2	808.421	0.891362	26.7651	0
	High	EAESSPFVER	1	2	1	IPI00027230.3		0	0	3.79936e-05	2.37126	0	2	1150.54	-0.130535	27.614	0
	High	TFEINPR	2	4	1	IPI00027230.3		0	0.000746	0.00625853	1.5398	0	2	876.459	1.4781	29.1858	0
	High	ELISNASDALDK	1	5	2	IPI00027230.3;IPI00414676.6		0	0	3.18028e-12	3.09548	0	2	1275.64	0.284331	29.6365	0
	High	SGYLLPDTK	2	2	1	IPI00027230.3		0	0.000208	0.000433966	1.98514	0	2	993.526	0.391529	30.292	0
	High	FAFQAEVNR	2	3	1	IPI00027230.3		0	0	0.00017072	1.97501	0	2	1081.54	1.65303	31.5304	0
	High	GLFDEYGSK	2	4	1	IPI00027230.3		0	0.000208	0.00017072	1.27637	0	2	1015.47	0.410686	32.3696	0
	High	GVVDSDDLPLNVSR	1	2	1	IPI00027230.3		0	0	3.85401e-16	2.8957	0	2	1485.76	0.740002	32.5719	0
	High	ELISNASDALDKIR	2	5	2	IPI00027230.3;IPI00414676.6		0	0	2.65708e-14	2.54125	0	2	1544.83	-0.561444	33.7578	1
	High	LIINSLYK	1	3	1	IPI00027230.3		0	0	0.00017072	2.0578	0	2	963.588	0.208297	34.7199	0
	High	SILFVPTSAPR	1	2	1	IPI00027230.3		0	0	4.02675e-08	2.69206	0	2	1187.68	-0.984845	35.6317	0
	High	IKEDEDDKTVLDLAVVLFETATLR	2	2	1	IPI00027230.3		0	0	0.00017072	2.43216	0	3	2733.44	-4.11865	48.0356	2
	High	SGTSEFLNK	1	2	1	IPI00027230.3		0	0.000208	0.000306131	1.4147	0	2	982.483	-0.85437	27.1485	0
IPI00411733.4	Isoform 1 of Putative ATP-dependent RNA helicase DHX30	36.637	29.98	4	24	38	42	1194	133.855	8.77783
	A2	Sequence	# PSMs	# Proteins	# Protein Groups	Protein Group Accessions	Modifications	ΔCn	q-Value	PEP	XCorr	Probability	Charge	MH+ [Da]	ΔM [ppm]	RT [min]	# Missed Cleavages
	Low	ISAVSVAQr	1	3	1	IPI00411733.4	R9(Trimethyl)	0.1931			1.6301	0	2	972.583	-0.287562	29.9087	0
	Low	WQDrSSR	1	3	1	IPI00411733.4	R4(Dimethyl)	0.5389			0.770456	0	2	962.472	-8.26378	24.3269	1
	Low	QGKFKPNSVTYr	1	3	1	IPI00411733.4	R12(Dimethyl)	0.554			0.954879	0	3	1452.82	14.7597	25.8391	1
	Low	mFSLDSFrK	1	1	1	IPI00411733.4	N-Term(Gln->pyro-Glu); R8(Methyl)	0.3243			0.502145	0	2	1127.55	-7.13178	28.2031	1
	Low	yrVLADR	1	3	1	IPI00411733.4	N-Term(Gln->pyro-Glu); R2(Trimethyl)	0.2484			1.18149	0	2	917.515	-5.64348	22.9169	1
	Low	gPcGSFDVrK	1	3	1	IPI00411733.4	N-Term(Gln->pyro-Glu); C3(Carbamidomethyl); R9(Methyl)	0.6962			0.481746	0	3	1119.52	-0.822379	23.9561	1
	Low	cLHPLLVVVScLTR	1	3	1	IPI00411733.4	N-Term(Gln->pyro-Glu); C1(Carbamidomethyl); C11(Carbamidomethyl)	0			0.533113	0	2	1649.89	-0.595547	47.774	0
	Low	yDLKTK	1	4	1	IPI00411733.4	N-Term(Gln->pyro-Glu)	0			0.516305	0	2	750.4	-3.66876	21.4175	1
	Low	iSAVSVAQR	2	3	1	IPI00411733.4	N-Term(Gln->pyro-Glu)	0			0.865362	0	2	913.508	-2.49914	28.6005	0
	Low	IHmPEK	1	4	1	IPI00411733.4	M3(Oxidation)	0			0.580447	0	2	770.387	0.325919	18.953	0
	High	GGALLFcTVGILLR	1	3	1	IPI00411733.4	C7(Carbamidomethyl)	0	0	3.46286e-13	2.97259	0	2	1489.85	-2.54713	46.8977	0
	Low	LPPMcVNPTPGGTISR	1	1	1	IPI00411733.4	C5(Carbamidomethyl)	0.6939			0.598434	0	2	1696.83	-13.462	39.0092	0
	High	SGNILLHK	2	3	1	IPI00411733.4		0	0.00954	0.0919447	1.22864	0	2	881.52	-0.818378	27.1973	0
	High	AEVDKVK	1	3	1	IPI00411733.4		0	0.003188	0.0366505	1.08988	0	2	788.452	0.373371	19.1155	1
	Low	KIDAER	1	3	1	IPI00411733.4		0	0.137843	1	1.35396	0	2	731.405	0.304196	19.2463	1
	Medium	ELGETQR	1	3	1	IPI00411733.4		0	0.020484	0.171921	1.29012	0	2	832.416	-0.0242025	20.3015	0
	Medium	AVDSPNIK	1	4	1	IPI00411733.4		0	0.012183	0.0967875	1.13736	0	2	843.457	-0.605523	22.8845	0
	Medium	ALGISHAK	1	3	1	IPI00411733.4		0	0.021788	0.177461	1.35674	0	2	796.468	-0.107273	23.9095	0
	High	SVEVEGYGSK	1	3	1	IPI00411733.4		0	0	6.84029e-06	2.00926	0	2	1054.5	-0.807242	24.6375	0
	High	VIQIATSSSTAK	1	3	1	IPI00411733.4		0	0	1.1411e-10	2.86887	0	2	1205.67	-0.818032	25.9702	0
	High	FKPNSVTYR	1	3	1	IPI00411733.4		0	0.000746	0.00618027	1.74358	0	2	1111.59	0.899972	26.261	0
	High	VSHELGPSLR	2	3	1	IPI00411733.4		0	0	0.00017072	1.82086	0	3	1094.59	-1.77589	27.5946	0
	Low	NVGFQVR	1	3	1	IPI00411733.4		0	0.094013	1	1.15607	0	2	819.443	-5.00279	28.6075	0
	Low	SLGLVDR	1	3	1	IPI00411733.4		0	0.058053	0.617752	1.17767	0	2	759.436	-0.255085	28.8458	0
	High	DPFSSSLQNR	1	3	1	IPI00411733.4		0	0	1.90691e-08	2.5427	0	2	1150.55	-0.439728	28.919	0
	High	NELFDAAK	1	3	1	IPI00411733.4		0	0.000587	0.00531454	1.97708	0	2	907.452	-0.211003	29.3139	0
	High	EYLTTLGQR	1	3	1	IPI00411733.4		0	0.002007	0.0213642	2.01525	0	2	1080.57	1.22014	30.1518	0
	High	TAVEFLSK	1	4	1	IPI00411733.4		0	0.000208	0.00017072	1.58844	0	2	894.494	0.818058	31.1556	0
	High	AIFQQPPVGVR	1	3	1	IPI00411733.4		0	0.000208	0.00017072	2.22057	0	2	1211.69	-1.07394	32.041	0
	Low	FIHGLIK	1	3	1	IPI00411733.4		0	0.104239	1	1.21378	0	2	827.514	0.39325	32.245	0
	High	LQSDDILPLGK	1	3	1	IPI00411733.4		0	0.000208	0.00017072	1.70862	0	2	1198.67	-0.363156	33.9299	0
	High	ALTQFPLPK	1	3	1	IPI00411733.4		0	0.000917	0.00888828	1.38236	0	2	1014.6	0.142885	34.2126	0
	High	ATISLSDSDLLR	1	3	1	IPI00411733.4		0	0	0.00017072	2.43731	0	2	1290.69	-1.82975	35.2864	0
	High	IPQLLLER	1	3	1	IPI00411733.4		0	0.000208	0.00017072	2.01793	0	2	981.61	0.484347	35.8098	0
	High	NLLNSVIGR	1	3	1	IPI00411733.4		0	0.000208	0.00017072	2.0032	0	2	985.58	1.25353	36.14	0
	High	TPLENLVLQAK	1	4	1	IPI00411733.4		0	0	3.91596e-07	2.39926	0	2	1225.72	1.60503	36.4693	0
	High	DSGPLSDPITGKPYVPLLEAEEVR	1	3	1	IPI00411733.4		0	0.000208	0.000409581	1.31011	0	3	2582.33	-2.41752	39.7408	0
	High	AIVLAAIFR	1	3	1	IPI00411733.4		0	0.000208	0.00017072	2.1999	0	2	973.618	-1.00299	41.995	0
	High	DVNTDFLLILLK	1	3	1	IPI00411733.4		0	0	6.62091e-08	2.14483	0	2	1403.81	-3.91861	47.2392	0
IPI00021840.1	40S ribosomal protein S6	36.2217	43.78	4	11	18	28	249	28.663	10.8433
	A2	Sequence	# PSMs	# Proteins	# Protein Groups	Protein Group Accessions	Modifications	ΔCn	q-Value	PEP	XCorr	Probability	Charge	MH+ [Da]	ΔM [ppm]	RT [min]	# Missed Cleavages
	Low	TGErKR	1	3	1	IPI00021840.1	R4(Methyl)	0.5782			0.617605	0	2	760.434	-11.3446	30.8918	2
	Low	gHScYrPR	1	4	2	IPI00021840.1;IPI00955970.1	N-Term(Gln->pyro-Glu); C4(Carbamidomethyl); R6(Methyl)	0.5			0.691269	0	2	1029.45	-15.0856	26.3486	0
	Low	gHScYRPR	1	4	2	IPI00021840.1;IPI00955970.1	N-Term(Gln->pyro-Glu); C4(Carbamidomethyl)	0.5275			0.425604	0	2	1015.44	-7.99616	20.2754	0
	High	qGVLTHGR	2	2	1	IPI00021840.1	N-Term(Gln->pyro-Glu)	0	0.003935	0.0445098	1.92413	0	2	850.451	-2.10809	25.2218	0
	High	mKLNISFPATGcQK	1	2	1	IPI00021840.1	M1(Oxidation); C12(Carbamidomethyl)	0	0	3.85401e-16	3.36004	0	2	1610.8	-0.0535484	31.6952	1
	Low	GHScYRPR	1	4	2	IPI00021840.1;IPI00955970.1	C4(Carbamidomethyl)	0	0.099385	1	1.14267	0	2	1032.48	-0.532704	20.1673	0
	High	LNISFPATGcQK	1	2	1	IPI00021840.1	C10(Carbamidomethyl)	0	0	2.19471e-09	2.45626	0	2	1335.67	0.128618	32.6866	0
	Low	RQEQIAK	2	2	1	IPI00021840.1		0	0.480393	1	1.64435	0	2	872.495	0.394869	18.9538	1
	High	NKEEAAEYAK	2	2	1	IPI00021840.1		0	0.000208	0.00017072	2.35368	0	2	1152.55	-0.672887	21.1188	1
	High	QGVLTHGR	1	2	1	IPI00021840.1		0	0.00107	0.0110007	1.2491	0	2	867.48	0.186277	22.1936	0
	Low	RIALKK	1	2	1	IPI00021840.1		0	0.615737	1	1.10735	0	2	728.515	0.482668	23.0002	2
	Medium	TFYEKR	2	2	1	IPI00021840.1		0	0.01107	0.0919463	1.64285	0	2	843.435	-1.00198	23.4007	1
	Low	RLSSLR	1	2	1	IPI00021840.1		0	0.109866	1	1.79661	0	2	731.452	-0.200012	24.317	1
	High	LIEVDDERK	1	2	1	IPI00021840.1		0	0	0.000100509	2.01213	0	2	1116.59	-0.168578	25.5215	1
	High	LIEVDDER	2	2	1	IPI00021840.1		0	0.000208	0.00017072	2.26432	0	2	988.495	0.241084	26.7017	0
	High	KGEKDIPGLTDTTVPR	1	3	1	IPI00021840.1		0	0	3.85401e-16	3.50597	0	3	1726.94	1.3219	29.6493	2
	High	KLFNLSK	2	2	1	IPI00021840.1		0	0.000208	0.000542274	1.90436	0	2	849.52	1.26072	31.2078	1
	High	LFNLSK	1	3	2	IPI00021840.1;IPI00955970.1		0	0.006164	0.0764517	1.52537	0	2	721.425	0.806766	31.6133	0
	High	LFNLSKEDDVR	1	2	1	IPI00021840.1		0	0	4.51151e-07	2.78851	0	2	1335.69	0.444914	32.0194	1
	High	DIPGLTDTTVPR	2	3	1	IPI00021840.1		0	0	8.97876e-11	2.85543	0	2	1284.68	-1.41	32.35	0
	Low	RTGERK	1	4	2	IPI00021840.1;IPI00955970.1		0.1698			0.880264	0	2	746.413	-17.9842	20.9209	2
IPI00008557.6	Insulin-like growth factor 2 mRNA-binding protein 1	35.5857	43.5	2	17	28	37	577	63.4412	9.20264
	A2	Sequence	# PSMs	# Proteins	# Protein Groups	Protein Group Accessions	Modifications	ΔCn	q-Value	PEP	XCorr	Probability	Charge	MH+ [Da]	ΔM [ppm]	RT [min]	# Missed Cleavages
	Low	EGATIrNITK	1	2	2	IPI00008557.6;IPI00658000.3	R6(Methyl)	0.6478			1.05685	0	2	1116.64	3.43665	40.7533	1
	Low	rGGFGSrGQPR	1	1	1	IPI00008557.6	R1(Dimethyl); R7(Trimethyl)	0			1.04576	0	2	1244.67	-19.7629	28.5459	2
	High	qQQVDIPLR	1	1	1	IPI00008557.6	N-Term(Gln->pyro-Glu)	0	0.000397	0.00306166	2.35187	0	2	1079.59	1.09911	31.4318	0
	Low	AEQEImKK	1	2	1	IPI00008557.6	M6(Oxidation)	0	0.070985	0.852571	0.742996	0	2	992.508	-0.615992	17.7651	1
	Medium	mILEImHK	1	1	1	IPI00008557.6	M1(Oxidation); M6(Oxidation)	0	0.014447	0.14533	1.21842	0	2	1046.54	-1.24502	27.6032	0
	High	mVIITGPPEAQFK	1	9	3	IPI00008557.6;IPI00658000.3;IPI00922068.1	M1(Oxidation)	0	0	1.62021e-08	2.59572	0	2	1446.77	-0.277606	32.6198	0
	Medium	ENAGAAEK	1	2	2	IPI00008557.6;IPI00658000.3		0	0.022456	0.188962	1.04647	0	2	789.372	-1.93992	14.849	0
	Low	KENAGAAEK	1	2	2	IPI00008557.6;IPI00658000.3		0	0.088677	1	0.964676	0	2	917.469	0.127889	15.0628	1
	High	VEQDTETK	1	2	1	IPI00008557.6		0	0.000208	0.00166313	0.962295	0	2	949.447	-0.137076	15.8606	0
	High	KVEQDTETK	2	2	1	IPI00008557.6		0	0	0.00017072	2.18544	0	2	1077.54	-0.799844	16.7898	1
	High	VPASAAGR	2	2	1	IPI00008557.6		0	0.001402	0.0138541	1.38472	0	2	728.404	-1.33443	17.8572	0
	Low	IDVHRK	1	2	2	IPI00008557.6;IPI00658000.3		0	0.12322	1	1.13351	0	2	767.453	0.525137	19.7991	1
	High	VFAEHK	1	2	1	IPI00008557.6		0	0.004508	0.0524271	1.32315	0	2	730.387	-1.57278	21.2128	0
	High	IAPPETPDSK	1	2	1	IPI00008557.6		0	0.002007	0.0208954	1.17335	0	2	1054.54	0.675769	23.2546	0
	High	LETHIR	1	2	1	IPI00008557.6		0	0.006885	0.0826259	1.34177	0	2	768.436	-0.509672	23.7079	0
	High	DQTPDENDQVIVK	1	2	1	IPI00008557.6		0	0	1.94021e-07	2.16414	0	2	1500.72	-0.496267	25.671	0
	High	AIETFSGK	1	2	1	IPI00008557.6		0	0.000208	0.00025804	1.5267	0	2	852.446	-0.127609	26.1271	0
	Low	NIPPQLR	1	2	1	IPI00008557.6		0	0.147387	1	0.852118	0	2	837.493	-0.90333	26.7113	0
	High	RLEIEHSVPK	2	2	1	IPI00008557.6		0	0.002783	0.0288637	1.80532	0	3	1207.68	-0.821331	27.4532	1
	High	EEVKLETHIR	2	2	1	IPI00008557.6		0	0.000208	0.00017072	1.39517	0	3	1253.68	-1.55965	27.5649	1
	High	ILAHNNFVGR	3	3	2	IPI00008557.6;IPI00658000.3		0	0	5.69347e-05	2.36071	0	2	1140.63	-0.798621	28.1563	0
	High	LKEENFFGPK	1	2	1	IPI00008557.6		0	0	5.58365e-07	2.3706	0	2	1208.63	-0.026688	32.062	1
	Low	IRDILAQVK	1	2	1	IPI00008557.6		0	0.252257	1	1.64526	0	2	1055.66	0.40645	32.1795	1
	High	ISYSGQFLVK	1	2	1	IPI00008557.6		0	0	7.27725e-05	1.80026	0	2	1141.62	-0.57986	33.491	0
	High	TVNELQNLTAAEVVVPR	2	2	1	IPI00008557.6		0	0	3.85401e-16	3.3883	0	2	1853.01	-1.01426	37.0556	0
	High	ITISSLQDLTLYNPER	1	2	1	IPI00008557.6		0	0	4.09196e-12	3.3402	0	2	1862.98	-2.55215	39.7459	0
	High	LLVPTQYVGAIIGK	2	1	1	IPI00008557.6		0	0	4.2107e-16	2.78948	0	2	1471.89	-1.56763	40.8257	0
	Low	QLSRFASASIK	1	2	1	IPI00008557.6		0.5789			0.641586	0	2	1207.67	-9.12398	32.9618	1
	Low	RGGFGSRGQPR	1	1	1	IPI00008557.6		0.2994			1.10399	0	2	1174.62	4.52213	33.3644	2
IPI00299573.12	60S ribosomal protein L7a	33.9439	58.65	3	14	19	22	266	29.977	10.6089
	A2	Sequence	# PSMs	# Proteins	# Protein Groups	Protein Group Accessions	Modifications	ΔCn	q-Value	PEP	XCorr	Probability	Charge	MH+ [Da]	ΔM [ppm]	RT [min]	# Missed Cleavages
	Low	GDVPTKrPPVLR	1	3	1	IPI00299573.12	R7(Methyl)	0.381			1.04129	0	2	1348.81	-0.591575	33.8256	1
	Low	LGrLVHR	1	2	1	IPI00299573.12	R3(Dimethyl)	0.52			0.841605	0	2	878.557	-12.8938	30.5387	1
	Medium	mGVPYcIIK	1	2	1	IPI00299573.12	M1(Oxidation); C6(Carbamidomethyl)	0	0.0125	0.0995123	1.39211	0	2	1096.55	-0.755712	32.197	0
	High	TcTTVAFTQVNSEDKGALAK	1	2	1	IPI00299573.12	C2(Carbamidomethyl)	0	0	1.2429e-05	1.97251	0	3	2141.05	-0.251343	30.1207	1
	High	AKELATK	1	2	1	IPI00299573.12		0	0.001713	0.0168741	1.97166	0	2	760.456	-1.07611	18.2613	1
	Low	YRPETK	2	2	1	IPI00299573.12		0	0.336145	1	0.89274	0	2	793.42	-0.418223	18.9895	0
	Low	YDEIRR	1	2	1	IPI00299573.12		0			0.501991	0	2	851.438	1.19161	22.4116	1
	High	VAPAPAVVK	2	2	1	IPI00299573.12		0	0	0.00017072	2.32434	0	2	851.535	0.34477	24.0567	0
	Medium	RPPVLR	1	3	1	IPI00299573.12		0	0.02251	0.194989	2.15438	0	2	737.477	-1.37349	24.6193	0
	High	TNYNDRYDEIRR	1	2	1	IPI00299573.12		0	0	0.00017072	2.06408	0	3	1614.76	-0.274058	25.9177	2
[truncated: 4,300 more rows]

## Sheet: GO pathways
	ID	Description	Count	GeneRatio	geneID
GO:0005515	GO:0005515	protein binding	290	290/368	RBM15/NCL/HSPA8/KRT1/TUBB/TUBB4B/RPL4/HSP90AB1/HSP90AA1/TUBB4A/PABPC1/KIF11/TUBA4A/HNRNPM/TUBA1A/HNRNPC/RPL5/RPLP0/HSPA5/HNRNPU/ACTB/EEF1A1/UBA1/PARP1/MATR3/PABPC4/EEF2/PRMT5/RPS3A/DDX17/SNRNP200/HNRNPA2B1/ENO1/HSPA9/HNRNPA1/SRRT/NCBP1/GAPDH/HSP90B1/DHX30/RPS6/IGF2BP1/RPL7A/DHX9/PRPF8/MYBBP1A/ALDOA/KLHL22/DHX15/LDHB/ATP5A1/XRCC6/AIFM1/DDX23/IGF2BP3/KPNB1/SRSF1/DDX5/HNRNPH1/SF3B1/SFPQ/PCNA/XPO1/RB…
GO:0097159	GO:0097159	organic cyclic compound binding	290	290/368	RBM15/NCL/HSPA8/TUBB/TUBB4B/RPL4/TUBB2A/HSP90AB1/HSP90AA1/TUBB4A/PABPC1/KIF11/RPL6/TUBA4A/HNRNPM/TUBA1A/HNRNPC/RPL5/RPLP0/RPL3/HSPA5/HNRNPU/ACTB/EEF1A1/UBA1/PARP1/MATR3/DDX21/PABPC4/EEF2/RPL8/MTHFD1/PRMT5/RPS3A/DDX17/SNRNP200/HNRNPA2B1/ENO1/KIAA1429/HSPA9/HNRNPA1/SRRT/NCBP1/GAPDH/HSP90B1/DHX30/RPS6/IGF2BP1/RPL7A/DHX9/PRPF8/GANAB/MYBBP1A/ALDOA/DHX15/LDHB/ATP5A1/XRCC6/AIFM1/DDX23/IGF2BP3/KPNB1/SRSF…
GO:1901363	GO:1901363	heterocyclic compound binding	290	290/368	RBM15/NCL/HSPA8/TUBB/TUBB4B/RPL4/TUBB2A/HSP90AB1/HSP90AA1/TUBB4A/PABPC1/KIF11/RPL6/TUBA4A/HNRNPM/TUBA1A/HNRNPC/RPL5/RPLP0/RPL3/HSPA5/HNRNPU/ACTB/EEF1A1/UBA1/PARP1/MATR3/DDX21/PABPC4/EEF2/RPL8/MTHFD1/PRMT5/RPS3A/DDX17/SNRNP200/HNRNPA2B1/ENO1/KIAA1429/HSPA9/HNRNPA1/SRRT/NCBP1/GAPDH/HSP90B1/DHX30/RPS6/IGF2BP1/RPL7A/DHX9/PRPF8/GANAB/MYBBP1A/ALDOA/DHX15/LDHB/ATP5A1/XRCC6/AIFM1/DDX23/IGF2BP3/KPNB1/SRSF…
GO:0036094	GO:0036094	small molecule binding	164	164/368	RBM15/NCL/HSPA8/TUBB/TUBB4B/TUBB2A/HSP90AB1/HSP90AA1/TUBB4A/PABPC1/KIF11/TUBA4A/HNRNPM/TUBA1A/HNRNPC/HSPA5/HNRNPU/ACTB/EEF1A1/UBA1/PARP1/MATR3/DDX21/PABPC4/EEF2/MTHFD1/DDX17/SNRNP200/HNRNPA2B1/HSPA9/HNRNPA1/GAPDH/HSP90B1/DHX30/IGF2BP1/DHX9/DHX15/LDHB/ATP5A1/XRCC6/AIFM1/DDX23/IGF2BP3/SRSF1/PHGDH/DDX5/HNRNPH1/SFPQ/RBMX/PGK1/SRSF6/VCP/SKIV2L2/SRSF7/GTPBP4/RBM10/GNL3/CKB/HNRNPF/CCT2/STK38/HNRNPD/THRA…
GO:0043167	GO:0043167	ion binding	143	143/368	HSPA8/TUBB/TUBB4B/TUBB2A/HSP90AB1/HSP90AA1/TUBB4A/KIF11/TUBA4A/TUBA1A/HSPA5/HNRNPU/ACTB/EEF1A1/UBA1/PARP1/MATR3/DDX21/EEF2/MTHFD1/DDX17/SNRNP200/ENO1/HSPA9/HSP90B1/DHX30/DHX9/DHX15/ATP5A1/XRCC6/AIFM1/DDX23/KPNB1/NPEPPS/DDX5/PGK1/VCP/SKIV2L2/SRSF7/GTPBP4/RBM10/GNL3/CKB/CCT2/STK38/THRAP3/TRIM28/CAD/MOV10/ATP5B/TUFM/DDX50/CANX/YWHAE/GARS/XRCC5/RUVBL1/IMPDH2/FARSB/HSPH1/RARS/PLS3/MYH10/PRKCSH/MARS/AS…
GO:0097367	GO:0097367	carbohydrate derivative binding	104	104/368	HSPA8/TUBB/TUBB4B/TUBB2A/HSP90AB1/HSP90AA1/TUBB4A/KIF11/TUBA4A/TUBA1A/HSPA5/HNRNPU/ACTB/EEF1A1/UBA1/DDX21/EEF2/MTHFD1/DDX17/SNRNP200/HSPA9/HSP90B1/DHX30/DHX9/DHX15/ATP5A1/XRCC6/DDX23/DDX5/PGK1/VCP/SKIV2L2/GTPBP4/GNL3/CKB/CCT2/STK38/THRAP3/CAD/MOV10/ATP5B/TUFM/DDX50/CANX/VCL/GARS/XRCC5/RUVBL1/FARSB/HSPH1/RARS/MYH10/MARS/EPRS/TRAP1/AARS/TARS/MYH9/MSH2/DDX54/EIF4A3/C1QBP/CTPS1/HSPA4/QARS/LONP1/MCM6/…
GO:0016787	GO:0016787	hydrolase activity	77	77/368	HSPA8/TUBB/TUBB4B/TUBB2A/HSP90AA1/TUBB4A/KIF11/TUBA4A/TUBA1A/HSPA5/EEF1A1/DDX21/EEF2/MTHFD1/DDX17/SNRNP200/DHX30/DHX9/GANAB/DHX15/ATP5A1/XRCC6/DDX23/NPEPPS/DDX5/PCNA/VCP/SKIV2L2/GTPBP4/GNL3/CAD/MOV10/ATP5B/TUFM/DDX50/EXOSC10/PGAM5/XRCC5/RUVBL1/MYH10/USP9X/AARS/MYH9/MSH2/DDX54/EIF4A3/EXOSC9/PRSS3/RPS3/ATP5C1/LONP1/MCM6/SMC1A/GNB2/DDX27/PPA1/USP5/RUVBL2/XRN2/EIF4A2/DIS3/MOGS/G3BP1/DDX18/KIF15/APEX1…
GO:0016740	GO:0016740	transferase activity	38	38/368	UBA1/PARP1/PRMT5/GAPDH/MYBBP1A/PGK1/CKB/STK38/TRIM28/CAD/ASH2L/FTSJ3/SHMT2/PRMT1/GTF3C4/GOT2/CS/OAT/HADHA/CBLL1/SRPK2/ACAT1/CLASP2/ACLY/WDR5/PKM/ILF2/CKMT1A/FASN/GOT1/PRPS1/GART/RPN1/SRPK1/NAA15/CDK18/CDK12/PYGL
GO:0016874	GO:0016874	ligase activity	20	20/368	UBA1/MTHFD1/TRIM28/CAD/GARS/FARSB/RARS/MARS/EPRS/AARS/TARS/CTPS1/QARS/UBA2/CBLL1/KARS/ACLY/GART/PAICS/LARS
GO:0003682	GO:0003682	chromatin binding	17	17/368	HNRNPC/ACTB/PRMT5/DHX30/SF3B1/RBMX/HIST1H1E/HIST1H1C/PELP1/CDC5L/TPR/SAFB/SHMT2/SMC1A/RUVBL2/APEX1/DNAJC1
GO:0003735	GO:0003735	structural constituent of ribosome	16	16/368	RPL4/RPL6/RPL5/RPLP0/RPL3/RPL8/RPS3A/RPS6/RPL7A/UBA52/RPS2/RPS4X/RPSA/RPS3/RPL7/RPL10A
GO:0022892	GO:0022892	substrate-specific transporter activity	16	16/368	ATP5A1/KPNB1/XPO1/AP1B1/ATP5B/IPO5/CSE1L/ATP5C1/IPO9/USO1/AP2A1/SLC25A3/SLC25A13/SLC3A2/KPNA2/SFXN1
GO:0048037	GO:0048037	cofactor binding	16	16/368	PARP1/GAPDH/LDHB/AIFM1/PHGDH/MDH1/SHMT2/SDHA/GOT2/OAT/HADHA/ACAT1/ACLY/FASN/GOT1/PYGL
GO:0000989	GO:0000989	transcription factor binding transcription factor activity	15	15/368	PRMT5/DDX17/ENO1/DDX5/NPM1/PRPF6/THRAP3/TRIM28/WDR77/DDX54/SRSF2/C1QBP/RBM14/APEX1/PSMC3
GO:0016491	GO:0016491	oxidoreductase activity	15	15/368	MTHFD1/GAPDH/LDHB/AIFM1/PHGDH/LDHA/MDH2/IMPDH2/MDH1/SDHA/HADHA/PYCR1/APEX1/FASN/GLRX3
GO:0016829	GO:0016829	lyase activity	11	11/368	ENO1/ALDOA/XRCC6/XRCC5/SHMT2/RPS3/HADHA/APEX1/FASN/GOT1/PAICS
GO:0005200	GO:0005200	structural constituent of cytoskeleton	11	11/368	TUBB/TUBB4B/KRT2/TUBB2A/TUBB4A/TUBA4A/TUBA1A/ACTB/KRT6B/KRT9/TLN1
GO:0043021	GO:0043021	ribonucleoprotein complex binding	11	11/368	HSPA5/PRMT5/NPM1/PRPF6/PES1/RPSA/C1QBP/BOP1/SRP68/SRP72/NAA15
GO:0003700	GO:0003700	sequence-specific DNA binding transcription factor activity	9	9/368	ENO1/TRIM28/HNRNPAB/YBX1/HNRNPK/GTF2I/TBR1/PA2G4/PURA
GO:0022857	GO:0022857	transmembrane transporter activity	7	7/368	ATP5A1/ATP5B/ATP5C1/SLC25A3/SLC25A13/SLC3A2/SFXN1
GO:0030246	GO:0030246	carbohydrate binding	7	7/368	KRT1/GANAB/ALDOA/CANX/GPI/BSG/PYGL
GO:0008047	GO:0008047	enzyme activator activity	7	7/368	VCP/PGAM5/GTF3C4/UBA2/GNB2L1/DNAJC1/PSME3
GO:0004857	GO:0004857	enzyme inhibitor activity	6	6/368	NPM1/IPO5/ANXA5/AHSG/GNB2L1/CCAR2
GO:0003823	GO:0003823	antigen binding	5	5/368	HSPA8/HSP90AB1/HSP90AA1/YWHAE/PKM
GO:0008289	GO:0008289	lipid binding	5	5/368	VCP/ANXA5/PCLO/CLINT1/PYGL
GO:0016853	GO:0016853	isomerase activity	4	4/368	PDIA4/GPI/PDIA6/FKBP4
GO:0033218	GO:0033218	amide binding	4	4/368	KPNB1/SRP68/TNPO1/KPNA2
GO:0060589	GO:0060589	nucleoside-triphosphatase regulator activity	4	4/368	IPO5/PGAM5/IPO7/DNAJC1
GO:0061134	GO:0061134	peptidase regulator activity	4	4/368	VCP/AHSG/GNB2L1/PSME3
GO:0090079	GO:0090079	translation regulator activity, nucleic acid binding	4	4/368	PABPC1/EEF2/LARP1/PURA
GO:0008144	GO:0008144	drug binding	3	3/368	FKBP4/FASN/PYGL
GO:0060090	GO:0060090	binding, bridging	3	3/368	RBM14/FKBP4/ST13
GO:0019207	GO:0019207	kinase regulator activity	3	3/368	NPM1/AHSG/GNB2L1
GO:0004871	GO:0004871	signal transducer activity	3	3/368	EEF1D/GNB2/FLNA
GO:0008641	GO:0008641	small protein activating enzyme activity	2	2/368	UBA1/UBA2
GO:0032947	GO:0032947	protein complex scaffold	2	2/368	GNB2L1/EIF3B
GO:0005487	GO:0005487	nucleocytoplasmic transporter activity	2	2/368	XPO1/TPR
GO:0051540	GO:0051540	metal cluster binding	2	2/368	RPS3/GLRX3
GO:0030235	GO:0030235	nitric-oxide synthase regulator activity	2	2/368	HSP90AB1/HSP90AA1
GO:0005055	GO:0005055	laminin receptor activity	1	1/368	RPSA
GO:0005088	GO:0005088	Ras guanyl-nucleotide exchange factor activity	1	1/368	RANBP10
GO:0005201	GO:0005201	extracellular matrix structural constituent	1	1/368	COL4A2
GO:0030280	GO:0030280	structural constituent of epidermis	1	1/368	KRT10
GO:0050840	GO:0050840	extracellular matrix binding	1	1/368	RPSA
GO:0046790	GO:0046790	virion binding	1	1/368	HSP90B1
GO:1901681	GO:1901681	sulfur compound binding	1	1/368	HADHA
GO:0005246	GO:0005246	calcium channel regulator activity	1	1/368	GNB2
GO:0015459	GO:0015459	potassium channel regulator activity	1	1/368	YWHAE
GO:0016248	GO:0016248	channel inhibitor activity	1	1/368	GNB2L1
GO:0030337	GO:0030337	DNA polymerase processivity factor activity	1	1/368	PCNA
GO:0043028	GO:0043028	cysteine-type endopeptidase regulator activity involved in apoptotic process	1	1/368	GNB2L1
GO:0030371	GO:0030371	translation repressor activity	1	1/368	PURA

## Sheet: biological pathways
	ID	Description	GeneRatio	BgRatio	pvalue	p.adjust	qvalue	geneID	Count
hsa03040	hsa03040	Spliceosome	34/199	128/5894	4.45e-22	9.36e-21	3.28e-21	HSPA8/HSPA1A/HNRNPM/HNRNPC/HNRNPU/SNRNP200/HNRNPA1/NCBP1/PRPF8/DHX15/DDX23/SRSF1/DDX5/SF3B1/RBMX/SRSF6/SRSF7/SF3B3/PRPF6/SRSF4/U2SURP/PCBP1/CDC5L/HNRNPK/TRA2B/TRA2A/EIF4A3/SRSF2/SNRPA/THOC2/SRSF10/SNRNP40/ACIN1/SF3A1	34
hsa03010	hsa03010	Ribosome	16/199	92/5894	5.13e-08	5.39e-07	1.89e-07	RPL4/RPL6/RPL5/RPLP0/RPL3/RPL8/RPS3A/RPS6/RPL7A/UBA52/RPS2/RPS4X/RPSA/RPS3/RPL7/RPL10A	16
hsa03013	hsa03013	RNA transport	17/199	152/5894	1.2e-05	8.39e-05	2.94e-05	PABPC1/EEF1A1/PABPC4/PRMT5/NCBP1/KPNB1/XPO1/TPR/EIF3A/EIF4A3/EIF4B/THOC2/EIF4A2/EIF3B/PNN/EIF3I/ACIN1	17
hsa05130	hsa05130	Pathogenic Escherichia coli infection	10/199	58/5894	1.95e-05	0.000102213	3.59e-05	NCL/TUBB/TUBB4B/TUBB2A/TUBB4A/TUBA4A/TUBA1A/ACTB/EZR/CTTN	10
hsa00970	hsa00970	Aminoacyl-tRNA biosynthesis	10/199	63/5894	4.12e-05	0.000156244	5.48e-05	GARS/FARSB/RARS/MARS/EPRS/AARS/TARS/QARS/KARS/LARS	10
hsa04141	hsa04141	Protein processing in endoplasmic reticulum	17/199	168/5894	4.46e-05	0.000156244	5.48e-05	HSPA8/HSPA1A/HSP90AB1/HSP90AA1/HSPA5/HSP90B1/GANAB/VCP/PDIA4/CANX/HSPH1/PRKCSH/MOGS/HSPA4L/PDIA6/RPN1/DNAJC1	17
hsa03015	hsa03015	mRNA surveillance pathway	11/199	83/5894	9.46e-05	0.000283658	9.95e-05	PABPC1/PABPC4/NCBP1/CPSF2/CPSF6/EIF4A3/CPSF1/PABPN1/PNN/ACIN1/GSPT1	11
hsa03018	hsa03018	RNA degradation	9/199	71/5894	0.000577332	0.0015155	0.000531753	PABPC1/PABPC4/ENO1/HSPA9/SKIV2L2/EXOSC10/EXOSC9/XRN2/DIS3	9
hsa00010	hsa00010	Glycolysis / Gluconeogenesis	8/199	65/5894	0.00141768	0.00330793	0.00116068	ENO1/GAPDH/ALDOA/LDHB/PGK1/LDHA/GPI/PKM	8
hsa00620	hsa00620	Pyruvate metabolism	6/199	40/5894	0.00202093	0.00424396	0.00148911	LDHB/LDHA/MDH2/MDH1/ACAT1/PKM	6
hsa03050	hsa03050	Proteasome	6/199	45/5894	0.00372903	0.00711906	0.00249791	PSMD2/PSMD7/PSMC3/PSMD1/PSME3/PSMD13	6
hsa04612	hsa04612	Antigen processing and presentation	8/199	78/5894	0.0045333	0.00793328	0.00278361	HSPA8/HSPA1A/HSP90AB1/HSP90AA1/HSPA5/CANX/HSPA4/PSME3	8
hsa00330	hsa00330	Arginine and proline metabolism	6/199	54/5894	0.00920449	0.0148688	0.00521712	CKB/GOT2/OAT/PYCR1/CKMT1A/GOT1	6
hsa03008	hsa03008	Ribosome biogenesis in eukaryotes	7/199	81/5894	0.0189852	0.0284778	0.00999221	XPO1/GTPBP4/GNL3/RBM28/XRN2/NOP56/GNL2	7

## Sheet: Sheet4
.	Figure 7-source file 1. RBM15 associated splicing factors
Accession	Description	Score	Coverage	# Proteins	# Unique Peptides	# Peptides	# PSMs	# AAs	MW [kDa]	calc. pI
IPI00457142.4	splicing factor U2AF 35 kDa subunit-like	1.67	10.96	4	1	3	7	219	25.1	6.67
IPI00470590.3	splicing factor 3A subunit 1 isoform 2	0	4.4	2	4	4	4	728	81.6	5.34
IPI00215884.4	Isoform ASF-1 of Serine/arginine-rich splicing factor 1	25.14	48.39	6	9	12	16	248	27.7	10.36
IPI00026089.4	Splicing factor 3B subunit 1	22.11	11.81	4	12	17	27	1304	145.7	7.09
IPI00012345.2	Isoform SRP55-1 of Serine/arginine-rich splicing factor 6	20.19	32.85	5	4	15	38	344	39.6	11.43
IPI00300371.5	Isoform 1 of Splicing factor 3B subunit 3	16.52	11.67	3	9	17	22	1217	135.5	5.26
IPI00000015.2	Serine/arginine-rich splicing factor 4	12.8	35.83	3	1	23	35	494	56.6	11.52
IPI00220302.1	Isoform 1 of Pre-mRNA-splicing regulator WTAP	6.2	14.9	2	5	6	11	396	44.2	5.19
IPI00179964.5	Isoform 1 of Polypyrimidine tract-binding protein 1	5.44	18.64	12	10	11	12	531	57.2	9.17
