# Supplementary material for: Cross-talk between PRMT1-mediated methylation and ubiquitylation on RBM15 controls RNA splicing
Source: eLife journal article supplement (doi:10.7554/elife.07938), 2015-11-17
Supplement: supp [file elife-07938-supp-v1.zip › elife_poa_e07938_Supplementary_File_1.xlsx]

## Sheet: Sheet1
Supplementary table 1. Real-time PCR Primers
Cmpl-exon9minus-F	5’-GGACTGGAAGCCTGGATCTCC-3’
Cmpl-exon9 minus-R	5’-catgcctcagtctcctgtag-3
Cmpl-exon9plus-F	5’-CCCGCGATCTCGCTACCGT -3
Cmpl-exon9plus-R	5’-CACTAGATGCAGAGCGGTCACC -3’
cmpl-72minus-F	5'-GGCAGCACCCATCGTCCTGG
cmpl-72minus-R	5-GAGCCTGGCGCGCAGCTT
cmpl-tr-f	5-GCAGCCCAAGAGACCTGTTATC
cmpl-tr-R	5-TGCCTCAGTCTCCTTCCAGTC
gata1s forward	ACC ACC AGC CCA GTC TT
gata1s reverse	CAG TTG AGG CAG GGT AGA GC
Gata1s FAM/TAMRA	/56-FAM/CCA TAT GCC GGC TGG GCC TA/36-TAMSp/
gata1 full-length forward	ACCACCAGCCCAGTCTT
gata1 full-length reverse	TGA TTC TGG TGT GGA GGA CA
gata1 full-length probe	/56-FAM/CCA GAG GCT CCA TGG AGT TCC CT/36-TAMSp/
cnot4 #1 forward QPCR	AGG AAA TGC AGG CGG GTA AAC AC
cnot4 #1 Reverse QPCR	GTT TGT CAA TGG GGC TCT GCA G
5PRMT1V2-1	CGC CTC TTG AAG AAG TGT CC
3PRMT1V2-1	GAA GAG GTG CCG GTT ATG AA
PRMT1-f	CCA GTG GAG AAG GTG GAC AT
PRMT1-R	CTC CCA CCA GTG GAT CTT GT
RBM15 forward #2	TCC CAC CTT GTG AGT TCT CC
RBM15 reverse #2	GTC AGC GCC AAG TTT TCT CT
Aml1a1 forward	AAC CCT CAG CCT CAG AGT CA
Aml1a1 reverse	CCA CAT TCT GCC TTC CTC AT
Aml1b/c forward	CCC ACC GTG GTC CTA CGA T
AMLb/c reverse	CTG GCA CGT CCA GGT GAA
