# Supplementary material for: Cross-talk between PRMT1-mediated methylation and ubiquitylation on RBM15 controls RNA splicing
Source: eLife journal article supplement (doi:10.7554/elife.07938), 2015-11-17
Supplement: supp [file elife-07938-supp-v1.zip › elife_poa_e07938_Supplementary_File_2.xlsx]

## Sheet: Sheet1
Supplementary Table 2. shRNA sequences for knocking down CNOT4, RBM15
shRBM15#1	GCGGAATACAAGACTCTGAA
shRBM15#2	CCAATGGTTATGCCATTCTT
shPRMT1#1	TATGAAACATGGAGTTGCG
shPRMT1#2	AGTAATCTTTGGATGTCCAT
cnot4#1	TCTTCACATCAGAAACAA
cnot4#2	CTTGGAGATAGATGATAT
