# Supplementary figures and images for: Cross-talk between PRMT1-mediated methylation and ubiquitylation on RBM15 controls RNA splicing
Source: eLife journal article supplement (doi:10.7554/elife.07938), 2015-11-17

**A**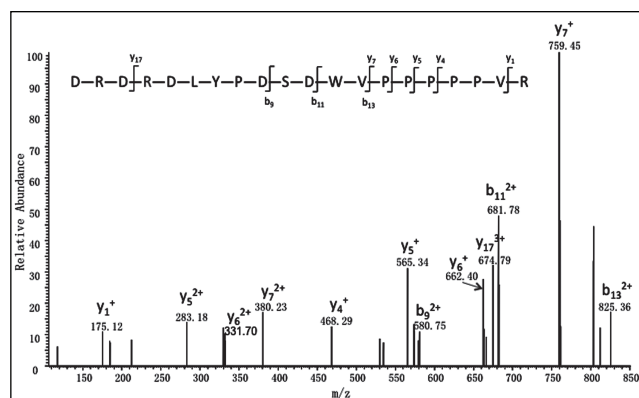**B**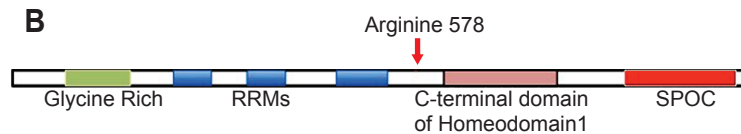**C**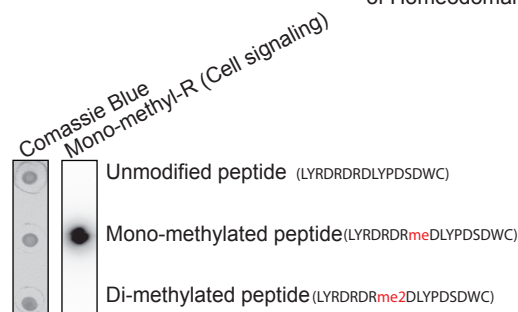**D**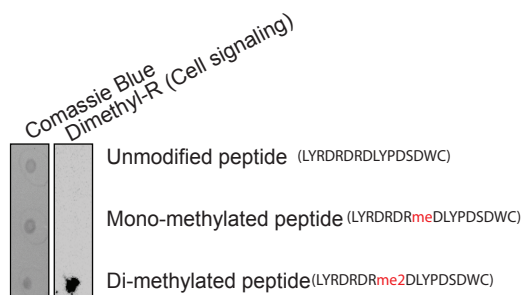**E**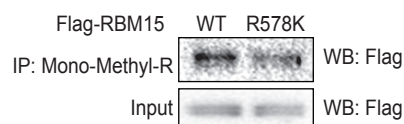**G**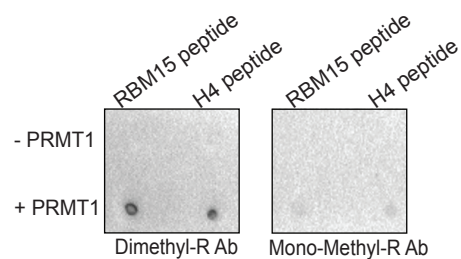**F**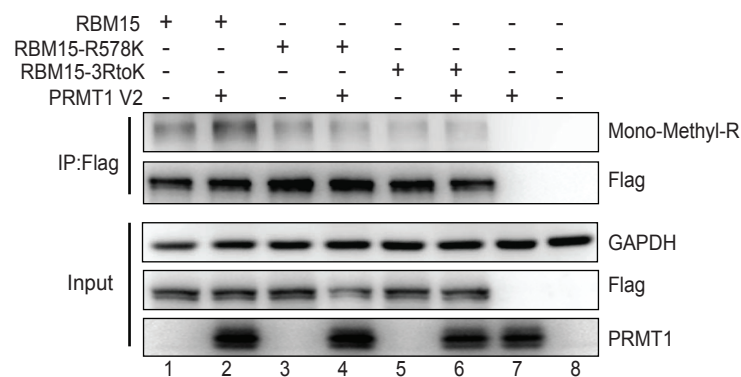

**Figure 1-figure supplement 3. Mapping the methylation site for RBM15.**

Supplement: supp [file elife-07938-supp-v1.zip]

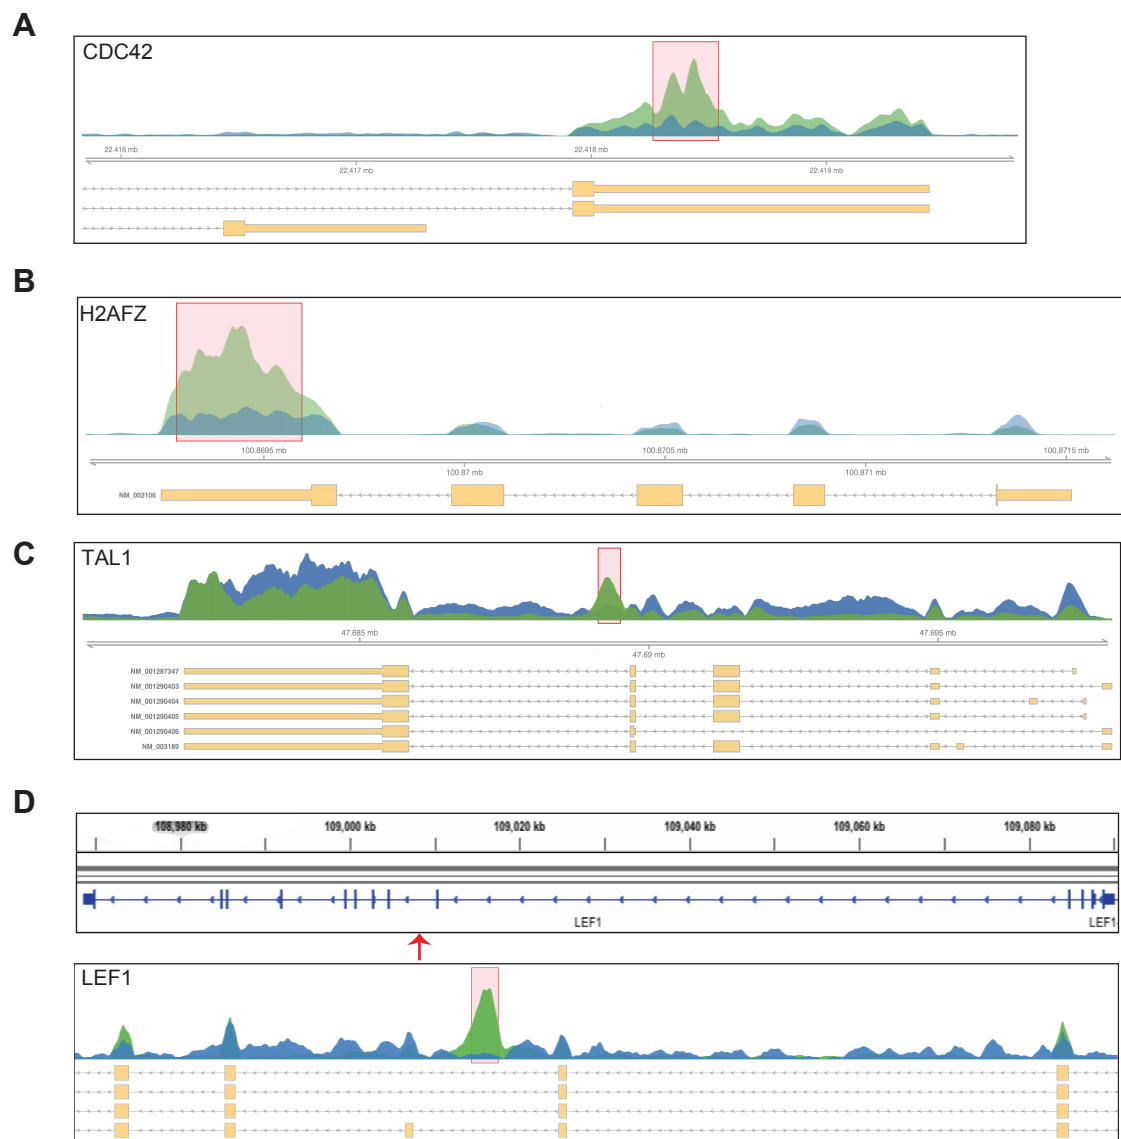

**Figure 5-figure supplement 1.** RBM15 binding to pre-mRNA of genes known important for hematopoiesis.

Supplement: supp [file elife-07938-supp-v1.zip]

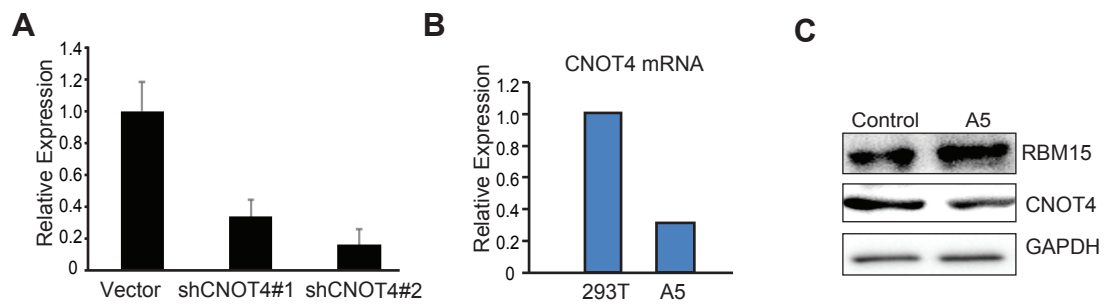

**Figure 3-figure supplement 2.** The efficiency of CNOT4 knockdowns.

Supplement: supp [file elife-07938-supp-v1.zip]

**A**

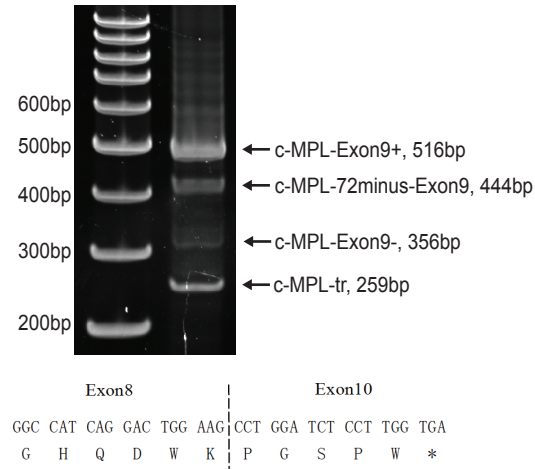

**B**

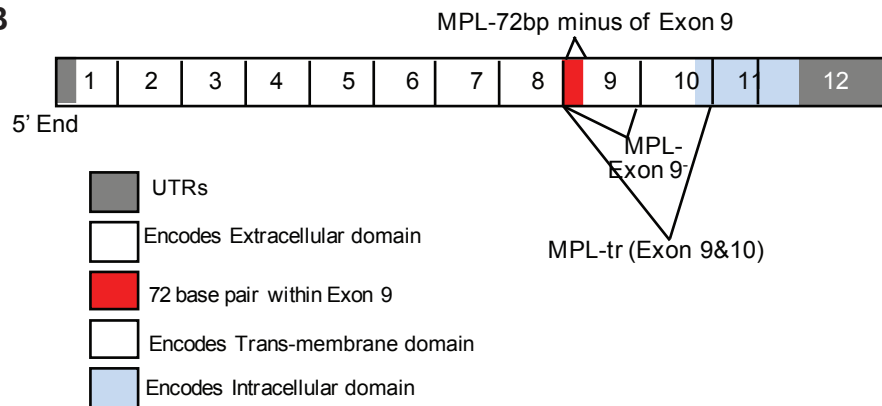

**Figure 6-figure supplement 2.** Schematic diagram of MPL isoforms.

Supplement: supp [file elife-07938-supp-v1.zip]

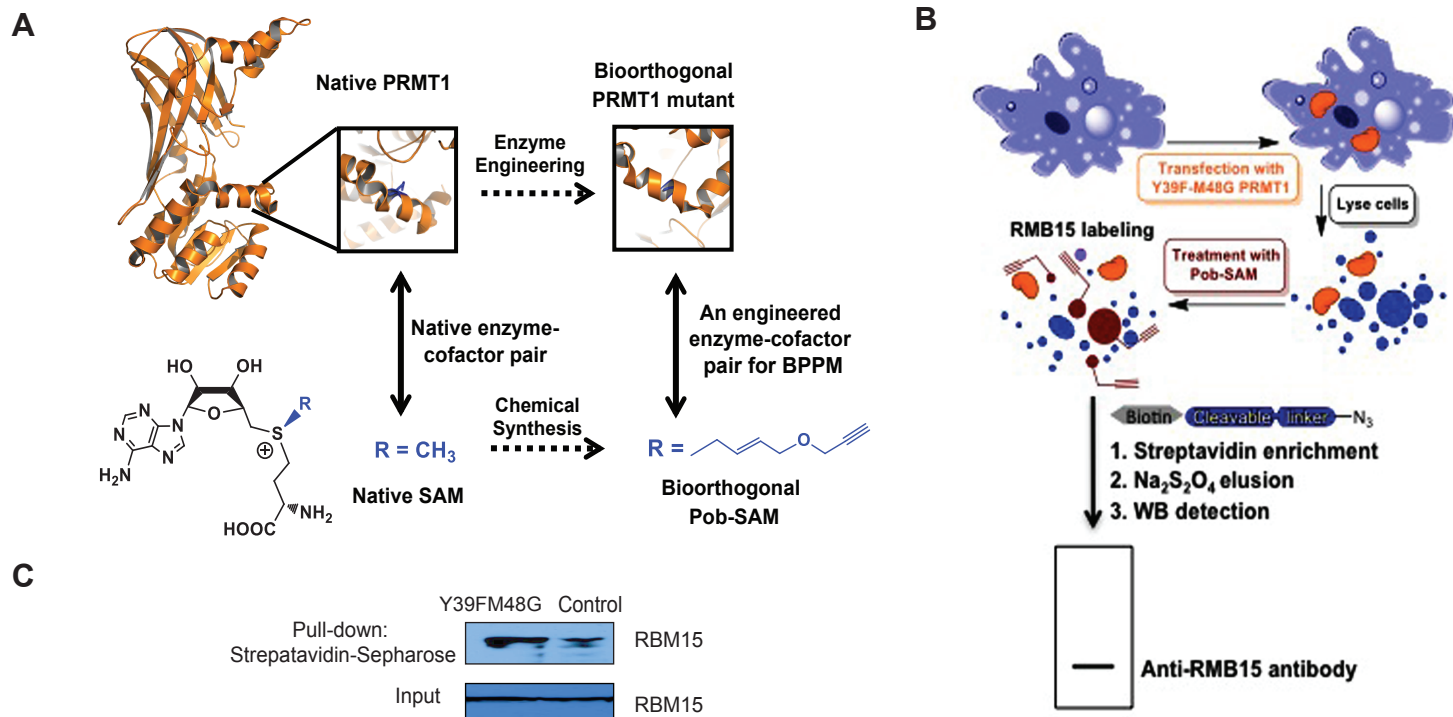

**Figure 1-figure supplement 2.** RMB15 is discovered as a PRMT1 substrate via BPPM.

Supplement: supp [file elife-07938-supp-v1.zip › elife_poa_e07938_Figure_1_figure_supplement_2.pdf]

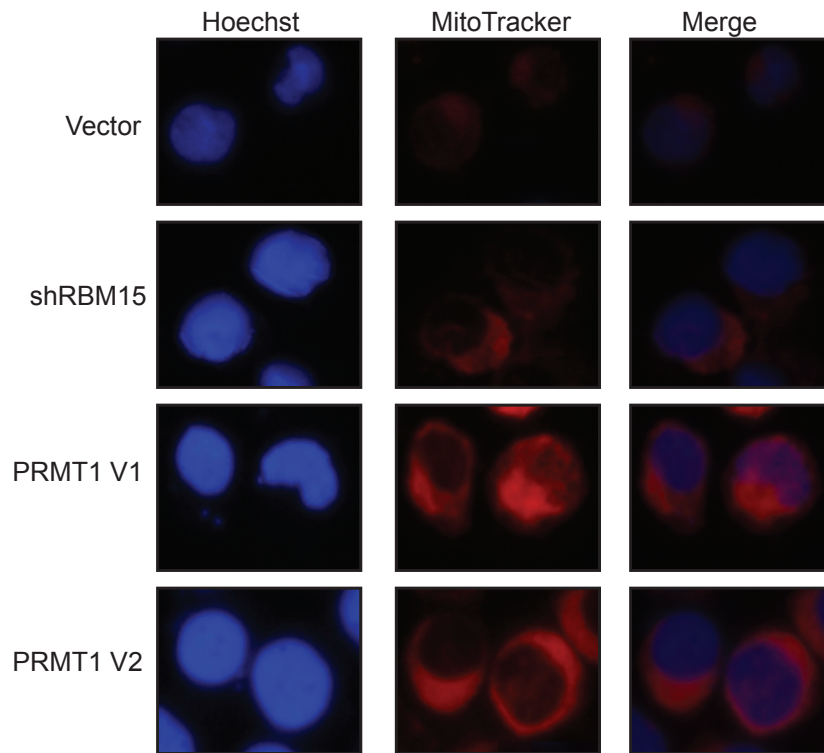

**Figure 5-figure supplement 3.** The mitochondria biogenesis is regulated by the PRMT1-RBM15 pathway.

Supplement: supp [file elife-07938-supp-v1.zip › elife_poa_e07938_Figure_5_figure_supplement_3.pdf]

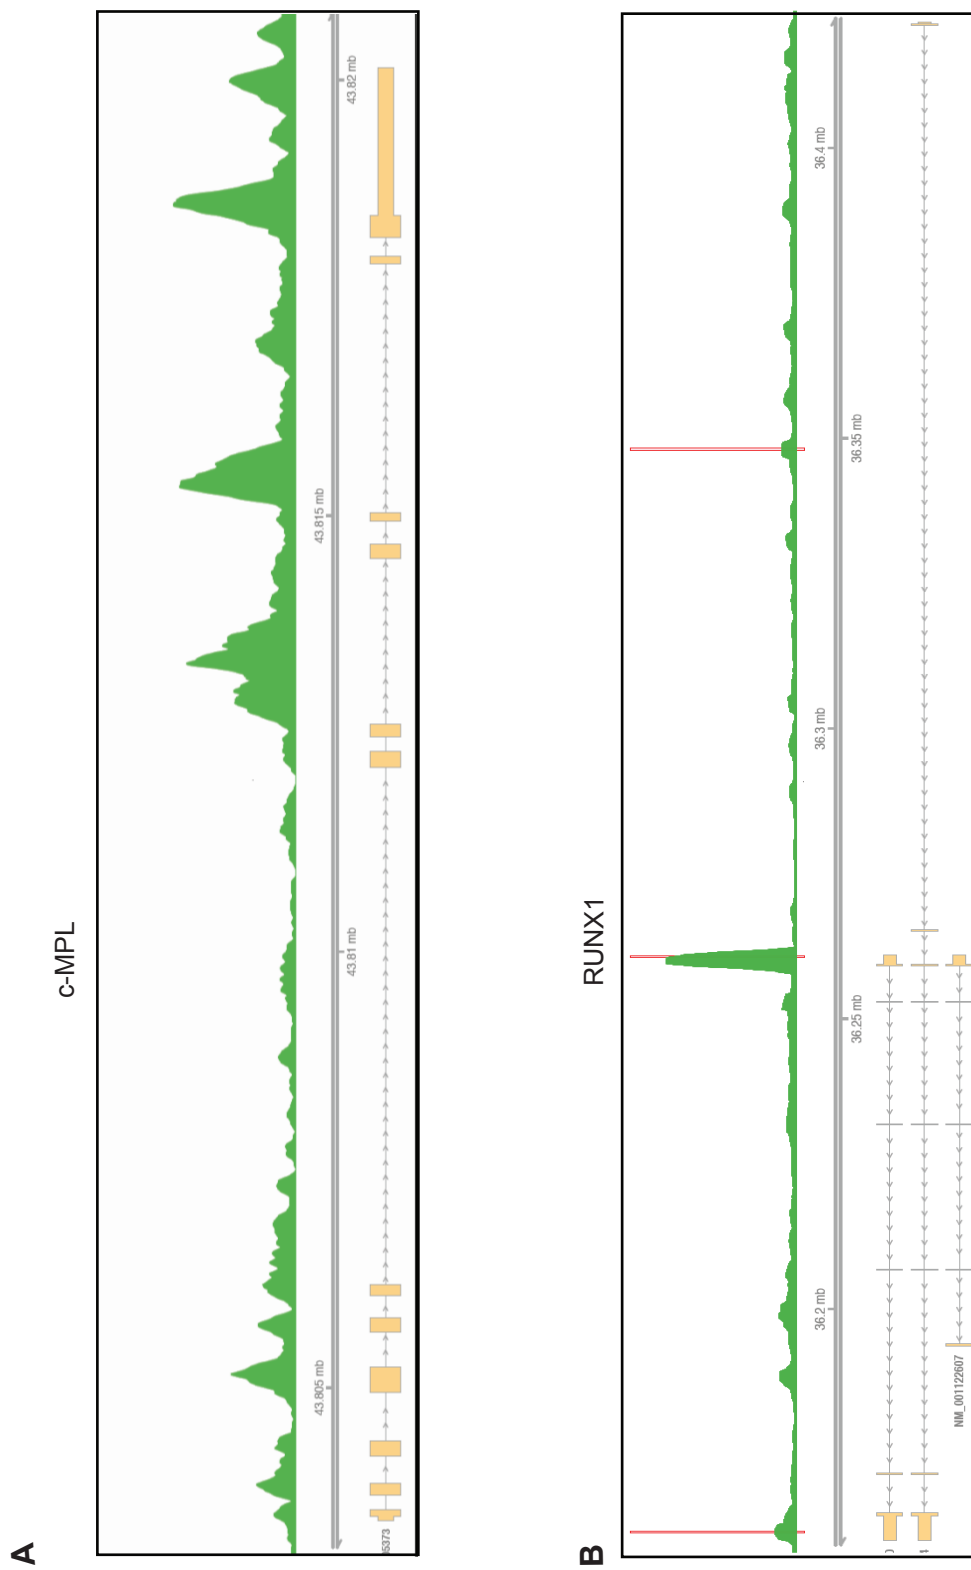

**Figure 5-figure supplement 2.** The RBM15 binding profiles on the c-MPL and RUNX1 pre-mRNAs.

Supplement: supp [file elife-07938-supp-v1.zip › elife_poa_e07938_Figure_5_figure_supplement_2.pdf]
